# Supplementary material for: ACSL4-Associated Lipid Metabolism is a Distinct Therapeutic Vulnerability in KMT2A-Rearranged Acute Myeloid Leukemia
Source: Research Square preprint supplement (doi:10.21203/rs.3.rs-4924771/v1), 2024-10-15
Supplement: Supplementary file 1 [file 49c65f0d4a0d157f996b3415.xlsx]

## Sheet: RNAseq_NOMO1
Supplementary Table S2A: RNA seq data of ACSL4 knockdown in NOMO1 cells
Gene	baseMean	log2FoldChange	lfcSE	stat	pvalue
A1BG	58.4243	-0.461855	0.671275	-0.688026	0.491437
AAAS	479.603	-0.280078	0.280184	-0.999624	0.317492
AAAS_1	471.277	-0.278161	0.279554	-0.995018	0.319728
AACS	296.657	-0.290546	0.273876	-1.06087	0.28875
AADAT	30.8164	-0.213994	0.3998	-0.535252	0.592475
AAGAB	243.097	-0.0385731	0.231246	-0.166805	0.867523
AAK1	466.152	-0.322641	0.274782	-1.17417	0.240327
AAMDC	34.5318	0.200097	0.389203	0.51412	0.607168
AAMP	918.082	-0.121203	0.227677	-0.532345	0.594487
AAR2	162.405	0.256182	0.257815	0.993665	0.320386
AARS1	793.22	-0.351203	0.244382	-1.43711	0.150688
AARS2	626.442	-0.455455	0.309343	-1.47233	0.140932
AASDH	185.824	0.00269945	0.301411	0.00895605	0.992854
AASDHPPT	162.383	0.445766	0.342542	1.30135	0.193139
AATF	356.042	0.208502	0.242336	0.860385	0.389577
AATF_1	354.581	0.198781	0.244185	0.814058	0.415612
AATK	34.6298	-0.696913	0.802107	-0.868852	0.384928
ABAT	72.2369	-0.0978953	0.286358	-0.341863	0.732454
ABCA11P	18.5468	0.440771	0.520037	0.847576	0.396674
ABCA17P	13.5929	-0.394063	0.552474	-0.71327	0.475679
ABCA2	683.796	-0.237867	0.612364	-0.388441	0.69769
ABCA3	16.8737	0.0410507	0.658108	0.0623768	0.950263
ABCA5	386.136	-0.0393729	0.257431	-0.152945	0.878441
ABCA7	1041.72	-0.72616	0.559354	-1.29821	0.194215
ABCB1	8.93675	0.807668	0.770316	1.04849	0.294414
ABCB10	141.688	0.27732	0.269862	1.02763	0.304122
ABCB11	31.6778	0.12695	0.471947	0.268992	0.787936
ABCB11_1	28.7842	0.218636	0.458432	0.47692	0.633419
ABCB4	156.437	-0.128364	0.267566	-0.479746	0.631408
ABCB6	181.598	-0.789131	0.399631	-1.97465	0.0483081
ABCB7	376.87	0.0365303	0.235806	0.154917	0.876887
ABCB8	111.431	-0.682306	0.528605	-1.29077	0.196784
ABCB9	25.6488	-0.271792	0.522406	-0.520269	0.602876
ABCC1	315.906	-0.134519	0.234556	-0.573506	0.566302
ABCC1_1	348.504	-0.171251	0.244617	-0.700077	0.483879
ABCC10	401.389	-0.527158	0.361762	-1.4572	0.145063
ABCC2	117.705	-0.163882	0.298302	-0.549382	0.582743
ABCC3	30.8577	-0.482721	0.580314	-0.831828	0.405506
ABCC4	125.115	0.601816	0.356039	1.69031	0.0909686
ABCC5	588.64	-0.135677	0.234056	-0.579675	0.562134
ABCC6	153.167	-0.442463	0.345393	-1.28104	0.200179
ABCC6_1	149.752	-0.437488	0.339613	-1.2882	0.197677
ABCC6P1	126.017	-0.200929	0.296189	-0.678381	0.49753
ABCC6P2	16.1434	-0.158576	0.648952	-0.244357	0.806955
ABCC6P2_1	15.3327	-0.0560821	0.705114	-0.0795362	0.936606
ABCD1	133.197	0.132738	0.705361	0.188185	0.850732
ABCD3	355.741	0.398198	0.297081	1.34037	0.180126
ABCD4	895.597	-0.411083	0.301096	-1.36529	0.172162
ABCE1	695.124	0.54813	0.324518	1.68906	0.0912086
ABCF1	791.598	-0.234675	0.209312	-1.12117	0.262214
ABCF1_1	859.925	-0.213142	0.21602	-0.986677	0.323801
ABCF1_2	858.912	-0.216817	0.216103	-1.0033	0.315716
ABCF1_3	790.236	-0.235182	0.209574	-1.12219	0.261781
ABCF1_4	790.504	-0.235292	0.209327	-1.12404	0.260997
ABCF1_5	859.108	-0.217435	0.216126	-1.00605	0.314389
ABCF1_6	859.397	-0.216131	0.215942	-1.00088	0.316887
ABCF2	188.203	-0.0870682	0.262904	-0.331179	0.740509
ABCF3	715.275	-0.556208	0.336684	-1.65202	0.0985311
ABHD1	9.91532	-0.298747	0.674021	-0.443231	0.657599
ABHD10	418.791	-0.0456189	0.230122	-0.198238	0.842859
ABHD11	1040.6	-0.487102	0.306536	-1.58905	0.112049
ABHD12	192.299	-0.173736	0.296143	-0.586662	0.557431
ABHD12B	18.5205	0.21852	0.504699	0.432971	0.665036
ABHD13	117.813	0.626575	0.377052	1.66177	0.0965584
ABHD14A	69.5126	-0.0444323	0.408191	-0.108852	0.91332
ABHD14B	283.523	0.257932	0.360097	0.716285	0.473815
ABHD15	187.312	-0.0901651	0.247007	-0.365031	0.715088
ABHD16A	254.986	-0.18327	0.25339	-0.723271	0.469513
ABHD16A_1	256.956	-0.19287	0.253279	-0.761493	0.446363
ABHD16A_2	257.369	-0.192301	0.254414	-0.755857	0.449735
ABHD16A_3	255.131	-0.182294	0.254102	-0.717405	0.473124
ABHD16A_4	256.956	-0.19287	0.253279	-0.761493	0.446363
ABHD16A_5	229.141	-0.176199	0.245732	-0.717039	0.47335
ABHD16A_6	225.695	-0.171199	0.24366	-0.702613	0.482297
ABHD17A	261.843	0.797124	0.709783	1.12305	0.261415
ABHD17B	32.4272	0.549564	0.451513	1.21716	0.223544
ABHD17C	39.1421	0.265556	0.384899	0.689937	0.490234
ABHD18	245.953	0.0290237	0.236852	0.12254	0.902472
ABHD2	58.8028	0.547665	0.380626	1.43885	0.150192
ABHD3	283.048	0.536764	0.261842	2.04995	0.0403692
ABHD4	46.671	-0.321661	0.330073	-0.974516	0.3298
ABHD5	80.2357	0.109278	0.295819	0.369409	0.711823
ABHD6	46.7385	0.216948	0.353368	0.613942	0.539253
ABHD8	33.5753	0.0193357	0.66479	0.0290854	0.976797
ABI1	252.89	0.274513	0.286521	0.958091	0.338017
ABI2	274.851	0.273294	0.277606	0.984468	0.324885
ABI3	24.4692	0.245512	0.423968	0.579082	0.562534
ABITRAM	84.8068	0.701713	0.413835	1.69564	0.0899549
ABL1	288.214	-0.212708	0.317759	-0.669402	0.503239
ABL2	136.272	0.0240381	0.270867	0.0887452	0.929284
ABLIM1	15.3341	0.163456	0.511654	0.319465	0.749374
ABLIM3	15.3389	0.0654845	0.536724	0.122008	0.902893
ABR	735.125	-0.357535	0.363169	-0.984489	0.324875
ABR_1	728.772	-0.356442	0.360909	-0.987622	0.323338
ABR_2	738.406	-0.349935	0.359463	-0.973494	0.330308
ABRACL	628.411	0.45526	0.381635	1.19292	0.232901
ABRAXAS1	24.2351	0.26942	0.456272	0.590481	0.554868
ABRAXAS2	320.905	0.190011	0.275704	0.689187	0.490706
ABT1	286.059	-0.00391868	0.220769	-0.0177501	0.985838
ABT1_1	288.974	-0.0153257	0.217127	-0.0705841	0.943729
ABTB1	493.583	-0.84522	0.567361	-1.48974	0.136292
ABTB2	101.67	0.0769727	0.295003	0.260922	0.794153
ABTB3	27.5903	-0.167668	0.412965	-0.406009	0.684736
ACAA1	295.714	-0.157367	0.334562	-0.470366	0.638093
ACAA2	724.925	0.589176	0.297649	1.97943	0.0477678
ACACA	417.869	0.23146	0.229797	1.00724	0.31382
ACACA_1	430.798	0.199744	0.22596	0.88398	0.376707
ACACB	168.032	-0.630024	0.326273	-1.93097	0.0534867
ACAD10	264.258	-0.231886	0.360397	-0.643419	0.519952
ACAD8	379.235	-0.123659	0.215219	-0.574574	0.56558
ACAD9	748.954	-0.390398	0.280214	-1.39321	0.163555
ACAD9-DT	23.3051	-0.166963	0.437329	-0.381779	0.702626
ACADM	265.008	0.538067	0.293441	1.83364	0.0667068
ACADS	123.421	-0.819295	0.639917	-1.28031	0.200435
ACADSB	54.67	0.102532	0.354162	0.289506	0.772194
ACADVL	6616.67	-0.581948	0.334954	-1.7374	0.0823169
ACAP1	2688.89	-0.693986	0.464985	-1.49249	0.135571
ACAP1_1	2680.69	-0.691485	0.463043	-1.49335	0.135346
ACAP2	356.004	0.46283	0.297344	1.55655	0.119577
ACAP3	537.664	-0.70197	0.586681	-1.19651	0.231497
ACAT1	485.101	0.444233	0.327872	1.3549	0.175451
ACAT2	273.882	0.288397	0.224927	1.28218	0.199779
ACBD3	29.1394	-0.373509	0.471932	-0.791446	0.428684
ACBD4	50.0861	-0.0686527	0.555177	-0.123659	0.901585
ACBD5	29.8837	0.549366	0.475017	1.15652	0.24747
ACBD6	273.635	0.374232	0.305143	1.22641	0.220043
ACBD7	38.9387	0.281656	0.38509	0.731403	0.464533
ACCS	283.643	-0.903719	0.368996	-2.44913	0.0143201
ACD	220.032	-0.374851	0.397969	-0.941908	0.34624
ACE	12.7357	-0.110996	0.713328	-0.155603	0.876346
ACER3	268.472	-0.0722803	0.232936	-0.310302	0.756332
ACIN1	4900.23	-0.289873	0.261551	-1.10828	0.267739
ACLY	1568.14	0.162763	0.188501	0.863464	0.387883
ACO1	95.8622	0.260238	0.340861	0.763474	0.445181
ACO2	145.288	-0.323243	0.344036	-0.939564	0.347441
ACOT1	101.991	0.802356	0.417767	1.92058	0.0547847
ACOT11	81.8489	-0.838608	0.36706	-2.28466	0.0223325
ACOT13	310.878	0.558376	0.322716	1.73024	0.0835874
ACOT2	147.144	0.72074	0.347976	2.07124	0.0383366
ACOT4	20.636	0.599061	0.596449	1.00438	0.315195
ACOT7	110.188	0.0439711	0.34925	0.125901	0.89981
ACOT8	39.6683	-0.259861	0.522745	-0.497108	0.619113
ACOT9	215.217	-0.298803	0.266769	-1.12008	0.262679
ACOX1	184.923	0.603764	0.309562	1.95038	0.0511306
ACOX2	39.49	0.344733	0.347851	0.991035	0.321668
ACOX3	256.943	-0.57221	0.319956	-1.7884	0.0737116
ACOXL	13.9825	-0.836891	0.675826	-1.23832	0.215596
ACP1	356.692	0.347832	0.283516	1.22685	0.219879
ACP2	153.591	-0.470619	0.290672	-1.61907	0.105432
ACP3	154.585	0.364983	0.331869	1.09978	0.271428
ACP6	100.242	0.189375	0.279781	0.67687	0.498489
ACRBP	19.3644	-0.619347	0.527308	-1.17454	0.240177
ACRV1	31.9875	-0.0924343	0.461644	-0.200229	0.841302
ACSF2	491.413	-0.721312	0.371265	-1.94285	0.0520345
ACSF3	183.547	-0.305552	0.454182	-0.672753	0.501105
ACSL1	1157.95	0.213073	0.232895	0.914889	0.36025
ACSL3	274.621	0.713235	0.358569	1.98912	0.0466884
ACSL4	95.6317	-4.08582	0.376045	-10.8652	1.68785e-27
ACSL5	72.0428	0.0021263	0.393217	0.00540744	0.995686
ACSS1	198.505	-0.0248946	0.241425	-0.103115	0.917872
ACSS2	150.634	-0.117296	0.283497	-0.413747	0.679059
ACTB	87798.3	0.318379	0.239592	1.32884	0.183901
ACTG1	24027.3	0.390669	0.297709	1.31225	0.189435
ACTG1_1	23744.4	0.392994	0.297859	1.31939	0.187037
ACTG1P17	44.8853	-0.308941	0.360696	-0.856514	0.391713
ACTG1P4	16.1494	-0.173775	0.525797	-0.330498	0.741023
ACTL6A	833.568	0.318899	0.269191	1.18466	0.236154
ACTMAP	288.934	-0.152798	0.254977	-0.599263	0.548997
ACTN1	1195.77	0.147439	0.187011	0.788401	0.430462
ACTN2	87.8538	-0.605506	0.351507	-1.7226	0.0849607
ACTN4	943.502	-0.0842309	0.410981	-0.204951	0.83761
ACTN4_1	926.032	-0.081268	0.412709	-0.196914	0.843895
ACTR10	242.932	0.0783259	0.266017	0.294439	0.768422
ACTR1A	512.636	0.122843	0.301019	0.408092	0.683206
ACTR1B	402.478	-0.266245	0.280821	-0.948095	0.343081
ACTR1B_1	393.895	-0.255459	0.279845	-0.912859	0.361317
ACTR2	2257.81	0.559172	0.339179	1.64861	0.0992285
ACTR3	1645.44	0.586124	0.330011	1.77608	0.0757202
ACTR3B	69.8058	-0.0481511	0.287337	-0.167577	0.866916
ACTR3C	34.1204	0.267727	0.405874	0.659629	0.509492
ACTR5	219.582	-0.508972	0.333475	-1.52627	0.126943
ACTR6	105.255	0.401299	0.349934	1.14679	0.25147
ACTR8	323.823	-0.203736	0.216606	-0.940586	0.346917
ACVR1	51.6802	0.0702444	0.393309	0.178599	0.858253
ACVR1B	161.22	0.122098	0.251298	0.48587	0.627059
ACVR2A	53.8686	-0.055078	0.348202	-0.158178	0.874316
ACVR2B	102.84	0.190371	0.282521	0.673831	0.500419
ACVRL1	10.6777	-0.109822	0.681494	-0.161149	0.871976
ACY3	61.0652	-0.891519	0.569296	-1.566	0.117348
ACYP1	195.337	0.118974	0.242958	0.48969	0.624353
ACYP2	20.0746	0.858375	0.491464	1.74657	0.0807123
ADA	255.398	-0.098986	0.252125	-0.392607	0.69461
ADA2	237.911	0.0238742	0.223548	0.106797	0.91495
ADAL	37.5365	0.00679484	0.38828	0.0174999	0.986038
ADAM10	143.773	0.612538	0.401529	1.52551	0.127131
ADAM11	21.7713	-0.96557	0.64594	-1.49483	0.134959
ADAM15	56.0316	0.611043	0.735923	0.830308	0.406365
ADAM17	86.4961	0.637018	0.447918	1.42217	0.154975
ADAM22	35.2681	0.103524	0.413725	0.250223	0.802415
ADAM28	195.192	-0.00109647	0.28169	-0.00389246	0.996894
ADAM33	25.4999	-0.973577	0.5282	-1.8432	0.0653003
ADAM8	252.858	-0.656501	0.465791	-1.40943	0.158707
ADAM9	96.0872	0.365595	0.343575	1.06409	0.287288
ADAM9_1	67.8103	0.65344	0.394561	1.65612	0.097698
ADAMTS1	117.871	-0.0536646	0.275797	-0.19458	0.845722
ADAMTS10	367.784	-0.625662	0.615835	-1.01596	0.30965
ADAMTS13	15.2178	-0.714435	0.686077	-1.04133	0.29772
ADAMTS13_1	15.2178	-0.714435	0.686077	-1.04133	0.29772
ADAMTS14	140.728	-1.13541	0.43385	-2.61707	0.00886891
ADAMTS2	16.432	0.0421561	0.602063	0.0700194	0.944178
ADAMTSL4	905.512	-0.70343	0.413112	-1.70276	0.0886134
ADAMTSL5	106.469	-0.312404	0.349197	-0.894633	0.370983
ADAP1	262.394	-0.548126	0.648804	-0.844824	0.398209
ADAP2	92.732	0.0203395	0.315642	0.0644387	0.948621
ADAP2_1	91.1393	0.0463012	0.314653	0.14715	0.883014
ADAR	1362.5	0.0571205	0.200411	0.285017	0.775631
ADARB1	513.915	-0.30599	0.244196	-1.25305	0.210188
ADAT1	209.49	-0.082549	0.256807	-0.321443	0.747874
ADAT2	764.12	-0.129249	0.221685	-0.58303	0.559873
ADAT3	30.4082	0.217536	0.979141	0.22217	0.824181
ADCK1	182.817	-0.495212	0.352523	-1.40476	0.160091
ADCK2	29.5698	-0.0280704	0.436705	-0.0642777	0.948749
ADCK5	84.3317	0.0361149	0.749786	0.0481669	0.961583
ADCK5_1	82.7865	0.00775595	0.749267	0.0103514	0.991741
ADCY1	38.7777	-0.00690518	0.393591	-0.0175441	0.986003
ADCY10P1	38.2031	-0.3165	0.420034	-0.753509	0.451144
ADCY3	133.883	-0.115116	0.259502	-0.443601	0.657331
ADCY4	117.314	-0.394089	0.325491	-1.21075	0.22599
ADCY4_1	114.626	-0.406811	0.324353	-1.25422	0.209761
ADCY6	164.076	-0.0730464	0.268827	-0.271722	0.785835
ADCY7	287.358	0.0668677	0.320022	0.208947	0.834489
ADCY9	120.273	0.0265052	0.255401	0.103779	0.917345
ADD1	554.707	-0.0472924	0.242615	-0.194927	0.84545
ADD2	500.895	-0.107298	0.23077	-0.464956	0.641963
ADD3	279.499	0.432836	0.262675	1.6478	0.0993944
ADGRA2	27.3011	-0.119059	0.443785	-0.268281	0.788483
ADGRA3	544.674	-0.202153	0.194858	-1.03744	0.299533
ADGRB3-DT	11.0565	-0.253111	0.614171	-0.412118	0.680253
ADGRE1	191.514	-0.0392362	0.281497	-0.139384	0.889146
ADGRE2	260.41	-0.174082	0.274171	-0.634938	0.525469
ADGRE3	13.9154	0.607555	0.556643	1.09146	0.27507
ADGRE4P	775.537	-0.0156453	0.212226	-0.0737202	0.941233
ADGRE5	337.98	-0.330386	0.408976	-0.807837	0.419184
ADGRF3	21.3323	-0.139478	0.471942	-0.29554	0.767582
ADGRG3	340.291	-0.601965	0.369426	-1.62946	0.103215
ADGRG5	243.752	-0.506083	0.312434	-1.61981	0.105274
ADGRL1	606.871	-0.549701	0.374472	-1.46794	0.142122
ADGRL1_1	596.925	-0.547975	0.376031	-1.45726	0.145044
ADGRL1-AS1	24.6617	-0.196542	0.454948	-0.43201	0.665734
ADGRL1-AS1_1	25.1744	-0.178863	0.454704	-0.393361	0.694053
ADGRL2	1315.96	0.258503	0.247683	1.04369	0.296631
ADH5	387.263	0.626898	0.330191	1.89859	0.057618
ADHFE1	11.2635	-0.127918	0.606129	-0.211041	0.832855
ADI1	737.777	0.236284	0.269235	0.877614	0.380153
ADI1_1	674.754	0.246155	0.273601	0.899687	0.368287
ADIPOR1	395.23	0.255076	0.237021	1.07617	0.281849
ADIPOR2	1330.74	0.408842	0.253359	1.61369	0.106595
ADIPOR2_1	1306.69	0.416357	0.255316	1.63075	0.102942
ADIRF-AS1	186.995	-0.359007	0.318925	-1.12568	0.260301
ADISSP	156.561	0.0083099	0.484992	0.0171341	0.98633
ADK	429.195	0.280785	0.249986	1.1232	0.261352
ADM	37.9815	-0.512991	0.423409	-1.21157	0.225676
ADM2	14.9718	0.546467	0.604148	0.904526	0.365717
ADM5	124.422	-0.672936	0.628566	-1.07059	0.284354
ADNP	965.622	0.101212	0.240743	0.420414	0.674183
ADNP2	225.083	0.149188	0.269084	0.554427	0.579287
ADNP-AS1	9.65159	0.108816	0.688186	0.158121	0.874362
ADO	171.26	0.596379	0.36299	1.64296	0.100391
ADORA1	20.9588	-0.65878	0.572156	-1.1514	0.249568
ADORA2B	84.0832	0.0590862	0.327102	0.180635	0.856654
ADORA3	48.0794	0.147307	0.386599	0.381032	0.70318
ADPGK	1096.88	-0.0177582	0.211671	-0.0838955	0.93314
ADPRH	73.1497	0.480864	0.373374	1.28789	0.197785
ADPRHL1	39.8309	-0.0371945	0.41405	-0.0898308	0.928422
ADPRM	26.4225	0.156361	0.460537	0.339518	0.73422
ADPRS	218.366	-0.287173	0.297644	-0.96482	0.334635
ADRA2C	12.5172	0.504966	0.652262	0.774177	0.438826
ADRB1	9.49283	-0.181417	0.638382	-0.284183	0.776271
ADRB2	28.9102	-0.110586	0.435641	-0.253848	0.799613
ADRM1	552.135	-0.274091	0.540591	-0.507022	0.612139
ADSL	780.053	0.0712751	0.219884	0.324148	0.745826
ADSS1	38.2244	-0.715193	0.368834	-1.93907	0.0524934
ADSS2	281.12	0.416328	0.308905	1.34775	0.177737
AEBP1	346.008	-0.651478	0.327942	-1.98657	0.0469705
AEBP2	98.791	0.657146	0.383249	1.71467	0.086406
AEN	110.131	0.0694847	0.274696	0.252951	0.800306
AFAP1L1	14.6956	0.179864	0.538469	0.334028	0.738359
AFDN	356.744	0.0715364	0.217321	0.329173	0.742025
AFF1	403.861	0.348565	0.262567	1.32753	0.184335
AFF1-AS1	72.337	-0.515449	0.393749	-1.30908	0.190507
AFF2	28.0103	0.552754	0.521506	1.05992	0.289181
AFF3	144.572	0.10179	0.273217	0.37256	0.709476
AFF4	110.616	0.567344	0.405019	1.40078	0.161279
AFG1L	83.6853	-0.244211	0.276989	-0.881663	0.377959
AFG3L1P	1217.75	-0.253715	0.255046	-0.994782	0.319842
AFG3L2	258.595	0.280272	0.258349	1.08486	0.277985
AFMID	310.633	-0.247321	0.245721	-1.00651	0.314169
AFTPH	411.116	0.137314	0.294619	0.466072	0.641164
AGA	205.709	0.139051	0.272724	0.509861	0.610149
AGA-DT	14.8114	-0.0392068	0.649079	-0.0604038	0.951834
AGAP10P	232.425	0.121597	0.358186	0.33948	0.734248
AGAP11	125.208	-0.502732	0.484463	-1.03771	0.299405
AGAP12P	410.316	-0.307345	0.276694	-1.11078	0.266665
AGAP12P_1	410.424	-0.306483	0.276927	-1.10673	0.268412
AGAP13P	190.513	0.0391348	0.36986	0.10581	0.915733
AGAP14P	124.608	0.130343	0.370883	0.351439	0.725259
AGAP2	172.517	-0.583708	0.356983	-1.63511	0.102025
AGAP3	352.999	-0.703432	0.418996	-1.67885	0.0931812
AGAP7P	823.625	-0.434519	0.3147	-1.38074	0.167359
AGBL2	16.9764	-0.963958	0.499817	-1.92862	0.0537776
AGBL2_1	16.9764	-0.963958	0.499817	-1.92862	0.0537776
AGBL5	140.475	0.0985726	0.253495	0.388854	0.697384
AGER	569.61	-0.776029	0.408541	-1.89951	0.0574972
AGER_1	556.542	-0.78104	0.413075	-1.8908	0.0586516
AGER_2	575.856	-0.760142	0.408638	-1.86018	0.0628594
AGER_3	572.553	-0.767794	0.410142	-1.87202	0.061204
AGER_4	556.702	-0.781696	0.412816	-1.89357	0.0582819
AGER_5	574.251	-0.768166	0.40989	-1.87408	0.0609196
AGER_6	571.294	-0.7743	0.41192	-1.87973	0.0601447
AGFG1	509.419	0.34578	0.28183	1.22691	0.219857
AGFG2	75.6272	-0.402656	0.355218	-1.13355	0.256985
AGGF1	226.041	0.248653	0.312704	0.795171	0.426514
AGK	102.542	0.356626	0.307881	1.15832	0.246732
AGK_1	91.3736	0.383179	0.314083	1.21999	0.222467
AGL	152.605	0.269868	0.288658	0.934907	0.349836
AGMAT	60.0538	0.252066	0.384469	0.65562	0.512069
AGO1	614.016	-0.0534371	0.219371	-0.243592	0.807547
AGO2	331.984	0.317188	0.270999	1.17044	0.241824
AGO3	335.253	0.260097	0.248424	1.04699	0.295106
AGO4	393.556	-0.0630135	0.2212	-0.284871	0.775743
AGPAT1	196.319	0.443372	0.316138	1.40246	0.160777
AGPAT1_1	183.126	0.457689	0.317095	1.44338	0.148913
AGPAT1_2	189.041	0.460341	0.308664	1.4914	0.135856
AGPAT1_3	183.593	0.441864	0.308629	1.4317	0.15223
AGPAT1_4	189.041	0.460341	0.308664	1.4914	0.135856
AGPAT1_5	189.041	0.460341	0.308664	1.4914	0.135856
AGPAT1_6	184.321	0.452609	0.316301	1.43095	0.152446
AGPAT2	304.425	-0.101889	0.668017	-0.152525	0.878773
AGPAT3	631.016	-0.0804406	0.221305	-0.363484	0.716244
AGPAT4	209.804	-0.474519	0.36682	-1.2936	0.195803
AGPAT4-IT1	13.9535	-0.67615	0.627798	-1.07702	0.281472
AGPAT5	316.257	0.498384	0.374751	1.32991	0.183549
AGPAT5_1	310.486	0.508115	0.37525	1.35407	0.175715
AGPS	271.431	0.493454	0.298878	1.65102	0.0987346
AGRN	181.921	-0.444323	0.591729	-0.750889	0.452719
AGT	357.43	0.247088	0.243527	1.01462	0.310287
AGTPBP1	314.339	0.167632	0.253127	0.662242	0.507816
AGTRAP	245.413	-0.463743	0.473442	-0.979513	0.327326
AHCTF1	559.331	0.325104	0.24986	1.30115	0.193208
AHCTF1P1	88.347	0.754445	0.325995	2.31428	0.0206522
AHCY	536.949	0.150437	0.236994	0.63477	0.525578
AHCYL1	376.68	0.333763	0.269346	1.23916	0.215286
AHCYL2	38.4033	0.434902	0.378999	1.1475	0.251175
AHDC1	82.3939	-0.172029	0.352524	-0.487992	0.625555
AHI1	601.767	-0.295681	0.306806	-0.96374	0.335176
AHNAK	421.148	0.584184	0.303505	1.92479	0.0542551
AHR	62.094	0.597413	0.415002	1.43954	0.149997
AHSA1	635.893	0.28903	0.277058	1.04321	0.29685
AHSA2P	3708.17	-0.474224	0.328226	-1.44481	0.148511
AIDA	238.615	0.183584	0.287493	0.638569	0.523104
AIF1	2801.65	0.24467	0.313084	0.781484	0.434518
AIF1_1	2800.61	0.244416	0.312977	0.780938	0.434839
AIF1_2	2865.79	0.254342	0.316904	0.802585	0.422215
AIF1_3	2711.01	0.232069	0.305875	0.758706	0.448029
AIF1_4	2801.98	0.24499	0.312646	0.783603	0.433273
AIF1_5	2805.95	0.245953	0.313347	0.784923	0.432499
AIFM1	404.717	0.280918	0.286117	0.981831	0.326183
AIFM2	110.889	-0.367153	0.325955	-1.12639	0.259999
AIFM3	276.616	-0.985809	0.504517	-1.95396	0.0507054
AIG1	708.707	0.247166	0.260158	0.950062	0.342081
AIM2	36.0475	0.328755	0.414024	0.794048	0.427168
AIMP1	877.886	-0.228929	0.27238	-0.840476	0.400642
AIMP2	94.6411	0.209349	0.311962	0.671072	0.502175
AIP	373.146	-0.0234323	0.481233	-0.0486923	0.961164
AJM1	83.4961	-0.813165	0.762136	-1.06695	0.285992
AJUBA	9.56563	-0.183045	0.711922	-0.257114	0.797091
AK2	5842.84	0.23894	0.276109	0.865381	0.38683
AK3	220.058	0.415281	0.294479	1.41022	0.158474
AK4	123.287	0.16789	0.388776	0.431841	0.665857
AK5	9.24976	-0.226454	0.791323	-0.286172	0.774747
AK6	310.833	0.321998	0.313008	1.02872	0.303611
AK6_1	310.369	0.321658	0.315182	1.02055	0.307468
AK6_2	311.562	0.324232	0.315102	1.02898	0.303491
AK9	27.9125	0.166633	0.397039	0.419688	0.674713
AKAP1	846.063	-0.162457	0.250958	-0.647347	0.517408
AKAP10	311.697	0.11891	0.241022	0.49336	0.621758
AKAP11	161.24	0.31323	0.347495	0.901394	0.367379
AKAP13	87.2225	0.0804865	0.287655	0.279802	0.77963
AKAP17A	1850.15	-0.401998	0.316242	-1.27117	0.203668
AKAP17A_1	1888.17	-0.408213	0.314899	-1.29633	0.194862
AKAP7	26.6644	0.130204	0.40517	0.321357	0.74794
AKAP8	975.856	-0.364627	0.27616	-1.32035	0.186719
AKAP8L	1297.64	-0.742528	0.388094	-1.91327	0.055714
AKAP9	852.801	0.0583684	0.218754	0.266823	0.789606
AKIP1	151.74	0.0149797	0.242337	0.0618138	0.950711
AKIRIN1	194.524	0.375348	0.362104	1.03657	0.299934
AKIRIN2	421.085	0.497677	0.320429	1.55316	0.120386
AKNA	686.744	-0.031918	0.277425	-0.115051	0.908405
AKR1A1	579.291	-0.342322	0.279348	-1.22543	0.220413
AKR1B1	226.674	0.144786	0.279586	0.517859	0.604557
AKR1C1	98.3689	0.29486	0.295031	0.999422	0.31759
AKR1C2	112.479	0.120378	0.271741	0.442988	0.657774
AKR1C3	91.2655	0.34128	0.386702	0.88254	0.377485
AKR1E2	23.2973	-0.547563	0.4458	-1.22827	0.219345
AKR7A2	134.3	0.0425602	0.306886	0.138684	0.8897
AKR7A3	28.7644	-0.622973	0.602258	-1.0344	0.300951
AKR7L	14.4395	-0.0541014	0.595181	-0.090899	0.927573
AKT1	2221.91	-0.300366	0.350846	-0.856117	0.391933
AKT1S1	326.638	-0.0934138	0.303575	-0.307712	0.758301
AKT2	462.637	-0.0256596	0.36519	-0.0702637	0.943984
AKT3	127.472	0.271955	0.297727	0.913437	0.361013
AKT3_1	124.047	0.29705	0.302717	0.981279	0.326455
AKTIP	41.0768	0.486435	0.359563	1.35285	0.176104
ALAD	322.838	0.136961	0.252327	0.542793	0.587272
ALAS1	1157.28	-0.019615	0.206382	-0.0950421	0.924281
ALCAM	625.836	0.247848	0.249768	0.992311	0.321046
ALDH16A1	777.18	-0.55306	0.520416	-1.06273	0.287906
ALDH18A1	276.014	0.306356	0.277871	1.10251	0.270239
ALDH1A3-AS1	9.71161	0.555236	0.689698	0.805043	0.420795
ALDH1B1	114.012	0.453135	0.336077	1.34831	0.177559
ALDH1L2	51.1012	0.247977	0.322274	0.76946	0.44162
ALDH2	520.661	0.468086	0.24613	1.90179	0.0571987
ALDH3A1	11.4203	0.0827785	0.618408	0.133857	0.893515
ALDH3A2	1201.48	-0.0230882	0.200821	-0.114969	0.90847
ALDH3B1	251.408	-0.252382	0.29133	-0.866312	0.386319
ALDH4A1	72.9741	-0.32111	0.362719	-0.885285	0.376003
ALDH5A1	87.3001	-0.177667	0.279153	-0.63645	0.524483
ALDH6A1	37.0464	0.31761	0.415222	0.764916	0.444321
ALDH7A1	23.5174	0.275065	0.56999	0.482579	0.629395
ALDH8A1	102.573	-0.312544	0.31914	-0.97933	0.327417
ALDH9A1	297.51	0.400764	0.336472	1.19108	0.233624
ALDOA	18.5088	0.188814	0.798879	0.236349	0.813162
ALDOC	79.4512	-0.218057	0.356125	-0.612304	0.540337
ALG1	59.879	-0.0476265	0.328912	-0.1448	0.884869
ALG10	34.3076	0.158449	0.436423	0.363063	0.716558
ALG10B	64.2241	0.637236	0.527055	1.20905	0.226643
ALG11	49.7903	0.412992	0.37824	1.09188	0.274886
ALG12	106.7	0.00948763	0.492809	0.0192521	0.98464
ALG13	467.414	0.0263443	0.245269	0.10741	0.914464
ALG14	77.474	0.510805	0.312501	1.63457	0.102139
ALG2	383.012	0.0135544	0.236413	0.0573338	0.954279
ALG3	795.606	0.0442703	0.285551	0.155035	0.876794
ALG5	455.558	0.199842	0.297087	0.672671	0.501157
ALG6	266.001	-0.0206863	0.3026	-0.0683619	0.945498
ALG8	775.189	-0.117791	0.209418	-0.562468	0.573797
ALG9	260.88	-0.0639247	0.240995	-0.265253	0.790814
ALKAL1	14.7662	0.507865	0.634458	0.80047	0.423439
ALKBH1	141.609	0.135947	0.287755	0.472441	0.636612
ALKBH2	202.348	-0.406282	0.299578	-1.35618	0.175042
ALKBH3	119.036	-0.221897	0.254309	-0.872551	0.382908
ALKBH4	93.3569	-0.3476	0.338796	-1.02599	0.304898
ALKBH5	356.194	0.523865	0.336949	1.55473	0.12001
ALKBH6	175.577	-0.136127	0.421032	-0.323319	0.746454
ALKBH7	36.9339	0.503539	0.608948	0.8269	0.408294
ALKBH8	76.7785	0.314174	0.36126	0.869663	0.384485
ALMS1	92.5394	0.288554	0.297521	0.969862	0.332115
ALMS1_1	92.2031	0.272902	0.297565	0.917117	0.359081
ALOX12	10.0585	-0.0798491	0.62761	-0.127227	0.898761
ALOX12-AS1	10.0725	0.257376	0.644606	0.399277	0.689689
ALOX5	183.759	-0.491885	0.345276	-1.42462	0.154268
ALOX5_1	179.935	-0.48323	0.350332	-1.37935	0.167787
ALOX5AP	20536.9	0.429791	0.284075	1.51295	0.130292
ALPK1	351.855	-0.163725	0.23566	-0.694753	0.48721
ALS2	286.692	-0.150423	0.253424	-0.593562	0.552805
ALS2CL	15.6718	-0.661419	0.5431	-1.21786	0.223278
ALYREF	1256.28	-0.0458942	0.338114	-0.135736	0.89203
AMBRA1	173.474	-0.214339	0.280057	-0.765341	0.444069
AMD1	565.882	0.506337	0.340548	1.48683	0.137059
AMDHD1	10.1421	0.17828	0.663558	0.268674	0.788181
AMDHD2	31.3192	-0.514058	1.57172	-0.327068	0.743616
AMER1	70.17	-0.0562654	0.349225	-0.161115	0.872003
AMFR	179.778	0.31022	0.27322	1.13542	0.256198
AMH	10.0815	0.384975	1.19421	0.322368	0.747174
AMIGO1	13.0911	-0.500409	0.616139	-0.812168	0.416695
AMIGO2	12.2335	-0.449319	0.688677	-0.652437	0.514119
AMIGO3	89.0483	-0.764387	0.554428	-1.37869	0.167989
AMMECR1	158.537	0.152321	0.309611	0.491976	0.622736
AMMECR1L	366.782	-0.0790664	0.242712	-0.325762	0.744604
AMN	12.0846	0.331483	1.21641	0.272509	0.785231
AMN1	17.7347	0.0406052	0.53479	0.0759274	0.939477
AMOTL1	173.624	-0.0560842	0.231589	-0.242171	0.808648
AMPD2	787.359	-0.831285	0.386836	-2.14893	0.0316397
AMPD3	157.287	0.0422663	0.262555	0.160981	0.872108
AMT	330.23	-0.697382	0.348249	-2.00254	0.0452267
AMY1A	113.41	-0.720693	0.417333	-1.7269	0.0841854
AMY1B	89.6017	-0.66529	0.403334	-1.64947	0.0990506
AMY1C	109.815	-0.597834	0.426522	-1.40165	0.16102
AMY2A	53.3163	-0.369808	0.36798	-1.00497	0.314912
AMY2B	473.797	-0.282713	0.278681	-1.01447	0.310361
AMZ2	549.855	-0.0652722	0.252162	-0.25885	0.795751
AMZ2P1	147.285	-0.204662	0.301911	-0.677888	0.497842
ANAPC1	671.958	0.0474888	0.196754	0.241361	0.809275
ANAPC10	98.414	0.42619	0.397455	1.0723	0.283586
ANAPC11	144.405	-0.168376	0.537511	-0.313251	0.75409
ANAPC13	519.386	0.466449	0.355654	1.31152	0.189681
ANAPC15	37.3994	-0.0821526	0.508576	-0.161535	0.871672
ANAPC16	910.368	0.090335	0.228725	0.394951	0.692879
ANAPC1P2	239.884	-0.302077	0.225177	-1.34151	0.179756
ANAPC1P4	237.07	-0.2514	0.227816	-1.10352	0.269802
ANAPC2	284.831	-0.369699	0.630906	-0.585981	0.557888
ANAPC4	785.591	-0.295077	0.308832	-0.95546	0.339345
ANAPC5	2578.36	-0.254571	0.227121	-1.12086	0.262347
ANAPC7	2516.41	-0.457452	0.280229	-1.63242	0.102591
ANGEL1	419.943	-0.222687	0.220611	-1.00941	0.312778
ANGEL2	198.038	-0.0457537	0.293938	-0.155658	0.876303
ANGPT1	14.9508	0.242479	0.567086	0.427587	0.668952
ANGPTL4	15.2683	-0.63776	0.585004	-1.09018	0.275634
ANGPTL6	15.6556	-1.23986	0.6674	-1.85774	0.0632057
ANK2	13.2686	0.309208	0.571159	0.54137	0.588252
ANKAR	17.1069	0.556287	0.580314	0.958596	0.337762
ANKDD1A	14.9815	-0.198322	0.604771	-0.327929	0.742966
ANKEF1	11.1717	0.523905	0.60843	0.861077	0.389195
ANKFY1	1111.9	-0.136544	0.182699	-0.747374	0.454838
ANKH	349.479	0.224355	0.230985	0.971295	0.331401
ANKHD1	282.807	0.0334552	0.302669	0.110534	0.911986
ANKHD1-EIF4EBP3	36.6835	-0.393823	0.368056	-1.07001	0.284616
ANKIB1	464.983	0.135098	0.250904	0.538445	0.59027
ANKLE1	272.328	0.396615	0.270861	1.46427	0.14312
ANKLE2	1158.34	-0.207924	0.216234	-0.961573	0.336264
ANKMY1	269.167	-0.361138	0.298051	-1.21166	0.225642
ANKMY2	249.147	0.0211596	0.300689	0.0703704	0.943899
ANKRA2	81.4716	0.288625	0.319313	0.903894	0.366052
ANKRD10	2845.59	0.00757708	0.214487	0.0353266	0.971819
ANKRD11	950.612	-0.0473721	0.287586	-0.164723	0.869162
ANKRD12	202.619	0.448036	0.337667	1.32686	0.184555
ANKRD13A	744.973	-0.0995677	0.228954	-0.434881	0.663649
ANKRD13B	103.128	-0.297106	0.417921	-0.710913	0.477138
ANKRD13C	142.814	0.253377	0.25106	1.00923	0.312866
ANKRD13D	1500.68	-0.71239	0.597225	-1.19283	0.232935
ANKRD16	27.0003	0.122515	0.423215	0.289487	0.772209
ANKRD17	999.015	-0.326458	0.338305	-0.964979	0.334555
ANKRD17-DT	18.6158	-1.07169	0.599731	-1.78695	0.0739461
ANKRD18A	139.602	-0.500722	0.40688	-1.23064	0.218458
ANKRD18B	642.283	-0.886285	0.534726	-1.65745	0.0974276
ANKRD18CP	51.0788	0.439123	0.474387	0.925665	0.35462
ANKRD18DP	201.998	-0.0258905	0.282669	-0.0915928	0.927022
ANKRD18DP_1	168.767	0.0653856	0.285059	0.229375	0.818577
ANKRD19P	38.7215	-0.507787	0.390698	-1.29969	0.193707
ANKRD20A4-ANKRD20A20P	21.6287	-0.773818	0.493729	-1.56729	0.117046
ANKRD22	393.71	-0.0640136	0.292192	-0.219081	0.826587
ANKRD23	29.7461	0.0448441	0.459908	0.0975066	0.922324
ANKRD24	34.4368	-1.13945	0.589195	-1.93391	0.0531236
ANKRD26	63.2101	-0.212312	0.399329	-0.531672	0.594953
ANKRD26P3	14.389	-0.551224	0.520188	-1.05966	0.289298
ANKRD27	472.571	0.118394	0.218924	0.540801	0.588645
ANKRD28	366.149	0.227548	0.287975	0.790167	0.42943
ANKRD33B	404.277	0.396279	0.297122	1.33373	0.182294
ANKRD34B	48.4154	-0.0225878	0.381918	-0.059143	0.952838
ANKRD35	11.2626	-0.294139	0.603092	-0.487719	0.625749
ANKRD36	403.577	-0.155675	0.273406	-0.569389	0.569092
ANKRD36_1	403.041	-0.155114	0.274067	-0.565971	0.571413
ANKRD36B	372.553	-0.165377	0.272905	-0.605987	0.544523
ANKRD36B_1	370.882	-0.16315	0.272805	-0.598044	0.54981
ANKRD36C	68.7655	0.176756	0.352334	0.501671	0.615899
ANKRD39	28.3609	0.338648	0.398402	0.850017	0.395316
ANKRD40	309.495	0.192932	0.226153	0.853105	0.393601
ANKRD42	100.092	0.04214	0.29217	0.144231	0.885318
ANKRD44	150.85	0.277784	0.308832	0.899468	0.368403
ANKRD46	57.0699	0.732706	0.44659	1.64067	0.100867
ANKRD49	278.361	0.274337	0.278147	0.986301	0.323986
ANKRD50	72.545	0.588685	0.419156	1.40445	0.160184
ANKRD52	280.408	-0.0728897	0.253084	-0.288006	0.773342
ANKRD54	302.119	-0.263453	0.261577	-1.00717	0.313852
ANKRD55	16.0944	0.410491	0.511362	0.80274	0.422125
ANKRD6	105.209	-0.149922	0.292914	-0.511832	0.608769
ANKRD63	16.2367	-0.0524736	0.523936	-0.100153	0.920223
ANKRD9	53.1383	-0.138037	0.4334	-0.318497	0.750108
ANKS1A	149.879	0.015765	0.25016	0.0630198	0.949751
ANKS3	235.962	-0.586408	0.552361	-1.06164	0.288399
ANKS6	473.396	-0.380522	0.289924	-1.31249	0.189356
ANKZF1	660.665	-0.540833	0.305306	-1.77144	0.0764868
ANLN	485.943	0.127973	0.263633	0.485422	0.627377
ANO10	36.6991	0.290783	0.438572	0.663021	0.507317
ANO5	38.0382	0.0716657	0.364303	0.19672	0.844046
ANO6	103.95	0.468906	0.408899	1.14675	0.251484
ANO8	78.2093	0.128344	0.54955	0.233543	0.81534
ANO9	180.844	-1.10685	0.569536	-1.94342	0.0519656
ANOS1	114.355	0.330113	0.318395	1.0368	0.299828
ANP32A	1318.62	0.251448	0.258096	0.974241	0.329937
ANP32AP1	13.0525	0.324036	0.720241	0.4499	0.652783
ANP32B	4790.49	0.211764	0.246884	0.857749	0.391031
ANP32E	740.719	0.321363	0.31599	1.017	0.309152
ANPEP	441.223	-0.597439	0.328623	-1.81801	0.0690628
ANTKMT	53.2107	0.203365	1.30292	0.156084	0.875967
ANTXR1	8.30958	1.34892	0.772387	1.74643	0.080737
ANTXR2	263.82	0.404164	0.345858	1.16859	0.242571
ANXA1	170.644	0.471134	0.339815	1.38644	0.165612
ANXA11	1168.84	0.179064	0.214187	0.836016	0.403146
ANXA2	280.229	0.423357	0.293932	1.44033	0.149775
ANXA2P2	11.6543	0.63761	0.684489	0.931512	0.351589
ANXA2R	266.855	-0.768689	0.39635	-1.93942	0.0524505
ANXA2R-AS1	67.8973	-0.334243	0.327868	-1.01944	0.307992
ANXA2R-OT1	70.2107	0.27501	0.297696	0.923795	0.355593
ANXA4	442.745	0.0912329	0.230366	0.396035	0.69208
ANXA5	987.389	0.521732	0.301502	1.73044	0.083551
ANXA6	188.536	-0.255504	0.247305	-1.03315	0.301532
ANXA7	283.014	0.446754	0.324579	1.37641	0.168694
ANXA8	26.6441	-0.661324	0.460227	-1.43695	0.150732
ANXA8_1	68.6974	-0.11247	0.345366	-0.325656	0.744685
ANXA8L1	19.1699	-0.764937	0.507775	-1.50645	0.131952
ANXA9	12.6999	-0.618228	0.594886	-1.03924	0.298694
AOAH	154.195	-0.413782	0.294088	-1.407	0.159427
AOC1	27.8487	-0.0316832	0.409224	-0.0774226	0.938287
AOC2	40.3912	-0.136976	0.360327	-0.380145	0.703838
AOC3	69.4091	-0.352908	0.359389	-0.981967	0.326116
AOPEP	63.5931	-0.0631362	0.309313	-0.204118	0.838262
AP1AR	78.8788	0.615933	0.500029	1.23179	0.218026
AP1B1	924.923	-0.463957	0.393589	-1.17879	0.238483
AP1G1	728.621	0.110877	0.237453	0.466944	0.64054
AP1G2	437.246	-0.233834	0.325632	-0.718093	0.4727
AP1G2-AS1	75.4228	-0.232121	0.309197	-0.75072	0.452821
AP1M1	206.101	-0.233641	0.387277	-0.603293	0.546314
AP1S1	354.979	0.251543	0.32276	0.779349	0.435774
AP1S2	759.299	0.70957	0.347692	2.0408	0.0412703
AP1S3	71.057	0.345161	0.370732	0.931025	0.35184
AP2A1	180.513	-0.477017	0.495657	-0.962393	0.335852
AP2A2	297.306	-0.540375	0.370716	-1.45765	0.144936
AP2A2_1	231.509	-0.47752	0.325309	-1.4679	0.142132
AP2A2_2	253.431	-0.531436	0.342382	-1.55218	0.12062
AP2B1	567.139	0.250352	0.271632	0.921658	0.356707
AP2M1	696.293	0.0493728	0.275991	0.178893	0.858022
AP2S1	779.573	-0.261827	0.417495	-0.627138	0.530568
AP3B1	211.396	0.514741	0.34241	1.50329	0.132765
AP3B2	83.9947	-0.293679	0.327832	-0.895823	0.370347
AP3D1	1425.62	-0.27764	0.345357	-0.803922	0.421442
AP3M1	262.77	0.47857	0.357352	1.33921	0.180502
AP3M2	176.522	0.0229878	0.257391	0.0893111	0.928835
AP3S1	443.133	0.682891	0.38903	1.75537	0.0791966
AP4B1	993.413	-0.632246	0.327423	-1.93098	0.0534859
AP4E1	62.1563	0.257336	0.343065	0.750109	0.453189
AP4M1	162.949	-0.412802	0.360282	-1.14577	0.251888
AP4S1	53.0635	0.42477	0.346278	1.22667	0.219946
AP5B1	531.33	-0.209386	0.251183	-0.833601	0.404506
AP5M1	243.379	0.436935	0.29761	1.46815	0.142065
AP5S1	31.6712	0.0945517	0.38794	0.243728	0.807442
AP5Z1	519.317	-0.727922	0.620858	-1.17244	0.241019
APAF1	140.749	0.691286	0.3479	1.98702	0.0469198
APBA2	121.21	-0.338687	0.399989	-0.84674	0.39714
APBA2_1	98.5565	-0.26934	0.434577	-0.619775	0.535406
APBA2_2	97.834	-0.262078	0.439896	-0.595773	0.551327
APBA3	79.3779	-0.236811	0.699717	-0.338439	0.735033
APBB1	35.2319	-0.185321	0.438922	-0.422219	0.672865
APBB1IP	238.992	0.0385022	0.259606	0.14831	0.882098
APBB2	91.733	-0.173264	0.28734	-0.602994	0.546513
APBB3	882.835	-0.462786	0.333117	-1.38926	0.164754
APC	224.376	0.21813	0.253369	0.860919	0.389283
APC2	9.61881	0.836283	0.811586	1.03043	0.302808
APEH	1149.26	-0.428825	0.321233	-1.33494	0.181898
APEX1	1349.7	-0.101255	0.220513	-0.459181	0.646104
APEX1_1	1328.08	-0.0925722	0.218362	-0.423938	0.671611
APEX2	319.535	-0.220105	0.215018	-1.02366	0.305996
APH1A	429.473	0.407078	0.353827	1.1505	0.249937
APH1B	28.4046	0.994063	0.526643	1.88754	0.0590871
API5	982.198	0.35151	0.289594	1.2138	0.224824
APIP	150.322	0.670762	0.39894	1.68136	0.0926931
APLF	18.7204	-0.0426219	0.51161	-0.0833094	0.933606
APLP2	6781.63	0.350955	0.280095	1.25299	0.210211
APMAP	339.92	0.000929498	0.211057	0.00440401	0.996486
APOBEC3A	28.9758	0.426423	0.669492	0.636935	0.524167
APOBEC3A_B	118.02	0.360001	0.466939	0.770981	0.440718
APOBEC3B	96.7982	0.291882	0.327345	0.891665	0.372572
APOBEC3C	182.018	0.315175	0.309188	1.01936	0.308031
APOBEC3D	26.3984	-0.729578	0.415975	-1.7539	0.0794483
APOBEC3F	23.306	0.429244	0.515711	0.832335	0.40522
APOBEC3G	100.339	0.190537	0.264368	0.720724	0.471079
APOBEC3H	29.2883	0.0279357	0.424665	0.0657829	0.947551
APOBR	1210.5	-0.527316	0.466673	-1.12995	0.258498
APOC1	205.479	0.617366	0.35171	1.75533	0.0792037
APOE	15.0982	1.10173	0.896289	1.22921	0.218992
APOL1	110.282	0.11557	0.30297	0.381456	0.702865
APOL2	346.876	-0.268926	0.250777	-1.07237	0.283554
APOL3	51.7315	-0.0693589	0.353968	-0.195947	0.844652
APOL6	195.188	0.191102	0.275211	0.694382	0.487442
APOLD1	143.357	-0.211569	0.297448	-0.711282	0.47691
APOM	32.1248	0.0478858	0.405889	0.117978	0.906085
APOM_1	32.4467	0.0453436	0.401576	0.112914	0.910099
APOM_2	32.1248	0.0478858	0.405889	0.117978	0.906085
APOM_3	31.9164	0.0290184	0.402329	0.0721259	0.942502
APOM_4	32.1248	0.0478858	0.405889	0.117978	0.906085
APOM_5	32.1248	0.0478858	0.405889	0.117978	0.906085
APOM_6	32.1248	0.0478858	0.405889	0.117978	0.906085
APOO	154.915	0.53835	0.379446	1.41878	0.155963
APOOL	68.1901	0.578401	0.354972	1.62943	0.103222
APP	423.983	0.665538	0.359402	1.85179	0.0640557
APPAT	144.68	0.247476	0.308812	0.801379	0.422912
APPAT_1	160.131	0.280775	0.309201	0.908067	0.363843
APPBP2	134.053	0.522939	0.343222	1.52361	0.127605
APPL1	214.114	0.324108	0.297077	1.09099	0.275276
APPL2	97.3551	0.0182306	0.268219	0.0679691	0.94581
APRG1	15.1386	-0.178325	0.588462	-0.303036	0.761863
APRT	323.673	-0.250471	0.385948	-0.648976	0.516354
APTR	360.413	-0.366315	0.232371	-1.57642	0.114928
APTX	397.023	-0.251325	0.242717	-1.03547	0.300452
AQP3	9.72096	0.653901	0.664003	0.984786	0.324729
AQR	140.018	0.251641	0.272324	0.92405	0.355461
ARAF	854.642	-0.626464	0.358179	-1.74902	0.0802868
ARAP1	3257.58	-0.715298	0.431686	-1.65699	0.0975224
ARAP2	28.3565	0.937452	0.472299	1.98487	0.0471588
ARAP3	1130.91	-0.608021	0.332652	-1.8278	0.06758
ARCN1	424.983	0.544022	0.363437	1.49688	0.134424
AREL1	525.091	-0.0944984	0.233658	-0.40443	0.685896
ARF1	1753.35	0.406421	0.297686	1.36527	0.172169
ARF3	85.7567	-0.0566579	0.388368	-0.145887	0.88401
ARF4	526.346	0.744122	0.42662	1.74423	0.0811197
ARF4-AS1	12.3848	-0.632736	0.606922	-1.04253	0.297165
ARF5	158.228	-0.425127	0.449028	-0.946772	0.343755
ARF6	939.744	0.569728	0.309243	1.84233	0.0654267
ARFGAP1	1487.37	-1.02202	0.591307	-1.72842	0.0839138
ARFGAP2	1301.75	-0.396742	0.302883	-1.30989	0.190234
ARFGAP3	198.15	0.592326	0.295242	2.00624	0.0448309
ARFGEF1	297.123	0.239988	0.257523	0.931912	0.351382
ARFGEF2	182.559	0.42125	0.271333	1.55252	0.120537
ARFIP1	43.8914	0.21902	0.43292	0.505913	0.612918
ARFIP2	592.468	-0.159537	0.228936	-0.696863	0.485888
ARFRP1	454.694	-0.597616	0.640199	-0.933484	0.35057
ARG2	10.9118	0.40487	0.69058	0.586276	0.55769
ARGLU1	5548.68	-0.233896	0.282755	-0.827202	0.408123
ARHGAP1	327.833	-0.28232	0.275195	-1.02589	0.304942
ARHGAP10	26.0868	0.1281	0.49421	0.259201	0.79548
ARHGAP11A	360.073	0.267665	0.279803	0.956621	0.338759
ARHGAP11A_1	349.226	0.274916	0.279664	0.983025	0.325595
ARHGAP11A_2	372.118	0.288788	0.28097	1.02782	0.304033
ARHGAP11A_3	349.226	0.274916	0.279664	0.983025	0.325595
ARHGAP11B	68.6158	0.00922589	0.301902	0.0305592	0.975621
ARHGAP11B_1	73.7292	0.115702	0.296944	0.389641	0.696802
ARHGAP11B_2	78.046	-0.00439751	0.287115	-0.0153162	0.98778
ARHGAP11B_3	73.625	0.111676	0.296578	0.376548	0.706509
ARHGAP11B-DT	9.49977	-0.401453	0.679917	-0.590445	0.554892
ARHGAP11B-DT_1	10.7881	-0.328181	0.642961	-0.510421	0.609756
ARHGAP11B-DT_3	10.7881	-0.328181	0.642961	-0.510421	0.609756
ARHGAP12	321.874	0.302451	0.273195	1.10709	0.268256
ARHGAP15	356.977	0.507391	0.321366	1.57886	0.114369
ARHGAP17	677.962	-0.236175	0.225207	-1.0487	0.294315
ARHGAP17_1	669.156	-0.240927	0.227448	-1.05926	0.28948
ARHGAP18	68.6014	0.541524	0.327465	1.65368	0.0981919
ARHGAP19	94.545	0.164639	0.336989	0.488557	0.625155
ARHGAP21	97.3962	0.0217333	0.285341	0.076166	0.939287
ARHGAP22	21.0438	-0.695964	0.504054	-1.38073	0.167361
ARHGAP23	24.6585	-0.164083	0.450801	-0.363981	0.715872
ARHGAP23_1	24.9268	-0.211109	0.445465	-0.473907	0.635566
ARHGAP25	154.812	0.372614	0.252931	1.47319	0.140701
ARHGAP26	399.287	-0.23253	0.253266	-0.918125	0.358554
ARHGAP27	646.593	-0.474492	0.348612	-1.36109	0.173485
ARHGAP27_1	590.994	-0.429251	0.338321	-1.26877	0.204524
ARHGAP27_2	638.496	-0.474964	0.349865	-1.35757	0.174602
ARHGAP27P1	56.57	-0.337282	0.568466	-0.593318	0.552968
ARHGAP27P1-BPTFP1-KPNA2P3	805.16	-0.163836	0.260232	-0.629577	0.528971
ARHGAP30	529.713	0.244845	0.249669	0.98068	0.326751
ARHGAP31	26.9223	0.562633	0.49643	1.13336	0.257063
ARHGAP32	57.1259	0.342074	0.421973	0.810652	0.417566
ARHGAP33	98.6149	-0.481391	0.443502	-1.08543	0.277731
ARHGAP35	137.485	0.391334	0.251325	1.55708	0.119451
ARHGAP4	2913.5	-0.414866	0.614098	-0.675569	0.499315
ARHGAP42	11.6452	0.312879	0.640471	0.488514	0.625186
ARHGAP44	9.68338	0.172318	0.641488	0.268623	0.78822
ARHGAP45	3237.96	-0.610301	0.618108	-0.987369	0.323462
ARHGAP9	2029.04	-0.577927	0.330655	-1.74782	0.0804947
ARHGDIA	1524.5	-0.118378	0.587271	-0.201573	0.840251
ARHGDIB	6491.69	0.362387	0.31803	1.13947	0.254506
ARHGEF1	2342.53	-0.778442	0.579126	-1.34417	0.178894
ARHGEF10	126.027	-0.189834	0.262914	-0.722035	0.470273
ARHGEF10_1	125.78	-0.179115	0.262797	-0.681573	0.495509
ARHGEF10L	39.6625	-0.406921	0.501813	-0.810902	0.417422
ARHGEF11	182.038	-0.134365	0.298249	-0.450512	0.652341
ARHGEF16	47.3701	-0.573974	0.620403	-0.925163	0.354881
ARHGEF17	66.8417	-0.701968	0.333797	-2.10298	0.0354677
ARHGEF18	444.214	-0.012724	0.350454	-0.0363071	0.971038
ARHGEF19	89.7637	-0.637159	0.390574	-1.63134	0.102819
ARHGEF19_1	92.0196	-0.680593	0.39102	-1.74056	0.0817612
ARHGEF2	1554.55	-0.126876	0.219761	-0.577335	0.563713
ARHGEF25	167.616	-0.513105	0.295587	-1.73588	0.0825842
ARHGEF2-AS2	60.0603	0.188102	0.347595	0.541154	0.588401
ARHGEF3	367.413	0.368305	0.272025	1.35394	0.175757
ARHGEF39	344.291	-0.222015	0.219282	-1.01246	0.311317
ARHGEF40	153.006	0.00302953	0.274959	0.0110181	0.991209
ARHGEF6	1011.01	0.346051	0.268589	1.2884	0.197605
ARHGEF7	897.652	-0.232482	0.278911	-0.833533	0.404544
ARHGEF9	76.8613	-0.435167	0.359716	-1.20975	0.226374
ARID1A	928.176	0.0471568	0.188366	0.250347	0.802319
ARID1B	271.416	0.0474492	0.238458	0.198983	0.842276
ARID2	363.804	0.158286	0.253222	0.625087	0.531914
ARID3A	1060.23	-0.221385	0.26153	-0.846501	0.397274
ARID3B	58.9349	0.109185	0.40054	0.272594	0.785165
ARID3C	9.40348	0.285474	0.764095	0.373611	0.708694
ARID4A	163.757	0.054223	0.273321	0.198386	0.842743
ARID4B	277.658	0.0205072	0.258383	0.0793677	0.93674
ARID5A	171.626	-0.605669	0.563097	-1.0756	0.282105
ARIH1	237.446	0.368596	0.249153	1.4794	0.139035
ARIH2	2862.05	-0.264138	0.220684	-1.19691	0.231343
ARIH2OS	12.481	-0.750759	0.594835	-1.26213	0.206902
ARK2C	143.846	-0.358686	0.288743	-1.24223	0.21415
ARK2N	123.534	0.458649	0.339251	1.35195	0.176392
ARL1	192.663	0.666088	0.320956	2.07533	0.0379564
ARL11	222.798	0.369104	0.29623	1.24601	0.212762
ARL13B	19.6382	1.20023	0.539052	2.22656	0.0259764
ARL14EP	195.454	0.014313	0.249464	0.057375	0.954247
ARL15	81.408	-0.184515	0.360148	-0.51233	0.60842
ARL16	854.35	-0.550301	0.313594	-1.75482	0.0792897
ARL17A	430.333	-0.153239	0.207437	-0.738725	0.460074
ARL17A_1	580.18	-0.172625	0.226766	-0.761249	0.446508
ARL17B	354.961	-0.144703	0.210304	-0.688068	0.49141
ARL2	137.188	0.265604	0.470651	0.564333	0.572528
ARL2BP	119.855	0.491644	0.348888	1.40917	0.158784
ARL3	29.2884	0.56883	0.458721	1.24004	0.214962
ARL4A	179.526	0.135853	0.265413	0.511853	0.608754
ARL4C	14.5073	0.1552	0.586758	0.264505	0.791391
ARL4D	25.5198	0.174839	0.439178	0.398105	0.690552
ARL5A	291.658	0.448476	0.307175	1.46	0.144289
ARL5B	41.3311	0.510517	0.446683	1.14291	0.253078
ARL5C	35.0168	-1.70299	0.540127	-3.15295	0.0016163
ARL6IP1	1667.43	1.12733	0.489611	2.30251	0.0213066
ARL6IP4	1021.52	-0.188336	0.415288	-0.453507	0.650184
ARL6IP5	326.922	0.701335	0.371214	1.8893	0.0588515
ARL6IP6	108.661	0.60789	0.389727	1.55979	0.118811
ARL8A	192.072	0.393139	0.468668	0.838844	0.401557
ARL8B	873.352	0.467108	0.292636	1.59621	0.110442
ARMC1	225.609	0.559621	0.354343	1.57932	0.114263
ARMC10	156.68	0.410911	0.313727	1.30977	0.190273
ARMC10_1	149.151	0.396467	0.317278	1.24959	0.21145
ARMC12	26.8417	-0.733253	0.566543	-1.29426	0.195576
ARMC2	11.5812	0.13665	0.652496	0.209426	0.834116
ARMC5	219.221	-0.0899214	0.44337	-0.202813	0.839281
ARMC6	231.958	-0.073563	0.484354	-0.151878	0.879283
ARMC7	66.4133	-0.0386444	0.305094	-0.126664	0.899206
ARMC8	476.369	0.0611704	0.23078	0.265059	0.790964
ARMC9	63.0444	-0.281122	0.327429	-0.858571	0.390577
ARMCX3	186.337	0.220206	0.316337	0.696112	0.486359
ARMCX4	17.8931	0.0801008	0.551191	0.145323	0.884456
ARMCX5	58.664	0.313434	0.328359	0.954549	0.339806
ARMCX6	377.511	-0.260272	0.2267	-1.14809	0.250931
ARMH1	707.866	-0.632875	0.412327	-1.53489	0.124812
ARMH3	201.303	-0.0288376	0.221577	-0.130147	0.89645
ARMT1	76.365	0.754478	0.43629	1.7293	0.0837549
ARNT	312.41	0.147632	0.234016	0.630862	0.528131
ARPC1A	870.477	0.14439	0.23778	0.607243	0.54369
ARPC1B	1311.07	0.381451	0.313106	1.21828	0.223118
ARPC2	4174.71	0.0463049	0.212021	0.218398	0.827119
ARPC3	2095.8	0.398717	0.318159	1.2532	0.210133
ARPC4	1907.92	-0.405939	0.373423	-1.08708	0.277003
ARPC5	1383.47	0.557694	0.355561	1.56849	0.116767
ARPC5L	956.053	0.116294	0.197548	0.588687	0.556072
ARPP19	236.639	0.334282	0.248129	1.34721	0.177913
ARRB1	314.221	-0.0001042	0.236291	-0.000440982	0.999648
ARRB2	1973.62	-0.317826	0.246182	-1.29102	0.196696
ARRDC1	607.815	-0.279114	0.612527	-0.455676	0.648623
ARRDC1-AS1	230.192	-0.14277	0.424176	-0.336583	0.736432
ARRDC2	850.932	-0.648259	0.346219	-1.8724	0.0611516
ARRDC3	55.4785	0.501086	0.440955	1.13636	0.255804
ARRDC4	40.503	0.20334	0.442284	0.45975	0.645695
ARSA	231.138	-0.417832	0.504894	-0.827564	0.407918
ARSB	89.4553	0.748796	0.410144	1.82569	0.0678965
ARSD	197.702	-0.153203	0.256361	-0.597606	0.550103
ARSG	97.4114	-0.202173	0.282741	-0.715046	0.47458
ARSK	18.5697	0.585781	0.567591	1.03205	0.30205
ART3	53.3023	-0.359835	0.401802	-0.895553	0.370492
ARTN	59.2608	-0.927662	0.504835	-1.83756	0.0661279
ARV1	121.953	0.630684	0.429939	1.46691	0.142399
ARVCF	43.1057	-0.623836	0.548019	-1.13835	0.254976
ASAH1	319.675	0.494153	0.256853	1.92387	0.0543705
ASAP1	374.643	0.309111	0.247023	1.25135	0.210808
ASAP1-IT2	10.5318	-0.372155	0.610222	-0.609869	0.541949
ASB1	97.7447	0.161161	0.287009	0.561517	0.574445
ASB13	109.384	-0.187505	0.268189	-0.699151	0.484458
ASB14	11.1092	-0.0585178	0.625995	-0.0934798	0.925522
ASB16	10.0905	-0.206842	0.604575	-0.342127	0.732255
ASB16-AS1	210.832	-0.215272	0.297577	-0.723415	0.469425
ASB2	551.418	-0.455849	0.313755	-1.45288	0.146256
ASB2_1	541.556	-0.460358	0.314704	-1.46283	0.143514
ASB3	51.9804	-0.422573	0.379308	-1.11406	0.265252
ASB6	499.371	-0.466307	0.302907	-1.53944	0.123697
ASB7	45.3199	0.203038	0.368754	0.550606	0.581904
ASB8	160.481	0.240916	0.252369	0.954618	0.339771
ASCC1	125.605	0.271537	0.323789	0.838623	0.401681
ASCC2	765.826	-0.388496	0.384021	-1.01165	0.311704
ASCC3	174.737	0.463338	0.346597	1.33682	0.18128
ASCL2	187.055	-0.3786	0.316662	-1.1956	0.231854
ASF1A	258.711	0.562285	0.365292	1.53928	0.123737
ASF1B	406.565	0.0158759	0.291259	0.0545078	0.956531
ASF1B_1	402.083	0.0024092	0.292947	0.00822402	0.993438
ASGR1	68.6071	-0.90152	0.499575	-1.80457	0.0711417
ASGR2	672.622	-0.744984	0.392207	-1.89947	0.0575033
ASH1L	161.94	0.155911	0.247181	0.630759	0.528198
ASH1L-AS1	87.8162	-0.524869	0.365443	-1.43625	0.15093
ASH2L	834.636	0.150808	0.237937	0.633815	0.526201
ASIC1	37.7335	-0.0966231	0.36977	-0.261306	0.793857
ASIC3	32.9271	-1.01299	0.521558	-1.94223	0.052109
ASL	245.39	-0.643937	0.422681	-1.52346	0.127643
ASMER1	13.3478	-0.0171062	0.572727	-0.029868	0.976172
ASMTL	261.103	-0.579011	0.377334	-1.53448	0.124912
ASMTL_1	266.006	-0.563965	0.373329	-1.51064	0.130881
ASMTL-AS1	478.216	-0.757629	0.426068	-1.77819	0.0753731
ASMTL-AS1_1	486.751	-0.750817	0.424534	-1.76857	0.0769661
ASNSD1	172.773	0.263435	0.318125	0.828086	0.407622
ASPH	96.2221	0.32685	0.315991	1.03437	0.300965
ASPHD2	16.1492	0.233138	0.590063	0.395106	0.692765
ASPM	602.507	0.226171	0.264665	0.854557	0.392797
ASPRV1	19.3917	-0.20438	0.559128	-0.365533	0.714713
ASPSCR1	288.593	-0.34396	0.633803	-0.542692	0.587342
ASRGL1	479.09	-0.023584	0.209057	-0.112811	0.91018
ASS1	42.0971	0.883151	0.358329	2.46464	0.0137152
ASTE1	59.4695	-0.209753	0.363032	-0.577781	0.563412
ASXL1	744.622	-0.27276	0.2262	-1.20584	0.22788
ASXL2	183.903	0.446045	0.282212	1.58053	0.113985
ATAD1	425.508	0.326396	0.280262	1.16461	0.244176
ATAD2	608.88	0.333438	0.2646	1.26016	0.207611
ATAD2B	144.746	0.173541	0.272655	0.636486	0.524459
ATAD3A	242.743	-0.281266	0.721224	-0.389984	0.696548
ATAD3B	490.274	-0.891296	0.677377	-1.3158	0.18824
ATAD5	262.202	0.141516	0.260481	0.543289	0.586931
ATAT1	103.733	0.223706	0.285717	0.782966	0.433647
ATAT1_1	103.608	0.252303	0.285092	0.88499	0.376162
ATAT1_2	104.031	0.244618	0.283234	0.863662	0.387773
ATAT1_3	103.837	0.226447	0.284899	0.794831	0.426712
ATAT1_4	103.382	0.233169	0.286443	0.814016	0.415636
ATAT1_5	104.139	0.247432	0.283958	0.871369	0.383553
ATAT1_6	104.031	0.244618	0.283234	0.863662	0.387773
ATE1	132.004	0.158491	0.317312	0.499481	0.61744
ATF1	101.56	0.124337	0.313583	0.396504	0.691733
ATF2	198.259	0.385144	0.305084	1.26242	0.206798
ATF3	14.621	0.389805	0.515236	0.756556	0.449316
ATF4	4628.05	0.143094	0.190168	0.752458	0.451775
ATF5	195.374	0.338515	0.267446	1.26573	0.205609
ATF6	293.359	0.121944	0.275879	0.44202	0.658475
ATF6B	688.153	0.168845	0.258923	0.652105	0.514333
ATF6B_1	680.53	0.177767	0.261258	0.680427	0.496234
ATF6B_2	496.136	0.190178	0.314872	0.603985	0.545853
ATF6B_3	580.725	0.190636	0.297935	0.639858	0.522265
ATF7	70.3458	0.322013	0.446999	0.720389	0.471285
ATF7IP	145.702	0.21499	0.298065	0.721286	0.470734
ATF7IP2	573.002	-0.447006	0.307503	-1.45367	0.146039
ATG10	43.273	0.360489	0.363799	0.990901	0.321734
ATG101	267.522	-0.183493	0.26049	-0.704416	0.481174
ATG12	381.627	0.106418	0.230378	0.461928	0.644133
ATG13	624.459	0.0634304	0.204958	0.30948	0.756957
ATG14	311.809	-0.27073	0.26612	-1.01732	0.309
ATG16L1	541.036	-0.0498684	0.227512	-0.219191	0.826502
ATG16L1_1	548.984	-0.0522526	0.227922	-0.229257	0.818669
ATG16L2	2340.94	-0.749307	0.427955	-1.7509	0.0799628
ATG2A	179.924	-0.481625	0.650932	-0.7399	0.45936
ATG2B	346.003	-0.0745087	0.240541	-0.309755	0.756747
ATG3	399.059	0.466934	0.328481	1.42149	0.155173
ATG4A	199.426	-0.187057	0.294323	-0.635553	0.525068
ATG4B	782.55	-0.421695	0.428167	-0.984884	0.324681
ATG4C	94.6209	0.268756	0.338145	0.794797	0.426732
ATG4D	134.77	-0.0885724	0.557476	-0.158881	0.873763
ATG5	224.275	0.362418	0.279283	1.29767	0.1944
ATG7	471.799	-0.525126	0.298993	-1.75632	0.0790341
ATG9A	218.771	-0.338433	0.384349	-0.880536	0.378569
ATIC	829.428	0.104663	0.207637	0.50407	0.614212
ATL1	8.63396	1.27362	0.757397	1.68157	0.0926514
ATL2	880.938	0.120094	0.238718	0.503079	0.614909
ATL3	282.65	0.35361	0.341182	1.03643	0.300002
ATM	344.106	0.321825	0.309585	1.03954	0.298555
ATMIN	250.792	0.000586895	0.229509	0.00255718	0.99796
ATMIN_1	245.472	0.0177887	0.233312	0.0762443	0.939225
ATN1	392.054	-0.477426	0.47026	-1.01524	0.309993
ATOH8	9.55797	0.659884	0.682979	0.966185	0.333952
ATOSA	89.5888	0.201766	0.399853	0.504602	0.613839
ATOSB	358.714	-0.321423	0.323977	-0.992117	0.32114
ATOX1	326.057	0.10627	0.323961	0.328032	0.742887
ATP10A	210.398	-0.216512	0.27443	-0.788951	0.430141
ATP10D	49.8079	0.404918	0.386684	1.04715	0.295029
ATP11A	191.35	0.289776	0.297167	0.975128	0.329497
ATP11B	321.832	0.629877	0.369039	1.7068	0.0878587
ATP11C	117.165	0.4242	0.319995	1.32565	0.184957
ATP13A1	1049.84	-0.503103	0.499077	-1.00807	0.313423
ATP13A2	52.0651	-0.24258	0.611237	-0.396868	0.691465
ATP13A2_1	52.0331	-0.240545	0.614415	-0.391502	0.695426
ATP13A3	463.509	0.727328	0.351519	2.0691	0.0385366
ATP13A4	48.151	0.0409753	0.32858	0.124704	0.900758
ATP1A1	1015.75	0.251226	0.258369	0.972351	0.330876
ATP1A3	90.1751	-0.0343237	0.309669	-0.11084	0.911743
ATP1B3	2189.39	0.163362	0.238366	0.685342	0.493128
ATP23	264.405	0.308056	0.292832	1.05199	0.292804
ATP23_1	259.627	0.292903	0.296499	0.987872	0.323216
ATP2A1	189.476	-0.598635	0.376823	-1.58864	0.112142
ATP2A1-AS1	18.2351	-0.0111811	0.514972	-0.021712	0.982678
ATP2A2	903.547	0.66223	0.396872	1.66862	0.0951918
ATP2A3	3180.18	-0.600476	0.401043	-1.49729	0.134319
ATP2B1	201.027	0.180774	0.305283	0.592153	0.553748
ATP2B4	463.062	0.14029	0.226954	0.618145	0.53648
ATP2C1	677.651	0.345886	0.264555	1.30743	0.191068
ATP5F1A	3745.24	0.319281	0.266406	1.19848	0.230732
ATP5F1B	2615.41	-0.0551538	0.272515	-0.202388	0.839613
ATP5F1C	836.45	0.359191	0.298217	1.20446	0.228411
ATP5F1D	313.65	-0.200435	1.14559	-0.174962	0.861109
ATP5F1E	211.652	0.593642	0.534428	1.1108	0.266655
ATP5IF1	650.02	0.450617	0.336597	1.33875	0.180654
ATP5IF1_1	635.283	0.463652	0.34019	1.36292	0.172908
ATP5MC1	562.081	0.365957	0.2998	1.22067	0.222211
ATP5MC2	2812.85	0.358967	0.292976	1.22524	0.220484
ATP5MC3	721.342	0.463203	0.37207	1.24494	0.213156
ATP5ME	2749.55	-0.669667	0.286237	-2.33956	0.0193066
ATP5MF	1134.19	0.453793	0.339819	1.3354	0.181747
ATP5MG	1878.73	0.552468	0.363842	1.51843	0.128906
ATP5MJ	1679.69	0.165619	0.272078	0.60872	0.54271
ATP5MK	687.183	0.522497	0.362262	1.44232	0.149213
ATP5PB	2515.52	0.59984	0.344745	1.73995	0.0818673
ATP5PD	1389.89	0.555093	0.335145	1.65628	0.0976652
ATP5PF	1488.05	0.492471	0.346968	1.41936	0.155796
ATP5PO	1245.01	0.260312	0.308504	0.843788	0.398788
ATP6	764435	-1.61797	0.509429	-3.17604	0.00149301
ATP6AP1	842.448	-0.220521	0.222868	-0.989471	0.322433
ATP6AP1-DT	122.181	-0.343074	0.275226	-1.24652	0.212575
ATP6AP1L	56.3456	-0.202941	0.324546	-0.625307	0.53177
ATP6AP2	614.871	0.68294	0.434094	1.57325	0.11566
ATP6V0A1	488.354	-0.146377	0.374448	-0.390915	0.69586
ATP6V0A2	270.339	0.390307	0.258522	1.50976	0.131104
ATP6V0B	1980.02	-0.258199	0.264473	-0.976275	0.328928
ATP6V0C	806.111	0.175354	0.346478	0.506104	0.612784
ATP6V0D1	308.936	-0.19038	0.231194	-0.823464	0.410244
ATP6V0D1-DT	21.9279	0.454024	0.45992	0.987181	0.323554
ATP6V0E1	567.975	0.239583	0.321841	0.744414	0.456626
ATP6V0E2	88.9115	-0.0744455	0.398191	-0.186959	0.851693
ATP6V0E2-AS1	31.9512	-0.35396	0.430103	-0.822966	0.410527
ATP6V1A	443.069	0.625731	0.304661	2.05386	0.0399895
ATP6V1B1	20.4563	-0.297318	0.545448	-0.54509	0.585691
ATP6V1B2	630.392	0.283773	0.257637	1.10145	0.270702
ATP6V1C1	254.625	0.10101	0.268259	0.37654	0.706515
ATP6V1C2	20.4391	0.56022	0.51293	1.0922	0.274747
ATP6V1D	211.596	0.453074	0.328948	1.37734	0.168407
ATP6V1E1	683.226	0.283016	0.253468	1.11658	0.264175
ATP6V1E2	48.0456	-0.261027	0.338679	-0.770721	0.440872
ATP6V1F	198.278	0.351034	0.325345	1.07896	0.280605
ATP6V1G1	409.629	0.354542	0.241651	1.46716	0.142331
ATP6V1G2	31.7168	0.397104	0.48005	0.827213	0.408116
ATP6V1G2_1	28.9282	0.368568	0.485764	0.758738	0.448009
ATP6V1G2_2	31.6082	0.388613	0.482202	0.805913	0.420293
ATP6V1G2_3	31.6082	0.388613	0.482202	0.805913	0.420293
ATP6V1G2_4	31.6082	0.388613	0.482202	0.805913	0.420293
ATP6V1G2_5	31.6082	0.388613	0.482202	0.805913	0.420293
ATP6V1G2_6	31.6082	0.388613	0.482202	0.805913	0.420293
ATP6V1H	338.163	0.352481	0.266454	1.32286	0.185883
ATP7A	12.8587	0.569333	0.606078	0.939373	0.34754
ATP7B	8.01137	1.09973	0.833404	1.31957	0.186979
ATP8	155561	-1.5848	0.50431	-3.14251	0.00167508
ATP8A1	135.138	-0.118124	0.280874	-0.42056	0.674077
ATP8B1-AS1	24.3667	-0.0873113	0.427528	-0.204224	0.838179
ATP8B2	169.914	0.25427	0.265936	0.956133	0.339005
ATP8B3	133.826	-0.513589	0.345853	-1.48499	0.137547
ATP8B4	1232.1	0.176536	0.233201	0.757013	0.449042
ATP8B5P	15.4047	0.639845	0.638656	1.00186	0.316411
ATP9A	40.315	-0.0606461	0.40469	-0.149858	0.880877
ATP9B	161.713	-0.514354	0.407469	-1.26231	0.206836
ATPAF1	195.38	0.250718	0.302024	0.830126	0.406468
ATPAF2	191.242	-0.394055	0.384205	-1.02564	0.305062
ATPSCKMT	302.711	0.3656	0.261299	1.39916	0.161764
ATR	843.14	-0.0281599	0.23575	-0.119449	0.90492
ATRAID	455.161	0.285444	0.278077	1.02649	0.304659
ATRN	152.233	0.30412	0.280247	1.08518	0.27784
ATRX	305.542	-0.468492	0.407992	-1.14829	0.250849
ATXN1	164.204	0.151428	0.266643	0.567904	0.5701
ATXN10	830.018	0.662765	0.348582	1.90132	0.0572601
ATXN1-AS1	73.2621	-0.180822	0.299189	-0.604374	0.545595
ATXN1L	148.041	0.426314	0.311025	1.37067	0.170476
ATXN2	191.399	0.173535	0.279589	0.620678	0.534812
ATXN2L	728.272	0.363081	0.373752	0.971447	0.331326
ATXN3	137.113	0.25525	0.270391	0.944003	0.345168
ATXN7	143.058	0.257776	0.278983	0.923984	0.355495
ATXN7L1	22.4478	-0.291398	0.438158	-0.665052	0.506017
ATXN7L2	166.485	-0.56654	0.452089	-1.25316	0.210147
ATXN7L3	551.209	-0.167199	0.278388	-0.600597	0.548109
ATXN7L3-AS1	42.3629	0.15125	0.420514	0.359679	0.719087
ATXN7L3B	424.379	0.475678	0.329452	1.44385	0.148782
AUH	82.2458	0.472555	0.379993	1.24359	0.213651
AUNIP	87.3419	0.543482	0.378328	1.43653	0.15085
AUP1	6102.96	-0.642821	0.340585	-1.8874	0.0591059
AURKA	673.884	-0.107612	0.195752	-0.549739	0.582498
AURKAIP1	994.426	-0.437466	0.473155	-0.924572	0.355189
AURKAP1	41.1046	-0.446782	0.370793	-1.20494	0.228228
AURKB	967.033	-0.522148	0.308834	-1.6907	0.0908934
AURKC	15.3291	-0.856222	0.512878	-1.66945	0.0950289
AVEN	57.7559	0.504282	0.384244	1.3124	0.189385
AVIL	84.1417	-0.0631724	0.304687	-0.207335	0.835748
AVL9	245.296	0.521855	0.357178	1.46105	0.144001
AVPI1	24.4376	0.136075	0.477159	0.285178	0.775508
AXIN1	330.334	-0.621156	0.475962	-1.30505	0.191875
AZI2	57.8666	0.557546	0.393709	1.41614	0.156735
AZIN1	513.736	0.562314	0.28633	1.96387	0.0495454
AZIN2	66.062	-0.228142	0.371992	-0.613299	0.539678
AZU1	974.931	0.814328	1.29854	0.627111	0.530587
AZU1_1	955.746	0.829073	1.32281	0.626754	0.530821
B2M	2412.9	0.900899	0.496211	1.81556	0.0694384
B2M_1	1987.75	0.893528	0.484917	1.84264	0.0653814
B3GALNT1	125.744	0.726372	0.352185	2.06247	0.0391626
B3GALNT2	236.721	0.179921	0.244859	0.734797	0.462463
B3GALNT2_1	232.624	0.170782	0.249524	0.684432	0.493702
B3GALT6	77.7853	0.329006	0.383362	0.858212	0.390775
B3GALT9	61.8381	0.0216273	0.330081	0.0655211	0.947759
B3GAT3	429.988	-0.331456	0.490587	-0.675631	0.499275
B3GLCT	203.087	0.496034	0.311538	1.59221	0.111337
B3GNT2	111.335	0.700599	0.362902	1.93055	0.0535393
B3GNT5	42.9566	0.26264	0.447495	0.586911	0.557263
B3GNT7	48.5064	0.314039	0.440602	0.712751	0.476
B3GNT8	106.741	-0.0863828	0.666835	-0.129541	0.896929
B3GNT9	22.195	0.00597162	0.496095	0.0120373	0.990396
B3GNTL1	473.651	-0.441914	0.342551	-1.29007	0.197027
B3GNTL1_1	260.89	-0.577452	0.36133	-1.59813	0.110014
B4GALNT1	93.8654	-0.312536	0.292717	-1.06771	0.285652
B4GALNT3	82.5256	-0.109352	0.38427	-0.284572	0.775972
B4GALT1	399.23	0.397075	0.27333	1.45274	0.146297
B4GALT2	232.401	-0.537142	0.352483	-1.52388	0.127539
B4GALT3	350.969	-0.210105	0.253135	-0.830012	0.406532
B4GALT4	112.771	0.477343	0.312025	1.52982	0.126061
B4GALT5	704.087	0.285706	0.299173	0.954985	0.339585
B4GALT6	58.2035	0.478608	0.392085	1.22068	0.222209
B4GALT7	217.654	-0.597593	0.483415	-1.23619	0.216387
B4GAT1	100.744	0.096925	0.312303	0.310356	0.75629
B9D1	26.5468	0.054235	0.466379	0.11629	0.907423
B9D2	35.334	-0.00817659	0.454612	-0.0179859	0.98565
BABAM1	1523.93	-0.283362	0.261732	-1.08264	0.278967
BABAM2	209.058	-0.000836246	0.237918	-0.00351485	0.997196
BABAM2-AS1	27.1638	0.0203616	0.423434	0.048087	0.961647
BACE1	143.735	-0.166326	0.260242	-0.63912	0.522745
BACH1	88.2276	0.455066	0.323509	1.40666	0.15953
BAD	66.7089	0.247166	0.623204	0.396605	0.691658
BAG1	799.346	0.0936866	0.185596	0.504789	0.613707
BAG2	83.0736	0.556478	0.314828	1.76756	0.0771347
BAG3	200.387	0.327831	0.238746	1.37314	0.169709
BAG4	226.997	0.482498	0.358026	1.34766	0.177768
BAG5	448.138	-0.195238	0.217215	-0.898822	0.368747
BAG6	1977.49	-0.206425	0.266922	-0.773352	0.439314
BAG6_1	1549.34	-0.19546	0.287079	-0.680857	0.495962
BAG6_2	1973.54	-0.196073	0.268588	-0.730016	0.46538
BAG6_3	1975.86	-0.197047	0.268561	-0.733714	0.463123
BAG6_4	1977.36	-0.196113	0.268163	-0.731319	0.464584
BAG6_5	1553.27	-0.198896	0.2874	-0.692052	0.488905
BAG6_6	1549.59	-0.19628	0.287331	-0.683115	0.494534
BAHCC1	102.243	-0.0690945	0.379524	-0.182056	0.855539
BAHCC1_1	105.799	-0.0788469	0.370298	-0.212928	0.831383
BAHD1	112.639	-0.122296	0.283887	-0.43079	0.666621
BAIAP2	143.669	-0.544141	0.446815	-1.21782	0.223292
BAIAP2-DT	130.973	0.1065	0.257684	0.413297	0.679389
BAIAP2L1	62.7299	-1.01402	0.353537	-2.86822	0.00412794
BAIAP2L2	34.6349	-0.542022	0.61836	-0.876547	0.380732
BAK1	117.48	-0.0251633	0.287198	-0.0876165	0.930181
BAMBI	77.203	-0.124279	0.287365	-0.432477	0.665395
BANF1	1547.63	0.351855	0.299644	1.17424	0.240298
BANP	315.355	-0.541168	0.346202	-1.56315	0.118016
BAP1	959.34	-0.454169	0.321511	-1.41261	0.157771
BARD1	113.784	0.503098	0.352292	1.42807	0.153272
BARX1	94.8484	-0.512125	0.581112	-0.881285	0.378164
BASP1	1170.6	0.525899	0.347683	1.51258	0.130386
BATF	50.8097	0.163898	0.650137	0.252098	0.800965
BATF2	12.8494	-0.112756	0.545796	-0.20659	0.83633
BATF3	51.669	-0.347941	0.403776	-0.861717	0.388843
BAX	695.608	0.067666	0.346496	0.195287	0.845169
BAZ1A	3928.59	-0.965925	0.510062	-1.89374	0.0582595
BAZ1A-AS1	24.9404	0.62476	0.467959	1.33507	0.181852
BAZ1B	2800.25	0.0610772	0.189437	0.322414	0.747139
BAZ2A	308.178	0.340296	0.327326	1.03962	0.298515
BAZ2B	253.572	-0.0402757	0.247274	-0.162879	0.870614
BAZ2B-AS1	61.2743	0.231796	0.353873	0.655028	0.51245
BBC3	38.2721	0.30208	0.55503	0.54426	0.586263
BBIP1	48.7507	0.585507	0.384094	1.52438	0.127413
BBLN	150.152	0.759713	1.196	0.635211	0.525291
BBOF1	11.5091	-0.142343	0.616303	-0.230963	0.817344
BBS1	55.5775	0.054303	0.35734	0.151965	0.879215
BBS10	22.1667	0.966382	0.511131	1.89068	0.0586677
BBS12	12.4773	0.283114	0.617725	0.458317	0.646725
BBS2	155.61	-0.0852318	0.262701	-0.324444	0.745602
BBS4	52.32	0.0495654	0.340834	0.145424	0.884376
BBS5	43.1886	-0.263697	0.416226	-0.633541	0.52638
BBS7	56.1481	0.419776	0.359706	1.167	0.243211
BBX	96.5992	0.102596	0.348824	0.294121	0.768665
BCAN	68.0289	0.339278	0.393162	0.862945	0.388167
BCAN-AS2	16.2912	-0.10664	0.510456	-0.208911	0.834518
BCAN-AS2_1	15.9148	-0.117377	0.517102	-0.22699	0.820432
BCAP31	1142.46	-0.221078	0.236833	-0.933477	0.350574
BCAR1	41.2103	-0.137518	0.735792	-0.186897	0.851741
BCAR1_1	40.8791	-0.116142	0.754249	-0.153984	0.877622
BCAR3	16.4355	0.336021	0.561267	0.598683	0.549384
BCAS2	262.349	0.38018	0.320457	1.18637	0.235477
BCAS3	16.95	-0.48922	0.509776	-0.959677	0.337218
BCAS4	18.6127	0.455384	0.508979	0.894701	0.370947
BCAT1	348.708	0.481621	0.343327	1.4028	0.160675
BCAT2	177.827	-0.72433	0.471217	-1.53715	0.124257
BCCIP	834.441	0.485582	0.32353	1.50089	0.133384
BCDIN3D	29.3387	0.176001	0.389788	0.45153	0.651607
BCKDHA	179.271	-0.362399	0.414471	-0.874365	0.381919
BCKDHB	118.471	-0.291738	0.302086	-0.965746	0.334171
BCKDK	255.898	-0.126934	0.378096	-0.33572	0.737082
BCL10	74.4357	0.574893	0.417658	1.37647	0.168677
BCL11A	74.9804	0.187825	0.298269	0.629715	0.528881
BCL2	321.187	0.123757	0.24387	0.507472	0.611823
BCL2A1	208.037	0.295755	0.306432	0.965155	0.334467
BCL2L1	34.6791	0.437331	0.461827	0.946958	0.34366
BCL2L11	289.686	0.176043	0.246786	0.713345	0.475632
BCL2L12	464.553	-0.331781	0.292473	-1.1344	0.256628
BCL2L13	187.916	0.385751	0.271567	1.42046	0.155472
BCL2L15	13.6523	0.0981766	0.52928	0.185491	0.852844
BCL2L2	124.063	1.12198	0.512838	2.18779	0.028685
BCL3	64.7703	0.144949	0.503674	0.287783	0.773513
BCL6	88.2962	0.21978	0.29207	0.752491	0.451756
BCL7A	67.8499	-0.253041	0.347048	-0.729125	0.465925
BCL7A_1	62.5076	-0.248352	0.343956	-0.722046	0.470266
BCL7B	1129.36	-0.0836035	0.218937	-0.381861	0.702565
BCL7C	280.409	-0.691837	0.594084	-1.16454	0.244203
BCL9L	11.8756	-0.333327	0.719461	-0.4633	0.643149
BCLAF1	935.343	0.383828	0.304419	1.26086	0.20736
BCLAF1P2	39.2277	-0.422237	0.466934	-0.904277	0.365849
BCLAF3	75.6109	0.143595	0.300147	0.478415	0.632355
BCO2	204.23	-0.354046	0.298985	-1.18416	0.236349
BCOR	187.543	0.228232	0.328204	0.695397	0.486806
BCORL1	157.813	-0.29111	0.286455	-1.01625	0.30951
BCR	142.627	-0.373636	0.351124	-1.06412	0.287276
BCRP2	12.7523	-0.844308	0.610588	-1.38278	0.166733
BCRP3	11.5032	-0.919178	0.795178	-1.15594	0.247706
BCS1L	938.489	-0.442322	0.257189	-1.71983	0.0854628
BCYRN1	541.575	-0.767873	0.436545	-1.75898	0.078581
BDH1	758.434	-0.383488	0.278955	-1.37473	0.169215
BDH1_1	709.632	-0.429873	0.29468	-1.45878	0.144626
BDH2	148.684	-0.119422	0.29279	-0.407876	0.683365
BDNF-AS	12.8848	0.443837	0.645498	0.687589	0.491711
BDP1	227.591	0.254183	0.278059	0.914132	0.360647
BDP1_1	227.381	0.25996	0.277041	0.938346	0.348067
BDP1_2	227.787	0.251454	0.278339	0.903408	0.36631
BDP1_3	231.074	0.249845	0.274672	0.909613	0.363027
BECN1	152.101	0.139	0.28126	0.494203	0.621163
BEGAIN	76.5731	-0.328117	0.521461	-0.629226	0.529201
BEND3	95.7614	0.0920353	0.276725	0.332588	0.739446
BEND5	13.0071	-0.248436	0.603096	-0.411935	0.680387
BEND6	10.5367	1.1235	0.695642	1.61505	0.1063
BEND7	16.8548	0.217528	0.489098	0.444753	0.656498
BEST1	36.6016	0.0474661	0.377161	0.125851	0.89985
BET1	220.641	0.462728	0.333745	1.38647	0.165604
BET1L	270.527	0.302254	0.279134	1.08283	0.278885
BEX1	3412.69	0.444698	0.326118	1.36361	0.17269
BEX2	9.11396	0.412779	0.719304	0.573859	0.566064
BEX3	283.236	0.532824	0.393712	1.35334	0.175948
BEX4	54.6831	0.482058	0.41725	1.15532	0.247959
BFAR	186.629	0.529819	0.34291	1.54507	0.122329
BFAR_1	183.307	0.557413	0.34442	1.61841	0.105574
BFSP1	16.362	-0.315438	0.498813	-0.632378	0.52714
BHLHE22	68.1027	0.27927	0.409687	0.681668	0.495449
BHLHE40	103.004	0.117454	0.288032	0.407782	0.683434
BICC1	18.2913	0.475502	0.543869	0.874294	0.381958
BICD1	78.8784	0.061991	0.316768	0.195698	0.844846
BICD2	235.019	0.252619	0.297887	0.848035	0.396419
BICDL1	89.5967	-0.316781	0.435821	-0.726861	0.467311
BICRA	240.093	-0.664524	0.446312	-1.48892	0.136508
BICRAL	65.5082	0.487283	0.320292	1.52137	0.128167
BID	396.889	0.0640626	0.224221	0.285711	0.775099
BIK	70.2269	-0.324101	0.30882	-1.04948	0.293956
BIN2	2176.45	-0.217942	0.215739	-1.01021	0.312394
BIN3	120.693	-0.404145	0.34024	-1.18782	0.234903
BIRC2	426.205	0.0881418	0.284152	0.310193	0.756414
BIRC3	86.5877	0.183059	0.299816	0.61057	0.541485
BIRC5	828.022	0.0979338	0.22927	0.427154	0.669267
BIRC6	432.389	0.32174	0.262863	1.22398	0.220958
BISPR	65.1024	0.355248	0.298671	1.18943	0.234271
BIVM	632.048	0.0794999	0.264091	0.301032	0.76339
BLCAP	708.831	0.0998996	0.211997	0.471231	0.637476
BLM	524.527	-0.243369	0.25102	-0.969518	0.332287
BLMH	741.805	-0.0474834	0.23556	-0.201576	0.840248
BLOC1S1	85.2996	0.421803	0.342677	1.2309	0.218359
BLOC1S2	504.663	0.255811	0.271036	0.943828	0.345258
BLOC1S3	220.226	-0.476722	0.310798	-1.53387	0.125062
BLOC1S4	168.72	-0.117128	0.248335	-0.471654	0.637174
BLOC1S6	209.792	0.429269	0.316934	1.35444	0.175596
BLTP1	409.59	0.292494	0.266588	1.09717	0.272565
BLTP2	1443.3	-0.0280399	0.196348	-0.142808	0.886442
BLTP3A	187.103	0.310345	0.2901	1.06979	0.284715
BLTP3B	100.739	0.550003	0.334617	1.64368	0.100243
BLVRA	132.221	0.228632	0.309298	0.739198	0.459786
BLVRB	69.7143	-0.0410133	0.360528	-0.113759	0.909429
BLZF1	37.2976	0.391458	0.384031	1.01934	0.308042
BMAL1	138.28	0.0535498	0.303255	0.176584	0.859835
BMAL2	14.1589	0.862526	0.552516	1.56109	0.118503
BMF	145.603	0.0846285	0.28934	0.292488	0.769914
BMP1	100.12	-0.530658	0.43521	-1.21931	0.222725
BMP2	37.2161	0.403431	0.40666	0.992059	0.321169
BMP2K	110.82	-0.0274572	0.308721	-0.0889383	0.929131
BMP4	22.7607	-0.219024	0.434565	-0.504007	0.614256
BMP8A	19.1957	0.316266	0.48088	0.657681	0.510743
BMP8B	92.5761	-0.184417	0.292971	-0.629472	0.52904
BMPR1A	129.217	0.304775	0.32363	0.941739	0.346326
BMPR2	22.5619	0.285816	0.564885	0.505972	0.612876
BMS1	1013.27	-0.207591	0.24229	-0.856789	0.391562
BMS1P1	59.6773	0.357594	0.32379	1.1044	0.26942
BMS1P2	22.4497	0.356942	0.450038	0.793138	0.427698
BMS1P20	140.926	0.116458	0.279979	0.415951	0.677446
BMS1P23	18.8401	-0.136545	0.483738	-0.282271	0.777735
BMS1P2-AGAP9	11.0491	-0.0810098	0.643134	-0.125961	0.899763
BMS1P4	30.591	-0.577643	0.432866	-1.33446	0.182053
BMS1P4-AGAP5	42.3296	-0.185956	0.350905	-0.529932	0.596159
BMT2	16.8976	0.210898	0.507677	0.415418	0.677836
BMX	136.017	0.140692	0.302544	0.46503	0.64191
BNIP1	85.8856	-0.196803	0.294008	-0.669378	0.503254
BNIP2	162.866	0.426775	0.314064	1.35888	0.174184
BNIP3	100.808	0.351561	0.40332	0.871669	0.383389
BNIP3L	164.641	0.425306	0.338458	1.2566	0.208899
BNIPL	26.5959	-0.374275	0.447596	-0.836188	0.403049
BOD1	272.787	-0.0183209	0.224881	-0.0814692	0.935069
BOD1L1	254.193	-0.153814	0.343865	-0.447311	0.654651
BOLA1	63.8564	-0.0781798	0.331448	-0.235873	0.813531
BOLA2	401.107	-0.128274	0.274966	-0.46651	0.640851
BOLA2B	575.266	0.0164884	0.337041	0.0489212	0.960982
BOLA2-SMG1P6	244.089	0.214613	0.264876	0.810237	0.417804
BOLA3	151.034	0.598599	0.412892	1.44977	0.147123
BOP1	940.565	-0.759127	0.571538	-1.32822	0.184106
BOP1_1	25.8074	-0.031884	0.446076	-0.0714764	0.943019
BORA	309.687	0.155145	0.263298	0.589238	0.555702
BORCS5	45.7338	-0.0329702	0.335288	-0.098334	0.921667
BORCS5_1	47.2901	-0.0525114	0.324978	-0.161585	0.871633
BORCS6	92.5131	-0.374565	0.486577	-0.769795	0.441421
BORCS7	94.8321	0.0247529	0.293538	0.0843259	0.932797
BORCS8	86.4234	-0.0114818	0.303826	-0.0377906	0.969855
BPGM	45.3124	-0.0380928	0.368739	-0.103306	0.91772
BPHL	41.869	0.23835	0.372744	0.639448	0.522532
BPI	153.785	-0.555362	0.26252	-2.11551	0.0343868
BPNT1	151.152	0.55458	0.31172	1.77909	0.0752242
BPNT2	445.785	0.377333	0.290175	1.30036	0.193476
BPTF	488.091	-0.0529756	0.224714	-0.235747	0.813629
BRAF	61.1146	0.308419	0.34665	0.889715	0.373619
BRAP	245.873	0.0112475	0.221161	0.0508566	0.95944
BRAT1	619.602	-0.704297	0.663435	-1.06159	0.288421
BRCA1	541.879	0.0837888	0.21075	0.397573	0.690945
BRCA2	781.205	0.412811	0.241693	1.708	0.0876359
BRCC3	324.485	0.293081	0.273018	1.07348	0.283054
BRD1	407.007	0.089584	0.248148	0.36101	0.718092
BRD2	1511.2	0.0121463	0.216586	0.0560807	0.955277
BRD2_1	1590.28	-0.00372907	0.20296	-0.0183734	0.985341
BRD2_2	1331.99	-0.0787472	0.198739	-0.396234	0.691932
BRD2_3	1721.4	-0.0249563	0.202449	-0.123272	0.901892
BRD2_4	405.887	0.313815	0.342799	0.915448	0.359957
BRD2_5	1797.51	-0.0156609	0.205194	-0.0763225	0.939163
BRD2_6	1594.71	-0.00347123	0.202806	-0.017116	0.986344
BRD3	122.623	-0.43639	0.305642	-1.42778	0.153355
BRD3OS	53.0753	0.373517	0.347863	1.07375	0.282935
BRD4	913.059	-0.333277	0.295581	-1.12753	0.259517
BRD7	566.917	0.102738	0.240213	0.427694	0.668874
BRD8	2250.72	-0.316742	0.254672	-1.24373	0.2136
BRD9	2774.94	-0.832732	0.386573	-2.15414	0.0312292
BRF1	185.478	-0.460884	0.595096	-0.774469	0.438654
BRF2	8.03163	1.01764	0.723707	1.40615	0.159679
BRI3	281.899	0.237116	0.316379	0.749468	0.453575
BRI3BP	672.174	0.290088	0.231434	1.25343	0.210048
BRICD5	32.1375	0.0937407	1.46203	0.0641169	0.948877
BRIP1	212.297	0.275974	0.277319	0.99515	0.319663
BRIX1	24.7372	0.0396578	0.571441	0.0693997	0.944671
BRK1	1164.99	0.499154	0.322622	1.54718	0.12182
BRME1	45.2216	-0.633558	0.411731	-1.53877	0.123861
BRME1_1	46.3838	-0.677802	0.410427	-1.65145	0.0986458
BRMS1	680.174	-0.525325	0.391393	-1.34219	0.179533
BRMS1L	25.1675	0.936323	0.502308	1.86404	0.0623159
BROX	280.716	0.299281	0.248583	1.20395	0.228609
BRPF1	262.755	-0.190791	0.236851	-0.80553	0.420514
BRPF3	67.4352	0.258743	0.322578	0.802111	0.422489
BRPF3-AS1	178.579	-0.176699	0.327767	-0.539099	0.589819
BRSK1	41.0255	-0.297609	0.471942	-0.630605	0.528299
BRSK2	142.287	-0.554239	0.53357	-1.03874	0.298927
BRSK2_1	138.167	-0.542666	0.533445	-1.01729	0.309018
BRWD1	463.645	0.288942	0.31421	0.919584	0.35779
BRWD3	96.1217	0.228382	0.290244	0.786862	0.431363
BSDC1	233.877	-0.155206	0.237634	-0.653129	0.513673
BSG	850.992	-0.0427066	0.480324	-0.0889121	0.929152
BSG-AS1	45.5615	0.351754	0.356062	0.987901	0.323201
BSN	22.0961	0.0177699	0.490301	0.0362429	0.971089
BSPRY	27.7434	-0.138366	0.433607	-0.319104	0.749647
BST1	183.537	0.428958	0.325749	1.31684	0.187894
BST2	854.225	-0.0128099	0.398231	-0.0321671	0.974339
BTAF1	526.246	0.334934	0.261753	1.27958	0.200693
BTBD1	181.838	0.640494	0.309181	2.07158	0.0383046
BTBD10	122.074	0.111583	0.282597	0.394849	0.692954
BTBD19	11.9296	-0.505718	0.591195	-0.855418	0.39232
BTBD2	211.304	0.214589	1.08582	0.197628	0.843336
BTBD3	71.602	0.301684	0.294792	1.02338	0.306128
BTBD6	188.76	-0.388102	0.320802	-1.20979	0.226361
BTBD7	268.626	0.155191	0.232408	0.667753	0.504291
BTBD7_1	259.001	0.154306	0.232826	0.662754	0.507488
BTBD8	28.3708	-0.217705	0.417777	-0.521104	0.602295
BTBD9	49.7002	0.156275	0.375405	0.416284	0.677202
BTD	55.9101	0.250221	0.356335	0.702208	0.482549
BTF3	1747.46	0.643635	0.352929	1.82369	0.0681983
BTF3L4	271.641	0.442748	0.303563	1.4585	0.144702
BTG1	587.851	0.610633	0.36727	1.66263	0.0963875
BTG2	74.8983	0.552666	0.311257	1.77559	0.0758001
BTG3	160.641	-0.119439	0.270413	-0.441691	0.658713
BTK	710.806	-0.0659025	0.212821	-0.309661	0.756819
BTLA	23.1479	0.356117	0.524622	0.678806	0.497261
BTN2A1	357.825	-0.0697506	0.231163	-0.301737	0.762852
BTN2A1_1	352.993	-0.0817627	0.231654	-0.352952	0.724125
BTN2A2	55.6533	0.241981	0.328667	0.736249	0.461579
BTN3A1	221.602	-0.154067	0.25303	-0.608888	0.542599
BTN3A2	733.467	-0.404393	0.23928	-1.69004	0.0910199
BTN3A3	131.058	-0.601366	0.296799	-2.02617	0.0427474
BTRC	102.658	0.115006	0.285398	0.402965	0.686974
BUB1	534.7	0.0381778	0.257629	0.148189	0.882194
BUB1B	449.025	0.15052	0.236366	0.63681	0.524249
BUB3	1566.99	0.338716	0.278362	1.21682	0.223674
BUD13	234.982	-0.192325	0.242654	-0.792588	0.428018
BUD23	2109.67	-0.211495	0.205567	-1.02884	0.303555
BUD31	299.583	0.660206	0.397997	1.65882	0.0971519
BVES	27.5937	1.00857	0.457398	2.20502	0.0274529
BYSL	346.338	-0.189441	0.278569	-0.68005	0.496473
BZW1	1121.5	0.58625	0.352561	1.66283	0.0963462
BZW2	952.784	0.36521	0.291615	1.25237	0.210435
C10orf88	139.85	-0.0402437	0.270392	-0.148835	0.881684
C10orf88B	70.1851	0.0644559	0.33699	0.191269	0.848315
C10orf95-AS1	297.36	-0.0672539	0.241577	-0.278395	0.780709
C11orf21	1045.25	-0.319208	0.261287	-1.22167	0.221831
C11orf24	119.525	-0.380969	0.286065	-1.33176	0.18294
C11orf54	172.383	0.181976	0.270336	0.673145	0.500855
C11orf58	847.854	0.372353	0.297322	1.25235	0.210441
C11orf68	138.398	0.195783	0.292549	0.66923	0.503349
C11orf71	57.0068	0.448686	0.331618	1.35302	0.176049
C11orf80	102.109	-0.28111	0.297471	-0.945001	0.344659
C12orf4	282.21	-0.106415	0.242794	-0.438293	0.661174
C12orf43	217.981	-0.218606	0.305056	-0.716608	0.473616
C12orf57	45.0927	-0.0278935	0.580636	-0.0480396	0.961685
C12orf75	107.487	0.538176	0.398505	1.35049	0.17686
C12orf76	62.6045	0.295332	0.342965	0.861113	0.389176
C13orf46	137.08	-0.505282	0.38691	-1.30594	0.191572
C13orf46_1	47.531	-0.520211	0.520813	-0.998846	0.317869
C14orf119	830.667	-0.067226	0.228403	-0.294331	0.768505
C14orf28	30.8739	0.177327	0.385856	0.459567	0.645827
C14orf93	175.386	-0.498586	0.313293	-1.59144	0.111511
C15orf39	170.788	0.0307959	0.325271	0.0946779	0.924571
C15orf40	77.2498	-0.0290187	0.289802	-0.100133	0.920239
C15orf61	17.9703	0.608269	0.490562	1.23994	0.214997
C16orf46	9.49612	0.34203	0.675527	0.506315	0.612635
C16orf46_1	9.79601	0.300658	0.657478	0.45729	0.647462
C16orf54	178.75	0.739057	0.366192	2.01822	0.0435679
C16orf74	99.892	-0.0421719	0.480238	-0.0878145	0.930024
C16orf86	42.8115	-0.485419	0.555749	-0.87345	0.382418
C16orf87	35.5813	0.702366	0.551412	1.27376	0.202749
C16orf95	15.6477	-0.157284	0.622559	-0.252642	0.800545
C17orf100	29.8868	-0.547944	0.399303	-1.37225	0.169986
C17orf58	102.619	0.231239	0.334857	0.690561	0.489842
C17orf67	86.1576	-0.235544	0.345236	-0.682269	0.495069
C17orf75	241.322	-0.206712	0.258093	-0.800923	0.423176
C17orf80	195.795	0.15269	0.249867	0.611084	0.541144
C18orf21	204.678	0.261765	0.25593	1.0228	0.306405
C18orf32	13.6218	-0.162257	0.559878	-0.289808	0.771963
C18orf54	105.681	0.0302682	0.277034	0.109258	0.912998
C19orf12	206.666	-0.679191	0.369667	-1.8373	0.0661649
C19orf18	24.728	-0.887297	0.54438	-1.62992	0.103118
C19orf25	165.477	-0.212798	0.627953	-0.338876	0.734703
C19orf38	213.871	-0.185939	0.234015	-0.794562	0.426869
C19orf44	61.1917	-0.730735	0.548679	-1.33181	0.182923
C19orf47	112.402	0.164375	0.364813	0.450575	0.652296
C19orf48P	1630.87	-0.802892	0.484395	-1.65752	0.097415
C19orf53	320.77	0.0301513	0.28853	0.1045	0.916773
C19orf73	11.5952	-1.20458	0.701969	-1.71601	0.0861606
C1D	123.941	0.479136	0.337446	1.41989	0.15564
C1GALT1	386.527	0.206003	0.261675	0.787247	0.431137
C1GALT1C1	57.1444	0.722868	0.521265	1.38676	0.165516
C1GALT1C1_1	58.6626	0.745302	0.523432	1.42387	0.154483
C1GALT1C1L	34.542	-0.432997	0.455079	-0.951477	0.341362
C1orf109	95.3178	0.593261	0.412077	1.43968	0.149957
C1orf115	14.7592	-0.373873	0.568024	-0.6582	0.51041
C1orf122	176.251	-0.332547	0.279679	-1.18903	0.234428
C1orf131	163.661	0.475973	0.361983	1.3149	0.188542
C1orf159	97.9658	-0.364902	1.16612	-0.312919	0.754342
C1orf162	1233.6	0.0946574	0.18717	0.505729	0.613047
C1orf174	109.098	-0.0113349	0.319752	-0.0354489	0.971722
C1orf198	51.0458	0.445763	0.343138	1.29908	0.193917
C1orf21	37.7714	0.526875	0.440795	1.19528	0.231977
C1orf216	136.92	0.0244711	0.267833	0.0913671	0.927201
C1orf226	21.7444	-0.0392131	0.44769	-0.0875899	0.930203
C1orf35	508.805	-0.764058	0.45902	-1.66454	0.0960043
C1orf43	1131.33	0.499938	0.309066	1.61758	0.105754
C1orf50	108.196	-0.0803135	0.284002	-0.282793	0.777336
C1orf52	404.315	0.240043	0.22806	1.05254	0.292551
C1orf53	9.16437	0.508191	0.775002	0.655729	0.511999
C1orf54	163.854	0.245844	0.267973	0.917419	0.358923
C1orf56	19.553	0.744983	0.552868	1.34749	0.177823
C1orf74	33.4456	0.9193	0.539908	1.7027	0.0886248
C1QBP	904.189	0.681639	0.3737	1.82403	0.0681478
C1QTNF3	139.206	-0.124748	0.279718	-0.445978	0.655613
C1QTNF6	19.8918	-0.26442	0.512615	-0.515825	0.605977
C1R	12.6122	-0.520036	0.625088	-0.831941	0.405442
C1R_1	13.4188	-0.377892	0.629023	-0.60076	0.548
C1RL	255.721	0.0702209	0.231358	0.303516	0.761496
C1RL_1	252.255	0.0721069	0.23167	0.311248	0.755612
C1RL-AS1	14.7848	0.455521	0.556065	0.819187	0.41268
C1RL-AS1_1	16.4409	0.510598	0.530338	0.962778	0.335659
C1S	47.463	-0.45726	0.390335	-1.17146	0.241415
C2	32.3346	-0.291353	0.389607	-0.747812	0.454574
C2_1	32.3346	-0.291353	0.389607	-0.747812	0.454574
C2_2	32.3346	-0.291353	0.389607	-0.747812	0.454574
C2_3	31.8131	-0.308107	0.385003	-0.800273	0.423553
C2_4	32.3346	-0.291353	0.389607	-0.747812	0.454574
C2_5	32.3346	-0.291353	0.389607	-0.747812	0.454574
C2_6	32.3346	-0.291353	0.389607	-0.747812	0.454574
C20orf96	208.071	-0.0657322	0.22662	-0.290054	0.771775
C21orf58	227.549	-0.0541856	0.28205	-0.192113	0.847653
C21orf91	105.865	0.450761	0.349228	1.29073	0.196796
C22orf23	19.5432	0.875054	0.512789	1.70646	0.0879223
C22orf39	194.673	0.275505	0.297913	0.924785	0.355078
C22orf46P	315.456	-0.231135	0.325192	-0.710766	0.477229
C2CD2	195.458	-0.355333	0.338094	-1.05099	0.293265
C2CD2L	249.423	-0.221789	0.319419	-0.694354	0.48746
C2CD3	201.904	-0.0179529	0.245195	-0.0732187	0.941632
C2CD5	501.431	0.142822	0.235907	0.605416	0.544903
C2orf42	146.566	-0.385853	0.298484	-1.29271	0.196112
C2orf49	70.7679	0.297027	0.372655	0.797056	0.425418
C2orf66	10.4849	-0.338262	0.607566	-0.556749	0.577699
C2orf68	280.349	0.337439	0.265714	1.26993	0.204109
C2orf69	101.457	0.460701	0.341918	1.3474	0.177851
C2orf74	223.489	0.394155	0.333677	1.18125	0.237505
C2orf74-DT	36.6387	0.32516	0.487752	0.666651	0.504995
C2orf76	40.8446	0.53782	0.559576	0.961121	0.336491
C2orf81	43.1092	-0.562013	0.509846	-1.10232	0.270323
C2orf92	77.5185	-0.662105	0.408854	-1.61941	0.105358
C2orf92_1	78.2704	-0.638495	0.408089	-1.5646	0.117677
C3	61.1002	0.251487	0.310772	0.809236	0.41838
C3AR1	18.835	-0.150364	0.535187	-0.280955	0.778745
C3orf14	38.6305	0.00610319	0.432557	0.0141096	0.988743
C3orf18	14.4614	0.26561	0.528676	0.502407	0.615381
C3orf33	72.6431	0.382104	0.330486	1.15619	0.247605
C3orf38	194.172	0.0806343	0.28686	0.281093	0.778639
C3orf62	681.613	-0.383786	0.322098	-1.19152	0.23345
C3orf80	139.617	0.552804	0.327815	1.68633	0.0917323
C4A	133.206	-0.732563	0.431076	-1.69938	0.0892472
C4A_1	126.27	-0.708728	0.413517	-1.7139	0.0865464
C4A_2	133.781	-0.702326	0.440222	-1.59539	0.110625
C4B	126.493	-0.739584	0.45807	-1.61457	0.106404
C4B_1	126.789	-0.739947	0.453223	-1.63264	0.102546
C4B_2	129.542	-0.750743	0.44489	-1.68748	0.0915112
C4B_2_1	100.36	-0.685362	0.467684	-1.46544	0.142801
C4B_3	100.331	-0.707695	0.467282	-1.51449	0.129901
C4orf3	310.807	0.433166	0.300762	1.44023	0.149802
C4orf33	124.835	0.281478	0.297021	0.947671	0.343297
C4orf46	235.236	0.438559	0.317549	1.38107	0.167256
C4orf48	26.3795	1.54446	1.10134	1.40235
C5	32.9768	0.190852	0.433997	0.439755	0.660114
C5AR1	48.1288	-0.0100162	0.406192	-0.0246588	0.980327
C5AR2	40.1118	0.122352	0.391917	0.312189	0.754897
C5orf15	363.006	0.274216	0.278792	0.983586	0.325319
C5orf22	283.096	0.412245	0.314879	1.30922	0.190461
C5orf24	77.6869	0.489358	0.344303	1.4213	0.15523
C5orf34	268.498	0.151291	0.299461	0.505211	0.61341
C5orf63	108.717	-0.107073	0.275692	-0.388381	0.697734
C6orf120	122.485	0.500677	0.33023	1.51615	0.129483
C6orf136	447.023	-0.402691	0.256039	-1.57277	0.115771
C6orf136_1	444.046	-0.405361	0.259246	-1.56361	0.117908
C6orf136_2	447.023	-0.402691	0.256039	-1.57277	0.115771
C6orf136_3	441.326	-0.391577	0.255103	-1.53498	0.12479
C6orf136_4	447.023	-0.402691	0.256039	-1.57277	0.115771
C6orf136_5	447.132	-0.401871	0.256117	-1.56909	0.116626
C6orf136_6	447.553	-0.398691	0.25486	-1.56436	0.117734
C6orf147	34.6022	0.278014	0.425743	0.65301	0.51375
C6orf163	23.3491	-0.169391	0.422345	-0.401072	0.688367
C6orf226	15.4035	-0.160688	0.687567	-0.233706	0.815214
C6orf47	136.789	0.27707	0.349145	0.793565	0.427449
C6orf47_1	135.514	0.287102	0.359832	0.797879	0.42494
C6orf47_2	137.571	0.296723	0.352634	0.841447	0.400098
C6orf47_3	133.949	0.280493	0.358121	0.783234	0.433489
C6orf47_4	138.78	0.291699	0.35138	0.830152	0.406453
C6orf47_5	138.78	0.291699	0.35138	0.830152	0.406453
C6orf47_6	138.78	0.291699	0.35138	0.830152	0.406453
C6orf52	36.9041	-0.512596	0.362543	-1.41389	0.157394
C6orf52_1	35.9961	-0.490244	0.365472	-1.3414	0.179791
C6orf62	3586.14	0.162624	0.237341	0.685191	0.493223
C6orf89	294.923	0.0221847	0.233048	0.095194	0.924161
C7orf25	55.4148	0.236175	0.368406	0.641073	0.521475
C7orf31	57.9496	0.196017	0.361056	0.5429	0.587198
C7orf50	292.328	0.059605	0.467662	0.127453	0.898582
C8G	12.0754	-0.42512	1.01916	-0.417128	0.676585
C8orf33	279.179	0.0631543	0.235524	0.268144	0.788589
C8orf33_1	275.668	0.0604691	0.236504	0.255679	0.798198
C8orf44	47.8778	0.329595	0.328955	1.00195	0.31637
C8orf76	96.1217	0.470314	0.307193	1.531	0.125769
C8orf82	108.011	0.251713	0.378359	0.665276	0.505874
C9orf40	96.2373	0.305474	0.322675	0.946691	0.343796
C9orf43	16.8407	-0.219925	0.531931	-0.413447	0.679279
C9orf78	1416.75	-0.309866	0.289676	-1.0697	0.284755
C9orf85	34.1275	0.376678	0.471727	0.798508	0.424576
CA11	35.2323	0.380604	0.577366	0.659207	0.509763
CA2	1466.53	0.607539	0.354108	1.71569	0.0862192
CA3-AS1	15.036	-0.0381017	0.545757	-0.0698144	0.944341
CA4	17.2672	0.422195	0.576229	0.732687	0.463749
CA5BP1	342.124	-0.290907	0.528164	-0.550788	0.581779
CA8	111.498	0.225792	0.341651	0.660885	0.508686
CAB39	310.668	0.526469	0.333108	1.58048	0.113998
CAB39L	21.391	0.24961	0.458347	0.544588	0.586037
CABIN1	533.454	-0.67176	0.508548	-1.32094	0.186523
CABLES1	41.3495	0.117058	0.4055	0.288675	0.77283
CABLES2	119.194	-0.419545	0.273715	-1.53278	0.12533
CABYR	18.9853	-1.02178	0.494269	-2.06726	0.0387094
CACHD1	83.1858	0.079068	0.288284	0.274271	0.783876
CACNA1A	95.1142	-0.565885	0.349622	-1.61856	0.105542
CACNA2D1	58.2852	0.463106	0.416323	1.11237	0.265977
CACNA2D3	15.3308	0.343318	0.52512	0.65379	0.513247
CACNA2D4	3694.46	-0.494797	0.332586	-1.48773	0.136823
CACNA2D4_1	3606.98	-0.487241	0.332051	-1.46737	0.142276
CACNB1	283.025	-0.671449	0.417363	-1.60879	0.107662
CACNB2	11.4058	0.11028	0.585821	0.188249	0.850682
CACNB3	107.192	-0.57898	0.388462	-1.49044	0.136108
CACTIN	191.592	-0.464583	0.580607	-0.800168	0.423613
CACUL1	356.58	0.10017	0.245871	0.40741	0.683707
CACYBP	944.258	0.633527	0.303656	2.08633	0.0369487
CAD	941.845	-0.498889	0.347061	-1.43747	0.150586
CADM1	95.2599	0.681233	0.319137	2.13461	0.0327929
CALCOCO1	102.457	0.344864	0.308869	1.11654	0.264193
CALCOCO2	889.988	-0.0444949	0.214087	-0.207835	0.835357
CALCRL-AS1	36.4637	-0.41112	0.370975	-1.10822	0.267768
CALHM2	41.2028	0.0255845	0.375733	0.0680922	0.945712
CALHM6	18.9034	0.652931	0.547784	1.19195	0.233282
CALM1	1669.46	0.396189	0.265146	1.49423	0.135116
CALM2	1128.4	0.565793	0.314555	1.79871	0.0720646
CALM3	736.925	0.26652	0.271224	0.982657	0.325776
CALML4	141.319	-0.322874	0.268936	-1.20056	0.229921
CALR	4649.81	0.163873	0.250852	0.653267	0.513584
CALU	180.154	0.784582	0.320693	2.44652	0.0144243
CAMK1	251.992	-0.304558	0.350015	-0.87013	0.38423
CAMK1D	22.9334	-0.0235411	0.456291	-0.0515922	0.958854
CAMK2D	110.028	0.320215	0.298774	1.07176	0.283827
CAMK2G	661.708	-0.316942	0.246001	-1.28838	0.197614
CAMK2N2	9.58698	-0.132735	0.685567	-0.193613	0.846479
CAMK4	20.5182	0.461559	0.496078	0.930416	0.352156
CAMKK1	431.64	-0.747137	0.390765	-1.91199	0.055878
CAMKK2	351.587	0.118246	0.202756	0.583193	0.559764
CAMKMT	115.269	0.0713427	0.267344	0.266857	0.789579
CAMKV	208.013	-0.471101	0.29168	-1.61513	0.106283
CAMLG	214.873	0.00827941	0.322097	0.0257047	0.979493
CAMSAP1	322.163	-0.0594567	0.217956	-0.272793	0.785013
CAMSAP1-DT	51.8559	-0.170449	0.325696	-0.523337	0.60074
CAMSAP2	13.8368	0.246719	0.554041	0.445308	0.656097
CAMSAP3	95.1693	-0.257308	0.556997	-0.461957	0.644112
CAMTA1	244.831	0.32662	0.315476	1.03532	0.300517
CAMTA1-DT	10.9761	-0.194643	0.638706	-0.304745	0.76056
CAMTA2	562.867	-0.512441	0.470513	-1.08911	0.276105
CAMTA2-AS1	83.737	0.198231	0.375782	0.527516	0.597835
CAND1	813.274	0.231276	0.250381	0.923699	0.355643
CANT1	180.799	0.118995	0.257854	0.461481	0.644453
CANX	3768.32	0.457581	0.304216	1.50413	0.132548
CANX_1	3714.35	0.471944	0.306134	1.54163	0.123164
CAP1	173.001	-0.370463	0.418924	-0.884321	0.376523
CAPG	394.405	-0.228895	0.279668	-0.818455	0.413098
CAPN1	493.46	0.000676858	0.450466	0.00150257	0.998801
CAPN10	218.568	-0.424995	0.530442	-0.80121	0.42301
CAPN10-DT	13.9959	0.71387	0.627222	1.13815	0.255059
CAPN12	16.8701	-0.315099	0.666832	-0.472531	0.636548
CAPN12_1	17.1458	-0.264122	0.693295	-0.380966	0.703228
CAPN15	831.277	-0.172136	0.610456	-0.281979	0.77796
CAPN2	333.254	-0.0395083	0.224578	-0.175922	0.860355
CAPN3	1233.49	-0.602033	0.309564	-1.94478	0.0518017
CAPN5	10.6468	-0.129387	0.654918	-0.197561	0.843388
CAPN7	104.478	0.296666	0.35983	0.824461	0.409678
CAPNS1	513.32	0.348417	0.315625	1.1039	0.269639
CAPRIN1	1789.34	0.525084	0.319761	1.64211	0.100567
CAPRIN2	300.409	-0.344503	0.295618	-1.16537	0.24387
CAPS	67.977	-0.444895	0.681996	-0.652343	0.51418
CAPS_1	41.8994	-0.269271	0.792897	-0.339604	0.734155
CAPZA1	2557.82	0.432415	0.311272	1.38919	0.164775
CAPZA2	161.883	0.62997	0.315164	1.99886	0.0456234
CAPZB	1109.34	0.366862	0.283249	1.29519	0.195254
CARD10	77.3927	-0.611753	0.59525	-1.02772	0.30408
CARD16	47.3459	0.232616	0.349483	0.665599	0.505667
CARD19	116.408	0.0335897	0.549941	0.0610786	0.951297
CARD6	82.1226	0.462471	0.362893	1.2744	0.202522
CARD8	1545.7	0.0438595	0.212495	0.206402	0.836477
CARD8-AS1	43.6271	0.150035	0.374981	0.400114	0.689073
CARD9	642.101	-0.52584	0.697979	-0.753375	0.451225
CARF	21.4118	0.507746	0.606671	0.836939	0.402627
CARHSP1	317.771	0.210065	0.258194	0.813591	0.415879
CARM1	115.45	-0.0948284	0.467348	-0.202907	0.839207
CARMIL1	9.22124	-0.052465	0.640853	-0.0818674	0.934752
CARMIL2	209.615	-0.758331	0.601907	-1.25988	0.207712
CARNMT1	62.6672	0.604731	0.408282	1.48116	0.138564
CARS1	628.554	-0.149221	0.246829	-0.60455	0.545478
CARS1_1	668.947	-0.138362	0.240008	-0.576489	0.564285
CARS2	892.633	-0.154861	0.317618	-0.48757	0.625855
CASC3	533.797	-0.246851	0.240127	-1.028	0.30395
CASD1	267.009	0.275072	0.314246	0.875338	0.38139
CASK	38.7548	0.198	0.37605	0.526526	0.598523
CASP1	153.687	0.108006	0.286191	0.377391	0.705883
CASP10	180.129	-0.241702	0.244545	-0.988375	0.322969
CASP2	384.034	-0.0515246	0.247744	-0.207976	0.835248
CASP3	166.885	0.315748	0.265652	1.18858	0.234607
CASP4	107.602	0.387819	0.298338	1.29993	0.193624
CASP4_1	103.687	0.405889	0.304336	1.33369	0.182306
CASP6	57.6189	0.0531127	0.306521	0.173276	0.862434
CASP7	127.578	0.55749	0.381717	1.46048	0.144158
CASP8	186.353	0.414205	0.35887	1.15419	0.248421
CASP8AP2	310.049	0.510575	0.430529	1.18593	0.235652
CASP8AP2_1	396.259	0.333846	0.354614	0.941435	0.346482
CASP9	155.787	-0.408731	0.279417	-1.4628	0.143523
CAST	163.311	0.192288	0.271556	0.708097	0.478885
CASTOR2	433.358	0.125524	0.289197	0.434044	0.664256
CASTOR3P	45.9372	0.125588	0.343478	0.365636	0.714636
CASZ1	10.7551	0.208523	0.659015	0.316417	0.751686
CAT	1267.1	0.120199	0.225731	0.532487	0.594389
CATIP-AS1	18.3038	-0.642392	0.68533	-0.937346	0.348581
CATSPER1	40.1881	-0.366643	0.405523	-0.904124	0.36593
CATSPER2	13.6871	-0.609674	0.613929	-0.993069	0.320676
CATSPER3	15.764	-0.487575	0.496624	-0.981779	0.326209
CATSPERE	13.4276	0.18448	0.619637	0.297723	0.765914
CBFA2T2	109.462	-0.137064	0.283577	-0.483337	0.628856
CBFA2T3	311.956	-0.278578	0.285262	-0.976569	0.328783
CBFB	353.022	0.614994	0.377889	1.62745	0.103642
CBL	237.859	0.532291	0.324407	1.64081	0.100836
CBLB	133.31	0.0862661	0.319437	0.270056	0.787117
CBLL1	104.869	0.0992901	0.318235	0.312003	0.755039
CBLL1-AS1	9.44308	-0.0197928	0.710629	-0.0278526	0.97778
CBLN3	15.749	-0.755433	0.654577	-1.15408	0.248468
CBR1	432.012	0.450219	0.28385	1.58612	0.112712
CBR3	34.8222	0.412262	0.457023	0.902061	0.367024
CBR3-AS1	79.841	0.0949617	0.310972	0.305371	0.760084
CBR4	118.076	0.57492	0.390094	1.4738	0.140536
CBS	13.7523	-0.531752	0.784154	-0.678122	0.497694
CBX1	240.04	0.703806	0.408353	1.72352	0.084794
CBX2	64.466	-0.080283	0.312927	-0.256555	0.797522
CBX3	2741.52	0.346891	0.254909	1.36084	0.173564
CBX4	315.863	0.063056	0.209393	0.301137	0.76331
CBX5	1045.31	0.352871	0.246759	1.43002	0.152711
CBX6	237.08	-0.350618	0.275852	-1.27103	0.203716
CBX7	31.6617	0.0467152	0.40004	0.116776	0.907037
CBX8	405.545	-0.498678	0.389383	-1.28069	0.200303
CBY1	138.399	-0.256299	0.267215	-0.95915	0.337483
CC2D1A	305.162	-0.219095	0.597129	-0.366914	0.713683
CC2D1A_1	303.116	-0.219715	0.596349	-0.368434	0.71255
CC2D1B	375.775	-0.361969	0.297696	-1.2159	0.224022
CC2D2A	13.01	-0.536384	0.588317	-0.911725	0.361913
CCAR1	2996.41	-0.348339	0.376406	-0.925435	0.35474
CCAR2	730.771	-0.0476928	0.242048	-0.197038	0.843797
CCDC102A	23.0503	-0.34667	0.551081	-0.629073	0.529301
CCDC106	89.1593	-0.232638	0.640124	-0.363426	0.716287
CCDC112	49.5877	0.189254	0.353871	0.534812	0.59278
CCDC113	14.7701	0.373358	0.596932	0.625462	0.531668
CCDC115	179.261	0.370271	0.273525	1.3537	0.175832
CCDC117	332.596	0.526132	0.319997	1.64418	0.10014
CCDC12	359.676	-0.205883	0.274446	-0.750177	0.453148
CCDC122	34.8302	0.157312	0.408068	0.385505	0.699863
CCDC124	270.111	0.206718	1.05875	0.195248	0.845199
CCDC125	308.764	-0.121345	0.240947	-0.503616	0.614531
CCDC125_1	302.142	-0.0541435	0.242436	-0.223331	0.823278
CCDC126	12.4086	0.365704	0.592466	0.617257	0.537065
CCDC127	227.168	-0.0767037	0.250709	-0.305947	0.759645
CCDC13	10.9628	-0.0351127	0.606289	-0.0579141	0.953817
CCDC134	15.5094	-0.45852	0.514027	-0.892015	0.372385
CCDC136	60.1798	-0.777245	0.416776	-1.8649	0.0621958
CCDC137	791.703	-0.515448	0.391119	-1.31788	0.187544
CCDC138	73.3047	-0.0185782	0.397674	-0.0467171	0.962739
CCDC14	2605.62	0.0960308	0.23128	0.415215	0.677985
CCDC142	96.4439	-0.555992	0.332111	-1.67412	0.0941075
CCDC144CP	10.1494	0.693419	0.785512	0.882761	0.377366
CCDC146	71.2313	-0.090089	0.343605	-0.262187	0.793177
CCDC149	131.588	-0.358164	0.249454	-1.43579	0.151061
CCDC15	22.4482	0.159947	0.584624	0.27359	0.7844
CCDC150	496.601	-0.544615	0.308727	-1.76406	0.0777213
CCDC154	60.6314	-0.497568	0.6839	-0.727545	0.466892
CCDC157	24.6988	-0.36397	0.456255	-0.797732	0.425026
CCDC159	208.258	-0.38381	0.358921	-1.06934	0.284916
CCDC15-DT	15.2261	0.0379723	0.506221	0.0750113	0.940206
CCDC162P	24.7525	-0.643222	0.534274	-1.20392	0.228622
CCDC163	17.1745	0.458026	0.522809	0.876088	0.380982
CCDC167	107.894	-0.127874	0.305623	-0.418404	0.675652
CCDC168	11.5847	0.0568332	0.586666	0.0968749	0.922826
CCDC169	50.7835	0.371333	0.317903	1.16807	0.242778
CCDC17	49.1278	-0.339587	0.431472	-0.787042	0.431257
CCDC171	10.9034	-0.170382	0.62777	-0.271408	0.786077
CCDC174	159.69	-0.220059	0.261602	-0.841198	0.400237
CCDC18	844.07	0.0368414	0.269897	0.136502	0.891425
CCDC183	22.178	0.0434194	0.585087	0.0742101	0.940843
CCDC183-AS1	10.2354	0.587423	0.77746	0.755568	0.449909
CCDC186	65.3327	0.339103	0.362079	0.936545	0.348993
CCDC18-AS1	165.941	-0.142989	0.2869	-0.498391	0.618209
CCDC191	93.6991	-0.39399	0.264251	-1.49097	0.13597
CCDC194	29.2898	-0.421959	0.503717	-0.837692	0.402204
CCDC22	174.669	-0.497886	0.408492	-1.21884	0.222905
CCDC24	37.5926	-0.664762	0.573981	-1.15816	0.246799
CCDC25	210.943	0.445706	0.27043	1.64814	0.0993242
CCDC26	40.716	0.22033	0.442367	0.49807	0.618435
CCDC28A	273.693	0.259519	0.259091	1.00165	0.316511
CCDC28A-AS1	17.7352	-0.169202	0.499748	-0.338574	0.734931
CCDC28B	127.047	-0.105335	0.376985	-0.279415	0.779927
CCDC3	18.064	0.432659	0.554638	0.780074	0.435347
CCDC30	38.7508	0.0412179	0.404908	0.101796	0.918919
CCDC32	83.1213	0.12874	0.335348	0.3839	0.701052
CCDC34	1128.88	-0.630272	0.466827	-1.35012	0.176978
CCDC39	16.0816	0.850431	0.709216	1.19911	0.230483
CCDC43	275.011	0.550599	0.305453	1.80257	0.0714561
CCDC47	226.921	0.486193	0.334294	1.45439	0.145839
CCDC50	442.666	0.365835	0.295086	1.23976	0.215066
CCDC51	117.282	-0.109559	0.2589	-0.423169	0.672172
CCDC57	459.131	-0.565776	0.469788	-1.20432	0.228465
CCDC59	517.672	0.455542	0.312064	1.45977	0.144354
CCDC6	172.795	0.0686884	0.279218	0.246003	0.80568
CCDC61	90.1676	-0.803974	0.626251	-1.28379	0.199216
CCDC65	12.1247	-0.328483	0.564867	-0.581522	0.560889
CCDC66	338.338	0.164864	0.268544	0.613918	0.53927
CCDC69	130.514	0.11084	0.249812	0.443694	0.657264
CCDC7	17.8524	0.162146	0.532939	0.304249	0.760938
CCDC71	54.077	-0.147449	0.359095	-0.410614	0.681356
CCDC71L	46.3932	0.208781	0.33772	0.618208	0.536438
CCDC74A	131.343	-0.989893	0.468852	-2.11131	0.0347454
CCDC74B	12.4011	-0.447262	0.638233	-0.700782	0.483439
CCDC77	259.83	-0.396485	0.263779	-1.5031	0.132814
CCDC78	209.352	-0.96386	0.650857	-1.48091	0.138631
CCDC81	13.0826	0.58471	0.562059	1.0403	0.298201
CCDC82	350.861	0.281905	0.279411	1.00892	0.313011
CCDC85B	78.7368	-0.133647	0.795455	-0.168013	0.866573
CCDC85C	41.7715	0.188387	0.437924	0.430181	0.667064
CCDC86	94.501	0.188462	0.420697	0.447976	0.654171
CCDC88A	436.213	0.238546	0.258196	0.923894	0.355541
CCDC88B	3685.46	-1.31325	0.995406	-1.31931	0.187067
CCDC88C	613.07	-0.303034	0.258867	-1.17062	0.241752
CCDC9	102.145	-0.405831	0.516615	-0.785557	0.432127
CCDC90B	285.749	0.401872	0.3396	1.18337	0.236664
CCDC91	76.5746	0.335468	0.36344	0.923037	0.355988
CCDC92	123.009	-0.283632	0.292578	-0.969422	0.332335
CCDC92_1	85.7023	-0.227959	0.333012	-0.684535	0.493637
CCDC93	551.745	-0.141926	0.247017	-0.574561	0.565588
CCDC96	9.77415	0.264428	0.628365	0.420818	0.673888
CCDC97	142.035	-0.0919266	0.273624	-0.33596	0.736901
CCDC9B	16.3509	-0.132854	0.493154	-0.269397	0.787624
CCER2	64.9547	-0.933544	0.561274	-1.66326	0.0962606
CCER2_1	64.4352	-0.878104	0.549987	-1.59659	0.110357
CCHCR1	396.476	-0.551551	0.36805	-1.49858	0.133984
CCHCR1_1	321.714	-0.438217	0.385766	-1.13597	0.255971
CCHCR1_2	322.022	-0.438693	0.38529	-1.1386	0.254868
CCHCR1_3	460.092	-0.486225	0.38407	-1.26598	0.205521
CCHCR1_4	460.635	-0.482867	0.385881	-1.25134	0.210811
CCHCR1_5	380.297	-0.566179	0.393863	-1.4375	0.150576
CCKBR	73.464	0.222685	0.303795	0.733011	0.463552
CCL2	51.8198	0.756888	0.410972	1.8417	0.0655185
CCL20	35.9869	0.270005	0.393856	0.685542	0.493002
CCL23	35.6939	0.404985	0.446875	0.906259	0.364799
CCL23_1	16.0573	0.0773178	0.582074	0.132832	0.894326
CCL24	9.67077	-0.294518	0.63666	-0.4626	0.643651
CCL28	43.1816	0.683254	0.417215	1.63765	0.101494
CCL3	23.9571	0.33267	0.425894	0.78111	0.434738
CCL3_1	23.6055	0.371736	0.427745	0.869058	0.384815
CCL3_2	26.4345	0.160762	0.41428	0.388051	0.697978
CCL3L1	93.9572	0.00209724	0.338102	0.006203	0.995051
CCL3L3	52.3852	-0.0301017	0.402959	-0.0747016	0.940452
CCL3L3_1	52.8112	-0.0246913	0.398547	-0.0619534	0.9506
CCL3L3_2	57.1825	-0.0432642	0.392254	-0.110296	0.912174
CCL4L2	8.17968	1.3502	0.744081	1.81459	0.0695865
CCL4L2_1	8.17968	1.3502	0.744081	1.81459	0.0695865
CCL4L2_2	8.17968	1.3502	0.744081	1.81459	0.0695865
CCL5	1470.51	0.277857	0.24505	1.13388	0.256846
CCL5_1	1502.44	0.271982	0.24495	1.11036	0.266845
CCM2	267.334	-0.313242	0.546382	-0.573303	0.56644
CCNA1	101.346	-0.123801	0.31842	-0.388799	0.697425
CCNA2	1035.76	0.319918	0.262069	1.22074	0.222185
CCNB1	723.778	0.255087	0.255716	0.99754	0.318502
CCNB1IP1	459.898	-0.0290378	0.206034	-0.140937	0.88792
CCNB1IP1_1	451.18	-0.0255286	0.208482	-0.122449	0.902543
CCNB2	316.051	0.413803	0.316246	1.30849	0.190708
CCNC	389.387	0.407713	0.309157	1.31879	0.187239
CCND1	30.2596	0.235738	0.524752	0.449236	0.653261
CCND3	1113.51	0.321424	0.240025	1.33913	0.180529
CCNDBP1	130.218	0.0266346	0.260563	0.102219	0.918583
CCNE1	347.174	-0.335245	0.311371	-1.07667	0.281626
CCNE2	28.5171	0.409461	0.439164	0.932364	0.351148
CCNF	826.34	-0.413244	0.293275	-1.40907	0.158816
CCNG1	579.805	0.696741	0.391223	1.78093	0.074924
CCNG2	75.9118	0.579732	0.31295	1.85248	0.0639575
CCNH	279.139	0.590483	0.358706	1.64615	0.0997334
CCNI	1980.99	0.400934	0.276167	1.45178	0.146563
CCNJ	129.675	0.295286	0.280113	1.05417	0.291806
CCNJL	33.0374	0.438465	0.405135	1.08227	0.279133
CCNK	10.2116	0.446412	0.728531	0.612756	0.540038
CCNL1	4473.41	-0.0386194	0.242022	-0.15957	0.87322
CCNL2	2078.32	-0.531207	0.348023	-1.52636	0.126921
CCNO	36.3656	-0.451125	0.530367	-0.85059	0.394997
CCNQ	88.0854	-0.0145675	0.334902	-0.0434978	0.965305
CCNT1	347.236	0.102526	0.234118	0.437923	0.661442
CCNT2	808.166	0.130779	0.24748	0.528445	0.597191
CCNY	140.191	0.304246	0.308168	0.987275	0.323508
CCNYL1	108.019	0.359833	0.309622	1.16217	0.245166
CCP110	176.484	0.676013	0.351854	1.92129	0.0546955
CCPG1	171.578	0.539151	0.364446	1.47937	0.139041
CCR1	99.3619	0.623341	0.470283	1.32546	0.185018
CCR10	57.8731	-1.37153	0.763516	-1.79634	0.0724405
CCR2	100.774	0.337232	0.343478	0.981813	0.326192
CCR3	9.97915	-0.0636286	0.662431	-0.0960533	0.923478
CCRL2	10.6527	-0.423898	0.65512	-0.647054	0.517597
CCS	448.55	-1.026	0.503002	-2.03975	0.0413752
CCSAP	206.416	0.21729	0.317292	0.684826	0.493454
CCSER2	55.9418	0.352479	0.387396	0.909867	0.362893
CCT2	1227.18	0.189581	0.264655	0.716333	0.473786
CCT3	1957.76	-0.015188	0.182347	-0.0832919	0.933619
CCT4	1866.92	0.212842	0.26196	0.812497	0.416507
CCT5	4993.52	0.291303	0.276286	1.05435	0.291723
CCT6A	2480.81	0.122426	0.227077	0.53914	0.58979
CCT6B	10.4853	-0.129116	0.68644	-0.188096	0.850802
CCT6P1	304.801	-0.12807	0.271394	-0.471895	0.637001
CCT6P3	494.433	-0.435837	0.304971	-1.42911	0.152973
CCT7	1015.12	0.272013	0.34818	0.781244	0.434659
CCT8	3340.53	0.169979	0.229909	0.739332	0.459706
CCT8_1	3350.57	0.169232	0.229769	0.736531	0.461408
CCZ1	879.761	-0.0849841	0.226573	-0.375085	0.707597
CCZ1B	680.981	0.00538299	0.222471	0.0241964	0.980696
CCZ1P-OR7E38P	196.269	-0.21284	0.234934	-0.905955	0.36496
CD101	17.28	0.065637	0.480746	0.136532	0.891401
CD109	84.9151	0.480341	0.341319	1.40731	0.159337
CD14	13.1505	-0.776012	0.778912	-0.996277	0.319115
CD151	473.021	-0.705163	0.520127	-1.35575	0.175178
CD163L1	318.153	0.0584313	0.264306	0.221074	0.825035
CD164	655.467	0.940655	0.498144	1.88832	0.0589831
CD177	58.2029	0.0168542	0.390736	0.0431345	0.965594
CD180	118.531	0.247109	0.266629	0.926788	0.354037
CD1D	1027.02	-0.0116354	0.219438	-0.0530236	0.957713
CD22	14.4177	-0.807526	0.596073	-1.35474	0.175499
CD226	25.9848	0.484586	0.476016	1.018	0.308677
CD244	140.596	0.146323	0.260692	0.561286	0.574602
CD276	255.103	-0.182136	0.287362	-0.63382	0.526198
CD27-AS1	150.71	-0.133222	0.26538	-0.502006	0.615663
CD2AP	71.173	0.410977	0.383313	1.07217	0.283643
CD2BP2	397.325	0.0480625	0.285217	0.168512	0.86618
CD2BP2-DT	20.9211	0.188096	0.51145	0.36777	0.713044
CD300A	1176.25	-0.314275	0.245735	-1.27892	0.200925
CD300A_1	1161.48	-0.305994	0.248469	-1.23152	0.218129
CD300C	37.9579	0.432201	0.406604	1.06295	0.287804
CD300C_1	38.5462	0.470999	0.404864	1.16335	0.244687
CD300LB	188.453	0.128735	0.230546	0.558392	0.576577
CD300LB_1	194.008	0.11078	0.229227	0.483274	0.628901
CD300LF	629.407	-0.656822	0.367565	-1.78696	0.0739447
CD320	135.924	-0.632232	0.529701	-1.19356	0.232649
CD33	944.85	-0.250144	0.224197	-1.11573	0.264537
CD36	850.206	0.298994	0.257597	1.16071	0.245762
CD37	633.406	-0.262636	0.520416	-0.504665	0.613794
CD38	1186.72	0.0349531	0.195058	0.179193	0.857786
CD4	62.3653	0.267209	0.339999	0.785912	0.431919
CD44	2056.38	0.311422	0.254094	1.22562	0.220344
CD44-DT	10.3286	-0.575633	0.622277	-0.925044	0.354943
CD46	1190.38	0.315818	0.288343	1.09529	0.273391
CD47	668.656	0.493739	0.361555	1.3656	0.172065
CD48	39.6058	1.32443	0.472219	2.80469	0.00503657
CD52	292.953	0.632565	0.340467	1.85793	0.0631787
CD53	655.461	0.37932	0.271218	1.39858	0.16194
CD55	157.778	0.812815	0.441093	1.84273	0.0653687
CD58	156.856	0.560508	0.365043	1.53546	0.124671
CD59	44.6041	0.610262	0.443862	1.37489	0.169166
CD63	3273.77	0.200916	0.211346	0.950649	0.341783
CD63-AS1	20.6519	0.697483	0.519164	1.34347	0.179119
CD68	282.996	0.258129	0.387721	0.665758	0.505566
CD69	60.7494	0.321134	0.333167	0.963883	0.335104
CD70	1416.94	-0.022229	0.322278	-0.0689745	0.94501
CD72	53.7426	-0.586509	0.451574	-1.29881	0.194009
CD74	3094.58	0.491029	0.353219	1.39015	0.164482
CD79A	19.0481	0.876794	0.717273	1.2224	0.221557
CD81	956.422	0.296971	0.412709	0.719565	0.471793
CD82	171.133	-0.0640807	0.332201	-0.192897	0.847039
CD83	112.026	0.343033	0.33493	1.02419	0.305744
CD84	124.146	-0.143219	0.262908	-0.54475	0.585925
CD86	121.448	0.555606	0.311962	1.78101	0.0749115
CD9	13.3182	0.845848	0.650211	1.30088	0.193299
CD93	608.267	0.283938	0.268106	1.05905	0.289578
CD99	471.861	0.514406	0.37264	1.38044	0.167452
CD99_1	482.869	0.510062	0.367947	1.38624	0.165674
CD99L2	245.49	-0.153343	0.236405	-0.648644	0.516569
CD99P1	41.6669	-0.0397826	0.361041	-0.110189	0.91226
CD99P1_1	42.7697	-0.0605565	0.356457	-0.169885	0.865101
CDA	36.6489	0.0374709	0.403685	0.0928221	0.926045
CDADC1	188.589	0.0359878	0.256089	0.140528	0.888242
CDAN1	253.876	-0.416141	0.317981	-1.3087	0.190637
CDC123	325.721	0.231022	0.278691	0.828956	0.40713
CDC14A	89.641	0.606227	0.295562	2.0511	0.0402569
CDC14B	69.21	0.0904697	0.328604	0.275315	0.783074
CDC16	1990.85	-0.346664	0.261968	-1.3233	0.185734
CDC20	540.083	-0.0366837	0.336442	-0.109034	0.913175
CDC23	227.963	0.39533	0.350898	1.12662	0.259902
CDC25A	836.98	-0.142388	0.226636	-0.628269	0.529828
CDC25B	366.92	-0.219292	0.258062	-0.849764	0.395456
CDC25C	179.763	-0.249431	0.324491	-0.768686	0.44208
CDC26	165.288	-0.382047	0.297596	-1.28378	0.19922
CDC27	646.577	0.210018	0.255473	0.822074	0.411035
CDC27P10	48.4129	-0.627826	0.511082	-1.22842	0.219287
CDC27P10_1	41.3563	-0.535404	0.450347	-1.18887	0.234491
CDC27P9	15.307	-0.585912	0.519218	-1.12845	0.25913
CDC34	271.939	0.0942446	0.354937	0.265525	0.790605
CDC37	3193.06	-0.628758	0.43626	-1.44125	0.149515
CDC37L1	37.0493	0.705326	0.407607	1.73041	0.0835576
CDC40	131.84	0.382629	0.261797	1.46155	0.143865
CDC42	1126.49	0.542204	0.302241	1.79395	0.0728215
CDC42BPB	137.4	-0.274384	0.302663	-0.906568	0.364635
CDC42BPG	62.4825	-0.306914	0.426629	-0.719392	0.471899
CDC42EP2	13.5218	-0.60776	0.758941	-0.8008	0.423248
CDC42EP3	839.461	0.241585	0.237222	1.0184	0.30849
CDC42EP4	160.466	0.283177	0.314648	0.899981	0.36813
CDC42SE1	288.111	0.402428	0.281714	1.4285	0.153149
CDC42SE2	359.955	0.581785	0.324449	1.79315	0.0729488
CDC45	619.493	-0.434591	0.296005	-1.46819	0.142053
CDC5L	249.256	0.109664	0.229764	0.47729	0.633156
CDC6	466.851	-0.0150631	0.240878	-0.0625342	0.950137
CDC7	310.899	0.639225	0.339835	1.88099	0.0599735
CDC73	111.575	0.529925	0.348267	1.52161	0.128108
CDCA2	369.972	0.0465144	0.246479	0.188715	0.850316
CDCA3	696.286	-0.513727	0.291698	-1.76116	0.0782114
CDCA4	219.668	0.0777332	0.259916	0.299071	0.764886
CDCA5	861.087	-0.208873	0.230576	-0.905874	0.365003
CDCA7	1206.59	-0.0353871	0.213959	-0.165392	0.868636
CDCA7L	46.1681	0.4174	0.436916	0.955332	0.33941
CDCA8	648.364	0.0807346	0.198817	0.406076	0.684687
CDCP1	76.3683	0.24036	0.288679	0.832622	0.405058
CDH24	89.6417	-0.31786	0.329812	-0.96376	0.335166
CDH26	32.7493	0.0587188	0.398164	0.147474	0.882758
CDHR1	3496.92	-0.377673	0.275196	-1.37238	0.169945
CDIN1	72.7708	0.396397	0.301341	1.31544	0.188362
CDIP1	435.183	0.254071	0.266367	0.953837	0.340166
CDIP1_1	426.703	0.267669	0.266839	1.00311	0.315807
[truncated: 13,919 more rows]

## Sheet: RNAseq_K562
Supplementary Table S2B: RNA seq data of ACSL4 knockdown in K562 cells
Gene	baseMean	log2FoldChange	lfcSE	stat	pvalue
A1BG-AS1	13.9546	-0.462097	0.556397	-0.830517	0.406247
A2M	24.2087	-0.0630961	0.430979	-0.146402	0.883604
AAAS	1036.95	-0.0983916	0.102074	-0.963929	0.335082
AAAS_1	1017.81	-0.102041	0.101814	-1.00223	0.316234
AACS	357.357	-0.252444	0.133462	-1.8915	0.0585575
AACSP1	40.7415	-0.266832	0.343828	-0.776061	0.437713
AADAT	15.8172	0.361586	0.510014	0.708972	0.478342
AAGAB	1673.06	0.148105	0.0927031	1.59763	0.110126
AAK1	551.529	0.131435	0.115591	1.13707	0.255511
AAMDC	108.736	-0.0688433	0.214516	-0.320923	0.748268
AAMP	2049.6	-0.253984	0.102494	-2.47804	0.0132105
AAR2	699.937	-0.0845034	0.104759	-0.806643	0.419872
AARS1	5532.11	-0.0623582	0.0940199	-0.663245	0.507174
AARS2	772.521	-0.473908	0.133774	-3.5426	0.000396207
AASDH	258.246	0.195035	0.150768	1.29362	0.195798
AASDHPPT	1969.99	0.21703	0.101082	2.14706	0.0317888
AASS	103.036	-0.0957844	0.219752	-0.435874	0.662928
AATBC	14.322	-0.799697	0.556445	-1.43715	0.150675
AATF	2663.53	-0.0578476	0.0875684	-0.660599	0.508869
AATF_1	2698.4	-0.0574903	0.0879689	-0.653529	0.513415
ABALON	49.9475	-0.573598	0.304348	-1.88468	0.0594732
ABAT	46.3338	-0.225414	0.308252	-0.731268	0.464616
ABCA1	55.715	0.0966527	0.285129	0.338979	0.734625
ABCA11P	76.7396	0.170317	0.245803	0.692901	0.488372
ABCA2	316.113	-0.718034	0.206596	-3.47554	0.000509818
ABCA3	295.088	-0.421437	0.155626	-2.70801	0.00676873
ABCA6	13.173	0.12205	0.61231	0.199328	0.842006
ABCA7	762.66	-0.978708	0.183274	-5.34014	9.28764e-08
ABCA8	31.1373	-0.159148	0.37068	-0.429342	0.667674
ABCB1	202.933	0.230228	0.159177	1.44637	0.148074
ABCB10	1804.88	0.159096	0.105416	1.50922	0.131243
ABCB11	52.7857	-0.286097	0.302563	-0.945576	0.344365
ABCB11_1	36.8675	-0.212935	0.359507	-0.592296	0.553652
ABCB4	11.3679	-0.217991	0.599424	-0.363667	0.716107
ABCB6	909.027	-0.120582	0.114491	-1.0532	0.292249
ABCB7	1530.62	0.0673868	0.0916673	0.735124	0.462264
ABCB8	952.913	-0.733231	0.300376	-2.44104	0.014645
ABCB9	71.2277	-0.455793	0.256009	-1.78038	0.0750142
ABCC1	1458.36	-0.110686	0.0932614	-1.18684	0.23529
ABCC1_1	1453.91	-0.107666	0.0950363	-1.1329	0.257258
ABCC10	432.033	-0.399399	0.164121	-2.43356	0.0149511
ABCC3	31.2693	-0.0699486	0.373754	-0.187151	0.851542
ABCC4	2069.14	0.305063	0.093631	3.25814	0.00112145
ABCC5	1081.88	0.0835714	0.0960931	0.869693	0.384468
ABCD1	170.94	-0.955198	0.503097	-1.89864	0.0576123
ABCD3	890.794	0.191973	0.111052	1.72867	0.0838678
ABCD4	340.203	-0.140271	0.132762	-1.05656	0.290711
ABCE1	3929.16	0.272874	0.0938158	2.90862	0.00363027
ABCF1	4388.88	-0.0588075	0.0842977	-0.697617	0.485417
ABCF1_1	4547.61	-0.0508842	0.0842021	-0.604311	0.545637
ABCF1_2	4544.86	-0.0506088	0.0843313	-0.600119	0.548427
ABCF1_3	4382.23	-0.0594655	0.0842549	-0.705781	0.480324
ABCF1_4	4383.59	-0.059927	0.0841906	-0.711802	0.476588
ABCF1_5	4540.53	-0.0497272	0.0841543	-0.590905	0.554584
ABCF1_6	4552.52	-0.0502113	0.0842625	-0.595892	0.551248
ABCF1-DT	11.8916	-0.178775	0.615183	-0.290604	0.771354
ABCF2	803.371	0.0398279	0.108766	0.366179	0.714231
ABCF3	552.841	-0.0847055	0.115607	-0.732703	0.46374
ABCG2	120.354	0.112237	0.218174	0.514439	0.606945
ABHD10	237.331	0.199398	0.158425	1.25863	0.208165
ABHD11	241.386	-0.29502	0.155927	-1.89204	0.0584856
ABHD12	299.475	-0.160322	0.148313	-1.08097	0.27971
ABHD12B	10.841	0.140191	0.691603	0.202704	0.839366
ABHD13	278.75	0.180939	0.144258	1.25427	0.209743
ABHD14A	45.6448	-0.614153	0.325813	-1.88498	0.0594319
ABHD14B	876.539	-0.229842	0.112082	-2.05066	0.0403003
ABHD15	75.128	-0.144413	0.259517	-0.556468	0.577891
ABHD16A	562.697	-0.18686	0.118414	-1.57802	0.114562
ABHD16A_1	574.825	-0.178984	0.119906	-1.4927	0.135516
ABHD16A_2	574.146	-0.178943	0.119788	-1.49383	0.13522
ABHD16A_3	566.945	-0.179726	0.118627	-1.51505	0.129759
ABHD16A_4	574.146	-0.178943	0.119788	-1.49383	0.13522
ABHD16A_5	600.541	-0.172979	0.121696	-1.4214	0.1552
ABHD16A_6	593.495	-0.185395	0.12475	-1.48613	0.137244
ABHD17A	475.883	-1.42311	0.500134	-2.84546	0.00443473
ABHD17B	373.021	0.143538	0.132246	1.08539	0.277749
ABHD18	367.576	0.19397	0.127094	1.52619	0.126962
ABHD2	6555.1	0.0206673	0.0820345	0.251935	0.801092
ABHD3	382.512	0.230201	0.129387	1.77917	0.0752117
ABHD4	322.058	-0.0926971	0.135852	-0.682337	0.495026
ABHD5	1528.05	0.0763032	0.0949917	0.803262	0.421823
ABHD6	155.36	-0.0178012	0.187289	-0.0950466	0.924278
ABHD8	45.5705	-0.801064	0.411385	-1.94724	0.0515065
ABI1	1265.49	0.226451	0.103155	2.19526	0.0281451
ABI2	1211.92	0.175108	0.100074	1.74979	0.0801547
ABITRAM	482.487	0.146877	0.129064	1.13802	0.255114
ABL1	4747.03	-0.380045	0.116246	-3.26932	0.00107805
ABL2	1388.4	0.130287	0.112559	1.1575	0.247068
ABLIM1	657.77	0.157024	0.117685	1.33428	0.182113
ABO	924.96	-0.150582	0.102053	-1.47553	0.14007
ABO_1	921.555	-0.0768297	0.102051	-0.752854	0.451538
ABR	595.916	-0.352172	0.129989	-2.70924	0.00674383
ABR_1	587.027	-0.330358	0.127365	-2.5938	0.00949225
ABR_2	580.431	-0.296077	0.127999	-2.31312	0.0207162
ABRACL	454.481	0.101181	0.122523	0.825811	0.408912
ABRAXAS1	475.455	0.137534	0.141205	0.974005	0.330054
ABRAXAS2	493.733	0.166755	0.117563	1.41843	0.156065
ABT1	639.789	-0.320489	0.142145	-2.25467	0.0241543
ABT1_1	756.323	-0.429274	0.14785	-2.90345	0.00369078
ABTB1	14.8883	-1.10455	0.578138	-1.91054	0.0560643
ABTB2	66.8924	-0.0718574	0.276885	-0.259521	0.795233
ACAA1	511.609	-0.224098	0.124283	-1.80312	0.0713694
ACAA2	1061.52	0.12992	0.100009	1.29908	0.193917
ACACA	3466.02	0.121016	0.0827265	1.46285	0.143509
ACACA_1	3452.04	0.119774	0.0828525	1.44563	0.148282
ACACB	18.2049	-0.333248	0.479402	-0.695132	0.486972
ACAD10	258.746	-0.27623	0.144426	-1.9126	0.0557987
ACAD8	537.28	-0.0191242	0.116793	-0.163745	0.869932
ACAD9	509.831	-0.0656827	0.128131	-0.512623	0.608215
ACAD9-DT	32.8067	-0.201966	0.364982	-0.55336	0.580017
ACADM	2105.76	0.175121	0.0977157	1.79215	0.0731097
ACADS	77.4518	-1.25429	0.283369	-4.42635	9.58396e-06
ACADSB	455.655	0.145898	0.119299	1.22296	0.221343
ACADVL	3176.93	-0.105473	0.0946714	-1.1141	0.265238
ACAN	14.4432	-4.8736	2.27945	-2.13806	0.0325118
ACAP1	33.1198	-0.924706	0.366451	-2.52341	0.0116223
ACAP1_1	32.3921	-0.906747	0.368398	-2.46133	0.0138425
ACAP2	1274.54	0.223948	0.0987203	2.26851	0.0232983
ACAP3	342.218	-0.834414	0.210986	-3.95483	7.65885e-05
ACAT1	1459.11	0.179645	0.104498	1.71912	0.0855928
ACAT2	1168.43	0.122173	0.0957349	1.27616	0.201899
ACBD3	628.238	-0.0170901	0.116537	-0.14665	0.883409
ACBD4	81.8169	-0.583372	0.262196	-2.22495	0.0260848
ACBD5	359.051	0.142099	0.133687	1.06292	0.287816
ACBD6	963.405	-0.0329589	0.101086	-0.326047	0.744389
ACBD7	43.1883	0.121741	0.324803	0.374814	0.707798
ACCS	300.399	-0.13736	0.147704	-0.929968	0.352387
ACD	259.892	-0.663808	0.182963	-3.6281	0.000285516
ACE	220.768	-0.522454	0.185388	-2.81816	0.00482995
ACE2	24.4504	-0.113001	0.425424	-0.265619	0.790532
ACER2	53.2067	-0.220604	0.304553	-0.724352	0.46885
ACER3	769.247	0.224914	0.104107	2.16041	0.030741
ACHE	34.4166	-1.13866	0.370406	-3.07407	0.00211157
ACIN1	3127.89	-0.123727	0.0960422	-1.28826	0.197656
ACKR2	189.031	-0.0393191	0.165977	-0.236895	0.812739
ACLY	5386.35	-0.0247619	0.0765695	-0.323391	0.746399
ACO1	783.886	0.112183	0.103385	1.0851	0.277878
ACO2	1203.33	-0.266883	0.12	-2.22404	0.026146
ACOT11	63.7592	-0.422474	0.291698	-1.44833	0.147526
ACOT13	650.252	0.0581595	0.114769	0.506753	0.612328
ACOT7	709.537	-0.557405	0.152263	-3.66079	0.000251436
ACOT8	115.02	-0.430344	0.219444	-1.96106	0.0498715
ACOT9	870.174	0.0865403	0.105152	0.823002	0.410507
ACOX1	887.85	0.0827484	0.102744	0.805384	0.420598
ACOX3	170.419	-0.237677	0.180961	-1.31341	0.189043
ACOXL	162.809	0.113739	0.173972	0.65378	0.513253
ACP1	2351.58	0.151725	0.0863396	1.7573	0.078866
ACP2	244.34	-0.241335	0.161717	-1.49233	0.135614
ACP3	39.0594	-0.0290659	0.328621	-0.0884481	0.929521
ACP5	387.819	-0.456295	0.14517	-3.14318	0.00167121
ACP6	136.998	0.0565557	0.196121	0.288372	0.773062
ACRBP	82.057	-0.154925	0.234168	-0.6616	0.508228
ACSF2	177.369	-0.184053	0.174634	-1.05394	0.291912
ACSF3	468.112	-0.53567	0.159168	-3.36544	0.00076423
ACSL1	986.361	0.0316374	0.105202	0.300729	0.763621
ACSL3	2931.6	0.171648	0.0990942	1.73218	0.0832423
ACSL4	743.622	-1.19289	0.114495	-10.4187	2.03783e-25
ACSL5	66.6318	0.191422	0.272685	0.701991	0.482685
ACSL6	233.918	-0.0435873	0.158358	-0.275246	0.783128
ACSM1	65.1707	0.100632	0.271299	0.370925	0.710693
ACSM3	3441.98	0.0845524	0.11251	0.751512	0.452344
ACSS1	510.982	-0.10389	0.121216	-0.857063	0.39141
ACSS2	845.8	0.00940775	0.103364	0.0910158	0.92748
ACTB	38596.3	-0.199846	0.0926789	-2.15632	0.0310583
ACTG1	12249.5	-0.357943	0.100442	-3.56366	0.000365719
ACTG1_1	12055	-0.359864	0.0996313	-3.61196	0.000303893
ACTG1P20	49.4273	-0.0645696	0.321446	-0.200872	0.840798
ACTL6A	1130.17	0.113666	0.101308	1.12198	0.261871
ACTL8	115.196	-0.3935	0.21493	-1.83083	0.0671265
ACTMAP	348.864	-0.32445	0.137544	-2.35889	0.0183297
ACTN1	1526.48	-0.151898	0.102626	-1.48011	0.138845
ACTN2	41.0545	0.15883	0.341166	0.465551	0.641537
ACTN4	6113.33	-0.573607	0.130574	-4.39295	1.11823e-05
ACTN4_1	6092.31	-0.568431	0.130879	-4.34319	1.40427e-05
ACTR10	499.246	0.161732	0.125248	1.29129	0.196602
ACTR1A	1601.72	-0.0837065	0.0959362	-0.872522	0.382924
ACTR1B	392.93	-0.43522	0.14243	-3.05567	0.00224559
ACTR1B_1	383.32	-0.430576	0.14195	-3.03331	0.00241891
ACTR2	10431.4	0.18336	0.0883667	2.07499	0.0379876
ACTR3	6805.37	0.11987	0.0831859	1.44099	0.149587
ACTR3B	390.93	0.0379238	0.126761	0.299176	0.764806
ACTR3C	255.608	0.17149	0.150427	1.14002	0.254279
ACTR5	202.879	0.08003	0.175314	0.456495	0.648034
ACTR6	442.35	0.255678	0.140239	1.82316	0.0682786
ACTR8	593.632	0.00654424	0.114424	0.0571928	0.954392
ACVR1	387.416	-0.0220158	0.129965	-0.169398	0.865484
ACVR1B	535.939	0.00094483	0.11858	0.00796786	0.993643
ACVR1C	17.2251	0.668486	0.507451	1.31734	0.187725
ACVR2A	68.2934	0.0910622	0.256198	0.355437	0.722262
ACVR2B	846.677	0.0360396	0.129417	0.278476	0.780647
ACVR2B-AS1	13.5776	-0.107316	0.559645	-0.191757	0.847932
ACVRL1	50.0279	-0.680684	0.30535	-2.22919	0.0258012
ACYP1	213.092	0.200732	0.156838	1.27987	0.20059
ACYP2	46.7456	-0.113119	0.313939	-0.360321	0.718607
ADA	336.905	-0.152471	0.14336	-1.06355	0.287532
ADAL	360.892	0.118509	0.145437	0.81485	0.415158
ADAM10	2493.32	0.205879	0.0939672	2.19096	0.0284544
ADAM11	12.4412	-0.850842	0.633185	-1.34375	0.17903
ADAM15	28.6037	-1.4696	0.454198	-3.23559	0.00121393
ADAM17	835.006	0.136415	0.109349	1.24752	0.212206
ADAM19	280.906	0.0591296	0.141173	0.418844	0.67533
ADAM20	10.3446	0.3429	0.667783	0.513491	0.607608
ADAM22	15.0362	0.100003	0.574239	0.174148	0.861749
ADAM8	228.431	-1.05752	0.223634	-4.7288	2.25848e-06
ADAM9	1062.02	0.125817	0.115096	1.09315	0.27433
ADAM9_1	315.76	0.191966	0.163134	1.17674	0.239301
ADAMTS10	59.077	-0.853946	0.297315	-2.87219	0.0040764
ADAMTS14	406.531	-0.528068	0.162654	-3.24658	0.00116801
ADAMTS3	537.682	0.123798	0.116421	1.06337	0.287616
ADAMTS4	11.9264	-0.75755	0.600414	-1.26171	0.207052
ADAMTS6	27.7299	0.0102622	0.389899	0.0263203	0.979002
ADAMTS9	14.9399	0.178878	0.535692	0.33392	0.73844
ADAMTSL4	2059.56	-0.608818	0.13453	-4.52551	6.02499e-06
ADAMTSL4-AS2	12.3031	-0.0787959	0.58275	-0.135214	0.892443
ADAMTSL5	76.5491	-0.263784	0.267252	-0.987025	0.32363
ADAP1	11.9317	-1.11902	0.622788	-1.7968	0.072368
ADAR	5978.97	0.110398	0.081836	1.34902	0.177332
ADARB1	222.221	-0.0349343	0.161055	-0.21691	0.828279
ADAT1	496.678	0.0537395	0.118076	0.455126	0.649019
ADAT2	875.511	0.174812	0.104986	1.6651	0.0958927
ADAT3	14.6004	-1.95577	0.672383	-2.90872	0.00362913
ADCK1	119.531	-0.235007	0.217143	-1.08227	0.279133
ADCK2	86.2376	-0.189576	0.235745	-0.804156	0.421307
ADCK5	80.6666	-1.03991	0.330298	-3.14841	0.00164162
ADCK5_1	79.0154	-1.02081	0.332896	-3.06644	0.00216624
ADCY10	31.3157	0.25175	0.385973	0.652247	0.514242
ADCY10P1	28.1611	0.0426636	0.404987	0.105346	0.916102
ADCY3	424.311	-0.341927	0.140943	-2.426	0.0152664
ADCY6	475.709	-0.174551	0.127249	-1.37173	0.170147
ADCY7	634.706	-0.455533	0.150019	-3.03649	0.00239347
ADCY9	267.438	-0.192683	0.143544	-1.34233	0.179489
ADD1	2581.5	-0.0619331	0.09095	-0.680957	0.495899
ADD2	1509.75	-0.11212	0.0953162	-1.1763	0.239475
ADD3	1014.83	0.262782	0.109006	2.41071	0.0159213
ADGRA3	567.355	0.159418	0.117631	1.35523	0.175343
ADGRB2	43.2589	-0.795719	0.33822	-2.35267	0.0186393
ADGRB3	34.3945	0.168283	0.354208	0.475096	0.634718
ADGRD1	180.843	-0.220806	0.191787	-1.15131	0.249605
ADGRD1-AS1	45.7076	0.050487	0.308645	0.163576	0.870065
ADGRE2	430.453	0.0658091	0.131429	0.500721	0.616567
ADGRE5	828.517	-0.37233	0.129957	-2.86503	0.00416971
ADGRG1	20.5588	-0.582219	0.484566	-1.20153	0.229547
ADGRG6	1473.6	0.164374	0.102328	1.60635	0.108197
ADGRL1	673.898	-0.62799	0.157265	-3.99321	6.5186e-05
ADGRL1_1	659.514	-0.647199	0.158761	-4.07656	4.57072e-05
ADGRL1-AS1	39.9653	-0.124778	0.328343	-0.380024	0.703927
ADGRL1-AS1_1	40.0998	-0.112263	0.329199	-0.341018	0.73309
ADGRL3	11.9218	0.122386	0.595484	0.205523	0.837164
ADGRV1	944.505	0.149176	0.124155	1.20154	0.229543
ADH5	2000.99	0.152787	0.0905363	1.68758	0.0914927
ADH6	23.9715	0.151837	0.429306	0.35368	0.723579
ADI1	762.818	0.0261135	0.104817	0.249134	0.803257
ADI1_1	584.809	0.0318463	0.113621	0.280284	0.779259
ADIPOR1	2489.88	0.10208	0.0844369	1.20895	0.226682
ADIPOR2	1770.85	0.140603	0.090166	1.55938	0.118908
ADIPOR2_1	1729.44	0.147865	0.0904128	1.63544	0.101957
ADISSP	362.405	-0.864682	0.206853	-4.18018	2.91283e-05
ADK	600.287	0.170823	0.120543	1.41711	0.156452
ADM2	45.5507	-0.651549	0.313745	-2.07668	0.0378307
ADM5	12.885	-1.10781	0.648861	-1.70731	0.0877639
ADNP	1603.57	0.183337	0.099401	1.84442	0.0651216
ADNP2	1163.19	0.0536506	0.0941684	0.569731	0.56886
ADO	476.673	0.136611	0.124587	1.09651	0.272855
ADORA2B	110.152	0.124364	0.207616	0.599007	0.549168
ADPGK	830.009	0.119232	0.108749	1.09639	0.272906
ADPRH	89.8153	0.182168	0.228638	0.796754	0.425594
ADPRHL1	67.0579	-0.0979466	0.271647	-0.360566	0.718424
ADPRM	65.6609	-0.127622	0.278585	-0.458108	0.646875
ADPRS	339.999	-0.174995	0.138836	-1.26045	0.207509
ADRB2	22.9708	-0.187933	0.442617	-0.424595	0.671132
ADRM1	837.537	-0.799676	0.34624	-2.3096	0.0209102
ADSL	2167.24	0.0194694	0.0852933	0.228264	0.819441
ADSS1	50.6842	-0.00281877	0.318461	-0.00885124	0.992938
ADSS2	1725.19	0.312216	0.107364	2.90801	0.00363737
ADTRP	438.874	0.0962516	0.124047	0.775927	0.437792
AEBP1	125.141	-0.496557	0.239348	-2.07463	0.0380211
AEBP2	387.24	0.251351	0.137591	1.8268	0.0677297
AEN	1081.95	-0.136561	0.136356	-1.00151	0.316581
AFAP1	126.846	0.251332	0.198394	1.26683	0.205216
AFAP1-AS1	231.485	-0.0612705	0.153262	-0.399776	0.689322
AFDN	2985.03	0.0375828	0.0855386	0.439367	0.660396
AFDN-DT	22.7951	-0.186979	0.428672	-0.436182	0.662705
AFF1	2142.01	-0.048824	0.0871518	-0.560218	0.575331
AFF1-AS1	22.9289	-0.890156	0.458231	-1.94259	0.0520655
AFF2	13.1469	0.341826	0.610701	0.559727	0.575665
AFF3	23.359	-0.270115	0.45493	-0.59375	0.552679
AFF4	2043.22	0.165706	0.100439	1.64981	0.098981
AFG1L	140.925	0.225334	0.19457	1.15811	0.246817
AFG3L1P	583.228	-0.105078	0.124763	-0.842225	0.399662
AFG3L2	1606.12	0.149552	0.0943675	1.58478	0.113016
AFMID	560.845	-0.028216	0.12252	-0.230297	0.817861
AFP	20.5894	-0.074663	0.48841	-0.15287	0.878501
AFTPH	750.628	0.052852	0.119028	0.444031	0.65702
AGA	126.772	0.261985	0.197432	1.32696	0.18452
AGA-DT	46.2348	0.184691	0.311232	0.593422	0.552899
AGAP1	1106.97	-0.106034	0.0998165	-1.06229	0.288104
AGAP10P	138.439	0.0285453	0.196489	0.145277	0.884492
AGAP11	175.855	-0.348502	0.172814	-2.01663	0.043734
AGAP12P	197.936	-0.270272	0.16715	-1.61694	0.105891
AGAP12P_1	197.936	-0.270272	0.16715	-1.61694	0.105891
AGAP13P	155.25	-0.0485271	0.185877	-0.261071	0.794037
AGAP14P	80.3378	-0.146137	0.247063	-0.591498	0.554187
AGAP2-AS1	11.7279	-1.53035	0.619151	-2.47169	0.0134478
AGAP3	1122.85	-0.637301	0.160921	-3.96034	7.48436e-05
AGAP4	26.098	0.254639	0.405091	0.628598	0.529612
AGAP6	22.6624	-0.399789	0.451618	-0.885238	0.376028
AGAP7P	241.472	-0.446302	0.169363	-2.63517	0.00840941
AGBL3	44.7359	0.0676484	0.321167	0.210633	0.833173
AGBL5	899.205	-0.0763307	0.104416	-0.731023	0.464765
AGER	110.878	-0.333618	0.222463	-1.49966	0.133704
AGER_1	106.773	-0.297539	0.229743	-1.2951	0.195287
AGER_2	110.036	-0.29869	0.224837	-1.32847	0.184023
AGER_3	114.907	-0.337491	0.221302	-1.52503	0.127253
AGER_4	106.773	-0.297539	0.229743	-1.2951	0.195287
AGER_5	114.616	-0.338594	0.220077	-1.53852	0.123921
AGER_6	112.482	-0.363527	0.223475	-1.6267	0.1038
AGFG1	1795.97	0.173222	0.0875543	1.97845	0.0478778
AGFG2	167.321	-0.377423	0.196942	-1.91641	0.0553125
AGGF1	985.351	0.208581	0.116358	1.79258	0.0730408
AGK	999.085	0.154053	0.0973883	1.58184	0.113686
AGK_1	620.02	0.140902	0.112477	1.25272	0.210307
AGL	1673.51	0.20434	0.111541	1.83197	0.0669558
AGMO	35.7212	-0.14023	0.376628	-0.37233	0.709647
AGO1	2699.64	0.0978681	0.0890126	1.09949	0.271556
AGO2	2158.5	0.0974994	0.0896741	1.08726	0.27692
AGO3	803.318	0.208585	0.109532	1.90434	0.0568658
AGO4	487.286	0.108169	0.123738	0.874178	0.382021
AGPAT1	2543.84	-0.102731	0.102926	-0.998098	0.318232
AGPAT1_1	2405.74	-0.124489	0.101503	-1.22646	0.220027
AGPAT1_2	2617.76	-0.0995253	0.100846	-0.986905	0.323689
AGPAT1_3	2414.55	-0.109513	0.102422	-1.06923	0.284968
AGPAT1_4	2617.42	-0.0988291	0.100801	-0.980438	0.32687
AGPAT1_5	2617.58	-0.0989965	0.100838	-0.981741	0.326227
AGPAT1_6	2413.77	-0.124307	0.10168	-1.22254	0.221504
AGPAT2	314.299	-1.21307	0.226156	-5.36385	8.14671e-08
AGPAT3	1264.55	-0.247014	0.112359	-2.19843	0.0279184
AGPAT4	591.539	0.0981227	0.111831	0.877423	0.380257
AGPAT4-IT1	25.3412	-0.28963	0.40649	-0.712515	0.476146
AGPAT5	1666.06	0.187074	0.102485	1.82538	0.0679443
AGPAT5_1	1638.83	0.196277	0.103603	1.89452	0.0581565
AGPS	1948.48	0.210383	0.103467	2.03333	0.0420191
AGRN	952.008	-1.28674	0.439967	-2.92462	0.00344881
AGTPBP1	279.675	0.183751	0.148511	1.23729	0.215978
AGTRAP	463.051	-0.696341	0.15779	-4.41308	1.01909e-05
AHCTF1	4778.33	0.204774	0.0926662	2.2098	0.0271192
AHCTF1P1	1404.38	0.250792	0.10976	2.28492	0.0223178
AHCY	4266.44	-0.204359	0.0939426	-2.17536	0.0296032
AHCYL1	2187.72	0.0921846	0.0933455	0.987564	0.323366
AHCYL2	493.317	0.12191	0.119256	1.02225	0.306663
AHDC1	363.399	-1.04665	0.222653	-4.70079	2.59153e-06
AHI1	437.718	0.181739	0.132631	1.37027	0.170604
AHNAK	4972.33	-0.000412555	0.0863636	-0.00477696	0.996189
AHR	343.831	0.189159	0.150111	1.26013	0.207623
AHSA1	2126.8	-0.0665972	0.0926116	-0.719102	0.472078
AHSA2P	828.693	-0.00188738	0.102998	-0.0183245	0.98538
AHSP	12.4293	0.136346	0.576771	0.236396	0.813126
AIDA	2487.35	0.240459	0.0982828	2.4466	0.014421
AIF1	334.018	0.158191	0.161465	0.979725	0.327222
AIF1_1	332.532	0.158098	0.16168	0.977842	0.328152
AIF1_2	312.062	0.152556	0.164962	0.924798	0.355071
AIF1_3	306.997	0.132234	0.165377	0.79959	0.423948
AIF1_4	332.532	0.158098	0.16168	0.977842	0.328152
AIF1_5	333.756	0.146724	0.161129	0.910597	0.362508
AIF1L	199.313	0.0917854	0.164314	0.558599	0.576436
AIFM1	3622.1	0.0530577	0.0805289	0.658865	0.509982
AIFM2	332.102	-0.242634	0.154582	-1.56961	0.116506
AIG1	939.717	0.155399	0.112132	1.38586	0.165789
AIMP1	1091.16	0.176332	0.107442	1.64119	0.100758
AIMP2	294.699	-0.208847	0.16045	-1.30164	0.19304
AIP	410.215	-0.694932	0.177363	-3.91814	8.92356e-05
AJM1	25.0575	-1.57502	0.514702	-3.06006	0.00221291
AJUBA	48.7204	0.0197319	0.316485	0.0623472	0.950286
AK2	8012.04	0.0633126	0.0768375	0.823981	0.40995
AK4	1766.92	0.203379	0.100802	2.0176	0.0436324
AK6	592.48	0.234961	0.122231	1.92227	0.0545713
AK6_1	591.914	0.232924	0.121096	1.92347	0.0544213
AK6_2	593.697	0.243287	0.121486	2.0026	0.04522
AK9	38.6864	-0.0909452	0.336175	-0.270529	0.786753
AKAP1	1345.67	-0.0996254	0.0976669	-1.02005	0.307703
AKAP10	337.128	0.172952	0.138305	1.25051	0.211112
AKAP11	3663.84	0.205018	0.101121	2.02746	0.0426157
AKAP12	442.605	0.0136685	0.131534	0.103917	0.917236
AKAP13	90.0143	0.164907	0.223928	0.736429	0.46147
AKAP17A	565.119	-0.330099	0.147972	-2.23083	0.0256926
AKAP17A_1	580.299	-0.31813	0.148432	-2.14328	0.032091
AKAP3	11.8634	0.0950431	0.610287	0.155735	0.876242
AKAP5	14.3006	0.437483	0.53973	0.810559	0.417619
AKAP6	33.3559	0.440851	0.376339	1.17142	0.241429
AKAP7	149.979	0.203697	0.188553	1.08032	0.280002
AKAP8	717.736	-0.248873	0.124618	-1.99708	0.0458162
AKAP8L	1244.48	-0.222905	0.106173	-2.09945	0.0357775
AKAP9	2339.56	0.167151	0.114047	1.46563	0.142749
AKIP1	368.501	-0.151173	0.137744	-1.09749	0.272427
AKIRIN1	2609.66	0.137749	0.0872547	1.5787	0.114405
AKIRIN2	642.241	0.0551546	0.110861	0.497511	0.618829
AKNA	93.2095	-0.75903	0.238653	-3.18048	0.00147034
AKR1A1	712.922	-0.128329	0.114254	-1.12319	0.261355
AKR1C1	669.719	0.070046	0.110013	0.636706	0.524316
AKR1C2	326.53	0.106676	0.13647	0.781681	0.434402
AKR1C3	129.358	0.12561	0.195445	0.64269	0.520425
AKR7A2	559.035	-0.304805	0.12361	-2.46585	0.0136688
AKR7L	22.4066	-0.00971753	0.443087	-0.0219314	0.982503
AKT1	1622.75	-0.43612	0.135526	-3.21798	0.00129095
AKT1S1	572.491	-0.414729	0.138629	-2.99165	0.00277479
AKT2	1517.82	-0.418855	0.127488	-3.28545	0.00101821
AKT3	26.8798	-0.0234524	0.394035	-0.0595186	0.952539
AKT3_1	25.4299	-0.0746157	0.403767	-0.184799	0.853387
AKTIP	98.5518	-0.0108352	0.214454	-0.0505245	0.959704
ALAD	421.555	-0.0866475	0.127791	-0.678041	0.497746
ALAS1	821.109	-0.00701108	0.108569	-0.0645774	0.94851
ALAS2	2215.82	-0.120248	0.0942514	-1.27582	0.202019
ALDH16A1	225.314	-1.00963	0.476607	-2.11836	0.0341442
ALDH18A1	1693.23	0.117852	0.0876403	1.34472	0.178714
ALDH1A1	101.577	0.0466746	0.236135	0.19766	0.843311
ALDH1A2	2432.77	0.0501901	0.0880447	0.570053	0.568642
ALDH1A3-AS1	13.1651	-0.457043	0.556118	-0.821844	0.411166
ALDH1B1	1273.07	-0.0827494	0.102269	-0.809131	0.41844
ALDH1L2	288.132	0.166375	0.226725	0.733818	0.46306
ALDH2	604.622	-0.105033	0.117142	-0.896623	0.36992
ALDH3A2	17.324	0.169549	0.507512	0.33408	0.738319
ALDH3B1	10.628	-0.237578	0.640522	-0.370912	0.710703
ALDH4A1	222.276	-0.616708	0.190878	-3.23089	0.00123404
ALDH5A1	402.043	-0.00806359	0.12424	-0.0649032	0.948251
ALDH6A1	278.785	-0.0842937	0.143497	-0.587427	0.556917
ALDH9A1	1149.08	0.148391	0.0991118	1.4972	0.13434
ALDOA	338.03	-2.34212	0.889521	-2.63301	0.00846329
ALDOC	181.586	-0.0915294	0.178334	-0.513248	0.607778
ALG1	179.38	-0.184321	0.172935	-1.06584	0.286497
ALG10	229.534	0.126293	0.163706	0.771465	0.440431
ALG10B	451.057	0.27331	0.142688	1.91543	0.0554374
ALG11	141.003	0.13982	0.18938	0.738302	0.460331
ALG12	177.355	-0.392185	0.216085	-1.81495	0.0695308
ALG13	780.778	0.151263	0.113528	1.33238	0.182734
ALG14	93.3786	0.279775	0.230564	1.21344	0.224961
ALG2	501.623	0.0883816	0.122237	0.723036	0.469658
ALG3	632.427	-0.157164	0.12054	-1.30383	0.192292
ALG5	441.828	0.0850916	0.139047	0.611962	0.540563
ALG6	343.251	0.166375	0.152235	1.09288	0.274445
ALG8	1367.34	0.180531	0.0991244	1.82126	0.0685673
ALG9	539.056	0.209699	0.119631	1.75289	0.0796215
ALKBH1	250.232	0.0429016	0.152016	0.282218	0.777776
ALKBH2	227.496	-0.06097	0.175611	-0.347189	0.728449
ALKBH3	124.231	0.0463271	0.197487	0.234582	0.814533
ALKBH4	180.091	-0.435351	0.181148	-2.40329	0.0162484
ALKBH5	756.186	-0.249439	0.126685	-1.96897	0.0489564
ALKBH6	253.846	-0.227372	0.172701	-1.31656	0.187986
ALKBH7	76.99	-1.37372	0.290086	-4.73557	2.18437e-06
ALKBH8	254.06	0.159628	0.152927	1.04382	0.29657
ALMS1	791.396	0.286523	0.115305	2.48491	0.0129585
ALMS1_1	775.642	0.289313	0.115492	2.50506	0.0122432
ALMS1-IT1	60.4292	0.149106	0.284566	0.523975	0.600296
ALMS1-IT1_1	59.6437	0.128343	0.28631	0.448265	0.653962
ALOX12	46.4189	-0.480583	0.314759	-1.52683	0.126803
ALOX12-AS1	23.4582	0.36799	0.462467	0.795711	0.4262
ALOX5	174.618	-0.182416	0.179092	-1.01856	0.30841
ALOX5_1	172.535	-0.181298	0.180611	-1.00381	0.315471
ALPK1	41.9483	0.358389	0.3236	1.10751	0.268075
ALPK2	47.1874	0.0904351	0.307177	0.294407	0.768447
ALPK3	26.2631	-0.165837	0.407753	-0.40671	0.684221
ALS2	980.992	0.103221	0.112867	0.914535	0.360436
ALX3	67.4129	-0.159652	0.255412	-0.625077	0.531921
ALX4	85.4567	-0.262008	0.238686	-1.09771	0.272331
ALYREF	1303.68	-0.435133	0.116664	-3.7298	0.000191629
AMACR	11.1344	-0.161593	0.610564	-0.264662	0.791269
AMBRA1	812.475	-0.0999594	0.111446	-0.896928	0.369757
AMD1	2678.53	0.201978	0.0908757	2.22257	0.0262448
AMDHD2	160.032	-1.71811	0.561481	-3.05997	0.00221359
AMER1	206.575	0.0879268	0.164291	0.535191	0.592518
AMFR	1492.94	-0.071234	0.0914605	-0.77885	0.436068
AMH	17.689	-2.04543	0.685989	-2.98173	0.00286623
AMHR2	236.339	-0.176672	0.174903	-1.01011	0.312442
AMIGO1	59.4731	-0.0506292	0.272059	-0.186097	0.852369
AMIGO2	87.3909	0.249559	0.231924	1.07604	0.281911
AMIGO3	35.7276	-1.2227	0.394347	-3.10057	0.00193151
AMMECR1	3539.66	0.1687	0.0906844	1.8603	0.0628437
AMMECR1L	754.881	0.0109809	0.102965	0.106647	0.915069
AMN1	66.5078	0.045748	0.257953	0.17735	0.859233
AMOTL1	3950.54	-0.00287921	0.0779133	-0.0369541	0.970522
AMOTL2	41.2046	-0.293931	0.347259	-0.846432	0.397312
AMPD2	711.483	-0.435977	0.139395	-3.12764	0.00176214
AMPD3	433.24	-0.0476275	0.121215	-0.392918	0.69438
AMT	21.2115	0.305767	0.444157	0.688419	0.491189
AMY2B	32.5409	0.228396	0.373282	0.61186	0.540631
AMZ1	43.348	-0.132888	0.318287	-0.417509	0.676306
AMZ2	643.903	-0.00504391	0.110102	-0.0458113	0.963461
AMZ2P1	65.9024	0.187019	0.303303	0.616607	0.537494
ANAPC1	3322.75	0.164037	0.0907688	1.80719	0.070732
ANAPC10	247.065	0.200325	0.160596	1.24739	0.212256
ANAPC11	539.753	-0.798813	0.187063	-4.27029	1.9522e-05
ANAPC13	734.526	0.258429	0.125503	2.05915	0.0394799
ANAPC15	134.694	-0.230746	0.197815	-1.16647	0.243424
ANAPC16	1025.02	0.105866	0.101342	1.04464	0.29619
ANAPC1P1	179.419	0.239764	0.17876	1.34126	0.179835
ANAPC1P2	887.848	0.0874928	0.106429	0.822078	0.411032
ANAPC1P4	1036.22	0.159902	0.10216	1.5652	0.117535
ANAPC1P6	55.9466	-0.180855	0.307539	-0.588071	0.556484
ANAPC2	338.575	-0.91538	0.203023	-4.50876	6.52077e-06
ANAPC4	670.324	0.251268	0.112942	2.22476	0.0260975
ANAPC5	3611.05	0.0599467	0.0790414	0.758422	0.448198
ANAPC7	2612.44	0.0797554	0.0857088	0.930539	0.352092
ANGEL1	482.379	0.0358566	0.120573	0.297386	0.766172
ANGEL2	542.539	0.144619	0.11783	1.22735	0.219692
ANGPT1	1165.38	0.225454	0.114051	1.97679	0.0480651
ANGPTL4	18.7737	-0.524355	0.554805	-0.945116	0.3446
ANGPTL6	23.3674	-0.791226	0.435538	-1.81667	0.0692683
ANK1	2930.07	-0.20678	0.10497	-1.9699	0.0488504
ANK2	42.9854	0.302673	0.323271	0.936281	0.349129
ANK3	104.723	0.327179	0.211491	1.54701	0.121861
ANKAR	46.2821	0.205691	0.313245	0.656643	0.51141
ANKDD1A	25.7192	-0.0445877	0.425499	-0.104789	0.916543
ANKEF1	242.595	0.0230582	0.160412	0.143744	0.885703
ANKFY1	904.566	0.0640673	0.099034	0.646923	0.517682
ANKH	829.884	0.0260101	0.100851	0.257906	0.796479
ANKHD1	211.707	0.242128	0.168861	1.43389	0.151604
ANKHD1-EIF4EBP3	18.977	-0.566039	0.475871	-1.18948	0.234251
ANKIB1	826.612	0.126611	0.109758	1.15354	0.248688
ANKLE1	123.347	-0.192877	0.212596	-0.907248	0.364275
ANKLE2	1347.18	-0.00555056	0.0959604	-0.0578422	0.953874
ANKMY1	239.901	-0.114676	0.158131	-0.7252	0.468329
ANKMY2	727.474	0.262068	0.116442	2.25062	0.0244094
ANKRA2	220.777	0.0181205	0.15694	0.115461	0.908079
ANKRD10	1429.22	0.102212	0.0925046	1.10494	0.269184
ANKRD11	3396.58	-0.373621	0.0954462	-3.91447	9.06043e-05
ANKRD12	836.864	0.261405	0.120416	2.17085	0.0299428
ANKRD13A	1377.74	0.0897406	0.0956767	0.937956	0.348267
ANKRD13B	262.828	-0.578283	0.17838	-3.24187	0.00118749
ANKRD13C	543.642	0.0905474	0.124001	0.730214	0.46526
ANKRD13D	195.534	-0.822238	0.230711	-3.56393	0.00036534
ANKRD16	79.339	-0.152352	0.241808	-0.630051	0.528661
ANKRD17	4079.98	0.141085	0.0849229	1.66133	0.0966462
ANKRD18A	22.453	0.46981	0.45593	1.03044	0.302802
ANKRD18B	139.168	0.254408	0.196901	1.29206	0.196335
ANKRD18CP	164.224	0.16246	0.178543	0.909921	0.362864
ANKRD18DP	35.687	0.397122	0.348937	1.13809	0.255083
ANKRD18DP_1	32.7237	0.35733	0.36165	0.988054	0.323126
ANKRD19P	214.53	-0.122399	0.15879	-0.770826	0.44081
ANKRD20A1	274.068	0.169562	0.158557	1.06941	0.284887
ANKRD20A12P	238.771	0.29741	0.16978	1.75174	0.0798187
ANKRD20A12P_1	203.156	0.331205	0.179193	1.84831	0.064557
ANKRD20A21P	47.1334	-0.230461	0.304662	-0.756448	0.449381
ANKRD20A2P	327.737	0.131214	0.150074	0.874327	0.38194
ANKRD20A3P	296.474	0.169264	0.14947	1.13243	0.257452
ANKRD20A4-ANKRD20A20P	282.188	0.209536	0.153082	1.36878	0.171067
ANKRD20A5P	56.5896	0.352549	0.287887	1.22461	0.220723
ANKRD20A8P	77.1312	0.312102	0.279763	1.11559	0.264597
ANKRD20A9P	61.6697	0.268957	0.278273	0.966524	0.333782
ANKRD20A9P_1	61.5031	0.261882	0.278411	0.94063	0.346895
ANKRD23	51.9317	-0.335373	0.291631	-1.14999	0.250148
ANKRD26	400.11	0.168982	0.132451	1.27582	0.202021
ANKRD27	1640.94	0.0293252	0.089653	0.327097	0.743595
ANKRD28	1418.94	0.199608	0.0996329	2.00343	0.0451311
ANKRD33B	563.565	-0.04675	0.113057	-0.41351	0.679233
ANKRD34A	31.0163	-0.294776	0.384843	-0.765963	0.443698
ANKRD36	553.318	0.122309	0.129729	0.94281	0.345778
ANKRD36_1	552.319	0.122625	0.129444	0.94732	0.343476
ANKRD36B	481.339	0.103617	0.142799	0.725616	0.468074
ANKRD36B_1	481.389	0.103011	0.141032	0.730413	0.465138
ANKRD36C	218.856	0.110653	0.169355	0.653376	0.513514
ANKRD39	102.396	-0.696554	0.245177	-2.84103	0.00449684
ANKRD40	977.417	0.127969	0.10337	1.23797	0.215729
ANKRD42	256.554	-0.096564	0.146406	-0.659565	0.509533
ANKRD42-DT	75.6217	0.146602	0.249028	0.588698	0.556064
ANKRD44	460.794	0.120966	0.122954	0.983833	0.325198
ANKRD45	11.1801	0.219777	0.600808	0.365802	0.714513
ANKRD46	370.941	0.168463	0.134164	1.25565	0.209242
ANKRD49	455.817	0.124274	0.129864	0.95696	0.338588
ANKRD50	545.242	0.152572	0.124128	1.22915	0.219017
ANKRD52	1685.28	-0.0501915	0.0996019	-0.503921	0.614317
ANKRD54	255.601	-0.203545	0.163515	-1.24481	0.213203
ANKRD55	46.5026	0.00997727	0.333742	0.0298952	0.976151
ANKRD6	240.578	-0.0357503	0.15049	-0.237559	0.812223
ANKRD61	24.551	0.0490097	0.413899	0.11841	0.905743
ANKRD62	112.743	0.199217	0.213235	0.93426	0.35017
ANKRD62P1-PARP4P3	18.3958	-0.00971817	0.515571	-0.0188493	0.984961
ANKRD63	43.8694	-0.203389	0.32475	-0.626296	0.531121
ANKRD9	83.9172	-0.335031	0.251766	-1.33072	0.183281
ANKS1A	733.328	-0.217908	0.1102	-1.97739	0.0479978
ANKS3	131.321	-0.615897	0.204536	-3.01119	0.00260225
ANKS6	1263.65	-0.0978056	0.101615	-0.962513	0.335792
ANKZF1	843.632	-0.201183	0.10423	-1.93019	0.0535838
ANLN	1675.41	0.215954	0.091661	2.35601	0.0184725
ANO10	585.045	0.120995	0.11404	1.06098	0.288698
ANO3	19.3293	0.25065	0.470598	0.532619	0.594297
ANO5	147.44	0.304777	0.203031	1.50113	0.133322
ANO6	1402.33	0.131577	0.0997595	1.31895	0.187187
ANO7	50.0042	-0.207462	0.341801	-0.606968	0.543872
ANO7L1	13.9082	-0.269963	0.573342	-0.470858	0.637742
ANO7L1_1	13.5045	-0.249293	0.571154	-0.436473	0.662493
ANO8	96.4252	-0.870784	0.271262	-3.21011	0.00132682
ANO9	132.957	-0.772864	0.228844	-3.37726	0.000732126
ANP32A	4281.37	0.100104	0.0807403	1.23983	0.215039
ANP32AP1	38.9357	-0.192337	0.332615	-0.578255	0.563092
ANP32B	9972.06	0.147154	0.0855332	1.72043	0.0853543
ANP32E	3104.9	0.227183	0.0928092	2.44785	0.0143711
ANPEP	80.2027	-0.321693	0.23709	-1.35684	0.174832
ANTKMT	57.8144	-2.25719	0.831554	-2.71442	0.00663917
ANTXR1	369.577	0.325028	0.128704	2.52539	0.011557
ANTXR2	977.204	0.155831	0.104931	1.48507	0.137525
ANXA1	6072.29	0.0574224	0.0930355	0.617209	0.537097
ANXA11	2483.53	-0.14447	0.0888079	-1.62677	0.103786
ANXA2	5057.82	0.0725197	0.0832056	0.871572	0.383442
ANXA2P2	578.605	0.0811584	0.11349	0.715112	0.47454
ANXA2R	86.7228	-0.0757553	0.230145	-0.329164	0.742032
ANXA2R-AS1	86.3534	-0.0864879	0.236023	-0.366439	0.714037
ANXA2R-OT1	26.1309	0.0526511	0.410937	0.128124	0.898051
ANXA3	327.234	0.145778	0.158525	0.919585	0.35779
ANXA4	470.155	0.0326171	0.117127	0.278476	0.780647
ANXA5	1587.56	0.101343	0.0932289	1.08703	0.277022
ANXA6	1252.37	-0.0424657	0.0953406	-0.44541	0.656023
ANXA7	1977.78	0.102641	0.0882419	1.16317	0.244759
ANXA8_1	113.851	0.122574	0.210768	0.58156	0.560863
ANXA9	67.1673	0.0595075	0.258171	0.230497	0.817706
AOC2	48.1359	-0.10874	0.313008	-0.347404	0.728288
AOC3	34.8176	-0.0655705	0.363396	-0.180438	0.856808
AOPEP	142.677	0.158497	0.191066	0.829539	0.406799
AOX1	36.1305	-0.0307164	0.374774	-0.0819598	0.934679
AP1AR	250.504	0.275295	0.157456	1.74839	0.0803957
AP1B1	1772.74	-0.436715	0.132909	-3.28583	0.00101684
AP1G1	2345.04	0.186665	0.092623	2.01532	0.0438709
AP1G2	335.135	-0.343542	0.147692	-2.32608	0.0200144
AP1G2-AS1	41.9216	-0.373446	0.326403	-1.14413	0.252571
AP1M1	739.904	-0.411543	0.151093	-2.72376	0.00645426
AP1S1	786.754	-0.121404	0.106126	-1.14396	0.252641
AP1S2	888.671	0.214789	0.115177	1.86485	0.0622021
AP1S3	89.4178	0.190575	0.233185	0.817267	0.413776
AP2A1	1528.04	-0.655698	0.147729	-4.43851	9.05833e-06
AP2A2	565.989	-0.355004	0.137863	-2.57504	0.0100228
AP2A2_1	532.494	-0.35101	0.140639	-2.49583	0.0125662
AP2A2_2	520.334	-0.349003	0.137223	-2.54333	0.0109803
AP2B1	8292.1	0.135839	0.0813423	1.66996	0.094927
AP2M1	3693.1	-0.0787985	0.0877464	-0.898025	0.369172
AP2S1	1154.11	-0.371277	0.111783	-3.32141	0.00089565
AP3B1	2038.75	0.193779	0.0981598	1.97411	0.0483687
AP3B2	40.348	-0.0444862	0.339877	-0.130889	0.895863
AP3D1	2314.01	-0.444982	0.119696	-3.71759	0.000201134
AP3M1	2750.42	0.183386	0.097112	1.8884	0.0589722
AP3M2	677.848	0.150892	0.111429	1.35416	0.175685
AP3S1	810.701	0.295051	0.128546	2.29529	0.0217166
AP3S2	35.75	0.151458	0.345994	0.437747	0.66157
AP4B1	313.343	0.0465834	0.140772	0.330913	0.74071
AP4B1-AS1	16.2308	0.376579	0.510008	0.738379	0.460284
AP4E1	630.99	0.171393	0.116536	1.47073	0.141365
AP4M1	194.377	-0.518622	0.171515	-3.02377	0.00249649
AP4S1	134.28	0.140506	0.193631	0.725641	0.468059
AP5B1	818.103	-0.355033	0.124787	-2.8451	0.00443973
AP5M1	806.672	0.154504	0.115343	1.33952	0.180401
AP5S1	122.698	-0.236296	0.205002	-1.15265	0.249053
AP5Z1	293.223	-1.09673	0.41509	-2.64214	0.00823837
APAF1	587.175	0.144859	0.115926	1.24959	0.21145
APBA2	522.539	-0.352751	0.153618	-2.29628	0.0216598
APBA2_1	523.753	-0.372505	0.151864	-2.45288	0.0141718
APBA2_2	491.874	-0.392536	0.152711	-2.57046	0.0101564
APBA3	121.552	-1.1617	0.314863	-3.68954	0.000224659
APBB1	159.185	-0.3731	0.193303	-1.93013	0.0535913
APBB2	172.89	0.109507	0.173685	0.630491	0.528374
APBB3	164.745	-0.35357	0.193858	-1.82386	0.0681732
APC	2314.48	0.192404	0.0947957	2.02967	0.0423902
APC2	163.048	-1.33709	0.290145	-4.60834	4.05891e-06
APEH	1388.66	-0.0641283	0.106806	-0.600418	0.548227
APEX1	2376.56	0.0131293	0.085542	0.153484	0.878017
APEX1_1	2328.61	0.0153359	0.0860537	0.178213	0.858555
APEX2	656.821	-0.106799	0.123696	-0.863397	0.387919
APH1A	1463.85	-0.019299	0.0937405	-0.205877	0.836887
APH1B	114.598	0.118055	0.217748	0.542164	0.587706
API5	4088.22	0.227452	0.0891517	2.5513	0.0107323
APIP	822.353	0.105058	0.104688	1.00354	0.315602
APLF	63.4986	0.472219	0.289949	1.62863	0.103392
APLNR	48.2662	-0.0319568	0.303883	-0.105162	0.916248
APLP1	34.4566	-0.533958	0.384719	-1.38792	0.165163
APLP2	6968.01	-0.0227585	0.0749411	-0.303685	0.761368
APMAP	671.579	-0.0181396	0.107254	-0.169128	0.865696
APOBEC3A	48.0126	-0.237529	0.32243	-0.736684	0.461315
APOBEC3A_B	129.327	-0.0531713	0.217589	-0.244366	0.806947
APOBEC3B	518.447	0.110149	0.117304	0.939003	0.347729
APOBEC3C	2252.64	0.152565	0.0880119	1.73346	0.0830136
APOBEC3D	171.41	0.0687486	0.18356	0.374528	0.708011
APOBEC3F	74.8179	-0.211076	0.26394	-0.799711	0.423878
APOBEC3G	78.1396	0.156806	0.255349	0.614086	0.539159
APOBR	642.828	-0.699027	0.165634	-4.2203	2.43974e-05
APOC1	891.263	-0.143379	0.109826	-1.3055	0.191722
APOC1P1	29.5069	-0.258307	0.395313	-0.653425	0.513483
APOD	15.5045	-0.285317	0.514963	-0.554053	0.579542
APOE	534.391	-1.20636	0.375119	-3.21593	0.00130024
APOL1	386.433	0.171646	0.125834	1.36407	0.172547
APOL2	267.239	0.094209	0.149388	0.630631	0.528282
APOL4	442.865	0.192559	0.120755	1.59462	0.110796
APOL6	77.2324	0.0244513	0.27357	0.0893789	0.928781
APOLD1	55.9785	-0.116074	0.286656	-0.404923	0.685534
APOM	35.5994	-0.0973922	0.376124	-0.258936	0.795684
APOM_1	35.443	-0.0847741	0.379616	-0.223315	0.82329
APOM_2	35.5994	-0.0973922	0.376124	-0.258936	0.795684
APOM_3	35.5994	-0.0973922	0.376124	-0.258936	0.795684
APOM_4	35.5994	-0.0973922	0.376124	-0.258936	0.795684
APOM_5	35.5994	-0.0973922	0.376124	-0.258936	0.795684
APOM_6	35.7661	-0.0836116	0.375892	-0.222436	0.823975
APOO	360.148	0.202177	0.133221	1.5176	0.129116
APOOL	1532.95	0.190557	0.0968052	1.96846	0.049015
APPAT	11.8414	0.610568	0.591369	1.03247	0.301854
APPAT_1	12.3394	0.542903	0.578965	0.937712	0.348392
APPBP2	552.919	0.244197	0.112003	2.18027	0.0292375
APPL1	882.813	0.213644	0.108165	1.97517	0.0482485
APPL2	276.629	0.122623	0.152832	0.802337	0.422358
APRG1	15.4675	-0.200086	0.549497	-0.364125	0.715765
APRT	1387.68	-0.87451	0.296417	-2.95027	0.00317495
APTR	234.031	0.0291378	0.153359	0.189998	0.849311
APTX	529.194	0.116923	0.124298	0.940669	0.346874
AQP1	575.566	-0.158198	0.117552	-1.34577	0.178378
AQP10	240.172	-0.287072	0.176421	-1.6272	0.103694
AQP11	18.16	0.352308	0.506882	0.69505	0.487024
AQP2	10.0892	-0.942433	0.677939	-1.39015	0.164485
AQP3	825.359	-0.213039	0.141696	-1.50349	0.132714
AQP7	12.3855	0.929723	0.621133	1.49682	0.134441
AQP7P1	81.0662	-0.273839	0.237566	-1.15268	0.24904
AQP7P3	19.3003	0.0450273	0.4937	0.0912039	0.927331
AQR	1474.09	0.257948	0.0974072	2.64814	0.00809348
AR	13.4338	0.127219	0.563277	0.225855	0.821314
ARAF	675.919	-0.402914	0.141914	-2.83914	0.00452348
ARAP1	1037.73	-0.659553	0.142421	-4.631	3.63906e-06
ARAP2	33.8363	0.286285	0.368833	0.776193	0.437635
ARAP3	383.532	-0.292955	0.143107	-2.04711	0.0406472
ARCN1	3894.43	0.111586	0.093037	1.19937	0.230385
AREG	169.727	-0.0337258	0.18827	-0.179135	0.857832
AREL1	1312.99	0.138362	0.0975226	1.41877	0.155967
ARF1	6230.92	-0.305962	0.099836	-3.06465	0.00217926
ARF3	1000.04	-0.0416376	0.114623	-0.363258	0.716412
ARF4	1975.58	0.164206	0.0936933	1.75259	0.0796723
ARF4-AS1	11.982	0.314516	0.592898	0.530472	0.595785
ARF5	957.473	-0.392643	0.117935	-3.32931	0.000870609
ARF6	1055.88	0.0456002	0.102383	0.445387	0.65604
ARFGAP1	663.811	-0.748175	0.176594	-4.2367	2.26825e-05
ARFGAP2	1860.58	-0.136581	0.0919308	-1.48569	0.13736
ARFGAP3	212.659	0.0885207	0.170351	0.519636	0.603317
ARFGEF1	1668.31	0.154093	0.104828	1.46996	0.141572
ARFGEF2	833.961	0.111616	0.101842	1.09597	0.273091
ARFIP1	330.446	0.381975	0.14767	2.58668	0.00969048
ARFIP2	893.247	-0.0153898	0.106711	-0.14422	0.885327
ARFRP1	275.387	-0.743076	0.206053	-3.60624	0.000310666
ARG2	175.659	0.18603	0.171626	1.08393	0.278397
ARGLU1	1406.58	0.00714189	0.0926262	0.0771045	0.93854
ARHGAP1	698.657	-0.167086	0.128417	-1.30112	0.193218
ARHGAP10	200.945	-0.0179435	0.161482	-0.111118	0.911523
ARHGAP11A	490.448	0.278759	0.121558	2.29322	0.0218351
ARHGAP11A_1	480.077	0.282142	0.124127	2.273	0.0230262
ARHGAP11A_2	512.018	0.266994	0.119654	2.23139	0.0256555
ARHGAP11A_3	480.392	0.280003	0.124541	2.24829	0.0245579
ARHGAP11B	308.549	0.0276856	0.143834	0.192483	0.847364
ARHGAP11B_1	312.685	0.0439217	0.144144	0.304707	0.760589
ARHGAP11B_2	329.163	0.0273765	0.139047	0.196886	0.843917
ARHGAP11B_3	312.031	0.0443748	0.144188	0.307757	0.758267
ARHGAP11B-DT	16.6124	0.200709	0.557887	0.359767	0.719021
ARHGAP11B-DT_1	17.9127	0.236748	0.524121	0.451704	0.651482
ARHGAP11B-DT_2	14.8368	0.153569	0.575998	0.266613	0.789767
ARHGAP11B-DT_3	17.9127	0.236748	0.524121	0.451704	0.651482
ARHGAP12	423.346	0.138979	0.122807	1.13168	0.257767
ARHGAP15	290.808	0.262788	0.158169	1.66144	0.0966249
ARHGAP17	740.216	-0.0396322	0.111735	-0.354698	0.722816
ARHGAP17_1	725.01	-0.0263054	0.111783	-0.235326	0.813956
ARHGAP18	1498.69	0.217569	0.10298	2.11273	0.0346238
ARHGAP19	775.239	0.167623	0.110796	1.5129	0.130305
ARHGAP20	26.3789	0.0435099	0.422825	0.102903	0.91804
ARHGAP21	1727.07	0.0975621	0.0943821	1.03369	0.30128
ARHGAP22	212.242	-0.434762	0.171266	-2.53851	0.0111325
ARHGAP23	21.3929	-0.58448	0.469973	-1.24365	0.213629
ARHGAP23_1	19.752	-0.624666	0.480461	-1.30014	0.193554
ARHGAP24	14.6171	0.262094	0.539648	0.485676	0.627197
ARHGAP25	577.47	0.0481097	0.120264	0.400034	0.689132
ARHGAP26	82.6076	0.32223	0.248718	1.29556	0.195127
ARHGAP27	94.9013	-0.268827	0.248418	-1.08216	0.279182
ARHGAP27_1	85.6521	-0.327284	0.253392	-1.29161	0.196492
ARHGAP27_2	92.621	-0.262692	0.249487	-1.05293	0.292375
ARHGAP27P1	59.023	-0.904911	0.297437	-3.04237	0.00234727
ARHGAP27P1-BPTFP1-KPNA2P3	283.168	0.114719	0.148462	0.772715	0.439691
ARHGAP28	191.928	0.240934	0.169493	1.4215	0.155171
ARHGAP30	29.7579	-0.588855	0.405892	-1.45077	0.146845
ARHGAP31	107.976	-0.12916	0.209602	-0.616216	0.537752
ARHGAP32	10.825	-0.785186	0.63757	-1.23153	0.218125
ARHGAP33	88.7595	-1.20268	0.321726	-3.73822	0.000185331
ARHGAP35	1456.6	-0.0995199	0.094583	-1.0522	0.29271
ARHGAP39	100.772	-0.755291	0.256107	-2.94912	0.00318679
ARHGAP4	334.998	-0.921022	0.207085	-4.44755	8.68539e-06
ARHGAP42	123.262	0.161364	0.206799	0.780295	0.435217
ARHGAP45	236.946	-1.17981	0.243065	-4.85387	1.21077e-06
ARHGAP5	1606.05	0.221658	0.101808	2.17721	0.0294647
ARHGAP5-AS1	50.4861	-0.043421	0.293526	-0.147929	0.882399
ARHGAP6	1493.1	0.0690392	0.0948578	0.727819	0.466725
ARHGAP9	142.798	-0.406822	0.194595	-2.09061	0.0365629
ARHGDIA	2130.57	-0.922366	0.377118	-2.44583	0.014452
ARHGDIB	2118.38	0.101019	0.0884778	1.14174	0.25356
ARHGDIG	19.2327	-0.931749	0.494547	-1.88404	0.0595589
ARHGEF1	1022.94	-0.896799	0.300588	-2.98348	0.00284991
ARHGEF10	520.564	-0.126105	0.118568	-1.06356	0.287526
ARHGEF10_1	514.457	-0.131743	0.118903	-1.10799	0.267865
ARHGEF11	659.906	-0.0705144	0.117129	-0.602025	0.547158
ARHGEF12	3439.46	0.136904	0.0915296	1.49573	0.134723
ARHGEF16	81.5568	-1.01506	0.320425	-3.16786	0.00153563
ARHGEF17	23.3136	-0.593524	0.435125	-1.36403	0.172558
ARHGEF18	442.6	-0.499531	0.161932	-3.08482	0.00203673
ARHGEF19	89.536	-0.692836	0.251628	-2.75341	0.00589777
ARHGEF19_1	90.5279	-0.69737	0.252363	-2.76336	0.00572094
ARHGEF2	2815.28	-0.274528	0.0980063	-2.80113	0.00509246
ARHGEF25	256.022	-0.0956422	0.157313	-0.607973	0.543205
ARHGEF2-AS2	103.569	-0.271474	0.223082	-1.21692	0.223633
ARHGEF3	116.854	0.109403	0.202606	0.539977	0.589213
ARHGEF39	267.711	-0.111301	0.143217	-0.777153	0.437069
ARHGEF40	102.764	-0.509677	0.215916	-2.36053	0.0182487
ARHGEF6	1417.81	0.152815	0.103098	1.48223	0.13828
ARHGEF7	967.16	-0.0256796	0.0980901	-0.261796	0.793479
ARHGEF9	118.591	0.00576119	0.207762	0.0277298	0.977878
ARID1A	3042.8	-0.141395	0.0923658	-1.53082	0.125814
ARID1B	1089.64	-0.117278	0.100506	-1.16688	0.243261
ARID2	1251.97	0.211051	0.101757	2.07407	0.0380728
ARID3A	2433.87	-0.415592	0.114964	-3.61498	0.000300372
ARID3B	1136.23	-0.387541	0.134653	-2.87806	0.00400131
ARID4A	502.511	0.223306	0.132001	1.6917	0.0907038
ARID4B	1176.92	0.192373	0.103566	1.85749	0.0632417
ARID5A	173.315	-0.884655	0.2558	-3.45838	0.000543435
ARID5B	236.252	0.189868	0.157667	1.20423	0.2285
ARIH1	1518.13	0.159177	0.0968989	1.64272	0.100442
ARIH2	2202.96	0.120646	0.0892393	1.35194	0.176396
ARIH2OS	14.8561	-0.562516	0.532175	-1.05701	0.290505
ARK2N	683.623	0.081676	0.108183	0.754978	0.450262
ARL1	1031.13	0.157495	0.0972004	1.62031	0.105166
ARL11	64.3049	0.0337309	0.261717	0.128883	0.89745
ARL13B	198.277	0.249206	0.178805	1.39373	0.1634
ARL14EP	432.477	0.143398	0.130492	1.0989	0.271811
ARL15	1272.9	0.22951	0.114269	2.00851	0.0445892
ARL16	240.056	-0.256344	0.156312	-1.63995	0.101016
ARL17A	575.466	-0.0115378	0.113289	-0.101844	0.918881
ARL17A_1	698.828	0.0222616	0.10916	0.203936	0.838404
ARL17B	450.213	0.0107999	0.127475	0.0847215	0.932483
ARL2	183.541	-0.985372	0.238892	-4.12475	3.71137e-05
ARL2BP	557.906	0.189279	0.112695	1.67956	0.0930425
ARL3	189.231	0.214693	0.163836	1.31041	0.190057
ARL4A	1862.31	0.13456	0.10651	1.26335	0.206464
ARL4D	37.4404	-0.377489	0.348574	-1.08295	0.27883
ARL5A	1825.22	0.243367	0.108951	2.23372	0.0255015
ARL5B	1340.06	0.302675	0.118092	2.56305	0.0103756
ARL6	65.0292	0.242265	0.282891	0.856392	0.391781
ARL6IP1	3845.95	0.203483	0.0883199	2.30393	0.0212266
ARL6IP4	1050.64	-0.560566	0.149567	-3.74793	0.000178299
ARL6IP5	649.333	0.258922	0.117142	2.21033	0.0270823
ARL6IP6	380.525	0.0609449	0.131652	0.462925	0.643418
ARL8A	350.452	-0.306905	0.153128	-2.00424	0.0450447
ARL8B	2677.17	0.245755	0.0960211	2.55939	0.0104857
ARL9	120.899	0.196697	0.214899	0.9153	0.360034
ARLNC1	20.117	0.110572	0.476889	0.231862	0.816646
ARMC1	1335.81	0.277781	0.112452	2.47022	0.0135029
ARMC10	1098.52	0.21359	0.0955808	2.23465	0.0254405
ARMC10_1	812.463	0.259653	0.105575	2.4594	0.0139169
ARMC2	19.9312	-0.0942125	0.512143	-0.183957	0.854047
ARMC5	133.081	-0.790761	0.2488	-3.1783	0.0014814
ARMC6	651.235	-0.649915	0.1861	-3.49229	0.000478902
ARMC7	224.258	-0.438204	0.173521	-2.52537	0.0115576
ARMC8	685.217	0.233995	0.119009	1.96619	0.0492763
ARMC9	89.4635	0.0917394	0.234505	0.391205	0.695646
ARMCX1	25.0199	-0.104302	0.416342	-0.250519	0.802186
ARMCX3	1221.54	0.0783563	0.099118	0.790535	0.429215
ARMCX4	14.0512	0.127442	0.578438	0.22032	0.825622
ARMCX5	570.673	0.181439	0.116366	1.55921	0.118946
ARMCX5-GPRASP2	39.9574	-0.0815309	0.331113	-0.246232	0.805502
ARMCX6	398.357	0.000748204	0.126776	0.00590176	0.995291
ARMT1	552.295	0.161591	0.118577	1.36275	0.172962
ARNT	1083.04	0.150134	0.102874	1.4594	0.144455
ARPC1A	1314.41	-0.115867	0.0933447	-1.24128	0.214503
ARPC1B	2369.33	-0.758728	0.159912	-4.74466	2.08862e-06
ARPC2	3172.22	0.0854049	0.0822952	1.03779	0.299369
ARPC3	3747.04	0.121013	0.0889266	1.36082	0.173572
ARPC4	1188.54	-0.096141	0.0960167	-1.0013	0.316684
ARPC4-TTLL3	12.6948	-0.462393	0.62006	-0.745723	0.455834
ARPC5	2315.29	-0.00884347	0.0857547	-0.103125	0.917864
ARPC5L	1357.5	-0.00387786	0.0917134	-0.0422824	0.966274
ARPP19	3435.01	0.280753	0.0922676	3.04282	0.00234374
ARRB1	1577.23	0.00184718	0.100301	0.0184164	0.985307
ARRB2	338.322	-0.159896	0.146848	-1.08886	0.276218
ARRDC1	154.426	-0.781048	0.230951	-3.38187	0.000719939
ARRDC1-AS1	305.565	-0.459081	0.170307	-2.69561	0.007026
ARRDC2	466.113	-0.298053	0.143767	-2.07317	0.0381562
ARRDC3	477.653	0.177594	0.129772	1.36851	0.171154
ARRDC3-AS1	17.4045	-0.0605257	0.497768	-0.121594	0.90322
ARRDC4	760.015	0.121767	0.126813	0.96021	0.336949
ARSA	164.198	-0.994461	0.266314	-3.73417	0.000188336
ARSB	147.269	0.217322	0.186611	1.16457	0.244193
ARSG	22.7499	0.172604	0.430031	0.401375	0.688144
ARSK	102.977	0.465473	0.219244	2.12308	0.0337469
ART4	69.5259	0.126968	0.256706	0.494606	0.620879
ARV1	1107.38	0.104462	0.10124	1.03183	0.302154
ARVCF	560.434	-1.09188	0.437606	-2.49511	0.0125917
ASAH1	1500.13	0.0858588	0.0908837	0.944711	0.344807
ASAH1-AS1	13.8184	0.42477	0.547688	0.775569	0.438004
ASAH2	262.583	0.305676	0.148841	2.05371	0.0400037
ASAH2B	409.705	0.299679	0.127403	2.3522	0.0186626
ASAP1	2585.79	0.116936	0.08758	1.33519	0.181815
ASAP2	43.0308	0.133597	0.319895	0.417627	0.67622
ASAP3	232.372	0.00790466	0.164041	0.048187	0.961567
ASAP3_1	227.82	0.00612531	0.165205	0.037077	0.970424
ASB1	733.676	-0.0822083	0.10422	-0.788795	0.430232
ASB13	371.124	-0.13362	0.12962	-1.03086	0.302608
ASB14	18.6682	0.612933	0.49671	1.23399	0.217208
ASB16	53.8022	-0.236207	0.294324	-0.802542	0.42224
ASB16-AS1	236.913	-0.12591	0.150753	-0.835211	0.403599
ASB3	24.9882	-0.0121027	0.437117	-0.0276875	0.977911
ASB6	385.812	-0.328702	0.162562	-2.02201	0.0431758
ASB7	369.776	0.0660275	0.131946	0.500414	0.616784
ASB8	540.338	0.110865	0.119021	0.931472	0.35161
ASCC1	446.992	0.132367	0.121186	1.09226	0.274718
ASCC2	1008.27	-0.25691	0.114542	-2.24293	0.0249012
ASCC3	1947.05	0.233136	0.100793	2.31303	0.020721
ASF1A	689.595	0.2657	0.110379	2.40717	0.0160765
ASF1B	989.076	-0.0527624	0.103195	-0.511288	0.609149
ASF1B_1	971.11	-0.055766	0.102985	-0.541497	0.588165
ASH1L	1208.06	0.0919753	0.0956626	0.961455	0.336323
ASH1L-AS1	102.681	-0.316342	0.220419	-1.43519	0.151234
ASH2L	3648.86	0.0858236	0.0819851	1.04682	0.295183
ASIC1	390.602	-0.0272545	0.128421	-0.212228	0.831929
ASIC3	74.8128	-0.378283	0.28703	-1.31792	0.18753
ASIC4	740.875	-0.658246	0.160976	-4.0891	4.33058e-05
ASL	269.425	-0.60003	0.164108	-3.65632	0.00025586
ASMER1	28.7661	-0.0589564	0.379908	-0.155186	0.876675
ASMTL	244.766	-0.447773	0.189879	-2.3582	0.018364
ASMTL_1	246.049	-0.45251	0.190597	-2.37417	0.0175883
ASMTL-AS1	120.545	-0.539237	0.221935	-2.42971	0.015111
ASMTL-AS1_1	122.474	-0.53123	0.222876	-2.38353	0.0171476
ASNS	33.0055	-1.2409	0.394892	-3.14238	0.00167578
ASNSD1	791.493	0.16142	0.108717	1.48477	0.137605
ASNSP1	55.5176	-0.0617117	0.323418	-0.190811	0.848674
ASPH	466.623	0.209869	0.133456	1.57257	0.115819
ASPHD2	18.5165	-0.26833	0.483729	-0.554712	0.579092
ASPM	3016.18	0.262697	0.0938997	2.79764	0.0051478
ASPRV1	13.1385	0.110536	0.580648	0.190366	0.849022
ASPSCR1	118.415	-0.722456	0.267936	-2.69638	0.00700981
ASRGL1	490.222	-0.0976254	0.12181	-0.801456	0.422867
ASS1	128.036	-0.113546	0.206695	-0.549341	0.582772
ASTE1	100.198	0.10936	0.222394	0.49174	0.622903
ASTN1	10.8723	-0.721987	0.620263	-1.164	0.244424
ASTN2	46.4853	-0.251029	0.32523	-0.771849	0.440204
ASXL1	2297.08	-0.00976781	0.0828483	-0.1179	0.906147
ASXL2	1616.15	0.127814	0.0959265	1.33242	0.182722
ASXL3	350.651	0.13347	0.146055	0.913837	0.360803
ATAD1	913.662	0.245225	0.115354	2.12584	0.0335163
ATAD1_1	246.017	0.279618	0.166013	1.68432	0.0921207
ATAD2	3965.48	0.188436	0.0942061	2.00025	0.0454731
ATAD2B	799.583	0.19176	0.114119	1.68036	0.0928872
ATAD3A	1729.47	-1.12407	0.358615	-3.13449	0.00172153
ATAD3B	1482.1	-1.01357	0.323477	-3.13337	0.00172809
ATAD3C	81.6176	-1.26244	0.320995	-3.93289	8.393e-05
ATAD5	1425.53	0.201347	0.106384	1.89265	0.0584044
ATAT1	86.992	-0.164829	0.228145	-0.722477	0.470001
ATAT1_1	84.4679	-0.169817	0.229922	-0.738584	0.46016
ATAT1_2	85.6448	-0.186401	0.228879	-0.814407	0.415412
ATAT1_3	86.9817	-0.165083	0.22836	-0.722904	0.469739
ATAT1_4	86.8254	-0.17062	0.228588	-0.746406	0.455422
ATAT1_5	85.8011	-0.180757	0.228729	-0.790266	0.429373
ATAT1_6	85.7897	-0.169426	0.228704	-0.74081	0.458808
ATE1	304.872	0.237553	0.141817	1.67507	0.0939212
ATF1	516.215	0.162844	0.115045	1.41548	0.156927
ATF2	755.926	0.197281	0.105094	1.87719	0.060492
ATF3	266.343	-0.0285451	0.167008	-0.170921	0.864286
ATF4	4832.85	-0.0302705	0.102494	-0.295341	0.767734
ATF5	265.166	-0.245775	0.159066	-1.54512	0.122317
ATF6	2327.41	0.147852	0.0944551	1.56531	0.117509
ATF6B	1707.81	-0.348826	0.118773	-2.93693	0.00331484
ATF6B_1	1697.67	-0.350278	0.118607	-2.95328	0.0031442
ATF6B_2	1625.8	-0.360171	0.122237	-2.9465	0.00321394
ATF6B_3	1606.33	-0.361955	0.118777	-3.04735	0.00230871
ATF6-DT	12.389	-0.289917	0.590825	-0.490698	0.62364
ATF7	468.536	0.104607	0.121011	0.864438	0.387347
ATF7IP	1296.26	0.175399	0.105922	1.65592	0.097738
ATF7IP2	612.207	0.0616183	0.1115	0.552631	0.580516
ATG10	273.283	0.167633	0.145744	1.15019	0.250064
ATG101	328.199	-0.12414	0.154153	-0.8053	0.420647
ATG12	1059.56	0.196169	0.105424	1.86076	0.0627785
ATG13	1413.85	0.00747177	0.0921521	0.0810808	0.935378
ATG14	352.755	0.0687717	0.139979	0.491299	0.623215
ATG16L1	484.507	0.0579322	0.119087	0.48647	0.626634
ATG16L1_1	495.337	0.0521879	0.117574	0.443871	0.657136
ATG16L2	38.7557	-0.347181	0.333811	-1.04005	0.298316
ATG2A	795.264	-0.87384	0.170307	-5.13097	2.88255e-07
ATG2B	625.676	0.156509	0.113993	1.37296	0.169765
ATG3	830.467	0.135777	0.105094	1.29196	0.196371
ATG4A	680.109	0.170544	0.117412	1.45253	0.146355
ATG4B	764.445	-0.430696	0.147547	-2.91905	0.00351104
ATG4C	380.228	0.336473	0.135563	2.48205	0.0130628
ATG4D	221.791	-0.854452	0.214225	-3.98857	6.64714e-05
ATG5	1447.14	0.13693	0.0935471	1.46376	0.14326
ATG7	350.916	0.03751	0.129964	0.288618	0.772874
ATG9A	1501.1	-0.404416	0.11786	-3.43132	0.000600662
ATG9B	115.918	-0.0643511	0.209774	-0.306764	0.759023
ATIC	3337.93	0.129155	0.0829092	1.55779	0.119283
ATL1	10.9076	0.929414	0.638647	1.45529	0.14559
ATL2	1841.13	0.15029	0.0940681	1.59768	0.110115
ATL3	1075.64	0.184923	0.104979	1.76152	0.0781505
ATM	1369.89	0.143233	0.10792	1.32722	0.184437
ATMIN	997.366	0.210357	0.112357	1.87222	0.0611756
ATMIN_1	980.161	0.21531	0.114484	1.8807	0.0600125
ATN1	1246.54	-0.521623	0.153012	-3.40904	0.000651916
ATOSA	378.07	0.215742	0.142658	1.5123	0.130458
ATOSB	274.446	-0.411332	0.166103	-2.47637	0.0132725
ATOX1	370.823	-0.193856	0.14684	-1.32018	0.186773
ATP11A	948.95	-0.128537	0.109171	-1.17739	0.239041
ATP11B	2802.49	0.188818	0.0961408	1.96397	0.049533
ATP11C	1303.93	0.2623	0.105873	2.4775	0.0132305
ATP13A1	935.884	-0.704182	0.165588	-4.25261	2.11297e-05
ATP13A2	659.222	-0.920814	0.34729	-2.65143	0.00801519
ATP13A2_1	657.666	-0.921535	0.34708	-2.65511	0.00792833
ATP13A3	3138.72	0.166199	0.103185	1.61069	0.107247
ATP1A1	9735.03	0.0756517	0.0745545	1.01472	0.310241
ATP1A1-AS1	47.6164	0.168757	0.319906	0.527521	0.597832
ATP1B1	63.5856	0.0541323	0.264237	0.204863	0.837679
ATP1B2	182.56	-0.0936546	0.178305	-0.525249	0.59941
ATP1B3	2429.07	0.122047	0.088255	1.38289	0.1667
ATP1B4	181.304	0.0191074	0.16934	0.112834	0.910162
ATP23	216.395	0.249366	0.160596	1.55275	0.120482
ATP23_1	216.203	0.256032	0.160949	1.59077	0.111662
ATP2A1	40.224	-0.276905	0.327963	-0.844316	0.398493
ATP2A1-AS1	34.6929	-0.554913	0.357307	-1.55304	0.120412
ATP2A2	6766.83	0.115682	0.0767582	1.50709	0.131787
ATP2A3	984.239	-0.840761	0.169071	-4.97283	6.59818e-07
ATP2B1	1753.27	0.163728	0.0976382	1.67688	0.0935651
ATP2B4	1183.9	0.0561924	0.0982261	0.572072	0.567273
ATP2C1	1124.95	0.191761	0.112902	1.69847	0.0894194
ATP5F1A	8628.25	0.0541855	0.0765156	0.708163	0.478844
ATP5F1B	18555.8	0.0051149	0.0742825	0.0688574	0.945103
ATP5F1C	3954.38	0.114271	0.0922696	1.23845	0.21555
ATP5F1D	339.299	-1.47001	0.631927	-2.32624	0.0200059
ATP5F1E	435.72	-0.562447	0.179065	-3.14102	0.00168363
ATP5IF1	2596.61	-0.168399	0.0998471	-1.68657	0.0916868
ATP5IF1_1	2545.47	-0.164759	0.099283	-1.65949	0.097017
ATP5MC1	1211.18	0.0669736	0.0957402	0.699534	0.484218
ATP5MC2	2286.44	0.0827832	0.100711	0.821991	0.411082
ATP5MC3	4708.95	-0.0893108	0.0811063	-1.10116	0.270828
ATP5ME	693.933	-0.18793	0.151744	-1.23847	0.215542
ATP5MF	1858.02	0.0854766	0.0903673	0.945879	0.34421
ATP5MG	3033.44	0.0677757	0.0835686	0.811019	0.417355
ATP5MJ	1038.38	0.105839	0.111826	0.946466	0.343911
ATP5MK	1442.92	0.238732	0.0959597	2.48783	0.0128524
ATP5PB	5780.26	0.159442	0.087078	1.83103	0.0670963
ATP5PD	2026.8	0.201331	0.0887066	2.26963	0.0232298
ATP5PF	1958.67	0.278497	0.0944874	2.94745	0.00320406
ATP5PO	3186.06	0.0582044	0.0893369	0.651515	0.514714
ATP6	79365.5	0.2577	0.0982029	2.62415	0.00868644
ATP6AP1	1579.43	-0.144126	0.0994846	-1.44872	0.147415
ATP6AP1-DT	19.9531	-0.501717	0.466092	-1.07643	0.281734
ATP6AP1L	56.1286	0.0906793	0.283543	0.319808	0.749114
ATP6AP2	1723.89	0.172655	0.0952354	1.81293	0.069842
ATP6V0A1	4463.94	0.0728022	0.0792318	0.918851	0.358174
ATP6V0A2	1085.36	0.125818	0.101792	1.23602	0.21645
ATP6V0B	2025.53	-0.255601	0.100635	-2.53987	0.0110893
ATP6V0C	1034.65	-0.499151	0.15677	-3.18397	0.0014527
ATP6V0D1	1000.27	-0.117263	0.122232	-0.95935	0.337382
ATP6V0D1-DT	26.244	0.331973	0.41761	0.794936	0.426651
ATP6V0E1	757.055	0.00760547	0.117058	0.064972	0.948196
ATP6V0E2	303.283	-0.562068	0.193586	-2.90344	0.00369082
ATP6V0E2-AS1	24.2466	-0.101994	0.427643	-0.238503	0.811491
ATP6V1A	2330.98	0.211776	0.0936748	2.26076	0.0237742
ATP6V1B2	1838.79	0.146194	0.0954722	1.53127	0.125702
ATP6V1C1	1628.52	0.156018	0.107281	1.45429	0.145866
ATP6V1C2	21.8658	0.266184	0.461969	0.576194	0.564484
ATP6V1D	709.627	0.165783	0.10819	1.53234	0.125439
ATP6V1E1	2437.65	0.1592	0.0859523	1.85219	0.0639981
ATP6V1E2	70.3615	0.224769	0.271459	0.828002	0.407669
ATP6V1F	1966.04	-0.201734	0.10246	-1.96889	0.0489654
ATP6V1FNB	43.0935	-0.289378	0.338414	-0.855103	0.392494
ATP6V1G1	1555.19	0.0820802	0.0929455	0.883101	0.377182
ATP6V1G2	12.0018	-0.29734	0.588913	-0.504897	0.613631
ATP6V1G2_2	12.0018	-0.29734	0.588913	-0.504897	0.613631
ATP6V1G2_3	12.0018	-0.29734	0.588913	-0.504897	0.613631
ATP6V1G2_4	12.0018	-0.29734	0.588913	-0.504897	0.613631
ATP6V1G2_5	12.0018	-0.29734	0.588913	-0.504897	0.613631
ATP6V1G2_6	12.0018	-0.29734	0.588913	-0.504897	0.613631
ATP6V1H	822.299	0.0438396	0.108663	0.403446	0.68662
ATP7A	1976.48	0.165427	0.0975316	1.69614	0.0898595
ATP7B	791.176	0.027726	0.105063	0.263899	0.791858
ATP8	18052.6	0.299534	0.106001	2.82577	0.00471672
ATP8B1	36.9249	-0.0790954	0.344542	-0.229567	0.818429
ATP8B1-AS1	26.1708	-0.25581	0.423181	-0.604494	0.545515
ATP8B2	1225.08	-0.0504853	0.0961427	-0.525108	0.599508
ATP8B3	58.9413	-0.0741994	0.289742	-0.256088	0.797883
ATP8B4	38.7712	0.00248317	0.338271	0.00734077	0.994143
ATP8B5P	15.6898	0.0630327	0.536687	0.117448	0.906505
ATP9A	21.7564	-0.277778	0.441925	-0.628564	0.529634
ATP9B	322.559	0.020651	0.139113	0.148447	0.88199
ATPAF1	535.483	0.190218	0.124541	1.52736	0.126671
ATPAF2	132.055	-0.309521	0.215825	-1.43413	0.151535
ATPSCKMT	325.641	0.128308	0.138844	0.924119	0.355425
ATR	797.881	0.11626	0.114363	1.01659	0.309349
ATRAID	566.02	0.0230912	0.11942	0.193361	0.846676
ATRIP	11.1997	-0.173301	0.622107	-0.278571	0.780574
ATRN	781.757	0.254578	0.103003	2.47156	0.0134523
ATRX	2374.55	0.259129	0.100297	2.58361	0.0097772
ATXN1	43.9071	0.220524	0.325426	0.677648	0.497995
ATXN10	1009.82	0.174009	0.108104	1.60964	0.107476
ATXN1L	973.367	0.0159503	0.101249	0.157536	0.874823
ATXN2	1052.15	-0.0259686	0.0979681	-0.265072	0.790954
ATXN2L	3716.53	-0.354708	0.109814	-3.23009	0.00123753
ATXN3	178.033	0.0315811	0.179444	0.175995	0.860298
ATXN7	354.34	0.0600851	0.133709	0.449372	0.653163
ATXN7L1	196.37	0.0756883	0.165271	0.457965	0.646978
ATXN7L2	117.629	-0.476052	0.214501	-2.21935	0.0264631
ATXN7L3	1099.41	-0.239634	0.112068	-2.1383	0.0324925
ATXN7L3-AS1	24.9622	-0.259743	0.428368	-0.606353	0.54428
ATXN7L3B	3915.53	0.0879501	0.0807	1.08984	0.275784
AUH	337.346	-0.00928352	0.136518	-0.0680021	0.945784
AUNIP	696.298	0.068357	0.112462	0.607825	0.543304
AUP1	2832.46	-0.0486527	0.10548	-0.461252	0.644618
AURKA	1327.15	0.0537377	0.098284	0.54676	0.584544
AURKAIP1	913.387	-0.767306	0.329126	-2.33134	0.0197354
AURKAP1	79.5185	0.0537086	0.245446	0.218821	0.82679
AURKB	785.95	-0.161338	0.110367	-1.46184	0.143784
AUTS2	14.6204	-0.335323	0.543845	-0.616578	0.537513
AVEN	242.647	0.0671774	0.153415	0.437879	0.661474
AVIL	58.1483	-0.295776	0.284336	-1.04023	0.298231
AVL9	1716.05	0.157987	0.0977861	1.61564	0.106172
AVPI1	76.2289	-0.705262	0.269991	-2.61217	0.00899696
AXIN1	737.826	-0.619143	0.16995	-3.64308	0.000269392
AXL	254.445	-0.187697	0.157164	-1.19428	0.232369
AZI2	481.12	0.106182	0.132184	0.803289	0.421808
AZIN1	2525.38	0.168331	0.0865242	1.94548	0.0517168
AZIN2	11.4302	-0.319543	0.631297	-0.50617	0.612738
B2M	5474.47	0.164097	0.0908595	1.80605	0.0709103
B2M_1	4774.04	0.174224	0.0908255	1.91823	0.0550816
B3GALNT2	304.923	0.119325	0.144014	0.828568	0.407349
B3GALNT2_1	299.285	0.136232	0.145528	0.936124	0.349209
B3GALT1	58.6214	-0.152989	0.273186	-0.560017	0.575468
B3GALT1-AS1	379.498	-0.151103	0.147848	-1.02202	0.306774
B3GALT6	213.106	-0.504127	0.180105	-2.79908	0.00512489
B3GALT9	359.564	0.143288	0.140118	1.02262	0.306486
B3GAT3	429.947	-0.879102	0.379055	-2.31919	0.0203845
B3GLCT	58.2974	0.261519	0.276842	0.944651	0.344837
B3GNT2	617.081	0.126179	0.123801	1.01921	0.308103
B3GNT4	23.4442	-0.378656	0.439202	-0.862146	0.388607
B3GNT5	861.721	0.25669	0.107527	2.38721	0.0169766
B3GNT9	31.8842	-0.388681	0.366499	-1.06052	0.288907
B3GNTL1	146.386	-0.261239	0.270883	-0.964395	0.334848
B3GNTL1_1	120.228	-0.35287	0.222054	-1.58912	0.112033
B4GALNT1	277.679	-0.147151	0.164272	-0.895778	0.370372
B4GALNT3	10.9886	-0.563908	0.620556	-0.908715	0.363501
B4GALNT4	168.537	-0.712299	0.238023	-2.99257	0.00276639
B4GALT1	909.274	0.129368	0.0990462	1.30614	0.191506
B4GALT2	483.212	-0.437968	0.14106	-3.10484	0.00190381
B4GALT3	910.109	-0.212024	0.110186	-1.92425	0.0543236
B4GALT4	227.236	0.101053	0.153034	0.660329	0.509043
B4GALT5	1152.57	0.172241	0.0957409	1.79903	0.0720141
B4GALT6	159.972	0.169424	0.180299	0.939686	0.347379
B4GALT7	169.607	-0.464896	0.197611	-2.35258	0.0186438
B4GAT1	82.0279	-0.453179	0.238667	-1.89879	0.0575918
B9D1	74.6814	-0.117838	0.255796	-0.46067	0.645035
B9D2	25.4579	-0.947727	0.435399	-2.17669	0.0295041
BAAT	11.4377	0.284413	0.622862	0.456623	0.647942
BAAT_1	9.71289	0.666123	0.676767	0.984273	0.324981
BABAM1	1165.86	-0.201514	0.107138	-1.88089	0.0599865
BABAM2	379.841	0.13141	0.128429	1.02321	0.306208
BACE1	117.048	0.195082	0.20371	0.957645	0.338242
BACE1-AS	24.9432	-0.172389	0.408833	-0.42166	0.673273
BACH1	1159.72	0.215127	0.102179	2.1054	0.0352569
BACH2	374.591	-0.0381713	0.132374	-0.288359	0.773072
BACH2_1	271.089	0.0319051	0.154042	0.207119	0.835917
BAD	52.3203	-1.26068	0.401956	-3.13636	0.00171062
BAG1	775.044	0.1968	0.114243	1.72264	0.0849533
BAG2	1329.89	0.127035	0.0925009	1.37333	0.169648
BAG3	657.345	-0.260338	0.125433	-2.07551	0.037939
BAG4	846.141	0.168588	0.111332	1.51428	0.129955
BAG5	1092.66	0.13001	0.0962411	1.35088	0.176735
BAG6	4314.77	-0.407218	0.114523	-3.55578	0.000376863
BAG6_1	4395.67	-0.396103	0.114211	-3.46817	0.000524006
BAG6_2	4214.65	-0.399607	0.113298	-3.52705	0.000420214
BAG6_3	4211.82	-0.397917	0.113119	-3.51767	0.000435354
BAG6_4	4207.53	-0.397833	0.113578	-3.50273	0.000460521
BAG6_5	4404.75	-0.396301	0.114304	-3.46708	0.000526144
BAG6_6	4394.96	-0.396132	0.114158	-3.47004	0.000520378
BAGE2	330.519	0.0565618	0.132776	0.425996	0.670111
BAGE5	245.142	0.0997646	0.15012	0.664565	0.506329
BAHCC1	286.537	-0.873908	0.225813	-3.87005	0.000108811
BAHCC1_1	279.162	-0.815163	0.221927	-3.67311	0.000239617
BAHD1	676.948	-0.433218	0.14048	-3.08384	0.00204347
BAIAP2	314.435	-0.550088	0.195305	-2.81656	0.00485402
BAIAP2-DT	145.786	-0.109421	0.187956	-0.582164	0.560456
BAIAP2L1	1107.62	-0.0490986	0.0978128	-0.501965	0.615692
BAIAP3	21.9224	-1.3021	0.501885	-2.59441	0.00947522
BAK1	401.991	-0.191021	0.161079	-1.18589	0.235667
BAMBI	431.132	-0.0307262	0.126616	-0.242672	0.808259
BANF1	2087	-0.00338092	0.0856503	-0.0394735	0.968513
BANP	200.193	-0.354411	0.16008	-2.21397	0.0268308
BAP1	1194.18	-0.31645	0.128326	-2.46598	0.0136637
BARD1	391.302	0.203074	0.134163	1.51364	0.130117
BATF	13.8425	-0.273387	0.595777	-0.458874	0.646325
BATF2	98.0935	-0.197828	0.236513	-0.836436	0.402909
BATF3	15.4303	-0.518973	0.562125	-0.923234	0.355885
BAX	425.074	-0.368574	0.16284	-2.26341	0.0236105
BAZ1A	2204.5	0.263472	0.0972104	2.71033	0.00672165
BAZ1A-AS1	37.2652	0.457168	0.350131	1.3057	0.191653
BAZ1B	6174.16	0.117179	0.0830828	1.41039	0.158424
BAZ2A	3885.52	0.0295303	0.0791174	0.373247	0.708965
BAZ2B	538.66	0.109643	0.129297	0.847991	0.396443
BAZ2B-AS1	29.5535	0.115533	0.375181	0.307938	0.758129
BBC3	83.6105	-1.38324	0.304798	-4.53821	5.67325e-06
BBIP1	106.926	0.35365	0.225565	1.56784	0.116918
BBLN	481.376	-1.59786	0.493726	-3.23633	0.00121078
BBOF1	37.9828	0.285135	0.33905	0.840984	0.400357
BBOX1-AS1	42.7382	0.131031	0.322879	0.405821	0.684874
BBS1	166.891	-0.151394	0.18394	-0.823062	0.410473
BBS10	401.436	0.101856	0.137301	0.741846	0.458181
BBS12	268.994	0.175352	0.150094	1.16828	0.242694
BBS2	168.691	0.126374	0.174229	0.725333	0.468248
BBS4	568.97	0.135996	0.114907	1.18353	0.2366
BBS5	107.848	-0.0811857	0.217905	-0.372575	0.709465
BBS7	221.204	0.0684071	0.153612	0.445323	0.656086
BBS9	34.5233	0.673856	0.352134	1.91363	0.0556673
BBX	909.428	0.1953	0.111956	1.74443	0.0810835
BCAM	117.342	-0.935589	0.261268	-3.58096	0.000342332
BCAN	1899.19	-0.0610663	0.0882151	-0.692243	0.488785
BCAN_1	19.7985	-1.54195	0.638732	-2.41408	0.015775
BCAN-AS2	594.498	-0.122939	0.117486	-1.04641	0.295372
BCAN-AS2_1	531.85	-0.124725	0.122901	-1.01484	0.310181
BCAP29	15.6808	0.497423	0.52082	0.955076	0.339539
BCAP29_1	15.5092	0.475878	0.529723	0.898353	0.368998
BCAP31	3348.5	-0.0938516	0.0870792	-1.07777	0.281135
BCAR1	190.192	-1.13504	0.253726	-4.47349	7.69524e-06
BCAR1_1	178.457	-1.15852	0.260884	-4.44075	8.96455e-06
BCAR3	122.559	0.00906404	0.203424	0.0445574	0.96446
BCAS1	15.9828	0.0509128	0.525471	0.0968898	0.922814
BCAS2	791.802	0.222367	0.110519	2.01202	0.0442179
BCAS3	204.198	0.147851	0.159833	0.925034	0.354948
BCAT1	5597.48	0.243075	0.11883	2.04557	0.040799
BCAT2	340.609	-0.501091	0.194058	-2.58217	0.00981824
BCCIP	2026.14	0.0762547	0.0903692	0.843813	0.398774
BCDIN3D	79.5017	0.14516	0.242505	0.598585	0.549449
BCDIN3D-AS1	17.9141	0.0666017	0.518345	0.128489	0.897762
BCKDHA	306.469	-0.628556	0.152817	-4.11311	3.90356e-05
BCKDHB	214.028	0.174141	0.175995	0.989463	0.322437
BCKDK	365.642	-0.359767	0.144253	-2.494	0.0126314
BCL10	372.675	0.218529	0.14112	1.54854	0.121492
BCL2	54.7494	0.253035	0.295767	0.85552	0.392263
BCL2L1	1675.53	-0.203563	0.105001	-1.93867	0.0525413
BCL2L11	1007.56	0.0941959	0.123417	0.763232	0.445325
BCL2L12	688.847	-0.543925	0.151249	-3.59624	0.000322854
BCL2L13	1979.38	0.0458514	0.0881323	0.520257	0.602885
BCL2L1-AS1	41.5575	0.228804	0.332235	0.688683	0.491023
BCL2L2	438.783	0.0831875	0.12464	0.667422	0.504503
BCL3	27.2199	-0.718105	0.42508	-1.68934	0.0911543
BCL6	55.7655	-0.256981	0.288563	-0.890554	0.373169
BCL6B	99.581	-0.26173	0.217457	-1.20359	0.228746
BCL7A	522.593	-0.0706963	0.130374	-0.542259	0.58764
BCL7A_1	397.563	-0.040464	0.140646	-0.2877	0.773576
BCL7B	639.176	-0.275058	0.125398	-2.19348	0.0282726
BCL7C	214.364	-0.655646	0.216889	-3.02296	0.00250312
BCL9	147.66	0.0574198	0.190911	0.300768	0.763591
BCL9L	360.241	-0.98858	0.211034	-4.68446	2.80694e-06
BCLAF1	5549.52	0.211081	0.0957598	2.20428	0.0275048
BCLAF1P2	1290.03	0.163812	0.11124	1.47261	0.140857
BCLAF3	116.216	0.0709923	0.212988	0.333316	0.738896
BCO2	12.226	0.383679	0.588981	0.651428	0.51477
BCOR	2466.3	-0.188591	0.0950739	-1.98362	0.0472978
BCORL1	1030.76	-0.260179	0.122563	-2.12282	0.0337689
BCR	2108.93	-0.452795	0.129588	-3.49412	0.000475631
BCRP2	73.6942	-0.224171	0.251156	-0.892556	0.372095
BCRP3	34.0383	-0.405644	0.364758	-1.11209	0.2661
BCS1L	704.897	-0.103134	0.116653	-0.884113	0.376635
BCYRN1	1553.75	0.341002	0.0966076	3.52977	0.000415927
BDH2	133.951	0.101597	0.196873	0.516051	0.605819
BDP1	1529.95	0.168888	0.104811	1.61135	0.107103
BDP1_1	1525.45	0.170762	0.10518	1.62353	0.104476
BDP1_2	1531.84	0.167509	0.10481	1.59821	0.109996
BDP1_3	1552.81	0.170267	0.104109	1.63546	0.101953
BECN1	767.224	-0.00165416	0.103426	-0.0159937	0.987239
BEGAIN	23.3247	-0.535776	0.442555	-1.21064	0.226032
BEND3	185.517	-0.0601293	0.169856	-0.354001	0.723338
BEND3P3	59.2734	0.0398131	0.277463	0.14349	0.885903
BEND6	66.8243	0.266555	0.275622	0.967105	0.333492
BEND7	274.776	0.158453	0.142526	1.11175	0.266245
BEST1	50.1769	0.206423	0.302095	0.683305	0.494414
BET1	653.417	0.156906	0.11877	1.32109	0.186471
BET1L	1252.91	0.000292056	0.104011	0.00280793	0.99776
BEX1	18.8886	-0.352313	0.485917	-0.725048	0.468423
BEX2	458.058	-0.0633007	0.126461	-0.500556	0.616684
BEX4	4240.19	0.0763381	0.0846047	0.902292	0.366902
BFAR	999.382	0.156289	0.101283	1.54309	0.122809
BFAR_1	987.13	0.155504	0.102531	1.51666	0.129352
BGLT3	234.561	0.165961	0.150295	1.10423	0.269491
BHLHE40	2344.53	-0.0715615	0.0865028	-0.827274	0.408082
BICD1	374.413	0.0481964	0.136236	0.353772	0.72351
BICD2	1029.51	-0.144621	0.100666	-1.43665	0.150819
BICDL1	183.03	-0.391032	0.192585	-2.03044	0.0423119
BICRA	91.3512	-1.11642	0.262211	-4.25773	2.06515e-05
BICRAL	562.065	0.0920472	0.120948	0.761047	0.446629
BID	835.447	-0.263519	0.112976	-2.33253	0.0196729
BIN1	39.7446	-0.760765	0.347173	-2.19132	0.0284289
BIN2	10.4371	0.0186677	0.625733	0.0298333	0.9762
BIN3	294.404	-0.366145	0.142411	-2.57104	0.0101394
BIRC2	1142.89	0.174178	0.106087	1.64185	0.100622
BIRC3	29.7167	-0.138674	0.390304	-0.355298	0.722367
BIRC5	2101.22	-0.121059	0.09348	-1.29503	0.195311
BIRC6	2980.05	0.181406	0.101748	1.78289	0.0746044
BISPR	140.177	0.0458434	0.185522	0.247105	0.804827
BIVM	289.493	0.123921	0.147624	0.839436	0.401225
BLACAT1	313.451	0.00769638	0.139606	0.0551292	0.956036
BLCAP	474.558	0.0231349	0.130912	0.17672	0.859728
BLM	1648.38	0.142061	0.105222	1.35011	0.176981
BLMH	2531.32	0.0544602	0.0828978	0.656956	0.511209
BLOC1S1	144.205	0.158411	0.186675	0.848594	0.396107
BLOC1S2	543.148	0.0860893	0.118406	0.72707	0.467183
BLOC1S3	344.91	-0.0808815	0.143304	-0.564406	0.572478
BLOC1S4	234.834	0.0154366	0.168185	0.0917837	0.92687
BLOC1S6	1717.11	0.148452	0.102676	1.44582	0.148227
BLTP1	721.662	0.214402	0.116704	1.83714	0.0661894
BLTP2	4261.38	0.028293	0.0779195	0.363106	0.716526
BLTP3A	2471.94	0.0859614	0.107288	0.801222	0.423003
BLTP3B	469.102	0.19509	0.139051	1.40301	0.160614
BLVRA	736.342	0.139483	0.105292	1.32473	0.185261
BLVRB	1480.43	-0.710452	0.15089	-4.70841	2.49655e-06
BLZF1	574.6	0.253588	0.11639	2.17878	0.0293478
BMAL1	102.926	0.220444	0.22174	0.994152	0.320149
BMAL2	348.667	0.265596	0.137412	1.93285	0.0532547
BMF	225.801	-0.00787879	0.154659	-0.050943	0.959371
BMI1	27.5548	-0.396293	0.412732	-0.960171	0.336969
BMP1	214.644	-0.412152	0.172415	-2.39046	0.0168272
BMP10	29.6587	0.178245	0.401069	0.444424	0.656736
BMP2	13.882	0.568411	0.566206	1.00389	0.315429
BMP2K	1777.48	0.133992	0.100663	1.33109	0.183158
BMP6	22.4701	-0.023515	0.450086	-0.0522456	0.958333
BMP8A	25.15	0.157587	0.412171	0.382334	0.702214
BMP8B	41.5258	-0.318206	0.329088	-0.966934	0.333577
BMPR1A	370.617	0.289849	0.141946	2.04196	0.0411552
BMPR2	424.467	0.0805957	0.12257	0.657546	0.51083
BMS1	2612.95	0.0873308	0.0873499	0.999781	0.317416
BMS1P1	165.902	-0.0606833	0.175689	-0.345403	0.729792
BMS1P14	18.6766	-0.29988	0.486593	-0.616284	0.537707
BMS1P17	221.093	-0.048357	0.169994	-0.284464	0.776055
BMS1P18	219.562	-0.0481577	0.173941	-0.276862	0.781886
BMS1P2	36.3401	0.215109	0.340874	0.631053	0.528006
BMS1P20	842.31	0.115147	0.102594	1.12235	0.261715
BMS1P22	32.5478	-1.62974	0.428339	-3.80478	0.000141928
BMS1P23	62.5422	0.260379	0.264321	0.985088	0.324581
BMS1P2-AGAP9	12.3113	-0.529107	0.596688	-0.886739	0.37522
BMS1P4-AGAP5	30.705	-0.0247609	0.377959	-0.065512	0.947766
BMT2	199.115	0.0896652	0.165509	0.541755	0.587988
BMX	139.316	0.120868	0.215963	0.55967	0.575705
BNAT1	10.1052	-0.945081	0.685072	-1.37953	0.16773
BNAT1_1	10.4531	-0.920992	0.678643	-1.35711	0.174747
BNIP1	176.822	-0.114685	0.170079	-0.674302	0.500119
BNIP2	1455.35	0.238355	0.112273	2.123	0.0337537
BNIP3	382.395	0.134245	0.131341	1.02211	0.30673
BNIP3L	1445.2	0.164823	0.113492	1.45229	0.14642
BNIPL	23.9372	-0.0953794	0.45316	-0.210476	0.833296
BOD1	280.555	0.135926	0.145109	0.936719	0.348903
BOD1L1	1085.41	0.118668	0.112905	1.05104	0.293239
BOK	72.6186	-1.19074	0.38514	-3.0917	0.00199012
BOLA1	48.7901	-0.449329	0.330939	-1.35774	0.174546
BOLA2	152.921	-0.256047	0.198713	-1.28853	0.197563
BOLA2B	378.858	-0.615446	0.180113	-3.417	0.00063316
BOLA2-SMG1P6	446.93	0.291665	0.12753	2.28702	0.0221944
BOLA3	473.178	-0.00339297	0.122379	-0.0277251	0.977881
BOLA3-DT	186.212	0.00650235	0.174231	0.0373203	0.97023
BOP1	1224.59	-1.06621	0.350779	-3.03954	0.00236941
BOP1_1	226.667	-0.343552	0.167629	-2.04948	0.0404151
BORA	277.067	0.342158	0.170885	2.00227	0.0452558
BORCS5	116.42	-0.178531	0.209853	-0.850743	0.394912
BORCS5_1	120.185	-0.195788	0.207135	-0.94522	0.344547
BORCS6	50.49	-0.642642	0.357854	-1.79582	0.0725228
BORCS7	180.508	0.237895	0.170118	1.39841	0.16199
BORCS8	137.743	-0.219186	0.206153	-1.06322	0.287682
BPGM	684.227	0.175131	0.11138	1.57237	0.115865
BPHL	101.42	0.183918	0.230929	0.796426	0.425785
BPNT1	714.758	0.114858	0.111177	1.03311	0.301553
BPNT2	1511.53	0.241995	0.102482	2.36134	0.0182091
BPTF	2375.11	0.173359	0.0884803	1.95929	0.0500784
BRAF	929.148	0.143557	0.106593	1.34677	0.178055
BRAP	1061.09	0.0324816	0.0992373	0.327313	0.743431
BRAT1	415.489	-1.27433	0.479629	-2.6569	0.00788625
BRCA1	2662.97	0.190352	0.0923314	2.06161	0.0392445
BRCA2	640.939	0.141438	0.135899	1.04076	0.297988
BRCC3	763.938	0.252195	0.107749	2.34059	0.0192535
BRD1	393.251	-0.527108	0.138201	-3.81408	0.000136694
BRD2	4744.83	-0.0774204	0.0921649	-0.840021	0.400897
BRD2_1	4375.96	-0.0845186	0.0916108	-0.922583	0.356224
BRD2_2	1852	-0.0178417	0.099901	-0.178594	0.858256
BRD2_3	4519.12	-0.0715621	0.0915569	-0.781614	0.434442
BRD2_4	2487.68	0.0476555	0.0858043	0.555397	0.578623
BRD2_5	4864.38	-0.0689621	0.0909136	-0.758546	0.448124
BRD2_6	4382.29	-0.0824077	0.0918854	-0.896853	0.369797
BRD3	498.033	-0.3681	0.151158	-2.4352	0.0148837
BRD3OS	114.44	-0.139365	0.204648	-0.681001	0.495871
BRD4	1889.27	-0.299297	0.124208	-2.40964	0.0159683
BRD7	1741.57	0.153602	0.0986319	1.55733	0.119393
BRD8	2219.35	0.0118939	0.0828817	0.143505	0.885892
BRD9	1074.27	-0.207256	0.106467	-1.94667	0.0515741
BRF1	225.316	-0.749555	0.214564	-3.49339	0.000476929
BRF2	153.932	-0.318179	0.192374	-1.65396	0.0981349
BRI3	178.84	-0.223069	0.180083	-1.2387	0.215456
BRI3BP	818.681	0.0428494	0.107685	0.397913	0.690694
BRIP1	742.856	0.235666	0.123768	1.9041	0.0568975
BRIX1	241.768	-0.176884	0.163594	-1.08124	0.279591
BRK1	1983.56	0.102866	0.0886526	1.16033	0.245914
BRME1	94.4026	-0.20806	0.244954	-0.849384	0.395667
BRME1_1	95.5393	-0.192144	0.245408	-0.782956	0.433653
BRMS1	632.511	-0.453611	0.137224	-3.30562	0.00094768
BRMS1L	118.68	0.288071	0.202465	1.42282	0.154788
BROX	1242.22	0.208188	0.106607	1.95285	0.0508371
BRPF1	730.585	-0.163372	0.13171	-1.24039	0.214832
BRPF3	946.855	-0.0410813	0.102602	-0.400395	0.688866
BRPF3-AS1	21.0416	-0.175241	0.461697	-0.379557	0.704274
BRSK1	93.468	-0.406433	0.23443	-1.73371	0.0829703
BRSK2	15.091	-0.996548	0.591115	-1.68588	0.0918191
BRSK2_1	14.7783	-0.949885	0.594344	-1.59821	0.109997
BRWD1	1482.34	0.167255	0.107177	1.56055	0.11863
BRWD3	1653.46	0.219357	0.105419	2.08081	0.0374511
BSDC1	2578.76	-0.0450783	0.0883117	-0.510446	0.609739
BSG	6593.68	-0.928419	0.29463	-3.15113	0.00162638
BSG-AS1	52.8467	-0.287774	0.314401	-0.915307	0.36003
BSN	269.528	-0.628068	0.169866	-3.69744	0.000217784
BSPRY	10.2637	-0.201392	0.643171	-0.313124	0.754186
BST2	946.455	-0.353372	0.135445	-2.60897	0.00908158
BTAF1	1975.29	0.125909	0.0907218	1.38786	0.165181
BTBD1	2441.08	0.240201	0.102668	2.3396	0.0193042
BTBD10	322.424	0.114282	0.149517	0.764343	0.444663
BTBD19	50.808	0.0669324	0.29664	0.225635	0.821485
BTBD2	240.735	-1.08626	0.423939	-2.56229	0.0103984
BTBD3	320.262	0.183416	0.138208	1.3271	0.184477
BTBD7	485.056	0.0817891	0.122627	0.666972	0.50479
BTBD7_1	468.406	0.0694291	0.122266	0.567852	0.570135
BTBD8	59.8942	0.284081	0.299205	0.949452	0.342391
BTBD9	381.701	-0.0746406	0.131414	-0.567978	0.57005
BTD	139.566	-0.0310172	0.18648	-0.166329	0.867898
BTF3	11032.3	0.117466	0.0787236	1.49213	0.135664
BTF3L4	1653.83	0.207267	0.103421	2.00411	0.0450583
BTG1	1402.07	0.0303089	0.0970031	0.312453	0.754696
BTG1-DT	14.0567	0.0464651	0.563677	0.0824321	0.934303
BTG2	2630.43	-0.105721	0.0905724	-1.16726	0.243107
BTG2-DT	52.5014	-0.0937512	0.311404	-0.30106	0.763369
BTG3	190.462	0.186119	0.167915	1.10841	0.267684
BTG3_1	48.0102	0.112779	0.303553	0.37153	0.710243
BTG3-AS1_1	10.2003	-0.586113	0.657097	-0.891972	0.372408
BTK	3870.1	0.0998775	0.0915755	1.09066	0.275424
BTN1A1	21.4869	-0.043107	0.446372	-0.0965719	0.923066
BTN1A1_1	20.7724	0.0534928	0.454576	0.117676	0.906324
BTN2A1	538.005	0.0221393	0.119456	0.185335	0.852967
BTN2A1_1	527.104	0.0235614	0.119407	0.19732	0.843577
BTN2A2	399.371	0.02933	0.129653	0.226219	0.821031
BTN2A3P	80.4727	-0.0804372	0.243627	-0.330166	0.741275
BTN3A1	128.508	-0.155182	0.20642	-0.751776	0.452186
BTN3A2	129.561	-0.00196823	0.201262	-0.00977943	0.992197
BTN3A3	35.3652	0.189657	0.347976	0.545028	0.585734
BTNL9	149.315	-0.0220814	0.184319	-0.1198	0.904642
BTRC	708.984	0.12387	0.111435	1.11159	0.266313
BUB1	5178.05	0.204261	0.0934343	2.18615	0.0288047
BUB1B	1813.39	0.173758	0.0949292	1.83039	0.0671915
BUB3	2978.76	0.118754	0.0827054	1.43587	0.151039
BUD13	508.892	0.0413274	0.117622	0.351357	0.72532
BUD23	1786.68	-0.112778	0.0985844	-1.14397	0.252636
BUD31	1046.45	0.0614721	0.0951909	0.645777	0.518424
BVES	20.2366	0.322492	0.455582	0.707868	0.479027
BYSL	1112.53	-0.189506	0.121638	-1.55795	0.119245
BZW1	7562.49	0.208372	0.0896901	2.32324	0.0201662
BZW2	2314.16	0.137884	0.0899165	1.53347	0.125161
C10orf71	156.217	0.0319023	0.178963	0.178262	0.858517
C10orf71-AS1	10.4725	-0.365926	0.629877	-0.580948	0.561276
C10orf88	214.077	0.0495403	0.163638	0.302743	0.762085
C10orf88B	106.754	0.364667	0.228773	1.59401	0.110934
C10orf95-AS1	211.466	-0.00972987	0.158281	-0.061472	0.950983
C11orf21	373.749	-0.168266	0.147307	-1.14228	0.253338
C11orf24	362.1	-0.341409	0.14959	-2.2823	0.0224719
C11orf54	552.475	0.129362	0.125113	1.03396	0.301156
C11orf58	3546.97	0.185176	0.0850729	2.17668	0.0295048
C11orf65	20.2227	0.0520146	0.495787	0.104913	0.916445
C11orf68	300.17	-0.362557	0.157236	-2.30582	0.0211207
C11orf71	188.171	-0.102905	0.171588	-0.599722	0.548692
C11orf80	157.192	-0.0133472	0.180786	-0.0738287	0.941147
C11orf98	10.9891	-2.25827	0.685927	-3.29228	0.000993778
C12orf4	412.789	0.254922	0.125916	2.02454	0.0429143
C12orf40	42.094	0.545048	0.332549	1.639	0.101213
C12orf43	291.234	-0.0706499	0.14292	-0.494331	0.621072
C12orf56	11.552	0.121515	0.622489	0.195208	0.84523
C12orf57	326.981	-0.718493	0.175157	-4.10199	4.09615e-05
C12orf60	31.2631	0.177242	0.373402	0.474667	0.635024
C12orf76	202.689	0.135225	0.173235	0.780586	0.435046
C14orf119	736.301	0.0864637	0.118558	0.729293	0.465822
C14orf28	21.3997	0.199593	0.450039	0.443502	0.657403
C14orf93	152.922	-0.298793	0.183909	-1.62468	0.10423
C15orf39	778.781	-0.704516	0.171144	-4.11651	3.84646e-05
C15orf40	396.496	0.0296555	0.124185	0.238801	0.81126
C15orf61	52.359	-0.266468	0.285764	-0.932474	0.351092
C15orf62	25.7615	-0.285028	0.410557	-0.694247	0.487527
C16orf46	24.0903	-0.245524	0.446138	-0.550333	0.582091
C16orf46_1	24.5882	-0.223076	0.436885	-0.510605	0.609628
C16orf87	229.336	0.296343	0.158629	1.86815	0.0617407
C16orf95	78.9538	-0.551488	0.285355	-1.93264	0.0532811
C17orf100	36.6799	0.122509	0.344089	0.356038	0.721812
C17orf113	12.0631	-0.400178	0.603599	-0.662988	0.507339
C17orf58	246.735	0.192092	0.149772	1.28256	0.199646
C17orf67	21.2687	-0.568709	0.471343	-1.20657	0.227598
C17orf75	261.411	0.167842	0.148638	1.1292	0.258814
C17orf80	720.445	0.202584	0.109239	1.8545	0.0636679
C17orf99	144.057	-0.529761	0.198425	-2.66983	0.00758896
C18orf21	477.439	0.0496828	0.119058	0.4173	0.676459
C18orf32	24.0605	0.340203	0.456347	0.745492	0.455974
C18orf54	233.027	0.133238	0.159215	0.836842	0.402681
C18orf61	54.1481	-0.141585	0.289661	-0.488795	0.624987
C19orf12	421.576	-0.0617307	0.12551	-0.49184	0.622833
C19orf25	191.833	-1.15977	0.258226	-4.49132	7.07843e-06
C19orf44	104.771	-0.250294	0.23814	-1.05103	0.293243
C19orf47	269.184	-0.468249	0.193223	-2.42337	0.0153774
C19orf48P	1484.89	-0.677074	0.283112	-2.39155	0.0167776
C19orf53	762.136	-0.483353	0.145741	-3.31652	0.000911459
C19orf84	34.3942	-0.149982	0.362643	-0.413581	0.679181
C1D	633.648	0.262855	0.120403	2.18312	0.0290271
C1GALT1	914.359	0.202112	0.115274	1.75332	0.0795469
C1GALT1C1	861.102	0.280972	0.106451	2.63946	0.00830383
C1GALT1C1_1	877.027	0.284377	0.105625	2.69231	0.0070958
C1GALT1C1L	37.9033	0.030478	0.381511	0.0798877	0.936327
C1orf100	107.2	0.186764	0.208502	0.895741	0.370391
C1orf109	696.155	-0.00902946	0.108304	-0.0833712	0.933556
C1orf115	44.2639	0.175527	0.330008	0.531888	0.594803
C1orf116	327.017	-0.0959755	0.141411	-0.678697	0.49733
C1orf122	198.158	-0.264562	0.18861	-1.40269	0.160709
C1orf131	419.618	0.202424	0.130533	1.55075	0.120961
C1orf159	184.162	-1.78208	0.56616	-3.14766	0.00164581
C1orf174	594.635	-0.0707667	0.109948	-0.64364	0.519809
C1orf198	194.121	0.0790942	0.162222	0.487567	0.625857
C1orf216	492.056	-0.212602	0.1167	-1.82178	0.068488
C1orf220	27.6575	-0.270788	0.391977	-0.690827	0.489674
C1orf226	41.5976	-0.338434	0.333253	-1.01555	0.309845
C1orf35	292.682	-0.669217	0.189997	-3.52225	0.000427902
C1orf43	2584.09	0.0181147	0.0826285	0.219231	0.82647
C1orf50	277.134	0.0797026	0.144462	0.551722	0.581139
C1orf52	581.886	0.0145421	0.113761	0.127831	0.898283
C1orf54	20.3994	0.108448	0.473862	0.22886	0.818978
C1orf56	53.1258	-0.0586245	0.287407	-0.203977	0.838371
C1orf74	123.667	0.0679727	0.19635	0.346182	0.729206
C1QBP	3468.85	0.089032	0.0852214	1.04471	0.296155
C1QL3	26.8602	0.317241	0.407767	0.777998	0.43657
C1QTNF3	118.388	0.110908	0.204237	0.543037	0.587105
C1QTNF6	45.8821	-0.481405	0.32768	-1.46914	0.141796
C1RL	171.142	-0.0939436	0.180395	-0.520767	0.602529
C1RL_1	168.329	-0.0901247	0.181136	-0.497554	0.618798
C1RL-AS1	79.4107	0.188356	0.246235	0.764943	0.444305
C1RL-AS1_1	118.797	0.174065	0.204094	0.852866	0.393734
C2	12.4826	-0.103892	0.604518	-0.171859	0.863548
C2_1	12.4826	-0.103892	0.604518	-0.171859	0.863548
C2_2	12.3263	-0.141985	0.604803	-0.234763	0.814393
C2_4	12.4826	-0.103892	0.604518	-0.171859	0.863548
C2_5	12.4826	-0.103892	0.604518	-0.171859	0.863548
C20orf203	129.615	-0.166779	0.192907	-0.864558	0.387281
C20orf96	365.305	0.0597396	0.133895	0.446167	0.655477
C21orf58	247.109	-0.482982	0.181589	-2.65975	0.00781994
C21orf91	305.525	0.256854	0.14574	1.76241	0.0780002
C22orf23	30.6532	0.107093	0.385915	0.277504	0.781393
C22orf39	1868.46	0.0556525	0.0899509	0.618698	0.536115
C22orf46P	404.568	-0.286403	0.129356	-2.21406	0.0268244
C2CD2	329.368	0.0220901	0.141592	0.156012	0.876024
C2CD2L	560.657	-0.411561	0.139622	-2.94768	0.00320173
C2CD3	553.904	0.125851	0.115184	1.09261	0.274565
C2CD5	537.864	0.0944783	0.123213	0.76679	0.443207
C2orf15	19.8996	0.00227164	0.463467	0.0049014	0.996089
C2orf16	72.8909	-0.0391335	0.270009	-0.144934	0.884763
C2orf27A	178.945	0.251841	0.176772	1.42467	0.154254
C2orf27A_1	76.2619	0.292059	0.249568	1.17026	0.241897
C2orf42	116.571	-0.0996846	0.213664	-0.466548	0.640823
C2orf49	797.16	0.141008	0.104309	1.35183	0.176431
C2orf66	19.582	0.093093	0.482305	0.193017	0.846946
C2orf68	670.046	-0.0313438	0.111393	-0.28138	0.778419
C2orf69	535.267	0.161956	0.122558	1.32147	0.186345
C2orf76	87.6304	0.0576294	0.230601	0.249909	0.802657
C2orf92	27.9722	0.0505829	0.394352	0.128269	0.897936
C2orf92_1	19.6667	0.357214	0.467321	0.764388	0.444636
C3	233.096	-0.236742	0.160236	-1.47746	0.139551
C3AR1	172.442	0.00968971	0.17378	0.0557586	0.955534
C3orf18	37.5727	-0.708	0.340267	-2.08072	0.0374593
C3orf33	72.7144	0.201635	0.252898	0.797297	0.425278
C3orf38	372.719	0.141814	0.135905	1.04348	0.296724
C3orf52	86.8578	0.0541647	0.229987	0.235512	0.813811
C3orf52_1	39.7554	0.0977175	0.340551	0.286939	0.774159
C3orf62	137.037	-0.0966857	0.190858	-0.506584	0.612446
C3orf70	15.2021	0.014016	0.53526	0.0261854	0.979109
C3orf86P	30.1986	-0.0588879	0.398284	-0.147854	0.882458
C4A	106.872	-0.264698	0.214856	-1.23198	0.217958
C4A_1	104.985	-0.262645	0.219516	-1.19647	0.231511
C4A_2	113.038	-0.294967	0.21404	-1.37809	0.168175
C4B	107.625	-0.352992	0.214816	-1.64323	0.100335
C4B_1	105.431	-0.308049	0.215596	-1.42882	0.153055
C4B_2	103.306	-0.300239	0.21893	-1.37139	0.170252
C4B_2_1	103.504	-0.307232	0.222722	-1.37944	0.167758
C4B_3	101.87	-0.319832	0.224942	-1.42184	0.155072
C4orf3	516.364	0.0940575	0.119015	0.790301	0.429352
C4orf33	283.54	0.196308	0.160959	1.21961	0.222611
C4orf46	422.92	0.245379	0.130044	1.8869	0.0591742
C5	28.7644	0.252057	0.395728	0.636947	0.52416
C5orf15	832.403	0.0532115	0.118818	0.447842	0.654267
C5orf22	916.245	0.210588	0.115477	1.82363	0.0682073
C5orf24	1026.38	0.231445	0.0991054	2.33534	0.0195256
C5orf34	289.139	0.155012	0.155958	0.993934	0.320255
C5orf63	94.7347	0.122507	0.22036	0.555939	0.578253
C6orf120	837.935	0.117827	0.104866	1.1236	0.261183
C6orf132	17.8681	0.027342	0.487561	0.0560792	0.955279
C6orf136	395.178	-0.142332	0.144848	-0.98263	0.325789
C6orf136_1	392.868	-0.142688	0.144481	-0.987591	0.323353
C6orf136_2	395.335	-0.143435	0.144992	-0.989261	0.322535
C6orf136_3	393.582	-0.14744	0.144829	-1.01803	0.308664
C6orf136_4	395.178	-0.142332	0.144848	-0.98263	0.325789
C6orf136_5	396.014	-0.145855	0.14503	-1.00569	0.314563
C6orf136_6	397.107	-0.132634	0.145831	-0.909503	0.363085
C6orf141	23.0487	-0.0678899	0.423516	-0.160301	0.872644
C6orf147	84.989	-0.0510722	0.251302	-0.20323	0.838955
C6orf163	20.8391	0.240794	0.451509	0.533309	0.593819
C6orf47	522.631	-0.137663	0.125386	-1.09791	0.272243
C6orf47_1	550.576	-0.154938	0.118752	-1.30471	0.191991
C6orf47_2	520.657	-0.153651	0.124359	-1.23555	0.216627
C6orf47_3	518.471	-0.144771	0.125784	-1.15095	0.249752
C6orf47_4	555.713	-0.153338	0.119093	-1.28755	0.197902
C6orf47_5	555.713	-0.153338	0.119093	-1.28755	0.197902
C6orf47_6	556.345	-0.149874	0.119178	-1.25757	0.208548
C6orf52	82.6337	0.29735	0.242906	1.22413	0.220902
C6orf52_1	79.6403	0.313719	0.24871	1.26138	0.207171
C6orf62	2918.09	0.125572	0.0900158	1.395	0.163015
C6orf89	2600.23	0.144861	0.0841281	1.7219	0.0850869
C7orf25	173.199	0.0405347	0.18168	0.22311	0.82345
C7orf31	75.3763	0.0966489	0.251682	0.384013	0.700969
C7orf50	279.469	-1.03178	0.22875	-4.51051	6.46731e-06
C8orf33	1479.21	0.0501707	0.0907369	0.552925	0.580314
C8orf33_1	1458.19	0.0525571	0.0906212	0.579964	0.561939
C8orf44	107.859	0.139245	0.209417	0.664918	0.506103
C8orf58	11.5096	-0.695338	0.643109	-1.08121	0.279603
C8orf76	64.2067	-0.0161102	0.285948	-0.0563396	0.955071
C8orf82	143.247	-0.569864	0.194669	-2.92735	0.0034186
C8orf88	51.6468	-0.100995	0.303252	-0.33304	0.739104
C9orf40	253.6	0.227915	0.14668	1.55382	0.120228
C9orf72	286.329	0.28108	0.150891	1.8628	0.0624901
C9orf78	3670.39	0.0508745	0.0831829	0.611598	0.540804
C9orf85	195.359	0.148695	0.171579	0.866629	0.386145
CA1	101.455	-0.110441	0.233177	-0.473639	0.635758
CA11	118.198	-0.325614	0.207927	-1.566	0.117348
CA13	208.384	0.399076	0.179363	2.22497	0.0260833
CA14	18.0572	-0.00216581	0.478117	-0.00452987	0.996386
CA2	45.1615	-0.0378536	0.324252	-0.116741	0.907065
CA5BP1	182.123	-0.460543	0.173602	-2.65287	0.00798097
CA5BP1-CA5B	24.0286	-0.419704	0.43359	-0.967975	0.333057
CA8	3879.95	0.0862823	0.0831811	1.03728	0.299604
CAAP1	517.95	0.221159	0.118634	1.86421	0.0622925
CAB39	3621.68	0.189783	0.0825573	2.2988	0.0215163
CAB39L	124.369	0.078606	0.221711	0.354543	0.722932
CABCOCO1	22.7673	0.0162247	0.455751	0.0356	0.971601
CABIN1	1276.19	-0.336742	0.117752	-2.85975	0.00423977
CABLES1	122.4	-0.0800185	0.201431	-0.39725	0.691183
CABLES2	76.201	-0.228331	0.251123	-0.909238	0.363225
CACFD1	32.1598	-1.01874	0.504195	-2.02052	0.043329
CACFD1_1	33.4661	-0.981344	0.508516	-1.92982	0.0536293
CACNA2D2	21.2497	-0.138564	0.446816	-0.310114	0.756474
CACNB1	60.2444	-0.449159	0.298819	-1.50312	0.132809
CACNB2	49.5441	0.320157	0.302053	1.05994	0.289173
CACNB3	38.5881	0.0087084	0.362445	0.0240268	0.980831
CACTIN	323.679	-1.03901	0.22453	-4.6275	3.70109e-06
CACUL1	804.638	0.205769	0.107628	1.91184	0.0558962
CACYBP	5011.95	0.180858	0.0914021	1.97871	0.047849
CAD	2389.85	-0.189966	0.103457	-1.83618	0.0663304
CADM2	21.2085	0.264597	0.444468	0.595311	0.551636
CADM4	37.5538	-0.863238	0.346342	-2.49244	0.0126867
CALB1	183.556	-0.127694	0.170143	-0.750507	0.452949
CALCOCO1	625.31	-0.0878415	0.112427	-0.781321	0.434614
CALCOCO2	1443.26	0.108524	0.111393	0.974243	0.329936
CALCRL-AS1	32.2313	-0.18942	0.383891	-0.493423	0.621714
CALD1	10.1222	-0.271803	0.65918	-0.412334	0.680095
CALHM2	32.5382	-0.45299	0.378936	-1.19543	0.23192
CALHM5	15.7042	0.451866	0.519535	0.869751	0.384436
CALM1	1600.64	0.18864	0.0960682	1.96361	0.0495757
CALM2	8564.35	0.23672	0.0957768	2.47158	0.0134516
CALM3	2625.16	-0.188039	0.094923	-1.98096	0.0475955
CALML4	158.742	-0.0217642	0.179323	-0.121369	0.903399
CALN1	125.9	0.14667	0.202947	0.722704	0.469862
CALR	9861.95	-0.0377698	0.0852678	-0.442954	0.657799
CALU	4577.68	0.172296	0.0885059	1.94672	0.0515682
CAMK1	120.124	-0.146091	0.2041	-0.715781	0.474127
CAMK2A	14.0931	-0.563606	0.5466	-1.03111	0.302488
CAMK2D	229.707	0.187688	0.158514	1.18404	0.236397
CAMK2G	562.201	-0.015997	0.112358	-0.142375	0.886784
CAMK2N1	59.0581	-0.363689	0.290235	-1.25308	0.210175
CAMKK1	68.8487	-0.234419	0.268097	-0.874383	0.381909
CAMKK2	656.778	-0.0121387	0.111951	-0.108429	0.913655
CAMKMT	125.399	-0.00283949	0.20742	-0.0136896	0.989078
CAMKV	49.9618	0.01047	0.309504	0.0338285	0.973014
CAMLG	461.394	0.171305	0.12928	1.32507	0.185148
CAMSAP1	955.965	-0.134083	0.105128	-1.27542	0.20216
CAMSAP1-DT	251.556	-0.0880549	0.146839	-0.59967	0.548726
CAMSAP2	148.646	0.0711094	0.187481	0.379289	0.704473
CAMTA1	450.704	0.0695114	0.127623	0.54466	0.585987
CAMTA2	368.751	-0.42734	0.163101	-2.62009	0.00879066
CAMTA2-AS1	72.5956	0.00480196	0.261676	0.0183508	0.985359
CAND1	3929.13	0.166365	0.0977235	1.70241	0.0886791
CAND2	148.975	-0.433838	0.194976	-2.22508	0.0260759
CANT1	774.339	-0.181903	0.112519	-1.61664	0.105956
CANX	19044.1	0.191083	0.0853739	2.23819	0.0252088
CANX_1	19550.5	0.183348	0.0835883	2.19347	0.0282736
CAP1	4119.98	0.0758241	0.0786396	0.964196	0.334947
CAPG	241.451	-0.261437	0.164477	-1.58951	0.111945
CAPN1	2295.53	-0.598415	0.143258	-4.17719	2.95128e-05
CAPN10	162.623	-1.16945	0.293433	-3.98541	6.73629e-05
CAPN10-DT	130.058	-0.126822	0.206858	-0.613089	0.539817
CAPN11	37.8354	-0.184689	0.337877	-0.546617	0.584642
CAPN15	621.162	-1.39173	0.492204	-2.82754	0.00469071
CAPN1-AS1	99.9231	-0.0110764	0.228183	-0.0485418	0.961284
CAPN2	3641.07	-0.0184847	0.0815577	-0.226646	0.820699
CAPN5	10.3334	-0.680351	0.679246	-1.00163	0.316524
CAPN7	870.056	0.0776993	0.116421	0.667397	0.504518
CAPNS1	2370.54	-0.0825771	0.0894633	-0.923028	0.355993
CAPRIN1	8740.19	0.169091	0.0809415	2.08905	0.0367033
CAPRIN2	215.504	0.0776764	0.163333	0.475571	0.63438
CAPS	11.3928	-1.50424	0.709639	-2.11973	0.0340287
CAPZA1	6386.36	0.241473	0.0956454	2.52466	0.0115809
CAPZA2	2369.68	0.23501	0.0943025	2.49208	0.0126997
CAPZB	3181.99	-0.00766344	0.0814942	-0.0940366	0.92508
CARD10	107.565	-0.833509	0.241988	-3.44442	0.000572292
CARD11	789.103	-0.469163	0.132558	-3.53929	0.000401202
CARD19	44.7152	-0.792527	0.34911	-2.27014	0.0231993
CARD6	314.828	0.101216	0.135345	0.747839	0.454557
CARD8	413.937	0.133721	0.132201	1.0115	0.311779
CARD8-AS1	182.517	0.132619	0.166529	0.796372	0.425816
CARD9	43.8963	-1.14166	0.431192	-2.64769	0.00810446
CARF	82.8346	-0.15182	0.241209	-0.629414	0.529078
CARHSP1	1036.86	-0.179302	0.106077	-1.69029	0.0909716
CARM1	972.202	-0.416377	0.123966	-3.3588	0.000782805
CARMIL1	482.356	0.108337	0.127657	0.848658	0.396072
CARMIL2	79.8486	-0.94483	0.267037	-3.5382	0.000402857
CARNMT1	394.655	0.217497	0.133532	1.62881	0.103354
CARS1	1575.78	-0.0731778	0.106894	-0.68458	0.493609
CARS1_1	1540.06	-0.0608073	0.108327	-0.561328	0.574574
CARS2	449.902	-0.218055	0.141583	-1.54012	0.123532
CASC20	11.4226	0.463981	0.605884	0.765792	0.4438
CASC3	2007.33	0.0654969	0.0870914	0.752047	0.452023
CASC9	109.14	0.283466	0.227081	1.2483	0.21192
CASD1	236.355	0.443138	0.158504	2.79575	0.00517801
CASK	45.227	0.383534	0.311354	1.23183	0.218014
CASKIN2	122.08	-0.948206	0.231629	-4.09363	4.24668e-05
CASP10	694.962	0.0643826	0.109175	0.589719	0.555379
CASP2	1366.95	0.0547829	0.0917156	0.597312	0.550299
CASP3	810.045	0.116814	0.112886	1.0348	0.300762
CASP4	17.3385	0.549215	0.515729	1.06493	0.286908
CASP4_1	15.342	0.4485	0.541501	0.828254	0.407527
CASP6	457.09	0.123034	0.119945	1.02575	0.305009
CASP7	54.3575	0.154218	0.315839	0.488279	0.625352
CASP8	748.793	-0.0104327	0.12302	-0.0848046	0.932417
CASP8AP2	1355.7	0.186246	0.103196	1.80478	0.0711092
CASP8AP2_1	1405.31	0.178362	0.105098	1.6971	0.0896779
CASP9	451.928	-0.0830996	0.121539	-0.68373	0.494146
CASS4	572.977	-0.120223	0.115071	-1.04477	0.296131
CAST	1051.33	0.0941966	0.101947	0.923979	0.355497
CASTOR2	271.197	-0.27722	0.146924	-1.88683	0.0591835
CASTOR3P	229.573	-0.031142	0.16277	-0.191325	0.848271
CASZ1	16.2657	-0.61192	0.596123	-1.0265	0.304656
CAT	2126.54	0.0607879	0.0844147	0.72011	0.471457
CATSPER3	15.4545	0.151497	0.537235	0.281994	0.777948
CAV1	44.0463	0.187652	0.331869	0.56544	0.571774
CAV2	506.806	0.243897	0.123019	1.98259	0.0474133
CAVIN1	3339.57	-0.247072	0.093348	-2.64679	0.0081261
CAVIN2	476.763	0.0447614	0.123753	0.361699	0.717577
CAVIN2-AS1	22.4603	0.590905	0.44888	1.3164	0.188041
CAVIN4	20.7692	0.295333	0.467071	0.632309	0.527185
CBARP	21.4101	-2.46072	0.562913	-4.3714	1.23451e-05
CBFA2T2	451.277	-0.0373753	0.119787	-0.312016	0.755028
CBFA2T3	1328.99	-0.487064	0.128342	-3.79506	0.000147609
CBFB	1876.56	0.212981	0.0984332	2.16371	0.0304865
CBL	1664.4	0.0732904	0.096756	0.757477	0.448764
CBLB	388.821	0.152718	0.135202	1.12955	0.258665
CBLL1	1369.03	0.218901	0.0983267	2.22626	0.0259969
CBLL1-AS1	42.7852	-0.171374	0.316156	-0.542055	0.587781
CBLN3	16.1044	-0.111893	0.517566	-0.216192	0.828838
CBR1	287.828	0.0945546	0.145642	0.649226	0.516192
CBR3-AS1	32.8356	0.530271	0.373335	1.42036	0.155502
CBR4	385.622	0.206535	0.15096	1.36815	0.171266
CBS	3028.77	-0.606513	0.132699	-4.5706	4.8634e-06
CBSLR	17.9377	0.00846933	0.483059	0.0175327	0.986012
CBX1	1576.12	0.133322	0.0889546	1.49877	0.133934
CBX2	684.997	-0.407447	0.131209	-3.10534	0.00190063
CBX3	5692.49	0.227918	0.097383	2.34043	0.0192613
CBX4	319.778	-0.55773	0.156658	-3.56017	0.000370615
CBX5	5224.07	0.242852	0.0947503	2.56308	0.0103749
CBX6	512.936	-0.388499	0.155353	-2.50076	0.0123928
CBX7	63.2529	-0.223419	0.266617	-0.83798	0.402042
CBX8	154.89	-0.472754	0.216932	-2.17927	0.0293117
CBY1	92.6954	0.0809977	0.227567	0.35593	0.721893
CC2D1A	417.424	-0.801671	0.182981	-4.38117	1.18044e-05
CC2D1A_1	411.973	-0.799913	0.180403	-4.43403	9.24897e-06
CC2D1B	739.576	-0.339282	0.12893	-2.63153	0.00850007
CC2D2A	15.833	0.334438	0.54872	0.609487	0.542201
CC2D2B	15.6682	-0.317457	0.538155	-0.5899	0.555258
CCAR1	3155.15	0.243402	0.0918277	2.65064	0.00803392
CCAR2	2331.88	-0.216603	0.0967193	-2.2395	0.0251233
CCDC102A	30.3598	-0.774087	0.392378	-1.97281	0.0485172
CCDC102B	20.2002	0.328622	0.45818	0.717233	0.47323
CCDC103	20.8614	-0.3553	0.449826	-0.78986	0.429609
CCDC106	276.448	-0.819967	0.209287	-3.91791	8.9321e-05
CCDC112	113.696	0.409101	0.234517	1.74444	0.0810828
CCDC113	143.455	-0.0594127	0.20146	-0.29491	0.768062
CCDC115	683.98	-0.241065	0.124882	-1.93035	0.053564
CCDC116	50.2639	-0.651353	0.321729	-2.02454	0.0429147
CCDC117	962.95	0.184407	0.10823	1.70385	0.0884098
CCDC12	474.032	-0.419665	0.160803	-2.60981	0.00905917
CCDC120	62.6777	-0.232129	0.280986	-0.826123	0.408734
CCDC120_1	68.0076	-0.334767	0.274185	-1.22095	0.222105
CCDC121	106.181	0.0388204	0.212869	0.182367	0.855294
CCDC124	525.826	-1.46416	0.490901	-2.98259	0.00285817
CCDC125	414.777	0.143234	0.128761	1.1124	0.265968
CCDC125_1	398.282	0.166185	0.129912	1.27921	0.200822
CCDC126	79.1825	0.176666	0.249387	0.7084	0.478697
CCDC127	417.521	0.0389455	0.125426	0.310507	0.756176
CCDC13	15.7816	-0.216885	0.534914	-0.405458	0.685141
CCDC134	95.2677	-0.284116	0.231825	-1.22556	0.220364
CCDC136	585.057	-0.00769448	0.118622	-0.0648655	0.948281
CCDC137	678.81	-0.436804	0.147537	-2.96063	0.00307007
CCDC138	474.037	0.213231	0.137959	1.54561	0.122199
CCDC14	1654.09	0.150101	0.102484	1.46464	0.14302
CCDC141	27.8985	0.646161	0.413987	1.56082	0.118565
CCDC142	116.219	-0.295181	0.213371	-1.38342	0.166537
CCDC144NL-AS1	203.436	0.0700983	0.169774	0.412891	0.679687
CCDC146	11.6637	-0.0522296	0.596052	-0.0876259	0.930174
CCDC148	14.2913	0.666853	0.551989	1.20809	0.227012
CCDC149	9.89482	-0.118108	0.642883	-0.183715	0.854237
CCDC15	116.368	0.173743	0.226138	0.768307	0.442305
CCDC150	378.247	0.188756	0.145234	1.29967	0.193715
CCDC157	12.7147	-0.520229	0.585606	-0.888361	0.374347
CCDC159	62.2215	-0.653924	0.270352	-2.41879	0.0155724
CCDC162P	421.562	-0.0542736	0.124491	-0.435965	0.662862
CCDC163	90.292	0.0194046	0.228016	0.0851021	0.93218
CCDC167	172.304	-0.161507	0.178677	-0.903903	0.366047
CCDC168	20.0002	0.199276	0.488604	0.407848	0.683385
CCDC169	90.9526	-0.114136	0.227469	-0.501764	0.615833
CCDC17	27.7008	-0.34125	0.392104	-0.870304	0.384134
CCDC171	9.9688	0.336922	0.650669	0.517809	0.604592
CCDC174	354.684	0.101105	0.132809	0.76128	0.44649
CCDC178	11.6451	0.751518	0.601053	1.25034	0.211177
CCDC18	598.962	0.234509	0.120982	1.93838	0.0525766
CCDC183	23.8957	0.0117108	0.478274	0.0244855	0.980465
CCDC183-AS1	44.871	-0.379295	0.340164	-1.11504	0.264835
CCDC186	360.526	0.0736113	0.147701	0.49838	0.618216
CCDC18-AS1	422.668	0.0186907	0.128185	0.14581	0.884071
CCDC191	17.6728	-0.235326	0.486827	-0.483387	0.628821
CCDC22	248.807	-0.684216	0.194769	-3.51296	0.00044314
CCDC24	19.6907	-0.833813	0.495632	-1.68232	0.0925064
CCDC25	804.331	0.246245	0.121328	2.02958	0.0423993
CCDC26	110.464	-0.0483062	0.204941	-0.235708	0.813659
CCDC28A	204.961	0.140063	0.18459	0.758776	0.447986
CCDC28B	213.355	-0.664362	0.18339	-3.62267	0.000291574
CCDC30	27.3645	-0.141476	0.413999	-0.341731	0.732553
CCDC32	359.381	0.141469	0.134111	1.05487	0.291485
CCDC34	696.339	0.250764	0.118025	2.12466	0.0336146
CCDC39	38.5455	0.151108	0.366407	0.412406	0.680042
CCDC43	697.849	0.184919	0.118339	1.56262	0.118141
CCDC47	4157.67	0.172069	0.0928127	1.85394	0.0637477
CCDC50	1429.89	0.143779	0.101835	1.41189	0.157983
CCDC51	247.191	-0.246967	0.160784	-1.53602	0.124534
CCDC57	272.532	-0.560149	0.196942	-2.84423	0.00445185
CCDC59	779.902	0.306475	0.103509	2.96086	0.00306786
CCDC6	1251.47	0.171758	0.0938933	1.82929	0.0673563
CCDC61	60.3475	-0.868458	0.329897	-2.63251	0.00847557
CCDC62	36.8133	0.384963	0.352577	1.09186	0.274897
CCDC65	18.9275	-0.269909	0.474004	-0.569423	0.569069
CCDC66	388.128	0.0676311	0.132993	0.508531	0.611081
CCDC69	730.14	0.124917	0.104971	1.19001	0.234041
CCDC7	72.9995	0.264307	0.266992	0.989943	0.322202
CCDC71	149.011	-0.345441	0.212431	-1.62613	0.103922
CCDC71L	557.873	-0.0312709	0.133558	-0.234137	0.814878
CCDC74A	46.1415	-0.752817	0.324663	-2.31876	0.0204078
CCDC74B	14.5547	-0.929312	0.570427	-1.62915	0.103281
CCDC74B_1	15.5278	-0.879457	0.576508	-1.52549	0.127137
CCDC77	376.745	0.163332	0.132992	1.22813	0.219398
CCDC78	50.7706	-1.10742	0.353592	-3.13192	0.0017367
CCDC8	539.427	-0.431145	0.135456	-3.18293	0.00145795
CCDC80	41.4318	-0.0362434	0.325683	-0.111284	0.911391
CCDC82	865.314	0.21234	0.121142	1.75281	0.0796344
CCDC85B	40.4704	-2.09963	0.507099	-4.14046	3.46606e-05
CCDC85C	374.777	-0.343792	0.155228	-2.21475	0.026777
CCDC86	1032.39	-0.619984	0.173378	-3.57591	0.000349014
CCDC88A	1723.62	0.201609	0.114328	1.76343	0.0778282
CCDC88B	100.569	-1.18227	0.32082	-3.68515	0.000228566
CCDC88C	374.618	-0.302226	0.144466	-2.09201	0.0364374
CCDC9	447.314	-0.73138	0.168602	-4.33791	1.43842e-05
CCDC90B	583.1	0.13712	0.113793	1.205	0.228205
CCDC91	682.81	0.279332	0.112108	2.49164	0.0127156
CCDC92	467.475	-0.260178	0.138011	-1.8852	0.0594034
CCDC92_1	299.097	-0.286931	0.173904	-1.64994	0.0989555
CCDC93	853.595	0.107878	0.101784	1.05987	0.289205
CCDC97	477.665	-0.307283	0.142757	-2.15249	0.0313584
CCDC9B	19.7719	-0.378896	0.464894	-0.815016	0.415063
CCHCR1	353.575	-0.458082	0.147239	-3.11113	0.0018637
CCHCR1_1	332.096	-0.540416	0.150734	-3.58523	0.000336786
CCHCR1_2	333.168	-0.536495	0.149663	-3.58469	0.000337473
CCHCR1_3	370.885	-0.558407	0.151461	-3.6868	0.00022709
CCHCR1_4	370.19	-0.561742	0.151964	-3.69654	0.000218555
CCHCR1_5	434.655	-0.565521	0.151077	-3.74326	0.000181651
CCL2	78.2268	0.113067	0.252791	0.447274	0.654677
CCL3L1	11.8588	-0.107174	0.602362	-0.177923	0.858784
CCM2	419.575	-0.430031	0.157182	-2.73589	0.00622121
CCN1	62.9758	0.122369	0.280198	0.436725	0.662311
CCNA2	2482.44	0.127273	0.0960478	1.3251	0.185138
CCNB1	3394.53	0.113099	0.0909036	1.24416	0.213441
CCNB1IP1	1458.23	0.172662	0.108493	1.59146	0.111506
CCNB1IP1_1	1427.46	0.174884	0.109081	1.60325	0.10888
CCNB2	1921.19	0.0813255	0.0892942	0.910759	0.362422
CCNC	1773.91	0.189913	0.0998835	1.90134	0.0572575
CCND1	250.859	-0.276563	0.14914	-1.85438	0.0636846
CCND2	1242	0.010593	0.0974788	0.10867	0.913464
CCND3	3567.18	-0.320358	0.120816	-2.65163	0.00801043
CCNDBP1	691.684	0.102981	0.109026	0.944554	0.344886
CCNE1	664.332	-0.025319	0.108543	-0.233262	0.815558
CCNE2	256.525	0.264891	0.15202	1.74247	0.0814255
CCNF	1072.03	-0.190678	0.107713	-1.77024	0.0766864
CCNG1	4099.29	0.274093	0.10529	2.60321	0.00923543
CCNG2	109.796	0.202912	0.238037	0.852438	0.393971
CCNH	1117.95	0.0875282	0.11511	0.760385	0.447025
CCNI	3199.58	0.190793	0.0877226	2.17495	0.0296335
CCNI2	12.965	-0.174162	0.60253	-0.289051	0.772543
CCNJ	608.68	0.215176	0.119466	1.80115	0.0716791
CCNJL	32.4006	-0.242394	0.366816	-0.660807	0.508736
CCNK	394.961	0.153283	0.131012	1.16999	0.242003
CCNL1	1258.36	0.0666604	0.101289	0.658122	0.51046
CCNL2	3018.22	-0.244422	0.0854818	-2.85935	0.00424511
CCNQ	154.034	-0.469242	0.186981	-2.50957	0.012088
CCNT1	2391.66	0.18716	0.0988494	1.89338	0.058307
CCNT2	1190.35	0.232713	0.104601	2.22476	0.026097
CCNT2-AS1	19.31	0.366891	0.483071	0.759497	0.447555
CCNY	1936.67	0.0161934	0.0880346	0.183943	0.854058
CCNYL1	222.465	0.162229	0.157104	1.03262	0.30178
CCP110	638.861	0.167223	0.120523	1.38748	0.165296
CCPG1	416.588	0.220892	0.156279	1.41344	0.157525
CCR10	10.0963	-1.46636	0.700409	-2.09357	0.0362979
CCR3	19.1088	-0.234239	0.475151	-0.492978	0.622028
CCR5AS	25.7271	0.240066	0.412858	0.581475	0.56092
CCR7	16.7545	-0.264619	0.499196	-0.530091	0.596049
CCRL2	92.5608	-0.230607	0.230971	-0.998426	0.318073
CCS	221.314	-0.685365	0.189718	-3.61254	0.000303212
CCSAP	468.357	0.161545	0.133154	1.21322	0.225045
CCSER2	541.151	0.210828	0.137659	1.53153	0.125639
CCT2	8190.78	0.146926	0.0831052	1.76796	0.0770683
CCT3	11012.4	0.0250262	0.0732186	0.341802	0.7325
CCT4	5726.73	0.176692	0.0890623	1.98391	0.047266
CCT5	13589.4	0.110546	0.0767509	1.44032	0.149777
CCT6A	8960.77	0.142088	0.0809834	1.75453	0.0793399
CCT6B	11.4354	0.478153	0.61592	0.776323	0.437558
CCT6P1	270.558	-0.0561075	0.148772	-0.377137	0.706072
CCT6P3	269.725	0.182084	0.150913	1.20655	0.227607
CCT7	8439.98	0.0282395	0.0759681	0.371728	0.710095
CCT8	10166.9	0.188582	0.0923598	2.04181	0.0411699
CCT8_1	10139.2	0.189825	0.0923858	2.0547	0.0399079
CCZ1	1419.64	0.215922	0.105309	2.05037	0.0403279
CCZ1B	1297.72	0.227332	0.105856	2.14756	0.0317485
CCZ1P-OR7E38P	221.242	0.0156179	0.156774	0.0996203	0.920646
CD101	21.7898	0.256735	0.445808	0.575886	0.564692
CD101-AS1	11.7497	-0.547867	0.652899	-0.83913	0.401396
CD109	79.5906	0.251974	0.256217	0.983439	0.325391
CD151	1231.54	-0.595644	0.159512	-3.73416	0.000188344
CD163L1	113.751	0.104701	0.212374	0.493001	0.622012
CD164	5397.36	0.177554	0.0931316	1.90649	0.0565873
CD19	40.0788	-0.688841	0.337591	-2.04046	0.0413045
CD200R1	12.817	-0.761836	0.575598	-1.32355	0.185651
CD207	42.1099	-0.0108233	0.325106	-0.0332917	0.973442
CD22	18.8125	0.166348	0.482948	0.344443	0.730514
CD226	53.6961	0.18249	0.293361	0.622065	0.533899
CD24	2470.46	0.186544	0.104367	1.78738	0.0738766
CD244	18.8919	0.261197	0.491395	0.531541	0.595044
CD276	655.947	-0.516125	0.147843	-3.49105	0.000481134
CD2AP	2635.43	0.229534	0.092315	2.48642	0.0129035
CD2BP2	1222.52	-0.161896	0.116414	-1.39069	0.164319
CD2BP2-DT	35.7914	0.166612	0.347668	0.479229	0.631776
CD300A	12.49	0.0551937	0.607041	0.0909225	0.927554
CD300A_1	12.1566	-0.02127	0.608055	-0.0349805	0.972095
CD320	314.282	-0.884027	0.223572	-3.9541	7.68249e-05
CD33	1005.32	-0.0467599	0.0955978	-0.489131	0.624749
CD37	201.259	-0.560477	0.184541	-3.03713	0.00238842
CD3D	240.935	-0.0280105	0.149424	-0.187456	0.851303
CD3E	30.8894	0.0348329	0.381881	0.0912138	0.927323
CD3G	18.5603	-0.186809	0.490602	-0.380776	0.70337
CD44	810.463	0.0449008	0.104459	0.429842	0.667311
CD46	4830.78	0.179024	0.0946896	1.89064	0.0586726
CD47	1445.57	0.252534	0.113985	2.2155	0.0267258
CD52	453.415	0.0781534	0.118693	0.658449	0.510249
CD53	2207.62	0.14522	0.0879205	1.65172	0.0985923
CD55	1475.7	0.206694	0.100569	2.05525	0.0398544
CD58	386.068	0.255526	0.132474	1.92887	0.0537464
CD59	3206.13	0.105994	0.0800454	1.32417	0.185445
CD63	3766.54	-0.0748941	0.0795729	-0.941201	0.346602
CD63-AS1	76.1085	-0.00945869	0.247834	-0.0381653	0.969556
CD68	465.023	-0.0195251	0.132954	-0.146856	0.883245
CD69	864.139	0.212908	0.124965	1.70374	0.0884306
CD80	57.2846	0.0834319	0.288198	0.289495	0.772203
CD81	1570.5	-0.463991	0.128077	-3.62274	0.000291495
CD82	63.3565	-0.783367	0.299683	-2.61398	0.00894933
CD83	101.902	-0.0156736	0.228945	-0.0684599	0.94542
CD84	613.179	-0.0373234	0.117655	-0.317228	0.75107
CD9	234.503	0.0760951	0.152733	0.498224	0.618326
CD93	47.2473	-0.209856	0.320334	-0.655117	0.512392
CD96	61.8038	0.243911	0.281824	0.865475	0.386778
CD99	869.324	-0.156145	0.115501	-1.3519	0.176407
CD99_1	888.81	-0.165256	0.116678	-1.41634	0.156676
CD99L2	418.508	-0.134884	0.134567	-1.00235	0.316175
CD99P1	27.2107	0.366265	0.404428	0.905637	0.365128
CD99P1_1	27.5586	0.358709	0.40094	0.89467	0.370964
CDADC1	94.2443	-0.0302611	0.23239	-0.130217	0.896395
CDAN1	335.306	-0.342907	0.147317	-2.32768	0.019929
CDC123	2191.81	0.106666	0.0944602	1.12921	0.258808
CDC14A	754.905	0.188621	0.105985	1.77969	0.0751272
CDC14B	362.817	0.0721138	0.131069	0.550196	0.582185
CDC16	1377.98	0.132296	0.0989343	1.33721	0.181155
[truncated: 15,023 more rows]
