# Supplementary material for: ACSL4-Associated Lipid Metabolism is a Distinct Therapeutic Vulnerability in KMT2A-Rearranged Acute Myeloid Leukemia
Source: Research Square preprint supplement (doi:10.21203/rs.3.rs-4924771/v1), 2024-10-15
Supplement: Supplementary file 2 [file 4f2a657651cd687822a9e12b.xlsx]

## Sheet: CCLE mutations_AML
Supplementary Table S1A: Clinically relevant mutations of differerent AML cell lines
Name	THP1	MV411	MOLM13	OCIAML2	NB4	SKNO1	MOLM14	HEL	KASUMI1	NOMO1	SHI1	HEL9217	M07E	OCIAML3	MONOMAC1	TF1	AML193	P31FUJ	CMK115	U937	HDMYZ	SET2	OCIM2	MUTZ8
ACSL4 Dependency	Yes	Yes	Yes	Yes	Yes	Yes	Yes	Yes	Yes	Yes	No	No	No	No	No	No	No	No	No	No	No	No	No	No
TP53	mutated				mutated	mutated		mutated	mutated	mutated	mutated	mutated			mutated	mutated		mutated	mutated		mutated	mutated	mutated
NRAS	mutated												mutated	mutated		mutated	mutated	mutated			mutated		mutated
FLT3		mutated	mutated	mutated			mutated								mutated
NOTCH1																	mutated
KMT2A			mutated	mutated			mutated
KMT2B						mutated		mutated				mutated				mutated			mutated
KMT2C																mutated
KMT2D								mutated				mutated		mutated						mutated
BRCA2			mutated				mutated						mutated						mutated
ASXL1															mutated
ASXL2																								mutated
RUNX1															mutated			mutated
PRKCE								mutated				mutated
KRAS					mutated					mutated	mutated
TET2
CDKN2A				mutated					mutated
JAK1
JAK2								mutated				mutated										mutated		mutated
JAK3																			mutated	mutated
EZH2																		mutated
DNMT3A				mutated										mutated				mutated
PTEN																		mutated		mutated
KIT						mutated			mutated
STAG2																								mutated
WT1
CEBPA
NPM1														mutated

## Sheet: Fusions_AML
Supplementary Table S1B: Clinically relevant gene fusions of differerent AML cell lines
Name	THP1	MV411	MOLM13	OCIAML2	NB4	SKNO1	MOLM14	HEL	KASUMI1	NOMO1	SHI1	HEL9217	M7E	OCIAML3	MONOMAC1	TF1	AML193	P31FUJ	CMK115	U937	HDMYZ	SET2	OCIM2	MUTZ8
ACSL4 Dependency	Yes	Yes	Yes	Yes	Yes	Yes	Yes	Yes	Yes	Yes	No	No	No	No	No	No	No	No	No	No	No	No	No	No
KMT2A	fusion	fusion	fusion	fusion			fusion			fusion	fusion				fusion
MLLT3	fusion		fusion				fusion			fusion					fusion
RUNX1						fusion			fusion														fusion
RUNX1T1						fusion			fusion
MLLT1																		fusion		fusion
AFDN				fusion							fusion
PICALM																		fusion		fusion
RARA					fusion
PML					fusion

## Sheet: ACSL4 dependency pan-cancer
Supplementary Table S1C: ACSL4 dependency of cell lines of different cancer entities
	AML KMT2Ar	Non-Hodgkin Lymphoma	Myeloproliferative Neoplasms	B-Lymphoblastic Leukemia/Lymphoma	AML KMT2A WT	T-Lymphoblastic Leukemia/Lymphoma	Mature B-Cell Neoplasms	Bladder Urothelial Carcinoma	Renal Cell Carcinoma	Intraductal Papillary Neoplasm of the Bile Duct	Pancreatic Adenocarcinoma	Pleural Mesothelioma	Rhabdomyosarcoma	Endometrial Carcinoma	Esophageal Squamous Cell Carcinoma	Melanoma	Hepatocellular Carcinoma	Esophagogastric Adenocarcinoma	Lung Neuroendocrine Tumor	Diffuse Glioma	Non-Small Cell Lung Cancer	Embryonal Tumor	Ewing Sarcoma	Ovarian Epithelial Tumor	Head and Neck Squamous Cell Carcinoma	Cervical Squamous Cell Carcinoma	Invasive Breast Carcinoma	Osteosarcoma	Colorectal Adenocarcinoma	Neuroblastoma
Median	-0.770655	-0.721463	-0.345378	-0.297197	-0.242756	-0.127355	-0.532012	-0.214977	-0.17961	-0.167958	-0.165648	-0.1614	-0.147316	-0.147257	-0.139073	-0.135102	-0.125321	-0.12171	-0.11894	-0.113147	-0.112814	-0.108282	-0.103907	-0.103779	-0.101352	-0.0981038	-0.0901808	-0.0890886	-0.0777882	-0.0597789
	-0.770655	-0.721463	-0.345378	-0.297197	-0.242756	-0.127355	-0.532012	-0.214977	-0.17961	-0.167958	-0.165648	-0.1614	-0.147316	-0.147257	-0.139073	-0.135102	-0.125321	-0.12171	-0.11894	-0.113147	-0.112814	-0.108282	-0.103907	-0.103779	-0.101352	-0.0981038	-0.0901808	-0.0890886	-0.0777882	-0.0597789
	-0.390337	-1.34302	-1.06513	-0.228869	-0.352696	-0.0686397	-0.20534	-0.214039	-0.160239	-0.0614542	-0.257682	-0.0555318	-0.545549	-0.147257	0.021162	0.00740457	-0.12671	-0.0806469	-0.128214	-0.030581	-0.140992	-0.513639	-0.259454	-0.056656	-0.0157574	-0.117619	0.0215752	-0.0624666	-0.138704	-0.232957
	-0.252442	-0.721463	-0.190732	-0.510909	-0.133174	-0.127355	-0.230022	-0.453044	0.0446332	-0.320427	-0.220234	-0.243544	-0.0721062	-0.155931	0.0318091	0.000627033	-0.192032	-0.148771	0.016816	-0.112626	-0.118775	-0.0290159	-0.217511	-0.059169	-0.0505385	-0.117121	-0.0638029	-0.201102	0.0338793	-0.106601
	-0.506968	-0.448836	-0.259494	-0.224704	0.342143	-0.131558	-0.667766	-0.177691	-0.0749549	-0.171541	-0.154772	-0.212955	-0.326138	-0.135045	0.0789484	-0.129728	-0.0987248	-0.130152	-0.0675699	-0.539848	-0.112814	-0.220763	-0.455908	0.149153	-0.198278	0.00654342	-0.0446427	-0.278384	-0.00903973	-0.0335471
	-1.19961		-0.0814736	-2.0344	-0.0812943	-1.0004	-0.588278	-0.051577	0.259826	-0.0995946	-0.38374	-0.111391	-0.0714203	0.0247913	-0.240475	-0.264766	-0.281919	-0.284725	-0.131886	-0.193594	0.0512055	-0.12547	-0.423949	0.0485611	-0.077003	-0.197715	-0.14165	0.00850126	-0.027942	-0.0732079
	-0.836262		-0.524899	-0.824183	-0.218996	-0.0929927	-0.689653	-0.138053	-1.22066	-0.147791	-0.0693217	-0.1614	0.0464648	-0.000440695	-0.124905	-0.418206	-0.125321	-0.124785	-3.53385e-05	-0.125745	-0.19917	0.228	0.0596024	-0.669275	-0.322085	-0.0981038	-0.086658	-0.4643	0.262189	-0.538511
	-1.04638		-0.615665	-0.912799	-0.618005		-0.754437	-0.236056	-0.903391	-0.278562	0.0513094	-0.394252	0.191786	-0.160472	-0.0980759	-0.0618332	-0.0961152	-0.388011	-0.0723279	0.00542827	-0.250238	0.813263	-0.103907	-0.239652	-0.0133372	-0.14414	-0.00512587	-0.0769472	-0.186165	0.0740432
	-0.705048		-0.338004	-0.186162	-0.819748		-0.968328	-0.342473	-0.223816	-0.181906	0.0347799	-0.0828311	-0.339774	-0.0238259	0.121318	-0.153344	-0.13139	-0.132343	0.0317498	-0.176607	-0.115734	-0.145405	-0.0335232	-0.193764	-0.118286	-0.0293484	-0.0380654	-0.0184647	-0.0712812	0.107419
	-1.50549		-0.160773	-0.106657	-0.206208		-0.708359	-0.270382	-0.303718	0.0109151	-0.386061	0.0318768	0.0556122	-0.194796	-0.00247762	-0.0853888	0.0121972	-0.149622	-0.126706	-0.121273	-0.0262965	-0.0020457	0.000393405	-0.224983	-0.145802	-0.0429456	-0.332495	-0.21545	-0.107883	0.13794
			-0.352752	-0.365524	-0.256977		-0.234672	-0.0297759	0.122247	-0.170854	-0.156772	-0.00115854	-0.179373	-0.309719	-0.138263	-0.224686	-0.112121	0.0624198	-0.125016	-0.145543	0.0810185	0.111531	0.0246599	-0.35994	0.0093822	-0.0388738	-0.148286	-0.159074	-0.203711	0.688193
			-0.379392	0.578247	-0.212193		-0.570467	-0.28487	-0.135999	-0.095646	-0.366539	-0.111617	-0.214058	-0.811547	-0.17226	-0.469263	-0.124281	-0.248801	-0.171994	0.0297521	0.014927	-0.0956971	-0.133967	-0.135246	-0.0897901	-0.211525	0.0539334	0.169473	-0.204983	0.138692
				-0.411557	-0.248212		-0.563626	-0.314697	-0.32046	0.0403469	-0.230443	0.0739353	-0.147316	-0.308952	-0.207353	-0.128619	-0.15147	0.123854	-0.175157	-0.0877096	0.0172828	-0.00828421	-0.0881002	-0.0691008	-0.04143	-0.0450895	-0.0937037	-0.0629706	-0.586125	0.252961
				0.227793	-0.546495		-0.618771	-0.0131155	-0.216303	-0.290069	-0.0673723	-0.309545	0.0102618	0.0242006	-0.152939	-0.23982	-0.731971	-0.0207646	-1.07439	-0.172829	-0.354883	-0.24768	0.120057	0.304175	-0.390216	-0.0184969	-0.284759	-0.274728	-0.00293036	0.120311
					-0.237299		-0.89995	-0.123057	-0.352252	-0.165063	-0.159412	-0.209236	-0.178724	-0.0337508	-0.0362002	-0.155214	-0.0912165	-0.314452	-0.284999	-0.425626	-0.0269525	-0.418292	-0.20149	-0.0173002	-0.0972137	-0.113005	-0.0122743	-0.0890886	-0.328572	-0.119147
					-0.389661		-0.186877	-0.336572	-0.137586	-0.0979302	-0.033827	0.0124423		-0.127826	0.000828689	-0.26262	-0.409592	-0.225753	-0.107	-0.0221094	-0.18106	-0.365241	-0.406653	0.0126547	0.0216953		0.0345816		0.0267141	-0.15188
					-0.741859		-0.106442	-0.0963475	-0.00785136	-0.0964377	-0.153532	-1.01675		-0.189886	-0.38055	-0.147997	-0.0189177	0.0867375	-0.249595	-0.00302945	-0.109851	-0.108282	-0.138692	0.135928	-0.0707174		0.0488244		-0.0732866	-0.155967
					-0.218738		0.209341	-0.4182	-0.324159	-0.231197	-0.788309	-0.189928		-0.751455	-0.280981	-0.0724669	-0.209441	0.050816	-0.111499	-0.327063	-0.155479		-0.137072	-0.221814	-0.0513793		-0.227639		-0.184589	-0.0175901
							-1.1497	-0.0550186	-0.324298	-0.057899	-0.0301456	-0.299818		-0.0909948	-0.205272	0.058066	-0.131047	-0.0499478	-0.0760478	0.24268	0.0730009		-0.106377	-0.241588	-0.0408151		-0.134701		0.0641872	-0.173458
							-0.431393	-0.123066	-0.180783	-0.308914	-0.181771	0.0189383		-0.217691	-0.139883	-0.292677	-0.0727384	-0.306649	-0.226933	-0.0216714	-0.237187		-0.102788	-0.302983	-0.149305		-0.135911		-0.290373	-0.50429
							-0.608838	-1.32621	-0.476238	-0.256272	-0.0798852	-0.600253		-0.171077	-0.144087	-0.0655415	-0.0333967	0.00273558	-0.477576	0.0525161	-0.429567		-0.0835554	-0.168466	-0.0732514		-0.0789602		-0.0365056	0.0237627
							-0.930227	-0.260185	-0.14763	-0.178057	-0.348759			-0.160363	0.019946	-0.459585	-0.210853	-0.0214992	0.0360386	-0.0647688	-0.169523		-0.0558671	-0.931529	0.0415066		-0.150927		-0.117558	-0.000901909
							-0.603506	-0.251971	-0.111207	-0.184194	-0.184709			-0.0533893	0.000636415	-0.0490085	-0.0440923	-0.127148	-0.112863	-0.185325	0.0586614		-0.261994	-0.112471	-0.153375		0.053259		-0.406868	-0.020291
							-0.721387	-0.215916	-0.17961	-0.0183447	-0.181207			-0.0540907	-0.168012	-0.135102		-0.150871	-0.0407405	-0.0465449	-0.0956144		-0.029555	0.00847363	-0.0402651		0.0337424		-0.153298	0.113953
							-1.99021	0.0825452	-0.164612	-0.298845	-0.275425			0.0630011	-0.189032	-0.136534		-0.255858	0.10118	0.0342665	0.0959917		-0.0381727	-0.13347	0.266403		-0.171998		-0.0907467	0.258695
							-0.854384	-0.420604	0.0308412	-0.0687279	-0.259673			-0.278825	-0.345364	-0.115706		-0.198682	-0.248723	-0.290338	-0.0181882			-0.0551154	-0.0904486		-0.0965154		-0.0110194	-0.0640816
							-0.492807	-0.410776	-0.241393	-0.366981	-0.222947			0.00133016		-0.246152		-0.11316		-0.324678	-0.0115996			-0.165392	-0.0227065		-0.0701008		-0.133006	-0.0965619
							-0.406092	-0.0256355	-0.232074	-0.184364	-0.236236			-0.0318003		-0.190621		-0.183826		-0.0324427	-0.160332			-0.0528149	-0.14226		0.0204477		-0.444932	-0.134285
							-0.192436	-0.0928735	-0.108961	-0.145979	-0.165558			-0.179273		0.100437		-0.168385		-0.258656	-0.256743			0.0245817	-0.150596		-0.00801098		-0.140905	-0.203584
							-0.747701	-0.047103	-0.437203	-0.12586	-0.0381298					-0.0467249		-0.565732		-0.457348	-0.233271			0.34062	-0.113779		-0.217165		0.069947	-0.183596
							-0.447263		-0.0914412		-0.11911					-0.198938		-0.0760615		-0.150172	-0.225892			-0.0366769	-0.270054		0.0478079		-0.137572	0.0885691
							-0.075337				-0.165648					-0.131011		0.237321		-0.338308	-0.121416			-0.684242	-0.0624345		-0.225271		-0.00363036	-1.14504
							-0.316782				-0.0421915					-0.26961		-0.0677973		-0.0714446	-0.0183624			0.0172639	-0.147724		0.000215622		-0.0808491	0.18197
							-0.120686				-0.12876					0.132801		-0.811752		-0.291435	0.00344757			0.13378	-0.0574577		-0.233902		-0.180928	0.0335159
							-0.735432				-0.406743					-0.0916942		-0.253432		-0.263503	-0.0558354			-0.0812871	-0.132157		-0.0190006		-0.136102	-0.29715
							-0.163909				-0.209754					-0.231009		-0.12171		-0.179794	-0.0407109			-0.0231562	-0.267515		-0.216586		-0.292929	-0.185665
							-0.578035				0.105865					-0.203235		0.0453614		-0.0651012	0.0171476			-0.163124	-0.124098		-0.113586		-0.0174755	-0.307298
							-0.147919				-0.256173					0.00223134		-0.00586229		-0.0861149	-0.684662			-0.142039	-0.0660703		-0.136925		-0.0679341	-0.0554763
							-0.802515				-0.170609					-0.2493		0.028241		-0.0355137	-0.0683835			-0.517904	0.0905622		0.039648		-0.0618661
							-0.897125				0.059405					-0.277029		0.00299702		-0.0959246	-0.0749392			-0.0773298	-0.608972		-0.322426		0.146752
							-0.880209				-0.0236813					-0.131373		-0.0608049		0.022082	-0.141113			-0.0458798	-0.4472		-0.0784295		0.215783
							-0.55372				-0.342373					-0.0103786		0.0486268		-0.213968	-0.0958587			-0.188488	-0.203581		-0.180696		-0.0240484
							-0.09619				-0.177918					-0.138209		-0.0739486		-0.192202	-0.00392691			-0.221884	-0.476786		-0.205453		-0.255985
							-0.10431				-0.131011					-0.135897				-0.123401	-0.490235			-0.120578	-0.135952		-0.430561		-0.0631726
							-0.106312				-0.309023					-0.156493				0.0138627	-0.15424			-0.0825192	-0.156148		-0.107587		-0.115661
							-0.240603				0.00995001					-0.152169				0.0250941	-0.0586388			-0.193251	-0.16197		-0.0699462		-0.224286
							-0.169875				-0.109797					-0.119586				-0.415954	-0.0399575			-0.323586	-0.0875763				-0.0303489
							-0.319479									-0.132509				0.0517288	-0.0943571			-0.319504	-0.166941				-0.0525791
							-0.895754									-0.0523336				-1.35051	-0.213602			-0.186114	-0.10549				-0.1866
							-0.395511									-0.0550775				-0.0613882	-0.134472			0.267233	0.0441287				-0.0777882
							-0.0500769									-0.00599873				0.134468	-0.0580019			-0.728713	-0.323296				-0.0677644
							-0.510303									0.0256566				-0.0695623	-0.594779			0.00474735	0.0532585				-0.177451
																-0.0700139				-0.122971	-0.338586			0.373708	-0.0529064				-0.232091
																0.13188				0.233046	-0.0464285			-0.103779	-0.284717				0.0219961
																-0.24318				-0.072185	-0.143596			0.0353067	-0.195228				-0.118232
																-0.155343				-0.113669	-0.196237			0.0332564	-0.142896				0.0252842
																-0.212073				-0.22331	-0.231342			-0.108781	0.0656658				0.00913352
																-0.0514007				-0.596435	-0.126252			0.0634647	0.205375				0.0599827
																-0.13019				-0.186988	-0.567708			-0.00691911	-0.148199				-0.252791
																-0.158464				-0.0975688	-0.0297376			-0.168741	-0.00878649				-0.0457246
																-0.135686				-0.124767	-0.122547			-0.387374	-0.0948785				-0.0185565
																-0.0582255				-0.0699571	-0.0941663				-0.0030876
																-0.100343				-0.193079	-0.00856987				-0.156145
																-0.206776				-0.117227	-0.17098				-0.289712
																-0.192032				0.0633734	-0.416772				-0.0322969
																				-0.21	-0.57954				-0.189283
																				-0.242644	-1.05908				-0.198558
																				-0.0384176	-0.220495				-0.212842
																				0.0269413	-0.211555				0.0154452
																				-0.0798202	0.0118216				-0.0446624
																					-0.15819				-0.116099
																					-0.0891123				-0.00903644
																					-0.0659863
																					-0.0290393
																					0.0742632
																					-0.0249419
																					-0.296275
																					0.0790116
																					-0.121173
																					-0.106187
																					-0.0763781
																					-0.0671414
																					-0.198513
																					-0.604259
																					-0.171112
																					-0.0632739
																					0.0145265
																					-0.233603
																					-0.0723427
																					-0.0130884
																					-0.368104
																					-0.218594
																					-0.0717567
																					-0.140901
																					-0.0142522
																					-0.00434932
																					-0.287468

## Sheet: AML RNA exp. and ACSL4 dep.
Supplementary Table S1D: Gene expression data of AML cell lines
Cell line	r (Pearson)	THP1	MV411	MOLM13	OCIAML2	NB4	SKNO1	MOLM14	HEL	KASUMI1	NOMO1	SHI1	HEL9217	M07E	OCIAML3	MONOMAC1	TF1	AML193	P31FUJ	CMK115	U937	HDMYZ	SET2	OCIM2	MUTZ8
ACSL4 DepScore		-1.50549	-1.19961	-1.04638	-0.836262	-0.819748	-0.741859	-0.705048	-0.618005	-0.546495	-0.506968	-0.390337	-0.389661	-0.352696	-0.256977	-0.252442	-0.248212	-0.237299	-0.218996	-0.218738	-0.212193	-0.206208	-0.133174	-0.0812943	0.342143
ACSL4	0.121365	4.6427	4.32984	4.84348	4.78084	5.30342	5.26978	3.26003	5.95117	4.76713	3.6837	4.29793	6.17552	4.04876	3.30743	4.87971	5.21956	4.48736	5.57531	7.30478	5.24641	5.67582	6.61279	4.03738	4.18824
DPM1	0.0334161	5.92077	5.99254	6.51286	5.39849	6.58451	6.35085	4.40327	5.4545	6.22766	5.63314	5.95327	5.88484	5.98071	5.19613	5.96047	6.50541	6.35014	6.27817	6.30415	6.31596	6.69418	6.10664	7.2363	4.89191
SCYL3	-0.112581	2.51854	1.93357	1.84398	2.95606	2.10769	2.16993	1.59455	2.48027	2.44361	2.46467	2.38681	2.9279	2.1635	2.41954	2.38681	1.852	2.04963	2.70487	2.19219	2.37295	1.93734	2.30451	1.65535	1.88753
C1orf112	-0.158081	4.24869	3.25399	3.83289	4.02503	3.38405	4.49761	2.51602	3.92125	3.91743	3.26604	2.87184	5.29939	3.41549	3.07382	3.65421	3.81455	3.9364	3.88753	4.31832	4.32697	3.6565	4.08746	3.0635	2.67129
FGR	-0.0461275	2.98003	3.70377	2.3505	6.01814	1.1177	0.0703893	2.52607	0.887525	0.124328	5.10643	4.78607	0.201634	0.475085	2.27202	6.12019	0.201634	6.06867	4.37851	1.4489	3.9542	0.0285692	2.12102	0.0703893	3.15704
FUCA2	0.0976009	6.02215	5.07425	5.28725	4.89191	5.28614	5.43029	4.92932	3.94953	3.87381	5.4957	5.03782	4.15056	5.8485	4.76022	5.41549	5.91361	6.97384	6.32589	4.86196	5.76845	5.80503	5.43229	5.50716	5.06005
GCLC	0.314282	3.75061	2.22651	4.10434	5.41346	4.16189	4.45088	2.848	4.87725	4.69822	3.87086	3.8268	5.53107	4.77189	2.33342	4.08746	5.32085	5.19417	5.20711	4.58556	4.95931	3.31759	5.61471	4.64386	4.12019
NFYA	-0.0271351	5.21179	4.01167	4.27352	4.87431	4.28466	4.91217	2.26003	4.82985	5.62673	3.853	3.50716	5.02989	4.57531	4.02326	4.33414	5.31143	4.40871	4.62936	4.8674	5.34731	3.849	4.84699	4.99503	3.70044
NIPAL3	0.0800602	3.60999	2.44095	3.31759	3.71918	2.43829	2.65535	2.51854	4.5472	2.79286	3.31325	3.0072	4.41886	3.75168	2.42492	3.83188	2.854	3.38543	4.60763	2.95791	3.15866	3.82883	4.12763	2.0321	3.02857
LAS1L	-0.236881	6.20867	5.3906	5.86765	5.10811	6.3067	5.88557	4.7148	5.1127	5.99887	5.62527	4.82579	5.38163	6.00966	4.91552	5.71315	5.732	5.6241	5.85898	5.68706	6.59976	6.06242	5.87381	6.42911	3.4957
ANKIB1	-0.0560979	3.63691	2.15381	3.05832	3.91169	3.88655	4.16993	2.14078	3.38405	3.65878	4.3427	3.25852	3.66789	3.40054	3.41414	3.20163	3.26153	3.47508	3.74416	3.01792	3.6311	4.24945	4.66334	2.65076	1.83996
CYP51A1	0.0429617	4.98504	4.774	4.52982	4.80478	5.13668	6.08534	2.93734	3.3505	5.37851	6.80941	4.77979	4.46401	0.378512	4.8515	6.76381	5.26529	5.66959	5.84323	5.6279	5.43029	5.42962	5.88215	3.84599	4.17153
KRIT1	-0.155796	4.9644	3.96717	4.3067	4.95187	5.36457	5.28503	3.80426	4.87578	5.31325	5.88533	4.89627	5.28318	4.98003	4.04439	4.9241	4.70432	5.14405	5.2211	4.60526	5.11603	4.30159	5.62877	4.20398	2.9855
RAD52	-0.021118	2.86592	3.27501	3.27947	3.7761	4.26903	3.64616	3.50335	4.65249	3.81352	4.43896	2.68482	5.142	4.20006	3.52482	4.0027	3.45943	3.6565	4.06005	3.25701	3.24641	2.91073	5.42291	3.49697	1.92979
BAD	-0.0263221	4.95187	4.91982	4.05485	4.59216	4.51979	5.37504	3.5656	5.24982	4.92458	4.63459	3.7366	4.47703	4.61706	4.60288	4.40054	5.10518	5.81378	4.64674	3.67016	4.50716	5.66391	5.49697	3.03562	4.80787
LAP3	-0.0787962	6.16189	5.36842	5.64587	5.77742	6.77979	6.07339	2.61353	5.91576	6.05355	5.33914	5.16068	6.47233	5.68762	4.73931	5.40054	6.01659	5.94767	6.1918	5.99322	5.94603	5.78999	5.9331	5.46793	4.84499
CD99	0.0178811	7.62381	6.31506	6.5947	6.80051	6.8596	7.17862	6.52716	6.34394	7.27771	7.06124	7.17103	6.29462	6.43996	6.49586	7.42299	7.6351	5.71617	8.41621	7.2485	8.07569	8.77752	7.80361	3.18745	7.20809
MAD1L1	-0.31839	5.48543	6.10245	5.46074	5.84172	5.85873	4.34341	5.74335	5.28836	4.0365	4.62761	4.34341	4.39849	5.04527	7.20672	4.86047	6.02237	5.0648	4.32984	3.88655	7.86313	4.44095	5.10852	3.07895	3.59216
LASP1	0.189827	6.09529	5.71094	5.57319	5.97292	6.80864	5.2724	5.1334	5.48123	5.53605	6.56285	6.0751	5.12805	5.99186	6.82031	6.14241	6.08789	7.87049	7.05572	6.10014	6.13873	5.61912	6.85947	5.11936	5.82451
SNX11	-0.396902	4.27202	4.393	4.34908	4.29499	4.26228	3.80323	3.92884	3.89627	4	3.49697	3.67243	4.26529	3.99458	4.39506	4.22033	3.49697	5.2149	4.78764	3.19849	3.21878	3.36877	3.41007	2.87381	3.44228
M6PR	0.016891	6.75208	6.7305	7.2116	7.58646	6.82018	6.8802	6.61102	7.5131	7.40429	7.20261	6.67172	7.44319	7.14405	6.76673	7.11041	7.07596	8.18953	7.64897	7.53169	6.988	6.24584	7.19741	6.51791	6.51507
ICA1	0.116274	4.24336	2.33342	0.15056	1.14405	0.0840643	3.44758	1.4957	4.89191	5.749	4.13175	4.2502	3.56682	3.88655	2.24489	1.60407	3.49697	1.43829	0.555816	3.75382	4.51033	0.321928	4.24413	2.47249	3.68145
ALS2	0.331222	3.28836	2.82171	4.44095	3.57652	4.6241	4.08491	2.5435	5.26491	3.75168	2.91839	3.15381	4.70653	4.12184	2.5008	2.62527	3.93263	3.66107	3.68032	5.86419	3.32048	5.32912	5.11811	3.3147	6.23898
CASP10	0.243696	2.41684	2.10434	2.3505	3.03738	2.23879	2.46467	2.29278	2.90497	2.33342	2.65076	2.59694	3.51854	3.45943	2.95233	3.11936	4.12598	3.2765	3.42626	3.93263	2.02148	0.0976108	5.34127	2.62761	2.45154
CFLAR	0.208482	4.851	5.08831	4.29352	5.34021	6.04571	2.90497	3.49313	5.2555	3.94673	4.20242	4.75435	5.19219	5.65134	3.98459	5.48317	6.05159	6.46254	5.32876	5.89433	3.72137	6.22978	5.86542	6.60244	4.02148
TFPI	0.530746	0.687061	0.0703893	0.124328	0.111031	0.263034	3.75916	0	2.95606	2.08746	0.250962	2.9855	3.88557	4.03826	0.201634	0.201634	4.04527	3.22805	0.0976108	4.58316	0.0565835	7.79194	5.08534	6.283	4.6153
NDUFAF7	0.100814	3.24641	3.56194	3.83086	3.22033	4.19692	3.97177	3.74308	4.08151	3.59574	4.0036	3.63691	4.4957	3.74308	2.9241	3.82069	5.09592	4.44095	4.2426	3.05137	4.35826	4.05918	4.21568	3.96993	2.73985
RBM5	-0.144882	7.27165	6.774	6.63169	6.90063	6.36177	6.644	6.224	6.82515	7.07778	6.91397	6.19022	6.57501	7.23333	6.62921	7.28225	6.32067	7.83857	7.44758	5.36352	7.13843	5.96209	7.92345	5.14853	6.33056
ARF5	0.233786	6.09908	6.39215	5.93168	6.41903	7.59119	5.62585	5.67073	6.1916	6.26679	6.14547	5.61029	6.08513	6.79246	7.30104	6.53807	6.62308	7.33789	7.07682	6.32984	6.72792	7.00034	5.37539	7.37173	6.21296
POLDIP2	-0.0288426	5.6153	5.47897	5.34908	5.22805	6.27761	4.94392	4.36036	5.97957	5.42156	5.71232	4.90352	5.849	5.89506	5.25965	5.4266	5.79051	5.97108	6.06824	5.615	5.75702	5.41853	5.90352	5.79831	4.40259
PLXND1	-0.0253013	6.88923	6.55903	5.61736	5.86567	6.90014	6.74752	6.2292	6.18011	7.15411	7.43137	7.23304	6.48285	4.72301	4.32481	7.43646	5.58676	7.16289	5.26191	5.39746	7.55766	4.91791	7.86845	6.83302	6.83289
AK2	-0.176809	8.59995	7.62198	8.20163	8.61912	8.34829	7.94181	7.34864	8.57118	7.32903	9.50311	7.58594	8.70712	7.78555	8.85543	8.88264	7.90677	8.27347	8.90977	7.87719	9.26569	8.08815	7.70743	7.53177	6.65793
CD38	-0.0585018	4.75916	0.9855	1.99277	4.99095	4.31034	3.84398	0.263034	0.0143553	1.91456	3.23266	0.0285692	0.0285692	3.13914	3.06523	3.79494	3.15704	2.49057	4.58316	0.807355	2.1177	0.0426443	5.51538	0.0426443	4.1152
FKBP4	0.123925	4.84147	6.55643	5.6792	5.51349	6.46777	7.56872	3.5008	6.51112	7.83687	6.29829	4.49121	7.28882	6.03562	5.7126	5.22651	7.19604	7.01625	6.59335	5.6094	6.00944	5.99526	6.68552	7.03969	5.13381
KDM1A	0.0869179	5.988	5.3799	5.51633	5.64559	6.30925	6.81224	3.84499	6.78581	6.69084	5.68622	5.10182	7.40489	6.90123	5.05918	5.36807	6.59723	5.33163	5.86096	6.52857	6.39934	6.80323	6.84587	6.22226	5.02326
RBM6	-0.458251	6.22323	6.58886	6.09508	6.93723	6.38007	6.72751	5.62234	5.82782	6.45121	5.9991	5.76553	6.17991	6.07039	5.42223	5.9404	5.71039	6.6094	5.90231	5.38578	6.55551	5.49089	6.70722	5.29902	5.35509
RECQL	-0.0369787	4.45088	3.7761	4.53169	4.80116	5.75355	5.31034	2.67129	5.30889	4.854	4.32769	4.76075	6.27184	4.87283	3.75489	4.60526	4.21101	4.38267	5.59126	5.12763	4.78973	5.72438	5.24831	2.41684	3.68594
VPS50	0.151036	3.2032	1.95233	2.44361	2.91648	3.04963	2.94298	2.0036	3.34056	2.7761	3.40327	2.80941	4.39985	3.51475	1.76553	2.71149	3.53232	3.47249	3.57773	2.32193	2.98185	3.56803	4.76924	3.76447	1.66903
ARHGAP33	-0.176687	4.71644	4.59395	4.44692	5.68762	2.64847	4.49761	2.88362	4.43229	3.26454	4.3505	2.20789	2.52607	4.02857	3.55459	4.77821	5.8268	5.63604	5.61618	1	4.99367	3.48929	4.55888	4.10685	2.54844
NDUFAB1	-0.0268546	7.47371	7.8182	7.63517	6.86851	7.74342	7.21383	6.15157	6.65406	6.42004	7.11811	6.80645	7.35173	7.32184	6.70099	7.30807	8.27696	7.93558	7.43095	7.02934	8.06776	7.83378	7.48896	7.74725	6.56209
SLC22A16	-0.551184	5.76049	3.02857	3.74524	4.30961	4.32121	2.42761	4.43962	0	4.75007	2.16993	2.94486	0	0	0.903038	4.17951	0	5.49025	2.37016	0	3.30743	0.0143553	0.765535	0.0565835	0.956057
SLC25A13	-0.052373	3.99095	3.41414	4.05918	3.98459	4.91504	3.84599	2.91456	4.05918	4.37086	5.77663	4.48929	4.46205	4.56925	3.31179	4.14323	5.18824	4.78241	5.87504	4.39575	3.9514	4.30961	2.95047	4.62761	1.86394
ST7	0.131308	4.04789	2.926	4.0036	3.73444	3.88069	4.38543	3.2032	4.12681	4.12598	3.63923	2.65764	4.58676	4.96486	2.6893	3.88264	5.00988	1.83592	3.0321	4.7301	3.21723	3.80941	4.30305	5.75221	4.2502
CDC27	0.0647341	5.44758	4.34554	4.41616	5.26115	5.15583	5.55612	3.18903	5.73525	4.99005	4.37086	4.7137	6.67002	5.77979	4.1235	4.35403	5.98185	5.55612	4.85549	5.31651	4.57713	5.3844	6.44178	4.88411	4.24184
HCCS	-0.0815884	4.78869	4.14649	4.0505	4.00899	4.50526	4.6893	2.09424	4.44162	3.57289	4.30816	3.55582	4.43363	4.63459	4.06781	3.80323	4.70984	4.77347	4.54782	4.29205	4.62117	4.10182	4.49506	5.19101	2.73335
DVL2	0.183576	4.04002	3.98368	4.28983	4.48091	4.1914	3.7866	2.75061	4.46336	3.77505	4.50843	3.0036	4.85499	5.19338	4.88313	4.2817	4.56499	3.94953	4.84449	4.15866	4.44162	5.2211	5.78136	4.03914	3.38957
UPF1	-0.162334	5.36562	5.48929	5.25399	4.77189	5.53201	5.41886	3.88264	5.14731	5.11603	4.98413	4.70543	5.43796	5.47411	4.56986	4.86146	5.95652	5.55121	5.87873	4.79961	5.19338	5.18745	5.40803	5.0054	4.30597
SKAP2	-0.079103	5.01837	4.1635	3.9644	4.27128	3.95791	4.27053	1.57531	3.91265	3.83794	4.39643	4.87823	4.28836	3.85699	3.66221	4.55949	3.07724	4.0365	4.80116	4.26903	4.79805	4.5601	4.43296	2.98185	3.85898
SLC25A5	-0.11829	8.35698	8.71407	8.62516	9.55034	9.5513	9.19734	6.32805	8.38642	9.13643	8.79552	8.56419	8.44927	8.76954	8.62315	8.52262	9.0175	8.59376	8.88393	8.88441	9.8051	9.16626	7.78516	8.37173	7.42995
MCUB	0.203456	0.85599	1.38957	2.97636	3.25248	0.879706	3.43296	2.25096	2.852	4.27426	3.48027	2.73335	3.46467	3.07039	3.19061	4.06781	1.7137	3.54226	3.09085	2.38681	2.70708	4.44626	3.30305	2.49313	0.31034
POLR2J	-0.235134	6.82833	6.42559	6.02436	5.62877	7.33727	6.53201	6.90509	5.91433	6.07703	5.28503	5.03474	5.9148	6.18527	6.57319	6.09128	6.13011	7.18507	7.37912	6.43663	6.20828	6.54179	5.2854	6.72315	5.1334
DHX33	-0.172988	3.21878	3.22805	3.8339	4.13832	4.10098	3.79494	2.79494	4.13668	3.76341	3.86493	2.06005	4.52482	4.50843	3.36877	3.03914	4.7148	3.1811	4.32193	2.91839	3.69822	3.926	4.29205	3.5097	1.35614
LIG3	-0.240757	4.65821	3.67243	4.38267	4.82171	4.87135	3.26454	2.63459	5.29572	4.09339	4.14323	3.37295	5.4822	4.58316	3.79805	3.9486	4.32265	4.77505	5.16832	4.15623	3.90304	4.04264	4.40122	3.09085	2.4489
RPAP3	-0.0285955	5.67723	3.36457	4.19613	4.27947	5.27426	4.82018	3.90207	5.66278	4.3512	4.09424	4.47508	6.02303	4.30889	2.84398	4.06953	6.74483	4.74201	4.61941	5.10769	4.19061	4.51223	4.70929	4.80323	4.20711
ACSM3	0.346463	1.87971	4.86938	2.31034	3.51096	0.831877	3.23266	2.63923	5.48349	1.18903	2.34767	2.7845	7.26622	4.90929	0.731183	3.16672	5.36422	2.72465	1.08406	5.24375	3.56925	2.1177	5.99842	6.13607	6.42122
REXO5	0.0269352	4.1811	4.07125	4.30816	4.68145	3.63459	3.12928	3.78869	3.42492	4.07039	3.32193	3.79909	3.4489	4.26003	3.40463	4.45088	4.0917	3.10936	5.20945	3.67243	4.03914	4.13504	4.30232	3.30159	4.53605
CIAPIN1	-0.0167713	5.77584	5.17552	5.16591	5.03782	5.98162	6.1127	3.85699	5.45976	5.73904	5.21839	4.9528	6.18567	5.67384	4.89869	5.38059	6.15381	5.36387	5.68285	5.87873	5.6792	5.84273	5.88387	5.13668	4.63865
SPPL2B	-0.44276	6.39695	6.32841	5.93546	5.3302	4.9905	4.93168	4.38543	5.03782	5.46663	5.88044	4.59634	3.99458	5.779	4.5552	6.35966	5.5097	5.97682	6.71548	3.28096	6.05072	5.18666	4.95513	3.72465	3.32337
FAM214B	0.377549	3.34908	2.62994	2.31615	2.98732	1.93734	2.23573	2.62059	3.63807	2.06005	3.09592	2.18269	2.854	3.17313	3.06695	2.72465	3.13422	4.09339	3.488	3.63227	2.38681	3.9782	3.87676	2.27202	3.99548
PRKAR2B	0.277843	3.49442	1.4957	2.23879	3.92315	0.333424	3.18269	2.16672	4.41346	0.495695	2.84599	1.35614	5.74308	5.84825	3.09424	3.08916	3.48543	2.30451	4.9855	3.08916	2.49825	2.51854	4.28762	5.32193	3.04963
MSL3	-0.0320212	4.15623	4.05224	4.06781	4.67638	4.12267	4.41886	4.23496	3.45681	4.04614	4.77083	3.3799	3.93263	4.25927	3.36177	4.55152	4.02503	4.51538	4.18587	3.31759	4.65134	3.72792	5.57077	5.23764	3.25096
CREBBP	0.0109602	4.07039	2.65764	3.07895	4.40599	3.62761	2.86196	2.774	4.16027	3.0197	4.06867	2.85798	4.27426	3.97361	4.33771	3.99095	4.12598	3.8339	4.26679	3.52105	3.09592	3.34908	4.67976	2.33056	2.69153
TSPOAP1	-0.118002	5.20163	4.05832	7.06415	4.71039	4.57471	4.64559	5.39403	1.53605	7.54288	7.29471	3.97728	1.58496	2.8339	2.0635	7.38724	4.1177	10.3627	8.99053	0.687061	0.748461	0	3.94111	1.82375	6.24527
MPO	-0.145784	2.83794	2.38128	6.83782	3.5008	12.8965	10.773	2.12763	0.137504	13.02	9.65293	5.6094	0.0285692	1.70487	0.389567	5.0045	0.765535	5.75409	3.9364	0.0976108	0.367371	0	0.137504	0	10.3554
GCFC2	-0.112537	3.47249	2.62994	3.1177	3.68482	3.99458	3.89821	3.72574	3.67807	3.84699	3.10601	3.25701	4.3875	2.25399	2.11437	3.05137	3.88655	2.9542	3.29572	3.51854	2.29866	3.71039	3.59096	3.90304	3
WDR54	-0.0902691	4.42761	5.08916	3.27501	5.31252	4.43296	4.90207	3.93357	4.27202	4.25323	4.41819	3.01078	4.93499	3.9486	5.59723	4.91982	2.93923	5.41075	5.55121	4.17632	4.65821	6.82807	3.28983	2.15704	3.79701
KMT2E	0.142212	4.33842	3.33914	3.15866	4.29352	4.51096	4.42828	2.63923	4.01078	4.53481	2.75275	2.80116	4.37712	4.52419	4.39094	4.34412	3.92125	4.14812	5.4363	4.25776	4.21568	5.1534	4.4019	3.42492	3.43696
RHBDD2	-0.00879786	3.94673	3.80426	4.5552	4.28836	4.81455	4.65421	5.60733	4.08661	3.81558	5.35191	4.90977	3.28836	4.54102	4.54844	4.50462	3.82375	4.15137	5.50716	3.70044	4.28392	4.7866	4.04352	4.16108	4.08321
IBTK	-0.0901794	4.37782	3.73769	4.27798	4.62702	4.17632	3.97911	4.26754	4.26003	4.47573	3.68145	3.98094	5.0054	4.4614	2.79494	3.9514	4.98231	4.04177	4.24869	3.92315	3.80219	4.69822	4.66221	5.18666	3.1811
ZNF195	-0.235557	4.91934	4.37086	3.8125	4.54659	3.96625	3.56925	4.66221	4.45286	4.55888	4.45943	3.83693	4.76765	4.8475	3.28836	3.9991	4.21335	4.26754	4.39917	4.25475	4.15785	3.24031	4.7021	4.21412	4.02768
MYCBP2	0.0483601	5.76818	4.32121	5.22419	5.50811	6.12722	5.46663	3.16832	5.90063	4.96993	6.1102	4.10518	6.07339	5.48736	5.2149	5.88557	5.72247	6.14731	7.39985	5.72819	6.38647	5.07211	6.3505	3.57652	4.34483
FBXL3	0.306087	4.12763	3.28096	4.22728	3.9364	3.93168	3.90014	3.3505	4.06437	4.02591	3.02148	3.63923	4.7366	3.66562	3.65535	4.66505	4.9331	4.51538	5.42459	4.81916	3.75702	3.92029	4.74147	3.26604	4.44228
ITGAL	-0.377159	7.29251	8.98749	8.17198	8.18369	1.69599	1.04264	7.70833	1.51096	0.687061	7.7077	3.67469	2.73118	2.43829	7.21354	8.02381	0.632268	6.57471	6.72751	0.970854	4.45681	0.163499	4.7252	0.163499	3.95699
PDK2	0.300323	3.77821	3.19692	2.86987	2.93923	0.111031	3.17792	2.26604	3.83996	3.56316	3.73877	2.81147	3.13586	4.03122	2.82782	3.55949	4.25927	4.99141	4.54597	4.07296	2.76341	3.03562	3.9607	3.23419	3.65535
ZFX	-0.0354545	3.04789	2.60407	2.42761	2.89724	2.95606	3.15543	2.28983	2.56803	3.26303	3.16672	2.10434	3.05658	3.66221	2.20789	3.03738	2.81762	2.43563	3.31904	1.69599	3.1177	2.0321	4.03914	2.96162	2.40327
LAMP2	0.0302788	6.8535	5.35191	5.68762	6.25058	5.72846	5.62673	3.69265	4.18269	5.57924	6.00315	5.58767	4.70377	5.92552	5.4353	6.61029	5.81788	5.94369	6.66888	5.60674	7.27631	6.13873	5.70791	4.74631	5.8475
ITGA2B	0.280922	0.9855	3.04614	0.176323	3.38957	2.17632	3.4957	0.163499	9.33535	1.07724	1.96347	0.910733	8.4665	7.33557	0.748461	0.475085	7.90575	1.23266	0.807355	8.77656	0.214125	0.250962	9.20195	5.69738	5.55336
GDE1	0.210491	5.31179	4.21568	4.37643	5.04133	4.67469	4.42021	4.05485	4.29939	4.75061	4.52231	4.37434	4.71094	5.02768	3.62059	4.70819	5.15218	4.91982	5.80064	4.90159	4.97636	4.94345	5.38785	4.40395	5.11187
REX1BD	-0.460504	5.9855	7.18933	6.44559	5.61824	4.81352	5.17513	4.77505	5.6372	4.92362	5.65105	4.24793	4.76075	5.28059	5.44692	5.7021	6.20594	5.18824	6.88533	2.8339	5.57501	5.76447	5.62673	3.93546	3.59813
CRLF1	-0.347367	2.31615	3.4957	2.65076	1.93357	2.95606	2.42492	1.73552	2.88557	2.54597	2.67129	1.46989	2.65076	2.47249	1.81147	1.91456	3.81558	2.53107	2.91265	1.31034	1.96347	1.4489	3.0036	2.24793	1.07039
OSBPL7	-0.235969	3.62059	3.30012	3.36877	3.56316	2.89724	4.10601	2.19849	3.70708	3.90111	3.5472	2.926	2.62761	3.32625	2.28096	3.59096	3.40054	4.93923	4.54226	1.95977	3.51728	1.82782	3.8166	2.17951	2.14405
AP2B1	0.236368	5.30561	4.71644	5.11603	5.11853	5.80297	5.21023	3.76765	6.61088	5.95652	4.93121	5.15178	7.09656	6.48301	5.24031	5.07339	6.45204	6.04876	6.10014	5.8775	5.35226	6.66718	7.0398	4.765	4.68874
ZNF263	-0.103385	5.30634	4.44626	4.48736	4.58316	4.72955	3.99005	3.91456	4.77241	4.03826	4.00988	4.79286	4.59455	4.72901	4.89869	4.61117	4.72574	5.06867	5.17153	4.87332	4.46597	4.61353	4.63052	4.30743	4.05485
SPATA20	-0.294415	4.82426	4.66619	3.98003	3.89045	2.37295	3.43162	4.24793	4.93168	4.50779	5.22805	5.36247	3.90881	3.59335	4.33056	3.46205	4.1177	4.13832	5.83845	2.8679	4.19849	4.73769	4.98368	3.1127	0.863938
TNFRSF12A	0.433195	1.81147	2.06005	1.96717	1.1635	2.93357	1.65076	1.89142	2.21723	1.69599	2.73769	3.67016	1.60407	3.46858	1.94111	2.67129	3.94953	4.46923	4.02414	3.00899	2.89142	7.85823	3.93923	3.854	2.05658
RALA	0.383637	3.94017	3.74093	4.04789	4.06867	5.17672	4.66221	4.21101	4.33985	4.14486	4.58736	4.6241	4.73715	4.7241	3.87873	4.48671	4.61058	4.55336	5.77321	4.50271	4.73281	4.60585	4.07296	4.39232	4.49249
AGK	0.225843	4.32193	3.51475	4.38336	2.66221	3.63807	3.99639	3.58135	4.96209	4.52231	3.42626	3.75916	5.02857	5.22843	3.78555	3.87381	5.4941	4.37365	5.48993	4.77768	3.40871	5.01614	4.44162	5.75649	3.11437
ALDH3B1	-0.322133	5.19771	4.37504	4.21257	6.18388	3.21257	2.32193	4.65992	2.32481	3.70819	5.25626	4.46728	0.9855	1.69599	5.26153	5.91719	0.83996	4.83693	4.63343	0.823749	5.70901	2.58976	4.35191	0.903038	2.0036
PHTF2	-0.0382552	2.81762	2.62527	3.21878	3.80632	3.11936	3.77926	2.17632	2.28688	3.61941	3.63691	3.43563	3.0635	3.87873	2.45681	3.36597	3.04614	2.81762	4.04089	2.53854	2.91073	4.1127	3.12928	2.93734	2.08066
FARP2	-0.220981	3.93452	2.91265	2.58976	2.86196	3.95977	3.21101	1.14405	3.91073	3.29572	3.43962	1.08406	4.42694	2.80323	2.76765	2.70266	4.20945	2.71149	2.22651	3.18269	1.61824	3.61353	4.32697	2.7137	1.48027
GGCT	-0.410505	6.46891	6.54319	6.64024	7.18577	7.45968	6.76102	7.01748	6.28021	6.83415	6.36475	6.52121	6.86047	6.44857	5.56803	6.32948	6.2502	7.0568	6.18706	6.05788	7.28272	5.39575	6.0119	6.35032	5.91982
DBF4	-0.0149645	4.80581	4.36177	4.29646	4.61883	5.43196	5.28983	3.78241	4.39506	4.98368	5.1035	4.96901	5.79961	4.75007	3.36457	4.67751	5.46336	5.54751	5.70432	4.59813	4.84046	4.46597	4.68874	4.87086	3.76871
IFRD1	0.0418492	5.02414	3.71149	3.8846	4.64155	5.27202	5.02192	5.15259	4.97636	5.0387	3.05311	4.32697	5.30925	4.66619	4.53978	4.65878	4.41684	5.1035	7.11166	3.91169	4.99774	4.55336	3.63691	5.67129	3.9279
COX10	-0.125151	2.78869	3.37851	3.45812	3.83895	3.95791	3.14893	2.7866	3.56316	2.61824	3.20477	1.96717	4.11686	3.76765	3.15704	2.60644	3.76235	2.86196	3.81762	3.30305	3.28688	3.25248	3.68818	3.27202	2.28096
GTF2IRD1	-0.230352	3.15218	3.73227	0.238787	4.04089	3.70044	3.81558	1.09085	2.38957	3.72028	3.47768	2.9855	3.16832	4.59216	3.1811	0.31034	2.85997	2.73552	0.0703893	2.62293	2.12763	5.00899	2.93734	2.07039	0.422233
PAF1	-0.0360485	5.53169	6.03188	5.4957	5.30159	4.94345	5.44228	4.13258	5.73525	4.90014	4.8802	4.0505	5.39369	5.37747	5.5549	4.848	5.69822	5.69988	6.05224	4.96578	5.13914	5.55397	6.03826	6.05224	4.849
VPS41	0.113984	4.57652	3.38957	3.74846	4.58256	4.08066	4.45352	2.86196	4.35262	4.22188	4.18824	3.96532	4.36877	4.86691	4.1811	4.41007	4.13914	4.64328	5.12681	3.78136	4.49761	4.07296	5.89724	3.52732	3.44228
ELAC2	-0.0906017	4.64155	5.43596	5.4941	5.38094	6.36982	5.20046	4.41143	5.49857	4.79857	5.53916	3.77821	5.78398	5.8107	4.69042	4.06523	6.15117	4.90689	5.65134	5.43296	5.39472	5.17193	5.97384	5.774	3.97911
ARSD	-0.372099	4.59991	3.14078	3.26153	3.55949	1.5656	1.56071	3.11103	0.400538	3.52982	4.57168	3.15866	1.82375	0.0565835	3.22033	4.61235	1.1635	0.263034	4.53854	2.66676	3.32048	2.38405	3.33056	0	0
PNPLA4	0.0318466	3.29425	1.37295	2.38128	0.0426443	3.29719	3.68257	1.95606	3.32048	2.852	4.24641	3.01436	3.12267	0.0143553	2.73769	3.06695	0.536053	3.96717	3.28836	3.37434	0.0285692	2.66221	4.54226	0	3.38267
ADIPOR2	-0.070508	4.88166	5.2032	5.57864	5.47897	5.75515	5.30561	4.28688	5.91648	5.37573	5.39129	4.96717	6.34021	5.22149	5.69794	5.86617	5.15583	6.02901	6.08406	5.46793	4.78346	4.70929	5.79883	4.61824	4.22497
PRSS21	0.0436871	0.176323	0.0565835	0	5.9241	5.28281	6.28744	0	6.80168	6.65678	6.14527	0	6.40769	6.42038	0.0703893	0.0426443	6.14119	0.344828	0.0565835	5.61324	0	0	5.66249	6.64631	0
MARK4	0.321194	4.1102	3.38819	2.81558	3.67582	2.92029	3.21878	2.90881	4.43896	2.87184	3.23879	2.13422	4.02237	3.94111	4.19849	3.04614	4.37295	3.6017	4.64097	4.23343	3.58496	4.14568	4.51728	4.5509	3.76447
CCDC124	-0.262344	6.32373	7.6575	7.44832	5.81737	7.38128	7.25626	5.72465	6.89591	6.58961	6.54659	5.79572	6.76487	6.74537	5.80864	6.29609	7.1819	7.87006	7.09466	5.91433	6.86938	7.75455	6.77808	6.75489	4.7761
PAFAH1B1	0.114567	4.69766	4.90111	4.6241	5.37886	4.72301	4.48156	4.9222	5.02326	4.58496	5.22188	4.07468	5.75087	5.30706	5.30451	4.30012	5.56803	4.37851	5.72738	4.45154	4.76182	5.46761	5.62761	4.41549	4.73444
KIAA0100	-0.306815	6.67384	5.78084	5.64731	6.40173	6.58241	5.23764	3.76022	6.39643	6.46009	6.03056	4.91121	6.54288	5.86096	5.02945	6.02746	6.37191	6.95965	6.37173	5.5738	5.63198	4.90448	6.03386	4.44095	4.32841
GAS7	-0.0547937	2.87184	2.02503	3.30743	2.23266	3.22805	0.0426443	3.42761	0.137504	0.847997	4.98185	3.40735	0	0.226509	5.81583	3.88557	0.124328	3.37156	5.62176	0.0143553	4.97911	0.124328	0.333424	0.0426443	2.57773
TRAPPC6A	0.216518	5.86295	6.55857	5.19417	4.09424	4.22188	5.94275	5.17871	6.43796	5.83289	6.47265	5.48156	4.95745	5.70293	5.49121	6.69919	4.58075	5.8296	7.32021	6.43162	6.58466	3.89724	5.85922	5.92172	6.8653
MATK	-0.0290721	3.20477	5.82883	5.90809	0.0565835	5.20006	4.80374	4.49889	3.79701	5.8107	5.92552	3.74308	3.88753	6.01502	1.62293	3.95233	6.63329	6.083	6.47978	5.73606	0	0.250962	4.19298	3.43829	5.09381
CD79B	-0.191542	2.32193	1.36737	0.0565835	2.0072	3.86394	5.85947	0.604071	3.70929	3.45812	3.23726	1.76129	3.95699	1.26903	0.495695	1.44361	1.31615	0.226509	0.250962	4.27277	0.713696	0.137504	4.54535	0	0.847997
ST7L	0.231526	4.41278	2.73552	3.34767	3.09085	3.05137	3.65191	2.43563	4.49185	3.90977	2.94486	3.28244	4.39849	3.81865	3.63575	3.71809	3.66789	4.18349	4.50335	3.50589	4.78398	5.27128	3.53605	3.56803	3.40463
RPUSD1	-0.333743	5.08916	5.17832	4.5472	4.39438	4.58256	4.07724	3.27053	4.32984	3.34767	4.43296	2.79701	4.12928	4.90545	4.62527	4.47962	5.21994	4.90352	4.81301	3.34767	4.32553	4.1177	4.05918	4.12102	3.40327
LUC7L	0.109999	4.9905	5.82909	5.42895	5.69683	5.07125	4.97039	6.17532	5.22574	4.53045	6.09043	5.0036	5.63604	5.78607	5.06264	5.64616	5.55059	5.74873	5.76977	4.79753	5.20867	4.73444	6.71452	5.73173	5.39985
TSR3	-0.0596188	5.0505	5.07039	4.50906	4.74739	5.06867	4.10434	3.32625	4.6011	4.05658	5.03298	3.60407	4.46858	5.15583	4.93357	4.66164	5.09339	5.82375	5.15259	3.87873	4.78712	5.74819	5.22304	4.30086	3.73335
PIGQ	-0.002272	4.75061	4.90785	4.08661	4.27575	3.53481	2.59932	3.65076	4.1235	3.21257	3.90977	3.60051	3.32481	5.24527	3.44758	4.23189	4.74631	4.80529	4.54659	2.80529	3.74953	4.79233	6.27687	3.65306	3.91839
CRAMP1	-0.248259	4.18745	3.65764	3.48414	3.29866	3.03562	3.30012	2.30451	3.81455	3.56194	3.66107	2.73118	3.42089	4.10182	3.29278	3.60051	3.78241	3.62994	4.01703	2.41414	3.45154	3.63227	4.17792	2.26903	2.64386
DNAJC11	-0.122077	5.63981	4.88509	5.01569	3.90207	5.61353	5.8775	3.66448	6.27202	5.59694	4.9397	4.14405	6.46287	5.61559	4.43962	5.26679	6.30378	5.14364	4.40122	5.37121	5.86196	5.3067	6.33557	4.62585	3.30012
MYLIP	0.0168144	3.14893	4.28392	4.53978	4.19219	4.08746	4.12184	2.67129	3.81455	4.08151	5.20124	3.76129	3.38267	3.1375	5.69877	4.852	4.41616	4.07468	4.72683	2.93357	4.30743	0.31034	4.7252	4.48929	3.64386
E2F2	-0.128752	2.69153	2.36737	2.43563	3.10601	3.01792	2.73118	2.04264	3.27798	2.67356	2.69153	2.21101	3.93923	2.22033	1.60407	2.94673	2.68706	3.26153	3.54226	2.91456	2.4489	1.51602	3.0054	1.79909	2.07382
PSMB1	-0.0241469	8.46679	8.12619	8.75495	7.52301	8.68891	7.604	8.2255	8.11873	7.66924	8.00248	7.79338	8.56339	8.02348	7.86999	7.97785	8.7139	8.96313	7.99661	8.44812	8.48752	8.33405	8.3328	9.12363	7.55136
JARID2	0.284555	3.47249	3.69599	4.48285	4.15299	5.09381	4.16269	3.15704	4.1375	4.52544	5.50938	3.32337	4.45154	5.23764	4.9982	5.04352	5.39575	5.90641	4.99277	4.37712	4.28318	3.33628	5.53169	4.0993	3.75916
CDK11A	-0.111758	5.64212	5.66846	5.18507	4.21801	5.37365	5.63459	5.1416	6.48236	5.11894	5.40973	4.07895	5.62585	5.35262	4.29425	5.48864	6.73281	5.79857	5.44328	5.1206	5.55336	5.5552	7.25125	5.25172	3.58496
NADK	0.020569	6.08194	5.9331	5.67807	4.91073	5.88704	5.86394	4.0781	6.50637	6.031	6.21762	5.06134	6.22766	6.09803	5.53419	6.23228	6.39883	6.46222	5.86121	5.1639	6.22304	5.86962	6.32193	5.51317	5.18745
CYTH3	-0.0879097	3.33914	2.10434	1.65992	3.11437	3.65191	2.72247	0.659925	1.25096	3.49185	2.80116	1.56071	1.43829	2.61589	2.69377	3.2032	2.71809	1.14405	2.70487	1.1635	4.28244	3.90497	2.8679	3.14078	0.933573
SYPL1	0.174743	6.25531	4.96671	6.12681	6.07959	6.7654	6.98425	3.46989	5.71864	6.47476	4.24413	4.765	6.14771	5.75836	5.57561	6.32048	5.9991	6.93286	7.83371	6.34855	6.34837	6.16471	5.21994	5.44725	6.91145
CYB561	-0.118206	2.86987	3.20477	2.94111	2.56803	1.53107	4.80374	1.33342	4.63575	4.47379	2.57773	2.28096	4.16189	2.81558	2.23879	2.34767	5.47735	3.84599	3.9279	1.93357	0.0840643	4.10014	1.68257	3.10769	1.48027
SPAG9	-0.0735865	5.43363	3.26454	4.04264	5.01525	4.41752	4.24717	2.91456	4.45549	5.44824	4.73064	4.17153	4.71918	4.33056	3.85499	5.04396	4.19456	4.93216	4.96209	3.70377	4.70929	6.35826	4.52544	3.38819	3.31615
SS18L2	-0.00106006	5.09719	5.38681	5.10014	4.9397	5.19219	5.66534	5.13052	5.17153	5.08321	4.79129	5.17632	5.81275	4.83592	4.56803	5.21878	5.17473	6.60703	4.97085	5.29094	5.3302	4.25626	5.14078	5.59126	5.04571
MPND	0.200918	3.73877	2.5509	3.94486	0.941106	2.58976	2.05658	3.83693	3.30889	3.58256	3.79701	3.03386	3.14241	4.03914	3.30743	3.39369	2.86394	4.20477	4.70819	3.58015	3.60407	3.59216	2.45418	3.18745	3.32193
MGST1	-0.175455	7.39643	6.2211	7.31288	7.66832	6.87184	8.55455	7.39592	7.51349	7.56156	7.72048	7.95699	8.37877	3.87873	7.23103	8.59257	6.57849	2.29866	4.82883	6.54551	7.51128	4.48349	8.03551	5.83466	7.75529
CRY1	0.239624	2.5435	2.04264	2.38681	2.26604	3.66334	2.76341	1.51602	3.35755	3.70929	1.95977	3.12763	4.39575	2.93357	1.9222	2.73118	3.05137	3.43029	3.94486	3.11936	3.37573	3.62176	3.13258	3.0054	2.02148
NFIX	0.159839	3.27501	1.63691	0.799087	2.7761	2.25399	4.43829	0.238787	3.30451	3.84599	2.46205	1.94486	4.0505	4.48285	3.52231	2.32769	5.31216	3.62293	3.60644	2.78241	3.20163	4.46923	5.25323	1.0072	0.879706
ST3GAL1	0.0052834	4.14649	3.34908	4.33056	3.97728	3.05658	4.07553	3.0993	4.65306	4.90593	3.32769	2.82985	3.81865	5.98527	5.83794	4.0045	4.07553	5.12805	4.51033	2.44095	4.29646	3.51475	3.74201	3.86096	2.99277
IL32	-0.00435372	1.62761	1	1.32769	1.95977	1.24489	0.632268	1.51602	0.83996	1.3505	1.28688	4.26454	0.970854	1.23266	1.89142	1.36177	0.485427	1.28096	1.52607	0.495695	8.89821	0.226509	0.678072	0	0.189034
PKD1	-0.370302	5.99345	5.46009	5.78947	4.83441	5.67948	4.29278	5.04002	5.37191	4.38267	5.00315	3.99367	4.38336	6.15218	6.53543	5.41988	5.29719	5.26566	6.2724	2.82985	5.31143	5.67779	6.0148	2.96901	2.45681
MED24	-0.0771251	6.06048	5.72928	5.6585	5.32769	6.31488	6.24222	4.70377	6.3651	5.70016	5.95838	5.0917	5.90977	6.12184	5.19613	5.94392	5.97039	6.97522	6.06501	5.77162	5.65392	5.13463	6.84524	5.59156	5.02414
RHOBTB2	-0.194193	4.01257	3.85699	3.44493	3.99277	2.65992	0.956057	3.10098	2.37295	1.01436	4.0365	2.79286	2.88557	2.488	3.80941	5.08746	2.68032	4.41752	3.98641	2.38957	3.3799	2.04963	2.22342	2	2.36177
HEATR5B	0.093803	3.56194	2.51349	3.41684	3.51602	3.24336	3.58616	2.82375	3.70266	3.80012	2.93923	2.43829	4.15866	3.79597	2.38681	3.45681	3.54844	3.48414	3.84398	2.44626	3.57531	3.25701	4.46271	3.20945	3.30597
SEC62	-0.0146716	6.0663	4.6153	5.34518	6.19574	5.63052	5.82222	8.28503	5.67158	5.48091	5.81762	5.75969	5.90809	5.23189	4.20163	6.42324	5.99073	6.3512	6.51617	5.3978	5.07382	6.15583	5.99005	5.37747	5.6642
RPS20	0.00483845	11.7502	12.2213	13.1439	12.7342	11.1037	11.6212	13.7384	12.3805	12.1079	12.3023	12.9024	12.2071	11.617	12.917	12.6551	11.742	12.0922	11.3415	12.5499	11.8114	10.733	10.7768	12.621	13.4159
CSDE1	-0.156353	8.84909	7.09371	7.49265	7.77933	7.64147	7.9394	6.34855	7.97218	8.10727	7.6669	7.24622	8.58169	8.12505	7.29829	7.59552	7.62841	7.7976	7.89039	7.3779	8.00619	8.13571	8.1813	6.82069	7.33083
UBE3C	-0.306326	5.28281	4.55459	4.63575	4.86196	5.75007	4.29793	2.80323	4.79181	5.1375	3.53605	3.38957	5.31179	4.77768	5.03518	4.46793	4.91695	4.96255	4.58135	4.03562	4.63343	5.12557	4.1811	4.56255	2.81352
REV3L	-0.160031	3.64155	3.12763	3.64501	3.92979	3.32048	4.07125	2.79494	2.90689	3.8953	2.15381	3.08746	3.46858	3.74953	1.66903	2.98185	3.41278	4.07724	3.56071	2.74631	2.76553	3.15218	3.42089	2.52857	3.87774
TRAF3IP3	-0.324948	6.31198	6.04767	4.98185	7.08311	5.61471	2.56316	5.42794	3.80012	3.27202	5.50621	4.66846	2.94486	5.06824	6.01369	5.99481	2.9241	4.41414	6.51065	5.24375	6.21762	0.62293	3.89142	0.575312	4.83845
POMT2	-0.172237	3.09424	3.82273	3.20789	4.04352	3.80012	4.04177	1.79494	3.33056	3.26153	3.88069	2.76129	3.30597	3.47638	2.26003	3.34625	4.25323	4.32697	3.74631	1.47508	3.16993	3.20633	3.95791	3.9644	1.93734
VTA1	-0.015396	5.96	4.92695	5.72574	4.95838	5.59574	6.06846	4.2765	5.32193	5.02724	4.94158	5.29536	6.23036	5.28577	4.68594	5.23917	5.79103	6.01212	5.70515	5.23496	5.35755	5.25776	5.64904	5.81788	5.15664
BAZ1B	-0.172403	5.4851	4.81967	4.70764	5.23266	5.97453	5.60644	3.40735	5.15381	5.50303	6.44195	5.08661	5.65735	5.73742	4.85549	5.09845	5.64875	4.79233	6.17552	5.25663	5.47994	5.63081	5.50112	4.50843	3.0635
RANBP9	0.0646703	4.28466	4.82934	6.10601	4.94813	5.13545	4.62877	4.77136	4.13832	4.24565	4.65076	4.61294	4.97453	5.15785	3.93546	4.97865	5.53076	5.70598	5.47865	4.64386	3.99186	4.51538	5.19613	4.80941	5.14241
SPRTN	-0.222533	3.76235	2.31904	2.75275	3.65306	2.92979	3.12102	2.26604	3.12267	3.03386	2.26903	2.40871	3.60407	3.11603	2.10769	2.68706	3.88069	2.67356	3.59216	3.10098	2.85997	2.85599	3.09761	2.81762	2.01078
EEF1AKNMT	-0.0689375	5.60021	4.77347	4.68145	4.91504	5.22226	5.58436	3.04963	5.25248	4.74846	4.43962	3.89433	5.85574	5.36947	5.06953	4.7703	5.39266	5.37573	5.24489	5.43329	5.01123	4.50526	5.6241	4.62644	4.19535
DYRK4	0.27967	2.60644	3.62994	4.8212	4.64386	4.9241	5.19889	5.54226	6.18428	4.62994	5.12887	4.52857	5.97154	5.32012	4.37921	4.35755	4.86443	5.49985	5.06738	4.93876	5.21412	3.22805	5.20124	5.58256	3.78764
ZNF207	-0.194227	7.38552	6.55244	7.15086	7.37382	7.38016	6.56407	5.9472	7.56323	6.97671	6.74551	6.21296	7.95873	7.54373	6.22168	7.07735	7.376	7.41397	6.82464	7.32274	6.46809	6.40565	7.51948	6.90521	5.93993
UQCRC1	-0.237524	7.70307	7.95873	7.89615	7.69167	7.69599	7.68594	7.00439	7.96826	7.27296	7.82094	6.92576	7.76732	7.68313	7.71198	7.64191	7.8289	8.50569	8.04325	7.54928	8.60659	7.69502	7.45935	7.1823	6.44095
STARD3NL	0.186344	5.23993	4.40599	4.72955	5.04221	6.03452	5.7447	3.37712	5.24451	4.93357	4.63633	5.04396	5.95	5.04264	4.71039	5.10852	5.03034	5.59902	4.70819	5.5549	5.0955	5.37573	5.75649	5.43229	5.03914
CD9	-0.0411905	2.28392	1.57046	2.16027	3.29425	4.60526	0.536053	1.82782	1.87578	1.1635	2.65306	3.85997	3.52356	4.39506	3.41549	4.61648	1.58496	2.15381	1.23266	0.356144	2.06005	7.66149	2.15381	0.863938	0
NCAPD2	-0.186969	5.99254	5.9528	5.92481	6.90545	6.39626	6.18745	4.6893	6.15015	6.13607	6.14037	5.34305	7.00034	6.47946	6.39438	6.40054	6.2114	6.71205	6.36124	6.0955	6.47298	6.09571	6.37434	5.62264	3.8885
IFFO1	-0.338589	4.59753	4.64904	3.86888	5.32337	3.9855	3.64039	4.10769	4.08321	4.35685	2.68482	2.91456	3.45943	0.124328	4.06005	4.33771	0.226509	4.22342	4.54473	2.66903	3.98823	2.73552	4.39917	3.04963	3.48285
PHF7	0.00595147	4.07639	3.95977	4.36597	4.99774	3.07895	4.84449	2.79701	3.70155	4.95047	4.5741	3.77716	3.04789	4.90352	2.8679	5.31433	3.84197	5.4219	5.17672	3.92884	5.32769	4.24717	5.03562	2.82782	3.26153
NISCH	-0.294554	5.47476	5.13996	4.97085	4.90063	5.29499	5.52763	4.7148	6.83832	5.36247	5.0321	4.27947	4.99774	5.20438	5.23955	5.45648	4.99955	6.01703	5.7447	3.92029	5.33878	4.8674	5.7137	3.54597	3.851
STAB1	0.203748	0.0976108	0.62293	0.0976108	1.98185	5.22188	3.92125	0.475085	5.03562	0.584963	0.0285692	0.0840643	5.04352	1.02857	0.137504	0.189034	6.15076	0.111031	0.189034	2.67356	0.0285692	0.0976108	6.21568	0.0840643	5.57077
FUZ	0.208518	1.50589	4.16912	2.37573	4.45154	3.98459	4.08831	2.96717	4.98687	3.20789	4.0027	2.44626	4.88166	4.90881	3.98277	4.01703	4.9982	4.17393	4.18824	3.86592	0.163499	4.39917	5.0072	4.48671	2.7761
IDS	0.33204	3.7761	2.26903	1.64616	3.7866	2.27798	3.72137	1.41684	3.84298	2.99095	2.81147	3.40599	4.1177	3.32769	3.58135	2.91265	4.38888	3.17632	5.90063	3.08916	3.53481	4.8846	3.7866	1.91839	3.87578
ZNF200	-0.14265	4.06609	3.43429	2.79077	3.52105	3.26003	1.92979	2.99639	2.95047	2.80941	2.41684	3.30159	3.52231	2.72247	2.72247	3.23573	3.52607	3.28836	4.12019	3.10769	2.7761	2.76977	3.73769	3.61117	2.58015
CD4	-0.455899	6.20867	6.0864	6.60541	6.19081	5.17752	5.51286	6.58015	5.83996	5.92624	5.67723	6.96567	3.83188	5.09339	6.82655	3.11936	4.84348	5.06738	6.66121	5.73931	6.61912	0.536053	6.44956	0	2.09085
LRRC23	0.102944	1.75702	3.42089	1.72247	2.73335	1.73118	2.24184	2.38957	2.41684	1.25701	2.50589	3.77505	1.98185	2.96162	2.82782	2.36177	1.57046	2.37295	4.15543	1.80323	3.10769	3.49697	2.32769	1.72247	1.97085
BTK	-0.0413111	5.90665	5.904	6.12846	6.77939	5.95977	6.35861	5.96855	7.78979	6.92196	6.26172	6.47346	7.73938	6.56056	5.74792	6.26059	6.96151	6.25493	6.21626	7.59455	7.0594	0.137504	8.09993	6.06867	5.48543
SCMH1	-0.450028	7.39772	3.99729	4.47184	5.12763	5.01123	5.44758	4.02857	5.17991	5.12928	5.04264	4.15785	5.03826	4.50016	4.41143	5.03166	3.21878	5.24565	5.12805	0	5.37295	4.57592	1.55582	2.74416	4.16912
FYN	-0.0949338	5.05137	1.76129	3.8953	6.08619	4.85449	0.367371	7.04188	5.40156	3.35473	4.39025	0.333424	5.50112	5.02503	3.80735	4.67807	2.7761	5.97728	6.8505	3.76447	3.61824	4.76288	4.28688	5.65992	0.189034
ELOA	0.014784	4.35614	3.69488	3.8125	3.72137	4.32121	5.00045	2.47249	5.17592	4.44162	3.80735	3.18745	5.86814	4.57954	2.95606	3.73444	5.78293	4.51916	4.0009	4.76341	3.38405	4.75061	4.40871	4.36036	3.21257
LYPLA2	0.236	5.63372	5.85699	5.39712	5.05355	5.46369	5.65793	4.66846	6.59679	5.21374	5.72192	5.30049	6.36019	5.79416	5.35544	5.70487	6.34837	6.2407	5.73823	6.17513	6.06996	6.22052	5.75889	5.40293	5.58436
CLCN6	0.00771428	3.65535	3.66903	3.48156	3.88264	4.23573	4.20085	2.72683	4.25248	3.63691	4.23726	1.9855	4.68089	3.60526	2.87971	5.17513	4.45286	4.55766	4.21568	2.78241	3.94673	3.31615	5.02724	3.13258	3.1811
MRC2	-0.39096	7.26031	6.13996	5.69572	6.0555	6.02945	2.70044	5.21607	3.87971	4.92315	5.2604	3.26754	4.07211	4.05572	7.68811	5.72874	0.485427	5.63778	6.36982	0.604071	6.20809	6.03914	2.30743	2.89724	3.81455
NME1-NME2	-0.19742	5.13504	4.74739	5.82782	4.75168	5.51128	6.66818	2.73985	5.46891	6.62659	3.51728	5.52168	5.53481	3.95047	3.62877	3.41549	5.26454	6.72506	4.16912	6.23343	4.97361	5.90207	4.42626	5.142	3.17313
BTBD7	-0.395997	4.14405	3.13258	2.7845	3.37016	3.31904	3.65535	2.37573	2.20477	3.86196	2.95977	2.79701	2.82782	3.08576	3.62761	3.14078	3.48156	3.08406	3.03738	2.65306	2.67807	2.66221	3.19061	3.1177	2.37295
APBA3	-0.0832959	3.58135	3.854	4.09677	3.43429	3.52482	2.70708	2.32481	3.38819	3.67582	3.34199	3.50208	3.08916	3.80941	3.5008	3.63575	4.0268	3.6565	4.45681	3.92884	3.81044	3.91456	3.31179	3.15381	2.59455
MKS1	0.155935	3.72901	3.21568	4.06523	3.49185	3.94392	3.61235	3.55949	3.85997	3.34908	4.01525	3.77505	3.49185	4.5292	3.71149	4.05311	3.60644	4.71973	4.01614	3.86592	3.41007	4.60822	4.63865	3.59335	3.12433
ABHD5	0.289995	3.26003	1.91456	2.31615	2.72683	2.57046	3.11603	1.88753	4.65992	2.74201	2.17951	2.02148	5.6094	4.13422	2.26303	2.08066	4.17313	4.07125	3.50716	3.39917	3.08066	2.74846	4.27575	4.74362	2.79701
AKAP8L	0.186216	5.62205	5.44659	5.30195	4.92932	5.45845	5.41007	4.61883	6.1177	5.24793	5.2407	5.79753	5.46793	5.4591	5.60288	5.26003	5.18666	5.52857	5.99254	5.73281	5.85474	5.36947	6.62819	5.89385	5.0197
MBTD1	0.0651097	3.51223	3.36177	3.41819	4.3875	3.77189	3.88753	2.90881	4.37782	5.05398	3.68257	3.42895	4.77347	4.34554	3.29278	3.82579	3.9607	3.8339	4.08746	3.99548	3.53356	2.94486	3.93923	3.40735	3.67582
UTP18	-0.10424	5.63633	5.70736	5.96809	5.68902	6.15563	6.25115	4.72301	6.32211	6.38733	5.22728	5.01257	6.77479	5.59096	4.98322	5.6453	6.12639	6.67412	5.46336	5.61941	5.73281	6.30725	5.64674	5.34092	5.28873
RNF216	-0.125812	4.3427	3.44758	3.56438	4.01167	4.79857	4.98368	2.59216	4.38267	4.32841	4.0268	3.11103	4.20477	4.22959	3.51854	4.0993	4.52293	3.8339	3.50716	3.40599	4.4121	4.68482	5.66078	3.52607	2.51096
TTC19	0.314884	3.57773	4.15543	4.09761	4.6427	4.90689	4.17552	3.24793	4.92267	4.23649	4.51223	4.24945	5.04133	5.20828	3.57046	3.46858	5.00045	3.95977	5.13258	5.07468	4.65878	4.67638	5.47379	3.66676	4.72738
PTBP1	-0.276605	8.2564	7.57008	7.78143	7.81532	7.78555	7.92469	6.66676	7.84009	7.81545	7.50795	6.89676	7.80103	8.17921	7.73829	7.60837	8.39532	8.07692	8.51361	7.59917	7.81698	7.56659	7.86623	7.13103	6.33628
LARS2	-0.0205282	4.04701	2.63923	3.46336	3.33914	4.13914	4.18349	1.79077	4.10936	3.46336	3.54473	2.95977	4.6792	4.24031	2.85997	3.60526	4.30597	4.41616	4.14486	3.64847	4.01614	3.96625	4.30378	3.06695	2.05311
PIK3C2A	-0.148906	3.37434	1.89142	2.79701	3.10769	2.64847	2.67129	1.65992	2.52607	3.57531	2.22959	2.44626	3.1177	3.02503	2.06695	3.0036	3.64616	1.89142	3.3147	2.37851	2.72028	3.3505	3.46989	1.71809	1.52105
PLAUR	-0.076862	4.96162	5.71754	6.73688	5.57289	4.76022	3.37434	4.82833	3.9607	3.0635	5.64789	4.8485	3.63343	4.78293	6.61221	6.28003	3.44626	5.55827	5.79129	3.29572	5.16148	7.23582	5.57833	3.26153	4.78188
ANLN	-0.28836	5.24907	4.52669	4.18587	5.32373	5.64559	4.66448	3.37851	3.01257	4.55459	4.2555	3.75489	4.45812	3.93357	3.69377	4.8515	4.90545	4.93404	3.73552	3.23419	5.08704	5.93097	4.54967	3.98732	3.22651
WIZ	-0.240778	4.17313	4.15056	3.63459	3.2854	3.64847	3.46728	2.55582	4.06264	3.58376	3.43962	3.17153	3.96347	4.0009	3.55704	3.3978	4.03298	3.80941	4.32984	3.33628	3.39506	4.41819	4.04439	3.06695	2.67129
RABGAP1	0.229771	3.22342	2.55336	2.86592	3.20477	3.64731	3.72683	1.9222	3.93546	3.4957	2.93923	2.80116	4.2211	3.84499	3.30012	3.42492	3.59932	3.21723	3.93923	3.83693	3.22033	4.0781	4.15704	3.10266	2.61824
QPCTL	0.0365659	3.6893	4.37295	4.39232	3.69711	2.89724	3.32481	2.7866	3.26003	3.82477	3.15056	2.74631	3.14241	3.66221	2.73552	4.60644	4.90833	4.05745	4.84298	3.09085	4.65478	3.7845	3.58856	4.3147	3.22805
PPP5C	-0.304582	6.59425	6.36492	6.76168	6.18369	7.93652	6.71053	4.61176	7.09159	6.30943	6.17093	5.65592	6.79896	6.33396	5.44394	6.05485	6.78477	6.81839	6.8485	6.11645	6.51191	5.6907	6.49905	6.1813	5.11853
CEP68	0.0829457	2.32193	2.02857	2.34767	3.12763	3.04614	2.86394	1.26303	3.30159	2.24489	2.45681	2.26903	3.52857	3.20945	2.12102	2.41143	2.89918	2.15381	2.62059	2.39232	2.38405	2.82579	2.74201	2.33914	2.43829
MAP4K3	0.220421	2.57046	1.95606	2.09085	2.17632	2.52105	3.30305	1.88362	3.11936	3.24793	1.86394	2.16027	3.23879	3.33485	1.82782	2.43029	3.08236	2.62761	3.07382	1.45418	2.59932	3.8166	2.67129	2.26903	2.99639
TYROBP	-0.191981	8.24669	8.43308	8.32719	8.43858	4.65306	1.9782	8.59563	6.23879	0.879706	8.42735	8.37086	4.49249	4.59932	7.70293	9.2601	7.68706	6.33235	7.98914	6.23554	5.97545	0	5.7761	3.2854	7.48615
TMEM159	0.405881	3.04439	3.46336	3.33771	4.41414	2.9222	2.99095	1.72683	3.62059	2.66676	3.39369	3.53481	3.53978	3.59694	3.65076	3.1635	3.9514	4.19692	5.34305	4.42694	4.29278	2.94298	4.15381	3.22959	4.23879
BRCA1	-0.340176	5.45648	4.52982	4.64039	5.26416	4.83137	5.02724	3.31904	5.01391	4.8475	4.49313	4.47832	5.95257	4.95791	3.774	4.91265	4.0036	5.13627	5.76924	4.19061	4.75489	4.38957	4.49889	3.55827	3.59694
ERCC1	0.0674625	5.84549	6.26622	5.98891	5.90545	4.25172	5.35014	6.42543	6.42761	4.8846	5.90424	5.47119	5.81506	5.53636	5.95233	6.10329	5.72819	5.84474	6.88679	5.7939	5.72438	7.68047	5.54195	5.92339	5.42928
MBTPS2	-0.0379379	2.96347	1.88753	2.15381	2.9486	3.16189	2.93734	0.847997	2.76341	2.43563	2.59932	2.93357	2.99458	3.35473	2.488	2.85599	2.28688	1.24489	3.11936	2.26604	3.47508	3.83188	2.85997	2.65764	1.19535
PRICKLE3	-0.0879341	2.9279	3.00899	2.57773	2.9855	2.95791	2.86987	1.73985	3.26303	2.27202	2.72683	2.15704	2.87774	2.96717	3.28983	2.71809	3.69711	2.79077	3.63459	3.08066	3.22959	2.21412	2.96901	3.39094	1.37295
EXTL3	-0.154619	3.21412	2.44626	3.15543	3.31325	2.83996	2.92029	1.49057	4.07895	2.05658	2.96347	1.93357	3.38957	3.13258	2.61589	2.67129	3.5097	3.03386	3.16832	2.89918	3.16189	5.19377	3.36877	2.69377	0.31034
ELOVL5	0.281293	6.28522	4.87725	6.18884	6.9507	6.43679	6.93369	4.57168	6.49185	5.89142	5.92029	5.51412	7.00203	7.40071	5.37191	6.54396	6.0798	6.64414	6.52246	6.50954	7.15694	7.49649	7.1631	6.62848	6.03474
ALOX5	0.0748975	3.53605	0.757023	0.807355	0.650765	0.604071	4.60881	2.0036	6.74241	0.263034	3.49442	3.49185	1.91839	3.0993	3.22342	2.38128	2.26003	4.55029	6.53962	2.17313	0.536053	0.0840643	0.201634	0.378512	3.66789
KDM5D	-0.403386	5.93145	4.52482	4.28836	5.1152	0	0	3.94953	6.03452	0.0285692	0	3.43962	5.72955	0.0565835	0.15056	4.46793	5.37469	0.124328	4.19692	4.1811	0.0143553	4.02414	0	0	0
CALCOCO1	0.30615	3.71809	4.0635	3.94579	4.64155	3.8268	3.46989	3.12433	4.61058	3.97728	4.1416	4.09339	3.85997	5.23381	4.51223	4.16591	2.58976	4.80323	4.51602	4.52293	3.97269	4.34199	5.35297	4.2502	4.35685
UBR7	0.0683224	5.16872	4.65592	4.67864	5.0993	4.65878	5.25399	3.43962	4.44427	4.87725	4.50779	4.69209	5.15704	4.96809	4.35332	4.94579	5.03122	5.28244	5.65907	4.71149	4.9644	4.51223	5.39609	4.95699	4.46923
MAP4K5	-0.110403	3.55827	3.37434	3.46989	4.07125	3.69711	4.29425	2.83592	3.9607	4.23036	3.73444	3.63923	4.28466	4.15866	1.82782	3.77821	4.72192	3.15704	4.56803	3.64501	3.21568	4.31687	4.49378	4.07382	1.74416
PSMC4	0.119572	5.79416	6.49281	6.19633	5.34944	5.69766	6.40054	5.59634	6.62469	5.95093	5.71425	5.38888	6.68804	6.22477	5.47735	5.62673	7.29765	6.12205	6.68018	6.4814	6.20144	6.91468	6.72055	8.00017	4.78136
MAN2B2	-0.249811	4.9364	3.17473	3.20633	4.45746	3.23573	3.4489	3.07553	3.11437	3.37156	3.58256	3.01078	2.85997	2.96901	2.62994	4.0027	1.79494	4.08746	5.05441	2.53356	4.76447	3.81352	2.83188	1.71809	3.5008
SLC25A39	-0.0833437	6.50541	6.6872	5.95396	6.02989	6.57092	6.1645	5.70625	6.04023	6.455	6.87455	5.10811	6.24127	6.04461	6.08958	5.91265	7.70895	7.31515	6.10161	6.23055	6.30706	6.37591	7.37321	6.88056	4.78764
MVP	-0.134459	4.43829	3.65992	3.2854	4.25248	0.895303	1.18269	3.24489	1.83996	1.98914	4.92552	2.95233	1.41143	3.25852	3.78031	4.89336	2.06005	3.18903	3.19692	0.545968	2.67356	6.28762	4.59515	0.485427	2.10434
NUB1	-0.0322131	5.04614	4.22497	4.89336	4.96717	5.56346	3.86493	3.69933	4.63285	4.52356	4.18666	4.14568	4.59991	4.97682	5.2765	4.96347	3.79909	5.13791	5.39815	4.51538	5.13791	5.54226	4.94486	4.49057	3.86888
PGM3	0.0683014	4.35966	2.31325	3.6017	3.83592	3.66334	2.06005	2.20789	3.5008	2.47768	3.37851	2.96532	4.28762	3.74201	2.0321	3.6792	5.21568	3.8748	4.24717	3.0197	4.13258	5.84925	4.87922	3.97911	1.54597
CLK1	0.0881505	5.73552	6.24298	6.15583	6.53154	6.10287	5.30232	7.11395	5.97108	6.97751	5.88289	5.52982	6.48091	6.6978	5.32841	7.28596	6.27296	6.11353	6.12825	5.95606	6.12122	5.22381	7.32481	5.3726	6.60051
POLR3B	-0.0598397	2.43563	2.07039	2.8679	2.12433	2.8679	2.8953	2.23266	3.61824	2.53854	2.34199	2.68706	3.9644	3.27053	1.80735	1.59455	3.82782	2.02503	3.13914	3.29425	2.09085	1.91073	3.10601	2.64386	1.53605
ANGEL1	0.032593	3.67356	2.70266	2.95606	3.73985	3.56438	4.43095	1.774	3.78031	4.67243	3.88264	3.23419	4.07382	4.09001	2.97085	3.12598	4.31397	3.74631	4.56133	2.56316	3.96717	3.45154	3.64847	3.30889	2.69153
RNF14	0.0066582	4.82273	3.67016	4.09761	4.13093	3.82477	4.37156	2.48285	4.55766	4.12102	3.95047	4.23343	4.7252	4.58856	3.37156	3.774	5.23151	4.23879	5.58045	3.97636	4.29793	5.70155	4.11437	4.36597	2.92029
DNASE1L1	-0.0213753	4.19456	2.91839	2.85599	4.07895	2.07382	2.94298	1.76977	3.23726	2.57773	3.57046	2.51854	2.44361	3.10434	3.37434	3.61941	3.61941	3.69042	3.38128	2.64616	3.87774	2.91839	4.12184	2.53605	2.8679
DDX11	-0.450335	6.14649	5.33056	5.40565	5.96809	6.2407	6.00518	4.11853	6.14384	5.78346	6.08044	4.96116	5.99005	5.7137	4.78607	6.11499	5.92955	5.94977	5.79727	4.20006	5.61265	4.79857	6.30542	3.65764	2.32193
HEBP1	0.260161	4.23266	4.06091	4.79025	5.38612	4.11437	3.18269	4.21179	3.9486	4.59395	5.21956	4.60526	4.44956	4.89676	4.69153	4.52982	4.40259	5.56803	5.68398	4.07895	5.70404	5.40667	6.41041	3.38957	4.30451
TACC3	-0.325943	7.08566	6.80439	6.02702	6.37295	7.1535	6.8431	6.4165	5.77926	6.16531	6.33914	5.97223	6.51207	5.93805	5.81558	6.39489	6.55903	6.94251	6.46254	5.55949	6.6343	5.8999	5.26679	6.30488	6.79494
UFL1	-0.0486538	4.08831	2.28096	3.99729	4.39232	3.4019	3.52607	3.44095	3.48929	3.50462	3.65306	3.86096	3.83491	3.87086	2.83794	3.82477	3.71149	3.8166	4.31832	3.03562	4.21101	4.64155	3.77083	2.86394	2.83996
POLA2	-0.490783	4.96993	5.04789	4.77241	4.97223	5.35826	4.42089	4.35966	4.96671	4.51916	4.9644	4.39575	5.50653	4.99594	4.26003	4.92979	3.83693	4.7339	5.27761	3.94953	4.43829	4.23189	4.5601	3.83289	3.90593
ZC3H3	-0.164904	3.64039	3.82477	4.02326	4.49761	2.7866	4.03386	3.14731	3.52982	3.7126	3.72028	2.26303	3.30451	4.28244	3.56194	4.01257	3.27947	3.90785	3.24793	2.51096	4.13504	4.04527	3.52982	3.48543	3.38681
CAPN1	0.286557	5.95907	5.62585	5.58105	6.02658	6.51254	5.89676	5.35896	6.84185	5.04396	6.01837	5.14812	6.74389	6.92979	5.804	5.80993	6.38336	6.21723	6.38042	6.13566	5.63459	5.96763	7.38974	5.47021	6.77742
ACPP	-0.0305779	3.74739	2.27798	2.04264	3.46074	2.0635	0.83996	1.74846	3.05311	0.9855	4.4522	3.97453	3.8125	3.16511	5.67892	2.20477	3.70044	4.20867	4.38267	0.739848	1.8679	0.0703893	4.85898	0.632268	1.4489
MDH1	-0.242309	8.28974	7.30314	7.8062	7.71596	7.27705	7.43613	7.38353	7.64451	7.55098	7.74504	7.57901	8.42601	6.88362	6.59708	8.16817	7.46099	7.73775	7.49881	7.47573	8.53893	7.84718	7.1921	6.88203	7.18953
SLC30A9	0.0491465	4.89191	3.9855	4.08066	4.60466	5.01926	4.21878	2.58256	4.84699	4.72955	4.69711	4.67129	4.91886	5.11977	3.49057	4.99232	4.35685	3.7845	5.23419	4.85499	4.43696	4.99095	4.52482	3.926	4.31832
COX15	0.462042	3.14568	3.72137	3.61589	4.39232	4.29939	4.53854	3.83188	4.10266	4.28466	4.5735	3.89627	4.39575	4.41007	3.851	3.6427	3.98823	4.07724	5.20359	4.00988	4.90929	3.77189	4.36317	4.03826	4.51979
CCDC88C	-0.0441985	3.50462	3.61117	4.22805	4.44162	4.62585	4.77926	2.32769	3.8268	5.16872	4.81865	3.0197	3.83592	4.54782	4.34199	4.88557	5.04963	4.34056	4.52105	3.33056	4.0365	2.29572	4.39369	3.2032	3.26153
YAF2	-0.000134656	3.29866	3.75061	3.57894	3.86592	4.05658	3.88557	3.10098	4.19771	3.78764	3.28096	3.40327	4.69933	3.83086	2.86394	3.51854	4.43829	3.7301	4.61589	3.9241	3.43563	3.17153	4.14812	3.37156	3.18587
ZMYND11	-0.0179325	3.86196	3.56316	4.13258	4.97865	4.78136	5.11894	3.0635	5.20867	4.8679	3.43829	2.40871	5.40293	5.05224	3.93546	3.21568	5.09592	2.19219	5.0018	4.12267	4.10685	4.85748	5.0993	3.94111	3.69265
WAS	-0.163356	6.16189	6.23783	5.79986	6.62512	5.1807	6.23285	6.26303	5.75168	4.88362	5.76182	6.14588	6.27277	5.80632	5.97659	6.00293	6.03936	6.4694	6.48961	6.87946	6.69947	0.575312	5.7498	3.16027	6.18567
BID	-0.223169	5.87946	6.09424	6.09677	5.68538	6.40735	6.0398	4.82018	6.57652	5.34305	6.3036	4.46074	6.31904	5.79416	6.79623	5.76315	5.88996	6.73998	6.31578	5.61883	5.68986	4.7703	5.86716	4.79753	5.12102
MATR3	-0.0210268	7.30086	6.92612	6.92291	6.92754	7.36212	7.40548	5.20046	6.80025	7.62571	6.71205	6.97269	8.05409	7.49721	6.02436	7.01257	7.76368	7.23199	7.40574	7.30925	6.98948	7.33154	7.10381	6.988	6.30415
XYLT2	-0.21453	3.98277	3.95047	3.51223	3.47249	3.38957	3.55704	2.93546	4.66278	4.06005	3.06005	3.06523	5.22805	3.69042	3.46336	3.29425	3.30305	4.34483	4.15056	2.75916	3.6893	4.09677	3.3505	3.20006	2.78241
RGPD5	0.0358567	3.63459	0.632268	2.20789	1.30451	1.78241	4.88069	0.400538	4.59156	4.12763	2.66448	2.93546	4.43429	0.695994	2.23573	0.85599	2.5509	2.5435	2.71809	1.66448	2.85599	4.93593	5.27202	2.22959	1.30451
NUDCD3	-0.123166	5.16027	4.37226	4.27426	4.56682	5.92624	4.91504	3.40735	4.7939	4.64616	4.76553	3.89336	4.6792	5.62965	4.65821	4.69042	4.65019	4.90256	6.26021	4.36527	5.47865	5.30049	5.38922	3.09592	3.35896
GLT8D1	-0.153911	5.5552	5.65764	5.25361	6.42223	5.53574	5.09803	4.88118	5.13299	5.57864	4.8212	5.37365	5.33985	5.41244	4.35332	5.31034	4.95373	5.70293	5.72165	4.92837	5.65821	6.49522	4.89821	4.99639	5.44294
ATP2C1	0.242151	5.18626	3.86394	4.38474	5.02724	4.93687	6.19515	3.6311	5.76315	5.88704	4.97911	4.67073	6.43279	5.774	4.07296	5.2149	4.95838	5.54442	5.79649	4.52419	4.77294	5.6744	5.91217	4.52482	5.44526
SLC38A5	-0.265887	5.76977	5.53387	6.09318	5.41752	6.57031	7.1635	5.05441	6.07767	6.57909	5.16792	0.263034	6.14323	2.05658	5.23036	5.15623	0.214125	6.46287	5.90857	6.4733	1.02857	0.378512	6.36457	7.67073	3.99095
RALBP1	-0.153338	5.37226	4.86245	4.86245	5.26341	5.05355	5.23764	5.03826	4.80478	5.61971	4.88166	3.27947	5.0197	5.35085	4.66334	5.71205	5.50016	5.48607	5.12516	3.86987	5.28133	5.23496	5.56255	4.26003	4.50779
RUFY3	0.321884	2.77821	1.07039	1.4957	0.575312	3.39094	4.27053	1.774	3.52356	4.47444	3.72574	2.8679	3.54473	3.76977	2.63459	4.25852	3.21101	3.34056	3.64847	1.848	3.88655	2.926	4.52231	3.04614	2
AGPS	0.0328352	5.34447	3.84499	4.69098	4.88557	5.39266	5.98322	3.6241	5.34767	5.27575	4.39506	4.38405	5.79051	5.47638	3.61706	4.50462	5.96209	4.83592	5.41278	4.7137	5.08108	5.11936	5.22651	4.7021	4.68594
CXorf56	-0.0487369	4.03298	3.69599	3.93923	3.70487	4.32769	4.02148	2.20789	3.48543	3.67807	4.58316	3.74631	3.58256	3.80735	3.69822	3.93829	3.83996	4.62117	4.44692	4.13422	4.64443	4.10014	4.40667	3.65764	2.4489
TTC27	-0.0108257	3.91456	3.26153	3.849	2.66448	3.65878	3.8268	2.82985	4.23189	3.73877	3.33771	3.20945	5.13011	4.26003	2.93357	3.02148	4.82426	4.03386	3.57531	3.53854	4.31107	4.23879	3.82782	3.66107	2.488
CD74	0.0112128	6.57833	7.66917	6.69279	8.14593	1.32193	7.36947	8.51712	6.17712	7.01514	11.0761	4.06781	5.33593	0.948601	6.53993	10.2333	6.59679	5.85499	9.40899	3.85997	5.54195	9.53716	9.32537	0.0285692	9.20222
HGF	0.103399	1.70487	0.0426443	1.30451	2.85	6.12309	1.55582	1.07724	2.35332	1.8679	3.24184	0.0285692	2.39506	0.0565835	3.43829	3.46989	1.18903	6.17772	5.28207	1.09085	0.201634	4.28096	1.09085	0.124328	2.44095
ZRANB1	0.342276	2	2.36457	2.47249	2.76341	3.27202	3.13914	0.910733	2.87774	3.50208	2.54597	2.88753	3.37016	3.26003	2.42761	2.20163	3.79181	2.88753	3.50716	2.73335	2.86394	2.40327	3.78555	2.44095	2.96532
NCDN	-0.122353	4.15056	3.83996	3.53232	3.65764	3.98641	4.37921	1.95233	5.03386	4.4121	4.1416	3.16832	4.74631	4.00899	3.95791	4.13832	4.27798	4.54844	4.39438	3.488	3.86888	4.68257	3.853	2.9782	2.49313
ADGRA2	-0.396628	6.05745	5.07339	2.76341	5.37016	2.46728	1.61353	2.08746	0.422233	1.40599	5.35297	1.86394	1.05658	0.9855	5.89676	5.73498	0.333424	0.704872	3.31325	0.15056	6.99198	0.799087	0.163499	0.0840643	1.20789
ZFP64	-0.0721266	3.77505	2.61824	2.77189	3.08576	3.33056	2.6893	1.25096	2.76553	2.60407	3.09424	2.27501	2.90497	3.18745	2.9542	2.88947	3.40463	2.53854	3.30305	2.89918	3.38405	4.54535	3.29866	2.63923	1.9486
MNAT1	-0.0295678	4.95931	4.59813	4.78031	4.90593	5.09635	4.99413	3.25852	4.71589	4.88264	4.94345	5.32517	5.04264	4.75007	3.46336	4.55336	4.99141	5.71946	5.26903	4.94626	3.46728	5.59305	4.88996	5.82451	3.85699
RUNX3	-0.188082	4.26228	4.71973	2.66221	3.22959	4.62	4.32769	2.13422	0.505891	2.89724	3.13093	3.32193	1.81558	2.50589	4.47703	2.88362	2.81967	4.79129	4.76818	1.99639	4.63459	0.704872	3.94486	0	3.77821
MRE11	-0.226074	4.60466	4.72683	4.13422	5.25663	4.55152	3.28983	3.61824	4.86443	4.1811	4.24184	4.08491	5.5097	4.21101	3.53232	4.24793	4.72301	3.98914	5.64155	4.33199	4.03826	3.90977	4.59515	3.64731	3.54226
SERPINB1	0.318582	4.20242	5.49217	6.54952	7.02126	5.1823	7.48099	5.11228	6.5008	8.71925	6.53838	7.27966	6.49249	6.67934	5.91121	7.4358	7.43663	10.0399	7.55036	5.76553	7.69488	0.0976108	7.49593	5.93617	9.52974
SPAST	0.290334	2.74201	2.62059	2.83794	2.66676	3.32048	3.15218	2.02148	3.48156	3.5373	2.5656	3.20477	4.12516	3.47897	2.23266	3.38405	4.27426	2.41414	3.25852	3.42223	2.93357	3.30305	4.08661	3.10769	2.90304
OSBPL5	-0.31279	5.77294	5.54998	4.41549	4.90497	5.85474	1.88753	3.57773	4.57046	0.956057	4.90448	2.40054	4.03298	4.848	5.69237	5.53947	2.77189	4.97223	5.6241	1.45943	4.8679	3.08916	5.69516	1.24489	2.58976
AQR	0.194042	4.32841	3.58135	3.62176	3.81147	4.19377	4.22728	4.49313	4.27202	3.03914	3.86196	3.43296	4.86839	4.45022	3.06178	4.10685	4.77083	4.31252	3.95233	3.99729	4.06264	4.19377	4.34908	4.51538	4.34199
RTF2	0.0338264	6.05745	6.61662	6.15623	6.26529	6.40259	6.64818	5.83036	5.6499	5.92695	6.67285	5.61912	5.94064	5.95745	6.02148	6.36999	6.03782	7.10727	6.65907	5.98755	6.36667	6.35738	6.48591	6.38128	6.06953
SLC45A4	-0.205271	3.46074	3.07895	3.46858	3.0197	1.4489	1.3505	2.16672	2.21412	1.78241	2.97085	1.9486	2.89918	3.98823	2.39506	3.02857	2.89142	4.27202	3.32625	1.4489	2.36737	2.39506	2.54844	1.38405	1.93734
RNF10	-0.0149892	6.2149	6.05463	5.73498	5.83971	7.16138	6.73186	6.52623	6.4002	6.24489	6.32517	5.85773	6.7828	7.12918	6.29112	6.05224	6.51428	6.8296	6.89057	5.57531	6.44477	6.1297	6.95641	6.35526	5.35579
ZNF839	-0.0727788	3.87184	3.06178	2.66448	3.0993	3.01257	3.57168	3.15704	3.04963	3.99458	3.64962	3.33056	3.0054	3.87184	3.07211	3.77083	2.98914	2.62994	3.68032	2.72683	3.14078	3.10769	4.05745	3.57773	2.75275
ZDHHC6	-0.0973406	4.69377	5.00944	5.50938	5.73227	5.83289	5.57016	4.55459	4.87578	5.83213	5.55582	4.82883	5.2817	5.17313	4.66391	4.55766	5.8387	6.00966	6.14445	4.31976	5.17473	4.14405	5.39712	4.66789	4.8846
RNH1	-0.477108	8.2873	7.9956	7.96122	8.35284	6.76235	5.99367	6.16048	6.84862	6.11374	7.02481	5.93357	5.89869	6.76009	8.64259	8.07607	5.74766	6.94193	6.7699	5.23189	7.91606	6.76818	8.26889	5.68622	4.10182
NDUFS1	-0.0847096	5.57198	4.86245	5.56894	6.06113	6.15745	5.13709	4.61824	6.06113	4.45812	5.50494	4.73715	6.39575	6.12226	4.74255	5.60703	6.09887	5.26791	6.15745	5.16993	5.70984	6.69502	6.29223	5.21374	3.75275
RB1CC1	0.0264399	3.83693	3.65535	4.34056	4.41954	3.40054	3.87381	3.15218	4.25852	4.07639	3.49442	3.50843	5.0648	3.58616	3.15704	4.31687	4.37016	3.7939	3.89918	3.34908	4.20867	4.02857	4.06178	4.38405	3.59574
ERP44	-0.193478	4.68706	3.72465	4.02503	4.04089	3.53978	4.07296	4.21645	3.27798	3.93829	4.37504	3.93168	3.74631	4.34127	3.69933	4.78031	3.39917	4.20867	4.68594	3.6792	3.67016	4.16672	3.02148	4.06178	3.73227
ALAS1	0.164446	5.78005	5.28614	6.02989	5.58015	6.2804	5.337	4.7137	5.7703	5.89409	6.37626	5.61971	5.45582	5.73417	6.09761	6.53745	6.17173	7.02281	7.08215	6.02547	6.14323	5.63343	5.45549	4.06264	6.15583
AKAP11	-0.274218	3.08066	2.55827	2.95606	3.49825	2.65306	3.46336	1.91839	2.31034	3.35896	2.81762	2.81147	3.0268	2.82171	1.83592	3.02148	2.38957	2.81762	4.33842	1.87971	2.18903	3.12598	3.09592	1.79909	1.76553
GLRX2	-0.347934	4.57168	4.59634	4.71205	4.75916	4.55152	5.05658	7.25937	4.84197	3.75168	3.28392	3.32048	5.62205	4.48285	3.99367	4.2555	4.43829	4.79597	4.30086	4.02945	4.28688	4.40871	3.70929	4.17951	3.59335
SNAPC1	0.019063	2.75489	2.52356	3.03562	3.39232	3.11936	3.26303	1.62761	2.69822	2.9542	1.70044	2.5435	3.04789	3.11936	3.86987	2.81967	2.67582	2.34767	2.62527	2.39232	2.73335	3.69265	3.72137	3.57894	1.94111
DERA	-0.122887	3.89239	3.98003	4.5741	4.20555	5.0237	5.41886	4.09508	5.36072	4.86394	5.04571	4.17073	4.99729	5.11437	3.42626	4.69822	4.02414	4.98185	5.72465	4.24031	4.91934	4.37434	4.74953	2.33628	3.39917
STRAP	0.12984	5.48091	5.97338	6.10077	5.78529	6.88801	6.89154	6.39455	6.75208	6.63923	5.89845	6.24317	7.44874	6.59335	5.39712	6.12474	7.13175	6.53652	6.55152	5.57924	6.27817	6.86059	6.45697	6.20984	5.73606
DEF6	-0.220113	6.55842	5.39438	6.37955	6.33932	6.50605	5.60703	5.8846	6.34979	4.81455	5.69711	4.91073	5.35509	5.36632	5.14934	5.49025	5.44857	7.182	6.53294	5.20281	7.5719	0.137504	5.94837	4.3427	5.88044
PLEKHO1	-0.0481117	3.69153	4.60407	2.98368	4.21335	4.40122	5.01212	4.42626	3.6017	5.21607	0.250962	4.23266	3.31179	3.73118	5.73335	2.18269	2.73985	2.74631	6.2937	0.887525	4.36457	2.80116	1.54102	2.55827	6.27352
GCLM	0.0407813	3.88655	2.10434	2.0321	2.68032	2.62059	2.32193	1.64616	4.77873	1.67807	2.09085	2.57531	5.22342	2.74201	1.74846	2.25096	4.53045	3.82171	4.15299	2.30451	2.76553	3.0993	3.22342	2.46989	2.15704
UBR2	-0.170327	3.83592	2.63459	3.64501	3.87578	3.48929	3.43429	2.83592	3.34341	3.44493	3.03386	2.74416	3.93923	3.57773	2.55827	3.19061	3.80632	3.46205	3.4489	2.47768	4.40122	3.38267	3.40735	3.09592	2.82171
EHD2	0.469661	2.70044	0.124328	2.01792	0.31034	0.321928	2.40327	1.01436	3.8846	0.214125	3.97453	0.298658	2.56071	2.65764	1	3.32625	5.53792	2.79286	3.92125	2.76977	2.24793	5.39266	5.72274	2.73118	3.74846
DEPDC1	-0.109349	3.94767	2.87971	2.96901	3.7126	3.60763	4.72247	1.69599	4.25096	3.85499	2.36457	3.04089	5.70321	3.63575	2.13422	2.89724	5.25588	2.87971	4.06781	3.18903	2.50335	5.01569	4.05572	3.4489	1.51096
CCDC28A	0.15947	4.6427	4.41549	5.49761	5.17153	4.5404	5.08151	5.31361	4.92458	3.38543	5.21218	4.43296	4.92029	4.62702	5.24108	5.35931	3.96162	5.99118	5.05658	4.14975	5.56894	4.17712	4.82324	4.90207	5.74308
RRAGD	0.0412969	3.88166	1.87184	2.92979	4.49057	3.41278	1.45943	1.99639	1.87971	3.95791	1.27501	2.29866	2.65764	0.0143553	2.58976	3.3799	3.3147	6.03364	4.24108	0.678072	4.06523	0.956057	0.739848	3.90207	4.39575
HSF2	0.0373823	4.08066	2.9222	3.95327	4.58436	4.14568	3.81147	3	4.24413	4.29572	2.89336	3.53481	5.00944	4.28318	2.57773	3.7148	4.18587	4.30086	3.8885	4.22342	3.19535	3.8679	4.09508	4.40463	3.61589
PHF20	0.200876	4.75809	4.34696	4.36667	4.34908	4.94158	5.12722	4.61589	5.73227	4.60644	4.32697	4.51475	6.3773	5.05137	3.72574	4.7761	5.26191	5.01569	4.58075	5.47151	4.77241	4.96255	5.11894	5.58706	4.58736
NR1H3	0.0434961	5.1334	3.49185	1.68257	2.21412	4.16108	2.84398	2.53356	3.71039	3.06005	3.60999	2.50589	3.38681	3.69933	4.8748	4.42626	4.17871	3.31615	4.87823	3.33342	3.2032	0.124328	3.98277	3.42761	4.04002
TYMP	-0.452955	4.60051	5.78973	5.51349	5.39746	2.0072	1.0072	3.91743	1.41143	1.33342	4.99367	2.80529	0.879706	1.31034	6.44062	6.62381	2.24793	1.30451	2.98368	0.163499	3.33342	2.46728	1.84398	0.0976108	0.739848
NCAPH2	-0.195592	5.5549	5.21023	5.08661	5.18587	5.64559	5.66647	5.41853	4.82579	4.73064	5.26529	4.53419	4.90785	5.42995	5.1177	5.40054	4.86839	6.48414	5.16551	5.44261	4.76394	4.80012	5.82018	5.37921	4.47444
TOMM34	0.035415	5.10769	4.92837	4.75489	5.08236	5.55919	5.49442	3.41549	4.91648	4.93734	5.6091	4.0027	5.79416	5.38888	4.15543	4.67186	6.1817	5.0993	5.0993	4.93452	5.30524	6.97143	4.6565	5.05961	4.46074
SEC63	-0.141108	6.23726	5.46467	5.63981	6.17792	5.42459	4.43162	6.12102	5.51033	5.57652	4.69432	5.1297	5.76607	5.47573	4.48349	5.50335	5.55735	6.41177	5.99367	5.06996	5.04177	5.12019	5.40667	5.42794	6.05028
KPNA6	-0.0386798	4.19771	3.59335	3.53854	3.45022	3.80323	4.39438	2.11103	4.34554	4.02503	3.39369	3.29425	4.90929	4.02591	3.35191	3.47249	4.37156	3.77926	4.12681	3.65306	4.03298	4.59515	4.37782	3.62059	2.74201
VIM	0.284731	4.71315	7.75542	7.69077	9.73772	8.40795	3.54226	8.65413	7.15502	2.30743	6.58286	5.28836	8.61213	8.04718	10.5765	9.66044	8.67744	5.68201	8.39528	8.60681	7.59962	12.9705	6.48107	8.08119	8.02342
FAS	0.239672	0.863938	1.76977	2.848	3.17632	2.89918	2.19535	1.86394	1.33914	0.475085	2.62527	4.05485	2.29278	2.61117	1.19535	1.0072	0.782409	3.69042	3.59813	0.275007	2.59216	4.37921	1.5008	2.0072	4.20555
RNASET2	-0.269427	8.58901	7.30761	7.71768	7.21752	6.53107	4.72901	7.90304	3.72683	7.2407	7.90923	5.66704	3.48929	5.53792	8.89703	7.86839	6.40446	7.89567	7.95942	2.0036	7.79507	5.33092	3.54102	6.10245	6.38509
CD44	0.345768	5.01391	6.14893	5.32805	8.39288	6.84599	6.75515	6.2538	5.2817	6.91922	7.30606	6.14303	5.92362	5.41481	7.78424	6.20555	6.4632	7.35632	7.41971	6.29848	6.30214	9.067	6.09424	4.95513	8.28137
BTN3A1	0.166084	2.43029	1.91456	3.14241	5.21296	2.79494	2.79494	2.70044	4.12516	1.97453	4.12928	3.67469	4.03122	3.37851	2.31034	3.99548	3.35755	4.22497	4.36527	2.74416	3.51979	3.71149	5.24527	1.40599	2.51096
MIPEP	-0.132376	2.54102	3.488	4.37851	3.78031	3.5435	3.57289	4.42492	2.90111	1.7137	3.42761	2.67807	3.41954	4.02326	2.67582	3.36737	3.51854	3.69153	4.70653	1.66903	4.1416	4.06523	2.30451	3.12763	2.52356
IFNGR1	0.103844	5.87676	4.36877	5.62732	6.38232	4.8475	6.14751	5.07895	5.0365	4.80271	5.78712	5.6744	5.52011	4.33128	4.43896	5.80323	5.00854	6.67553	6.36229	5.47865	5.83946	4.59156	5.02237	5.32229	6.30506
B4GALT7	-0.302775	4.31976	3.97728	3.89627	3.54597	3.63807	3.43962	3.83491	3.97361	3.50208	4.01257	2.78031	3.65535	4.21101	3.7137	4.5435	3.84298	4.00809	4.54473	2.69822	3.56438	5.01302	2.89724	3.09424	2.64155
SH2D2A	0.226104	1.91456	0.124328	1.59932	2.0072	0.903038	2.56071	0.790772	4.30159	0.933573	2.22959	1.89918	3.49953	2.83794	2.14731	2.02857	4.00809	0.111031	3.1811	2.50843	2.04614	0.0426443	3.52231	1.64155	1.9782
VRK2	0.186964	4.6241	3.29425	4.03122	4.44626	4.07125	4.54102	2.88557	5.13299	4.09508	4.20006	4.39232	5.29756	4.54782	3.0993	3.96255	4.81813	4.47832	4.68594	3.91934	4.44692	5.8212	5.50335	4.40803	3.849
TNFRSF1B	-0.108268	4.72356	5.27873	4.98368	5.71617	3.33628	3.13422	4.56986	0.111031	2.49825	5.28651	3.56071	0.536053	0.443607	7.91133	5.78162	4.31179	4.92362	5.81532	0.0703893	5.18943	1.99277	2.38957	4.25096	4.34554
VEZT	0.34582	3.65306	3.14078	3.57531	4.01703	4.51538	4.51159	2.95047	4.6865	4.71754	4.03826	4.68986	5.21296	5.53792	3.12102	2.86987	4.48543	4.62	4.73931	4.27724	4.0036	4.848	5.48414	4.1152	4.24184
POU2F2	-0.286372	2.66903	2.17313	2.87774	4.19061	1.58015	0.575312	3.13914	1.852	1.15704	2.93923	2.31325	1.57046	1.44361	0.933573	2.86394	2.56071	0.565597	2.19219	2.70266	1.52607	0.356144	2.96347	1.71809	1.66448
BRD9	-0.299399	5.62527	5.18031	4.89093	4.97774	5.71425	4.44361	4.29499	5.50843	5.11686	6.03672	4.10266	5.68061	5.55275	5.47086	4.67016	5.68594	5.15745	4.88899	4.8885	4.3799	4.77083	5.43829	4.91121	3.86493
SNX1	-0.0162677	5.8166	5.74012	5.73823	5.75542	5.82604	5.84348	4.83946	5.64414	5.6241	5.89506	4.76713	6.02702	5.74012	5.36492	6.17433	6.39541	6.57107	6.2114	4.9528	6.55121	4.62644	6.24203	5.09339	5.47151
TBPL1	0.179111	4.48929	4.22805	4.84499	5.40122	4.76235	7.33342	3.75596	6.95513	4.26153	3.83794	3.8339	7.12485	5.62469	4.15866	4.19061	6.58105	5.71891	4.66107	6.2572	4.57471	5.13627	6.80323	6.10936	4.72301
ARNTL2	-0.0489208	2.96347	0.555816	2.29572	3.09255	3.82171	4.47444	1.68706	3.10601	2.6893	1.20163	2.31615	4.02237	3.14893	0.604071	1.16993	2.59455	0.275007	3.48414	2.4957	2.19535	6.81839	2.0036	0.641546	2.43563
BCLAF1	-0.340495	6.46107	5.14527	5.84925	6.22226	6.21179	6.69822	5.67948	5.9798	6.27426	5.4002	5.26828	6.66888	6.22477	4.27873	5.42995	6.75475	5.4353	5.61442	5.70072	5.45385	5.21335	6.08279	5.77004	4.95093
SLC39A9	0.045555	4.75596	4.79961	4.46336	4.37016	4.17712	4.70984	3.65191	4.13504	4.77663	4.80478	4.49761	4.37921	4.63517	4.62877	4.90014	3.9542	5.13381	5.51223	4.20006	4.23419	4.20555	4.43095	4.36947	4.74416
TFB1M	-0.193638	4.0505	3.53978	4.77083	3.55582	4.05311	3.49825	5.0365	3.91169	3.76447	3.46336	3.74201	3.73877	3.58015	2.69822	3.98732	3.35191	4.42694	4.07211	3.23573	4.79961	5.47606	3.15381	3.45418	3.26604
RABEP1	-0.0106046	4.01078	3.89821	4.12598	4.5656	4.57894	3.68257	2.95047	4.904	3.80219	4.0321	2.82375	5.32841	5.13217	4.05658	3.46205	4.90881	3.61706	4.84097	3.66676	4.58736	4.74578	5.18745	4.41684	2.67582
HMGB3	-0.352043	6.9364	6.10329	6.20516	6.41261	7.4641	6.8358	5.82171	5.67892	6.31506	6.01792	4.71699	6.37434	6.9493	6.44128	5.95466	7.7449	7.08002	6.8392	4.8679	5.34056	6.17373	6.09001	6.21062	4.23879
NUP160	-0.277199	5.48478	4.31397	4.79025	4.95513	5.38716	5.34625	3.66221	4.58135	5.29572	4.54102	4.53169	5.43463	5.46695	4.30086	5.31361	5.16229	4.41075	4.92647	4.68201	5.17073	4.06523	5.67694	4.43162	3.24489
BAK1	-0.343243	5.18982	4.55275	4.91456	3.94767	4.64155	4.29131	4.00899	3.54226	4.02414	4.25096	4.26228	3.77083	3.86691	4.18269	4.80941	5.41109	5.21956	4.99005	3.92029	4.67356	3.77505	4.22419	3.92979	3.21412
GRN	0.026371	8.62837	7.30415	7.52505	8.05023	7.38767	6.30907	6.7494	5.20672	7.32445	9.2857	5.45582	5.18982	5.78712	7.85643	9.64035	5.8824	8.88053	9.46148	6.824	8.26162	6.52497	7.29149	6.47784	8.74729
FAM13B	-0.42613	4.46858	3.08406	3.69042	4.41886	3.89336	4.42089	3.36457	3.13258	4.79181	3.83895	3.45812	3.23266	4.45022	3.01792	4.2891	3.63343	4.45483	4.19298	3.0635	2.85599	2.56803	2.9782	2.15056	2.62527
CENPQ	-0.0203231	4.35896	2.74416	3.87873	4.47573	3.48543	3.84699	3.42895	3.41143	3.56682	2.85798	3.86691	4.1811	3.40463	3.27501	3.61117	3.26003	4.21878	4.4614	3.56925	4.34483	2.76765	3.50716	4.43029	3.53107
SARS1	0.109379	6.60777	5.8953	6.5941	6.50684	6.02348	6.22323	5.40463	7.97108	5.7926	5.85599	6.76035	7.24821	7.74194	7.71053	6.32481	6.6703	5.95024	7.18031	7.24631	6.6427	8.06107	7.49657	5.9465	5.14364
RANBP3	-0.233815	5.61471	5.69544	5.75462	5.2521	5.16752	6.1336	4.07895	4.99277	5.42526	5.43263	5.86592	5.64559	5.6893	5.24031	5.32048	5.53387	5.60763	6.39025	5.55305	6.07746	5.79103	4.77347	4.64328	4.05658
ARID4A	-0.233585	3.40871	3.3147	3.09085	3.79286	3.52607	3.48285	1.73552	2.87184	4.16832	3.11603	3.07895	2.83996	3.40327	3.14241	3.55213	2.71589	3.1177	3.55949	2.58976	3.10434	2.22651	3.52105	2.86196	2.78031
EIPR1	-0.267643	5.17353	5.0387	5.13134	5.09761	5.59544	5.34127	3.82883	5.48736	4.92884	5.25965	4.25172	5.49633	5.12887	4.44162	5.09677	5.51128	5.37643	5.40939	4.84046	5.12846	4.48864	4.88801	4.67016	4.23036
PNPLA6	-0.0969346	4.81352	5.78503	5.00899	4.45746	4.59036	4.64731	4.88899	5.35473	3.54844	4.94673	4.18428	4.72028	4.67582	4.47508	4.13093	5.73552	5.21218	4.13996	3.97085	4.68594	5.40088	6.64703	3.5656	4.89191
IFT88	-0.11823	2.81967	2.09761	2.79701	3.04439	2.55336	2.60407	3.29719	2.70044	1.41684	2.88753	2.14078	3.27053	3.05485	2.11103	2.99095	2.56071	2.60644	3.24031	1.45943	2.06695	3.33056	1.93357	2.96532	2.26003
ALG1	-0.362929	4.32265	4.80323	5.21607	4.47508	4.95606	3.83592	3	3.71039	3.48929	4.37921	2.88557	3.99548	4.66959	4.41819	4.77241	3.71699	5.26604	4.24793	3.81865	3.50208	4.35544	4.30086	3.63459	2.80735
ZCCHC8	-0.191621	4.33628	3.90207	4.74255	4.31107	4.92267	4.47184	5.75248	4.67976	4.69377	4.17951	5.1334	4.65191	4.81455	3.852	5.00899	3.62644	4.44956	5.18309	3.5373	4.24793	3.68594	4.63691	4.39025	3.80116
ABCF2	-0.221636	4.48349	4.23113	4.57954	4.27575	6.03672	4.17393	3.18745	4.3505	4.98959	3.32048	2.65764	4.61235	4.74255	4.74631	4.23573	3.7126	4.6153	4.74846	4.41414	4.14241	4.66448	3.76129	5.56773	2.41954
CHPF2	-0.168324	4.6017	4.15381	4.34837	3.8846	5.14608	3.06867	3.26153	3.79286	4.06523	3.34199	2.96532	3.08576	4.23266	4.51728	4.75862	3.39917	5.07767	4.97911	3.75596	4.13175	4.61765	3.59216	3.55459	3.30597
FUT8	0.248448	4.0036	2.79494	2.54844	3.99367	3.67243	3.73444	1.02148	4.57531	3.17313	2.02857	3.07724	4.89142	5.749	2.50589	2.488	5.00315	3.71809	4.26604	5.33985	3.22497	4.86938	4.68874	4.46074	3.34483
UBA6	0.0599794	4.34696	2.7137	2.73552	3.58015	3.37851	5.54504	2.25096	3.87283	4.21101	4.12763	3.37295	4.25323	4.51223	2.6017	3.63227	4.95466	3.73118	4.57168	3.19377	3.58856	4.9542	5.57289	3.88947	2.15381
GAB2	-0.110833	3.18269	3.20006	3.64039	4.01881	3.54967	2.73118	2.45681	3.38819	3.82069	3.91743	2.72901	2.81762	4.30232	2.69822	4.67243	3.60051	2.9279	3.31179	3.73444	3.82069	2.41143	3.05137	0.650765	3.51096
ATP6V0A1	0.167611	4.8515	3.95699	4.49185	4.63227	4.06781	1.57531	3.64386	5.21335	0.454176	4.43763	4.48671	5.53947	5.44659	2.45418	4.42694	5.27277	5.86419	5.11562	5.24831	0.263034	5.07938	5.69377	4.97865	5.60674
PIAS1	-0.209936	4.77241	4.16832	3.91743	4.51412	4.10098	4.80426	3.87578	4.34127	4.86344	4.19849	3.76447	5.09508	4.02059	3.08406	4.34341	4.55397	4.39712	4.80116	3.95977	4.86196	2.99277	4.28096	2.87381	4.33128
SLC4A7	0.00187906	3.52982	1.32193	2.58496	3.64616	2.73985	2.82375	1.42223	3.99367	3.98459	3.16672	2.07039	4.69988	3.66562	2.05658	3.20789	2.9241	2.9982	4.49249	1.848	3.99548	6.05745	2.97636	2.35332	0.782409
APBA2	0.192376	4.3978	1.8679	1.22033	3.11437	2.11103	0.163499	1.35614	5.76924	0.263034	5.43496	2.74416	5.81506	5.16471	6.06566	3.21568	4.19849	1.04963	0.124328	4.25096	4.43962	4.65478	4.63749	2.70487	3.01614
MAP2K3	0.313565	3.78031	4.8475	4.0045	4.54905	5.46467	4.03034	2.79909	4.65076	3.48414	4.85947	4.62117	4.60822	4.83744	5.71397	3.88557	4.50653	6.20887	5.2891	4.69321	5.02901	5.142	5.48768	3.90785	4.47768
TMSB10	0.349661	10.2869	10.3036	9.87352	10.2555	10.3741	10.5868	11.679	9.25319	9.65234	10.6316	10.6707	10.3034	10.817	10.8843	10.6454	10.24	11.4772	10.8477	11.6857	10.3748	13.6674	11.8522	10.606	10.5341
ASTE1	-0.0962744	2.61117	1.81967	2.31034	2.33342	2.37016	2.72901	1.59455	2.11103	2.08066	2.67582	2.42492	2.76765	2.20477	1.54597	2.46989	2.08746	3.33485	2.98914	1.96347	2.86592	2.04614	2.488	1.85599	1.5008
RNF19A	-0.339064	5.21994	3.33771	4.71918	5.07468	3.30597	3.72574	3.32337	4.37712	4.20477	4.17393	3.19535	4.48607	4.21878	4.16108	4.37156	3.44228	4.39163	4.5552	2.54597	4.68594	4.39985	3.8748	2.99277	3.11103
PEX3	0.318085	3.0197	1.82782	2.91839	2.14731	3.43296	4.0036	2.848	3.81558	3.36457	2.75275	3.03914	4.07296	3.08916	1.90304	2.69599	3.9982	4.33485	3.11103	3.0635	3.97911	2.7866	3.34341	3.46074	3.51223
GABARAPL2	0.123918	6.51869	6.17113	6.28466	6.6565	6.68018	6.21936	4.97453	6.33842	5.80349	6.4573	6.28725	6.68986	6.17393	6.33324	7.16078	6.07617	7.00023	6.85474	6.12639	5.92813	7.04701	6.91755	6.44493	6.03012
SH3YL1	-0.153025	4.33914	4.51033	4.13258	4.38059	3.15218	4.14893	3.05137	4.20633	5.31107	4.61883	3.6311	4.18903	4.21801	3.7761	4.50016	4.15381	3.6427	5.81634	4.16108	5.17273	3.88753	3.774	3.81865	2.73552
FAM136A	0.0569834	5.5656	5.7666	5.62469	5.47249	6.81096	6.38232	4.45878	5.98299	6.25399	5.53232	5.78215	6.36457	6.2447	5.27277	5.43296	6.41802	6.07788	6.28725	5.48993	6.02547	5.91241	5.91886	6.10119	5.33664
VCL	0.432979	3.84197	3.23113	3.68145	4.54782	3.32912	4.0072	2.31034	3.98823	4.19928	5.51065	4.25323	5.58105	5.55428	2.87381	5.68145	5.48993	4.36457	5.27873	3.8885	4.51412	5.82451	4.3512	3.83693	4.8525
DEPDC1B	0.0741127	4.59694	3.9514	4.06609	4.8339	4.23343	5.14486	2.87774	4.35262	4.97728	4.0045	4.10434	5.58135	4.5735	3.47768	3.94111	4.95931	4.6605	4.68986	4.28021	4.53978	4.69822	4.02503	5.16712	4.08746
NSMAF	-0.350819	6.70196	6.35032	6.78005	7.30925	4.92172	6.16249	5.44758	6.2765	6.08513	5.64039	4.72955	6.61324	5.93475	5.16108	6.50319	6.18785	6.27984	5.87848	4.86245	6.98174	4.87184	5.75382	5.60674	5.75729
ADSS2	-0.0550268	5.53792	4.8535	5.38405	6.75368	5.52513	6.0387	4.32048	5.69683	5.90689	5.04439	5.48317	6.48204	5.56894	5.16108	5.34163	6.43079	5.61294	5.75542	5.7447	5.63256	5.91217	5.00854	4.95745	4.86592
STAP1	0.579612	0.847997	0.378512	1.80323	2.488	0.799087	4.01257	1.5008	3.16832	2.98914	2.54597	3.90304	3.67129	5.72329	2.57773	1.7137	3.56438	4.57289	3.98732	3.84398	1.68257	0.0426443	4.53667	3.1127	5.52795
TIMP2	-0.133844	5.12019	3.16189	2.91073	4.29939	4.10936	5.23649	2.91456	0.555816	5.66391	4.46467	4.26754	0.263034	0.286881	4.87922	5.49281	0.799087	6.34536	4.77873	0	4.3505	6.76593	0.286881	0.344828	4.18428
RFC1	-0.07547	5.25626	4.0917	5.0197	5.41075	5.7926	5.54751	2.93734	5.19889	5.26078	4.72247	5.17552	5.68706	5.26641	4.22805	5.3565	4.6792	5.54597	5.48446	4.7339	5.67638	5.15583	4.24945	3.67016	4.6153
TBC1D23	0.364955	3.80839	3.3505	3.90593	3.88166	3.32912	4.03914	3.46467	4.40871	3.93452	3.47249	3.90304	5.45878	4.56742	3.32481	4.09255	4.46271	4.80632	4.29866	3.70708	4.04177	3.58976	4.9991	4.96301	3.88362
CUL3	-0.0875212	5.64703	5.55367	5.64414	5.38232	6.26847	5.01078	5.52732	5.62702	4.90689	5.4121	5.33985	6.41937	5.65191	4.73769	5.69516	5.89409	5.78921	4.73227	5.59276	5.06652	5.81788	5.78816	5.96786	5.24831
ZZZ3	-0.0232373	4.28762	3.43162	4.01436	3.79597	3.95233	4.42626	3.34199	4.91073	4.33485	3.68145	3.80219	5.59246	4.06953	3.27947	4.07724	4.33985	3.75168	4.28021	3.86196	4.1152	4.65478	4.32841	3.03034	3.76977
TUBG2	-0.145006	3.60526	1.36737	1.79909	3.45549	2.70266	2.42761	1.99639	3.22342	2.19219	3.13422	1.848	2.51602	0.505891	2.74631	3.1127	2.56316	3.70155	2.93357	0.83996	0.286881	3.87578	3.98094	2.03914	1.14405
RPL26L1	-0.220223	5.88362	5.91025	6.10727	5.51128	6.56575	6.53372	5.66818	5.37434	5.34873	5.79494	5.64328	5.66021	6.00607	5.13175	5.91313	5.73796	6.70901	5.79779	5.73904	5.53978	7.45179	4.83036	6.94087	4.07895
NSUN2	-0.120451	6.24336	6.28983	5.50748	5.61235	6.86814	6.24907	4.49697	6.79883	6.49985	6.99073	5.35931	7.24051	6.49921	6.39352	5.89893	7.1035	6.13278	5.97888	6.22168	5.42122	5.11312	6.46548	5.74497	5.12846
FBXO42	0.124553	3.58976	2.97636	3.01792	3.49697	2.81147	3.28096	3.23726	3.39094	3.43296	3.43296	3.34908	3.80323	3.21101	3.75168	3.69711	3.46336	3.46597	3.58856	2.86394	3.74093	2.926	3.18269	2.67582	3.53232
MFAP3	0.0934369	3.25701	2.28392	2.9542	3.14893	3.30012	4.00899	1.57531	3.3978	3.11936	2.82171	3.50716	4.1152	3.62293	2.53605	3.61941	3.57046	3.19377	4.33914	3.64731	2.85997	3.42761	3.31325	2.59694	2.34483
MRI1	-0.343097	4.17073	5.16672	5.18706	5.29205	4.25248	4.74578	3.13422	3.75275	5.04002	4.50843	4.1416	3.39643	3.84097	3.89045	4.9486	4.48156	3.75702	3.66562	2.60881	4.37016	4.66676	5.10978	5.34021	2.53356
METTL1	-0.536921	5.1635	4.89821	4.91886	4.03386	5.34696	4.81506	5.20124	5.51159	4.44029	4.79597	4.03298	5.28836	4.91121	4.60763	4.47508	4.70819	4.41007	4.72137	4.48027	4.62469	4.07125	5.05007	4.59335	2.72683
AGA	-0.138691	5.24982	3.07039	4.65878	4.38059	4.19219	3.34056	3.85	4.57107	3.65191	4.91169	4.4019	3.58135	5.16993	4.74093	5.38336	0.978196	4	5.24717	4.52105	5.14934	4.10601	4.17792	2.72247	3.41684
PI4K2B	0.0888101	4.16108	3.07724	3.6017	3.72028	4.33628	4.09424	2.15056	3.93734	3.91934	3.57531	4.24793	4.57107	3.55827	2.47768	4.04352	3.53605	3.54102	4.97499	3.55827	4.79805	4.21801	3.0268	3.60763	3.9982
BOD1L1	-0.390319	4.67525	4.13586	4.12928	5.18943	5.17033	4.60644	3.15056	4.77821	4.86938	4.42425	3.94486	4.85549	4.59036	3.94486	4.84649	3.60881	4.54597	5.19653	3.6792	4.15785	3.97545	3.64155	3.50589	3.14241
MAT2B	-0.0614849	5.70901	5.44328	6.09656	6.00203	5.75302	6.22207	3.77926	5.62264	5.916	5.22805	5.5741	6.21451	5.99005	5.74174	5.66874	5.59813	6.06781	6.55995	5.70404	5.52293	6.1639	5.37678	5.81121	4.69209
EDC4	-0.254153	6.17413	5.93546	5.71973	5.615	6.65033	6.52998	4.36107	5.42928	6.00045	5.76951	4.52857	5.37191	6.0018	5.57501	5.7211	5.91241	6.16209	6.01436	5.17513	5.99209	6.00473	6.33485	4.98823	4.98459
TRIO	0.232787	2.41143	3.22188	0.613532	1.32769	3.02148	5.66505	1.75702	4.7866	6.1416	5.79286	3.83996	4.99277	4.42156	3.71918	2.46989	5.06781	1.1375	0.163499	4.0365	4.47897	5.42156	5.21956	0.807355	4.95838
CLEC16A	-0.01755	3.80839	3.30159	3.14731	3.64155	3.02857	2.49057	2.75275	3.28244	2.55336	3.24793	2.58976	3.26003	3.66903	2.93357	3.46467	3.32912	4.13668	3.78031	2.68257	3.29572	3.58976	4.26454	3.07553	2.76341
MTREX	-0.0456805	5.48704	4.73335	5.33914	5.22304	5.27053	5.65392	4.54967	5.51223	5.64703	4.81096	5.07211	6.29076	5.81275	4.37365	5.18943	5.23419	5.16108	5.31216	5.15299	5.08406	6.24031	4.86493	5.15502	4.96023
ZFYVE16	0.142644	2.61589	1.7137	2.02857	3.42761	2.27202	2.42761	2.65992	2.53605	3.32337	2.9782	2.66448	3.34056	2.24184	2.1635	3.72465	3.14731	2.27798	3.36177	2.28392	2.20477	3.74739	2.33056	2.76977	1.98914
RIPOR1	0.232643	4.45746	3.82883	2.36737	2.80116	3.25248	4.12598	1.87971	4.94298	3.07553	3.62761	3.12102	4.9542	4.33985	3.86394	3.44095	5.07639	5.02326	4.67976	4.08066	4.25852	5.09043	5.81532	3.23266	3.00899
PNKP	-0.354794	5.63256	6.16088	5.7845	5.67723	4.48414	4.51159	4.23496	5.78686	4.57531	5.14037	3.97269	4.86641	5.90472	4.7339	5.48832	5.76527	5.18785	6.21839	4.1375	4.90352	4.29131	5.72301	4.57046	4.0036
SPDL1	-0.295211	5.51885	4.59753	4.9222	4.96855	5.03826	5.46695	3.41278	5.03474	4.83895	4.31832	4.34625	5.749	5.21412	3.72028	4.80993	5.74066	4.17153	5.64184	4.34696	4.80374	5.82629	4.16752	5.33593	2.61589
STAU2	0.00368477	4.91982	4.29278	5.41312	4.91456	4.22805	4.26078	3.55213	5.32697	4.14812	4.59991	4.1375	5.71864	5.00495	4.10014	5.69516	5.17393	4.72192	4.99684	4.71809	5.15866	4.29866	4.79077	3.67469	4.62469
SLC66A1	-0.309473	5.14771	5.20203	4.95187	5.89312	3.28244	2.95606	5.31216	2.82375	3.60288	5.37016	2.41954	2.42223	3.83794	5.23036	5.73931	4.48027	3.26604	5.19849	2.64386	3.87381	3.77294	3.96993	3.19219	3.86295
CTNS	0.278253	2.3505	2.99639	3.29866	3.28983	2.51096	2.61589	1.7137	3.15704	2.81762	2.69153	1.69599	3.02503	3.67016	2.49313	3.00899	3.25096	3.18587	2.93923	2.82985	2.62994	2.46728	3.90497	2.87971	3.59694
PHF23	0.105516	4.06264	5.26416	5.16148	4.87135	4.9222	4.60288	4.17313	5.01033	4.36877	4.42156	3.39369	5.49921	5.55182	5.43296	4.20163	5.46858	4.34199	5.06307	4.81813	4.46336	5.12887	5.82782	5.08916	4.3067
INPP4A	-0.252122	4.50016	3.11103	2.62527	4.45615	3.92979	2.20789	2.20789	2.88753	2.85997	3.40599	3.06178	2.85997	2.83794	3.62059	4.01078	3.91456	3.50716	4.82426	2.03562	4.18666	3.76129	3.54844	1.69599	1.33914
PSMA4	0.0298434	8.33619	8.31016	8.77604	8.02652	8.99786	8.99907	7.56117	8.55785	8.60622	8.30163	8.28951	9.36739	8.51487	7.5345	8.44774	9.52681	8.56777	8.48595	8.89887	9.42301	8.04778	8.8605	8.49805	7.8849
LSG1	-0.222718	5.50621	4.88215	4.82629	4.87135	5.11437	5.6427	3.61117	5.49633	5.06695	4.89821	4.66903	6.03518	5.16511	3.48414	6.00921	6.31089	5.57652	5.46401	3.96993	4.76394	4.74147	4.88947	4.22805	3.63807
PARP3	0.0342252	2.99458	2.80116	2.79701	3.0018	3.58976	3.70598	2.38405	3.0018	1.99639	3.926	3.43429	2.49057	2.73985	3.67129	4.0036	3.55827	4.53605	4.51412	2.59455	4.98778	4.45352	3.74416	2.47508	0.773996
THAP3	0.0645658	4.1035	4.12102	3.79286	2.85798	3.82883	4.15462	3.92695	4.37016	3.8125	3.07895	3.70155	4.69822	4.01703	4.24717	3.46728	4.18666	3.90689	3.16027	4.1819	4.37851	4.55827	4.08406	3.83996	3.83592
TDP1	-0.0606757	4.88899	4.56621	4.39025	4.97545	5.0321	4.76765	1.83996	4.61235	4.51728	4.59216	4.35473	5.09677	4.99503	4.50016	4.67638	5.45319	4.48736	5.08534	4.74846	4.97911	4.25475	4.74524	4.65421	3.34341
MED17	-0.234365	3.99458	4.08151	3.91648	4.11437	4.8535	3.44095	2.66221	3.71589	4.35755	2.75916	3.32337	4.82629	4.26303	3.61353	3.75916	4.15704	3.61706	3.18269	4.22188	2.82171	4.23955	3.75596	3.68257	3.13586
RETSAT	-0.00185839	3.03914	3.60526	4.36247	4.2426	3.43563	3.58736	3.62877	3.77083	4.22497	4.1152	3.49953	3.53605	3.84599	3.49185	3.9991	4.34483	3.14405	4.46401	4.43229	3.9607	4.81404	3.36457	2.44361	3.1811
CAPG	-0.142578	8.08847	7.29186	7.62022	7.97321	7.80096	1.73985	7.08428	6.24963	0.669027	7.81083	7.6659	4.30159	4.44758	9.3242	8.86601	4.63285	7.91253	8.71613	5.70293	9.85723	1.0072	5.11228	0.678072	7.57008
AP2S1	-0.213878	7.83112	8.61261	8.07452	7.17911	9.24084	7.88527	6.33985	7.52849	7.02436	7.48824	6.45796	7.35147	7.11197	7.07895	7.31161	8.10617	8.12216	8.11702	7.64681	8.0486	7.09782	8.201	8.06215	7.19751
DCUN1D1	0.0590682	3.77716	2.94486	3.27501	4.62176	3.49825	4.6427	2.22651	4.55152	3.84599	3.35896	3.74739	5.46303	4.88215	2.17632	4.0009	5.55367	3.87283	4.20398	3.66107	2.76129	4.14812	4.43696	3.74846	2.86394
JADE2	-0.0916699	3.43029	2.85997	3.25096	3.93357	4.23649	3.9514	1.5509	2.92979	3.81352	3.87578	3.39643	2.9241	2.848	3.3799	3.58736	3.92505	3.83289	4.46401	2.76553	3.64386	4.72901	3.07553	1.5509	2.44095
LCP2	0.00401495	6.44907	5.2114	5.52136	6.58045	5.33842	5.68229	4.73985	6.7849	4.9241	6.11228	5.63372	6.71905	7.3733	7.15421	6.56346	7.18834	7.51956	7.31288	6.6097	6.40412	0.0285692	6.26078	5.45746	5.07468
TRIT1	-0.281495	6.39438	4.10852	4.17313	4.3799	5.07253	5.17153	3.53481	5.6094	4.84449	4.3875	4.52857	5.85075	5.0268	3.9644	4.24489	4.76924	4.42694	4.6893	4.76022	5.24603	5.13422	5.13914	5.16148	3.13422
CUL7	-0.027311	4.66334	3.29866	3.89724	4.66903	3.73335	3.3505	3.23726	4.2854	3.61353	4.06091	3.26754	3.60526	3.30743	4.06867	3.51979	4.47379	3.84097	4.46858	2.85997	5.44659	5.45385	4.63169	3.3799	3.24793
CTNNA1	0.0353419	5.82833	5.48961	4.33771	5.57077	4.95187	6.21043	4.10518	6.02237	5.86567	5.5744	3.0635	6.38974	6.46418	5.749	4.75702	6.24888	4.59036	5.97154	5.82731	4.76288	7.57387	5.9486	5.29131	4.66107
PHKA2	-0.111668	4.3978	4.2817	5.06781	5.00764	4.83895	4.49057	4.34412	4.59753	4.63401	6.32445	3.99095	4.57046	4.57894	4.26529	6.30506	4.61824	5.337	4.98959	2.67129	5.99277	3.58015	5.49729	4.73769	2.91456
CNTLN	-0.113324	3.60644	1.9855	2.22342	3.38681	3.32193	2.55827	1.58976	4.89239	1.848	1.08406	3.40735	4.98823	1.53605	1.68706	2.79286	2.27202	2.75702	4.22651	1.8679	2.78031	3.12433	2.30451	2.24184	2.22651
HSPA5	-0.275257	9.05921	7.678	7.60222	7.24003	8.40697	7.5585	6.01569	6.5694	8.4573	7.98527	6.72697	7.63771	7.66754	6.69613	8.55513	8.47058	7.61802	8.00591	7.64299	7.17063	8.91546	7.58534	6.96636	6.32085
GEMIN8	-0.214987	3.54102	3.74093	3.58015	3.96532	3.74201	3.16993	3.10266	3.08746	3.22959	4.71534	3.47768	3.10266	4.05224	3.74631	3.80941	2.81558	3.86394	3.63923	3.43696	4.37016	2.99639	3.94673	2.95791	2.41954
OFD1	-0.152163	3.8268	4.58376	3.8166	5.07211	4.26228	3.40327	3.64731	3.47249	3.44493	5.76261	3.73444	3.6311	3.59932	2.43029	5.09001	2.9279	4.24641	4.06523	2.61824	4.34554	2.96717	5.48349	4.52105	3.13422
WDR37	0.0518804	3.07211	3.7301	3.54226	3.7666	2.53605	3.70155	2.84398	3.56925	4.21568	3.55213	2.26303	3.42089	3.06523	3.50843	3.71809	4.29499	4.22419	3.75489	2.70708	4.24945	2.46989	3.55704	2.36177	3.72247
YTHDC2	-0.414315	4.07724	3.33342	3.69377	4.63865	3.2854	4.23113	2.87971	3.86592	4.46009	3.58856	3.28392	4.02148	4.13668	2.61117	3.55213	4.29793	3.58616	4.02237	2.63923	3.79077	3.99729	3.46728	3.01436	1.46467
CTPS2	-0.0362277	3.27798	2.55336	2.69599	3.20477	1.83996	0.0285692	3.48671	3.06005	3.4489	4.29646	2.95791	3.11103	3.84398	2.44361	2.68706	3.49185	2.29572	0.0285692	2.40871	2.34199	3.3799	3.65076	3.47638	2.04963
ATP6V1H	0.0510555	4.58075	4.749	5.60555	5.12639	4.72955	4.40463	5.98914	5.00495	4.64328	5.75355	4.17552	5.47054	5.10266	4.749	5.73173	4.79649	5.51948	4.34127	4.34056	5.1127	4.20789	5.0148	5.14649	5.35297
POLR2B	-0.176052	6.21296	5.62907	6.04505	6.2426	6.50303	8.41945	4.69933	5.89312	7.42105	5.59783	5.55643	6.45878	6.32715	4.9814	6.11312	6.54257	6.19417	5.96278	5.86716	5.80168	5.71617	6.4358	5.98823	5.33128
FAM214A	0.455272	2.69153	2.05311	2.51854	3.16672	2.93923	2.95233	3.73552	3.60881	3.73227	2.66221	3.38819	4.1819	3.76977	2.36177	3.46858	3.05658	2.65306	3.47379	3.30159	3.52482	2.1635	4.59932	3.25701	4.11437
TPR	-0.318491	6.35403	5.16027	5.11103	6.34926	4.89045	5.59455	4.94813	5.84373	5.83466	4.65764	4.72083	6.62147	5.46989	5.30597	5.00809	5.70155	5.67835	5.29609	5.49217	5.54504	5.03694	5.38785	4.89966	4.69711
KIAA0556	-0.223893	3.23419	2.0635	2.5509	2.55827	2.49313	1.88362	1.93734	2.33628	1.71809	2.88362	2.82985	2.53356	2.92979	2.03562	2.43296	2.11103	2.93734	2.55827	1.64616	2.76129	3.44095	2.88947	1.7866	1.3505
DTNBP1	0.445447	3.13093	3.54597	4.27128	3.848	4.64904	4.34979	3.64962	4.76553	3.57894	4.50653	3.73118	4.51854	4.58015	3.9542	3.84699	4.33342	5.57743	4.81096	4.29719	4.23343	4.37086	3.82171	4.44559	4.37921
C12orf4	-0.0726	2.91265	3.11936	3.55582	3.43962	2.91648	3.29719	2.68482	4.30816	3.60999	2.73552	3.29719	4.70321	3.60881	2.48027	3.3799	2.98914	3.72574	3.95513	3.10098	2.88753	3.07382	3.80426	3.18269	2.14078
MAP4	-0.0936548	5.26078	4.64789	4.7761	4.87676	5.59096	5.84499	3.849	5.22497	5.58946	4.73931	4.10685	5.52576	5.63981	4.80684	4.88753	5.53076	5.51633	5.91385	4.90111	5.82094	7.01881	5.44394	4.18507	2.96532
GOPC	-0.331995	5.48929	3.45418	4.67582	4.92267	4.78241	4.69933	3.8846	4.5735	4.59753	4.10014	4.0993	5.28836	4.45878	3.45286	4.46923	4.69488	4.49057	5.15015	3.57168	4.53854	4.54226	4.50526	4.40395	3.29866
USP28	0.272315	3.03034	2.59932	2.80116	2.67356	4.7301	4.19061	1.08406	2.95233	2.39506	3.02503	3.08066	3.93829	3.74739	3.32193	2.1177	5.01346	3.65992	3.91552	4.22728	4.37851	4.58015	4.10266	2.75489	3.02148
HDAC9	-0.378782	4.97865	1.81558	4.75221	4.55704	2.93734	0.389567	3.73769	0.176323	2.45154	4.44228	0	0.15056	3.21257	2.72901	4.52669	0.0703893	2.32769	3.66903	1.65992	0.238787	3.80839	0.111031	0.137504	2.17313
TSPAN17	-0.0642247	4.50271	3.80323	2.9279	3.1811	2.21412	3.08576	2.01078	3.0268	3.24945	3.60051	3.1127	3.24945	3.76235	3.03738	2.97269	3.848	4.35262	3.86295	3.04264	3.81044	5.59872	3.90014	4.47184	1.18903
NOP16	-0.41518	6.5941	6.91946	6.98504	5.8268	7.35438	7.02436	6.35421	6.26641	6.4522	6.15502	6.05441	6.52544	6.37851	5.91169	6.32553	6.86208	7.14547	6.1819	6.37782	6.3651	6.71946	5.23802	7.67751	4.11936
RRM2B	-0.363655	3.97085	4.26078	4.94064	5.18982	3.48671	3.87184	2.81967	4.03738	2.46205	2.57289	3.16027	4.73931	3.44758	3.1811	4.28836	3.74416	3.27947	4.14323	2.96901	3.24945	4.52482	3.45681	3.34908	2.9486
ZNF800	-0.0467018	3.36877	2.8953	2.97636	3.25852	3.70819	2.72901	2.35896	3.26303	3.21723	1.85599	2.63923	3.79494	3.31325	2.41684	3.0018	4.16511	3.22188	3.82477	2.66676	3.21101	3.12433	2.73335	3.6565	2.44095
MRPS10	-0.183606	5.78921	5.11187	5.74255	5.37295	5.26828	5.07039	4.76235	5.39609	4.99458	5.29609	5.27798	5.95907	5.04089	4.42492	5.48832	5.30634	5.32337	5.63691	5.40224	6.29939	5.51286	5.29425	5.09803	4.7126
RSF1	-0.0605091	4.71699	3.56803	3.94579	4.71149	4.83996	4.70044	2.48543	4.30305	4.48671	3.60526	3.31759	5.07382	4.6241	3.63923	4.23573	5.33485	4.18982	4.72955	4.70321	3.76022	4.54659	4.90737	3.54226	3.32625
VPS13D	0.206475	3.46989	2.87578	2.73335	3.47379	3.21101	3.95791	2.26604	3.57531	3.76022	3.18903	2.87184	4.07724	3.63575	3.10434	3.3505	3.87578	3.75168	3.78973	3.36597	3.88655	3.63459	3.69377	3.19849	2.91456
CELF2	-0.127928	4.88947	4.95327	4.8485	5.39643	4.75649	6.27184	3.47897	6.33324	6.50192	4.86493	4.06437	6.87774	6.66761	4.44427	5.22033	4.76129	5.30597	6.11061	5.17193	4.63807	0.0703893	4.75916	4.35262	4.62469
FAM120A	-0.302323	5.94298	5.32984	5.41718	5.76845	5.53605	6.28151	4.33985	4.85649	5.68762	5.58165	4.72083	5.60792	5.93993	5.17513	5.54566	5.78581	5.66988	6.14078	3.65764	5.66477	6.20555	5.19731	4.54288	4.11437
R3HDM1	-0.0455426	4.71094	4.18824	4.56316	5.00045	5.28355	5.76394	3.29278	5.29499	5.17313	4.11437	4.27202	5.74927	4.91886	3.82273	4.8125	6.00675	4.92552	5.6014	4.05398	5.03606	5.21878	5.00809	4.16993	3.69822
COL9A2	-0.466993	8.49589	3.83996	3.07039	5.44526	0.475085	1.51602	4.19219	4.27501	2.65992	4.77821	4.82883	2.04614	2.03914	1.48543	5.02059	1.25701	4.2817	3.20633	2.59694	5.07425	0.687061	2.26003	0.189034	2.42223
ERCC8	0.0753277	3.26454	1.97453	2.65076	3.41819	3.48543	3.65076	2.14078	3.20789	3.74416	3.10601	3.13422	3.848	3.69265	2.30451	2.7845	3.83188	3.15866	3.70819	3.31034	3.00899	4.09424	2.71149	3.52732	2.10769
H6PD	0.033788	4.24184	1.32193	2.7866	2.99458	2.79494	1.84398	1.57531	0.0840643	2.01792	3.89045	2.63691	0.0285692	1.56071	3.98732	4.52669	2.66903	2.12433	4.66334	0.454176	4.29278	4.49889	3.12433	1.29278	2.40054
VAMP3	0.447025	4.80735	3.84699	4.17473	3.14405	4.46401	5.12474	3.32625	5.38509	4.72846	4.22265	3.69265	6.10832	4.58736	4.47962	5.03034	5.62994	5.17433	5.45516	5.59066	5.65992	6.40803	5.70515	4.60703	4.8475
RCN1	0.00329613	5.44261	4.26228	4.12928	5.29609	5.40973	6.11145	5.56133	5.36457	5.7271	5.63633	4.52042	5.90231	4.8334	4.80168	5.58586	6.1079	4.42358	6.32247	4.15056	4.86443	6.68846	6.31397	5.65878	3.51602
RFC2	-0.0465354	5.62585	5.55059	5.41886	5.44857	6.67214	5.31651	5.55182	5.39643	4.89433	7.39857	6.26247	5.64789	6.01814	5.94509	5.72792	5.33628	6.09107	6.853	6.39866	6.11228	5.61706	5.62469	4.81967	4.59574
ARID1B	0.0401179	5.4489	3.81044	4.74524	4.87234	4.80168	3.74201	3.26454	5.01837	4.69933	4.08151	3.36036	5.04658	4.85947	4.29205	4.50398	5.05311	5.06695	5.09592	4.30889	5.27575	4.42559	5.50016	3.97545	4.55459
CLPTM1L	-0.173767	7.33324	6.29664	6.15644	6.39077	7.00124	6.88716	4.33485	6.8505	6.57713	7.36475	5.4957	6.88191	6.30998	6.68229	6.39763	6.99537	6.23304	6.61014	6.82413	6.1643	5.93452	6.48382	6.66149	5.74201
NEDD4L	0.290082	2.76553	0.344828	0.356144	2.70487	1.04264	0.475085	2.03914	4.40735	3.54967	4.75542	0.0426443	4.07382	3.98641	3.94486	1.40054	4.51033	3.81455	3.72574	2.45418	3.23726	3.8125	5.31216	3.93074	0.0426443
HEXB	0.00524193	7.70812	5.84398	6.39506	7.21393	4.43095	5.69627	6.78542	4.74524	5.80452	7.17602	6.67285	4.7939	5.14078	5.49697	8.21931	5.47411	7.02081	8.11967	4.80012	7.40914	8.2254	4.72356	5.26828	7.15401
PTCD2	-0.27495	2.78031	2.11437	2.69599	2.73335	2.90497	3.73985	2.11437	2.79077	2.99458	2.45943	2.20163	3.43429	2.94486	2.15381	2.87381	2.95977	2.12102	3.04089	1.63227	2.85	3.6241	1.98914	2.15056	1.27501
JKAMP	0.0374369	5.24146	4.78869	4.79753	5.05398	4.91313	5.22419	2.34483	4.04876	5.02813	4.5552	4.78031	4.87627	4.79286	4.32193	5.37539	4.3875	5.13175	5.02724	4.49442	4.09677	5.3799	5.21723	4.66846	5.03078
NFE2L3	0.150968	2.74416	3.28983	2.0321	0.956057	3.58256	3.73985	1.45418	2.52105	3.48671	3.09085	2.02503	3.19849	4.03122	1.25096	2.90497	3.66562	3.28983	2.19849	4.22728	3.02148	3.72683	4.27053	3.5656	1.94486
MCUR1	0.127154	2.72028	2.96162	3.34908	3.13093	4.52419	3.85898	5.13996	3.75168	3.21568	3.23879	2.83996	4.25096	3.41143	2.5509	2.93546	4.77663	4.52231	3.89821	3.86394	2.55582	3.08406	3.7666	4.78869	3.11103
LIMA1	0.10646	3.83086	2.69599	2.97269	4.23802	2.41684	3.40463	1.94111	4.31759	1.9855	2.63923	3.48414	5.84875	4.24717	1.85997	3.5435	4.23802	3.97453	4.78084	5.12226	3.93546	3.58135	4.80839	2.3978	2.17313
LETMD1	-0.0640924	5.54473	5.92267	6.16571	7.14231	5.77742	5.86245	5.46434	6.5051	6.42475	5.97361	6.30104	6.25191	6.47362	5.9644	6.49889	6.38111	5.90135	6.4573	5.65363	5.99005	5.50112	5.64414	5.63749	5.63256
MAPK9	-0.238316	5.03518	4.0036	3.52857	4.37016	3.89821	4.6311	2.32769	3.80426	4.53294	4.22651	4.36667	3.9514	4.1375	3.81865	4.39985	4.18745	4.40327	5.1334	3.3505	4.10769	4.7301	2.81352	3.25701	3.17313
COL23A1	-0.043884	4.46728	3.32481	4.16832	3.66789	4.27426	0.0285692	4.01614	0.831877	3.68482	5.93192	3.17792	0.903038	5.04308	3.85699	4.59932	5.00495	5.93475	0.163499	5.08534	0.201634	4.52293	4.43095	1.28096	3.67582
FAM160A2	-0.141774	5.13011	3.84097	3.87086	5.68706	4.18824	3.35473	4.19535	2.77189	4.05224	4.61648	4.09845	3.0321	3.81865	4.73173	5.05745	3.60644	5.62615	4.56071	2.70487	3.91169	3.87184	4.10685	3.70929	4.09677
HERPUD1	-0.18119	5.615	5.7926	5.25248	5.18507	5.15826	3.70708	5.82018	5.24907	3.36597	5.10685	5.50526	4.8846	5.88069	7.17572	6.08385	4.59335	4.16912	6.34572	4.98231	4.73552	5.87135	5.19456	4.65363	3.43696
HOMER3	-0.122336	6.42576	5.82782	5.86938	5.87012	7.14761	5.31542	5.6851	0.356144	6.6091	8.66338	6.02813	0.163499	2.91073	6.64429	6.63067	4.11686	8.34456	7.36606	0.659925	7.51609	5.86666	2.1635	1.90304	7.00899
RAD51	0.0876406	4.89579	4.80478	4.77083	4.64731	5.23993	4.6792	3.50335	4.85649	3.43696	5.04089	4.45418	5.77136	5.24451	4.82375	5.12681	4.70099	5.31615	5.78999	4.77768	5.52168	3.74416	4.68145	3.92315	5.07425
POLQ	-0.477732	4.17712	3.25399	3.05137	3.75382	3.51475	4.0045	2.57046	3.20789	3.63459	3.45022	2.65535	3.68818	3.53481	2.35332	3.53232	2.90881	4.09424	3.7666	1.76553	3.49825	2.49057	3.66789	2.21412	1.60407
PIK3CB	0.27298	5.36702	4.31759	4.47703	4.98003	4.72792	4.54164	3.26303	5.01123	4.22651	4.81916	4.05311	6.31016	5.57682	4.40939	4.60407	5.58015	5.61765	5.03078	4.83441	3.92979	4.04876	6.05658	5.02281	6.01614
CYBA	-0.338013	9.66484	9.64938	9.44189	8.60266	8.84521	8.69929	8.931	7.21917	8.54187	9.01837	8.09961	6.21354	7.17343	8.81804	9.09887	8.51515	9.12771	9.22622	8.68832	8.00994	1.07724	7.43638	7.86635	8.27044
THOC3	-0.241519	6.11103	6.49937	6.05159	5.51349	5.36562	6.23362	4.05658	5.82579	5.63894	6.26247	5.06393	6.77597	6.43879	5.63604	5.44857	6.25814	6.31922	6.91433	5.8125	6.10161	6.04527	6.1418	5.23458	3.54473
HEBP2	-0.264718	5.29756	4.04614	6.13196	4.90641	4.72846	3.05137	7.86697	4.27352	2.69822	4.97361	3.32625	3.83592	2.71149	5.21956	4.54597	4.09845	5.84875	5.29939	1.38405	4.82883	4.98732	2.81967	4.72356	3.77189
MPHOSPH9	-0.424488	4.88996	4.05311	4.28318	5.64097	5.32984	5.98982	3.16993	4.93168	5.36036	3.8679	3.83693	5.66534	4.87823	3.5373	4.3799	3.51854	4.10601	4.93074	3.20945	4.16752	4.13996	5.24907	2.85798	2.51349
SIKE1	-0.122162	5.19692	3.59096	3.99729	3.92029	4.53543	4.60999	3.18269	4.72629	4.32984	4.22188	4.4019	5.08704	4.60526	3.50589	4.07895	4.52231	4.2149	5.43896	4.08916	5.10098	5.30012	4.94767	3.75275	2.63227
RRP12	0.0513677	3.90977	4.6605	5.10434	4.59574	5.54936	5.11145	5.12143	4.86888	5.46074	4.22882	4.15462	4.84699	4.87873	4.71205	3.48285	5.62819	5.48285	4.76341	5.05137	4.77136	4.64328	4.73227	5.3844	4.28688
FNIP2	0.372909	2.07039	0.411426	1.32193	2.49825	0.604071	1.82782	0.956057	3.03386	2.11103	1.90304	1.94111	3.44758	2.93357	2.02503	2.50589	2.73552	2.7761	2.28392	1.79909	2.93357	1.8953	3.03914	0.871844	2.05658
MSMO1	0.190445	4.9331	4.96578	4.15947	3.89724	4.3512	4.99186	2.27501	3.44095	5.32912	4.37086	3.66789	5.10182	3.15381	3.4957	6.29499	4.51475	5.29315	4.52168	5.92837	4.90545	4.97177	5.72247	3.91169	5.14445
TTC17	-0.210249	6.13976	5.17313	5.54967	6.62542	4.53792	5.11437	5.41481	5.59066	6.25115	5.47054	5.65277	5.31506	5.62088	5.06695	6.57107	4.93829	5.57592	6.15725	4.65134	5.41954	4.62293	6.19987	4.52669	5.09761
FOXN3	-0.0309084	4.30451	3.20945	3.71149	4.90063	3.42626	3.78136	1.73552	2.88166	4.8674	4.34767	3.65306	3.24793	4.32337	3.90785	4.17792	4.25927	3.69153	4.59932	3.80323	3.93263	2.27798	4.23266	2.96347	3.47249
AKR7A2	-0.260197	6.15401	6.44824	5.92647	6.19298	4.69822	4.78869	4.38267	4.82273	5.0781	6.83137	4.40054	5.24527	5.47249	5.88704	6.98231	5.85773	4.61706	6.36859	4.95745	5.47444	5.59305	5.3302	4.21878	4.79129
MRTO4	-0.308688	5.90328	5.80219	5.84373	5.29902	6.04505	5.95443	5.46826	6.23458	5.83744	5.24603	4.87381	6.73376	5.91528	5.23189	5.27314	6.93499	5.99141	5.41954	6.17891	5.76633	5.46009	5.54473	5.98003	3.65421
USE1	-0.308091	5.90569	6.32067	6.4219	6.27817	4.60822	4.83441	5.67807	5.70072	5.29719	5.50335	5.97407	5.2791	5.51412	6.5529	5.55029	5.85972	4.78555	5.75462	5.01837	6.02857	4.84097	5.07468	5.2891	5.47897
AP5M1	-0.0438683	4.05485	3.24336	3.94673	3.65764	3.77083	4.26303	1.5656	3.56803	3.90014	4.0036	3.52982	4.02326	4.42761	2.26003	4.24717	4.56194	3.93074	4.82069	3.16832	3.75702	3.33485	4.44294	3.5741	2.61589
ANAPC4	-0.472078	4.99095	4.32769	4.58676	4.82731	5.21529	5.02459	4.08831	4.58616	4.88118	4.5008	4.21723	5.19417	4.48414	3.27947	4.72792	4.28762	4.90545	4.69766	3.27798	5.05615	3.98914	3.65878	4.01614	3.53107
TRAPPC3	0.0917571	5.82477	5.96232	5.69738	5.48704	5.80038	5.99797	5.02813	6.14445	5.48704	5.54226	5.4121	6.5108	5.90328	5.02459	5.65964	5.52042	5.97269	5.92529	6.25512	6.20065	6.25758	5.81865	5.63023	5.85225
THRAP3	-0.00370021	6.17093	5.48414	5.63952	5.88679	6.15826	6.24298	3.88947	6.21897	6.36492	5.65163	5.32984	7.00101	6.33056	5.52042	5.6792	6.2651	5.86716	6.14119	6.49937	6.2604	5.90448	6.57803	5.17193	5.03518
PHPT1	-0.387882	7.76904	7.68874	7.09032	6.83555	6.93934	7.36448	7.78601	6.46744	6.67906	7.11249	6.50653	6.19377	7.45869	6.97315	6.98607	6.44543	7.38293	6.60422	7.45401	6.11187	6.54442	7.40812	8.09122	6.12288
LY75	-0.368208	4.13914	2.28392	3.51223	4.94533	2.81967	2.95606	2.50589	3.60407	3.99548	4.07211	4.02237	4.1914	0.0426443	3.27202	4.41143	1.23266	3.39094	5.19928	2.52607	2.31904	0.0143553	3.1635	2.01792	0.111031
ARID4B	-0.134631	4.58135	3.11437	3.11437	4.95791	3.36737	3.47638	3.49953	3.87971	4.07553	3.22497	3.57168	4.35191	3.95047	3.70819	3.73552	4.04352	3.35614	3.7666	3.91361	3.49953	3.08066	4.27352	2.85798	3.68594
OPN3	-0.206725	3.69377	5.70901	3.62761	4.337	2.38957	2.51349	2.27798	1.66903	2.82985	3.74093	3.14241	1.65076	2.85798	4.75489	3.81558	3.21412	1.65535	4.38543	2.53854	4.28836	3.07724	1.73552	1.74846	4.04789
SDCCAG8	0.10033	5.64616	3.0635	3.50589	5.16148	3.37573	4.15137	4.34199	4.18666	6.15239	3.8953	4.65935	4.07211	3.79181	3.79909	3.77821	5.03826	4.01436	4.22497	4.84398	4.07553	5.46956	4.16027	4.05745	5.23036
KIF1B	0.384764	2.45154	0.85599	1.11103	1.40054	2.44095	0.389567	1.04963	3.32048	2.48285	2.54597	1.69599	4.18349	2.59694	1.4489	2.09424	3.94298	2.55582	3.26003	2.42492	3.21878	4.37712	3.58976	2.30159	1.65992
TBC1D22A	-0.198117	3.44493	4.01703	3.60288	3.9241	3.34483	3.74201	2.19849	2.99095	3.57168	3.77716	2.52857	2.81352	3.98003	3.82273	3.60644	3.47379	3.72574	4.0321	2.98368	2.42492	2.83794	3.70929	2.46728	3.36177
FAM168A	-0.0265535	3.60763	2.73335	2.38681	3.70708	2.91265	3.60999	1.93734	3.19535	3.41278	3.52857	2.65306	3.60999	2.93168	3.8679	3.27947	3.40735	3.32337	4.04089	2.774	2.59216	4.47573	3.22497	1.96717	2.44095
RELT	-0.0856351	4.61648	4.41752	4.06437	4.30889	4.24717	4.09592	3.17951	5.03386	3.83794	4.85	3.70044	4.67582	3.7301	4.2817	4.49633	4.61648	6.06803	4.92647	3.78869	3.65878	2.7137	4.67976	2.28392	4.54102
GALC	0.0189174	3.88655	2.95233	2.93168	5.07382	1.51096	2.99639	1.77821	4.76235	2.68032	4.57289	3.64039	4.32912	5.05441	3.43429	4.04439	3.66903	2.926	5.37643	5.58225	3.23573	3.36877	5.4192	4.61648	0
NOP58	-0.242901	6.95884	6.64587	7.17253	6.63793	7.57221	6.82795	6.89857	7.57099	7.28512	6.65148	6.71411	8.07302	7.24878	5.69683	6.57969	7.35279	7.06824	6.68608	7.25503	6.68243	6.93062	7.22795	6.81916	5.78607
SZRD1	0.11241	6.1815	5.64731	5.67186	5.55888	6.2213	6.11124	4.45352	6.63952	5.6094	5.8679	5.66903	6.89118	6.16229	6.10371	5.96786	6.59798	6.64515	6.28817	6.56864	6.20006	6.81519	6.5127	5.34305	5.05355
KCNH2	0.143623	1.774	0.765535	0.722466	1.0635	5.04789	3.18587	1.20789	6.28244	0.0426443	0.0840643	0.226509	5.55182	7.67433	0.0703893	3.9279	5.86096	0.344828	0.378512	6.17033	0.555816	0.124328	6.35226	6.95931	0.226509
CUL1	-0.0260644	6.20906	4.01436	5.02813	4.58015	6.0237	4.85848	3.47768	5.22381	5.732	3.63807	3.70598	5.93026	5.44029	4.47703	5.40633	4.85997	4.61765	5.31976	5.04308	5.50779	5.52951	4.9472	6.14425	4.42962
FAM114A2	-0.0226156	3.88264	2.93734	3.76129	3.76022	2.96532	3.3978	2.61589	3.99186	3.37295	3.57652	3.65306	4.22882	4.11437	2.79909	3.65992	3.49057	3.91839	4.42694	3.74201	3.33628	4.41143	3.5472	2.75702	2.78241
CYFIP2	0.114088	2.64847	3.24793	1.01436	4.90304	3.34199	4.21179	2.40599	5.72846	0.687061	3.40735	4.5472	5.10811	4.14649	1.81967	0.687061	1.26303	5.34483	5.31832	4.16591	4.27426	3.94017	2.72901	0.111031	4.96901
TAB2	0.19126	5.0148	3.67582	4.12267	4.48156	4.30597	5.24108	3.22497	5.18903	4.20477	4.16832	3.8125	5.56651	4.71094	4.86047	4.52105	5.36597	4.88753	5.07382	4.79753	4.68201	4.25096	5.17273	3.9607	4.49889
GINM1	0.215535	4.83238	2.98003	4.0798	4.22033	3.90014	4.59932	3.63459	3.70708	4.03562	3.33771	4	4.12846	3.58376	3.65764	4.16189	3.9644	4.83895	4.0072	3.79181	4.63459	4.4522	3.87283	4.47832	4.85499
EIF2AK2	0.262114	2.90111	1.11103	2.02857	2.24793	3.73335	4.33128	1.5509	3.52356	3.44095	2.87971	3.14405	4.62877	3.07724	1.26303	2.65992	4.38543	2.67129	4.18824	2.98003	3.48414	4.17712	4.08661	3.63459	2.04614
USP36	-0.191401	4.78241	4.81967	4.62176	4.39369	5.24108	6.4031	3.32912	5.73363	5.96532	4.3505	4.41481	5.53045	5.04658	5.28466	4.87431	5.18903	5.67044	5.20906	4.65992	4.07724	5.25172	4.95	4.08406	3.04264
KMT2C	-0.223781	5.08236	4.37712	4.18031	4.75756	4.93121	3.7845	3.1177	4.07125	4.92884	3.56438	3.3505	4.53481	4.55213	4.77136	4.92647	3.37156	4.89676	4.7021	3.75916	4.35544	3.93263	4.12102	4.0072	3.9542
PUM2	-0.0982647	5.65076	4.94953	5.15299	5.72083	5.47021	5.35368	4.16912	5.52231	5.68818	5.01748	5.06609	6.20183	5.47184	4.79546	5.72055	5.62059	5.45713	5.88533	5.22882	5.39917	5.11645	5.58767	4.41007	4.79129
MRPL43	0.0660898	4.79597	5.93428	6.32048	5.63923	6.46646	6.3856	6.27631	5.8166	6.33307	6.15482	5.40701	5.95582	6.11395	5.64328	4.40259	6.539	6.12309	5.75302	5.94673	6.47298	5.88972	5.99684	6.64357	5.35826
HPF1	0.296922	4.61117	3.76129	4.43029	4.51602	4.37504	3.53356	4.35614	5.22188	4.39163	4.4957	5.29499	6.03782	4.65821	3.74308	4.70377	4.30305	5.31397	4.14486	5.6946	4.75809	5.0036	4.916	4.46597	4.67525
ZFR	-0.468803	7.15289	6.95478	7.78188	6.49121	6.15279	5.06264	5.22882	6.06846	5.6565	7.08438	5.11686	6.47525	5.87283	6.4271	8.57833	6.10455	4.33485	6.09128	5.88899	5.50176	5.09845	5.75275	5.41752	4.6011
RC3H2	0.160758	3.38267	2.63459	2.65306	3.27053	3.34483	4.15704	2.17313	3.29425	3.94392	3.08066	3.13258	3.83289	4.14975	2.81352	3.70487	3.78031	2.97085	3.74416	3.67016	2.67356	3.83086	4.26604	2.80323	2.84398
TRAF3IP2	-0.14851	4.0018	2.58015	3.87676	4.64559	3.26903	3.98914	4.76394	3.18428	3.27947	3.37016	3.70487	3.68818	3.89821	1.18903	3.44493	0.565597	4.25852	3.50462	0.214125	3.69042	4.08066	2.9222	1.54102	5.36036
SOAT1	0.0209809	3.58856	2.0321	2.72028	4.24336	3.0054	3.2765	1.70044	2.52105	3.47768	3.70044	1.7866	3.61589	3.32481	2.29572	4.01614	3.14568	2.96347	3.65992	3.44626	3.88264	3.37295	3.30889	2.12763	2.55336
GDI2	0.203142	6.43796	7.60755	7.46033	8.07922	6.78005	7.60474	6.23458	7.393	8.23463	7.2902	6.62936	8.05572	7.58984	7.40028	7.17333	8.50581	7.198	7.29306	7.34225	7.40727	7.37834	7.16209	6.80426	7.75656
ATG5	-0.133947	5.22342	3.80426	4.39985	4.5656	4.70764	4.30961	3.08236	4.05137	4.21257	4.1152	3.90111	4.72792	3.98459	2.92979	4.12681	5.40973	5.50526	4.59991	4.1127	3.77294	4.23496	4.22805	4.36737	4.01346
PITHD1	0.39451	5.21956	5.30159	5.17353	4.84097	5.28392	5.88387	4.63691	6.40071	5.39369	5.56377	5.57077	6.63067	6.17033	5.23189	5.56041	6.72969	6.011	5.7811	5.86344	5.70874	5.89748	6.31524	6.05788	5.15259
MTA3	0.033738	3.13093	1.57046	2.36177	3.05137	4.61589	2.926	3.58736	3.95606	1.83188	3.55459	3.52482	4.69655	3.31034	3.88557	2.73552	4.75114	3.40327	4.33771	0.678072	3.90014	5.11853	3.89918	4.06953	0.250962
USP13	-0.189358	3.79494	2.37295	3.12267	4.46401	3.50335	4.58376	1.97453	3.33485	3.65421	3.47768	2.86592	4.08916	3.20163	2.64847	3.88069	3.96347	3.38543	3.72574	2.08746	3.24336	4.87332	3.37434	2.96901	1.57046
ATP11B	-0.10193	4.51286	3.21878	4.01167	4.94953	3.86987	4.15543	2.64847	5.80452	3.69377	3.92029	3.65764	5.50398	5.09677	2.62761	4.89385	5.25437	4.36247	0.137504	3.26454	3.91073	4.35755	4.87431	3.4489	3.55336
SEC61A1	-0.16125	7.4759	6.88007	6.68004	6.6532	6.44841	6.81622	5.07211	6.86406	6.86518	7.13299	5.88655	7.20877	6.6799	5.92434	6.99729	7.3361	7.64111	7.53099	6.40054	6.39832	7.01402	7.26322	5.75515	5.92813
PPP1R12A	-0.00478238	4.91456	3.79077	4.35826	4.83086	5.05788	5.22072	4.7366	5.58796	5.06824	4.41684	4.35966	5.8632	5.54164	3.85699	3.87971	4.80941	4.74846	5.76871	4.33914	4.26978	5.46989	6.07639	4.67412	3.74846
CROCC	-0.120665	3.82883	2.53605	2.28983	4.01881	2.53107	4.37782	1.85599	5.337	4.03562	3.42358	1.774	5.08874	2.35332	2.97085	3.04439	4.82171	3.9486	3.64616	2.38681	3.77294	4.26078	4.76182	1.19535	1.04963
POLR3E	-0.218666	5.30634	4.68201	4.98959	4.79701	5.19495	4.57592	4.21179	5.91025	4.18428	4.88996	4.44559	5.47151	5.78869	3.98732	4.68032	5.29499	5.17313	5.20789	4.65707	4.904	5.68117	5.59425	5.01033	2.85599
ATP2B4	0.300667	5.27463	3.55336	4.35191	5.93899	4.64731	3.34767	3.66334	5.57592	3.16993	4.65878	3.54844	5.53947	4.66448	4.0036	4.55766	5.09887	5.6476	5.65564	5.45483	5.08534	6.53559	6.0433	4.38198	5.36177
ZC3H11A	0.0435601	6.32625	5.29352	5.27314	6.07852	5.20906	6.13853	5.42928	5.87283	6.01703	5.75836	5.88338	6.27538	5.67214	5.77241	6.03452	6.10203	6.0635	6.1807	5.85798	6.10664	5.39335	6.3658	4.76871	5.66021
RIOK2	-0.139118	4.24793	3.41954	3.79494	4.02059	4.17153	3.83895	4.926	3.1635	4.61176	3.45286	3.83693	4.09424	4.28021	2.63923	4	4.64904	4.31397	4.24945	3.56803	3.54844	4.93687	2.75916	4.62234	2.98914
YIPF1	-0.0399465	4.49057	3.76765	3.78555	3.62877	3.69822	3.43429	3.24184	4.08151	3.65992	3.42089	4.0917	4.39438	3.78241	3.08406	3.77821	4.62117	4.22728	3.80219	3.99277	3.44758	3.94392	3.59932	3.64616	4.0054
NDC1	-0.231694	5.90833	4.1235	4.69655	4.96162	5.11228	5.59932	3.16832	4.93499	5.28614	4.3875	4.1635	6.17273	4.8334	3.69153	4.57228	6.2854	4.69933	5.34127	4.97407	5.14445	4.82731	4.56255	4.28836	3.41684
DGKG	-0.265801	2.99095	1.85997	2.61117	3.72028	2.8339	2.68257	1.09761	2.34767	3.34908	3.34483	1.5008	2.89918	0.389567	0.650765	3.56316	3.93263	4.16912	3.79181	1.97453	2.854	0.678072	2.65764	0.333424	0.214125
FLYWCH1	0.144549	3.84699	4.1819	3.64501	4.14405	3.30597	2.05658	3.73877	4.03826	2.95606	4.67299	3.78031	3.45812	3.90497	3.36457	4.57228	4.05918	4.6241	4.94205	2.43829	4.23802	4.63517	4.91743	3.53107	3.57531
UNKL	-0.208575	3.90593	3.76022	2.66448	3.74846	2.50335	2.7761	1.11103	3.40054	2.45681	2.95233	1.87971	2.51602	2.47249	3.33771	3.19535	4.47768	3.75061	3.33056	1.26303	3.0197	3.24336	4.0365	1.81558	2.01436
TBXAS1	-0.0178659	3.9855	2.86394	4.66391	4.43763	5.76871	3.26903	4.09761	4.39163	2.07382	4.51033	1.54597	4.72247	1.04963	4.15381	5.20555	4.65421	4.8495	7.14598	3.91169	5.11061	3.37573	3.28096	3.13586	3.24489
PARP12	0.170413	3.33914	0.31034	2.04264	1.58976	4.75969	3.04089	1.62293	4.23649	3.65535	2.72028	2.33914	4.24184	0.0840643	1.04264	2	4.9528	3.23573	5.69125	2.57773	3.81967	2.80116	4.34199	5.06048	1.42223
ALDH18A1	0.0950918	4.74147	4.78607	4.95791	5.33914	6.50383	7.00484	3.33342	5.77189	6.6565	4.86245	4.57592	6.43079	6.03452	4.74255	3.61589	6.41583	5.67299	6.25852	5.29866	6.66704	5.96	6.01212	5.6585	4.28762
TARBP1	-0.548075	6.13935	6.4348	5.69042	7.18478	5.80967	6.32445	5.53916	5.68089	6.4353	5.92529	5.5552	5.25058	6.08044	5.24146	6.43962	6.23917	5.22766	5.58916	4.19377	5.76818	4.77452	6.26134	3.84197	4.20711
GATB	0.00167254	3.65421	4.15623	4.27724	4.13258	4.61824	3.49697	4.98413	3.52607	3.54226	4.65249	3.12102	3.81865	4.54844	3.91552	3.99186	3.67582	5.19928	3.26604	4.24184	3.56194	4.01703	4.19219	4.72629	3.8953
MXD1	0.168422	1.70044	3.0036	3.33771	2.31034	3.2555	2.76341	2.98185	2.46728	3.51475	3.22033	2.17632	2.71149	2.96717	3.14078	3.854	2.68482	2.52607	3.88362	2.16672	2.47768	2.40054	3.82171	3.18587	2.37573
CDK17	0.255906	2.9241	2.01078	2.32769	2.99458	3.92884	3.41414	1.88362	3.9364	3.61235	2.25096	3.02148	4.65707	4.0054	2.50589	2.20477	3.52982	2.22959	3.41549	3.73877	2.61117	5.28799	4.60348	2.89142	3.07553
DNAJC25	-0.202039	2.94486	2.37016	2.58736	1.92979	2.5509	2.83188	1.65076	1.95233	3.17951	2.30159	2.14078	2.08066	2.51349	1.49057	2.64847	2.87184	2.55582	3.07211	2.14405	2.59216	2.72465	1.64616	2.84398	1.69599
SLC2A3	0.417817	1.07039	4.04177	4.51728	4.40667	5.0009	4.89385	3.91743	6.40888	4.29866	1.98185	5.34908	6.11353	7.05224	8.17013	5.06134	4.13011	4.61765	5.45418	5.99571	4.05745	4.53294	4.7148	6.82413	3.80116
CTDP1	-0.313715	4.21257	4.84348	4.43896	4.69153	4.68986	4.08661	3.35473	3.70487	3.99005	4.64616	2.79909	3.70266	4.09508	3.47768	5.28762	3.97545	5.01569	3.4957	2.67129	4.41007	2.20477	4.13093	3.25399	4.0036
YBX3	-0.179017	6.50096	6.96636	6.60925	7.03727	7.33887	7.54365	6.52935	8.40689	8.07911	7.05983	7.21519	8.3147	7.86344	7.05061	6.20614	7.84718	6.93522	0.678072	6.70473	0.678072	6.95931	7.31615	7.14914	6.29149
WNK1	-0.368912	6.50589	4.2211	5.90929	6.17293	4.59395	5.72765	4.50208	6.56224	5.38716	4.65821	4.98231	6.89215	5.61058	4.82731	4.49761	5.69655	4.9331	6.16993	5.18031	5.19022	4.76713	5.71589	4.10098	3.40599
CCAR1	-0.296095	6.1631	6.12329	5.85848	6.25039	6.24413	6.57092	6.1631	5.88801	7.08799	5.62322	5.14731	6.0691	6.25833	4.85549	6.47735	6.62088	6.10538	6.00225	5.59872	5.61765	5.11228	6.11166	5.95047	5.54628
OGFR	-0.129505	5.23649	5.30925	4.9486	5.27724	4.92077	5.02459	4.03122	4.40395	4.15704	5.41007	3.67129	4.33771	4.50843	6.03078	5.2149	5.17393	5.55367	5.96301	3.6565	5.54226	5.16511	5.08916	4.26978	4.15543
GNA15	-0.156881	4.28096	6.16229	5.87406	4.56071	4.92125	4.86146	4.23189	4.83845	3.70044	4.67638	4.96116	3.42089	5.87086	4.6837	4.55704	4.46858	5.75355	5.68818	5.10308	4.69042	0.0285692	0.773996	2.63923	6.87086
PIGV	0.0574215	3.43162	3.13586	2.66448	3.20006	2.28392	3.19061	2.01078	2.24184	2.46989	3.2032	2.4957	2.88362	3.5435	3.18269	4.06781	2.18587	3.59813	3.77821	2.12763	3.02503	3.52482	3.44095	2.14731	2.9855
SNRNP40	-0.153018	6.63241	6.29315	6.21432	5.74362	6.17433	6.52215	4.24489	6.82388	6.12122	5.79675	5.68173	7.33762	5.95489	5.14119	6.01413	6.86047	6.34891	6.25852	6.53869	6.44228	5.85674	6.40156	5.61883	5.34199
QSER1	-0.129479	3.94579	2.35614	2.85798	3.13422	3.32769	3.72683	1.31034	3.08066	3.61117	2.926	2.45418	4.0036	2.72465	1.65535	3.2854	3.82985	2.63227	3.80426	2.88557	3.03914	3.80529	4.06781	2.36457	1.94486
MPC1	-0.0801097	6.17712	5.46499	6.83491	5.48768	6.81301	4.27798	6.1299	4.13832	5.21179	5.34908	6.21101	4.78188	5.09424	4.30012	6.17133	5.97705	6.99027	6.34961	5.01257	6.77268	5.20438	4.94158	6.58165	5.45582
ACAA1	-0.00183415	5.46597	5.46891	5.20945	5.34234	5.49474	5.52293	5.52888	4.45812	5.58616	5.47054	4.50335	4.14405	5.85375	4.87234	5.21451	5.31361	6.46222	5.75622	5.33878	5.71122	4.73985	4.90448	5.1643	5.75141
BCAT1	0.0299769	3.93357	2.39232	4.83845	3.03738	5.1534	4.9644	4.25399	5.98185	4.72738	1.07724	4.33771	6.25248	5.79572	2.58015	3.18269	4.28021	2.77189	5.64559	5.63081	3.24184	4.38128	5.27984	2.90689	3.70155
HDAC7	0.413812	3.25399	3.64501	3.89045	5.08066	4.82426	5.32769	4.13586	6.19908	4.48736	4.70155	4.29646	6.30706	5.76845	3.81762	4.12763	8.27873	4.58916	4.72738	6.32481	4.05137	4.5097	7.77419	6.29517	4.7126
MRPS35	-0.28933	5.99458	5.37051	5.84122	5.89579	7.15876	6.0354	5.06523	6.2075	5.53823	5.55766	5.78764	6.88582	6.29002	5.47314	5.51759	6.29921	5.66249	5.82706	6.25058	5.84674	5.80555	5.94603	4.74201	4.43095
SFSWAP	-0.305306	4.82171	4.75435	4.63749	4.76235	5.74739	5.1819	4.28688	5.27798	4.90737	5.51475	4.0781	5.19061	5.0018	4.48864	5.29866	3.95699	5.26866	5.13586	3.8748	5.01926	4.42492	5.3726	4.21023	3.488
TNK2	0.0923179	3.98094	3.7148	3.34908	5.20163	4.36387	5.85873	3.55704	5.70432	4.35614	5.53699	4.2817	4.82528	4.55888	3.71918	5.1819	5.7703	6.15522	4.86691	3.05485	4.56133	4.43563	6.27612	1.77821	4.21723
MON2	-0.0829538	3.94111	2.8339	3.25852	3.78031	3.32481	3.60407	2.68032	3.43296	4.29205	3.49313	3.04439	4.15218	3.80116	2.79494	3.90977	3.58376	3.77926	4.03562	2.36457	3.30597	3.82273	4.34696	2.6893	2.76553
GPBP1	0.242806	5.52826	5.29682	5.20789	5.29499	5.25475	5.46172	5.0237	4.91025	5.74927	5.39815	5.50367	5.62381	5.45582	4.79805	5.42761	5.40122	5.95373	5.52576	5.01302	4.99639	5.56346	4.96255	5.31179	6.39558
DGAT2	-0.384754	5.02813	3.07895	3.96532	4.42559	3.87873	2.26003	3.23879	1.81147	3.44626	4.18824	3.88166	2.13093	0.454176	3.47768	3.97545	3.26303	4.21257	4.83289	1.95606	3.848	4.02945	1.35614	2.12763	1.5656
CS	-0.21516	6.80452	6.81468	6.69363	7.52599	7.57031	7.475	5.26716	6.74833	7.07735	6.83453	6.57909	6.88007	7.24802	6.27445	6.86468	7.44294	6.58165	7.09782	7.09223	7.06717	6.50938	7.17373	6.27984	5.72982
MRPS24	-0.461012	7.3345	7.17971	7.20379	7.63285	7.58256	7.01547	6.77321	6.56727	6.3482	7.0365	5.80658	6.60199	6.56742	7.52873	6.98857	6.77703	7.09022	7.29057	6.03342	7.33253	7.20203	7.10706	6.01792	5.77294
ELMO2	-0.0599456	4.81096	4.15704	4.15623	4.45154	4.69098	4.87971	4.06523	3.6311	4.904	4.488	4.35685	4.24717	4.42626	3.99186	4.78136	4.27202	4.97774	5.73823	4.45812	4.57713	4.32048	4.71205	4.48671	3.59335
WAPL	0.214552	4.21723	4.72738	4.42761	4.59932	5.18626	4.64328	3.60288	4.44029	5.53201	4.68818	4.9607	4.91409	5.11228	4.26153	5.17632	5.31832	4.62234	5.16229	4.69042	4.37365	4.03562	4.92029	4.26379	4.91073
VMP1	0.20683	5.11603	5.04876	5.3565	5.43329	4.88996	5.90545	4.19849	5.06264	4.85848	5.13093	4.67129	5.53138	5.44824	5.12722	6.2114	5.0492	5.22458	5.56894	4.75489	4.66391	8.47298	5.79597	5.28947	5.40122
APPBP2	0.092116	3.63691	2.22651	2.57773	3.19535	2.80941	4.0365	1.72247	3.60881	3.52732	2.61589	2.52105	4.25626	3.2854	3.1811	2.88362	3.8125	3.20006	3.65421	2.66448	2.91648	4.49121	4.1416	2.13093	2.65076
POLD1	-0.398531	6.55735	7.02967	6.81992	6.07874	6.12164	6.23936	5.86121	6.60185	6.11124	6.14914	4.73823	6.21315	6.69905	5.91552	6.39318	6.52701	6.47832	6.60792	5.05832	6.70487	5.07639	6.87492	5.8936	5.12639
EIF4B	-0.181068	7.79773	7.38896	8.20418	8.30282	8.40731	8.12216	6.35014	8.70027	8.75642	7.56583	8.22723	8.71036	8.67387	7.94755	7.75962	8.30246	6.92386	6.99095	8.49293	7.61309	7.75882	7.51578	6.64559	7.33423
BICRA	-0.0807011	2.1375	2.24489	2.21412	2.15056	3.55336	2.09424	1.99639	2.16672	2.1375	2.22033	1.3505	1.87184	2.08406	2.01078	2.15381	2.62994	2.22959	2.92979	2.30159	2.15381	1.774	2.89918	2.32769	1.83592
SPHK2	-0.299415	3.43829	4.44626	3.80632	3.41143	6.0268	3.27053	2.30159	4.12184	3.0018	3.30597	2.01792	3.74416	3.90304	3.46336	3.04264	4.47314	3.72574	4.7339	2.73552	3.25701	3.32048	4.42358	2.22959	2.06005
RPL18	-0.0125684	10.7466	11.38	11.4722	11.2841	12.9371	11.1255	11.9632	11.4775	11.004	10.6624	11.9588	10.6848	11.0587	11.7218	10.9346	10.713	10.3931	10.9763	11.9338	11.3881	10.5248	10.845	11.9251	11.9641
CA11	0.145721	2.75489	3.60644	2.61824	3.76022	1.47508	2.16993	4.04264	3.03034	2.57773	5.04352	4.63865	2.39506	3.17632	1.7866	4.45483	3.42089	4.17393	5.33235	4.1375	4.02945	3.30159	2.57289	3.32769	2.26003
ISOC2	-0.231519	5.67469	6.71438	6.53667	5.58916	5.71754	6.43112	4.9222	6.3411	5.7021	5.71754	4.10434	6.14405	6.40871	4.89385	5.17832	7.3036	6.04352	6.18428	5.56102	6.69683	5.29756	7.10821	6.13402	3.69153
U2AF2	-0.266614	8.03881	8.34753	8.24336	7.36001	7.79442	8.18329	6.29297	8.20203	7.5263	7.62139	6.72042	8.14746	8.36693	7.59917	7.91851	8.41625	8.11515	7.95041	7.9782	7.58225	7.16692	8.29916	7.62388	6.43229
EPN1	-0.172373	6.1639	6.4957	5.72219	5.83996	5.07724	5.47541	4.40871	6.39215	5.22997	6.69153	3.05137	5.6879	6.36142	6.25965	6.10014	6.46532	5.08704	6.09677	4.21101	6.66633	6.18547	6.45533	3.99548	4.8674
MED29	-0.0786976	4.5097	4.25248	4.15381	3.88753	3.22497	3.61471	3.40599	4.44824	3.59455	3.67243	3.53481	4.12516	3.9607	4.5656	4.14812	4.13832	3.55336	5.05658	3.9514	4.07296	4.50589	4.44095	4.16672	3.08066
AHRR	-0.582662	5.43929	4.26754	4.80012	4.93357	5.29315	3.95699	5.06566	1.93357	2.93357	5.09085	4.29866	2.74846	3.23879	6.78202	4.7703	1.30451	4.31832	4.26303	0.613532	3.36317	1.09085	1.02857	0.389567	0.0565835
ZNF275	0.014287	3.12598	2.09085	1.9782	1.74846	2.55336	2.62527	1.50589	2.44095	2.57531	2.21101	2.03562	2.60644	2.87381	2.13422	2.5435	3.41278	2.31034	3.71699	2.32769	4.35826	2.81147	3.15056	1.87578	0.9855
MTMR1	0.182655	3.42895	1.51602	2.94298	3.53107	2.84599	2.25399	1.73118	2.65992	2.76129	3.80323	2.72901	3.01257	3.5097	2.10434	3.25399	4.45746	3.6427	4.12433	2.63227	3.67243	4.81865	3.46074	2.46989	1.98185
ADCK1	-0.190116	3.36317	3.10936	2.61117	2.46989	2.67356	2.62994	1.93357	2.22342	2.37016	3.37156	2.19535	1.66903	3.38543	2.27798	3.15056	2.63691	2.38405	2.93923	1.774	2.91073	2.30743	3.12102	3.41278	2.18269
HAGH	0.0988415	5.01569	4.66107	4.58676	4.51096	4.1643	3.29572	4.53356	4.54226	3.32912	4.95977	4.67864	3.91934	5.24375	4.76765	4.72083	4.45154	4.99639	5.61941	3.60407	4.60881	6.19239	5.94603	4.72792	3.85898
RNF4	-0.316588	5.78162	5.32121	5.03078	5.03738	6.11166	5.75462	3.22188	5.58195	5.19338	4.34412	4.49889	6	5.53605	5.22072	4.92552	5.01748	5.48188	5.45713	4.82222	5.31397	5.1981	4.50906	4.46205	4.16672
CASP8	0.0170747	4.80323	3.07211	4.59335	4.39369	4.8515	4.14975	3.85997	5.45648	4.55336	4.60881	5.24375	5.1643	4.05224	3.9364	4.68818	5.31252	4.60288	5.7211	4.95606	4.16511	4.23343	5.80967	3.08406	3.37851
INTS13	-0.141257	4.8268	4.72574	4.90833	4.65134	6.60318	5.84222	5.46205	5.22997	5.80219	4.2555	4.24565	6.15704	5.52576	4.26604	4.94064	4.99232	4.93876	4.71534	4.86641	5.93687	5.62147	4.64789	4.20163	4.70653
TM7SF3	-0.0714301	6.5489	4.74685	5.21529	5.87873	8.00904	8.22675	3.6311	5.68482	8.09006	5.25248	4.34767	6.29701	6.86493	4.69098	5.779	5.70072	7.59328	7.27482	5.33092	6.0691	5.51033	6.87307	3.74524	5.64472
TSPAN32	0.0835108	5.16752	4.36597	3.19535	4.0505	3.22959	0.0840643	3.39232	6.66747	0.0976108	5.47832	4.33557	4.47184	5.10098	2.70266	4.36387	4.58496	6.12122	5.64904	3.42895	4.15218	0	5.51159	5.04832	4.37712
ST3GAL6	-0.262682	5.17153	2.58736	4.0072	5.37504	4.91169	2.8339	3.88264	0.0840643	4.62527	4.0365	3.46467	0.31034	0.250962	2.5509	5.4522	0.15056	5.30816	5.47379	1.33914	4.97682	0.903038	0.124328	0.422233	4.14405
TAF2	-0.166528	4.94439	4.21645	5.34412	4.48027	3.58616	5.19967	3.42358	5.34518	4.24717	4.42021	3.89239	5.52199	5.32012	3.72683	4.19849	5.1152	4.64962	4.71315	3.72574	4.57773	5.30451	4.92458	4.4489	3.44493
HIPK2	0.37454	2.21723	0.722466	0.536053	1.97085	3.60288	1.83592	0.641546	4.10769	2.02503	2.0072	0.536053	4.7021	2.50335	3.926	2.9222	4.22265	2.35614	5.41312	3.854	2.25096	5.67976	2.37016	3.20163	1.65076
TNPO3	0.00516208	5.35579	4.59156	4.69655	5.07767	5.67129	4.24717	3.6837	4.72356	5.0798	3.87873	3.97636	5.27389	5.3067	5.16672	4.98231	5.70127	5.26866	5.55919	4.60822	5.70681	5.22959	4.33271	5.70099	3.83086
RFXANK	-0.0925632	6.98652	7.37025	6.98743	6.98755	6.60955	6.26547	8.82845	6.34412	6.12019	6.05202	7.28937	5.74308	6.92398	6.99842	6.41735	7.94181	6.88203	7.23936	6.05072	6.56255	6.37417	6.57803	7.19682	7.16611
TMEM161A	-0.232488	4.96809	5.73688	5.80426	4.30012	5.2604	5.20242	4.10518	4.59455	4.48993	4.55459	4.77347	4.4822	5.55949	4.75809	4.91839	5.93993	4.7703	6.02104	4.26978	5.37921	5.82782	4.69265	5.40905	3.17632
LPAR2	-0.207952	5.63081	5.85549	4.79286	5.54936	2.75702	5.02414	5.10978	4.34696	3.84699	3.98003	4.82934	2.16993	3.52231	5.16189	4.8679	4.09761	5.35297	6.05658	1.68706	6.34607	2.11103	3.25399	3.96901	5.52951
CTSA	-0.0557808	6.88667	6.3361	6.15765	6.78215	5.97613	5.40803	6.11666	4.66959	5.40293	6.54859	4.30086	4.72846	5.59365	5.43663	7.4025	5.4614	8.04023	5.62527	4.58075	7.0621	6.84034	6.28688	5.4363	6.62834
SUGP2	-0.26375	6.53823	6.79299	6.14323	6.49681	6.05875	6.46385	5.57743	5.99367	6.83517	6.65134	6.45631	5.82043	6.24565	5.08874	6.41312	6.22419	6.77347	7.22776	4.45681	6.89409	5.9465	6.99808	6.00675	5.05658
CNN2	0.267311	7.29829	6.79948	6.84787	5.23649	5.97659	5.66477	6.37434	6.22323	5.3345	7.05072	6.46548	6.42408	7.21636	6.16048	6.52466	6.82286	7.15168	7.61464	8.20545	7.05723	6.38024	6.61412	6.74967	7.44501
ABCA7	0.101206	3.95327	4.88704	3.8748	4.91648	1.65992	1.79077	2.78241	4.88313	2.42761	4.8475	3.83794	3.47508	4.33557	3.90207	4.93357	5.10056	4.74039	4.926	2.22651	4.5435	2.36177	5.26754	4	3.70487
DDX20	-0.0374084	4.26903	3.6427	3.57046	3.73552	3.93452	4.20006	3.21568	3.86691	4.19061	3.30159	3.58256	4.87184	4.03738	2.86196	3.66107	4.01167	4.06091	4.27724	3.58135	4.12928	3.58496	4.0781	4.06523	3.60288
BTBD1	0.392982	4.82985	4.50906	4.56925	4.69822	4.96486	4.94392	3.30012	5.85549	5.23726	4.44559	4.9982	6.21548	5.64875	4.06523	4.87774	7.25361	5.04045	5.90617	5.63691	5.77479	5.71809	5.46434	4.79909	5.45943
FAR2	-0.0763791	5.15259	2.02857	3.75382	4.68313	5.11395	4.89045	3.31759	5.72792	4.07211	6.78031	4.56925	6.01369	4.94158	2.84398	0.659925	4.76977	4.71589	5.84599	4.75328	4.31179	3.60407	3.7666	2.73769	3.96532
SBNO2	-0.384786	5.14037	4.20633	4.18666	3.64501	3.51602	3.76129	2.40871	4.10434	3.87381	3.73227	3.30889	3.44493	3.71589	4.79961	3.9855	3.83592	4.30597	5.09592	3.04264	4.13175	4.02945	3.52105	2.6893	2.40327
PMS1	-0.113663	3.84699	3.52482	3.8748	3.83491	4.23649	4.69988	3.02503	4.49953	4.31832	3.36317	3.98641	5.46956	4.03562	2.39506	4.09339	4.80116	3.848	3.91456	3.59096	4.61883	4.9222	3.98003	3.13258	2.57773
HMG20B	-0.190741	6.50048	6.92552	6.12681	5.90737	5.13627	4.8953	4.95884	4.86493	5.37886	6.02059	5.29719	4.75275	5.90593	5.73498	6.29627	6.07403	6.30889	6.83061	4.6011	6.5691	6.51207	4.50144	4.67638	5.76977
TAF11	-0.173848	5.50843	4.58436	4.94533	5.36527	5.11936	5.07253	4.79753	4.6605	4.93782	4.57228	4.82426	5.2854	4.73118	4.08916	4.83036	5.31651	5.851	4.80374	5.11312	4.66619	3.64962	4.87036	5.49921	4.78921
ANKS1A	-0.217298	3.69599	2.37851	3.13586	3.62644	3.57894	3.46205	1.67807	2.73769	3.16832	2.94111	1.59932	3.27947	3.06178	2.36457	3.12598	3.49057	3.11936	3.47897	2.21723	3.78136	3.5472	3.08916	2.08066	2.23573
AP3D1	-0.174864	6.83933	6.34163	5.79779	5.07425	5.46956	4.90593	4.08151	5.77452	5.80193	5.85873	5.65421	5.71012	6.34216	5.57924	5.59246	6.20555	6.16631	6.57137	5.63633	5.93617	6.59559	5.68145	5.60377	4.57833
ZNF76	-0.192925	5.47703	3.80116	4.76818	4.96162	4.58135	5.12309	4.70598	5.38853	4.7939	5.0009	3.91934	5.14893	4.69655	4.04002	4.86394	4.32048	4.87381	4.80012	3.96255	7.46728	4.25852	4.95513	3.89142	3.50843
SLC9A3R2	0.172449	3.01614	2.35614	2.58256	0.201634	3.78555	3.66221	1.59455	2.19849	3.14893	2.82579	0.575312	2.488	3.69042	3.36177	1.96717	4.78816	2.49057	1.65076	1.92979	0.669027	4.18666	4.95093	3.74093	3.36317
NTHL1	-0.0454262	4.55152	5.17273	4.90689	4.17233	5.89118	4.32912	4.02414	4.68874	3.40735	4.28466	3.86493	4.59872	5.00944	4.26679	3.99458	4.73444	5.22843	4.79546	4.80219	5.16189	4.99865	5.50462	4.87184	4.07382
UHRF1BP1	-0.0237998	3.80426	1.91073	3.26604	3.52607	3.33199	3.70708	2.14405	3.76022	3.58376	2.5509	2.67356	3.79597	3.86987	1.85997	3.05832	3.85798	3.34908	3.77821	2.85599	3.48156	3.62527	3.79181	2.80941	2.5656
GNAI3	0.130322	4.33914	3.48414	3.51349	3.86592	4.17073	3.76765	2.40327	3.80323	3.82375	3.57168	3.70708	4.59156	3.98732	3.2555	3.73444	4.24489	4.07468	4.50208	3.76765	3.80219	4.80735	4.25776	3.70487	3.67243
IPO5	0.20191	5.40565	5.18428	6.23439	6.15563	6.79714	6.8695	4.77347	7.18587	6.50716	5.58586	5.97338	7.7828	6.96463	5.21568	6.29057	6.68215	6.21665	7.21354	7.09392	6.86059	7.09001	7.01246	5.78293	5.01748
OAT	0.30244	4.37086	4.71699	4.79494	4.68032	3.15704	4.22882	2.75489	7.29425	6.86999	5.78529	3.71809	7.19741	2.95606	4.76607	4.01525	7.8334	6.23209	6.20574	5.67751	6.38526	6.41193	8.17008	6.4224	3.8846
WDR3	-0.117564	4.78764	3.0054	3.98641	3.79909	4.79233	5.05007	1.62761	4.9855	4.46401	3.33485	3.21412	5.38612	4.5097	3.17153	3.41414	5.16792	4.20477	4.46336	4.53916	4.32265	4.89433	4.43296	3.34908	2.20789
PKN2	-0.0170914	3.67243	2.66676	3.10936	3.47638	3.07039	3.80012	2.82171	3.849	4.21335	3.37851	3.01792	4.67582	3.55336	2.23879	3.77294	4.11187	3.38267	4.05485	2.68482	2.79077	4.46336	4.46401	2.73335	2.40871
WDR18	-0.232046	5.43095	6.49921	6.31125	5.05094	5.84499	5.41684	4.62585	5.67807	5.63023	5.49089	5.46336	5.65935	6.23534	5.81404	5.33092	6.16692	5.91672	6.61692	5.65076	5.73525	5.39403	5.35685	5.15543	4.54288
TRAM2	0.0332634	3.52231	2.08746	2.76341	3.08066	3.54473	3.0321	1.64155	3.85499	2.53854	2.95233	1.65992	4.41278	3.8339	2.54597	2.50335	4.15299	3.82171	3.35191	2.01792	3.92979	3.0054	3.49057	3.69042	1.91456
MCM10	-0.153624	3.66789	3.91169	4.20555	3.74846	4.41616	4.84398	1.97453	4.41549	5.07938	3.69933	2.74846	5.61471	4.48027	3.33914	3.52105	5.40701	3.87086	4.33842	3.78136	3.00899	3.04614	4.3147	3.66448	2.49057
DGKA	0.0753066	3.90111	4.16672	3.90304	5.24375	4.67412	3.91361	4.69209	5.4138	4.25626	4.13586	4.68089	4.98596	4.18269	4.48156	4.31687	2.83188	4.96486	5.84474	2.80735	4.43896	3.75596	4.98823	3.76553	4.9241
ANKRD44	-0.111087	2.66221	2.63923	2.30743	3.23879	2.62527	0.910733	1.65535	0.565597	1.51602	3.29131	2.36737	1.31034	0.0426443	3.35191	3.43029	0.214125	2.94111	4.08746	0.124328	3.20006	2.68482	1.4489	0.263034	2.39232
KARS1	-0.21494	7.06437	6.84987	7.17143	6.77189	7.56301	7.59522	6.90749	7.17193	7.13289	6.80168	6.88679	7.5157	7.3482	6.73985	6.74685	7.28993	7.0798	6.73715	7.26679	6.95059	7.60073	7.2078	7.24717	6.11187
ADAT1	-0.317361	4.23496	3.06695	3.42089	3.88166	3.99729	3.24031	4.07296	3.20006	3.52607	4.32625	3.74739	2.93734	4.20242	2.69153	4.41414	2.67582	3.74846	4.50398	2.9782	3.26903	3.78973	3.51602	2.84197	2.43829
PDIA5	-0.119533	5.42828	4.11853	4.65249	4.61648	4.77663	5.0268	2.96901	4.21568	5.29168	4.33414	4.18269	5.21296	4.47962	3.11603	5.08661	4.94767	5.75355	6.38698	3.7666	4.88264	5.32409	4.93876	4.16027	3.14078
TBC1D22B	0.135992	3.91456	2.66676	3.33914	3.84499	2.78241	3.47897	2.56803	4.38474	2.63459	3.15866	2.71149	4.30378	3.37295	2.69822	3.14241	3.10434	5.12474	3.8339	3.04264	4.07296	2.74846	3.59216	3.31759	3.9607
NDUFB4	-0.218373	7.86654	7.62	7.76931	7.53869	7.39789	8.07039	7.94878	7.38802	7.30561	7.4801	8.39064	7.75101	7.15836	7.22757	7.5572	7.01402	8.54168	7.3644	7.25993	8.05452	7.40216	7.58293	8.13617	6.92386
SPEN	-0.213611	5.3733	5.1469	4.74685	4.56925	4.99458	5.26003	3.56194	5.8166	5.2149	4.89772	4.01881	5.91265	5.44128	4.61589	4.90881	5.50112	4.57228	5.30816	4.66221	4.92029	3.89433	5.75569	4.02503	4.13011
ZC3H15	-0.111893	6.50906	5.77873	6.44741	5.99458	6.87135	6.96832	5.89651	7.00248	6.4822	5.58856	6.02813	7.58097	6.43962	5.04089	5.72765	7.30506	6.38319	6.42038	6.58916	6.88911	6.50383	6.52466	6.31615	5.33092
MAP2K4	0.200269	2.5008	2.90881	2.79286	3.19535	3.68594	2.6893	1.87578	3.0268	2.65535	2.99277	2.34483	3.69599	3.94392	2.82579	1.85997	3.66107	2.51602	3.45154	3.57168	2.72465	3.26454	3.71149	3.36177	2.75275
PACC1	-0.225454	5.23381	4.05485	3.9364	5.60644	3.58496	3.97269	3.94298	4.42223	4.1811	4.2765	3.27501	4.48736	3.46074	4.19219	4.37573	3.70266	4.38059	4.18269	4.42828	4.62469	3.36317	4.19061	3.54226	4.63807
SLK	0.315185	2.91265	2.72028	3.13914	3.97269	4.16511	4.16752	1.16993	3.53854	4.98459	3.07382	4.09085	4.38681	3.74201	2.65992	2.50335	4.91648	3.63343	4.51096	3.77189	4.45483	5.26941	4.28466	3.32193	3.64962
CYB5R4	0.0740644	3.96255	3.34483	4.13504	4.95977	3.69822	3.81762	2.37016	5.20516	4.36667	3.78031	3.82069	5.36492	3.5509	3.14568	4.30524	4.33771	4.99639	4.76553	4.14405	2.90497	3.64847	3.2765	4.1102	4.23343
SEC61A2	-0.140407	1.72683	3.14405	2.42761	3.09592	1.66903	2.72028	1.77821	1.94111	2.87184	2.23266	1.5008	2.39232	1.83188	1.65076	2.5509	3.22033	2.5435	2.76553	1.48027	2.27202	2.29572	2.68257	1.58976	1.81967
PRKCQ	0.301324	1.71809	1.76553	1.27501	1.58015	2.0036	3.15704	0.505891	5.18428	2.82171	1.38957	0.400538	5.50906	5.2211	0.475085	0.0143553	4.99277	2.16993	3.13586	5.07425	2.02148	0.0143553	4.70044	3.41414	4.49057
ASB1	-0.0853314	4.35191	4.1127	3.49953	4.17712	4.40395	1.86394	3.99277	3.80529	2.30743	4.5735	2.69822	3.0197	5.14445	4.19849	4.1914	4.2426	3.63459	3.08916	3.46989	3.14568	4.54782	4.1035	4.10266	3.27947
FAM107B	-0.185681	5.78738	5.81558	6.96035	6.52685	5.18587	5.63343	5.89797	3.63227	7.16289	7.94111	5.21412	4.21257	4.5741	6.39129	8.31637	5.15381	7.63438	7.56117	3.90689	6.22786	2.30159	1.64155	2.69599	6.20965
TBC1D1	-0.30051	6.11686	5.23764	5.86096	6.53838	6.95849	5.69181	5.37504	5.03166	5.96463	8.17168	4.70819	5.71012	4.51916	4.90545	5.97865	4.71644	6.6669	6.23132	4.50843	5.96394	5.18309	3.52732	3.82985	5.74147
CDK13	-0.379747	5.17513	4.90545	4.28836	4.70984	4.90641	4.39917	3.74524	3.75702	4.82069	4.40531	3.89336	4.37086	4.46009	4.19377	4.82222	4.40871	4.72083	5.48671	3.39643	4.54473	3.58135	4.74308	3.23726	3.8885
MTHFD2	-0.0771487	6.56117	6.44112	7.91223	7.41007	7.87639	7.58826	8.53761	9.06942	6.86604	5.80607	7.78123	8.80822	8.55021	7.78888	6.98425	7.24365	5.87848	8.49849	7.77248	6.8505	8.36925	7.81769	7.02414	5.29389
FOXJ2	0.279652	1.90689	2.03914	2.43563	3.35332	2.59455	3.47249	1.9222	3.27352	2.48285	2.73335	3.08916	3.59096	3.40735	2.93168	3.13422	2.79909	3.07039	3.848	2.5435	2.32769	3.30012	3.38405	2.16993	2.13422
YBX1	-0.436197	12.7477	9.93737	9.61482	9.62258	10.7541	10.4258	8.96385	10.9242	10.3203	9.71229	9.03829	10.8664	10.3334	9.47273	9.73868	10.9894	10.6924	10.1814	9.72042	10.0391	10.0606	9.87284	10.0224	9.05856
PDE4A	-0.0683823	2.38681	2.52105	1.86394	1.64155	3.62644	2.82375	2.04614	4.09255	2.41954	3.21723	1.33342	4.36667	3.26153	3.63575	2.73552	4.0781	0.863938	0.613532	2.76129	0.432959	2.46728	4.40259	4.40735	0.263034
PPP2R5A	0.161186	4.79077	3.80116	3.87971	5.39985	3.75489	3.67243	3.91456	3.9364	3.48929	3.77505	4.97315	4.54102	4.65363	4.34625	4.41752	4.37295	4.88509	4.80839	4.52544	4.74039	3.51349	4.10685	3.36177	5.04527
ELAVL1	0.081531	5.94228	5.50557	5.25475	5.37434	6.35226	6.35226	3.76765	5.93428	5.36562	5.59036	5.52482	6.59365	6.08364	5.11853	5.33878	6.1823	5.89409	6.22574	6.31687	5.91049	5.50112	6.60051	5.8485	5.02857
TIE1	0.259661	0.214125	0.0426443	0.226509	0.0285692	2.20477	1.22033	0.0565835	7.34412	0.632268	0.286881	1.51602	6.84912	4.34483	0.0565835	0.378512	7.35588	0.275007	0.214125	6.09571	0.0285692	0.0840643	6.08555	0.0976108	2.82782
DIP2B	0.179834	2.44095	2.95977	3.5097	3.95699	3.47508	4.20711	2.39506	3.89239	4.21878	2.79077	2.42761	4.55459	4.11853	2.76553	3.3147	4.83289	2.80529	3.41278	4.1177	3.2032	3.73335	4.49889	3.0036	3.04439
SMARCD1	0.10821	4.77926	4.87431	4.5601	4.94251	6.20222	6.14037	3.94673	6.52074	5.31687	5.12143	5.08236	6.57849	5.66306	4.72738	4.94111	6.88252	5.27053	5.91934	6.00675	4.58736	6.11082	5.95233	5.22342	4.02414
KDM4A	-0.28269	7.46107	4.40599	4.39163	4.49442	4.16269	4.16672	4.0197	5.64904	4.1375	4.64328	3.93263	5.52888	4.99232	5.00854	5.51254	6.0217	4.57228	5.43863	4.79338	4.93829	4.45154	5.04177	3.73444	3.82069
NFYC	-0.451081	9.4844	4.91361	4.81147	5.44989	5.0751	5.34979	4.80168	6.50668	4.75542	5.30451	4.39643	6.85	5.95699	5.28873	5.09803	5.20359	5.19061	5.61471	5.70155	5.31723	5.19219	5.78057	5.03298	4.28466
ASPM	-0.269867	4.72955	3.59932	3.853	5.60288	3.96717	4.69988	3.40054	4.10685	4.49313	3.40871	3.75596	5.60999	3.97636	3.28096	3.87873	4.61235	3.76871	4.40327	3.82477	3.10936	4.07553	4.66164	3.96162	3.10266
CD84	0.243575	2.18903	0.321928	1.98914	4.37921	2.35614	0.526069	1.65535	4.65764	0.15056	4.42694	0.250962	5.43396	3.24945	0.124328	4.05311	4.52356	3.13258	3.63343	4.10182	1.79077	0	4.88606	1.88362	3.61235
ELOVL1	0.0644112	7.59522	4.86096	5.66164	5.20006	6.05788	6.53294	4.44758	6.59917	6.20203	5.28059	5.15462	6.79012	5.77926	5.93829	5.45615	7.77255	6.34926	6.30524	6.41971	6.2604	7.49498	6.84812	4.90641	5.88728
SPI1	-0.248365	7.40684	7.44584	6.92801	7.35641	6.92351	6.13114	7.01257	6.72656	6.4645	7.56674	6.89008	5.36422	4.76553	7.69565	7.50526	5.80993	8.28156	7.58188	6.02303	6.45121	0.0703893	5.04089	5.81737	7.15056
ZNRD1	0.479445	4.3505	5.16471	6.77017	6.10203	6.18567	6.27873	7.55444	6.18547	5.49697	5.24982	6.11873	6.1914	5.92362	5.82579	5.48929	6.3918	7.2948	6.44874	7.795	6.76938	5.81198	6.41988	7.52246	6.62644
ZBTB11	-0.0163143	3.65421	2.96532	3.22959	3.70155	3.18903	4.06178	2.23266	5.40361	4.15299	3.46728	3.16993	5.8679	4.89579	2.49825	3.43429	4.25399	4.08916	3.63343	3.35332	3.37295	3.05832	4.70155	3.58496	2.16993
ATXN3	0.0589352	3.32912	3.28688	3.68482	4.15623	3.72901	4.24641	3.88166	3.41278	4.01078	3.74416	3.66221	3.42492	4.01078	3.5008	3.7148	4.35544	3.44758	4.42626	3.35614	3.53232	3.6893	4.31687	5.08321	2.55827
GOLGA5	0.0492898	4.55704	3.70377	3.926	4.18982	3.54226	3.79181	3.75596	3.78973	3.83086	3.69711	3.87873	4.04439	4.30232	3.37851	4.20398	4.49378	3.79805	4.80941	3.45022	3.99458	4.76553	4.16752	4.51349	3.64962
LRRC40	0.138932	3.62176	2.93546	3.52857	3.71149	3.7148	3.85499	2.5008	4.24413	3.96162	3.02326	3.9991	4.99594	4.08406	2.74631	3.60526	4.87578	3.42223	3.88947	3.852	4.33056	4.61471	3.69265	3.55213	2.89142
ISOC1	0.0994566	3.66221	3.15218	3.5008	3.72683	4.0635	4.71149	2.11103	4.44427	4.35685	3.1811	3.28244	5.75676	5.12184	2.46989	3.41549	5.49217	5.11228	4.8802	4.45746	3.09085	4.41346	4.24945	4.99865	2.02148
TRMT11	-0.016759	4.01525	2.9486	4.74093	4.8339	4.79701	4.36107	3.11103	4.41954	4.08831	3.38128	4.20242	4.92315	4.17073	3.24945	4.31325	4.59694	4.90833	5.34625	3.82273	4.26228	4.73552	4.28096	4.87431	2.41143
THUMPD1	0.0426585	4.35544	3.23573	3.6017	4.13011	3.96532	3.70708	3.15381	4.28392	3.21723	4.20789	4.22497	5.28059	4.47184	3.08746	4.45022	4.88069	4.1127	4.25626	4.67807	3.87971	4.38198	5.03474	0.992768	3.85898
MSANTD3	0.236501	3.7366	2.30159	1.81147	3.39643	3.35755	4.19771	1.26903	3.23113	3.63227	3.04089	3.04089	3.36177	3.87086	2.15704	2.59216	3.68818	4.30378	4.38128	3.42089	3.07211	5.68874	3.24641	2.53605	3.52982
ATG2B	-0.0963361	3.23419	1.7137	2.46728	3.5008	2.75702	2.62527	1.65992	2.55336	2.82375	2.70487	2.49825	2.66448	3.22033	2.0036	3.03914	3.18269	2.47508	3.36457	1.92979	2.80735	2.48543	3.6837	2.18269	1.62761
ARFGEF1	-0.156687	5.07682	4.765	5.85225	5.33593	4.14568	4.77821	4.05658	4.75969	4.19377	4.51286	4.21568	5.51475	4.46467	4.35262	5.48768	4.67016	5.57622	4.92932	4.14649	4.54226	3.95047	4.39163	4.41886	5.21956
ZFAT	-0.309688	3.24336	3.21257	3.11603	2.84197	2.12433	2.56071	2.11437	2.6893	2.87381	2.48027	1.33914	2.68706	3.08746	2.55827	2.94486	2.97085	3.11437	2.70266	2.42223	2.41684	2.59455	2.41414	3.33771	1.98914
MTFR1	-0.172533	4.76182	4.10266	4.37016	4.33056	4.04527	4.45549	3.05137	4.03562	4.66789	4.39643	2.75916	4.9982	4.09677	3.42895	5.29205	4.69042	4.48736	4.15866	3.11936	4.37226	4.81198	4.26228	4.64789	3.04089
FECH	0.150942	4.3147	3.32337	3.50208	5.09761	3.55336	4.67638	1.52607	6.30067	4.23955	4.89772	2.75489	6.15704	6.73796	3.56316	4.44095	5.92647	4.62176	5.31325	3.90977	6.21237	4.17313	7.67652	2.80941	2.91265
MYO9A	-0.0345939	2.65992	1.20163	1.76553	2.76341	2.40599	3.1375	1.12433	2.90111	2.68482	2.0072	1.38957	3.21723	2.79286	1.94486	2.36177	3.04789	2.14731	3.08576	2.24489	3.17632	3.02148	3.13586	1.31615	0.641546
DDX3Y	-0.317565	6.08874	5.26303	5.65735	5.75221	0.0426443	0.0565835	3.94205	6.72887	0.0976108	0.15056	4.61471	7.17532	0.15056	0.713696	5.13175	7.91355	0.214125	5.54628	4.8485	0.0703893	6.40429	0.0143553	0	0
PFKP	-0.0619471	5.54689	6.34536	5.60407	6.18249	5.22535	6.99899	4.70984	6.84486	5.95861	5.56773	4.2149	7.02026	5.75489	7.04166	5.31325	6.65033	6.3906	6.18031	5.23189	6.33503	6.95699	5.62819	4.93782	4.88996
IDI1	0.184538	4.95233	6.29517	5.68762	5.37747	5.3107	6.94498	2.90304	6.4573	7.35975	5.90135	3.926	6.95268	4.54288	4.13011	7.33753	6.9607	6.64976	6.24394	6.46205	6.5818	4.62293	6.59783	4.89191	6.61603
SP100	0.234346	4.93499	4.20945	4.53232	5.6476	5.19731	4.22265	4.68257	5.31687	3.21568	5.13093	3.64501	5.58015	4.904	4.14568	4.76607	4.39575	6.03254	5.2384	4.78346	4.95513	6.09824	6.21374	5.12391	5.10685
KLF6	0.0844179	2.45418	2.35332	3	3.48543	3.28983	3.97728	2.51602	1.852	4.05224	3.5741	3.39369	1.36737	5.05658	4.07125	3.78136	2.35614	2.79494	3.92315	2.04264	3.84298	6.89276	2.61353	1.1635	2.42761
TRAM1	0.194321	6.07831	5.0009	6.84524	6.2384	5.10601	5.62088	4.41278	6.18686	5.82731	6.45713	6.00428	6.72438	5.58916	5.23458	7.47792	6.49009	6.25852	6.93664	5.88801	6.05398	5.3906	5.94883	5.40565	6.3345
TNFRSF1A	0.016359	6.00383	5.98709	5.9357	6.13627	6.5331	6.74604	4.35685	4.90881	7.17582	6.02414	5.74443	5.62029	6.17213	6.38698	5.95047	5.92339	7.57871	7.29609	5.82934	6.2447	5.9148	5.66534	5.23458	5.67864
STOML1	0.0280777	2.39232	2.25701	2.08746	2.27202	1.70044	1.37851	1.8679	3.38957	1.60407	2.49825	1.46467	2.87184	2.85997	2.62293	2.56316	1.73118	2.07039	3.12433	2.16027	3.29425	3.18903	3.12928	1.78241	0.978196
PKM	0.0801901	9.15236	9.10593	8.99949	9.37899	9.34394	9.71911	8.17857	9.59653	8.31583	10.3104	7.93275	10.0456	8.41714	10.397	10.0222	10.0681	10.484	10.6274	8.61449	10.3497	10.7839	8.91633	6.84122	8.97974
DHX29	-0.0710512	3.97636	2.87381	3.24184	3.36597	3.65421	3.68482	1.90689	3.23266	4.25626	2.98185	3.27501	3.93829	3.93829	2.02857	3.32048	3.853	2.82171	3.18903	3.42089	3.11936	4.67073	3.10098	3.43962	2.98368
DNTTIP2	-0.302485	5.92101	5.34447	5.0237	4.76871	5.45779	5.33593	5.64847	5.92291	5.4353	4.65249	4.84398	6.50303	5.30889	3.82171	5.06393	5.6097	5.7845	5.11103	4.98003	4.57713	5.1416	5.0505	5.42794	4.7148
METTL22	0.126865	4.49506	3.75489	3.60999	4.29278	4.74524	3.17632	3.95699	4.25776	3.0072	4.08576	4.03826	3.71589	4.16832	3.77083	4.0036	4.05745	4.41481	4.64674	2.96901	4.13422	4.84097	4.96255	4.69766	4.02326
TP53BP1	0.0910929	4.47962	3.23113	3.19692	3.85	4.44493	4.72629	2.87578	4.23726	3.13586	3.61471	2.90304	4.67243	4.74093	3.74846	3.87676	4.08491	4.43563	4.55827	3.25096	4.19849	4.73877	4.8505	3.83491	3.37851
RRP15	-0.231981	4.81147	2.42223	3.03738	3.46728	4.44824	2.78241	1.47508	4.43696	3.46467	3.27352	2.13093	3.97453	4.22728	2.7137	2.49825	3.13422	4.77821	3.73552	3.30451	3.29572	3.19061	3.83289	2.85798	1.76977
RHOA	0.0230617	8.96613	8.84709	8.44857	8.91373	8.77495	9.06891	7.96936	8.76977	8.65295	9.00149	8.48281	9.14723	8.80658	9.3533	8.98294	8.54083	9.80101	9.14962	8.60303	9.21072	8.7002	8.90328	7.96723	8.58459
DHX8	-0.106771	4.88118	4.14568	4.39575	4.69988	4.60703	4.39506	4.26303	4.95652	4.40327	4.22805	4.29572	5.1815	4.774	4.34199	4.7252	4.34908	5.48382	5.19061	4.4489	4.16993	4.07296	4.77347	4.18349	3.93923
IARS2	-0.304931	6.76155	5.34092	5.5549	6.98527	5.94462	5.65535	3.30451	5.66619	5.41616	5.65335	5.12267	6.43179	5.48059	5.59455	5.65163	5.63923	5.92196	5.84147	5.32012	6.5738	5.92742	5.47994	4.50589	4.25248
IDH3G	-0.292861	6.1266	6.00742	5.66107	5.29131	5.81686	5.83112	5.39403	5.54967	5.22997	6.01279	5.17393	5.16148	5.79103	5.74927	5.69014	6.57592	6.16591	5.79805	5.37295	6.27221	6.08002	5.33914	4.85499	4.77189
ROGDI	-0.249811	5.82324	5.53947	3.89239	5.41143	5.16027	4.27575	5.24793	4.11353	3.2555	5.76075	4.07382	3.6241	5.51665	4.67864	5.23688	3.95791	5.74066	5.90135	2.25399	5.35085	3.0054	5.97269	1.97453	4.66505
ROCK1	0.0348716	4.54288	3.54102	3.92979	5.02813	3.99458	4.11936	2.28983	4.68426	4.59515	4.14731	4.20945	5.47411	4.33485	3.44758	5.03342	4.15866	4.72901	4.98231	4.08746	4.1914	4.60644	4.56742	3.10434	3.67694
CBFB	-0.234756	6.13134	5.04177	4.94579	5.65048	6.07468	5.86691	4.72683	5.33163	5.19417	5.21645	5.41312	6.35667	5.67469	4.87332	5.5008	6.23496	5.55704	6.45055	5.58436	5.05181	5.39951	5.90569	4.70708	3.9607
PDK3	0.221457	1.95977	1.39506	1.38405	2.16993	2.04614	2.18587	0.604071	1.35614	1.51096	2.70708	1.52607	2.42492	3.15543	2.52607	1.87184	2.41414	2.66676	3.26303	0.613532	3.04789	1.09761	2.9855	2.41143	1.35614
HYAL2	0.0950276	3.83794	3.0268	2.88753	2.75061	3.91456	4.61589	2.15381	3.92029	4.04264	3.35191	2.11437	4.08066	3.83693	3.01257	3.48027	4.03914	4.34554	2.68706	4.12598	3.75275	5.79077	4.72574	3.70708	2.35332
HDAC4	-0.265854	3.65191	2.72465	2.19535	2.63459	3.16832	2.03914	1.18903	2.14078	3.01792	3.27202	1.28096	2.41143	2.18587	3.42492	4.06091	2.53605	4.01614	2.66903	1.28688	0.0426443	2.58976	3.24489	0.903038	1.28688
RASSF1	-0.0246744	5.42828	6.55075	5.97384	6.42895	5.81967	5.54133	5.30122	6.81941	5.33307	5.33771	5.32948	6.09381	6.1373	6.27408	6.7256	6.08044	6.98709	6.7021	5.66192	6.71589	4.26003	6.75034	4.89627	5.28021
IFI35	0.0518354	4.33056	3.45418	3.92695	4.5097	1.65535	1.9222	4.29646	3.86096	2.31325	4.22033	4.10014	3.9991	3.08406	4.29866	4.60644	3.36177	5.02591	4.75969	3.88264	2.01078	4.24641	4.05485	2.70044	3.62644
HEATR6	0.095795	3.39506	3.32912	3.0321	3.54226	2.35896	4.6893	2.86592	4.66789	3.79909	2.89918	2.852	4.93168	3.34625	3.32337	3.27798	3.36036	3.7366	3.34767	3.2854	3.03738	3.93829	4.23649	3.16832	3.51349
COASY	-0.445494	6.10329	6.24793	6.00068	5.78267	6.20379	6.58135	6.54736	6.21354	5.3565	5.79025	5.26416	6.1639	5.9521	5.52011	5.75087	5.96717	6.71891	6.01257	5.0691	5.89772	5.28688	5.75702	5.92695	5.15906
PLEKHH3	0.200662	2.854	2.58976	2.51349	0.831877	3.60881	1.29278	3.774	2.04264	0.713696	3.69933	2.79286	1.71809	2.70708	4.79077	4.1102	2.89724	4.49442	3.58015	1.67807	3.31034	3.9855	4.21335	2.13093	2.06005
MEF2A	0.220506	3.41278	2.62761	2.99458	3.04439	4.47508	3.84699	2.08746	5.22188	3.87873	3.35332	3.31904	5.74362	3.56803	2.86987	4.13668	3.65306	3.37851	4.23113	3.99548	3.54597	4.20163	3.75702	3.35332	3.57046
OTUD5	0.216592	4.5373	4.51854	4.33485	4.5552	5.36912	4.42626	3.68482	5.478	4.64559	4.9279	4.11936	4.95884	5.40871	4.67525	4.61471	5.21451	4.73769	5.03034	5.33593	5.26115	4.89724	5.61353	5.29278	3.90785
TFE3	0.155744	4.26454	3.77821	3.55336	3.70266	3.93923	3.39643	2.93546	3.44493	2.87578	4.72465	3.48414	3.30889	3.82477	4.59753	4.33342	3.8268	4.7703	4.94486	3.94673	4.21412	4.24413	4.16108	3.3799	3.51979
TBC1D25	0.0357699	2.60644	2.89336	2.88362	3.22342	3.29866	3.21723	1.89918	2.774	3.07382	2.37573	2.06005	3.02148	3.04614	2.75489	3.03914	3.04614	3.24641	3.08746	2.85997	3.3147	3.73118	2.76765	3.32193	2.10769
INPP5A	-0.243815	3.35614	4.40463	3.50335	2.93923	4.52669	3.04614	2.54597	1.91073	3.61941	3.60288	3.36036	1.64155	2.95047	3.46728	2.6893	3.75382	4.18587	3.35614	2.54844	3.54473	3.07039	2.54844	2.09085	3.39506
GPKOW	0.0910516	4.34412	4.15218	4.10518	3.95884	4.24565	3.47897	2.57046	4.09508	3.60881	4.23113	3.90111	3.8953	4.09761	4.40122	4.33557	3.68818	4.79701	4.35544	5.19849	4.71864	4.28466	4.97085	4.33557	3.02857
GRIPAP1	-0.468345	6.25626	5.71891	5.60674	5.45187	5.60555	5.02768	5.0018	5.34199	4.90448	5.86691	4.75596	4.94953	5.24982	5.50843	5.94579	4.52857	5.68032	6.28799	5.14486	5.84423	4.38405	5.73363	4.72738	3.82069
FTSJ1	-0.0155562	5.11894	5.22265	5.0054	4.765	5.19889	5.51475	4.58556	5.01123	5.25248	5.02901	4.93404	5.39266	4.90304	4.51096	5.02724	5.32229	5.48285	5.57016	6.06824	5.88996	5.70984	5.26416	6.06566	3.53232
PRR11	-0.0887004	5.5292	3.76022	4.14078	5.60555	4.45746	5.75782	3.50208	5.44361	5.46041	4.49249	4.18903	6.10161	5.15826	5.8711	4.48478	4.80993	4.67299	4.9486	4.05745	5.10978	6.57788	5.17911	3.4019	3.50208
ATP11A	-0.156801	4.62234	3.53481	4.31179	4.64616	4.84549	4.28466	2.45418	4.49761	4.69655	4.32841	2.92979	4.15462	4.9222	4.42425	4.97499	4.488	4.69153	6.53869	3.05658	4.89724	3.50208	6.24317	2.17951	1.54597
POLR1A	-0.217194	4.12102	3.32048	3.62994	3.30743	4.42223	4.45483	2.09085	4.46009	4.2211	3.42089	2.36737	5.02059	4.38888	2.88362	3.49697	4.65363	4.21956	3.88947	3.50208	3.45418	3.66448	4.54473	3.31615	1.50589
LAPTM4A	0.526015	5.46956	5.86071	5.4822	5.31325	5.55919	6.52748	4.06091	6.69697	6.4707	5.99435	5.56377	6.73254	6.15725	6.10014	6.11166	7.39395	5.84097	6.47281	7.14456	6.81877	8.02092	7.45713	5.63227	6.93699
TTC7A	-0.540194	7.26959	5.74201	5.83946	4.88215	4.95	4.46663	3.61706	2.24489	4.62527	5.45516	3.22188	2.04614	2.93168	4.52168	6.42055	3.39232	4.46597	6.06523	1.57531	5.41954	3.56803	3.37851	1.43829	2.9222
IP6K2	0.183127	6.11437	6.01279	5.29682	5.41075	5.18745	6.47541	4.76235	5.27016	6.4121	5.37816	5.49921	5.55397	6.42794	5.615	5.83946	6.13689	6.58586	5.97499	5.9191	6.10999	5.96809	6.22824	5.89385	5.65306
SRBD1	0.636451	2.77821	2.35896	2.68482	2.34199	3.49313	2.73985	2.26003	3.69265	3.34199	2.86196	3.33485	4.17313	3.3505	2.13422	3.41549	3.92315	3.97361	4.1177	3.99729	3.01257	3.37851	4.02059	3.51728	4.48736
KIF2A	0.158618	4.56377	3.63807	3.76341	4.58676	4.94251	5.26078	2.70487	5.1127	5.08194	4.2426	3.94486	6.04418	5.66391	3.57168	4.41549	5.27836	4.12763	4.80684	4.62936	4.22265	4.99277	4.18982	3.98641	4.80684
RASGRP2	-0.145422	7.16662	6.92517	7.17383	7.24878	7.80096	4.28096	5.76155	6.9154	5.15462	5.79025	3.48929	6.13545	5.73173	7.09107	6.98868	7.05842	7.51452	6.92041	6.09424	5.78607	0.757023	7.68699	7.08789	6.51948
PSME4	-0.000990793	4.851	4.79181	4.854	4.51728	5.4121	5.33199	4.2032	5.30779	5.35966	4.23726	4.15623	5.97797	5.07639	3.29572	4.57471	5.5509	5.21023	4.66221	5.20906	4.87627	4.64904	5.18309	5.14608	4.79546
IFT80	-0.364713	4.40463	3.63923	3.7148	4.81301	3.47379	3.94298	3.41278	4.37086	2.96162	4.79181	3.9486	4.93216	3.93074	2.62761	4.90833	3.2854	2.75916	4.02326	2.64616	3.29719	4.39094	3.90977	2.82985	2.46728
SIRT2	0.255782	5.04614	5.56955	4.99955	4.77768	3.46205	4.14078	3.38267	5.08831	4.2891	4.79909	4.96855	4.16027	4.86096	5.11353	4.99684	5.19731	4.98322	5.88411	5.06091	6.58691	5.68257	6.27314	4.7703	4.78084
ERLEC1	0.0122701	5.00675	4.0635	4.44228	4.55152	5.1035	4.8505	2.76765	4.79077	4.70819	4.14893	4.52607	5.05832	4.23419	3.40327	5.20281	4.30012	4.41143	5.37016	4.3799	5.11728	5.84298	4.88069	3.93263	4.1635
PITX1	-0.191389	2.1177	7.34625	0.0285692	7.06921	3.03562	5.05311	0	5.15826	1.3505	0.0426443	2.31615	6.33628	6.35544	0.0703893	0.176323	5.17951	3.93357	0.0840643	2.45943	2.73985	4.67243	4.59872	2.66448	0
NUP133	-0.311354	5.32625	4.14323	4.26303	5.54689	4.29866	4.19298	3.53978	4.31397	4.48993	3.89239	4.01257	5.22805	4.41549	3.78031	4.28021	4.54905	3.74953	4.36737	4.58376	4.85	3.87184	4.60999	3.6893	4.08321
NUCKS1	-0.33201	8.16807	6.0268	5.61383	8.0348	7.66448	6.9855	7.17971	7.42148	6.52904	7.19111	6.19081	7.46744	6.68131	6.27445	6.55949	7.03738	7.18349	7.94953	7.05918	6.68229	6.55182	6.77452	5.88874	5.6476
VPS35	-0.040933	5.54411	4.6094	5.17313	5.83946	5.97154	6.10098	3.7761	4.75649	6.16772	5.91815	4.36597	5.45779	5.70681	4.56986	5.54782	6.05658	5.28207	5.91456	4.70819	5.71617	6.30214	5.8999	4.44956	4.56986
DNAJA2	-0.155405	5.44559	5.13668	5.09845	5.43162	6.14303	5.45385	4.37504	4.96671	7.31442	4.8885	5.01926	5.34767	5.24565	5.03606	4.98368	5.56255	5.44261	5.56529	5.07211	4.77505	5.5549	5.29902	5.75195	4.40054
BCL3	0.358707	1.33342	2.17632	2.3978	2.55336	1.68257	1.79494	2.29866	3.59932	0.887525	1.83592	1.53605	2.1635	1.1635	3.19692	2.67582	3.41684	3.52356	2.65306	1.84398	2.22651	3.67356	4.11936	1.99277	2.53356
KCNAB2	-0.423152	7.59872	6.9743	6.68958	6.31886	6.99887	6.41278	5.29168	6.57728	5.52576	6.52982	6.6595	6.34837	3.33056	7.55228	7.42585	3.09255	8.40888	6.8813	4.58736	7.9571	2.76129	4.56742	1.3505	4.20633
GAL	-0.489247	5.59962	4.67073	5.17393	0.0976108	7.93834	2.52105	2.55582	4.4522	5.34199	4.39712	0.799087	3.0036	4.54967	3.25096	2.60881	0	0.400538	0.0426443	0.62293	4.59694	0.695994	3.08916	5.27984	0.250962
CLEC2D	-0.069654	1.47508	3.96347	4.33128	5.23764	2.50843	0.485427	3.75061	2.07039	0.895303	3.8953	2.6893	2.7137	2.62059	2.7137	5.37226	1.67807	3.69599	3.78869	0.918386	3.50716	2.19219	2.84599	2.96162	2.0072
FUNDC1	0.584074	0.201634	4.75328	3.849	4.03738	4.68089	4.71754	4.38405	4.43829	4.37156	4.45746	3.81967	4.91456	4.78503	3.65306	4.34341	4.23189	4.81609	4.80684	5.62088	4.70377	4.4614	5.23993	5.73471	4.37086
ATP1B3	0.0554618	6.52935	6.90038	5.83238	6.21975	6.84474	6.79416	6.32463	7.10675	6.77202	6.97143	6.04221	7.5691	6.57213	4.89433	6.72397	6.58015	7.76275	6.20614	6.79077	6.28651	7.23295	5.83137	6.3411	7.11676
NEDD4	0.409646	2.54597	0.739848	0.704872	1.7137	0.411426	3.94111	1.32193	4.23802	3.76341	1.57046	3.18269	4.70321	2.67807	1.44361	0.650765	3.75382	2.97636	4.15381	3.1177	3.46597	3.73444	4.63865	1.87578	3.30012
PIGB	-0.300127	4.65076	4.2891	4.63865	5.95699	3.91361	4.00899	4.79129	3.77821	4.13011	4.40395	3.85	4.14486	4.05658	3.68594	5.14568	4.30451	4.66789	4.04789	3.42358	4.84699	3.13914	3.8748	3.72792	4.37712
MAPK6	-0.249987	5.31288	3.76341	4.03034	4.52482	4.74578	4.52231	2.31325	4.93734	4.1102	3.59813	3.8125	5.76474	3.87283	3.79909	4.21568	5.20359	3.60288	4.39712	4.34837	4.54473	4.14405	4.46663	3.9644	2.7137
GNB5	-0.232361	5.07339	3.53978	2.79077	5.03254	4.55213	3.23573	2.35614	3.83693	0.545968	3.36317	2.30159	4.79649	1.36177	4.73227	4.22651	4.25096	3.34483	4.61471	2.32481	4.30012	3.96347	2.29572	0.713696	3.14405
RAB27A	-0.0875179	5.93357	5.63023	4.45022	5.29902	4.91409	3.79494	3.77716	2.19535	4.66448	6.05355	6.18309	2.65535	4.21801	3.96717	6.13566	5.57259	6.18488	6.37539	1.07039	6.26285	2.84398	3.75916	4.11603	5.52795
HDHD5	-0.199055	5.24527	6.05875	6.0648	6.36247	6.15644	5.54535	3.40054	0.0976108	5.02989	5.77716	4.21335	0.124328	4.73877	6.50048	6.02967	4.93499	6.73444	6.16531	0	5.24489	5.17313	0.516015	3.38267	5.25701
UFD1	-0.288035	6.14098	6.27482	5.96602	5.43095	6.6953	6.93003	5.16912	5.80503	6.05224	5.40122	5.27352	5.83996	6.25475	5.41785	5.24679	6.11395	6.50287	6.60541	6.09719	5.30779	6.1639	5.70432	6.20789	4.90689
PHRF1	-0.116784	4.63401	3.86987	3.91839	3.9486	4.27575	0.0840643	2.66448	3.49825	4.22419	3.79181	2.72901	3.84398	4.35614	4.24184	4.04089	4.1035	4.27724	4.05485	2.83996	3.80323	3.51223	4.67807	2.96532	2.37295
ELP1	-0.317974	5.12474	5.37608	4.97269	5.42021	5.19928	5.52951	2.9222	4.42223	5.17951	4.88215	4.37921	5.09845	5.03782	4.15137	4.94486	5.07296	5.41954	4.9514	4.29425	5.39197	5.25399	4.75756	4.23955	3.58976
NUCB2	-0.140597	8.28951	7.38879	8.30848	8.32463	8.67274	6.42727	8.38556	5.47606	7.52058	7.79357	6.54921	6.10538	7.65935	6.12701	9.42932	6.08087	8.69697	8.94629	5.95582	8.50351	6.47151	7.89912	6.32805	8.10852
DAPP1	-0.136471	3.73335	1.51602	2.54844	4.64962	2.35614	0.333424	2.07382	1.13093	2.74631	4.03562	4.1035	1.26903	0.0565835	1.67356	4.02945	0.0143553	3.24336	5.22458	0.238787	1.36737	0.0285692	2.51854	0.713696	3.15056
SLC44A1	-0.385265	6.36912	6.23993	4.59694	4.95884	3.09424	2.01436	3.33914	2.85599	0.344828	4.93593	2.30743	4.16672	2.16993	1.41684	5.60792	2.46989	4.92884	5.04658	3.21101	3.63807	4.9982	2.15056	0.9855	3.66448
TMEM260	-0.227795	3.73444	2.84197	3.09424	3.57531	2.30743	2.66903	2.38405	2.86592	3.40327	2.93734	2.852	3.26903	3.29131	2.57531	3.38267	2.5008	2.8953	4.11603	2.50589	2.5435	2.26003	3.19219	3.02326	2.52607
SMG6	0.113506	2.5435	3.70487	3.22342	3.10098	3.40871	3.04439	2.83996	3.67807	2.53605	3.11603	1.74846	3.57773	4.31904	3.84499	2.40054	3.70155	2.65306	3.82375	2.926	3.38128	3.22959	4.1416	3.16832	2.97085
EXOC5	-0.0235444	4.77505	3.5656	3.71039	4.48543	3.97636	4.78712	1.98914	4.16027	4.44095	3.65421	3.80632	5.08108	4.44493	2.87774	4.23955	4.63401	4.40259	4.75649	3.53978	3.52857	4.20789	4.95745	4.01257	3.51602
CLTCL1	-0.500412	6.04418	5.52513	4.67299	5.93145	5.04308	0.613532	3.8166	0.83996	2.7137	5.08704	3.8846	0.782409	0.815575	4.62117	5.24527	1.3505	3.72683	5.46923	0.356144	4.94953	2.09085	0.704872	1.75275	0.847997
FSTL3	0.0180025	3.17632	3.74308	2.02857	2.81762	1.40054	2.23879	1.7866	2.05658	2.53854	3.68032	2.48027	1.9782	1.8953	3.20477	3.04264	3.02148	4.66959	4.51602	0.871844	5.12557	4.80116	1.40054	1.71809	1.88362
DGCR2	-0.0499213	4.72629	4.2765	3.96347	4.1643	4.50271	4.31034	2.98914	3.76447	4.43162	4.51728	3.38681	3.55949	4.21878	4.42089	4.3875	4.20006	4.78869	4.8166	3.95047	4.38336	4.22959	4.73715	3.18428	4.19849
RNF126	-0.330484	5.39678	5.79623	5.48896	4.848	5.14812	4.56864	3.98459	5.35685	4.83693	5.60674	4.70653	4.71039	5.33307	5.2211	5.04745	5.77215	5.4353	5.89093	4.67469	5.51381	5.00495	4.63865	3.9644	3.97177
MNT	-0.0529002	2.9855	3.39917	3.22342	4.15381	3.08746	3.05485	2.06005	3.68594	2.90304	3.81352	2.05311	3.31904	3.59335	3.46467	3.63459	3.93923	3.20006	4.18666	2.50589	3.47508	3.44228	4.1035	2.21101	2.31904
ZXDC	-0.397673	4.61589	4.07382	3.83188	4.62994	3.87971	3.68032	4.0505	3.61941	4.09424	4.52669	3.86295	3.76341	3.73444	3.81865	4.51033	3.45418	4.56071	5.32517	2.46989	3.86592	2.90881	3.49442	2.33342	3.16832
JMJD6	-0.168891	4.86295	4.61353	4.38128	4.19771	4.62059	5.27575	3.61706	4.93782	4.5373	4.17792	3.46989	4.81352	4.75007	5.31904	4.64212	4.6605	5.45516	4.58736	3.77294	4.17233	5.12184	4.7126	4.32265	3.46205
POLB	0.449575	4.52732	3.66448	4.91695	4.85599	4.9241	4.87725	5.27984	5.06652	4.53543	4.64386	4.69098	5.33735	4.71039	4.46009	4.57713	4.68874	5.29315	4.51791	5.32445	4.80839	5.2709	4.32481	5.37608	5.74147
WIPI1	0.308099	2.50843	2.45943	2.06005	3.07211	2.26303	3.43962	2.57531	5.88215	1.852	3.06523	3.30597	5.11936	4.1235	2.22959	3.73444	2.97453	3.32625	5.43029	2.52607	4.01167	5.54195	3.31904	3.91648	2.56803
GBA2	-0.319191	5.36842	4.73985	4.78084	5.33735	4.74308	4.45943	4.46923	4.88557	4.70929	6.0045	4.75061	4.12928	5.34589	4.51538	5.44526	5.36282	5.43329	5.34554	4.20945	3.83693	4.64904	4.42089	4.37712	3.75916
NDST1	0.161631	2.60407	1.9222	3.30743	4.08491	2.76765	4.38612	1.95606	3.73227	4.6427	3.59932	3.96993	3.53232	2.81967	2.38405	4.41414	4.25701	4.9514	4.66391	0.773996	4.24413	4.88118	3.03738	2.68706	2.62293
ASNS	-0.0317378	3.9514	5.17712	7.08534	4.96162	5.04396	5.17073	7.732	7.51869	5.0036	4.02591	8.08305	5.96324	8.08746	6.92481	5.75889	3.82375	3.04439	7.71966	6.8226	4.92552	8.46271	4.9644	7.30049	1.5509
AP3M2	-0.348351	3.86691	2.96347	3.79805	3.43162	3.71149	4.38612	1.8679	3.75489	4.01167	3.37156	3.60526	4.57046	3.53481	2.74201	3.28096	3.63807	4.05572	4.10182	2.90689	2.73769	3.50462	2.17951	3.2765	1.51096
PABPC1	-0.252788	10.1236	10.2104	10.811	10.7558	9.58003	9.69912	9.94196	10.5858	10.1726	10.0492	10.6421	10.763	9.83346	9.9737	9.75657	9.98014	10.2874	9.54637	9.88961	10.1999	9.74772	8.94266	9.79507	10.3942
CFAP20	-0.0873668	5.61941	4.98094	5.16511	5.35156	6.19279	6.09571	3.88655	5.20006	5.35966	5.15137	4.74093	5.48253	5.54844	5.06091	5.37921	5.33092	5.95606	6.29407	5.19338	5.4957	5.5008	5.21062	5.15421	4.59991
CSNK2A2	0.308598	4.26228	3.80941	3.86295	4.6565	4.94017	5.30195	4.70598	4.71644	4.99865	4.22651	5.36072	4.66221	5.48768	4.78136	4.18349	4.99865	4.49121	5.24451	5.19613	4.66107	5.11728	4.83137	5.28577	3.91552
EIF2B3	-0.160579	5.33307	4.33985	4.98048	4.2765	4.87381	5.00045	3.69377	5.57864	4.56377	4.37851	3.94953	6.01279	5.30852	3.96717	4.40599	6.25927	4.72247	4.53543	4.97591	5.23266	5.60733	4.94953	4.61235	2.96901
TCOF1	-0.32753	5.05875	4.67186	4.77083	4.67807	5.62877	5.5656	4.749	4.98959	4.91217	4.80374	4.05137	5.50176	5.47119	4.39643	4.36737	5.61206	4.91217	4.93829	4.8485	5.10643	5.53201	4.32841	5.20477	2.64386
CDC42	0.358578	7.38267	7.31931	7.50978	7.29159	7.28716	7.75542	6.24641	8.14934	7.65878	7.46663	7.68201	8.76288	7.5004	7.24184	7.38698	8.31985	7.83131	7.69467	8.38042	7.75328	7.88179	8.29347	7.52904	7.64825
OSBPL3	0.0652235	2.09085	1.48027	3.18745	2.65992	3.95699	3.72247	2.67807	2.81762	2.79286	2.27798	2.22959	3.66789	5.615	0.910733	0.432959	3.68818	3.49442	2.63227	1.74846	3.22342	3	3.9542	3.37156	2.16672
RAD18	0.00412626	3.27798	2.66221	2.99277	3.37712	3.7126	3.8846	1.88753	3.40463	3.83895	3.08916	2.7761	4.3978	3.20477	2.4489	3.18587	3.24793	4.09085	3.58736	3.0993	3.9364	3.65306	3.46858	2.34483	2.61589
ATP2B1	-0.0944059	3.40871	3.07211	3.09255	4.08576	4.79546	4.33271	1.848	2.76977	3.91743	2.774	3.00899	3.63575	3.94017	2.50589	4.47508	3.80529	4.01167	3.83794	3.67582	3.10266	2.98732	3.49442	2.44361	2.82782
NCK2	-0.501167	5.68201	4.81301	4.76818	4.46989	5.10266	4.27873	3.36317	3.09761	4.71315	4.82222	3.99548	3.59216	4.40803	5.29168	4.29866	1.98914	4.24641	4.83036	2.13422	4.80993	4.51286	3.18903	1.58496	3.24641
MAP4K4	0.0591566	5.08364	4.80168	4.42694	6.18289	4.91409	5.65421	3.5435	6.37156	5.49089	5.22535	3.76765	6.74133	6.16912	3.89142	4.90497	6.54009	3.37016	5.30268	5.56925	5.30049	8.30465	6.34003	3.94579	4.53481
MGAT4A	-0.0452879	3.6565	1.42761	0.669027	3.13093	4.25927	2.94486	1.40599	0.443607	3.68818	3.04264	3.15866	1.35614	0.0703893	2.0321	1.59455	2.91648	5.16189	4.04002	0.799087	2.9542	0.137504	2.75061	0.321928	3.12598
RPL31	-0.174435	12.1357	11.9901	12.3078	12.5198	12.255	12.2683	12.2363	12.457	12.8492	12.0865	12.5441	11.9853	12.3159	12.901	11.9962	11.9437	10.5447	12.004	11.7311	12.6875	12.0889	11.2531	11.121	12.6183
WDR1	-0.0717175	7.72356	6.51995	6.6327	6.92113	7.33735	6.62615	5.03386	7.63583	5.79103	7.19042	5.56468	8.18294	7.4302	6.97808	6.774	7.09191	7.00304	7.53255	7.02791	6.87197	7.31089	6.94603	6.31343	6.20926
SNX13	-0.293187	3.44493	2.40327	2.53605	3.72901	3.33771	2.72247	1.66903	2.30743	3.27352	2.96717	2.94111	2.87774	2.68257	2.40871	3.28983	2.54844	0.400538	2.66676	2.31325	2.87578	3.23113	3.08746	2.64847	1.72247
ING3	0.0339631	3.74093	3.43829	4.07895	4.3147	4.56621	2.68482	2.90497	4.05832	3.60881	2.62293	3.24184	4.46663	4.81609	4.37016	3.66562	4.51033	4.34908	4.61824	4.41481	3.1375	3.64731	3.25399	4.68313	2.76765
VASH1	-0.0697274	3.0321	3.38957	1.80323	3.61353	0.555816	4.37156	0.910733	4.1819	3.16993	3.19535	2.07724	4.08491	0.941106	2.58015	3.49057	3.84699	1.24489	4.39438	1.91456	3.15704	1.82782	2.09761	2.65535	2.29278
BUD23	-0.0755564	6.88435	6.16088	5.98709	5.46041	7.58489	7.0635	5.59842	6.73173	6.29627	7.67814	6.3014	6.28429	6.68832	5.97591	6.14995	6.80349	6.91025	7.79286	6.79155	7.22978	6.18824	7.17632	6.85761	4.65249
SEL1L	-0.00594469	5.02104	3.30743	3.77083	4.48414	3.91169	4.40803	1.87184	3.96255	4.21179	3.59813	4.47897	4.07039	5.05137	3.5741	4.40122	4.45549	4.17552	5.78031	3.72901	3.6565	3.98368	4.51854	3.58496	3.41007
TRIP13	-0.0512658	4.97361	4.25172	4.07639	4.60051	5.69265	3.88947	2.54102	4.83946	4.65421	5.15137	3.53978	5.95768	4.74039	4.852	4.09592	5.7148	4.34979	4.90689	4.71425	4.39712	4.94017	4.90881	5.04396	2.90304
ATP6AP1	0.168192	7.13597	6.3978	6.18923	6.82324	6.08087	6.16491	5.15502	5.9535	6.11707	6.25607	5.5549	5.14975	6.25493	6.29572	7.40276	6.95919	7.03716	7.15421	6.89785	7.79129	6.83592	7.01078	5.24793	7.03705
TCF3	-0.157864	6.672	7.3706	6.37365	5.84298	5.95629	5.68032	5.31687	5.98048	6.33217	6.05246	5.52638	5.98003	6.8976	6.70127	6.09276	6.5404	6.75515	6.94263	6.46156	6.60659	6.64299	6.48671	5.90809	5.35685
TRIB2	0.360758	2.15704	0.545968	0.124328	2.37573	3.71699	3.36457	0.389567	6.59664	2.12433	0.454176	0.111031	6.15198	5.09043	6.46989	1.1375	5.64847	1.36177	3.53978	6.2666	2.91648	4.2765	7.80471	5.07082	1.76977
DAZAP1	-0.285324	7.04636	7.02203	7.00641	6.53325	6.5575	6.07318	5.99118	7.03661	6.67426	6.67044	5.94462	7.22429	7.04789	6.51948	6.75556	7.09972	7.27612	7.3267	5.95977	7.06652	6.56879	6.44675	5.93381	5.72901
MBD3	-0.43227	6.06824	7.21306	6.43763	5.90761	5.47216	5.29205	5.08194	5.70901	5.91169	5.77637	5.0365	5.53792	5.73552	5.63836	6.18804	5.76235	6.2878	6.44774	4.91361	5.83996	5.85997	5.08874	4.62293	5.37504
HLTF	0.248776	3.76022	2.70044	3.73118	3.72792	4.7666	5.25512	2.1177	6.61353	4.45154	4.36667	4.35614	6.97774	4.85898	2.96347	4.12598	5.26115	4.56925	4.86146	5.37051	4.82324	5.30597	6.19771	4.54844	2.97453
FAM50A	-0.00922304	6.0607	5.66334	4.97315	4.98959	4.51033	5.91886	5.04177	5.46858	5.38578	5.40803	4.76607	4.78712	5.23573	5.73769	5.09677	6.11478	5.85025	5.46336	4.86641	6.29039	6.9404	5.78188	5.34483	4.66903
FAM3A	0.0567427	4.36107	3.90593	3.66221	3.79181	4.29425	3.76235	3.02503	3.93829	4.05485	4.13258	2.98003	3.45681	4.58916	4.41684	4.14241	4.70044	4.10685	4.54102	2.93168	5.23764	5.48027	4.55397	3.79286	3.09085
CPSF1	-0.30073	7.40574	7.36824	7.1642	6.73931	6.38647	7.61405	6.011	7.54874	7.79136	6.70377	5.91958	6.98698	7.44717	6.0365	7.18557	7.16471	7.06824	6.63735	5.27538	7.03276	7.09845	7.04636	7.30131	6.13278
CYBRD1	0.379802	3.26754	3.06523	1.27501	4.66959	3.89918	4.19456	2.13422	4.31976	4.78607	3.38681	3.51096	4.88801	4.07039	3.69265	4.0635	3.61824	4.48285	4.68706	1.852	4.33771	4.72028	5.2384	3.47768	4.31687
PDCD2	-0.028317	6.30396	6.03144	6.62746	6.21179	6.55275	5.1631	7.08289	6.67892	6.23209	5.5738	5.9404	7.01056	6.40786	5.60644	5.58436	7.29682	6.33682	6.08831	6.16892	6.28448	5.81813	5.50335	7.67037	6.03342
RDH11	0.361037	4.72846	3.96532	4.80529	4.59694	4.92505	5.67384	3.40327	5.53916	5.20163	4.21645	4.73931	5.72083	4.93687	3.96255	5.52011	5.77926	4.62702	5.80993	5.54257	5.58916	5.53543	6.25701	5.88874	4.47573
PRKACA	0.485403	4.17313	4.38267	3.98185	4.17712	4.75061	5.39266	3.84097	5.43796	4.31325	5.10308	4.83188	5.61559	5.36212	4.89433	4.84449	4.59216	5.06652	5.6522	5.47897	4.88801	5.54689	6.58165	5.83415	4.26903
ADGRL1	0.0543543	4.55029	2.13422	3.30012	1.67356	1.1177	3.9855	1.65076	3.22805	4.76977	4.15462	2.69377	2.926	2.09761	2.12102	1.96347	4.33414	4.51159	4.82375	2.88362	3.67129	3.76129	5.04396	3.03914	1.93357
ACTN1	-0.144352	7.87566	6.65277	6.46646	6.86716	7.47711	6.57607	3.7126	6.26941	6.12516	6.51885	5.4591	6.7922	7.163	7.5479	6.95536	6.10538	7.74618	8.16682	5.34979	6.88215	7.15634	6.95268	6.09466	5.31759
ZFYVE26	0.114615	2.70929	2.05311	2.28096	2.85	2.44095	2.5008	1.46989	2.02148	2.93357	2.49057	1.81558	2.59932	2.98185	1.97453	3.09761	2.32481	3.59932	2.58496	1.78241	3.67807	1.98185	3.52231	2.86987	1.8679
PTPN18	-0.285828	5.52669	5.10685	4.73931	5.58586	4.98185	4.2555	4.79181	5.33914	5.33163	5.97223	4.95	4.79909	5.84398	4.77136	5.45022	5.51475	5.64241	6.00854	5.04963	4.61648	4.99322	4.96301	4.35262	3.3147
ALDH3A2	-0.351907	3.84699	4.06005	4.05658	4.80012	5.59932	3.89821	4.73335	2.73552	3.68818	7.15239	4.61706	3.41414	0.731183	3.50462	4.48349	4.36947	4.04002	5.51696	2.72028	2.02148	3.51854	4.1035	3.6837	0.400538
TFRC	0.128126	6.06738	6.11603	7.22188	7.13924	7.19781	8.25139	4.02148	7.8802	7.44187	6.24508	5.0237	8.34873	9.47338	2.95233	8.10486	9.86316	6.3733	5.43162	8.98536	4.69711	6.16852	10.2331	7.43996	6.88191
SREBF1	0.0630209	5.31832	6.20222	7.24451	6.22497	6.28059	5.89651	5.40429	6.42559	5.15218	6.18349	5.24184	5.6453	6.64602	5.22381	6.749	6.8387	5.39951	6.60095	5.72492	6.75809	5.6605	8.4138	5.15421	5.90857
AFF4	-0.0304693	3.33914	2.16993	2.09424	3.39506	3.08066	3.85898	1.04963	3.55704	3.90689	2.64155	2.70708	4.1643	4.01703	2.90111	2.80529	3.42089	1.9855	3.63227	2.84599	1.71809	4.63401	3.12763	2.66903	1.70044
UBE2D1	0.357271	1.79077	2.79701	3.40599	3.38819	3.42626	3.02503	2.86987	2.15704	3.35191	3.12598	3.44361	2.95791	2.91456	1.91839	4.41346	3.29572	4.25323	4.0268	3.25248	2.94111	3.50843	2.90497	2.28096	3.72792
MPP5	0.192172	2.69377	1.53605	1.9222	1.73985	2.59694	3.20633	0.443607	2.71809	2.66676	1.82375	1.77821	3.40327	2.77189	1.5008	1.96717	3.54844	2.26003	2.86394	2.42492	3.0018	3.77926	3.48414	2.19849	1.79077
SMC1A	-0.121896	6.58856	4.59156	5.22574	5.97453	6.472	5.94322	2.9222	6.05572	5.87258	5.64559	4.63923	6.32535	6.15846	4.73335	5.88777	5.89142	5.37504	6.92683	6.12226	6.28744	5.10476	6.53076	4.43563	3.97545
HSD17B10	-0.0284976	6.90677	6.13935	6.55167	4.99548	7.61493	6.82668	6.29572	6.09635	6.11395	6.46826	6.08937	6.26435	6.78162	5.76474	6.67948	6.32373	7.28263	6.62073	7.39335	7.58481	5.79233	6.83162	8.01631	4.92315
MARK2	-0.224862	4.79286	3.78241	3.79701	4.33342	4.80219	3.70819	2.27202	4.49442	4.10434	4.03122	3.48414	4.61176	4.38128	4.26529	4.24793	4.06091	4.47314	4.69822	3.65421	3.46467	3.24945	4.37921	3.12433	3.29425
HMMR	-0.231295	5.6453	4.18587	4.87332	5.03914	4.88655	5.34341	3.42358	4.66164	4.82833	4.38267	4.69599	5.96093	5.4941	3.75489	5.3844	5.92884	4.63459	5.35191	4.06437	4.78346	5.89554	3.82477	4.848	2.88362
CHFR	-0.134734	5.56986	4.54411	3.55704	0.887525	4.3512	4.31325	4.00809	5.42055	2.04264	4.91839	3.30451	5.34802	5.20203	0.594549	4.71644	3.51602	4.7666	0.0976108	4.44228	1.59455	3.6837	5.57531	4.67016	4.02768
NFATC3	0.0953489	3.85898	3.41954	3.41414	4.32265	4.68818	3.9364	2.04963	4.7366	4.21568	3.60763	2.93546	4.82375	5.03826	3.57652	3.72683	4.848	4.21801	4.90063	4.13832	3.89821	3.14078	5.01569	2.91265	3.57531
TRNT1	-0.0455699	3.93546	3.98185	4.54782	4.09424	4.68874	5.10098	3.1811	4.71754	4.56438	4.06523	4.09677	5.40633	4.88509	2.9982	4.52482	4.79909	4.96162	4.84599	4.15785	4.21801	4.17712	4.83441	4.19613	3.05658
ACADVL	-0.311374	8.06086	8.71236	8.00579	8.06953	7.28031	7.048	8.05409	7.14057	6.90448	8.29591	6.53107	6.41785	7.91331	7.82203	7.22843	7.82337	7.98402	8.92321	5.08194	7.16259	7.63858	8.36159	7.53986	6.64111
STK10	-0.388753	5.65507	5.27947	5.1102	5.41718	5.8089	4.37434	4.5435	5.32373	4.05918	5.56955	5.0781	4.93734	4.12681	5.7845	4.99594	4.45418	5.51948	5.89312	4.37295	4.75702	3.48156	4.41819	3.38405	4.65134
FBXW11	-0.171465	4.66732	3.40871	3.59455	4.38681	3.99005	4.99729	1.81967	4.0054	4.41549	3.79286	3.98823	4.67976	4.29866	4.09255	3.80839	4.07211	3.83188	4.38888	3.75061	3.90689	5.52888	3.57046	2.9222	2.5656
ACAP1	0.121937	2.43296	5.62994	5.5738	6.07682	6.02768	2.98185	5.83845	6.45878	2.73118	6.96832	5.1206	6.08513	6.62088	4.57107	5.43463	5.80038	6.28448	6.71644	4.9855	6.83453	2.01436	8.164	0.0703893	5.89603
DERL2	-0.134438	4.60526	5.20945	4.86493	4.88801	4.61765	4.62176	5.23458	4.3512	4.11353	4.88166	3.61117	4.53294	4.7148	4.67299	4.33914	5.0197	4.88118	5.44427	3.56682	4.23649	5.00225	5.10559	5.05485	4.41819
NDE1	-0.11753	5.84775	5.30925	5.06738	6.04549	5.45812	5.06867	2.52105	4.63691	3.91552	4.76713	5.10056	5.21994	5.25361	5.89433	5.41346	4.90881	5.51381	6.11541	4.30743	5.32373	6.02481	5.70266	3.84699	4.22265
AP1M1	0.00232848	5.94953	6.37869	5.6585	5.98755	5.80787	5.60703	4.0027	6.02614	5.43829	5.38578	5.66505	5.98937	5.853	5.82883	5.6893	5.7137	6.05181	7.30113	5.77373	6.12226	6.67327	5.68229	5.94134	5.01525
PVR	-0.396297	4.69655	4.07039	3.93829	3.18903	3.37573	3.66789	3.7366	4.393	3.58496	2.53854	1.85599	4.80012	3.90304	3.68257	2.23266	3.8953	4.1375	0.15056	2.73552	4.10014	4.42626	2.98368	2.29866	2.67129
XRCC1	-0.0851134	5.34837	4.92742	4.72356	5.14323	4.86839	5.32012	4.23419	5.65134	4.39712	4.58436	4.73823	5.22843	5.23036	4.77979	5.00764	4.57592	4.93263	5.69655	4.73173	5.36842	5.21296	5.31651	5.19456	4.35473
SCARB1	-0.420261	7.24432	5.64299	5.28836	5.62117	7.16007	6.25248	4.48736	5.54782	5.80478	5.49121	4.48027	6.03496	5.07082	4.67751	5.07168	6.03804	6.17532	5.64097	4.88264	6.04352	4.99141	6.0009	4.46923	5.38509
MCM2	-0.129941	7.1058	6.44079	6.5812	6.60763	7.20438	6.88509	4.46923	7.40276	6.58826	7.53115	6.18844	7.53496	7.06156	6.42072	6.86925	6.2116	7.80858	7.26613	6.61442	6.85773	5.11103	7.07884	5.56682	5.9493
SELENOO	-0.214269	4.15462	5.19101	4.23496	3.5373	4.94953	4.25701	3.88947	3.7366	4.13422	4.73606	3.07382	3.53854	4.63052	3.63691	4.27873	4.13258	4.24565	4.53916	3.30889	4.26379	4.34767	5.39197	3.52607	3.69933
ALPK1	0.0372938	3.21723	2.15056	2.60407	3.91265	2.19535	1.22651	3.02857	2.65992	2.36177	3.40871	3.42626	2.90881	3.08406	2.10769	3.75168	1.1177	3.96532	4.05224	2.24489	3.16993	2.49825	3.06523	1.35614	2.99277
LLGL2	-0.384805	4.78607	3.86394	3.80632	2.94673	3.13093	3.23113	3.46336	2.852	3.9279	4.48736	1.75275	2.46728	0.871844	3.7939	3.97911	4.34127	4.64212	4.36457	1.84398	2.23879	1.55582	5.47606	2.5008	0.238787
PDE8A	0.226149	2.65076	1.83592	1.98185	2.59694	3.16832	3.04089	2.40054	3.34625	3.15381	3.58976	2.87578	3.63227	2.16993	1.46989	2.76977	4.91743	4.04614	3.8125	2.33628	4.57773	2.80941	2.64155	2.44626	2.43563
NLE1	-0.408439	4.18982	4.20398	4.66448	4.774	4.82171	5.14282	3.66448	4.76182	4.20242	3.68594	4.27501	5.07724	4.9364	4.34199	3.61706	4.32409	4.65478	4.01525	4.43095	3.9542	4.49697	4.43229	3.68482	2.26303
SDHA	-0.156776	6.0036	6.8596	6.34678	6.22419	6.94498	5.69488	5.90689	6.16812	5.52888	7.33914	4.9542	6.62425	6.5812	7.13145	6.22168	7.00383	5.70293	6.21587	5.849	6.59842	5.85175	6.87455	6.04767	5.1819
SMARCE1	-0.143176	6.69377	5.91097	6.46842	6.3637	6.8885	7.04952	6.34341	7.17513	6.66761	6.4165	6.10308	7.2077	7.23907	5.80012	6.13258	6.36387	7.46164	6.79194	6.74389	6.29352	2.9542	7.09698	6.2555	5.98071
GSDMB	0.101595	2.12763	2.35332	1.60881	2.08066	3.03738	3.75489	1.926	3.64731	2.9486	2.74201	2.78241	3.93263	3.04963	1.76977	2.80529	2.96901	2.62059	2.87774	0.650765	3.19692	2.41684	4.14486	2.5656	1.97085
KDM5A	-0.0247758	3.30159	3.22188	3.48027	4.20163	3.43563	3.66221	2.25701	4.1914	4.04963	3.75916	3.20633	4.48736	4.20163	3.80012	4.08661	3.63227	3.51979	4.20945	2.86394	3.15866	3.33199	3.97361	2.49825	2.96162
DHRS9	-0.158053	7.1418	0.422233	5.0343	1.87578	5.00854	0.275007	1.79909	0.0426443	2.45943	7.8653	3.69933	0.176323	0.137504	7.93434	0.669027	1.08406	3.34056	3.90977	4.31904	1.09085	1.03562	3.13422	0.748461	3.66448
IGF2BP2	-0.252435	5.93829	5.05224	5.21878	0.163499	3.38543	5.90256	4.45615	5.32085	5.71067	5.88606	2.11103	5.32265	4.14975	4.90881	5.94275	1.07724	1.83188	0.0703893	0.0143553	2.50589	6.93062	4.91361	4.03474	3.80219
MAP3K13	-0.00758444	3.80426	3.53605	3.84298	3.86196	3.28983	0.555816	3.49185	0.464668	0.555816	4.66846	4.03298	0.485427	4.30743	2.72465	3.64155	5.29499	0.799087	0.389567	4.4121	4.08491	4.15381	4.23419	4.48091	2.47249
ST6GAL1	-0.0568482	3.69711	3.45022	3.45943	5.32912	3.50335	4.72738	2.01792	3.0054	4.60703	4.99503	3.24793	3.57894	5.0268	1.852	4.46271	6.02015	4.3512	3.66562	2.85599	4.40122	2.96901	2.90497	3.94767	2.96901
FRY	-0.380575	6.09128	4.69711	5.37156	4.91648	3.28392	2.17313	3.48543	1.37295	1.45418	6.05918	2.48543	1.32769	1.74846	4.47184	5.46041	1.86394	4.80116	5.1823	3.95047	2.80529	0.748461	3.32337	0.0426443	3.23266
PICALM	0.381649	5.67129	4.50906	5.0197	5.73254	5.69961	5.6792	4.13832	7.59515	5.77952	5.61853	5.37955	8.56175	6.80503	5.20672	6.21548	7.99695	5.57713	6.0974	7.61618	4.79181	6.75409	7.81314	6.86518	5.78555
NSF	-0.25371	5.94322	5.0072	4.75862	4.72846	4.89336	5.04658	2.63923	4.83592	4.78921	5.08108	4.00988	5.46826	4.49889	4.55888	5.32337	4.89869	5.49793	5.80426	4.36667	5.47216	4.50843	5.02148	3.488	3.72792
CLASP1	0.00997931	4.15299	3.11437	3.18903	4.25248	4.21257	4.36667	2.45154	4.81609	4.53792	3.851	3.24184	5.33307	4.27798	3.99729	4.18745	4.51033	3.53481	4.81558	3.57531	4.09508	4.17393	4.86245	2.65992	2.90881
MRPS34	-0.333777	7.02824	7.42433	6.94907	6.47768	7.0863	6.14507	6.50827	6.40037	5.58165	6.99548	6.02081	6.07468	6.70169	6.42945	6.50811	7.47897	7.42391	6.21975	5.81506	6.22477	6.77729	6.63241	6.59798	6.16027
CLNS1A	-0.191216	7.38655	7.8759	8.49293	8.73505	8.25795	7.75862	7.31379	8.12008	7.9289	7.26501	7.52544	8.22699	8.32908	7.49049	7.4143	8.12933	7.45656	7.75902	8.60314	7.37295	7.09877	7.27006	7.63438	7.84731
EED	0.122041	4.74147	4.26828	4.49761	4.27798	5.52231	4.89336	3.94017	4.99955	4.29572	4.64616	4.18031	5.96209	4.8334	4.10182	4.64212	6.17911	5.63807	5.19377	4.76341	4.42761	4.72792	5.55336	4.64904	4.06523
TSG101	0.131755	5.44956	5.10014	5.42223	5.42794	5.26153	3.74308	4.84649	5.44659	4.64328	5.03474	5.63633	5.58676	5.77426	5.36842	5.32697	4.59574	5.00405	5.68986	5.80271	4.47703	5.7952	5.62293	5.90953	5.04133
NCBP3	-0.0538725	4.66676	4.7126	5.10685	6.33521	4.31252	3.29572	4.8268	4.46858	3.67129	6.12081	3.43429	4.59813	5.07296	4.43829	4.86047	5.29646	4.79233	5.80735	3.17153	4.97039	3.85699	5.47119	4.15866	4.69153
ATP2A3	0.137068	4.31904	6.00473	5.54195	6.31687	6.43679	5.74416	4.38336	7.3587	6.00495	5.90497	4.66221	6.59425	6.90521	5.08151	5.37365	6.84875	6.14588	7.03419	5.82426	5.71067	0.62293	7.74967	5.71672	6.85699
MGLL	0.270106	1.54597	2.36457	1.80735	0.757023	0.565597	2.35332	0.933573	1.57046	0.713696	4.11853	0.773996	0.790772	0.250962	0.286881	4.45943	3.08576	5.35226	3.5509	3.0054	5.03122	4.17473	2.70929	0.124328	2.26303
BCS1L	-0.317967	6.01167	5.63227	5.79961	5.26604	6.06393	5.61941	6.06437	6.34056	4.69209	5.96185	5.46891	6.41701	5.91552	4.95047	5.77189	5.92647	6.26679	6.33932	5.46074	5.59574	5.79155	6.44923	5.37086	3.34199
DPP8	0.0434625	3.60526	3.01436	3.18903	3.93168	3.6565	4.15866	2.41414	3.93734	4.13996	3.41278	3.6311	4.07211	4.0009	2.5435	3.68706	4.15947	3.44361	4.47249	3.33342	4.12516	3.15218	4.06091	3.14078	3.03738
SLC24A1	0.28337	2.40871	2.08746	2.27501	2.35614	1.61824	2.44095	1.76977	2.32769	3.02857	2.926	2.94111	2.4489	3.33056	2.33056	2.70487	2.26003	2.38681	3.90497	2.488	3.60526	2.94111	2.12763	1.47508	2.73552
SCARF1	0.348161	1.30451	0.799087	0.432959	0.948601	0.0703893	3.17792	0.516015	4.54844	1.96347	0.250962	0.0565835	4.36317	2	0.400538	1.1177	4.95884	3.14241	2.89724	3.06005	0.356144	0.0565835	5.44228	1.73985	3.53232
LMAN1	0.0299945	5.70984	4.11103	4.81352	5.45549	5.07639	5.79649	3.21568	5.67582	6.26059	5.05918	3.97728	6.32247	5.35368	4.53916	6.23707	5.94322	4.32265	6.14078	4.78764	5.80349	6.23285	5.94977	4.90545	3.83491
HACD3	0.208089	4.59276	4.91982	4.4822	4.48993	6.05702	5.93899	1.79494	5.25776	5.89045	4.9644	4.68818	5.77321	6.03056	4.02591	5.04527	5.93428	4.69098	5.08958	5.55397	6.16007	5.96602	5.6879	4.94205	4.75168
ZZEF1	-0.13701	3.2765	3.19377	3.23573	4.37086	3.16993	3.14078	2.26903	3.44493	3.41684	3.71809	1.852	3.52482	3.89433	3.42761	2.79909	4.30816	2.74201	4.28244	2.30743	3.30597	2.82579	4.57471	2.26604	2.25701
ENO1	-0.0109056	10.6027	10.635	10.9664	8.89011	11.0649	10.9405	9.46322	11.0711	10.3638	11.1538	9.88073	11.4175	10.3317	11.4348	11.0859	11.2967	11.1087	10.7235	10.5365	11.2294	11.3992	9.80171	9.66359	9.75206
MYDGF	-0.314091	7.91701	8.06053	8.15117	7.19219	6.97005	7.26087	6.17413	6.34767	6.79325	7.37972	6.45039	6.04067	6.48398	6.87958	8.20755	6.63227	7.36632	8.399	6.72914	7.95553	8.71857	5.91265	5.75409	6.43012
ANO8	0.0739782	1.29866	2.85798	2.61353	2.85798	1.03562	2.14405	1.59932	1.99639	2.09424	2.90304	2.37295	1.35614	2.72465	1.03562	3.10936	3.44361	2.18269	3.13586	0.9855	2.63459	3.47379	3.29572	1.1177	1.53605
TUBE1	-0.102966	4.36177	2.59694	5.24222	4.47314	4.47638	3.71149	5.28244	5.17951	3.41414	2.87184	4.83137	4.95047	5.11686	4.06523	3.9279	3.98732	4.05572	5.93286	3.43296	5.38509	4.73769	4.59036	4.42895	1.80735
ACTR6	-0.0511296	4.17313	4.1235	4.58796	4.40803	4.92125	4.52669	2.91839	4.24869	3.96347	3.86888	4.67073	5.15866	4.49057	3.97177	3.17473	4.53667	4.4019	4.83744	4.07125	4.21335	4.44493	4.43429	4.33199	3.7866
TIPIN	0.0234374	4.36457	4.08576	3.92029	3.87283	4.60881	3.42223	3.75916	4.91169	4.21412	3.46074	3.92884	5.74658	4.47897	3.40599	4.02148	5.0072	4.1819	4.52732	4.43229	4.94767	4.25248	3.76341	4.43696	3.51223
SRI	0.301037	6.35332	5.26604	5.37955	6.47346	6.30561	6.66959	3.94673	6.92279	6.28854	7.41574	6.91385	6.99503	7.2076	5.36142	5.46369	6.3651	6.82413	7.97717	6.86406	6.92505	7.5299	6.93393	7.01514	5.68902
EIF4G3	-0.233116	6.15826	4.83794	5.15623	5.82909	4.81096	1.9486	4.1152	4.84499	4.93263	4.9644	4.45418	5.57046	4.58195	5.09803	5.16952	4.79077	5.01167	5.19338	4.17073	5.05615	5.12639	4.52105	4.53605	3.94111
NUP37	-0.163997	5.87553	5.23074	5.853	5.64703	6.3361	6.17971	4.29131	5.85474	5.28355	5.4522	6.27705	6.57228	5.18031	5.04221	4.15462	5.43162	6.0054	6.05767	5.68229	5.91886	5.85848	5.57864	6.52089	4.28983
GTSE1	-0.508535	5.4663	4.9644	4.61353	5.49793	5.18943	5.38647	4.17153	4.33842	4.81967	4.75649	3.96532	5.08364	4.8802	4.0781	4.95466	5.337	5.04177	4.95699	3.97085	3.82985	4.52544	5.39472	3.98003	3.25701
TTC38	0.0156134	4.72465	4.67976	4.11103	4.79961	4.45681	4.19928	3.34483	4.48864	4.02414	4.02591	4.28318	3.73552	5.78764	5.15137	4.91648	5.18388	4.85599	5.26566	4.36317	3.64386	3.90785	6.14832	3.98003	3.58616
ACAT1	-0.288417	6.76261	6.72955	6.52732	6.98709	6.52262	7.59485	5.56285	6.56575	6.78437	6.23266	5.37712	7.11572	6.94638	5.96648	6.61279	7.21296	6.79623	6.77083	6.17373	7.3906	6.7237	6.83074	5.60526	5.08194
GRAMD4	-0.204712	5.8505	6.10706	4.50589	5.82883	4.87086	4.01703	2.73118	3.94017	4.62994	4.854	3.73444	3.3978	5.34837	6.10727	5.15704	4.09761	6.38991	5.30415	4.05572	5.24982	3.43563	5.29499	3.53107	4.5008
ZNF638	-0.189582	6.69975	6.09592	6.0398	5.87995	6.2651	5.97407	6.61706	6.20242	6.57969	5.78738	6.05658	6.81839	6.28281	5.38163	6.16471	5.95466	6.51743	6.22901	5.64789	6.1375	6.03056	6.29462	6.06652	6.26491
SLC25A40	-0.196597	4.66164	3.50589	4.38612	6.11458	4.44493	4.70984	4.44493	3.76447	4.94767	6.11103	5.25701	4.64789	3.96255	4.28614	5.75942	3.36317	4.84649	6.2075	3.95513	4.64212	4.0054	4.58916	2.53356	2.90881
TIMM21	-0.338596	5.48896	5.38957	5.1823	4.93452	5.29315	5.45286	4.44559	5.04614	4.95559	5.04483	3.48156	5.58286	5.2384	3.73877	5.69711	5.49281	5.90328	4.47249	3.99458	5.59753	3.91361	4.92884	5.61794	3.58376
ZNF37A	0.173532	1.36737	2.67582	2.68032	3.32048	2.15056	4.08576	1.97085	3.39232	4.63633	2.84398	2.93923	4.32409	2.70487	1.92979	2.5008	4.1375	3.26604	3.58256	2.17632	3.5741	3.04789	2.96717	2.848	2.01792
MARK3	0.0139021	5.64068	5.22419	5.20203	5.27202	5.50621	5.23764	5.37608	5.16229	5.3512	4.85499	5.02503	5.55275	5.53201	4.96993	5.48382	5.98459	6.20203	6.16531	4.5404	5.59574	5.69544	5.83971	5.74819	4.55704
SLC25A3	-0.451058	9.34179	9.40829	9.49362	10.2359	10.1219	9.33275	8.92668	9.31809	9.81226	9.06953	9.00048	9.41975	9.60629	9.18217	8.14659	9.61752	9.16822	9.11082	8.8427	8.95672	9.07746	8.74312	9.16284	8.96705
FNDC3B	-0.26284	4.64904	3.65306	4.30597	5.01926	4.4822	4.75969	2.7137	2.14078	5.37782	4.00988	3.29866	2.854	3.47508	3.38543	5.39609	3.43829	5.38059	4.19377	1.67356	3.81967	4.5552	4.2426	1.70929	3.16189
FOSL2	-0.217307	4.72574	4.59216	4.60348	3.8748	4.0054	3.38681	2.58736	1.93734	5.30451	6.22265	3.12598	1.87578	3.10434	5.73227	5.80967	4.43363	2.97085	5.28207	2.52857	3.29866	4.40327	2.9542	0.632268	3.50208
FRYL	-0.0630733	4.40395	3.69488	3.74631	4.3505	3.99729	4.55397	3.27202	4.11853	5.11103	3.87873	3.7301	4.97269	4.35332	3.06695	4.35614	4.35473	4.17712	4.43029	3.58616	3.61471	4.5741	4.88166	3.0635	3.79286
TMEM131	-0.00473482	3.91073	3.30451	3.44095	4.50843	4.00809	4.39712	2.59216	3.76235	4.17233	3.69933	3.63575	4.37782	4.11437	3.59694	3.72137	3.9991	4.07382	4.62234	3.06005	4.02857	5.00045	4.34908	2.42223	3.2854
FSCN1	0.0346761	6.38353	2.51602	5.29315	2.79494	8.54527	6.87024	4.00899	4.92742	6.54473	1.17632	5.11645	5.0781	3.06178	2.22033	4.27873	7.70099	5.76155	4.95606	6.09064	0.956057	6.89093	7.61787	5.38853	5.68173
ACTB	-0.25028	12.243	11.6532	11.4479	11.182	11.9719	11.2987	12.1056	10.8265	10.5801	12.1763	10.7982	11.705	11.6095	11.7843	11.7126	11.2354	12.2114	11.2283	11.747	11.5866	11.5642	11.9892	11.4913	10.6818
PLD1	0.109458	2.87971	1.81147	2.45681	3.36317	2.59216	3.16189	1.79077	2.0072	4.0268	2.82375	3.853	1.79494	4.15381	1.54102	3.95977	1.74846	0.411426	3.61235	1.40599	3.6565	3.26153	3.37851	3.14241	3.12763
WDR62	-0.0487553	4.80993	5.15502	4.7137	3.851	4.54102	4.80839	3.57168	4.4957	4.337	3.93829	3.14568	4.39643	4.21335	2.98185	4.43563	6.69223	5.2555	5.26303	3.43162	4.63285	4.29278	5.08576	6.0881	3.57046
DLG1	-0.0571836	4.61235	3.38543	3.80012	4.77821	3.9607	5.25248	3.21723	4.78921	4.37851	4.49633	4.06609	5.14893	4.50653	3.01792	4.31107	5.69572	4.75489	4.87922	3.27798	3.74739	5.28947	4.82069	3.32912	3.17153
RAB7A	0.0524676	7.66619	7.39232	7.31859	7.26153	8.00096	7.70577	5.95652	8.10601	7.35447	8.1572	7.36886	8.28156	7.62826	7.59141	7.79487	7.15775	8.90035	8.16546	7.01748	7.80755	7.56803	7.87952	7.00787	7.08523
BCAP29	-0.0271294	4.53543	3.0321	4.0197	4.83542	4.40463	4.52669	3.9607	3.8953	3.64501	2.96901	3.53978	4.76447	4.50335	3.9991	4.35614	4.18031	4.31325	5.4266	3.99005	3.35332	6.2485	3.92884	3.26153	3.2765
SEC31B	-0.109973	3.39369	2.50589	3.9542	4.52669	3.62176	4.32841	2.99277	4.09761	5.64155	3.9486	4.86888	3.21878	4.21956	2.72901	3	4.26903	5.21101	5.19928	1.41684	4.63343	2.14078	3.38957	2.55827	2.51602
SART3	-0.202926	5.478	4.35755	5.03078	4.81967	6.12433	5.55428	3.44626	6.00248	5.14405	4.79129	4.4019	6.54442	5.61412	4.47314	4.0036	5.41684	5.09381	5.62498	4.76818	5.04002	4.69488	6.13586	4.27947	3.41143
ARHGAP15	0.0558478	5.97636	4.45812	5.63894	6.3443	5.51602	6.04439	5.95093	6.0072	5.49057	5.88142	6.0387	5.92671	6.06695	5.18309	5.91001	6.98812	7.09371	6.32805	6.64472	6.1102	0.0143553	6.17453	4.87578	6.85137
EXOSC7	0.0330279	6.17552	6.31288	6.49201	5.779	7.4002	6.55428	4.89045	6.56575	5.90231	6.33842	5.93475	6.44029	6.33253	7.25267	6.05463	5.73173	8.03227	6.41886	6.17832	7.2695	6.6241	6.633	6.66633	5.22997
KIFAP3	0.372375	2.81352	2.37016	1.67807	2.82375	2.64155	2.72028	1.4489	4.9528	2.32193	2.33056	2.77189	5.8189	4.49506	2.57531	2.18269	4.21023	2.81558	3.18269	6.61809	2.9782	4.33271	4.57046	4.03562	3.02148
MKRN2	0.0484505	4.69265	3.9782	4.74308	4.81916	4.61117	5.20438	4.77136	5.45121	4.99413	4.53854	4.59455	5.6522	4.93829	4.7447	4.91504	4.56499	4.90929	5.47184	5.07253	5.55949	4.75435	5.27836	4.48543	3.68032
MCM6	-0.279304	6.50319	6.31651	6.55919	6.1981	7.40165	6.16832	4.89869	6.52199	6.09001	6.01992	5.84021	7.11738	6.34501	5.83264	6.61794	6.42945	6.21004	7.03881	5.74953	7.28762	5.29278	6.28707	5.478	5.01703
REXO2	0.180845	5.19259	4.52419	5.6476	4.68145	6.19633	6.74483	4.42962	6.54288	5.77479	5.07596	4.85599	6.824	6.25437	5.01703	5.28318	6.97579	6.29333	6.56209	5.49729	6.19357	6.88228	7.74544	6.50001	3.58015
RBM7	0.0997604	4.40803	3.74739	4.0635	4.37782	4.75114	5.14282	2.01436	4.36387	4.4522	3.86691	3.82171	5.26941	4.81096	3.34625	4.33485	5.27389	4.29425	4.69488	4.83036	4.16993	4.45746	5.04483	3.83289	3.90689
BAZ2A	-0.152817	5.27836	4.16912	4.06867	4.76977	5.20398	5.26153	2.9279	5.63633	5.2075	4.66278	4.24184	5.85798	4.95466	5.16511	5.01837	5.19613	4.26003	5.3565	4.1375	4.70044	4.29719	5.71836	3.28688	3.31615
PTPN23	-0.0822223	4.62936	3.59932	3.58135	4.38474	3.96809	4.77189	2.76977	4.77873	4.08746	4.1127	3.0036	4.58316	4.45286	4.04614	4.19219	3.97911	4.77083	4.48478	3.60288	4.41278	4.72137	4.98185	3.45022	2.91839
MLH1	-0.168097	5.62994	5.29609	5.75916	5.94462	4.84046	4.97361	4.90833	5.56346	5.38543	5.51916	5.51475	5.67525	6.03012	5.11187	5.63749	4.78503	6.25852	6.14486	5.54411	5.51885	4.78607	5.3194	5.05658	4.62644
UNG	-0.228944	5.93286	5.55152	5.36177	5.40429	6.98584	6.07489	4.12019	5.85524	5.95907	5.41752	5.20672	6.41684	5.4165	5.30961	5.05181	5.96509	5.9364	5.89942	5.71122	5.3565	3.93546	5.54164	5.64674	4.94579
KLHL20	0.0566995	4.08491	2.60644	2.91073	3.74631	3.01078	3.6311	1.65076	3.80323	3.27798	2.76553	3.5097	4.0054	3.80219	3.64616	3.30451	2.79701	2.98185	4.07468	4.44294	3.82985	3.63807	4.4822	2.73118	2.49313
SPAG5	-0.460607	6.63778	6.20496	5.87897	6.24907	6.56758	5.732	6.01926	5.87529	5.8622	5.81275	5.09128	6.5697	5.70598	5.64126	6.04571	6.04636	6.94498	5.87848	5.35896	5.88972	6.09424	6.14262	5.83517	4.77136
ANKRD13A	0.0768272	4.1819	3.83086	4.82018	5.55827	5.23726	4.25626	3.79701	5.0063	5.09761	5.2292	4.3512	4.76607	5.07168	4.06953	4.0798	4.85499	4.65878	5.98391	3.91552	4.81967	4.337	5.43696	3.55582	4.66562
TPD52	-0.285656	4.92932	3.71149	6.13894	1.04264	5.1819	0.250962	3.74201	5.32697	0.516015	5.2891	3.44095	5.98231	0.454176	1.33914	1.18903	6.34003	4.22033	5.50557	0	3.0036	4.40939	5.23534	1.03562	0.0143553
TRAF4	0.181283	3.80426	3.91839	3.9607	3.24945	4.65592	2.26903	2.51602	5.71067	3.94017	3.98277	3.41414	5.69961	5.69181	3.94392	3.29278	5.05832	4.07468	3.89433	4.94251	3.70598	4.26228	4.765	4.53481	3.46597
PAG1	-0.212608	3.39232	2.17951	3.52105	4.06695	0.124328	2.40599	2.32769	3.06695	2.57773	2.38405	3.64962	3.59216	0.176323	3.58976	3.55827	2.27202	2.14731	3.93357	2.75916	2.80735	0.0143553	3.82985	0.0703893	1.13093
GPATCH1	-0.00221533	3.27798	3.26454	3.73335	3.10098	3.04264	3.32481	2.68706	3.27053	3.11103	3.12598	2.66221	3.27798	3.18745	2.94673	3.13586	3.73769	3.22342	4.0054	2.41143	3.39917	2.58736	4.09424	4.23802	2.74201
ICAM3	0.475796	4.01792	3.84097	5.96786	4.4522	6.82197	5.68342	5.14608	4.91886	4.68313	8.17787	7.50064	4.3147	5.69766	3.33628	6.7658	6.76527	6.92813	8.20516	6.38405	5.63691	3.72465	6.32283	6.23668	8.63212
NT5C2	0.242629	4.55275	5.1035	5.47897	5.43463	6.15299	5.7939	4.87529	5.85325	6.73998	5.71589	6.04549	5.68398	5.96578	5.45713	4.87332	5.65764	6.26585	6.46907	5.66874	6.33235	4.10518	5.4002	4.65134	6.13771
MBNL3	0.017382	2.69599	1.45943	1.07724	2.92979	2.91073	2.74201	0.871844	2.95233	3.05485	2.33914	1.54597	3.5509	3.5435	0.956057	2.12433	2.0036	1.81147	3.87873	3.31615	2.34767	1.21412	2.70266	1.5008	1.97085
XAB2	-0.010729	5.23036	5.28762	5.25437	4.93168	5.55766	5.06738	3.87283	5.4941	4.60348	4.72846	5.12433	5.11645	5.13422	5.07425	4.73064	4.76977	5.40327	5.6091	5.15178	5.46336	5.64212	6.61839	4.96763	4.30816
ARHGEF1	-0.2359	7.19879	7.13822	7.12784	6.93121	5.43763	5.90231	6.38284	7.89033	6.10413	6.77056	6.1102	6.58767	5.99481	6.41278	6.3572	6.35913	7.61198	7.6953	5.69404	6.99526	5.77952	6.7974	5.91624	6.34536
STXBP2	-0.331257	7.81602	8.0018	7.12288	7.64017	7.13031	6.192	6.13996	7.73023	5.44559	7.28873	6.70556	7.19377	7.27408	7.075	7.58188	6.2034	6.72342	7.17582	6.65435	6.95093	1.47508	8.42551	3.13258	6.36387
MAP2K7	-0.139317	4.46793	4.98003	4.48736	4.45352	4.90737	4.58976	2.73985	4.92077	4.63633	4.24413	4.02857	4.41886	4.53916	5.09508	4.2149	4.3505	4.53169	4.83845	3.90593	4.43496	4.61648	6.04723	3.87676	3.36597
DGKD	-0.258277	5.44923	4.22419	4.67807	5.65878	5.50938	4.16993	3.51728	5.45088	4.37226	5.4522	4.31397	5.22766	4.67469	5.53169	5.24793	3.94298	6.39609	5.50716	2.62527	5.20516	4.16108	4.28688	2.852	3.64501
TOP2B	0.178306	6.85674	6.84373	7.09054	7.35368	6.76275	6.86505	5.68874	7.41988	6.88362	7.06156	6.18507	7.886	7.88673	5.78529	7.79533	7.14578	8.20129	7.03573	7.45055	7.83162	5.71177	7.5812	6.87295	7.24698
TM9SF3	0.296811	4.42492	4.56803	4.99865	5.36632	5.53667	5.15056	3.56438	4.92647	6.13134	4.96486	5.64587	5.79364	5.43029	3.91743	4.32697	6.20555	5.10601	5.71287	5.33485	5.15583	5.23573	5.55336	5.09466	5.31325
NFKB2	0.36818	2.79701	2.96347	2.59932	3.93829	3.50462	3.02326	3.19535	4.10098	3.31325	2.7845	3.32481	3.82171	4.09085	4.37434	2.61353	4.25626	3.44758	4.07724	4.55704	4.21335	4.84147	4.14568	4.39438	2.33342
UBE2T	-0.241833	6.57365	6.19417	6.4733	6.58631	6.50367	6.72137	5.88947	6.23285	5.92576	5.12226	6.03892	7.18656	6.15826	6.34784	5.82451	5.55059	6.26922	6.60274	6.77505	6.52042	6.62249	6.25323	6.83036	5.02945
PPP1R12B	-0.277866	2.75061	1.62293	1.852	3.59574	2.18903	2.35614	1.76129	1.99277	2.0321	2.1375	1.24489	2.08066	1.75275	2.77821	2.86592	2.0036	2.12102	3.27202	1.25096	2.41684	1.81558	2.46205	0.765535	1.01436
DNAJC10	0.0438874	4.32553	2.03562	3.22033	4.02857	4.01703	3.57773	2.17951	4.38474	4.44361	3.17473	3.90785	4.70764	3.94392	2.32769	3.56071	4.73877	4.6427	5.85947	3.51096	4.55029	5.04527	3.70377	2.49825	2.08066
GTF3C1	0.25798	5.43263	4.79025	4.44427	4.54844	5.14078	4.19928	4.23496	4.70487	3.77716	5.15137	4.28688	4.78764	5.01346	6.40207	4.71534	5.21101	5.52701	4.71205	4.92695	5.33664	5.45088	5.56925	5.15745	4.96809
IL4R	0.237657	3.96809	3.27352	3.20945	3.81558	3.69153	4.39094	2.75275	4.28021	2.34483	4.24108	3.58736	5.07767	4.05311	4.0054	3.5472	4.04352	4.84147	4.96023	3.46597	4.82273	3.88753	5.38301	2.70708	3.78241
USP33	0.125008	4.91073	4.31397	4.42895	5.15826	4.64731	5.00045	3.94205	6.0635	5.00944	4.61294	4.40599	6.7707	4.97131	3.95047	4.80787	5.84273	5.31361	5.22535	4.55766	5.16712	5.17073	5.71617	4.54659	4.38405
SNRPA	-0.135707	6.87061	7.43104	6.96174	7.21558	7.10737	7.29765	7.2971	6.90737	6.58391	6.87541	6.5944	7.34643	7.63996	6.86518	7.01246	7.16742	7.39086	7.28485	7.00113	7.28105	6.99141	7.05159	6.98322	6.63038
EXOSC5	-0.263782	5.66846	6.75716	6.87283	5.68201	5.2149	5.76368	6.29646	6.60763	5.57833	5.58436	5.21218	5.97797	5.77689	6.30049	5.82248	5.54597	6.49249	6.54303	6.00338	6.68173	5.64847	5.69125	5.78738	4.88899
DYNC1I2	0.105877	5.47703	5.04221	5.23343	5.76951	5.55275	5.9397	4.72465	5.49185	5.22766	5.45549	5.41244	6.03276	5.904	5.04701	5.30561	6.01614	4.51159	6.04636	5.26679	7.41709	7.19446	6.19535	5.28873	4.51791
APBB1IP	-0.125663	4.36317	4.73498	4.81711	5.35156	3.41954	5.38543	3.15056	5.75862	6.6532	5.31506	2.33342	5.99684	0.0976108	5.78869	5.19535	5.25058	3.94953	5.48253	4.72629	3.7666	0.0426443	5.80941	0.411426	5.24298
LRCH4	-0.205886	5.92291	6.34536	5.78581	6.10873	6.11374	5.90785	5.62293	5.31542	5.43029	6.62278	4.83036	4.26153	5.9905	5.96578	6.19022	5.17353	6.72397	6.98755	5.51223	6.15805	4.14568	5.08874	4.94158	5.7666
FAM76B	-0.232568	4.68257	4.08576	4.33342	5.30012	5.25248	5.48059	3.32193	5.41244	4.6311	4.41752	4.41752	5.53263	4.99322	3.83895	4.6792	4.9644	4.45418	5.64328	4.32912	3.73769	3.3799	5.00045	3.44493	3.61589
SIRT6	-0.264204	4.66959	5.81839	5.37573	4.1811	3.91169	3.30889	4.29719	4.39369	3.91073	4.64904	4.5404	3.58856	4.37295	4.58256	4.60644	4.03914	5.41549	5.60733	3.58376	5.06695	4.84348	4.03914	3.67469	3.70598
POLD3	-0.4189	5.34908	4.48285	4.45154	5.04963	4.28244	4.43962	4.48607	4.40259	3.98277	4.7447	4.35262	4.87283	3.78136	3.7366	5.01033	4.26303	4.93121	5.27016	4.12516	4.72137	3.91934	4.94953	2.7845	3.44361
CAPZB	0.144185	8.12954	7.53986	6.98459	7.16842	7.30989	7.93198	6.99164	8.00703	7.21684	8.02912	6.70529	8.4124	7.21315	7.30879	7.47889	7.94527	8.07114	8.0343	7.73295	7.6271	7.59074	7.69342	7.3972	7.99712
JADE1	0.163782	4.19771	3.17153	3.78973	4.25776	4.29719	3.45549	3.16672	3.49057	4.38198	3.23266	3.51728	4.21878	4.87184	3.23113	4.34199	5.12019	4.79286	4.93168	4.28244	3.79597	3.91743	4.90111	3.61353	3.26604
SLC25A43	-0.165128	3.5656	2.75489	2.86987	3.5656	3.60881	3.74631	2.848	3.68594	3.46074	3.0197	2.848	3.79077	1.08406	3.0197	3.12928	3.54226	3.09761	4.02857	2.78241	4.14486	4.59694	3.22033	3.13586	1.56071
UBE2A	-0.16025	5.84674	5.75435	5.44062	5.78686	6.19574	5.99458	4.51412	5.05137	5.78293	5.57168	6.04636	5.4614	5.25512	5.06738	5.86542	5.04789	5.8953	6.15097	5.33163	6.40242	6.14037	5.80607	5.12681	4.91121
FGFR1	-0.293548	4.84348	2.64616	1.91456	3.46074	3.32481	3.96717	1.79077	0.286881	4.62936	4.76022	4.36667	0.356144	0.575312	1.45418	2.28983	2.23879	1.26303	4.59813	1.61353	2.63459	5.60555	1.03562	2.38128	1.14405
CST7	0.194782	2.27202	4.73118	8.04658	3.75061	6.87652	2.91265	6.52513	3.19849	0.948601	5.02148	7.94263	1.64155	3.09761	7.04385	7.7502	2.16672	8.09228	9.1694	3.30012	10.6832	0.0703893	6.926	1.91839	7.9241
PIAS2	0.0863284	3.26303	1.92979	2.32193	3.10266	3.01257	3.31179	1.4957	3.52732	3.22805	2.79701	1.75275	4.19692	3.29866	2.19219	3.39232	4.05658	3.50589	3.6427	2.66903	2.46728	2.76129	3.30305	3.01436	2.07724
ARAF	-0.044967	5.38922	4.8885	5.12722	5.1102	5.24907	5.46074	5.26679	4.65992	5.14893	5.39951	4.4019	4.44758	5.26866	5.45878	5.36212	4.62936	5.54133	5.45022	5.56742	5.19771	4.30159	5.7447	5.81634	4.55704
MCCC1	-0.169115	4.926	4.56621	4.77294	6.09466	4.70819	6.01814	5.20085	5.7241	5.06824	5.6311	3.80116	5.72656	5.52325	4.64097	4.46401	5.98846	5.74792	5.10308	3.42492	5.35685	3.48156	5.09085	4.18903	4.72083
ACER3	-0.0204996	2.53854	2.1375	2.19849	3.29719	2.85997	3.16832	2.26303	3.64847	2.9782	3.23113	2.85997	4.02503	2.22959	1.38405	3.41278	3.69377	2.52607	3.81762	2.89142	2.84398	2.66676	2.91265	1.76977	1.82375
UBE2K	-0.160788	6.04767	5.31433	4.81096	5.0268	6.46695	5.82985	5.51444	5.93003	5.43229	5.51065	4.62819	6.37295	5.41988	4.83441	5.3906	6.13114	5.58496	6.04418	4.99005	5.21684	5.11103	5.01926	5.80168	5.28762
PIK3C3	0.0447067	4.31976	4.18903	4.67864	4.3799	4.4822	4.83289	3.8268	5.0993	4.71864	4.53356	3.06695	5.47151	5.08023	4.24717	5.22997	4.16027	4.45943	4.29352	4.0036	4.69265	2.9486	4.57228	4.94907	4.765
N4BP2	-0.188824	2.33628	2.17951	2.52607	3.27947	2.53605	1.89142	1.37851	1.75275	2.86592	1.8953	2.65076	1.9782	3.11603	1.5656	2.36457	2.26303	1.27501	3.20477	2.26903	1.69599	1.96717	1.3505	2.02857	2.17632
TULP3	0.0331697	2.37851	2.46989	2.30451	2.31325	3.07039	3.27053	1.77821	2.67582	2.82171	1.70929	1.83188	3.48543	2.80323	2.91648	2.69377	2.97453	2.88557	3.13422	2.63227	2.88166	4.25399	3.45154	2.45154	0.879706
SYNJ2	0.325935	3.5509	1.82782	1.59932	3.52732	2.4957	1.9486	1.31615	3.52356	0.815575	2.05658	2.65306	4.54597	1.83592	2.12433	2.60644	4.40531	6.88252	3.66221	3.03034	3.41143	5.49729	3.59694	2.15381	3.75061
PPP2R5C	0.302701	5.75328	5.42761	5.44427	6.04045	5.78084	5.66959	5.52826	5.25776	5.62527	5.48188	5.83086	5.80271	5.97016	5.63778	5.83643	6.33271	6.08044	6.07724	5.28688	5.82757	5.9542	6.27501	6.98607	5.37086
GNB1	0.0905606	7.58984	7.0766	6.67497	6.10873	7.04308	7.70203	5.61971	8.08958	7.19012	6.66974	6.488	8.12402	7.45022	7.36623	6.89676	7.52348	7.43954	7.8816	7.54272	7.5821	8.06296	7.65112	6.15745	6.61309
HOXA9	-0.175875	6.14547	5.61706	6.92255	6.23707	0.757023	0	5.08406	0.443607	1.52105	7.66213	5.11936	0.799087	0.0703893	6.37521	6.40871	0.941106	0.31034	8.12547	0.137504	7.36973	5.39232	0.201634	2.51096	4.29646
MLLT10	0.116939	4.46989	4.60703	5.26604	4.79025	4.4822	4.56864	4.17951	5.79546	6.19987	5.0036	3.66903	5.972	5.6241	4.22959	4.02945	5.20945	5.03298	6.43679	4.75061	5.37921	4.04089	5.57046	4.27426	4.98368
ZCWPW1	-0.228624	3.04789	2.58496	1.69599	2.06695	2.30159	3.40735	2.73552	2.76553	1.33914	4.23879	1.05658	2.11103	1.54102	2.98914	3.37434	1.14405	2.68257	2.90304	1.98185	2.41954	2.07724	1.60881	1.46467	2.10434
ITM2A	0.368797	2.7845	0.31034	0.0426443	0.0703893	1.59932	7.37321	0	5.75328	5.48253	0.111031	4.08151	6.26097	8.01363	0.0976108	0.0426443	6.13771	5.85	2.84599	8.3262	0.0143553	0.111031	7.37626	5.47508	6.68342
NRDC	-0.130831	7.44501	6.56026	5.87553	6.48752	6.16852	6.41447	6.20535	6.76035	6.63517	6.42844	6.17911	7.20936	6.21762	5.73796	6.63372	7.49185	5.98891	6.4949	5.82094	6.7362	7.05788	6.98379	6.18587	6.33807
VDAC3	-0.460539	7.84449	7.98647	8.14292	8.23434	7.12257	7.49817	7.0797	6.96832	7.13791	7.28725	6.96832	7.87922	6.91958	7.12495	7.72431	7.33949	7.28309	7.08428	7.22709	7.34003	7.33154	7.03705	7.8334	7.26754
PCM1	-0.248764	6.99367	6.59186	7.25512	6.85362	6.70653	5.84348	7.48027	6.35632	6.19042	5.87946	6.25512	7.10685	6.54195	6.2724	7.18686	5.38232	7.09128	6.22323	5.88582	6.67299	6.0706	6.59649	7.2294	6.38422
CBFA2T2	-0.0429855	2.91839	2.14405	1.91456	2.64616	2.64616	2.65076	1.44361	2.9542	2.63459	2.50843	1.90304	3.32048	2.58496	2.56316	2.56316	3.20477	2.43829	2.97269	1.93357	3.53605	2.57773	3.01614	1.89142	1.50589
ITCH	0.113123	3.90785	2.68482	3.26153	4.04352	3.81147	4.28983	2.05311	4.765	4.23726	3.43696	3.08236	5.19259	3.91934	3.45943	3.90785	4.45746	2.86987	4.30378	3.8846	3.94767	4.6837	4.43563	3.65076	2.83592
SDF4	-0.0923704	7.4138	6.60851	6.57228	5.39232	6.76102	6.58571	4.46205	6.78202	6.36142	6.95652	5.38336	6.2555	6.31578	6.38853	6.98539	6.62585	6.83504	6.91934	6.33896	7.2294	7.29214	6.76832	5.70127	5.8387
TOLLIP	-0.103303	4.89045	4.74578	4.46336	4.44493	4.4121	3.58256	2.92979	3.81967	3.87184	5.34021	3.5656	2.88753	4.34483	4.83036	4.82018	4.16832	5.04614	4.76129	3.04789	4.6241	4.24108	4.58616	3.91648	4.16269
UBE2D4	-0.111817	3.4957	2.41684	2.43563	1.97453	2.96347	2.51602	2.64386	3.10769	2.87184	2.26903	2.07382	3.19849	2.58015	1.88753	2.55582	3.23113	2.96901	3.99639	2.69377	3.15056	3.56438	2.4957	2.94486	1.51602
THOC1	-0.278828	5.25475	4.97911	5.22882	5.75034	5.37747	6.06889	5.1635	5.55275	5.59604	5.12722	3.71589	5.70764	5.40463	4.03034	6.19928	5.78555	5.55919	5.05137	4.01078	5.38198	3.4489	5.91121	5.01614	3.92979
FKBP7	0.351495	2.72683	2.20163	2.63227	2.64155	3.15704	4.03034	2.25096	3.37712	3.73118	2.61824	2.81762	4.04089	3.34767	2.20477	2.90111	2.58736	2.73335	3.26604	3.64731	4.50398	5.1152	3.01257	3.47249	3.36457
XRCC5	-0.107274	7.48398	6.93522	7.20301	7.33181	7.40276	6.88679	6.283	7.91265	6.54411	7.01268	7.21927	8.62593	7.37452	6.51033	7.0649	7.28235	6.9806	7.49033	7.72083	6.79662	7.7709	7.36484	6.89045	6.37851
LXN	0.476651	0.0285692	2.9855	0.545968	4.58436	0.137504	3.86691	1.42223	3.76129	4.42021	0.0703893	1.84398	4.85649	2.65306	2.37573	2.69599	6.04089	0.765535	3.01078	5.69516	0.0703893	6.39815	6.57501	6.4801	4.96947
MKNK1	-0.352705	5.60407	5.58105	5.43062	5.11686	4.47314	4.53356	4.42828	5.31506	4.22728	5.24336	3.904	5.57592	4.92742	4.37295	5.50398	5.58886	5.61971	5.56194	3.91169	4.91265	3.96625	5.14282	3.69042	4.32697
REXO1	-0.301774	4.70653	5.31034	5.00854	4.11853	3.93829	3.78136	3.98277	4.75275	4.46923	4.23266	4.33271	4.25475	5.15178	4.3875	4.04089	4.2854	4.85997	4.78921	4.55643	4.28983	4.69098	3.99005	4.20711	3.97085
SAR1A	0.424633	4.02237	4.60348	4.67186	4.52795	5.10601	4.70487	4.31252	4.38957	5.68032	4.56194	4.78555	4.99503	4.85599	4.17951	5.40395	5.70238	5.58976	5.7412	4.65191	4.87332	5.18587	4.82883	4.95187	4.71315
CDC14A	-0.0163389	3.15543	2.10434	2.65764	3.32481	2.46728	2.72683	2.05658	2.46467	3.27798	2.06695	1.95606	2.74201	2.72465	1.91073	3.36737	3.25701	2.65535	3.29572	2.06695	1.95606	1.79909	3.34199	3.21723	2.58976
SENP1	0.187192	2.43563	2.37573	2.66676	3.49185	3.69711	3.44361	2.07039	3.84097	3.13093	2.70487	3.14568	4.66562	3.73118	2.38957	3.31034	4.70155	3.31179	4.18824	3.45681	2.9486	2.89142	3.92505	2.74416	2.10098
CIC	-0.155256	4.37573	5.02104	4.49121	4.70266	3.86394	4.97223	3.45549	4.57773	4.32697	4.32193	3.02857	4.15866	4.47832	4.77979	4.79649	4.9486	4.95652	4.62059	3.31325	4.13832	4.02237	5.81096	3.51096	3.64039
LIPE	0.119431	2	2.65076	2.47508	0.411426	0.250962	1.76977	1.49057	3.4019	2.22342	2.5435	0.422233	2.93546	3.43296	0.748461	2.19849	2.98368	4.09508	4.07724	1.63227	0.333424	0.286881	3.7301	0.594549	3.03562
FDFT1	-0.213332	8.20994	8.00518	9.06245	7.92541	7.97493	8.57308	6.03804	7.42156	7.80071	8.69024	5.97338	7.84204	7.04461	7.07575	9.18406	7.50414	8.85602	8.13124	7.61007	9.0964	7.17772	8.37717	7.14873	6.7922
PAFAH1B3	0.166638	5.13175	5.95675	5.57743	5.59276	4.70155	5.81788	5.34483	6.42878	5.66306	5.47735	4.81301	6.19712	6.43946	4.41075	5.19653	6.28633	5.46172	6.45006	6.17812	6.36317	5.18864	6.4353	6.19731	5.20672
KIF22	-0.297809	6.98846	6.82324	6.80116	6.30979	6.96682	6.01636	7.38076	5.86295	5.65306	6.60984	6.26847	6.24317	6.73593	6.40412	6.64616	6.4733	7.21325	6.94895	5.95	6.94895	6.62585	6.77136	6.71918	5.39197
PGM1	-0.122366	3.53605	3.53232	3.89627	5.12887	5.21062	5.77795	1.34483	5.33092	4.8339	5.83567	4.30378	5.7498	0.678072	5.66789	4.7666	0.201634	5.916	6.30159	0.0976108	6.2765	4.66676	3.78346	0.594549	2.73769
DDX1	0.00939637	6.08725	6.10245	6.45418	5.83946	6.85748	6.44559	5.49121	6.93887	6.55612	5.65335	5.88387	7.41726	6.77255	5.13996	5.88533	7.70681	6.08576	6.00764	6.67398	6.68538	6.10224	6.7286	6.75114	5.46041
DNM2	0.0856794	6.55597	6.6014	6.53434	5.853	6.2572	6.31759	5.3579	7.2879	6.0018	6.37643	6.24394	6.85699	6.52842	5.94017	6.12908	6.94169	6.73498	7.4143	5.98641	6.22786	6.07017	7.60251	7.89785	5.62322
EPB41L2	0.113196	5.95513	1.45943	0.799087	5.41853	4.54967	4.71699	3.66676	5.94087	5.71918	1.91839	0.604071	6.21704	0.321928	4.58376	4.22419	6.74564	5.90376	5.70791	5.57773	0.124328	5.52701	6.89506	4.01525	3.79181
STX7	-0.00696971	4.22497	2.9279	3.8679	5.10811	4.0798	3.55336	2.24793	4.44095	4.42291	3.7939	2.15381	4.69599	4.63169	3.43029	3.7666	4.5509	4.25852	4.59036	4.01436	4.26153	5.1102	5.0365	3.76553	2.21412
RABL2B	-0.390681	4.2817	3.97085	3.36177	4.31687	3.8268	2.98368	3.03034	3.38267	3.66676	4.05398	2.88166	2.76553	3.95699	3.46074	4.36737	3.17792	4.02059	4.30305	2.0321	3.98914	3.99095	3.06523	3.03386	2.12763
KEAP1	-0.00326539	6.32769	6.10706	5.81198	5.50589	7.15431	5.90905	5.0993	6.68285	5.14568	5.46041	5.57319	6.67186	6.01413	5.8334	5.6241	6.5941	5.849	6.38215	6.00338	5.68846	5.78477	6.91253	8.00096	5.06307
SLC35C2	-0.164484	5.45878	5.97888	5.5509	5.56621	5.48317	4.8268	4.30597	5.10266	5.35931	5.40497	5.3505	5.09043	4.852	4.749	5.70349	4.85	5.67299	6.36667	4.90929	5.98254	5.60199	4.86146	5.25361	4.94017
RIF1	-0.102302	4.16511	3.02503	3.44095	4.29646	4.37712	4.25172	2.1375	4.11103	4.1235	3.50589	3.3799	5.12639	4.38128	2.59932	3.86196	4.89966	3.60407	4.04963	3.34483	3.71149	3.38267	5.08619	2.9782	2.59216
RAB21	-0.172497	4.58736	3.65878	3.70155	3.90689	4.71205	5.03254	1.72683	4.43962	4.12516	3.89239	2.70708	5.1914	4.5404	3.83794	3.46858	3.99729	4.38957	5.00135	3.32193	3.1177	3.82883	4.56682	3.34483	2.99095
SMARCA2	-0.0337589	7.12474	5.05788	6.03122	6.84612	5.42324	5.88411	4.48736	7.2866	4.8166	4.4363	5.24982	7.24498	6.39129	4.31252	6.34891	4.77241	6.09866	7.0634	5.60615	5.6837	5.06996	7.2213	4.29057	6.99763
SESN1	0.0748239	3.8953	3.53107	3.73227	4.75114	3.10098	2.19849	3.57168	3.23573	2.99458	4.62819	3.07039	4.33557	4.69711	3.46989	5.55367	4.21956	3.8125	3.87774	3.60288	2.62059	2.34483	3.52732	3.2854	4.34483
SRCAP	-0.212827	4.5656	2.43563	3.26303	4.5435	3.67694	3.28836	1.07039	3.95884	3.58376	3.50716	1.70044	4.12681	4.20477	3.58616	3.83895	4.38267	3.55949	4.75862	3.01257	3.33628	3.24184	4.79494	1.18903	0.963474
PUM3	-0.292459	6.28633	5.49281	5.7366	5.29793	6.90761	5.97568	4.72574	7.73451	4.49378	4.10769	4.4363	8.41079	5.83365	4.44095	5.30852	5.44824	5.87897	5.44361	5.74551	5.30378	5.28688	6.51254	4.26828	3.9364
CNOT4	-0.0279373	3.46467	2.68257	2.75275	2.70929	3.47379	2.81967	2.6017	2.60881	3.25852	1.74846	1.88753	3.25096	3.41819	3.27947	3.22651	3.22805	2.88362	3.50208	2.63923	2.85997	3.67469	2.58976	3.23419	2.47768
PSEN1	-0.0547534	5.25965	4.30597	4.47962	4.62936	4.36177	4.09508	3.61824	4.21257	4.5404	4.7866	4.66676	4.39849	4.76022	4.61353	4.95	3.64847	4.53978	5.29756	4.43496	4.06264	4.14812	4.916	4.20242	4.61589
CPOX	0.0696136	4.0027	4.80064	4.31107	4.58556	4.37643	4.60051	3.37016	6.15299	4.62819	3.78973	4.39575	6.59066	5.25814	3.72792	4.14568	5.19377	5.48253	4.926	4.52419	4.90593	4.18903	6.12619	4.84197	3.14241
CLDND1	0.124371	5.28983	5.99299	5.26566	4.93168	5.10559	6.47671	4.65421	6.2854	5.40769	5.34127	6.19101	6.59753	5.77373	5.16912	5.5741	5.31325	6.66363	6.0813	5.37747	6.32463	6.23993	6.32391	4.83946	5.03738
MOK	0.100754	1.10434	1.22651	1.52105	4.76871	8.45627	1.99639	0.790772	3.46728	1.22651	4.09001	3.36877	4.18745	3.55213	0.887525	0.678072	1.82375	2.74846	1.02148	0.807355	2.08746	7.91001	1.79494	2.98185	4.35685
HSP90AA1	-0.251192	9.5785	9.21842	8.78996	8.24184	9.88263	10.4119	7.90719	8.14211	9.5095	8.79058	8.19328	9.60995	9.27768	7.53201	8.82461	10.3057	8.97441	8.71005	8.77337	7.98874	10.4214	8.99707	8.9697	7.55136
RBL1	-0.592934	4.02768	3.08576	3.36737	4.0321	3.47897	3.29866	2.28983	3.13093	3.41007	3.1635	2.92979	3.5008	3.50716	2.65764	3.05311	2.68032	3.11103	3.60999	2.31615	3.53481	2.64847	2.65535	1.74846	2.03914
DLGAP4	-0.050995	3.52982	3.61941	4.17712	4.69432	4.97407	4.10098	4.23189	4.94767	3.72901	3.74953	3.04963	5.0018	4.98413	4.94064	4.03826	4.41143	4.21645	4.70155	3.85997	4.50716	5.48896	4.26153	4.45812	1.95977
NDC80	-0.207723	5.30706	4.72683	4.98231	5.20203	4.96763	5.29609	5.32048	5.36142	4.78712	4.17951	4.29572	5.89118	5.0635	3.84699	5.45418	5.65793	5.22497	5.24336	4.26978	4.76022	4.57833	4.90929	5.43095	4.30086
AP4E1	-0.211977	2.63691	2.29866	2.63923	2.93923	2.65306	3.63575	1.926	2.86394	3.04614	2.15704	2.62059	3.23573	2.75916	1.78241	2.73552	2.8339	2.12102	3.25399	1.926	3.0268	1.95606	2.64616	1.78241	2.19219
RSBN1	0.0475784	3.16832	2.14731	2.58015	3.07724	3.07039	3.08406	1.70929	2.89918	2.90497	2.8953	2.52857	3.38819	3.24641	2.75061	2.75489	2.53854	2.93923	2.93357	2.39506	2.86394	2.37016	3.44758	2.53107	2.82171
OSTM1	-0.110276	4.20867	2.47768	3.75702	3.71149	2.59455	1.65992	3.37573	3.29572	2.4489	2.38957	3.66789	4.03914	3.17951	2.62527	3.43296	3.52982	2.49825	4.15299	2.95606	2.60644	3.73552	3.12433	3.22342	2.72028
PCNP	0.0914593	6.59515	5.98732	5.98573	6.69307	6.60125	6.76062	5.14364	7.48768	6.41802	6.21412	6.8212	8.12417	7.12763	6.0197	6.40429	6.71425	6.57046	6.91205	6.28077	7.00697	6.48688	6.65778	6.29957	5.98459
EXD2	0.0737062	2.9279	1.55582	1.92979	0.0565835	2.87774	2.60407	0.545968	2.79701	2.40871	2.81147	3.04614	3.31034	3.38267	1.52607	1.42761	2.81147	0.495695	2.96532	2.66903	2.51096	3.42895	3.95699	2.72028	0.83996
MEF2C	-0.135029	5.68117	4.21568	5.83895	6.81686	0.411426	5.17672	4.25852	6.00068	5.39197	5.96832	4.21645	6.81634	5.98823	4.50335	1.13093	6.52576	2.78241	5.69488	6.19456	1.79077	3.7761	5.17033	4.60881	4.16108
PTPRC	0.0377224	6.44708	3.7666	4.854	8.13627	4.97315	4.75756	4.43829	6.74967	3.63807	5.66931	6.16571	7.03606	5.96463	6.75702	6.31179	6.71315	4.87135	6.36772	7.25927	5.26529	0.0426443	7.1035	4.66619	5.64645
UBA5	-0.169911	5.0751	4.69377	4.9397	4.8089	5.19022	5.34234	3.63227	5.79675	4.99277	5.15218	4.08661	5.8392	5.43896	3.92505	4.77768	5.51223	5.46826	5.6008	4.14731	4.73823	4.7339	5.5598	4.37712	3.72792
STK17B	-0.00448896	3.41278	2.33056	3.87283	3.853	4.67243	1.8679	3.05658	2.03914	1.99277	2.64386	2.9486	3.42089	3.77189	4.0072	3.10098	2.23266	3.81865	4.56925	2.48543	3.60051	2.60644	3.04439	2.25399	3.42895
ZNF510	-0.225558	2.6893	1.69153	1.774	2.41414	2.05658	2.29866	1.74416	2.38957	2.49057	2.02503	1.85997	2.53605	1.22033	1.46467	1.9782	2.01436	1.81967	2.848	2.21101	1.70044	2.55582	2.02148	2.34199	1.37295
ZNF506	-0.101089	3.55582	3.93074	2.33628	0.9855	1.73985	0.9855	2.57773	0.411426	1.852	2.64386	3.23879	0.536053	2.24184	1.66903	2.35896	2.99095	3.65535	4.45681	2.93923	3.18269	0.333424	3.89336	3.44228	0.321928
JMJD4	-0.518402	5.21412	3.83895	3.61353	4.58976	3.85	2.60881	3.37156	4.5435	3.72137	4.04614	2.56071	4.48349	4.20711	4.08831	3.27053	4.22265	3.0321	3.94111	3.30159	3.66789	3.43296	3.56194	3.2765	2.09424
DUSP12	-0.0686443	5.4545	4.69209	4.72083	5.58767	5.35473	5.43129	3.63575	5.38716	5.07682	4.7301	5.33092	5.37643	5.23688	5.93216	4.97223	4.65191	5.0387	5.77952	5.41583	5.48896	4.19061	4.80323	4.56499	4.68818
AACS	0.0110445	4.0505	4.40327	3.29278	3.28688	3.36317	0.823749	2.62761	3.23113	2.62059	4.38128	1.83592	3.78136	3.99639	4.34837	3.81044	1.91839	4.47768	5.40735	2.98003	4.13258	3.11936	4.74093	3.07724	2.70266
DELE1	-0.231203	5.43062	5.21101	5.28392	6.20574	5.25701	5.41244	4.73227	5.81967	5.35579	5.63169	4.852	5.42626	6.02768	5.41819	5.37434	5.58736	6.05832	6.26303	4.85748	4.93452	4.99548	4.6865	4.26228	4.77768
HSPB11	-0.0785516	7.03914	6.53574	5.14934	6.14954	5.85972	6.63154	5.83971	6.26209	5.1807	5.45352	5.6642	7.79773	5.58015	4.89966	6.14527	6.69558	6.94122	6.14303	6.363	6.17453	6.15583	5.9644	5.6792	6.32948
PHLPP1	-0.440297	4.41007	3.84398	2.34199	2.67129	2.17632	2.98368	1.92979	1.73552	3.53605	3.01614	1.03562	2.30159	3.21101	2.62527	3.37016	1.81967	2.54102	3.11603	2.09085	2.40054	0.9855	2.08746	1.84398	2.71809
SMARCD3	0.169266	3.77505	2.19535	2.07039	2.96901	3.23573	1.41143	1.96717	1.55582	3.29131	3.41143	2.27202	0.918386	1.30451	4.13668	4.04701	1.74416	5.23573	5.81378	0.432959	5.45286	4.56194	1.54102	2.40599	3.70377
WDR70	0.360851	3.94673	4.07468	4.11603	4.51096	4.36737	3.6893	4.77716	4.21645	3.89239	4.96993	3.848	4.32193	4.29719	4.53169	4.23266	4.65478	4.7339	3.60526	4.71864	4.03386	4.17712	4.44692	4.49442	4.94017
FYB1	0.1647	3.89142	2.29866	1.93357	3.62059	2.04963	2.66221	3.51223	4.42425	3.12102	5.10727	4.34696	4.41549	1.5509	0.903038	4.55888	2.95606	4.8535	5.54195	4.53667	3.84599	0	3.65535	3.01436	4.29866
STRADB	0.395089	4.12598	3.10601	3.19377	3.62994	4.40939	3.67243	3.28688	3.8953	4.24793	4.65076	3.69042	4.15866	5.45746	3.33628	3.82579	5.24641	3.01078	4.84298	4.96209	4.19377	5.80168	5.72465	4.10266	4.15543
BZW1	0.0343174	6.68201	6.05702	6.04308	5.97338	7.68047	6.33324	4.19456	6.74228	6.87738	5.824	6.35279	7.84612	6.73173	5.42694	6.75302	7.21422	6.49041	7.296	6.8268	5.40293	8.05945	6.64904	6.3466	5.32912
C1QTNF3	-0.0463053	2.79077	1.64616	2.36457	2.52857	2.41143	1.40599	2.06005	2.87774	2.20163	3.30012	2.34199	2.7137	2.76765	2.14731	3.24184	2.35896	3.24793	2.88753	1.81147	2.11103	0.505891	2.46467	1.38405	2.32769
ME2	-0.169889	5.97315	5.53356	5.43663	6.45713	4.91552	5.77768	4.34696	5.74093	5.99955	5.17832	4.21645	6.76646	5.58015	5.28873	6.20828	5.62381	5.44261	6.29902	4.19377	6.32319	5.87135	5.44361	4.29939	4.90545
C5orf22	0.185383	4.07895	3.35191	3.4957	4.23266	3.80839	2.85599	2.85	4.14323	4.15543	4.76022	3.72901	4.85499	3.88264	4.13011	4.21101	5.00495	3.5373	4.39917	4.44162	3.71149	3.36877	4.41481	3.50462	3.58736
CCNT2	-0.193245	4.18903	3.18903	3.44758	3.94579	4.13011	4.35685	3.19219	4.15704	4.44626	4.08406	3.39917	4.69209	4.14486	2.78241	4.13504	4.71918	3.98368	4.25701	2.89724	4.01167	3.42089	4.61412	3.57168	2.14405
FAM135A	0.0147884	2.774	2.06695	2.57289	2.40599	3.06695	2.69822	3.03034	3.08916	3.65764	2.65306	3.02148	3.83289	2.03562	1.9486	3.13258	3.48543	0.111031	3.78346	2.848	3.01078	2.96347	2.09085	2.88166	2.70044
EPB41L3	-0.255113	2.28096	5.10727	5.09297	5.51979	0.0840643	0.0840643	5.2407	0.0565835	0.31034	6.28318	5.56499	0.226509	0.163499	4.61883	6.3818	0.0840643	2.33914	4.92837	0.0285692	4.16108	0.333424	0.85599	0	0.321928
TRAF5	0.370417	0.555816	0.0285692	0.0426443	0.201634	1.98185	3.21568	0.0285692	1.46989	1.07039	1.37851	1.60881	3.36877	3.8166	0.422233	0.918386	3.88947	0.659925	1.72683	3.97636	3.03386	2.29278	5.08576	2.32769	0.0285692
MRPL22	-0.179776	5.27873	5.17513	5.13258	4.73281	5.75702	5.56621	6.06156	4.84298	4.9644	5.16872	4.83996	5.45648	5.50208	5.01167	4.9905	5.63923	5.73958	5.49089	4.78607	5.11103	5.45878	4.39232	6.13689	4.22188
GEMIN5	-0.193151	3.72465	2.95606	3.50462	3.39232	4.3978	4.43563	1.69599	3.74093	3.69265	2.88166	2.4489	4.81762	4.0635	3.03914	2.90881	4.67073	3.61471	3.04789	3.22497	3.67129	4.21956	3.13093	3.74846	1.40599
NFE2L1	-0.162428	6.24031	4.91552	5.64587	5.7057	5.85947	5.79416	4.71039	5.99661	5.82985	5.28392	5.17153	5.94767	6.19495	6.46058	6.09592	5.12598	6.02746	6.53621	5.23036	5.68032	6.75047	6.37156	3.88655	3.99729
GSK3B	-0.0105569	4.31759	3.81147	3.97269	4.20006	3.82477	3.84699	3.47379	4.91934	4.22651	4.02414	3.82579	4.56194	4.30743	3.42492	4.0045	3.851	4.42761	4.67525	3.67243	4.80271	4.67299	4.07639	3.94953	3.5509
ERC1	0.0797338	1.91839	1.81967	1.98914	2.59932	2.73769	3.55459	0.773996	3.73769	3.33199	2.46989	1.57531	4.08151	3.35896	2.21412	2.34483	2.9279	2.41954	3.4019	2.71809	2.60407	3.54597	3.45549	1.32769	1.15704
XPO1	-0.338901	7.19643	6.25814	6.30305	6.54164	6.98288	6.98322	6.00675	6.52998	6.90087	6.50383	6.07125	7.82432	6.595	5.71342	6.84562	6.91994	6.76885	6.5744	6.04789	6.62015	6.5281	7.03771	5.29462	5.30378
RNF13	0.373537	4.16672	3.37573	4.14649	4.42626	3.48414	3.28983	3.66107	4.6017	4.1235	4.14241	4.38059	4.93357	4.00809	3.44228	5.23381	3.68818	5.18745	5.21296	4.22574	4.4363	4.40395	3.81865	3.80632	4.88313
PALB2	-0.116219	3.7137	3.78764	3.55213	3.32625	3.6893	3.33056	3.17632	3.24184	3.18587	3.42895	3.46336	3.78869	3.7148	2.82985	3.6427	3.45154	3.83188	3.70819	3.12102	4.06523	3.15381	3.52732	3.84699	3.2555
DOP1A	-0.19517	3.31615	1.72247	4.09001	4.55213	2.17951	2.43029	2.72247	2.73552	3.22959	3.54473	2.36457	3.11103	3.01078	1.79077	4.86888	2.91456	3.39369	3.0036	2.16993	2.27202	1.90689	3.41684	2.25096	2.05658
LYRM2	-0.250781	5.64962	4.09339	5.18626	5.42694	4.97085	4.82934	4.15623	5.05875	3.98732	4.13996	4.71094	5.4591	4.62	3.86394	4.97177	4.98048	5.12433	5.1914	4.68089	4.73606	4.89772	5.22188	4.77716	3.9514
BCKDHB	0.0203827	4.03826	2.53854	4.04876	4.09761	3.47508	3.82273	2.59216	3.87774	3.7845	3.22033	3.50589	4.08151	4.08406	2.4489	3.6837	4.03298	4.16269	4.31759	3.50208	3.80323	3.10098	3.98277	3.89724	3.14568
KAT6A	-0.128969	4.43496	2.60881	3.53978	4.4614	3.43162	4.02237	2.20789	4.77558	4.08236	3.80116	3.07382	5.1334	4.22574	3.50843	3.96347	3.5373	3.6017	4.01346	3.62059	3.66789	3.54226	4.28021	2.67807	2.78241
TUT7	0.102016	3.60407	2.75916	3.43029	4.13586	2.7761	3.63227	3.05658	3.25701	3.73118	2.83592	3.57046	3.43829	4.09761	3.06695	3.65535	3.41819	3.52482	4.49057	2.24489	3.04439	6.39523	3.22497	2.848	3.3978
TNPO1	-0.153693	5.9404	4.09677	4.19771	5.9148	5.26303	5.51254	2.9241	4.79805	5.52795	4.91361	4.93782	5.99481	4.82273	3.488	5.14037	6.07168	3.90977	5.37191	4.85499	4.7148	6.10056	4.53107	4.66619	3.75916
PLOD1	0.0523087	5.86666	5.35896	4.75168	4.56682	5.19022	5.05961	4.57592	4.29793	5.0197	4.69544	3.68594	5.19417	5.34092	5.8495	4.96578	6.011	4.91982	5.33985	4.926	6.27333	7.54651	5.16672	4.99186	4.54411
P2RX5	0.299604	1.54597	1.68257	2.38957	3.33199	2.12102	2.0321	1.35614	2.43296	2.27798	3.80116	0.485427	3.27202	5.10014	2.49057	1.79077	5.61147	0.948601	2.36177	5.32373	4.26078	4.73173	5.6279	1.86394	1.82375
ITGAE	0.0602146	4.91456	5.46565	5.63952	5.52576	5.16511	5.25058	4.85699	5.1823	4.46205	6.42911	4.26679	5.68426	5.54473	5.08831	4.65992	6.47962	4.66391	6.05268	5.76607	5.42593	5.0027	6.12681	4.85848	5.1127
DIS3	0.0591751	4.39369	3.52482	4.53854	4.22959	4.87725	4.36737	3.42358	5.03474	4.63981	3.56682	3.7845	5.61765	4.60703	3.19219	4.63865	4.74039	3.61471	5.55305	5.28688	4.63343	4.96532	5.19849	3.92315	3.42358
PIBF1	0.329973	3.15543	2.48543	3.46205	3.01792	3.52857	3.25852	5.44758	3.13914	3.57046	2.38957	3.36457	3.76129	3.49057	2.51349	3.52982	3.3799	3.87086	4.40735	3.83086	3.90207	4.30012	4.93452	2.5656	4.38612
TDRD3	-0.0545389	3.02503	2.96717	3.29425	3.59216	2.69822	3.14568	3.4957	4.79649	3.03386	2.57289	3.24945	4.31904	3.34908	1.25701	2.47508	2.96347	3.38128	3.82375	3.49057	3.24641	2.91265	3.30889	2.53605	3.34341
NUFIP1	0.157666	2.56803	2.33056	2.99277	2.23879	3.17473	3.10769	2.19535	3.11936	2.51602	2.20477	2.62994	3.88655	2.9542	1.31615	2.44361	3.15381	3.58376	3.72028	2.46728	3.36317	2.66221	2.774	3.56194	2.50589
PDS5B	-0.156944	4.67073	4.17871	4.79181	4.56864	4.75596	4.62352	2.51602	4.34127	3.55582	4.53169	3.60051	5.21296	4.47184	3.79077	4.64328	4.24793	4.94813	5.35861	3.02326	4.08406	3.38267	4.75916	3.30743	4.15299
OXCT1	-0.10583	4.31976	3.90014	5.06996	4.77294	3.18428	6.25172	3.41684	5.32481	5.4019	5.52513	4.05311	6.11249	5.47054	4.59694	4.91169	3.49057	5.22265	4.68201	4.36807	3.65535	5.10852	5.0045	0.443607	4.26454
RRAGB	0.328594	3.04439	0.0285692	3.82171	4.13996	3.28392	3.65878	2.89142	2.60881	4.48414	5.17513	3.46336	2.45418	3.69265	2.65992	4.31034	2.5509	3.67582	3.21723	4.15137	3.60763	2.22651	4.32769	4.61765	3.73118
CYLD	0.188375	3.24031	3.05137	2.98185	3.99005	3.52482	2.67807	3.09761	3.26604	2.92029	3.35473	3.82985	3.49185	3.53978	3.1635	3.78031	3.76977	3.99277	4.40463	3.49825	2.848	2.90304	3.76871	1.95977	3.7939
SLC27A5	0.117093	3.98641	6.35509	4.1643	4.10434	4.98732	5.9528	2.31034	5.77136	4.76288	4.09508	3.98459	5.43162	6.31034	3.67016	4.89482	5.77241	5.91169	5.86765	5.13217	5.56255	3.18269	5.70929	6.07746	4.06523
ZNF324	-0.187726	2.62994	2.89724	2.58256	2.1375	2.53107	2.49313	1.80323	2.98732	2.75702	2.16993	1.47508	2.58976	3.54473	2.25096	2.50843	2.6893	2.4489	3.30889	2.28096	2.19535	1.64155	3.04089	2.53854	1.65076
ZNF671	-0.0450367	3.36177	3.11936	2.50843	2.50843	0.263034	2.74846	2.71589	1.0072	2.73769	2.67129	1.62761	1.50589	3.45943	2.45418	3.12928	2.19219	3.67243	3.45943	2.89336	0.400538	0.0703893	4.13093	0.0143553	3.6837
ZNF586	-0.101213	3.62877	3.11936	1.8679	3.08916	2.59455	3.46597	2.44095	3.19692	3.67243	3.18587	0.62293	3.69933	3.67243	2.88557	2.02148	2.91648	3.87283	2.72465	3.16027	1.23266	2.35332	3.4489	3.13422	2.85
ZNF446	0.0124086	2.53854	2.66221	2.5509	2.83996	1.70487	2.03562	2.53356	2.90304	2.60881	2.33056	2.06695	2.36177	3.42492	2.38957	2.42492	2.56071	2.56316	3.24945	1.88362	2.08066	3.19692	2.67807	2.18269	2.41143
ZNF264	0.128504	2.09761	1.70487	1.85997	1.78241	1.5008	2.46467	2.07039	2.40054	1.8953	2.09085	1.83188	2.55336	2.82782	1.83188	2.08406	3.16511	2.80529	3.89918	2.08406	0.163499	2.57046	3.09424	1.37851	1.68706
RPS5	0.000738934	10.6268	10.8499	11.2649	11.0496	10.5352	10.8431	10.5487	11.2327	11.2932	10.4358	11.2037	10.8656	11.6213	11.0538	10.4891	10.8619	9.85714	10.9394	12.0669	10.8804	10.1513	10.6709	11.1854	10.7205
YTHDC1	0.0424962	5.82655	5.06695	5.02547	5.48091	5.65249	6.0955	3.75916	5.81121	5.84725	5.4192	5.06264	6.0607	5.81173	5.17393	5.48961	5.77689	5.67384	5.8339	5.3512	5.08746	4.99503	6.24945	5.04614	5.33807
CHMP2B	0.472264	3.1375	2.68706	3.56071	3.86691	3.52857	3.98094	2.23879	4.46205	3.9782	3.926	4.41684	4.5552	4.23036	2.72028	3.79805	4.50653	5.17353	5.19338	2.69599	4.38612	4.20711	4.69209	4.4522	4.05918
SMAP2	-0.337395	8.9602	5.39985	4.83592	5.65878	5.04177	5.2149	4.8802	5.5552	4.46336	4.81198	5.49506	5.57682	6.06264	5.73958	5.36457	5.10434	5.33664	6.15684	5.21023	5.51854	6.63575	6.12825	4.62585	5.08406
PPIE	-0.414246	8.61585	5.89336	6.16088	5.5292	5.96648	6.16812	5.55674	6.79883	5.50303	6.32571	5.87086	7.41726	5.65392	5.90593	5.97154	5.96463	6.25001	5.33593	6.74456	6.32841	6.63169	6.49713	5.35861	5.29572
ZMPSTE24	-0.362268	8.15477	3.9542	4.42492	4.02326	4.66221	5.15987	3.04789	5.26941	5.00585	3.8679	4.53667	5.81352	5.02813	3.24489	4.64616	5.0018	4.36737	5.21917	5.50271	4.24869	5.17552	4.88557	4.36667	3.3799
STARD7	-0.174507	6.60644	6.23821	6.65134	6.43796	7.12184	6.58271	4.80012	6.66974	6.50239	6.75956	5.48027	7.17652	6.56849	5.97751	6.6094	7.43003	6.54689	6.85811	6.13011	6.50621	6.11187	6.68271	5.91217	5.35473
NOA1	-0.137133	4.14975	3.63343	4.43563	5.73606	4.75969	6.28522	2.95233	3.98459	5.74174	3.87774	4.08831	4.22959	5.04658	4.41143	4.18269	4.1035	3.87873	4.3875	4.12102	4.46205	4.26454	3.81352	4.09761	4.02414
REST	0.0119099	3.6427	2.60881	3.12598	3.34483	3.58976	5.14241	2.47768	3.1375	4.78188	2.75061	3.1177	3.76129	3.926	2.63459	3.31615	3.43029	3.17153	4.28466	3.3799	2.79494	2.85997	4.1235	3.65878	3.19061
SSH1	0.130381	2.70487	1.73552	1.63691	2.9542	3.05311	2.17951	1.0635	2.89724	2.69153	2.33056	2.16672	2.90304	3.08236	2.91265	1.62293	2.86394	2.25701	3.33914	1.55582	2.20477	5.02503	2.58015	2.05658	2.1375
GSTP1	0.0757759	9.20391	9.68499	8.64317	8.072	8.99274	9.29715	8.2054	6.45368	9.06633	10.6635	9.32782	5.61765	8.9855	7.74772	9.38629	9.74997	8.50577	8.94997	8.58609	10.0765	8.93676	9.31177	9.16393	9.72767
APLP2	-0.263702	9.82074	6.62249	8.26833	8.31057	8.30752	8.81179	6.21199	6.66292	8.13761	8.89703	6.84436	7.74295	6.81519	7.06964	9.51167	7.83542	7.67709	8.99291	7.37321	8.36006	8.4557	7.23132	5.66334	7.32607
WBP11	-0.0284341	4.62702	4.58075	4.82579	4.83491	5.53419	5.70404	3.74739	5.65134	5.13381	4.85649	4.86295	6.20867	5.46989	5.12102	5.05007	5.5435	5.52544	5.36282	4.71754	4.77873	5.03386	5.66192	4.33199	3.53481
EIF3I	0.0435604	7.8275	7.65378	7.50764	7.71603	8.00366	8.19259	8.18264	8.59033	7.34234	7.46809	7.81121	8.5985	8.26646	7.66349	7.34412	8.47557	7.85842	7.65507	8.53675	8.19559	8.47642	7.54998	8.67846	7.053
TXLNA	-0.0732419	5.34908	4.99141	4.63343	4.57046	4.98687	5.60526	3.0993	6.54967	5.27612	4.30597	4.24565	6.2116	5.44559	4.86839	4.77558	5.55827	5.03914	5.58646	5.05181	5.02237	5.59842	5.32193	4.21878	3.94953
NCOA1	0.340102	2.61353	1.51096	0.321928	0.895303	2.37295	2.14405	0.356144	4.34412	2.67807	2.5008	2.5509	4.58616	3.83996	1.926	2.29866	3.7366	2.62059	3.41549	2.91456	2.57289	2.41143	4.36807	1.46467	2.24489
AGBL5	0.164044	4.06005	3.38267	3.12928	3.86691	4.64443	4.83137	2.29278	5.1127	4.55888	3.70155	3.40054	5.13422	5.11312	2.66676	3.94673	5.32733	4.81044	5.12102	4.08406	4.8505	4.88509	4.46793	3.44228	3.42761
KIF3C	0.126831	2.70044	1.91456	1.39506	2.57046	1.926	3.02148	0.903038	3.41007	3.43429	2.76765	1.88362	3.40327	2.73769	2.59455	1.87578	3.19535	1.70929	4.1811	2.0072	2.33056	3.849	3.64386	1.51602	1.81147
RAB10	0.138741	6.18982	5.17513	5.38957	5.16792	6.07318	5.88289	5.34979	6.40327	5.54936	5.85798	5.87529	6.79012	6.03232	5.12639	5.44493	6.86765	6.28392	7.05648	5.71699	6.38422	6.39489	6.18349	4.92172	5.40769
HADHA	-0.0800517	7.4884	6.34003	7.06663	7.46271	7.82056	7.3831	5.68566	7.00248	6.91946	7.41236	6.66732	7.23955	7.12143	7.09624	8.0393	7.5359	7.48293	7.13011	7.21053	7.91618	7.31578	7.08364	6.33557	6.0505
CAD	-0.25879	5.77452	5.69293	5.6091	5.39643	6.57092	6.63677	4.09001	6.87738	6.04243	5.06953	4.78973	6.7046	5.77531	5.2891	5.16511	6.17692	5.57924	5.76818	5.41684	6.35808	5.71342	5.91839	5.27016	3.94953
CD59	0.363574	3.57773	1.59455	2.07039	3.03914	6.51144	4.70377	0.0426443	3.50589	3.70708	1.926	2.98732	3.74524	4.68089	1.76129	1.75702	5.18824	2.49057	6.5345	5.05311	0.454176	10.2644	6.897	5.36072	6.8339
CD82	0.242915	5.24945	4.64386	4.94345	3.99005	5.72901	4.13996	1.1177	7.23064	2.87971	1.8679	3.06867	6.21897	5.78529	1.4489	5.57077	6.848	7.0955	6.25229	6.55888	5.0635	3.67807	8.4022	4.69599	6.68061
BCORL1	0.245237	2.25096	1.38957	1.82782	2.34199	3.26303	3.31904	1.09085	3.50843	3.48671	2.73985	1.81967	3.76022	2.8679	2.52105	2.52356	3.87578	2.73118	3.75809	3.27352	2.65992	2.66676	4.37921	1.81147	1.73552
ATRX	-0.0361484	4.52105	3.14731	3.47897	4.26529	4.1416	4.98322	2.15056	3.93074	5.21101	3.70819	3.56682	4.52607	4.52795	3.06005	4.22419	4.28836	4.12846	3.80941	3.80219	4.52168	4.74147	5.24451	3.21568	2.83188
AK6	-0.189903	6.73227	5.8107	6.14037	5.59485	6.53574	6.31922	5.73931	6.0054	6.83415	5.93546	5.32517	5.94837	6.52293	5.02989	6.49554	7.23525	6.88374	7.01424	5.44328	6.22632	6.62381	5.37016	6.63677	4.62
MYNN	0.000585588	3.56803	2.9222	3.18745	3.65878	3.15543	2.9982	2.29866	4.08066	3.70044	3.30889	2.93923	4.56803	3.84599	2.31904	3.67694	4.15785	3.65421	3.86295	3.02326	2.58976	3.88069	3.87676	2.88947	2.66448
SCAMP1	0.0417358	3.7301	2.96901	3.98641	5.18507	4.38681	4.24031	2.42492	3.41007	4.44692	3.82883	3.78136	4.1811	3.9279	3.20789	4.55949	3.71589	4.12846	4.99458	3.06695	4.50144	4.90063	2.81147	2.9982	3.94579
PREP	-0.398718	5.23266	4.72247	5.24982	5.32157	4.84248	4.44361	4.88215	4.45549	4.55275	4.26003	4.21568	5.02281	4.64212	4.29425	4.70432	4.95931	5.7046	5.0018	4.16993	4.59395	4.75596	4.08491	5.13955	3.8846
HACE1	-0.135646	3.25248	2.66221	3.23879	4.26228	2.81147	3.31179	2.43029	3.93546	3.99458	2.99458	3.37156	4.08406	2.5008	2.67356	3.00899	2.01078	4.39712	4.59455	2.30159	3.42223	3.62877	2.14078	2.78031	2.43029
SEH1L	-0.243736	5.42089	5.21023	5.56438	4.92029	6.07639	5.73796	4.30816	5.78162	5.55582	5.08661	3.75916	5.72629	5.56803	4.67976	5.68622	5.96832	5.46695	5.26791	4.36457	5.37051	5.08534	5.92362	5.6011	3.70929
WDR47	-0.235485	2.63923	2.36177	2.65535	2.94298	2.42761	2.33914	1.22651	2.07039	2.88947	1.62293	1.76129	2.65535	2.24489	1.37295	2.9222	1.82375	2.45943	2.80323	1.62761	2.10434	3.79805	2.43563	1.5509	1.53107
WDFY1	-0.103165	5.25776	4.70432	4.50653	6.21412	3.25852	3.12433	2.8679	3.70598	3.904	5.11645	4.32265	4.14078	4.07125	4.5656	5.99027	3.82782	4.04264	4.58616	3.7137	5.53294	4.66334	4.64443	3.43029	4.10014
SLC25A24	-0.00352701	4.56803	3.12928	2.57531	4.17792	1.98914	3.53978	2.03914	2.93168	3.61941	3.90207	3.85798	4.22033	2.70929	3.41007	3.97636	2.12763	3.2854	4.71918	3.60526	4.21101	5.01703	2.8339	2.39232	3.03914
MAP3K4	-0.251605	4.88362	3.76341	4.52732	4.25626	4.40735	3.15543	3.79286	4.57713	4.26754	3.98368	3.09592	4.75382	4.20006	3.05832	4	4.28392	4.53667	4.1643	3.27947	4.68032	3.39506	4.46401	3.64155	3.91934
PILRA	0.0957198	1.71809	1.64155	1.91456	3.09761	3.47119	1.64155	2.93923	1.84398	1.34483	6.06975	3.84699	0.432959	0.918386	4.75596	4.79701	1.83996	3.54102	5.44427	0.584963	2.64155	0.613532	1.13093	1.65992	2.70266
ZNF213	-0.16825	3.17951	2.51854	2.53854	2.89724	2.75275	1.95233	2.47508	2.32481	1.43829	2.29572	1.8953	1.82375	3.05311	3.05658	2.70708	2.24793	3.13422	3.39917	2.12102	2.87184	2.86394	2.60407	1.94486	1.94111
AKR1B1	-0.338724	6.57698	6.13976	5.85748	6.93652	7.52763	6.07596	5.67497	7.25446	5.8627	6.14262	3.64039	6.82845	6.50668	6.60214	6.93062	0.815575	3.54102	0.879706	6.24203	0.678072	7.41447	5.6522	7.37547	3.90689
CPNE3	0.239588	3.74524	2.95606	3.35755	4.49633	1.20163	0.0840643	0.963474	0.704872	3.58856	3.27202	3.97728	2.9279	0.111031	3.30305	3.34625	4.95699	4.04439	4.29866	1.93357	4.6094	5.02459	4.50906	4.77241	2.9241
RRN3	0.0531402	4.61706	4.21568	4.6311	4.74308	5.03782	4.11353	3.57168	5.58436	3.93074	3.9542	4.47508	6.30378	5.05007	4.01792	4.27352	5.16832	4.29499	5.54504	5.23496	4.07724	4.56133	5.6837	4.78764	3.69488
CTTN	0.213893	1.40599	0.782409	2.13093	0.933573	3.63227	1.70487	0.555816	2.18903	3.57046	0.485427	1.97085	2.04963	5.76368	1.73985	0.495695	6.39352	1.37295	0.536053	2.10769	0.782409	7.22901	4.84699	5.06781	0.367371
MTIF2	-0.21504	4.8846	4.65076	5.13381	5.12846	5.65735	5.25134	5.10769	5.58105	4.8748	4.80012	4.98868	5.75087	5.60881	4.17393	4.77926	5.10098	5.30743	5.52513	5.04308	5.49921	5.08449	5.04352	4.99955	3.61824
DDHD2	-0.00852796	5.23036	4.32553	4.60466	5.63459	4.01792	5.67412	3.18428	6.56864	4.90641	5.15097	4.62761	6.30433	5.4957	4.01257	5.19535	4.85748	4.93168	5.47444	4.92979	5.17752	5.73742	6.32445	4.21645	3.67694
EPS15	0.425451	4.46401	2.83996	3.15543	3.91456	3.39369	4.43095	3.22497	5.77321	5.01123	3.29572	4.06437	5.98391	5.26679	3.47768	3.53481	5.59096	4.43763	5.46597	4.77821	4.49442	4.54102	6.04963	4.41346	4.75702
ORC1	-0.217405	4.75489	3.7761	4.3067	5.2407	4.96486	4.45088	2.37573	4.55152	4.41549	4.1177	3.79909	5.30159	4.73335	3.92884	4.15299	4.97865	3.9514	4.40599	4.75756	5.02059	2.92979	4.4121	2.7761	3.43829
MGST2	0.00524213	6.85087	6.51602	6.77439	6.54705	3.74416	5.90593	7.13381	6.51916	5.59096	6.56163	6.79805	7.49929	6.59036	5.95652	6.77347	6.53993	6.26059	5.27016	6.81186	6.08555	2.48285	7.16571	8.35887	6.53154
CHERP	-0.0767938	5.55888	5.6946	5.16672	4.91982	5.4353	5.60792	3.87184	5.41481	5.20281	4.83845	4.71149	5.51191	5.21762	4.83643	4.85798	6.44874	5.57107	5.73091	5.31615	5.41583	5.04177	5.58616	6.62073	3.97177
ATG16L1	-0.264938	3.98823	3.84197	3.88362	3.48156	4.4019	3.29572	2.90497	3.7939	3.16993	3.62994	1.97453	4.2555	4.13093	3.30597	3.75382	4.22188	3.96901	2.73985	3.11103	3.20945	4.21023	4.36457	3.26153	2.57773
USP40	-0.0849804	4.05137	3.30889	3.83895	3.31904	3.28836	0.214125	3.77926	4.07296	2.10434	4.40122	1.5008	4.17712	3.63227	3.51475	4.28096	2.51602	3.4957	3.46728	3.25852	3.66562	3.90014	3.20477	2.58976	2.82375
POMGNT1	0.0249935	5.1334	3.30159	3.43563	4.15299	3.60644	4.4489	3.83289	5.03914	4.25701	4.75114	3.98277	4.87971	4.27128	3.44095	4.47508	5.32733	4.66619	4.67016	4.22728	4.36387	6.47849	4.65421	3.75382	2.83592
RAD54L	-0.317578	6.24317	4.64328	4.7126	4.87381	5.24489	5.3505	4.15056	5.22188	4.89869	4.90833	4.78503	5.93617	5.04789	3.86295	4.43296	5.62264	5.83895	5.17951	4.80529	5.3505	4.20163	4.8953	4.58436	4.23266
MAST2	0.00447724	4.52607	2.11103	2.65535	3.50335	3.61235	4.25852	2.16027	4.22882	3.84097	2.852	2.11103	4.63749	3.42895	2.67807	3.22959	4.13996	3.68257	4.39712	2.24793	4.2817	5.36877	3.9991	2.82171	2.53107
DNAJA1	-0.227909	7.79539	7.1813	7.04516	6.08194	8.66331	7.539	4.81558	6.32535	6.80181	6.74349	6.13258	7.13258	7.17073	5.62469	6.9607	7.7086	7.10675	6.71067	7.4733	5.61117	6.86753	8.20193	7.05637	5.71617
B4GALT1	0.199522	4.40871	2.75916	3.80219	4.50016	4.6011	3.31759	3.20633	4.10098	3.52231	4.51159	3.29572	3.99729	3.83188	4.91743	4.337	3.81044	4.21956	5.17832	4.2211	4.21878	4.24413	5.01792	2.94486	3.98003
CHMP5	0.113556	5.68173	4.77189	4.92837	5.5043	6.25776	5.19101	4.07724	5.23649	4.76022	5.35509	5.44261	5.26866	5.42626	5.15906	5.25437	4.55213	5.27352	6.00832	5.51728	5.1631	5.91576	6.16651	5.49281	5.08746
NFX1	-0.443149	5.72955	4.05572	4.3978	4.70099	5.70321	4.50716	3.6893	4.33485	4.78764	5.00944	3.99186	4.79546	4.99639	4.09761	4.96209	4.20398	3.87283	4.78869	4.19928	4.21568	3.91743	5.28429	3.6893	3.40871
DIMT1	-0.0370285	4.58316	4.60348	4.90593	4.90977	5.61883	5.36702	3.65421	4.69988	5.29866	4.20398	4.26828	5.36912	5.26303	4.27128	4.82731	5.97591	4.67525	4.79753	4.27947	4.62	5.58346	4.63401	5.43062	3.94392
IPO11	0.141232	3.55827	3.62644	3.88166	3.15704	4.36947	4.43296	2.54844	2.926	4.42694	3.18903	3.07211	4.1177	4.47573	2.57289	4.08661	4.94251	3.66448	3.59574	3.85	3.80632	4.35332	4.01436	4.16832	3.59455
EIF2AK1	0.187003	5.64933	5.32301	5.02059	5.6011	6.24203	5.68201	4.96947	6.07596	5.6401	5.72301	5.32841	6.02326	6.43546	5.2589	5.50684	6.10999	5.75168	4.80839	5.56773	5.972	5.77926	6.22747	5.94064	5.55643
EPDR1	0.0552627	4.63401	2.85	1.52105	3.46728	4.34341	4.6865	1.73118	3.84398	4.03914	1.65992	3.72683	4.26529	2.88753	3.10769	2.69822	3.66221	4.66676	4.79649	3.66903	4.96625	3.94767	4.8485	3.12102	2.36177
SNX10	-0.159277	3.97545	0.847997	4.853	4.66562	5.08831	3.14241	4.67299	1.8679	3.48285	5.11686	5.06609	2.60644	2.40327	2.27798	4.8268	2.44095	3.15056	5.39746	2.04614	4.72465	0.0703893	2.43829	0.678072	3.88753
SEPHS1	-0.228025	5.12267	5.46532	5.50811	5.3466	5.52199	6.09487	4.39849	4.93829	6.03606	5.15543	4.32193	5.75302	5.65507	4.40667	5.08746	6.58496	5.5404	6.16812	5.42425	5.66078	5.67356	5.23649	4.88801	3.16189
MRPL28	-0.0649048	6.28003	6.57471	6.29829	5.85649	5.8166	4.44559	5.9782	5.86962	4.62117	6.20574	5.35085	6.03936	6.24755	5.73633	5.83769	6.40769	6.44079	6.18408	5.57168	5.42962	6.61279	6.54257	6.77742	5.19456
ITPKC	0.320973	1.97453	2.41143	2.30451	2.32481	1.848	1.774	1.49057	2.27798	1.98185	2.02148	1.81967	2.14731	2.54102	2.38681	1.848	2.38681	1.82375	2.87381	1.88753	2.68482	2.91648	2.71809	2.04963	2.57289
RBM22	-0.224481	5.65249	5.16912	5.20203	5.84599	5.26529	5.61677	4.69933	5.18745	5.45615	5.39403	5.29241	5.52888	5.4614	5.68678	5.44328	4.95047	5.8387	5.93074	5.36107	4.76394	5.32661	4.22728	4.80374	5.07168
TMED2	-0.188809	6.88399	6.27352	6.58946	6.34891	7.36186	6.73796	4.39985	6.749	7.00191	6.5932	6.13607	7.21335	6.61058	5.64068	6.76686	6.0555	6.14608	7.28031	6.20163	6.47508	6.67044	7.04614	5.72137	5.58496
ZFAND6	0.348867	5.58105	5.42223	5.7666	5.65821	5.66704	6.17672	4.1177	6.92861	5.63691	6.42391	6.03892	7.44137	5.98322	4.73823	6.47946	7.15816	6.02813	6.64126	7.42886	6.4441	5.02414	7.32328	6.09529	6.14078
TXLNG	-0.00204169	3.23113	3.29131	3.7148	3.76022	4.13422	4.03386	3.05137	3.95699	4.05137	3.75489	3.37295	4.5097	4.00809	3.12928	3.49057	3.59932	3.87578	3.8885	2.81147	4.23113	3.00899	4.6565	4.51854	2.52857
LAT2	-0.243938	7.6962	7.25001	8.25659	8.68054	8.10779	1.9782	8.0278	4.48864	0.863938	8.67599	7.60043	4.25096	5.51979	8.85866	8.01787	3.7137	7.89191	8.72683	5.97154	7.47005	0.250962	4.16027	0.15056	6.6978
HUWE1	-0.178449	6.24355	5.70349	5.84775	5.69404	6.20183	6.36737	4.97728	6.0568	6.51507	6.1179	5.27984	6.27538	6.34038	5.54504	6.08491	6.21062	5.94111	6.05311	5.97338	6.74443	5.4446	6.53885	6.08279	4.43962
ZW10	-0.0522038	3.9644	3.17153	3.78764	3.59694	4.29646	4.6893	1.76553	3.98094	3.81044	3.55949	3.45812	4.70432	4.05137	2.75061	3.8268	4.53232	3.75061	3.75702	4.41007	3.51223	3.90689	3.92505	3.33771	2.95233
ALG9	0.0782348	3.66789	3.27053	3.6311	4.04439	4.37921	4.64328	4.65821	4.26379	3.45022	3.90111	3.33914	4.44294	4.23802	3.53481	3.74308	3.69599	3.88753	4.36247	3.96625	3.94579	3.82477	3.56316	3.97177	4.05745
ACOX3	-0.439778	4.1127	3.8166	3.38405	3.58976	3.77083	3.59932	3.29719	2.70708	3.19061	3.92505	1.9855	2.46205	3.07382	3.73335	3.60526	2.64155	3.72465	3.27947	1.84398	4.0036	3.58736	2.60644	2.63691	2.89336
MTMR2	0.00986837	4.36457	3.10936	3.51979	3.74093	4.31976	4.65535	2.73769	3.75168	4.14731	3.23266	3.77716	4.77768	4.14486	2.82579	3.96993	4.5404	4.22728	4.71094	4.20711	2.71149	4.13258	4.04002	3.83592	3.38957
PPP1R15A	0.325929	4.58436	4.81301	4.83996	5.26754	3.86691	4.28392	5.19771	7.17163	3.45812	4.46793	5.00854	5.64587	6.27594	6.95791	5.44062	5.33878	4.72356	5.848	6.01659	5.06867	4.79077	6.49265	5.95024	4.73985
TRIP6	-0.442424	6.06264	6.13914	5.81762	5.8212	5.99481	1.18903	4.90304	1.04264	4.1375	4.07639	0.389567	1.02148	0.895303	7.20916	4.72356	1.65992	2.68706	6.34394	0.238787	1.774	6.51712	0.545968	4.82833	0.454176
FTL	-0.101611	13.1153	12.5598	11.5513	11.2445	10.3325	10.8351	11.4998	11.1097	10.9272	11.8174	11.4962	11.135	11.043	12.0861	12.1587	11.6822	11.9517	12.2318	10.9748	12.603	10.7222	11.7475	11.1717	12.2765
SRRT	-0.442392	7.14975	7.35465	7.03408	6.59365	7.55336	7.20965	6.66974	6.86171	6.72028	7.2866	5.36632	6.86121	7.04374	7.28734	6.67539	7.44054	7.4465	7.40114	6.09085	6.57243	6.05007	6.51381	6.52105	5.52982
BAX	-0.36801	7.5585	9.21101	7.64248	8.27487	7.20075	6.96151	6.10098	7.85381	6.70307	7.76759	5.97522	7.0321	8.8495	7.34705	7.07553	6.77056	7.84599	7.67976	6.82706	6.6642	6.56484	6.87271	6.63706	7.23812
NLK	0.293651	3.14078	2.33914	2.62761	3.18903	3.13093	2.94486	2.03914	5.35085	3.68482	2.74416	2.85	5.51696	4.88313	1.67356	3.22497	4.47897	3.75916	3.53481	5.14241	2.31034	3.04089	4.54288	3.71039	3.66903
PIGS	0.0119087	6.00585	4.93263	5.14078	5.80426	5.85574	4.3875	3.10266	5.71809	5.4591	5.30122	4.82426	5.98687	5.55182	5.45055	5.72629	5.4219	6.48575	5.81788	5.50684	5.70487	4.63227	6.03672	3.58856	5.27016
ATXN7L3	-0.0728928	5.02281	4.63923	4.5292	4.91934	5.11645	5.23917	4.1811	5.73498	4.96394	4.98185	4.82731	5.69655	5.30049	5.22265	4.92125	5.13709	5.82833	5.04832	5.37295	4.47249	4.25701	5.67976	4.25172	3.87381
PGS1	-0.24238	5.13011	4.46858	4.71425	4.95	5.05875	6.02525	3.45943	5.1811	6.0766	5.21374	4.09845	5.25172	4.74846	4.75061	4.94392	4.59096	6.22052	5.97499	3.63459	4.3875	4.87184	5.19771	3.40054	3.23419
PSMC5	-0.0516296	7.16269	7.40224	7.2148	6.57304	7.38819	8.17732	6.96347	7.86146	7.81602	6.71562	7.09487	7.89306	7.20574	7.25427	6.87467	7.27324	8.15821	7.56468	7.5194	6.29682	7.63981	7.0797	7.32634	6.90617
UIMC1	-0.158205	4.7761	4.93923	4.52982	5.0036	4.77979	4.9855	4.62527	4.64097	5.06437	4.55888	4.69877	4.71699	5.2075	4.16912	5.18864	4.7137	5.27463	5.01792	4.10014	4.64731	5.58466	3.72356	4.43296	4.52669
MMP2	-0.0932232	4.17313	3.73877	0.238787	1.21412	2.05658	2.72028	2.01078	1.05658	2.16993	0.411426	2.19535	0.978196	2.38405	5.19574	4.29866	0.526069	1.20163	1.18269	0	4.87529	7.69467	2.1375	1.11103	0.400538
LPCAT2	0.0850545	4.28688	3.24184	3.99277	5.13011	3.63923	4.93216	3.54844	4.32193	5.22689	4.53792	5.21023	4.57471	2.80735	3.33771	3.32193	3.59694	5.15745	5.32121	3.33056	4.42761	3.57894	4.16108	2.59932	5.78031
OGFOD1	-0.144598	5.86839	5.05007	5.59723	5.08576	6.10245	6.27705	3.926	6.42593	5.65935	5.14893	5.08491	6.10266	6.64039	4.62761	5.19101	5.85549	5.40054	6.25437	5.2149	5.58526	6.23974	6.0974	5.27575	4.0054
SH3BP2	-0.289656	5.5157	4.96116	4.74416	4.50526	4.73552	3.37434	4.90881	5.91265	3.24641	5.12598	4.41752	5.28207	4.78293	4.87234	4.8802	4.70874	5.60526	6.07361	3.32193	5.2709	3.01436	4.15623	2.25399	3.85798
NOP14	-0.4913	5.5601	5.28873	5.56925	5.56133	6.40344	6.33682	4.7241	5.98504	5.38819	4.82528	4.53232	6.10182	5.87455	4.85898	5.1375	5.55428	5.70653	5.29829	4.66846	5.40837	4.65191	4.66846	4.46205	4.1375
ADD1	0.145985	5.93805	5.89797	5.40905	6.15502	6.455	5.7498	5.87578	6.46205	5.69599	6.30925	5.21335	6.33628	6.7412	5.99095	5.58256	6.07318	6.26247	6.42861	5.81455	5.78555	5.84423	6.46761	5.13873	6.55321
L2HGDH	0.0478012	2.26303	1.91839	2.52105	2.66448	3.14568	3.88362	1.15056	4.07211	2.83188	2.4489	2.21412	4.64097	3.27202	1.42761	2.30743	4.22574	2.54597	2.70044	2.34767	2.82171	3.31325	3.60644	2.33628	1.66903
TXNDC16	0.335741	2.54102	1.18269	1.48027	2.45943	2.08066	2.31904	0.321928	2.12433	3.12267	1.83996	2.21101	2.848	2	1.30451	2.35614	2.54844	2.14731	3.18903	2.14731	2.43029	2.10098	3.08916	4.03298	2.19219
RTRAF	0.199974	6.97476	7.28642	7.20477	7.40224	7.72035	7.63735	7.52693	7.01022	7.64933	7.14272	7.1645	7.22014	7.51436	6.80723	7.19908	7.11987	7.66988	7.77222	6.88801	7.36001	7.44104	7.09729	8.31356	7.55926
GMCL1	0.0189858	4.1375	2.9855	3.59694	4.27277	4.51286	4.21568	2.0321	4.73606	4.31976	3.21101	3.37156	5.4002	4.06781	3.45943	3.81762	3.6565	4.0197	4.75862	4.05137	4.1375	3.47508	4.0917	2.47508	3.88947
SF3B2	0.166324	7.32048	6.66519	6.80116	6.8775	7.53582	7.01391	6.31687	7.33887	6.90099	6.87811	6.81647	7.4822	6.98014	6.87517	6.84147	7.38068	7.17792	7.27258	7.39163	6.83555	7.09159	7.26106	6.97062	7.16007
KLHL42	-0.45403	4.72356	2.76553	2.46989	4.28318	4.02857	3.90207	1.89918	4.28762	3.74524	3.38681	3.39917	4.20006	3.07553	2.48543	3.32048	3.28096	3.21723	4.32912	2.60881	2.84197	3.30012	3.20477	1.70929	1.25701
GNAS	0.296036	8.99588	7.90617	7.98891	8.55005	9.85284	9.43694	9.65369	8.81641	9.45374	9.37112	8.36632	9.17864	9.11541	9.06313	9.73339	9.06601	8.2644	9.76035	9.31313	9.03307	9.47604	9.48784	10.0353	8.59335
DNM1L	-0.198513	5.65992	4.58976	5.01792	5.59305	5.97131	5.93168	4.78084	6.20477	6.02791	5.60999	5.2407	6.7654	5.6851	3.71149	5.41886	5.84046	5.22265	5.87725	5.07852	5.32984	5.31325	6.07596	5.16269	3.69377
PHACTR3	-0.480721	6.51791	4.02148	5.80993	6.66391	3.48027	0.250962	4.34199	0.0143553	0.275007	5.88679	3.21257	0.669027	0	5.91097	5.24603	0.0285692	1.59455	5.71754	0.0143553	4.92695	0	0.0426443	0.454176	0
ERGIC2	-0.405309	6.1809	4.75702	5.07468	5.33914	6.42307	5.77742	4.69432	5.05658	5.43363	4.8846	5.16752	6.10999	4.93923	3.96901	5.31252	5.12309	6.23993	5.42593	4.66334	5.20203	5.57652	4.88704	3.95233	4.16591
AURKA	-0.17294	6.46156	5.53916	5.52763	5.70708	6.60541	6.69961	4.42425	5.29976	5.59515	5.14853	4.85649	6.2211	5.85375	5.15745	5.44526	7.01357	5.80323	5.62527	5.0268	6.61294	6.89809	6.0691	6.73796	3.76871
PIR	0.140235	4.60585	1.63691	1.18269	2.60644	1.85997	4.67412	2.78241	1.46989	2.37295	4.07296	1.32193	3.19219	5.25285	2.0635	2.51349	4.80271	3.36177	4.77873	2.1375	5.02724	3.05485	5.88923	4.36317	1.20163
AAMDC	0.368044	5.07767	4.51033	4.37295	2.90304	4.90159	3.9364	4.32481	3.8846	4.43563	4.34696	4.68594	3.66334	4.78293	4.04527	4.42626	4.80839	5.30706	4.43029	6.01078	4.31832	5.91361	5.41616	5.848	5.32948
RFX2	-0.35912	4.09508	3.86888	3.27947	3.70044	2.87381	3.20477	2.37016	2.73985	3.56194	3.01078	3.17473	2.46205	3.02503	2.23573	3.24641	3.58376	3.86295	4.67525	1.46467	4.5292	2.73769	0.613532	0.687061	2.73552
METTL2A	-0.0632163	3.80323	3.14241	3.33199	3.5008	3.87086	4.18269	2.23573	3.57168	4.09592	3.18269	2.94298	4.57833	3.86295	3.40735	3.32337	4.06437	4.18587	3.67356	3.53481	2.97453	4.23649	3.72683	4.15381	2.15056
ALG6	-0.192001	3.52732	3.09761	3.59335	3.20477	3.7148	3.58856	3.05485	3.72574	3.17632	3.33914	3.80219	4.75969	3.52105	2.27798	3.81044	3.75061	3.33342	3.74308	2.88557	3.29572	3.56803	3.26003	3.13422	2.53854
CNOT3	-0.039985	5.61117	5.69766	5.23419	5.02015	4.98322	5.51128	4.70321	6.27109	4.98823	5.09508	4.35896	5.84248	5.73281	5.85649	4.95093	5.70044	5.75702	6.16611	5.1631	5.25814	4.86888	6.06393	5.41954	4.77926
PTPN4	0.38804	2.18269	1.71809	1.69599	1.42761	2.83996	2.82375	1.22651	2.78031	1.8953	2.05311	2.24184	3.17473	2.93168	0.918386	2.58496	3.83592	2.46467	3.72137	2.0072	2.58976	3.61941	3.5097	2.41954	2.60644
DDX18	-0.121416	5.68734	5.21568	5.71727	5.55213	6.24451	5.99887	4.34199	6.6097	6.08704	5.13422	4.94111	7.07007	6.02215	4.63749	5.35368	7.17782	5.38888	5.88118	5.85873	5.60407	5.85699	5.96162	5.45483	4.12267
KHSRP	-0.253927	8.01848	7.71418	7.8062	7.33217	7.50764	7.424	5.00988	8.163	7.83857	7.54782	6.89869	8.00445	7.86511	7.55267	7.40871	8.1165	7.48591	8.48095	7.4536	8.11666	8.05001	6.86555	6.51822	5.38024
GNA11	0.144736	2.81762	0.454176	2.3978	0.790772	2.51854	1.10434	0.704872	1.46467	2.16993	2.36177	2.37016	2.05658	2.40871	2.53854	1.22033	3.91073	0.400538	2.45681	2.64155	1.65992	4.96394	2.5008	2.88753	0.748461
EDEM2	0.0867865	4.84398	3.98914	4.21801	4.96671	4.2211	4.36036	3.7366	4.45022	3.99095	4.8953	4.23879	4.46401	4.14241	3.36177	5.4941	3.74308	4.79546	5.77004	3.6311	6.4271	5.24146	3.65764	4.25626	4.51791
DNMT3B	0.192507	2.07039	2.75275	2.85997	2.38681	5.47476	2.34767	1.67356	5.67356	2.21723	2.16027	2.50589	6.55013	3.9607	1.80735	2.22651	5.08789	1.65076	3.09085	4.70377	2.61589	2.33342	4.59932	4.95093	3.28392
TPX2	0.090029	6.32229	5.58135	5.68342	5.96093	6.44311	6.39815	4.49889	7.28068	5.76155	5.51759	5.27016	8.09191	6.48623	5.59455	5.6499	7.4266	6.19594	6.1102	6.00585	7.37434	7.12928	6.44211	6.76208	4.88411
PDRG1	0.157353	4.20945	3.848	4.0268	3.28836	4.41886	4.63749	3.40599	4.93404	3.94767	3.50716	4.14405	5.11562	4.15947	3.51979	3.71699	4.90593	4.65134	4.61648	4.36667	4.97636	4.02768	4.42089	5.12681	3.47249
ANKRD10	0.000327088	5.98185	5.64674	5.68201	5.89748	5.65449	5.87381	4.85699	6.1819	6.14119	5.83213	5.82324	6.03188	5.93216	5.11353	6.60822	5.7658	6.80181	7.39266	5.13586	6.59335	5.61677	7.19249	4.62234	4.78764
TGDS	0.298002	4.06695	3.48543	5.01346	3.60999	4.8125	4.24489	3.96532	4.45878	4.23955	3.69933	4.82934	5.22458	4.26529	3.37016	4.96625	5.98709	4.74739	5.91791	5.13258	5.07596	4.51538	5	4.14405	3.97453
COQ9	-0.245266	5.55121	4.89966	5.17433	5.00988	5.3565	5.59096	5.37782	4.6792	5.19928	5.32301	4.42828	4.88411	5.52795	4.92458	5.30998	5.31796	5.11437	5.72083	4.65076	5.57743	5.93452	5.39609	4.90785	4.01346
KIF9	0.0856351	3.23266	3.45812	3.63807	2.71809	4.13832	4.11103	2.10434	3.66334	3.41684	3.12763	3.51979	4.10685	3.6427	2.08066	3.40871	4.0197	4.86987	3.62994	3.76871	3.95606	4.55275	2.88557	4.42962	2.61589
CRLS1	0.188719	4.30305	5.27947	5.72928	5.46565	5.98596	5.14608	5.63401	5.42559	4.90256	5.05224	4.56986	6.04527	5.15056	4.43962	5.30998	5.6241	5.95722	5.64299	6.15502	6.01926	5.41549	4.97774	6.45681	4.8166
ATRN	-0.205239	3.54102	4.36036	3.65878	4.20398	3.27798	3.41684	1.63227	2.27501	3.96532	3.74201	3.95047	2.63227	3.50843	2.69377	4.4121	2.96347	2.70044	4.37504	3.09255	4.38059	4.35403	3.72356	1.91456	2.32769
SMOX	0.214373	1.64616	3.43429	3.72247	2.83592	3.37573	1.57531	3.49697	4.15137	0.687061	3.39506	3.03034	2.49825	2.87381	5.71287	4.38681	4.52482	1.0072	4.68201	3.38128	3.90593	4.15218	3.11936	4.49378	1.98914
FKBP1A	0.233332	7.08034	7.54427	7.87141	7.04505	8.25616	8.44923	6.58916	7.35421	7.8421	7.90424	7.03617	7.76759	7.78829	7.16169	7.52834	8.03634	8.03254	7.87756	8.29591	8.39673	8.80678	7.94175	7.87725	7.18844
NSFL1C	0.28015	4.79597	5.48736	5.82349	5.61353	6.54612	6.11936	3.97911	5.6837	5.90689	5.95396	4.97774	5.56163	5.78293	5.17073	5.41007	6.5404	6.17133	6.28411	6.27761	6.86344	6.61279	6.47314	6.20085	4.95559
C20orf194	-0.375266	2.62059	3.44228	2.80941	3.62644	2.51096	1.93357	1.852	0.83996	2.59216	2.44361	2.25399	0.970854	0.250962	2.14405	3.05137	1.29278	2.19219	3.28096	0.713696	2.71149	3.0993	2.15704	1.28688	1.29866
ZNF343	0.00613234	2.15704	2.32193	3.23879	2.67582	3.0197	3.2032	1.64155	2.6017	3.22651	2.63691	2.41954	2.93168	3.14078	1.87184	2.37851	2.71809	3.04614	3.2032	3.01614	3.87184	3.46074	2.64386	2.94111	1.28096
CPXM1	0.377802	0.565597	1.34483	0.464668	3.78031	5.82782	3.45681	0.454176	4.70708	1.42761	0.333424	2.56316	4.04614	3.55949	0.83996	0.422233	5.10056	6.11998	4.23113	3.90977	1.38405	0.0426443	4.47897	4.4522	5.55428
MAVS	0.123519	3.21878	3.67582	3.65535	4.07125	3.90689	4.07211	2.64155	3.82883	4.49185	3.82477	3.36317	3.45943	4.17552	3.64616	3.90593	3.63459	4.2211	4.65764	3.65878	5.19613	4.20006	4.14486	2.98003	3.04614
XRN2	-0.0195435	6.40276	4.88557	5.97315	6.03452	6.02237	6.01636	2.63227	5.70984	6.29168	4.81147	5.31325	6.13258	6.06113	4.99548	5.44062	6.15441	5.21878	5.75489	5.92386	5.66789	6.04701	5.91672	5.68622	5.36177
KIZ	0.0267603	4.54411	2.83996	4.15137	4.95977	3.71699	3.24489	4.14078	3.82375	4.21179	3.56682	5.91886	3.71918	3.74201	3.87283	3.32769	3.74739	3.28392	4.40531	3.9486	4.59276	4.46597	3.91839	3.87086	4.03034
DYNLL1	-0.276015	9.17592	8.63739	8.49033	7.84134	9.168	9.14985	7.94339	8.41375	8.20242	7.92701	7.95262	8.64861	8.59107	8.12252	8.13894	8.52853	8.7038	8.07044	8.90165	8.31379	8.85206	8.72462	9.22653	7.66434
TESC	0.0625337	4.33271	7.08661	5.08831	5.34979	8.72311	4.85997	5.66505	6.62644	4.72738	3.82375	6.88679	6.87541	4.76977	6.34589	5.08194	5.86814	9.79157	7.3644	6.08023	6.14792	0.176323	6.39489	3.94953	7.18319
SNX5	0.1693	6.07232	6.71699	7.42861	7.36256	6.8913	6.94075	6.91898	6.97166	7.02037	6.61839	6.67511	7.14588	8.50323	6.55228	6.62059	7.2867	6.3482	6.39643	7.45376	7.02901	6.98709	7.78398	7.83245	6.42509
RPL6	-0.0323919	10.6217	10.7653	10.9189	10.9003	11.3188	11.1212	11.919	11.0444	11.4501	10.6403	11.8286	11.2652	11.0181	10.6515	10.7549	10.4782	10.2504	10.2127	11.4326	10.4851	10.1835	10.0658	11.3225	11.6718
MAPKAPK5	-0.367657	5.25512	4.87135	4.64501	4.62293	6.18329	5.30268	3.40054	5.14771	4.80993	4.6565	4.25475	5.25285	5.25663	4.65592	4.95606	4.8505	4.5741	5.07938	4.23649	4.68706	4.59574	4.8166	4.46401	3.65992
ESF1	-0.0398349	3.46467	3.48156	4.74846	3.94017	4.79129	4.4822	2.87774	4.19535	4.26828	3.26604	3.69488	4.76765	3.99186	3.08746	3.88362	4.23802	3.9542	3.9514	4.8674	4.21023	4.21956	4.31687	4.46532	2.71589
RBBP9	0.431347	1.05658	1.63227	2.15381	2.08406	2.40871	2.70487	0.895303	1.74846	1.8953	2.84599	2.27202	2.20477	2.25096	2.30743	2.02148	2.36457	2.33342	2.18587	2.31615	3.10769	3.38128	2.41414	2.60644	1.64616
ANAPC5	-0.427113	7.10171	7.11499	7.27128	6.98379	8.06496	7.44286	6.40786	7.43596	7.32337	7.0376	6.47427	7.38345	7.13935	5.81686	7.06501	6.14425	7.19594	7.35103	6.26153	7.05572	6.03276	7.47565	6.32409	6.19219
SLC23A2	-0.160833	3.25852	3.64386	3.49442	3.57531	3.33771	3.05658	2.64616	3.0036	3.37434	4.01436	3.15218	3.33771	3.02857	4.15381	4.55029	2.87971	3.17473	4.0917	3.45549	4.5097	3.41819	3.31759	2.33628	1.75275
SLC8B1	0.00471717	4.42559	3.86493	3.69488	4.26228	4.95047	2.30159	3.14568	4.09424	3.59813	5.46695	4.31832	3.54473	3.68257	3.36177	4.19456	4.83086	5.08619	5.3466	2.9486	5.06824	2.44626	4.59156	3.49953	3.7126
TMEM230	0.213782	5.76368	6.23936	6.8525	6.19673	6.33825	6.29112	6.33557	6.25285	6.13504	6.23707	6.38301	6.61043	5.86518	5.6453	7.09687	6.11749	6.03386	6.79986	7.16732	7.00158	6.60555	6.25701	7.45401	5.86096
KDM2B	-0.592828	6.00966	5.59186	5.40701	6.21335	5.9191	5.24184	4.22728	5.0018	5.32337	5.22381	3.70598	5.39541	5.06738	4.51159	5.78921	4.14568	5.0635	5.32157	4.22574	4.94205	3.46074	5.10811	3.27501	4.17632
TASP1	-0.0146225	1.774	2.41414	3.42223	2.76341	3.22033	3.14241	1.95606	2.55827	2.73985	2.14731	2.57046	2.91839	3.16993	2.26003	2.65076	1.96347	2.84398	2.90497	3.07724	2.68257	2.73335	2.98003	2.88166	1.66448
GCN1	-0.0676075	5.98596	4.49953	5.0648	5.01123	6.05072	5.73281	2.85997	6.25814	6.02901	5.28651	4.40871	6.39729	5.79675	4.79025	5.04876	6.09487	5.77716	5.38647	5.07039	5.12019	5.16792	6.77056	4.25096	4.28392
RPLP0	-0.00742002	11.7536	11.7364	11.9484	11.8199	11.8997	11.7495	11.4513	12.3552	12.7268	11.6448	12.5399	12.0677	12.0784	12.2063	11.4751	11.5375	11.2566	11.4172	12.5618	11.6485	11.5136	11.124	11.1692	12.5347
PXN	0.507527	3.82579	0.536053	1.75702	0.739848	1.47508	4.18666	2.15381	0.475085	4.87578	4.95327	4.68706	2.45681	2.20477	2.81762	2.8953	5.25663	5.72683	5.52136	2.52105	3.7366	7.2949	5.12516	3.62994	5.02192
TRMT6	0.0492238	3.07895	3.95047	4.53481	3.73877	4.7148	4.04701	3.2032	4.5008	3.55582	3.49825	3.81558	4.44956	4.25399	3.16189	3.62527	4.09677	4.43229	4.66391	4.7939	4.51349	4.1035	3.7666	4.78136	2.68032
PEBP1	-0.262091	7.33709	7.99707	7.70977	6.99277	8.90063	8.4192	7.66007	6.94533	8.22366	7.58451	5.83365	7.53341	7.5539	6.50224	7.33145	7.81346	7.86115	7.50327	7.15259	7.64053	7.47379	7.72799	7.51759	6.97269
BRAP	-0.12943	3.66676	3.32048	3.46858	3.41007	4.41886	3.65191	3.44758	4.36667	3.67356	3.30451	2.99639	4.33414	4.12433	3.00899	3.39643	3.84097	3.24184	4.30524	3.06005	3.39232	3.16189	4.26903	3.98094	2.84599
ERP29	-0.502848	8.65191	8.30273	8.41058	8.47508	8.90971	7.07916	7.96653	7.14119	7.85131	8.42228	7.59604	6.81992	7.98971	7.65585	8.81928	6.41092	7.59798	8.48301	7.69676	7.34846	7.13873	6.91886	6.94579	7.51728
FUS	-0.448629	9.52034	8.9913	9.14422	8.88203	9.47752	8.34567	8.69547	8.92267	8.03562	9.05352	8.02984	8.97016	9.169	8.69631	9.07457	9.22757	9.27682	9.02226	8.53912	8.61298	8.20154	9.18011	8.80061	7.53908
IGBP1	0.00217458	5.05398	5.30159	5.3875	6.03958	5.77268	5.12184	4.48478	4.62234	5.19889	5.17113	6.13134	4.39849	5.82477	5.83415	5.31433	4.68874	4.8166	4.93263	5.37782	6.08257	5.49313	4.66959	6.27128	4.83643
FXYD5	0.692537	6.6799	6.12309	8.08044	7.43137	5.78738	8.81766	8.8479	8.69223	8.25177	8.29462	8.34434	7.50724	7.70002	7.74315	7.95489	9.62227	7.91648	9.44512	8.84602	8.92674	9.8706	8.65008	9.04843	9.96204
ZNF302	0.265768	4.31397	3.49953	3.55582	3.12763	3.34908	4.1914	3.39917	4.41346	3.68706	4.27053	3.1635	4.49313	3.99367	2.51349	4.23726	5.30925	4.61706	4.16511	4.35262	2.90497	3.93923	5.53699	5.39266	3.96255
GRAMD1A	0.215714	4.55459	4.93546	4.57107	5.47281	4.43095	5.49442	3.73985	6.13217	5.96278	4.16189	3.60881	5.53636	5.60466	4.8953	4.04614	7.11915	4.74739	5.77426	4.6792	5.26379	5.63517	5.94533	6.23036	4.57289
CDIP1	0.217044	4.05572	5.27128	3.49697	1.76553	4.38888	4.31542	3.03562	5.00988	4.13832	5.40327	4.39025	5.19338	0.604071	4.94298	4.40054	4.71094	4.89385	5.20594	4.68089	3.82477	4.43429	5.60674	4.31034	4.95931
GANAB	-0.181096	8.58079	6.89748	7.07628	7.43754	7.98925	7.84392	5.97705	7.16481	7.8301	7.47687	7.05148	7.31814	7.78306	7.49265	7.80549	7.34207	7.23487	8.04018	7.42803	7.47671	7.77959	7.79546	6.50271	6.93298
GMIP	-0.415181	5.41583	5.68342	5.18626	5.55704	4.27202	4.40395	3.83086	3.99095	4.60348	5.04002	4.46728	2.8679	3.52231	5.4019	5.10056	3.99548	5.44659	5.6744	3.36317	4.96023	2.98914	3.36737	2.4489	4.30232
RBM41	-0.0345785	2.87971	1.8953	2.53605	2.74416	2.79909	2.86592	1.38957	3.62877	2.77189	2.76765	2.53854	3.49313	4.72683	2.28392	2.08406	3.75916	2.41954	3.69153	2.62293	2.05311	3.32337	3.926	2.47508	0.687061
BIRC5	-0.158157	6.32373	6.02989	5.47703	5.59544	5.848	7.10287	4.1635	5.71973	6.06156	5.34979	5.25663	6.54782	5.7761	6.00338	5.53636	6.56301	6.57456	5.89482	5.73796	4.7703	6.69613	6.08364	5.85798	4.53045
MLF2	0.260919	5.82807	6.96913	6.40854	6.08002	6.95373	7.11967	5.52325	7.09814	6.79168	6.84097	6.17173	6.85711	7.17043	7.19367	6.41667	7.50629	7.44153	7.33771	6.41075	6.76315	7.50494	7.19643	6.51775	5.96347
DDX24	-0.158409	6.8426	6.85474	6.34483	6.38785	6.84147	6.94533	5.5552	5.81224	6.51175	6.43829	5.74039	6.79999	6.93511	6.51665	6.55244	7.59418	6.90845	6.81224	6.08087	6.35014	6.1536	7.09445	7.29066	5.05788
NECAP1	0.213069	2.74416	3.22342	3.86493	3.6427	3.50208	4.47314	2.87774	4.60348	3.89821	3.56682	3.6427	4.49249	4.28244	3.74739	4.23496	3.47379	4.13586	4.42694	3.61589	3.71039	5.42492	4.80374	2.90304	2.69822
ARHGAP4	-0.141754	7.11478	7.4685	7.16078	7.05289	0.659925	4.7137	6.507	6.27705	6.41329	7.13412	6.49777	5.2604	6.24298	7.02048	7.26491	6.85337	7.14578	6.69139	5.20085	7.12412	0.62293	6.09212	4.83542	5.41075
DHX32	0.063485	1.54102	3.78241	3.64386	3.27053	3.73877	3.54473	3.37016	2.79909	4.58135	3.70266	3.49313	3.56194	4.52732	2.66221	2.39232	4.30524	1.51096	0.0976108	3.19377	2.81967	3.56316	4.00809	3.26604	4.05572
RCOR1	-0.0340154	4.84046	3.84599	3.69265	4.52857	4.69766	4.39985	2.54102	4.56925	4.04352	4.16993	3.39094	4.7447	4.99503	4.09424	4.34341	4.76235	4.30012	4.8885	4.23879	4.06264	3.15381	5.12887	4.70764	3.33342
GPATCH2L	-0.0862997	4.9486	3.06867	3.31615	4.30743	4.13011	4.68538	1.20163	4.06005	4.67186	3.93734	4.37226	4.26228	4.34056	2.95233	4.05398	4.81558	4.08066	5.04832	3.38543	4.1102	3.75382	4.97131	3.60288	2.29278
LTBP4	0.154357	5.06048	5.58646	5.21762	5.38509	0.275007	6.0691	3.09592	6.01212	4.26303	5.41346	4.28836	5.23955	3.86888	5.26903	5.42358	6.21897	4.32841	7.07842	4.48091	6.63691	7.13607	7.31823	5.2854	3.58496
BLVRB	0.522983	4.91982	5.71562	4.49378	4.94626	2.27501	3.17792	5.27984	8.22728	3.43563	6.02967	5.17273	6.5944	7.31624	6.02015	5.64962	7.39395	5.77584	7.31388	7.29967	7.53768	6.97934	9.58231	7.90773	6.00562
SLC9A1	0.153945	3.58856	2.98003	3.04789	3.59096	2.81762	3.97728	3.07039	4.39163	3.17313	2.63923	3.36317	4.77347	3.32193	2.8339	2.90689	4.20163	3.69711	4.01167	3.90304	2.95977	3.1127	3.84197	2.43563	4.15866
SPTLC1	0.0284675	5.20516	4.37156	4.89288	5.15785	4.95513	5.52669	3.70044	4.99322	5.07468	4.01703	4.95187	5.4663	5.1102	4.70321	5.45549	5.24907	4.7845	5.60466	4.46205	4.87725	5.71149	4.90641	5.20085	4.22728
PAPOLA	-0.0841286	6.46205	5.83061	5.94907	6.07938	6.00338	6.42928	5.49442	6.01458	6.58916	5.54226	5.79207	6.84812	6.12516	5.09128	6.01123	7.17153	6.37972	6.33932	5.7271	5.57894	5.8716	6.35509	6.57274	5.45648
CCNK	0.137607	5.19417	4.31759	4.60881	4.73118	5.21179	5.72574	3.63923	5.36527	5.29462	4.98231	4.65134	5.63836	5.39678	4.88753	4.92458	6.2034	5.45022	5.64472	5.17672	5.02059	5.01703	6.17113	5.8505	3.63227
PCBP4	-0.152978	3.61117	2.92029	2.20477	2.38957	1.07039	3.55582	2	3.30159	3.32912	3.25096	2.40599	1.79909	2.03914	4.05224	1.90689	2.75702	2.774	4.25701	0.918386	3.73985	5.36387	2.14405	2.04614	0.641546
YPEL3	0.389091	3.21412	3.5741	3.04614	0.632268	1.04264	1.66903	4.916	3.91743	0.333424	3.17153	1	3.07039	3.09255	5.8334	4.27575	2.70708	3.852	3.22805	3.47638	3.50843	3.47508	3.89821	3.98003	5.87799
MRPS33	-0.0364545	6.29682	6.40327	6.26472	6.07959	6.77597	5.64674	6.80839	5.81686	5.92006	5.37712	4.87381	5.79753	6.41075	6.73498	6.58256	6.15725	6.85661	7.12825	6.51586	5.71012	6.43212	4.6011	6.81928	6.12784
NDUFB2	-0.142776	7.85131	8.05344	8.15507	7.03903	8.69495	7.83573	7.31234	7.07157	7.80839	6.61941	6.45549	7.7664	7.64918	7.40233	7.34917	8.20011	8.55086	8.54156	7.8622	7.47776	8.19244	6.7654	9.16247	6.47832
NUDC	-0.167095	6.77321	6.87394	6.77096	5.99232	7.49729	7.35905	5.71644	7.48132	6.29352	6.39832	6.16169	7.58376	6.95373	5.96602	6.35544	7.41557	6.96763	6.47265	7.03771	7.0343	7.44402	6.76474	6.99616	5.25285
MAEA	-0.37848	6.03914	5.96185	5.9814	5.42593	6.35913	6.08555	4.23266	5.83188	5.47411	5.94228	5.03518	5.60288	5.87504	5.36142	5.82782	5.8627	6.18745	6.10538	4.81352	5.9479	5.32769	5.69098	4.86888	4.59634
ICAM1	0.416548	0.584963	2.25701	1.5656	1.01436	4.36807	3.37712	0.367371	3.87381	2.22342	1.43829	3.47897	1.63691	3.6893	3.78136	2.38128	5.41684	4.03034	3.0993	4.59276	4.57833	0.275007	5.37816	1.26303	3.49442
STRN4	-0.116566	5.6522	5.66704	5.54102	5.58706	7.02934	5.75462	3.96993	6.95675	5.46989	4.92932	4.38681	6.0798	5.92267	5.61206	5.2032	6.29057	5.75596	6.02636	5.81455	5.55305	5.55612	6.59976	5.33307	4.55459
IRAK3	-0.424833	5.26303	4.09592	4.4363	4.89724	4.64501	4.5373	3.54844	4.01257	5.48123	4.92742	3.71809	4.71699	2.79286	3.65191	5.24869	3.27947	4.43296	4.44228	3.12763	3.48543	0.0703893	4.36036	1.53107	3.58736
LYZ	-0.105417	8.54516	10.5329	9.66466	11.9003	6.12391	2.17632	8.31506	5.50462	6.84562	13.5027	4.55888	5.48736	5.87823	8.20056	13.344	5.97338	7.63771	10.5181	6.59051	8.78221	0.773996	6.92624	4.8525	10.9061
MUL1	0.124369	3.89821	3.63691	3.6792	3.7137	3.6893	3.75382	1.91839	4.21101	3.51602	3.7366	3.40327	4.17313	3.75489	3.6311	4.20633	4.26153	4.12019	4.39985	4.0268	4.14731	5.31976	3.8679	3.05137	3.15381
TFAP4	-0.38	4.45022	4.46532	4.71864	4.29719	4.83946	4.13093	3.07724	4.02503	3.88069	4.02148	3.5656	4.40122	4.72629	4.09001	3.89433	4.47379	4.5601	4.70874	3.79181	4.66448	3.95233	4.6605	3.57046	2.44626
PDCD7	0.114132	4.48414	3.66903	4.13832	4.73444	4.58736	4.78084	3.37434	4.74631	4.59753	4.04701	4.43563	4.82833	4.75007	4.46336	4.26303	4.67807	3.91169	4.47444	4.32409	5.45385	4.12433	5.01614	4.25248	3.93829
SPG21	0.352362	6.17373	4.93263	5.47249	6.19653	5.48575	5.74685	4.78973	6.26266	6.11749	6.65621	5.72683	6.91121	5.68818	5.85	5.87209	6.46499	6.50208	6.58556	5.40837	7.46573	5.67694	5.79701	5.45779	6.71672
DNAJB11	-0.413986	6.77795	5.83415	5.81301	6.29333	6.11998	6.33735	6.05897	5.64414	6.21082	6.40412	5.28392	6.14098	5.83592	4.58256	7.0227	6.75542	6.74564	5.99435	5.43263	4.94673	5.66306	5.70929	5.59604	4.6893
FLT3LG	0.306991	2.31904	2.61824	2.15056	1.75702	1.46467	2.07039	2.3505	3.74308	1.52105	2.55827	3.03738	2.84398	2.56071	2.28392	2.27501	2.43296	3.60407	4.32625	3.0054	2.79909	2.36737	2.57531	1.35614	3.27202
RAB11FIP3	-0.0124129	3.89142	3.53978	1.71809	4.68201	4.48864	2.70929	1.1375	3.77821	2.97085	3.06178	2.9782	3.60407	3.89724	3.23573	4.58376	3.97728	2.6017	4.12516	3.07724	3.0054	4.67129	5.06824	2.42761	2.10098
GNPTG	-0.0723477	5.59096	4.92837	4.73498	4.95233	4.23649	3.72356	5.60377	4.2854	4.03034	5.29389	3.75168	3.53356	4.89966	4.81404	5.59066	4.21723	6.66206	4.70984	3.45943	4.56194	4.45681	5.76739	4.99774	4.5552
ZNF268	-0.306863	3.45418	1.75275	2.01078	2.68706	2.57531	2.52356	1.79077	2.54102	2.55336	2.59216	2.52105	3.4957	2.61824	1.45943	2.65076	1.76977	0.124328	1.5509	2.51349	1.13093	2.50335	2.7137	2.51854	1.70929
GOLGA3	-0.255737	4.6792	3.44626	3.0268	3.31325	4.23189	4.23802	2.37573	4.09845	4.24413	3.70819	2.55336	4.02945	3.90304	3.06005	3.70819	3.01257	3.63575	4.1635	2.852	3.57652	4.01525	5.17911	3.27501	2.15381
PABPC4	-0.506361	9.03326	7.4071	6.8653	7.37191	7.08778	7.18468	7.27268	7.63096	7.34545	6.8125	6.16712	7.95431	7.54373	7.87873	6.53807	7.53823	7.11749	6.54998	7.61787	7.07221	7.33056	6.78607	7.26997	6.19535
CERS4	0.455236	2.82171	0.163499	0.137504	0.0976108	6.02525	4.3512	0.970854	3.57531	3.52105	3.38543	4.56438	3.64386	3.39094	2.05658	1.8679	3.99005	3.76022	5.40224	3.90207	3.38957	3.75382	4.54102	2.24793	4.72083
MCOLN1	-0.0248139	3.06523	4.0268	3.63459	3.45812	3.05137	3.47249	2.43829	3.62176	2.91648	2.82579	2.51349	2.9542	3.28392	3.31034	2.852	3.48156	3.9364	2.98003	2.7137	2.75489	3.59813	5.23036	2.67807	3.35191
USP48	0.0907016	5.45648	5.86617	5.10308	5.70791	5.47832	5.12557	4.75114	6.65091	5.40701	5.94392	4.27352	6.55275	6.54334	3.90111	5.91862	6.68257	5.65878	5.59455	5.76845	6.01659	5.2521	7.28281	5.1297	5.28651
PDPR	0.0677321	3.47119	3.34483	2.87381	4.5008	4.65992	4.03034	2.24793	4.67073	4.67807	3.14568	3.03386	4.83996	4.75542	3.69488	4.09677	4.37851	3.77189	4.68089	4.24413	3.41414	3.853	4.39849	3.42761	2.66448
AARS1	-0.262377	7.0917	6.11437	7.19446	6.4143	6.92896	7.10203	6.66959	8.11359	5.99027	6.29994	6.83479	7.43596	7.77314	7.50565	7.15137	6.09022	5.34341	7.52184	7.01603	6.84248	7.84931	7.55444	6.51001	3.19219
GLG1	-0.0543781	5.57561	3.91743	4.23419	5.06091	5.11977	4.8212	2.90881	3.65764	5.20006	5.07296	3.89433	4.53232	5.13134	4.67525	5.33199	5.15785	3.74416	6.16491	3.81455	5.27798	6.23266	5.47897	3.0197	3.60051
KIF4A	-0.0494909	4.66505	3.33199	3.86592	4.21023	4.8166	4.48156	2.33342	4.21257	3.84499	3.42492	3.17473	4.81044	4.36527	3.36177	3.91265	4.75328	3.85	4.59455	4.25172	5.08619	5.58676	4.71039	4.74039	1.98914
TNRC6A	0.0277081	3.9991	2.7761	3.27352	3.62994	3.98914	2.72901	2.76553	3.82883	2.86196	3.62994	3.19692	4.26379	4.19298	2.98185	3.8846	4.34127	3.51728	4.26228	3.45418	3.93829	4.51791	4.9644	3.02326	1.926
PLEKHG2	-0.185508	4.69711	4.01078	4.22959	4.89288	2.22959	2.37295	3.69042	4.50716	4.10098	3.45154	2.40327	4.07639	3.1635	4.99684	4.29205	3.93168	1.7866	4.38543	2.854	2.72247	4.62352	4.38128	4.59096	2.75061
NAT14	-0.123339	4.10769	5.30524	4.97865	4.38819	3.32193	4.91121	5.11645	5.26866	4.12928	3.92125	3.44758	4.4019	4.17393	4.06867	5.36107	5.37816	1.64155	5.32769	4.37434	1.91456	5.83162	4.54967	5.03562	3.97545
EXOC1	-0.206314	4.5008	3.87676	3.9364	4.61589	3.89045	6.36387	3.7126	3.61117	5.09424	3.87873	3.82069	4.21723	4.24717	3.41414	4.32409	3.98459	3.82985	4.5509	3.48929	3.9514	5.01926	4.45746	3.57289	3.65535
RBM27	-0.132842	3.65421	2.9782	3.18745	3.65878	3.6427	4.25096	2.32769	3.45022	3.95884	3.09424	3.47768	4.23113	3.88264	2.58976	3.40327	4.34767	3.11103	3.73335	3.51349	2.95791	3.6017	3.19061	3.45681	2.5008
OSBPL8	0.0115416	4.63169	3.26003	4.36597	4.86592	4.72738	4.03034	2.64847	5.85798	4.77136	4.18269	4.42828	6.13545	4.85549	3.32769	3.87774	4.59455	3.65306	5.46303	4.15785	4.0027	4.52419	5.24982	3.81455	3.86888
DTX2	-0.464935	3.18428	4.41616	4.19613	4.22033	4.6427	2.89142	4.10685	2.65535	3.24793	5.18903	3.27202	2.80116	3.50843	2.90304	3.87676	2.80941	3.49185	3.87774	2.53854	3.42223	2.90497	3.24184	2.89142	2.36457
PUS7	-0.339273	4.01792	3.86493	3.95327	3.79077	5.20281	4.78084	2.4957	3.96255	4.53169	2.26303	2.36177	4.70487	4.20477	3.48027	3.40871	4.7021	3.94392	4.44758	3.30305	3.86493	3.80632	3.1127	3.87971	1.42761
DLD	-0.0230871	6.27538	5.60674	6.23093	5.95187	7.03287	7.27221	4.25475	5.78503	6.05137	5.09677	4.88509	6.85723	6.97602	5.17871	5.91648	6.8775	5.94181	7.3249	6.55551	6.76713	6.78581	6.71328	5.89336	4.76607
WDR7	0.284029	2.13422	1.76553	2.17951	2.74846	2.3505	2.29278	1.58015	2.85997	2.35896	2.88753	1.43829	3.14893	2.42761	1.58976	3.12102	2.32193	2.71809	3.0635	2.30159	2.95606	2.23266	3.48156	1.93734	2.49313
TXNL1	0.0431193	5.88655	5.79494	5.65878	6.08236	5.851	6.19594	6.4348	6.45335	5.86443	5.59574	4.60288	7.04243	6.13566	6.16007	6.5157	6.61471	6.03892	5.88972	5.35156	6.02392	5.67271	6.30415	6.3651	5.57319
CMTM6	0.212736	5.51759	4.34908	5.12474	5.75034	5.26941	5.39197	4.86493	4.488	5.66732	5.43663	6.18824	5.58856	5.12598	4.8166	5.55551	5.01212	5.8268	6.53962	6.11936	5.21684	4.82426	5.04701	4.54844	5.83794
ITGA6	0.426942	1.28688	0.344828	0.739848	1.01436	2.53854	4.17233	0.176323	0.565597	3.15866	1.37851	2.69377	1.97453	3.07553	1.45943	1.1635	1.20163	3.58736	4.06781	0.687061	5.6401	7.09054	1.61824	1.69599	4.29278
MAP3K20	-0.268519	3.94673	4.39025	3.99186	4.80787	4.0268	4.38474	3.42626	4.31252	3.93829	3.94673	3.55459	5.35403	2.97269	2.774	4.26978	4.34056	0.344828	0.15056	4.1152	3.15704	6.06566	5.0197	2.82375	2.73769
FH	-0.505313	7.10967	6.37678	6.48945	7.36833	6.93369	7.15977	6.28281	6.0492	6.4187	6.2891	5.1815	6.56102	6.76713	5.94883	6.28411	6.7845	6.03584	6.64082	5.92695	7.49346	6.63241	6.49153	5.65678	4.36317
SEL1L3	-0.271085	5.32841	2.9542	5.12681	5.48832	1.59932	0.432959	2.8339	4.13258	0.344828	5.68201	3.0321	3.78346	1.25096	4.18903	6.43313	3.5472	0.333424	0.378512	2.27798	3.88069	0.250962	3.70819	1.54102	2.84398
CDV3	0.0806999	6.32301	6.08513	6.23917	6.2447	6.68776	6.60288	5.07553	7.10769	6.91193	6.58436	6.51728	7.55359	6.72451	5.86567	6.31669	6.79857	7.32742	6.79675	6.53854	6.18765	6.62132	6.63604	5.8711	5.9028
ALKBH5	0.0576606	4.35544	5.63575	4.85699	4.98231	5.73254	4.29205	4.3067	4.2854	4.24336	4.75382	4.76765	4.49889	4.88118	5.58316	4.53419	5.38681	5.01346	5.42962	4.78503	5.35403	4.87234	5.2555	4.80426	4.42962
NLRP1	0.23493	0.799087	2.71809	0.903038	3.66221	1.18269	0.111031	1.09761	2.73552	0.400538	4.2817	0.933573	1.62293	1.93357	5.3107	2.58015	6.3025	0.594549	3.28983	1.91073	1.20163	3.8885	4.80787	0.0143553	1.94486
SPAG7	0.392607	4.96717	6.1373	5.92908	6.2681	5.24451	5.37921	5.9982	6.27761	5.0751	6.26679	5.06996	5.74443	6.55811	6.43045	5.34731	5.96209	5.05961	5.92434	6.18289	5.86171	6.36387	6.44741	6.38905	6.62746
ORC6	-0.320275	5.71946	5.03518	5.15015	5.79286	6.11666	5.70044	4.95047	5.08364	5.6893	5.33807	4.97499	5.97338	5.44559	4.52356	5.83415	5.53699	5.68004	6.19377	4.72955	5.40565	5.23189	5.52136	5.61618	3.36597
ZC3HC1	0.0173296	4.65878	4.23036	4.23189	3.88362	5.13175	3.56194	4.08321	4.19456	4.15543	2.65076	3.00899	4.82883	4.45154	4.31687	4.36036	4.9331	4.4957	5.21101	4.60999	4.24031	4.29793	3.80426	5.49057	3.61353
TMEM101	0.00294327	5.07039	5.13791	4.94205	5.13955	4.2211	4.7148	3.71918	4.98959	4.7339	4.83643	4.45418	4.90497	5.09592	5.56773	5.37712	4.0072	5.3427	4.67186	5.34127	4.94298	5.46499	4.57228	4.51475	4.67807
PSME1	0.0815188	7.34314	7.55444	7.29848	6.96116	7.66519	7.92914	7.11176	7.15816	7.19554	7.60652	7.65535	7.60622	7.4048	7.4042	7.72185	7.44493	7.68039	8.12407	7.87676	7.27678	6.71328	8.42072	7.18725	7.04407
PPP2R3C	-0.164881	5.5741	5.30524	5.41447	5.88166	4.78764	5.01346	5.35896	5.12391	5.01123	4.78346	4.88411	5.34092	5.47606	4.91313	5.60348	5.16631	5.46009	5.88704	5.2555	4.9279	4.60229	5.20945	5.13011	5.31723
HAUS4	-0.113432	6.08958	6.63517	6.14832	7.19308	5.19495	5.29719	4.47703	5.41109	6.47573	6.31306	6.42173	5.54009	6.22323	6.69725	6.08321	4.81198	5.71287	6.68762	5.69265	6.2502	5.24451	5.33128	4.80581	6.43079
CEBPE	-0.178174	2.9222	1.9222	3.61235	4.46532	6.02259	4.86096	2.95791	0.0565835	5.31723	4.45681	4.52857	0.0565835	0	0.378512	3.31904	0.485427	5.63372	4.68313	0.0143553	3.9855	0	0.124328	0.137504	4.94907
OSGEP	0.00185863	5.8525	5.97957	5.60644	5.92932	5.49538	5.29939	5.77241	5.21529	6.10014	5.96139	5.50589	4.93593	6.14812	5.17033	6.02658	5.36807	6.23074	6.48365	5.40803	5.5435	4.08576	5.70404	6.06953	6.22072
RNF31	-0.328965	5.55459	5.06221	4.58676	4.93168	4.7845	4.62469	4.94064	4.88509	4.57592	4.57652	4.16591	4.50526	4.9514	4.75862	4.86344	4.60348	5.38232	5.49921	3.93168	4.27873	4.16591	4.9222	5.31216	4.35755
SCFD1	0.1483	4.56133	4.13832	4.53667	4.45878	4.74201	4.67412	5.19061	4.46923	4.90063	4.66221	4.61176	5.02015	4.81352	3.78136	4.89045	4.67751	4.7366	5.31723	4.37365	4.28983	4.92125	5.14119	5.59544	4.1152
G2E3	-0.0395508	3.73985	2.42761	3.04963	3.3147	2.774	3.74846	2.16027	3.04963	3.62293	2.82782	2.93357	4.21257	3.51728	2.37295	3.12928	4.40599	2.72465	3.57289	3.11103	3.04439	3.39232	3.98003	3.66334	1.82375
HECTD1	-0.0402149	5.7137	4.86493	5.24831	5.56773	5.57471	5.61559	4.22574	5.88289	5.77531	5.70432	5.25096	6.32175	5.93993	4.32409	5.83314	6.0691	5.21412	5.47508	5.36772	5.38336	5.33235	6.58195	5.48993	4.31832
HNRNPC	0.0887181	9.64095	9.53759	9.6529	9.54357	9.71872	9.92095	9.22901	9.44232	9.44632	9.29066	9.82505	9.9116	9.86022	9.8399	9.15505	10.1317	9.5472	9.52415	10.2608	9.67025	9.67292	9.93867	10.066	9.14303
SUPT16H	-0.0984208	7.01145	6.83693	6.62147	6.65664	7.12794	7.17842	5.79364	6.75047	6.58796	6.49538	6.38076	7.38353	7.16551	6.08343	6.56879	7.95222	6.95443	6.83251	6.7703	6.72914	6.32894	7.10873	7.00293	6.10014
TOX4	0.0180788	4.87283	4.35966	4.46532	4.75756	5.00899	4.61058	3.31325	4.4957	4.32265	4.3427	4.41819	4.63052	5.21529	4.73173	4.50779	5.39094	5.26679	5.35896	4.18507	4.33557	5.00764	5.0072	4.57289	3.75489
GEMIN2	0.175597	4.26379	3.93168	4.37643	3.90881	4.53169	4.72901	3.23573	4.55949	4.2426	3.70708	4.49185	5.23534	4.52732	3.51854	4.06695	4.53107	4.50462	4.84398	4.49953	4.81916	4.0993	4.97315	5.75141	3.58135
TINF2	-0.0854531	4.83137	4.91791	4.59216	5.09128	4.16269	4.23802	3.97177	4.70653	4.17313	4.76288	4.74308	4.60881	4.83592	4.9542	4.85	4.66164	4.90977	5.61794	4.05224	3.97085	4.62936	4.7252	4.57531	4.19298
TRPM7	-0.11089	4.5601	3.0635	3.82477	4.39232	4.07553	4.70708	3.01792	4.17552	4.83996	3.35332	4.15462	5.00899	4.774	2.99277	4.24336	4.29499	3.90785	4.65076	3.46467	5.03606	3.48929	4.2765	3.05658	3.18903
TYRO3	0.197111	3.42358	1.49057	1.41143	1.62293	1.8679	2.08066	1.7137	2.89142	0.879706	2.3505	2.1375	3.80632	3.11103	1.22033	2.86196	2.57289	4.45088	4.88947	2.63227	4.91265	3.47768	3.38957	0.83996	1.58496
WDR76	-0.0102067	4.1235	3.69042	3.73877	4.33557	4.21101	4.18666	2.48543	4.56864	3.03738	3.88264	4.35685	5.2426	4.26529	3.08236	4.18587	3.29866	4.22265	4.52231	4.47703	4.58256	3.73985	4.42156	2.86394	3.57894
CAPN3	-0.349996	4.38612	3.49825	4.95791	4.79338	2.1635	2.27798	4.02148	1.18903	3.14405	6.10978	2.36177	1.14405	1.0635	2.87578	5.30779	1.42223	5.1914	3.52732	0.505891	3.07382	0.83996	1.11103	0.823749	3.12928
SNAP23	0.307751	5.64875	5.35403	5.91337	5.7412	5.32912	5.64068	5.12846	7.3875	5.30634	5.59395	5.72383	7.20955	6.54427	4.69432	5.29131	5.99141	5.77347	6.21335	6.31089	6.37051	5.45187	6.71617	5.95861	6.68664
PHGDH	-0.258706	7.18706	6.23113	8.13853	7.27314	6.93003	7.77215	7.40173	8.73552	6.32912	4.81711	7.97791	7.57939	0.604071	8.12081	7.29747	5.20789	1.83996	9.13883	7.32166	8.39964	8.38651	6.63706	3.11603	4.26828
COL9A3	-0.31481	3.92315	3.94579	3.69711	3.64501	2.36177	1.93734	3.19061	0.298658	2.08406	4.28096	2.95233	0.286881	0.111031	1.02857	2.60881	2.89336	0.475085	4.7021	2.39506	4.63227	0.321928	3.68818	0.344828	2.37016
EZR	-0.267841	6.95035	5.16148	6.38457	5.7046	6.85499	4.61117	5.15947	4.97039	5.42223	5.90521	4.36177	5.78999	6.38802	6.54767	6.05311	6.77281	6.49346	6.21043	5.62147	6.09803	6.97476	5.80064	4.60585	3.26754
MYL6	0.0694186	11.098	9.70122	9.93808	9.42463	9.5046	9.29439	9.18683	9.3163	9.56129	9.87623	9.89898	9.40312	9.53302	10.1292	10.2833	9.28905	9.902	10.4948	10.6699	9.2774	9.64061	10.4406	10.4528	10.2382
AGO1	0.0778671	3.0054	2.1177	2.05311	3.20006	2.86592	3.08406	1.20789	3.99277	3.57046	3.37295	1.83996	4.13504	2.97453	2.54102	2.72465	2.90304	3.32912	2.98914	3.03562	2.66903	3.02148	3.57531	2.40599	2.22033
CLSPN	-0.365355	4.30305	3.16189	3.35896	3.95791	3.904	4.08491	2.13093	4.03738	3.97728	3.50335	2.72465	5.09592	3.6241	1.98914	3.40599	3.96717	3.57289	4.01257	3.6565	2.47508	3.12102	3.54473	2.47768	2.07724
RFFL	0.195425	3.17792	2.45154	2.38405	3.4489	3.36317	1.75275	2.41954	4.49121	2.70487	3.54102	2.86987	3.96809	3.6565	2.60644	3.31904	2.62059	4.65992	5.09128	2.96532	3.24793	3.65421	2.93546	2.33342	2.9782
UNC13D	0.00307984	4.7241	5.94064	4.92458	5.79727	5.41481	5.58316	5.44328	7.85773	5.82349	4.21412	4.57592	7.44568	7.05333	6.38905	5.45746	7.11312	6.33789	6.05115	6.31904	5.54844	0.214125	7.59403	2.73552	5.55857
MFSD11	0.0369334	3.8166	2.90881	3.24031	4.49442	3.33771	4.23343	2.58496	3.83491	3.80323	4.33199	2.854	3.90207	4.03562	4.14731	3.92979	3.51475	4.57773	3.75061	3.53107	3.44095	3.64847	4.50843	2.79286	3.04614
DPYSL2	-0.0278511	3.6565	5.09887	4.30889	4.75596	1.57046	3.6565	3.69153	2.28983	0.454176	2.15381	3.40054	3.58256	2.57531	4.6017	4.01257	2.03562	5.09043	5.29572	2.54844	4.84549	4.62176	2.71809	2.09761	4.17313
GPATCH2	-0.296241	3.41549	2.05658	2.04963	3.43962	2.31034	2.11437	1.80323	2.13422	2.63459	2.08066	2.58976	2.71149	2.77821	2.13422	2.62761	1.72247	2.07724	3.18428	2.43296	2.62761	2.76341	2.42492	2	1.47508
NUP50	-0.197165	5.8999	4.91552	5.30012	5.58436	5.55121	5.64818	4.40122	5.2114	5.71122	5.38128	4.98368	5.7412	5.38474	4.69432	5.60674	5.70127	5.93239	6.27221	5.08066	4.02503	5.50398	5.8301	4.7241	4.51665
CDC45	-0.479491	5.92505	5.65449	5.98596	5.7252	6.13134	6.40599	5.12226	5.98914	5.60733	5.52042	5.15987	5.85823	5.68846	5.20867	5.75702	5.35966	6.31705	6.1416	5.37712	5.31179	4.43563	5.96602	4.9905	4.35685
COMT	-0.508277	8.76457	7.99447	7.94702	7.54303	7.63938	7.73884	7.15462	7.91049	7.15886	7.42828	6.58691	6.79103	7.21772	8.0536	8.30392	6.25795	7.42333	8.13124	7.47913	6.75862	7.07585	6.20867	5.88557	7.5691
ADA2	-0.172694	3.09424	2.61117	2.43296	5.00495	1.45943	2.98732	3.51096	0	4.88801	5.85	1.82375	0	0.189034	4.39232	5.32948	0.163499	3.07211	1.67807	0.790772	5.60615	0.0285692	0.0143553	0	3.08576
ECHDC1	-0.309265	6.39883	5.52857	6.61102	6.34305	5.89845	6.11915	5.88264	5.69738	5.70625	5.52732	5.76686	6.61736	5.76713	4.63052	6.18745	6.16591	6.33396	6.00383	5.72574	6.14323	5.74147	5.67271	6.40786	5.13914
LRRFIP2	0.413371	4.3505	3.59335	4.1127	4.55949	3.57652	4.54226	4.38888	4.58796	3.54597	3.79181	4.40531	5.07553	5.59962	3.98641	4.25248	4.50462	5.28059	4.80735	5.30122	4.27128	5	4.67694	3.65878	5.18349
SEC22C	0.265093	4.337	3.66448	3.51475	4.44294	4.13093	4.85699	2.96901	4.39163	4.21645	3.41954	4.36317	5.0268	4.91169	3.9991	4.54102	4.23189	4.82426	5.36422	4.3799	5.1981	5.31179	5.83971	3.72356	3.49697
HDAC6	0.144955	5.36492	5.03694	4.55827	5.07852	5.19377	5.27128	4.29499	5.36457	5.10852	5.46205	4.32625	5.13791	5.26153	4.46467	5.30159	5.24869	4.99865	5.55182	5.51728	5.86641	4.55213	6.10161	6.40582	4.56682
CDC6	-0.273143	5.98868	5.06005	5.36737	4.86888	5.97865	5.99027	3.84699	5.41346	5.35966	5.38543	4.57289	6.36929	5.47573	4.19613	5.47865	5.79312	5.65134	5.66221	5.76792	4.77452	4.72083	5.84674	4.852	3.86196
UPRT	0.295445	3.53232	2.90304	2.69377	3.37156	3.03386	3.64386	2.77189	3.03562	3.18903	3.39369	3.14405	3.46074	3.35614	2.63459	3.20633	2.9542	3.88753	3.9991	3.70819	4.12598	3.70377	3.96347	3.32337	3.14241
CDC23	-0.18745	4.96301	4.33199	4.55275	4.32697	4.904	5.39129	3.22805	4.72137	5.15704	4.43962	4.7252	5.49089	4.80478	4.26903	4.62702	4.80787	4.6865	4.86691	4.7126	4.64386	4.89966	4.34696	4.96671	3.13422
AAAS	-0.118501	5.47768	5.43696	5.68454	5.65478	5.91552	6.08428	4.83086	6.33718	5.15015	5.65935	5.20203	6.33718	5.89821	5.38094	5.55213	6.34536	5.50653	6.0063	6.031	5.40224	5.75168	6.11353	5.32409	4.38474
CBX5	-0.171203	5.83794	4.59276	3.93546	4.58856	5.22226	4.99774	2.9279	5.3565	4.10434	5.01033	4.81967	5.71699	4.90881	4.0009	5.54813	5.05398	3.63807	5.07382	4.04614	4.81044	4.85699	5.52857	4.25399	3.82171
SUCO	0.258814	3.83491	2.23879	2.73769	3.98094	3.21412	3.42626	2.33628	3.55827	4.52105	3.71809	2.98732	3.99639	3.26003	2.60407	3.6565	3.43829	4.36387	4.23113	3.75275	3.60526	3.81044	4.16912	2.37016	3.85599
MSH2	0.0592773	5.00764	4.31325	4.73985	3.70487	5.80658	5.45976	3.05832	5.393	5.17313	4.29425	4.52105	6.33771	5.42559	3.30597	4.8535	5.68622	5.14078	5.23036	5.19456	5.04264	4.46074	5.36702	5.32697	4.0018
MAP3K1	-0.24804	4.31832	3.58015	3.22651	3.27202	3.82883	4.13422	3.25399	2.31904	4.50526	3.81044	3.33342	2.80323	3.17153	4.21878	3.70819	3.23573	3.45549	4.20711	2.7845	2.854	1.29278	2.71809	2.91456	3.94673
DHPS	-0.129827	6.69808	6.86802	6.75849	6.84348	6.25172	6.45352	5.80813	6.48043	6.03848	6.21607	6.86158	6.35085	6.57198	6.71342	6.33342	7.3267	6.3918	7.1057	6.47005	6.81634	6.47865	6.67483	7.32859	5.40054
HOOK2	-0.207849	4.65535	5.82043	4.70155	4.62469	2.79077	4.03914	3.51728	4.13011	4.19535	5.07211	4.03386	3.60051	4.19849	4.26228	5.10224	5.41346	4.78241	5.48543	3.10769	5.16027	4.03474	5.45516	3.23266	2.82579
ARCN1	-0.0173189	6.91241	5.85699	5.34234	5.76713	6.19022	6.35014	5.11395	7.14027	5.64731	5.6011	5.79831	7.43012	5.82018	5.97613	6.05507	6.48236	5.67101	6.75662	6.6476	5.51286	7.36203	5.89215	5.972	5.61589
TMEM38B	-0.108135	4.10769	2.6017	3.87676	3.53107	3.16832	3.72137	1.91839	3.11936	3.95977	4.87971	3.90785	3.59216	2.84398	3.14405	4.55643	3.45022	3.37434	5.1643	3.39232	4.19613	2.86987	1.99639	2.93734	2.56071
PSMD5	-0.131545	3.62994	4.03122	4.01436	4.29499	3.97085	4.45352	3.6792	4.05224	4.45022	4.0045	4.17073	4.69711	3.24031	2.84197	3.73227	4.774	4.1102	4.62117	4.2032	4.11437	4.50653	4.43162	4.20867	2.35896
PTGS1	0.291019	4.25399	3.06695	2.43029	4.06523	1.848	5.59365	2.35332	6.27929	4.78188	4.83086	3.79286	6.09529	6.36317	3.91265	3.83491	4.56499	3.27352	5.13052	5.87922	5.02989	0.0703893	5.36982	4.08406	6.26285
NUP188	-0.248866	5.34518	4.55643	5.03122	5	5.33557	5.52857	3.62994	4.90497	5.54288	4.40463	4.05572	5.22458	5.17113	4.46989	5.04439	5.35191	5.16631	5.39849	5.07211	4.96901	4.73227	5.55059	4.05658	3.55213
CRAT	0.227158	3.90497	3.58976	2.73335	0.15056	3.774	2.39232	2.48543	3.32769	3.72356	3.82273	2.68032	2.78241	3.97453	4.08406	3.96993	3.59096	4.40259	3.92125	2.28688	4.63865	5.38785	4.43829	2.61589	3.07211
SH2D3C	0.00771413	2.53356	3.1375	2.59455	4.55827	3.31615	0.773996	3.27501	3.93452	0.782409	3.9279	3.49697	2.79909	1.97085	1.43296	4.56986	1.36737	2.29572	3.30889	3.37156	2.29572	0.176323	4.39094	0.903038	4.68201
NANS	-0.18172	6.33985	6.3844	5.97522	5.15906	6.21354	6.30012	5.30342	5.58316	5.97108	5.79442	5.14853	5.55766	5.61117	5.15704	5.71039	6.43012	6.57319	6.488	5.66846	5.92719	7.20653	4.93876	6.27575	5.20945
CWF19L1	0.145677	3.27053	3.95047	4.14405	3.87774	4.69988	4.57107	3.30305	3.42358	4.62644	4.30012	4.27053	4.39369	4.34483	3.42626	3.44095	4.46401	4.47054	4.29646	4.19849	4.29278	3.69822	4.23189	4.31397	3.59932
BTAF1	-0.191085	4.27053	4.04527	4.65076	4.74201	4.36107	4.67356	2.07382	4.65076	5.55551	4.78869	4.92979	4.50335	5.18031	3.29719	4.30086	5.3844	4.77294	4.89239	2.94111	3.9279	4.28983	4.77452	4.20789	2.04963
IKZF5	0.116287	2.41954	3.08746	3.58135	3.38957	3.81558	4.10434	2.26903	3.66789	4.20398	2.926	3.51096	4.32697	3.89918	2.33342	2.58736	4.12928	3.00899	3.75489	3.68032	3.24336	2.76553	4.06437	3.05137	3.19692
WAC	0.121664	5.57319	5.47573	5.48156	6.3336	5.488	6.1819	4.55949	6.75782	6.5818	5.69098	5.07682	7.00349	6.19712	5.75061	5.89942	6.58451	5.84775	6.73796	5.47314	5.37365	5.14486	6.39386	4.99277	5.93687
CREM	0.37828	2.58736	3.12763	3.76553	2.58256	3.16027	4.28244	2.03562	3.95047	4.11187	2.87578	2.86987	3.98185	3.88753	2.74846	3.08236	4.8846	3.22342	3.94392	3.45681	3.92029	6.07617	3.73985	4.15056	3.70929
NUBP2	-0.238704	5.72492	6.27352	5.9279	5.43863	5.72765	5.1819	4.85848	5.48575	4.9528	5.65678	4.91504	5.1127	5.87676	5.63052	5.87848	5.73145	6.14751	5.88093	4.90497	5.52888	5.8125	6.28244	5.37816	4.58015
SMIM24	0.482887	0.85599	1.60881	0.782409	0.389567	2.41684	5.59395	0.641546	6.39729	4.05658	2.28392	6.49265	6.54998	5.31361	0.356144	3.92979	3.83086	5.40599	4.41414	5.77083	5.03694	0.189034	5.48575	0.189034	8.54009
HIVEP1	0.419343	0.505891	1.70487	2.62994	1.80323	2.66448	0.565597	1.7866	1.92979	1.22033	2.07382	2.28983	2.06695	2.07039	2.03562	2.88166	2.62293	2.65076	2.90881	2.36737	1.64616	2.55827	2.77821	1.35614	1.88362
FKBP5	0.0292641	5.37434	4.42156	5.68818	4.86344	6.34749	5.82043	3.33199	5.81173	5.38198	4.44758	5.19022	6.44012	5.48123	2.07039	5.29902	5.8505	5.22419	5.86419	5.32048	8.22738	4.24869	6.58976	4.17632	5.02857
SRPK1	0.0239146	5.83061	4.32337	5.47379	5.68958	6.30779	5.62088	3.64616	5.63459	5.55704	4.78031	5.04527	6.51869	5.56621	3.70155	5.04832	6.45418	5.83289	5.6094	5.17153	7.80478	5.84423	5.57592	5.35579	4.46467
BRPF3	-0.0679878	4.34483	2.11437	3.10601	3.68145	3.53232	3.51854	2.14405	3.48543	3.61235	3.43829	2.10098	3.65421	3.65992	3.19692	3.58256	4.18507	4.01346	4.50843	2.59694	3.69599	3.00899	3.61706	3.12433	2.27501
MRPS18A	-0.152719	5.88972	5.37295	5.94017	5.79103	5.34731	4.61883	5.29939	5.69766	4.28392	5.36527	4.86839	5.56194	5.68257	5.58406	4.88947	5.80529	5.88679	5.14323	5.55735	6.18051	5.11811	5.48478	5.89821	4.80168
TMEM14A	0.0381923	4.96255	1.94111	3.88753	4.63459	3.53978	4.88264	3.70044	4.60644	3.89045	4.21257	3.28688	5.11437	3.80426	3.87578	3.60288	3.55827	5.7498	5.63604	2.86196	5.01614	4.77294	4.04527	4.18269	2.99639
EFHC1	-0.129231	3.31759	1.97085	3.25248	4.80323	3.16027	1.96717	3.15704	2.33628	2.30159	3.42358	2.47249	2.4489	3.40599	2.56071	2.51349	2.28096	3.37573	2.80941	1.09085	3.51096	3.89627	2.62761	2.49825	2.95233
HSP90AB1	-0.132126	10.3941	9.3677	10.1565	10.5478	10.6261	10.5567	8.32067	10.4426	10.4049	9.57939	8.99373	10.9568	10.2113	9.44172	9.25001	11.499	10.1513	9.13579	10.4333	10.993	10.4221	9.91103	9.98228	8.7895
CDC5L	-0.00738247	4.61883	3.48543	4.31976	4.70764	4.43229	4.02857	3.09761	4.55152	4.0054	3.37851	3.69042	5.29425	4.19061	3.74308	3.79077	4.71754	4.13011	4.06264	4.03738	4.45878	4.10434	4.51033	4.48091	3.93168
ZNF184	0.289637	2.21412	2.29866	3.01614	3.64386	2.95791	3.24793	2.58976	2.64386	3.85798	2.36177	2.65992	3.42358	2.66448	1.99639	2.91648	2.79077	4.08151	3.5373	3.52482	1.98185	2.36457	3.44758	2.85599	3.774
SIRT1	0.282454	2.69599	3.36317	3.36877	3.77821	3.64731	3.35896	2.72683	3.13258	4.13914	2.97453	3.29719	3.89724	4.02059	3.02503	4.41075	4.26828	2.66676	3.75702	3.63923	3.05485	3.8268	3.58496	2.97636	3.70598
HNRNPH3	0.273103	7.32418	7.39558	7.24194	7.23573	8.75345	8.42425	6.4888	8.22173	7.97757	7.61714	7.74268	8.32665	8.08773	6.58451	7.80503	8.5306	8.79756	7.86505	8.25809	7.57471	8.40905	8.54032	8.33186	7.36641
IFT74	-0.143545	3.83693	2.69377	3.35473	3.7126	4.4489	3.94298	3.69711	3.08236	2.852	0.0285692	3.69933	3.79494	3.81044	2.16672	3.77926	3.07724	2.94486	4.27128	2.58736	3.70487	4.44228	0.124328	3.75596	3.1127
JAK2	-0.0122256	3.22342	1.98914	2.35614	3.60288	2.39232	2.67807	1.69599	5.70099	2.21101	2.32481	1.81147	6.15056	3.12267	0.970854	3.10601	2.96717	2.22651	3.38128	2.36457	1.96347	2.47249	5.69766	1.61353	2.31325
ABL1	-0.00138653	4.32553	4.13175	4.01167	4.52042	4.28762	4.78346	3.05658	4.38474	4.58976	3.71809	3.9855	4.51096	5.18031	4.53605	3.99186	4.32697	4.69098	4.9241	3.64501	4.26903	5.55459	5.14731	3.22805	3.43696
ACOT7	0.0398208	5.29205	5.63981	4.96993	3.76129	5.84574	6.27705	3.24489	6.18388	5.58015	5.23955	4.32625	6.55136	5.90929	4.24869	4.05137	6.22978	5.56163	4.03914	5.84398	6.03078	6.75889	6.36964	5.33271	4.48091
SH3GLB1	0.283434	5.00585	3.849	3.58376	4.89821	4.14323	4.75382	3.2555	5.2891	4.70708	4.47314	4.3512	6.13914	4.9364	4.1152	4.38198	5.65707	4.95791	5.43663	4.18587	4.66619	5.37678	5.33521	4.82069	4.41886
CDC7	-0.201527	4.84449	3.9991	3.98459	4.56682	4.37643	4.34199	2.87971	4.61058	4.41549	3.84298	3.97545	5.27314	4.15218	2.13093	4.73931	3.98823	5.1807	4.9982	3.64155	4.24869	3.43429	4.39575	4.13914	3.21878
SCD	0.300511	5.40531	6.70266	7.42735	6.35861	7.43154	7.52896	5.30743	6.25342	7.28753	6.66633	5.65335	6.91337	6.95292	5.58556	7.42492	8.19111	6.99356	8.33096	7.47646	8.83504	7.55972	7.73931	6.7761	6.20301
TMED1	0.342453	4.82426	4.79753	5.2426	4.53419	4.59156	4.47832	3.60644	5.06307	4.57168	4.51538	4.58736	4.93782	4.84248	4.9472	5.09677	5.32841	4.80219	5.57198	5.11228	5.46271	5.69125	5.6153	6.96255	4.46074
ERMP1	-0.0632559	4.7137	3.75061	3.57168	4.30743	3.62877	3.97728	2.22342	5.99299	3.05311	3.09255	3.61235	6.34908	4.37016	2.46989	5.17552	4.06695	3.54597	4.5292	2.56803	4.0798	2.79286	5.31615	1.15704	4.62877
RAB18	0.11164	4.76129	6.15866	5.55674	5.38991	4.17313	5.9241	4.60229	5.06996	5.64126	4.852	3.99277	5.69516	5.04658	5.36072	5.46238	4.95931	5.87627	5.81916	4.55827	4.70708	5.67384	6.00495	5.58526	5.55582
WASHC2A	0.136667	3.23419	3.81762	3.71918	4.43763	5.06566	4.30597	3.11603	3.20789	4.92077	3.71039	3.15866	3.94298	4.28466	4.35896	5.07596	3.91839	5.01748	4.12598	3.74631	3.93357	3.96625	4.85748	2.92029	3.7301
MAST3	-0.028772	2.64386	3.18903	2.44095	2.98003	1.926	2.41414	1.86394	1.85997	1.774	1.99639	3.0036	2.12433	1.90689	3.28983	2.57046	2.02503	3.27798	3.60407	1.25701	3.01792	2.06695	3.04439	1.88362	2.45681
MZF1	-0.3408	3.83491	4.80271	4.71534	4.18824	3.67807	4.10769	3.07724	5.34376	4.54164	4.12598	2.34483	4.35403	4.83643	3.57773	4.70155	4.18903	4.16189	4.91886	1.89918	4.28688	3.19849	4.71039	2.63923	2.08406
OCEL1	0.203225	3.21101	5.03254	3.76235	3.8339	2.38128	2.79909	4.01167	4.05398	3.40871	4.2555	3.80735	3.50843	4.0268	4.07382	4.10769	4.6241	3.69265	4.28096	2.82375	4.39712	4.27352	3.1127	4.14975	4.31252
MYO9B	0.093804	6.07296	5.90521	5.84147	5.79207	6.13504	6.38198	4.61648	6.22978	5.98755	5.65249	5.86245	5.9528	5.48575	5.93946	5.98254	6.36212	6.92552	6.85873	4.91934	6.54551	6.43546	6.21257	4.57894	6.35191
KCNK6	0.199555	3.38681	3.48671	3.64847	3.50589	0.201634	3.72247	2.92979	5.58105	2.28688	2.79701	1.82375	4.8334	3.48414	2.59694	2.08746	7.41464	3.3147	4.35755	3.50462	4.04789	1.10434	4.90207	5.35014	4.1416
PSMD8	0.163804	7.22497	7.37998	7.81928	6.53947	6.96394	7.26482	6.42408	7.97149	6.77584	7.03122	6.64097	7.91247	7.5562	7.16027	6.90605	10.2894	7.29893	7.9607	7.52317	7.93805	8.27277	8.20105	8.40918	6.13668
FBXL19	-0.0801433	4.43696	4.904	4.17473	4.31687	4.49442	3.34908	2.93734	4.21956	3.64155	4.0798	3.08066	4.337	4.58075	4.74362	4.2149	4.86344	5.26416	4.55704	3.89724	4.59753	3.99005	5.0148	3.33485	3.42895
SETD1A	-0.160892	4.16912	3.6837	3.4957	3.76341	4.38198	3.50716	2.97453	3.89239	2.98732	3.5656	2.64616	3.80219	4.18428	4.16269	3.62176	4.15299	4.08491	3.91456	3.36036	3.52356	3.24489	4.9644	3.14078	2.82171
BCL7C	0.092089	4.63865	5.34447	4.06953	4.41886	4.88899	4.05137	5.40803	3.774	4.12681	4.99413	4.47119	3.89724	4.62	4.91361	4.69822	5.03826	6.21548	5.04701	4.49185	4.96486	5.78136	4.91265	4.75168	4.04963
CIRBP	0.228545	7.83302	8.4607	8.36859	7.66974	7.07371	7.12464	7.90929	8.29292	8.08332	8.2791	10.7351	6.88387	8.59813	8.42601	7.4822	7.58165	7.93245	8.49741	10.2008	7.63452	7.99061	7.85194	8.86895	8.79133
ATP5F1D	-0.164467	6.48236	7.70418	7.04089	6.6744	6.08449	5.61088	8.82021	6.44576	5.8622	6.31506	6.85425	5.94907	6.63285	6.85736	6.60955	7.19071	6.83061	7.32445	5.99684	6.48365	6.77716	4.60763	6.42442	6.87578
HNRNPM	-0.17813	8.57743	8.44365	8.54454	7.57387	9.14193	8.83788	5.26078	8.38448	8.32782	8.04243	7.33619	8.64357	8.70946	7.58736	8.17098	8.85228	8.72301	8.21776	8.13684	7.832	7.9191	9.03362	7.0398	7.21859
MARCHF2	0.240103	3.89724	3.08576	2.63459	3.12267	3.47638	2.76341	2.27501	4.63052	2.67807	3.07724	2.95977	3.62761	3.30159	2.28688	3.31325	2.96347	2.91648	4.31904	3.55827	3.26153	4.93734	4.7148	2.76765	4.37086
NDUFB7	-0.132728	7.53115	8.34647	8.14756	6.8627	7.43204	7.85667	7.74241	8.15659	6.84524	7.52435	8.01162	7.83327	7.30606	6.9364	7.4127	7.01881	8.2134	8.03579	7.86808	7.32939	7.93387	7.32157	8.84558	6.98425
TECR	-0.253961	7.58871	7.51578	7.33851	6.70805	7.16812	7.53302	7.11197	6.89081	6.23151	7.10758	6.78477	7.23621	6.60229	7.03331	7.3733	6.14792	6.87307	7.0917	7.1636	7.15896	7.10664	6.56727	8.49121	6.61383
TIMM13	-0.257364	5.95954	7.05983	6.59126	6.47427	6.62234	5.28651	6.19101	5.88387	6.23955	5.35861	5.73579	5.94977	6.60348	5.95233	6.67835	6.38612	7.16551	6.43179	6.24869	6.22304	5.14568	4.63981	6.40548	5.48414
CDC34	0.237654	4.96486	5.86864	5.1819	4.73173	5.04133	4.15137	4.68538	5.35226	5.3565	4.98322	5.42492	5.03782	5.5008	5.38163	5.22033	5.63052	5.42559	5.43796	5.41075	5.69711	5.96116	4.57046	5.93617	5.01703
MTAP	0.246585	0.0840643	4.36527	3.37156	4.52293	0.214125	4.24641	2.91073	0.176323	2.87578	0.163499	4.41549	0.0976108	5.14282	3.904	5.1635	5.05441	4.94673	5.69683	0	4.47444	5.91409	0.163499	4.42223	3.03914
POLR2E	-0.131114	7.64616	8.19604	7.75716	6.58376	7.27249	6.63633	6.28188	7.5489	6.9486	7.73132	6.51806	7.62564	7.81404	7.26162	7.61383	7.86833	7.58241	7.80206	7.92053	7.732	7.61537	7.19613	7.37947	6.30469
POLRMT	-0.0541716	5.16832	5.52136	5.35826	4.33128	5.17991	4.14731	5.72601	5.43363	4.87086	4.85649	5.6094	5.0648	5.24755	4.43896	4.40327	5.56194	5.40361	5.80684	5.30415	5.4663	5.5008	4.49633	5.9279	4.40531
RASSF7	-0.205801	4.21257	4.15137	4.18428	3.42626	3.44095	1.83592	3.58616	2.28688	2.14078	4.09339	2.80116	2.67356	3.76129	3.35332	3.49185	3.75382	4.84549	5.02104	1.37851	4.07211	2.1375	4.18824	2.20163	2.76765
GADD45B	-0.141894	4.89288	4.21101	4.35755	4.42358	4.49633	2.59932	4.39849	2.52607	4.03914	5.44261	4.36387	1.57046	2.85997	4.82273	5.23113	2.55336	5.80658	5.85275	1.35614	5.71315	5.9542	1.76553	2.17951	3.65191
PALM	0.385337	2.66221	1.01436	0.321928	0.0565835	3.12267	2.63923	0.0285692	0.344828	4.97269	3.78555	0.298658	0.15056	5.14323	1.90304	2.02857	2.97453	2.46205	3.93263	1.90304	2.82375	3.57531	4.57471	1.93734	4.38267
MKNK2	0.0536787	5.49985	5.68566	5.11811	5.0751	5.01078	4.87873	3.85499	5.86245	5.86071	5.04614	6.52482	5.04571	5.77004	6.478	5.26866	5.93428	5.58676	5.59574	4.71425	5.67016	5.65277	5.5735	4.89288	4.70432
TRMT2A	-0.646785	6.6327	6.33967	6.04045	5.73091	5.27501	5.42156	5.43896	6.15441	5.47606	5.85947	4.9486	4.98094	6.14445	5.51602	5.86196	5.98596	5.78162	5.65392	4.75862	5.38128	4.62527	5.55582	5.06953	4.52042
RANBP1	-0.419783	8.39515	8.45779	7.98817	7.37121	8.83949	8.65793	6.82031	8.37977	7.89348	7.79292	7.25927	8.05382	7.98328	7.24793	7.70867	8.68036	8.12459	7.97206	8.12045	7.43804	7.74645	7.89312	7.82934	6.79883
ZDHHC8	-0.561518	4.851	4.84699	4.66562	4.52607	4.72028	5.05615	3.35614	4.37504	4.87283	4.65019	3.70044	3.46858	4.50589	3.83794	4.73769	4.72629	4.14649	4.09508	3.51349	4.12267	4.35685	4.854	3.35755	2.6893
KLHL22	-0.124871	4.04177	3.5435	1.5656	3.74739	3.21723	3.95606	1.07039	3.13422	3.77716	3.56925	2.43296	2.65992	3.09255	2.72465	3.07895	2.63923	3.21257	3.58736	2.55582	2.90304	3.96809	3.29278	2.34767	3.09085
MED15	-0.335047	6.02857	5.19298	4.97499	5.60851	4.95327	5.6565	5.07211	5.75862	4.90737	5.37469	4.28021	5.0045	5.22149	5.50621	5.56499	4.72028	5.87627	5.47411	5.04308	5.1152	4.73931	5.61206	3.97911	4.91504
SNAP29	0.309111	4.24336	3.68032	3.3147	3.94111	4.22651	3.55704	4.83491	4.51412	3.14241	4.15462	3.60644	3.87086	4.46923	3.5008	3.93923	4.0009	4.92742	4.7252	4.20006	3.68482	3.69265	4.08916	4.71315	4.9331
CRKL	-0.120372	5.23688	4.4121	4.38957	4.46532	4.79753	5.80941	3.57773	5.13668	5.20828	4.56377	4.59634	5.20398	4.93404	5.09466	4.78973	4.72192	4.88606	5.09212	4.93074	4.64559	4.17393	5.26903	4.1819	4.08236
LZTR1	-0.469972	4.84197	4.79181	4.09001	4.48736	4.08661	3.76235	3.24945	4.68426	4.08831	4.19456	3.33485	4.07895	4.09508	4.0009	3.7666	3.97177	4.46532	5.08789	2.62994	3.92029	4.59276	4.19456	3.33342	2.72901
SMARCB1	-0.00367524	6.33628	6.35191	6.27761	5.99932	6.74389	6.50303	5.32589	6.64414	6.43912	6.67553	5.74039	6.62571	6.97785	6.24907	5.75489	5.85574	6.27202	6.81967	6.81031	5.90905	6.41988	6.71617	6.51554	5.99458
DERL3	-0.266592	3.9279	3.63691	3.87283	2.96901	2.27202	3.06178	3.22805	0.650765	2.68482	3.22805	1.40054	0.695994	2.57289	2.28688	4.52795	1.32769	3.05137	4.7939	3.23113	3.56682	0.400538	1.72247	2.82375	2.45154
BCL2L13	-0.0918053	5.13791	4.61294	4.84248	4.99186	4.19928	4.13011	5.09424	5.14608	4.44228	4.85947	4.5097	4.61824	5.05572	5.20984	5.44095	4.06867	4.337	5.65907	4.78921	4.51538	5.25399	4.5552	4.30961	4.44626
DDTL	-0.413888	2.43829	2.94673	2.30159	2.07382	2.1177	2.33628	1.72247	2.34199	2.17632	2.50843	1.65992	2.23879	2.58256	1.926	3.02857	1.66903	3.06695	2.49313	1.95233	2.1635	1.34483	2.38128	1.16993	1
DDT	-0.253572	7.36859	8.10826	7.50247	7.30469	6.90087	7.41608	6.33842	7.22313	5.88435	7.38672	5.98413	7.50978	7.09455	7.4138	7.96953	6.67737	7.85187	7.45549	6.27612	7.47743	7.0954	6.97968	5.50144	7.02192
CABIN1	-0.213616	5.06781	4.80168	4.46989	5.03518	5.8296	5.51412	4.40803	5.65935	4.51096	4.43095	4.10014	5.06695	4.81916	4.08236	4.77768	4.04876	5.37782	5.93168	4.29205	4.80839	4.36387	6.04199	3.43696	4.42694
TBC1D10A	0.370991	2.39506	2.7866	1.73118	2.26903	2.12763	3.51475	1.1375	2.12763	2.55336	3.16672	1.75275	1.91456	3.85997	2.50335	2.67356	3.8125	3.64731	3.05658	2.64616	3.23266	3.51475	4.33842	2.31904	2.76977
SF3A1	0.00935178	5.90785	5.16993	5.25058	5.52419	5.94743	6.20945	3.10434	6.28873	5.66021	5.68285	4.84449	5.92386	6.12495	5.92624	5.31976	6.19948	5.12681	6.031	6.13381	5.66334	6.28577	6.52669	4.57652	4.66448
GGT5	0.222236	0.163499	3.23726	2.82985	0.0565835	3.20789	3.774	0.214125	3.5373	0.713696	0.475085	1.80323	1.73118	1.52105	0.0285692	0.250962	4.1643	4.04614	2.18269	2.51602	1.25701	5.89336	2.76341	0	4.84449
RNF215	0.356261	2.57531	2.47768	1.02148	1.81147	1.70044	2.04614	1.48027	3.01792	1.97453	2.63691	1.93734	2.65076	2.19535	2.33628	1.70044	3.13258	1.91839	3.03738	2.69377	2.41143	4.40395	4.20711	3.35473	2.1375
SPECC1L	-0.0993827	3.82375	3.41684	3.59694	3.59813	4.37851	4.21101	2.16672	4.07895	4.31034	3.45418	3.05658	4.23496	4.62644	3.06867	3.96347	3.76977	3.64731	4.68145	3.52105	3.27501	3.88264	4.31759	2.52356	3
PPIL2	-0.260021	5.17193	5.08576	4.9397	5.1811	4.56682	4.56071	4.53978	4.75969	4.46858	5.02503	4.29572	4.2032	5.05441	4.2032	5.09339	4.7845	5.83441	5.58976	4.04264	4.18666	4.16027	5.35614	4.92172	3.98732
SNRPD3	-0.0675319	7.43546	6.31814	5.8212	6.19061	7.72199	7.64335	5.00405	7.11884	6.58721	7.17413	6.15036	5.71205	7.36807	6.25531	6.48575	7.74322	7.39703	7.47557	6.63052	6.87713	6.16169	7.22574	6.98698	5.49601
PES1	-0.27032	6.4358	6.43079	6.31161	5.92053	6.79429	6.75876	5.28466	6.39592	6.22052	5.90785	5.6314	6.11749	6.69585	6.17013	5.49474	6.80193	6.54566	6.11353	6.69042	5.97522	6.2817	6.57833	6.38319	4.96578
MAPK1	-0.0677268	5.21257	4.62585	4.61117	5.20594	4.83137	5.27687	3.74846	4.84248	5.07895	4.58856	4.26078	5.3107	5.06393	4.66619	4.94017	4.73715	5.30378	5.68846	4.66903	4.49121	5.16471	5.16068	3.94017	4.59932
GGT1	-0.128459	6.31452	5.4522	1.95606	6.19594	4.62	1.76977	4.99639	1.28096	0.739848	5.06091	4.83086	0.356144	4.41143	6.01458	5.75007	5.07253	2.21412	4.70598	4.53667	5.54597	0.516015	5.28096	2.32193	3.96717
PPM1F	0.203095	4.13175	3.67356	3.25399	3.72028	4.16189	4.96116	2.02503	5.74551	4.24793	4.28244	3.86295	5.36877	4.18428	3.51979	3.66789	4.68706	4.41819	5.92742	4.16269	4.04439	4.40939	4.76394	2.7866	4.60763
TOP3B	-0.215897	4.66676	4.34341	4.18745	4.02148	4.74362	5.10224	3.33056	4.80529	4.64212	4.50398	3.46205	4.37921	4.35332	4.24184	4.31904	4.51159	4.53045	5.01748	3.80839	4.52168	3.61824	5.70099	3.74416	3.16832
CYTH4	-0.305768	5.65564	4.72247	5.49761	5.74927	1.95606	0.526069	4.38267	2.41954	1.22651	4.51602	5.35509	2.22651	0.970854	4.26978	4.96578	1.41684	5.13134	5.99526	2.36457	2.73552	0.422233	1.28688	1.12433	4.07125
ESS2	-0.389884	4.02059	3.853	3.72901	3.97269	3.72356	3.59335	3.46336	3.83086	3.30451	3.44493	3.12928	3.19377	3.75596	3.37295	3.54226	3.15218	4.16511	3.9364	3.5435	3.33914	3.48027	3.81147	3.9364	3.17153
MFNG	-0.0666645	5.916	7.04592	6.92493	6.84612	0.333424	7.71438	5.00495	7.75308	6.84046	6.61897	6.35579	7.78849	6.61486	6.96324	6.52826	7.02281	6.82833	7.25663	7.30086	7.57826	0.137504	7.99288	0.454176	5.58856
LRP5L	0.0788174	1.8679	2.71809	3.08406	2.9782	3.01614	2.56316	2.95977	3.12928	2.51096	3.5656	1.26903	2.488	4.11437	1.81558	3.92505	2.98914	3.77294	3.17951	1.83188	3.19219	1.85997	2.93357	2.17313	2.82171
SLC25A1	-0.327803	6.82706	6.59051	5.42257	5.38716	5.43095	6.69056	4.93546	4.56925	6.15482	6.44178	3.87873	4.47444	4.57592	6.00315	6.64111	5.1375	6.42307	6.47622	3.9542	5.70377	5.81352	5.55857	4.88606	4.94158
GRK3	-0.108993	3.05311	1.94486	2.20789	3.57652	1.86394	3.04963	1.75275	2.88753	3.81558	3.19377	1.98914	3.34341	3.02326	1.926	3.42895	0.333424	3.01614	4.3147	1.7866	2.6893	1.54597	1.7137	2.21412	2.39506
GGA1	0.0337599	5.14731	5.22651	4.89482	5.20203	5.76315	5.80323	4.32697	6.21199	5.02547	5.84222	4.71149	5.08151	6.59828	5.04352	5.83441	5.54844	5.79701	5.62	4.9814	5.91839	5.40871	6.99118	4.98823	4.02591
HIRA	-0.252104	4.98003	4.61235	4.63285	4.38543	5.31542	5.23764	2.9279	4.86344	4.52857	4.41954	3.93168	4.62234	5.36352	4.23343	4.60881	5.02724	4.81198	4.95884	4.24108	4.48091	3.83996	5.16511	3.42492	3.84398
SH3BP1	0.0979081	4.93121	4.92695	4.20945	4.63169	5.31615	5.12019	4.47444	5.6241	5.16229	5.66789	5.73633	4.57592	4.1811	5.36212	4.34483	4.4957	6.52199	5.80219	5.1152	4.62059	3.09255	4.49953	4.6565	5.81634
LGALS1	-0.105613	11.2018	11.2161	11.5936	9.86847	10.3286	6.71301	10.4031	7.85312	3.34483	10.5081	11.2327	6.97223	10.612	11.1524	11.0129	10.0203	9.28568	10.2093	7.35658	10.3259	12.2157	9.73429	6.89385	10.6513
HPS4	0.0283211	4.94579	4.30305	4.1235	6.51207	3.92029	4.4822	3.57168	4.58376	4.56864	4.49633	4.16672	4.75168	5.49793	3.88753	4.88166	4.21801	4.79909	4.9782	4.9991	5.89797	4.07639	6.11645	4.40735	3.9241
SRRD	-0.0128419	4.31542	3.29425	3.4019	4.32409	3.88166	2.7845	2.67129	3.89433	3.3799	3.11936	2.91456	4.61117	4.76713	2.86394	3.49953	4.39025	3.8268	3.56803	4.20555	2.774	3.36597	4.1819	4.49249	3.14241
PATZ1	-0.248833	4.96209	4.76607	4.03298	4.71918	4.55459	4.92932	4.48736	4.07553	5.06393	4.33271	3.90207	4.45286	4.8339	4.50208	4.49953	4.27575	4.97591	4.49057	4.69599	2.35896	3.54226	4.77716	3.8166	4.65421
TRIOBP	-0.13623	4.42089	3.8885	3.61117	4.42089	4.10685	3.64501	2.58736	3.80735	3.24184	4.05918	3.26153	3.10098	3.74201	4.58015	4.21023	3.1811	4.36597	5.16229	2.80735	3.69265	5.20672	3.8268	2.65992	3.22651
TFIP11	0.0322463	4.60526	4.20006	4.32048	4.34056	4.87873	4.89142	4.44692	4.27426	4.1416	4.0072	3.81044	4.46467	5.22843	4.08576	4.22574	4.44162	4.93404	4.82171	4.66164	3.91648	3.93263	5.3875	5.0648	4.13258
GCAT	0.0487662	3.24031	4.58135	4.32912	1.77821	4.64155	5.00988	4.07895	3.75702	4.74792	4.39232	2.94486	3.82477	5.13463	3.76871	2.43029	4.60763	4.79181	3.1811	4.34837	4.70377	4.3978	4.78398	3.47508	3.70044
ANKRD54	-0.271058	4.69377	4.41414	3.90111	3.76235	4.37434	4.0781	4.05485	3.57046	4.01436	3.83289	3.30012	3.26454	4.43162	4.22188	4.14893	4.36247	4.0063	4.34127	3.853	3.7137	4.43029	4.29425	4.22188	3.58135
EIF3L	-0.00239924	8.24646	8.39785	8.35698	9.14926	8.0881	8.40101	9.25489	8.53947	9.14323	8.46793	9.07345	8.28378	8.94084	8.79133	8.539	7.79967	7.62022	8.42026	9.21483	8.38866	7.86474	7.41752	8.30177	9.18378
SNU13	-0.0353168	7.00101	7.35324	7.15987	6.65507	7.84756	7.68951	7.84706	7.29223	7.09413	6.97625	6.89494	7.36405	7.52795	6.92089	6.98709	7.46156	7.85381	7.268	7.76553	6.9888	7.21014	7.2503	7.60207	6.77452
MICALL1	-0.0765035	3.31179	3.29866	2.94111	3.22651	2.55582	2.48027	2.39232	2.63227	3.16993	3.31759	2.24793	2.774	3.39369	2.68706	3.17153	3.64731	3.40327	3.91456	2.58256	2.61117	3.51854	2.81352	1.25701	3.16027
POLR2F	-0.114105	6.94111	6.40565	6.626	5.61559	7.80316	7.75322	6.58961	6.46401	6.55735	5.77004	5.74174	6.17453	6.91097	6.15745	6.41244	6.90063	7.2114	6.38042	7.32634	6.6585	6.82031	6.87873	7.82902	5.45022
CCDC134	-0.299263	3.17792	2.23573	2.09424	3.10769	2.71149	3.50589	0.695994	2.08066	2.44626	2.58496	2.29866	2.47249	2.65992	1.8679	2.84398	2.78869	2.44361	3.04264	2.27798	2.6017	1.91073	2.97085	1.32769	1.1177
DEPDC5	-0.339037	3.44095	3.49185	3.40599	5.29902	3.04963	3.27053	3.35755	2.58736	3.35332	3.17153	2.25096	2.06005	3.44095	2.95977	4.12928	2.82985	3.31325	3.07382	3.01614	2.75702	2.43563	3.23879	2.44095	3.1375
PICK1	0.201876	3.24031	2.39506	2.75916	2.72901	1.07039	3.03914	2.01792	3.16511	2.41954	3.97636	3.23573	2.42761	3.1177	1.64155	2.97453	2.61353	3.66789	3.77294	3.44095	2.14078	3.96901	3.98459	1.66448	3.33485
CENPM	-0.48014	5.81916	6.3651	5.7703	5.66021	5.79103	6.09402	5.69988	5.40293	5.34305	5.88655	4.43696	5.71534	5.59335	5.23993	5.6837	5.43929	6.59126	5.74308	5.52325	5.53543	4.71809	5.48317	4.69432	4.91886
DDX17	-0.233012	7.7492	6.90713	7.23974	7.40905	6.95303	7.66669	6.16088	7.23458	8.15487	7.53815	7.56377	7.44195	7.75962	6.71658	7.88441	7.51357	7.74153	7.80999	6.50271	6.96821	6.88313	8.08821	6.18408	5.81967
TCF20	-0.0462574	4.18269	3.57773	3.53854	4.0635	4.06695	4.10601	2.13093	4.0365	4.32984	3.9241	3.28392	4.08661	4.24869	3.34483	4.08066	4.29572	4.3875	4.94439	3.87873	3.95977	3.774	4.64443	3.03738	2.81558
HSCB	0.376561	3.01614	4.14405	3.2555	4.28614	3.37156	2.99458	3.80941	4.0027	3.27501	3.87086	4.01346	3.82579	3.49442	4.30743	3.24793	4.66107	3.06867	3.27352	4.06264	3.39917	4.51475	3.70598	4.23189	4.52732
CBY1	0.255933	3.94298	3.08576	2.90881	2.52607	3.38957	3.96717	3.24184	2.7866	3.29425	3.62644	4.13175	2.60644	4.24489	3.12433	3.5097	3.07382	3.30889	3.59932	2.91648	3.91361	5.43563	4.13504	4.09085	3.65191
TOMM22	-0.138132	5.95163	6.06587	5.8748	5.6879	6.21684	6.26997	4.75809	5.46793	5.97728	5.76129	5.30816	5.87995	6.07938	5.48188	5.6565	6.41752	6.07103	5.51349	6.4933	5.26529	5.38094	5.4957	6.2937	5.50526
XBP1	0.118579	6.60288	7.39086	8.33936	6.21645	6.84009	6.66064	6.1035	6.63154	7.3996	6.02259	7.40412	6.45992	7.01981	7.05474	7.36317	7.13965	7.51735	8.32589	7.13443	6.21451	6.08343	6.68692	5.68482	8.52572
RTCB	-0.0250771	6.17672	5.70515	6.17393	6.05745	6.00966	6.45204	3.54844	5.9507	5.91648	6.07532	5.34625	6.18765	6.55413	5.66903	5.71617	6.26134	5.98846	6.04854	6.34163	6.17732	6.35473	6.44626	5.44559	5.22651
JOSD1	0.281075	4.03914	3.76235	4.07468	4.2426	4.41616	4.66107	2.76977	4.7021	4.49506	4.13093	4.44758	4.76022	4.90063	4.36527	4.37086	4.5656	4.55827	4.93357	4.87381	4.22882	5.43263	5.36982	3.35473	3.94017
FBXO7	0.454294	5.70183	5.73145	5.61589	5.93946	5.9404	6.0798	4.6792	6.2363	5.59216	5.74766	5.46434	6.42895	7.37912	6.44012	5.77505	6.77584	6.0376	6.28225	6.64789	5.63198	5.4138	7.96075	6.7498	6.66007
GTPBP1	0.116173	4.76235	3.59813	3.86394	3.99367	4.77821	5.01167	2.4957	5.53045	4.58075	4.28466	3.67356	5.10811	5.05832	4.04177	4.50779	5.25512	4.41414	5.28873	5.24184	4.32481	4.29205	6.16007	3.61235	3.5741
POLDIP3	-0.155808	6.07211	5.52763	5.37504	5.78293	5.80581	5.88289	3.98368	5.49281	5.60851	5.83971	4.93263	5.86121	5.8334	5.78293	5.71617	5.67892	5.45615	6.03474	5.75569	5.64731	5.27389	6.34038	4.57531	4.89239
TIMP3	0.173781	4.68986	0.389567	0.137504	0.163499	0.731183	0.495695	0.0285692	6.14608	0.526069	3.09255	0.641546	6.53947	5.05918	9.1213	0.201634	6.90388	0.871844	0.0565835	6.84222	0.124328	0.678072	4.90159	6.33807	0.432959
PPP6R2	-0.351409	5.56834	5.33378	5.06953	4.34127	4.75969	4.95327	4.15543	4.74578	5.20281	5.11145	4.19928	4.31615	5.23266	4.8679	5.41954	4.89142	5.53387	4.98504	4.32193	4.62644	4.62994	5.46761	4.19928	4.04264
SBF1	-0.19778	4.61941	4.86245	4.23343	4.38681	5.25814	4.51223	3.73877	4.21956	4.43763	4.85	3.93452	3.94017	4.59036	4.93074	4.52607	3.83895	5.01926	4.69655	3.59335	4.71809	4.43095	5.33307	4.27947	3.65878
SUN2	-0.223536	6.91731	6.29737	5.80993	7.14405	5.54504	5.70127	3.57773	4.96717	5.84248	6.36422	5.14119	4.63052	5.4591	6.61427	6.81109	5.10811	6.57243	6.44526	4.65878	6.27352	5.55551	6.36019	3.40327	5.60348
CYB5R3	0.126702	6.2384	5.39746	5.05094	4.97039	5.61353	6.42761	3.90014	5.95954	5.33485	6.2765	4.82273	5.83517	6.083	5.78529	5.84197	5.69683	6.06242	5.50875	5.92029	5.12102	6.16088	7.14456	4.72901	5.77347
DNAL4	0.254666	3.14078	3.35614	3.21878	3.39917	3.22959	2.63459	2.33056	2.63691	2.74846	3.40871	3.8125	2.28096	3.68706	3.68032	3.42895	3.02148	3.46728	3.65992	4.12184	3.04439	3.926	4.06867	2.8679	3.20633
LMF2	-0.256735	5.36737	4.68201	4.35896	4.55459	4.46009	4.91073	3.84197	4.09592	4.57046	4.57773	3.80839	3.59694	4.86839	4.35755	4.88313	4.48607	4.95093	5.33199	3.33914	4.71918	5.18943	5.1631	4.16591	3.48671
RHBDD3	-0.22475	5.34731	4.46793	4.56255	4.45483	5.0036	5.39232	3.27352	4.99729	4.81711	4.76341	3.8166	4.8953	5.16471	4	4.36807	5.5656	4.9855	5.69933	3.83592	4.36247	4.32193	5.89724	3.46205	3.51979
PACSIN2	-0.176967	5.95	5.19259	4.84699	5.31107	5.29278	5.40088	4.04002	5.47281	4.50144	5.76527	4.69655	5.47086	5.88118	5.61648	5.74578	5.40701	4.8485	5.92742	5.43363	4.38128	4.7252	6.04876	4.35403	4.42425
TTLL1	-0.147681	3.32337	2.73552	2.488	2.61353	2.49825	3.74416	2.76553	2.0321	2.94486	3.45286	2.81762	1.86394	2.73985	2.66448	3.68594	1.65076	1.97453	3.19535	3.13586	2.78241	3.05137	2.62293	2.07724	2.82985
AP1B1	0.189138	5.47768	4.7126	4.99141	4.92505	5.31216	5.40701	4.02945	6.62979	5.0505	5.2854	4.02503	5.2891	5.67073	4.33842	5.0691	5.72738	5.26379	5.85075	6.37782	4.92884	4.79546	6.27277	5.1815	5.63894
HMGXB4	-0.0902694	4.31034	3.55827	3.89239	4.53667	4.10182	4.46401	2.57046	4.21801	4.37573	4.02945	4.15785	4.75382	4.54535	3.99729	4.24184	4.2149	3.80735	4.43563	4.48929	3.98914	4.24565	4.7301	3.04614	3.0072
TOM1	0.292653	4.05918	3.9542	4.36247	4.62761	4.30305	3.65878	3.1177	3.56438	3.90014	4.10852	3.86096	3.11103	4.45418	4.56925	5.10769	3.49825	5.37226	4.92172	3.82883	4.77663	4.48414	5.01346	3.35473	4.96486
CHKB	-0.384138	6.01413	5.5043	4.68313	5.76792	4.5435	3.904	5.49281	4.78293	4.37921	5.40497	4.7252	4.40327	4.87774	4.81609	5.59753	4.53792	5.17592	5.92979	3.24945	4.19928	3.86592	5.36457	4.25323	4.43229
BIK	-0.347406	4.59634	4.1235	4.87381	2.95047	4.20477	3.94953	3.47119	0.0426443	3.52857	4.60229	2.56071	0.0840643	3.56438	0.286881	4.8953	3.06523	0.731183	4.58736	1.848	3.1177	0	2.27798	1.53605	4.21568
MCAT	-0.47274	4.54535	5.0917	4.75542	4.49442	4.89239	4.26754	3.33485	3.33199	3.58496	4.23573	2.29572	3.12598	4.37086	3.30305	4.53232	4.67299	4.11353	4.09001	2.76977	2.72465	4.07382	3.73877	3.43829	3.69265
THOC5	0.131491	4.59753	4.26153	4.52732	4.71425	4.60288	4.63749	4.31397	5.26341	4.5601	4.34127	3.95327	4.97499	5.43162	4.51602	4.25248	4.80993	4.74201	4.87086	5.24451	4.37712	5.24184	5.09001	4.80993	4.10601
MCM5	-0.231231	6.65406	6.55964	6.71877	6.18051	6.75956	6.47395	5.99752	7.03848	6.08023	6.79935	5.85674	6.77887	6.76527	6.23573	6.644	5.75328	6.91421	7.25899	6.61706	6.25814	4.78973	6.98539	5.92576	5.91648
ARSA	-0.413661	4.68201	4.19613	3.60999	4.81404	2.17632	2.33914	3.64386	1.91073	2.30159	4.33056	2.30743	1.84398	2.66903	3.16672	4.7761	3.01792	2.08746	4.53792	1.4957	2.98003	3.19849	2.63459	2.26903	2.38405
TSPO	-0.54713	8.35927	8.55547	8.17223	8.14221	7.08279	8.04434	7.56285	6.85611	7.84178	8.26997	6.38146	6.84071	7.30652	7.49849	8.25479	6.824	8.90965	8.29274	5.82248	7.06221	7.93858	7.59328	6.54272	0.286881
TTLL12	-0.324566	5.81788	5.85325	5.6014	5.21529	6.29278	5.81019	3.56925	5.27612	5.84975	5.41819	4.09339	5.29646	6.20594	5.39369	5.29646	6.29389	5.21101	5.70708	5.01926	4.43962	4.93404	6.40616	4.2555	4.04614
RPL3	-0.00107947	11.1066	11.6587	11.8233	12.2854	11.2546	11.2923	11.7411	11.5772	12.1244	11.4895	12.4897	10.9924	12.1006	12.2446	11.3881	11.1219	10.4073	10.8878	12.1715	11.6463	11.2316	10.5143	11.3743	12.2867
ZMAT5	-0.0276188	4.0036	4.21101	3.80323	4.06091	3.81147	3.86987	5.29315	5.60051	3.24184	3.53854	3.91839	5.93286	4.42223	4.58256	4.14323	2.9855	4.47508	4.86592	4.91552	4.10936	4.0993	3.9542	3.99277	3.38957
RBFOX2	0.0817399	3.32625	0.847997	0.765535	2.73335	2.51854	0.356144	1.59455	3.81558	3.96347	1.99277	0.475085	4.57471	0.298658	2.70487	1.82375	3.95606	2.80529	3.22959	2.04614	2.80735	6.11853	2.40871	2.62527	0.298658
SYNGR1	0.011535	4.95233	4.81506	4.45286	6.07724	1.67356	5.33056	3.82782	1.50589	6.36317	6.36177	3.18745	1.3505	0.910733	1.73985	6.31759	4.93168	6.11562	5.11353	4.24031	4.07895	4.21257	5.10182	4.26228	5.46989
TAB1	-0.284488	4.63401	4.34837	4.28318	5.67948	3.91934	3.40463	4.03122	3.34767	4.02148	4.33842	3.33771	3.32625	4.36737	4.10601	4.91982	3.80012	4.10182	5.01346	3.9486	3.98094	3.74093	4.55397	3.14405	3.5741
ASCC2	-0.254957	6.0387	5.13627	5.0917	5.17712	5.35826	5.44062	5.34767	5.70543	5.06264	5.54319	4.7301	5.33128	6.07125	5.11811	5.14037	4.99141	5.74846	5.916	5.44725	4.85599	4.86493	6.2878	4.85898	4.55029
MTMR3	0.1648	4.02503	2.84398	2.67582	4.03738	3.18587	3.09085	2.41414	3.9855	3.49313	3.88166	2.852	4.15137	4.22188	3.97911	3.50716	3.30597	4.24489	4.17473	3.39643	3.19219	3.18587	5.06221	2.59932	3.38267
MIEF1	-0.1484	5.0387	4.33056	4.32553	4.31252	4.55029	5.27612	2.51349	4.07724	4.91504	4.66903	4.3147	4.26903	4.95373	4.04002	4.66846	5.3726	4.33628	5.43129	4.92647	4.70543	4.13175	4.85649	3.73335	3.07039
APOL1	0.155915	3.50208	0.545968	0.594549	1.79077	0.773996	1.1635	0.505891	1.74416	0.238787	2.70487	1.81558	3.0321	5.97865	1.11103	2.68482	3.28836	2.81147	2.7761	1.97085	0.367371	0.411426	5.98117	0.298658	1.74416
MYH9	-0.191217	7.7019	6.35949	6.76673	7.00574	7.3036	6.74792	5.24108	6.94837	6.77795	6.67327	5.44626	6.95815	7.99469	7.30351	6.92172	6.2182	7.16017	7.59656	6.41024	6.73998	7.24726	7.20828	5.10014	6.0197
SAMM50	-0.0845032	5.31976	5.73606	5.69738	5.43829	5.86493	5.82655	3.54102	5.48929	5.59753	5.97062	5.16631	5.75275	5.89942	5.12681	5.48736	5.972	5.4957	5.73145	5.9535	4.75007	5.22497	5.90376	5.32697	4.75862
TXN2	0.123249	6.82388	6.87369	6.66619	6.70598	6.52873	6.75542	5.99005	7.31524	5.87799	7.09708	6.34412	6.93369	8.02962	7.07553	6.89263	7.03694	6.95198	6.68047	7.21868	6.37869	6.21101	7.20163	6.91862	6.7137
FOXRED2	0.0256793	3.80012	3.52231	2.6893	3.3799	3.91839	4.05137	1.80323	3.40599	3.70044	3.24945	2.64386	3.42895	4.6241	3.18428	3.71809	5.14282	3.70266	4.18982	3.81147	3.87971	2.83592	3.75489	3.70266	2.37295
EIF3D	-0.0458479	8.26899	7.77558	8.16481	8.30861	7.78803	8.02608	7.67129	8.31705	8.15634	7.68944	8.5041	7.82235	8.92636	8.66949	7.62271	7.63959	7.91666	7.88935	8.61235	8.09233	8.16058	7.53364	7.69453	8.06183
TNRC6B	0.00413298	2.22651	1.7137	1.70929	2.51602	1.63691	2.4489	0.992768	1.95233	2.59455	2.27501	1.29278	2.47249	2.62527	1.65535	2.31615	2.74631	2.03914	2.56316	1.87971	1.73552	1.57531	2.96532	1.58976	1.44361
SGSM3	-0.473779	5.93852	5.57622	5.4266	5.41143	4.80941	5.00944	4.1811	4.77083	4.65249	5.71287	4.75489	4.49313	5.19535	5.36912	5.44526	4.97361	5.29646	5.61412	3.8885	5.1152	4.94953	5.13914	4.39849	4.04089
IFT27	0.254832	3.94298	4.08916	3.16189	3.488	2.12102	3.25248	3.63575	3.5656	3.43162	4.01703	4.09592	3.0993	4.63401	3.4019	3.85997	3.74416	4.5292	5.42626	3.14405	4.20242	4.66789	4.04352	4.12516	3.42492
KIAA0930	-0.365223	8.45541	7.74967	7.01948	8.55888	6.0365	4.93593	5.93852	1.25701	4.97911	8.46923	5.8071	1.62761	3.67356	8.16017	8.15881	4.29499	7.35315	7.34607	3.46074	5.62205	4.05137	3.65764	3.33485	5.44261
NCF4	-0.126566	7.09128	7.72076	6.38249	7.20154	5.17313	7.13463	6.8071	7.28771	4.82883	7.10318	8.14588	6.64573	7.37799	8.32625	6.851	6.46303	8.24532	7.15289	8.13837	6.75489	0.0426443	7.76971	0.650765	7.51467
CSF2RB	0.316129	3.45549	3.43696	2.37851	3.99458	0.815575	3.65421	2.13093	7.51136	1.25096	3.03914	2.91265	5.08321	6.56423	3.14731	2.44361	6.01636	4.28318	4.488	8.81327	2.29866	0	8.19938	3.34199	6.69153
SLC25A17	0.178044	3.9607	3.6311	3.95047	3.92505	4.51412	4.89724	3.02326	5.39541	4.13668	3.48156	4.04701	6.0398	5.24641	3.50335	3.78555	4.31325	4.34554	3.89918	5.11103	4.19456	4.46401	4.41684	4.93074	3.88362
FAM118A	-0.0832721	3.91552	3.93452	3.84499	4.31542	6.10056	4.05311	2.55827	5.96116	3.36877	4.59395	2.78031	5.57652	5.59515	3.63923	6.97934	4.89869	3.99005	4.82069	3.86295	3.33771	3.24945	5.54628	4.16912	1.79909
KCTD17	-0.175914	3.8679	3.41819	2.82375	3.76129	0.432959	2.35614	1.74416	3.30451	2.80323	3.67016	0.704872	3.488	1.09761	2.75916	2.9542	3.32912	2.06695	4.10266	2.64386	2.57289	4.43363	3.16672	1.45943	1.7866
ST13	0.0447616	8.00579	7.08736	6.66448	7.54589	7.59193	7.99955	5.62527	7.52097	8.17368	7.09286	7.12516	7.47306	8.47662	7.58541	7.17483	7.78372	7.45171	7.3557	7.84518	7.1823	7.38189	7.62834	7.1818	7.28438
RBX1	0.153375	5.99345	6.31976	6.27258	5.48027	6.50748	6.50367	6.82617	5.45648	5.91193	6.65163	5.93074	6.07082	6.19653	5.95163	6.32517	5.78215	6.70515	6.34305	6.58451	6.06199	6.10832	6.54102	6.88228	6.19318
EP300	-0.22712	4.8885	3.67129	3.89336	4.70653	4.46467	4.71149	2.86592	4.16912	4.83996	4.50589	2.91265	4.78188	4.54411	4.38128	4.58916	4.41346	4.05224	4.99186	4.16591	3.83289	3.78136	5.16591	3.04264	2.7866
L3MBTL2	-0.437663	5.0036	4.36247	4.17552	3.71149	4.02326	4.3427	3.24641	3.19692	4.30159	3.77083	4.06437	3.41278	4.50526	3.73444	4.25852	3.94298	4.42626	4.69544	4.22265	3.78973	3.18269	4.16752	3.50716	2.79286
RANGAP1	-0.29104	5.97292	6.29554	5.84222	5.50239	6.55995	6.1819	4.66846	5.4192	5.83314	5.9397	4.72356	5.98664	6.05398	5.32085	5.79572	6.83832	6.2075	5.93499	5.02148	6.07874	5.88118	6.26922	5.37955	4.25399
ZC3H7B	-0.205126	5.23764	4.38819	4.18982	4.42291	4.62117	4.98504	3.0054	4.71864	5.05181	4.32048	3.70377	4.59036	4.916	4.37782	4.45615	5.07296	4.852	5.19377	4.62	4.33342	5.04614	5.43896	3.45549	2.926
PHF5A	-0.143578	6.41988	6.07553	6.2937	5.85674	6.42206	6.65492	5.13299	5.85474	6.20809	5.64847	5.56438	6.17413	6.21529	5.41244	5.99073	6.57833	6.53947	6.30743	6.5452	5.8711	5.6372	6.32517	6.61559	5.46205
ACO2	-0.0883475	6.01614	5.43696	5.67356	5.40735	5.50716	6.46091	3.95513	5.46761	5.66959	6.34643	5.33914	5.55152	5.89191	5.45943	6.22284	6.51649	5.85375	6.45992	5.99752	6.0197	5.89288	6.25077	5.3194	3.83086
POLR3H	-0.42393	5.47606	5.01525	4.24717	4.12184	5.11686	4.75275	4.28392	3.81558	4.45812	4.32769	3.18428	4.79961	4.13422	4.39438	4.43363	5.23917	5.44758	4.4363	4.55827	3.40463	4.24717	4.10936	4.99684	2.93546
TRMU	-0.389735	5.23649	5.35826	5.11228	4.90929	5.85773	6.03496	4.29057	5.05615	5.21723	5.21257	4.26078	5.31325	5.45418	4.3427	5.11894	5.73688	5.45385	5.31976	4.15947	4.32265	4.44559	5.82222	4.88166	3.40735
PMM1	-0.159375	5.24375	4.19535	4.38819	5.5292	4.8679	3.26003	4.10769	2.854	4.17393	4.99005	4.19535	2.77821	3.70819	5.49793	4.92647	3.55949	5.20359	5.2407	3	5.36562	5.72683	3.14731	3.93546	3.58856
DESI1	-0.486462	4.88753	3.87971	4.76977	4.93499	4.5097	4.21179	6.07682	4.5601	4.9331	4.83491	4.13093	4.61412	4.10182	4.21801	5.00988	5.06393	4.49697	4.48864	3.01792	4.45022	4.38612	3.41278	3.41007	2.41684
CERK	-0.206314	4.53419	4.49506	3.69153	4.44294	4.12019	4.41954	2.47249	3.57046	4.59276	4.52795	3.74846	3.86592	2.91265	4.7137	4.37016	4.15056	3.56438	4.36947	4.06091	2.83996	4.05832	4.22188	1.43829	4.35403
BRD1	-0.256381	4.57894	4.32553	3.84197	4.54226	4.21412	4.23573	3.03034	4.0635	4.41886	4.35473	3.60999	3.93168	4.56438	4.61706	4.84449	3.84699	4.28466	4.4522	3.60763	2.93168	3.1177	4.84398	3.18745	3.61706
ZBED4	-0.176407	4.22805	3.66789	3.73985	4.02503	4.12928	4.51538	1.99639	3.94017	4.62117	4.02503	3.19692	4.16752	4.50653	3.46989	4.27501	3.81455	4.22265	4.21801	4.09508	3.38681	3.17792	4.52795	2.50843	3.1177
MLC1	-0.393418	7.48639	5.88044	6.72192	5.68342	7.33262	6.11458	5.43162	5.6153	6.22072	4.19771	4.61765	5.92624	7.83169	0.443607	5.30706	5.21374	6.21723	4.71644	6.23016	4.55397	0.0426443	6.42375	4.56316	5.21218
HDAC10	-0.384667	5.90472	5.89748	5.24945	5.19456	5.30852	5.13668	4.2891	5.44593	4.86641	5.51728	4.37921	4.16993	5.35966	5.32841	5.45121	4.88215	5.80607	5.70016	3.61117	5.46499	4.30889	5.89433	4.16752	4.4019
ABHD4	0.670189	1.32769	1.26303	2.32193	2.70266	0.565597	2.83592	2.08406	2.66903	2.59694	1.73118	2.28392	2.89142	4.11936	3.32193	2.27202	3.51854	1.81147	2.33342	3.12598	4.0009	2.59694	3.67016	3.14405	4.0993
KHNYN	-0.201126	4.77505	4.05572	3.95791	4.7666	3.92505	3.53605	3.47379	3.87578	4.03034	4.54844	4.12516	3.69377	4.34767	4.59455	4.51223	3.94579	4.04439	5.39712	3.63343	4.39985	3.7845	4.81762	3.33485	3.02148
FKBP3	0.0258154	5.80555	6.51128	5.9357	5.8189	6.38128	6.3978	6.14364	5.17473	6.57501	5.97108	6.04483	6.1416	6.22978	4.52356	6.33485	6.27984	6.14934	5.76765	6.34287	5.20398	6.22226	6.37086	7.16007	6.03716
SDR39U1	0.0764637	5.64299	5.64184	5.54659	5.77268	5.29131	5.42995	5.2211	5.56834	5.26491	6.11541	5.97797	5.36667	5.46107	6.08449	6.13072	5.03738	5.91839	6.17213	4.77558	5.27426	5.34589	5.58496	5.77952	5.72329
CTSG	-0.297181	12.0733	7.42878	9.0165	9.17542	7.06329	3.38957	7.0899	1.70487	7.23821	11.5762	7.17862	2.80323	3.22188	10.7226	11.1883	0.286881	8.9028	11.1238	0.85599	10.7624	0.0703893	1.76553	0	7.73762
RBM23	-0.187578	5.66363	5.03474	5.36177	5.8824	5.44394	5.27612	4.2502	4.51791	4.59395	5.52732	4.56438	4.81558	4.8475	5.58376	5.94416	4.9364	5.62352	6.03892	4.70099	5.0036	4.72083	5.26379	4.49057	4.89966
PRMT5	-0.22559	6.69153	6.02702	6.54241	5.9148	6.606	7.14792	4.44228	6.07382	6.38111	5.54319	5.87971	6.79181	6.80439	6.29149	5.76765	6.54905	6.18349	6.51948	5.94134	5.79909	6.69711	6.39506	6.41853	4.77716
COCH	-0.255766	3.14405	0.903038	4.10936	5.11437	6.71932	4.40531	2.52105	5.19377	6.93923	4.19298	3.38819	5.31868	0.545968	1.28688	4.34767	0.0426443	0.275007	0.0840643	2.0321	0.0565835	2.31904	4.6153	5.94369	1.34483
AP4S1	0.176699	2.1375	1.43296	1.80323	1.56071	1.926	3.1177	1.91456	2.83188	2.852	1.73552	1.38957	3.19061	3.16189	1.36737	1.93734	2.91265	2.05658	2.73552	2.23573	0.863938	1.54102	2.99639	3.42358	2.08746
POLE2	-0.0423979	4.01792	4.43429	3.90593	4.05224	4.78031	4.28614	3.68482	3.87578	3.57773	4.06523	4.06523	5.31651	4.59036	2.68257	4.48027	4.46663	4.56621	4.29278	3.99729	3.9982	3.76871	4.65821	5.02192	3.28688
VCPKMT	-0.191698	2.69599	3.35332	3.30159	3.26303	3.18587	3.67694	3.4019	2.53107	3.66562	2.9782	3.13422	2.95047	3.24793	2.33342	3.54844	3.18587	3.16993	3.38405	2.29278	2.64616	2.52105	2.97269	3.62176	2.71149
SOS2	0.167427	3.43962	2.73118	3.00899	3.853	3.0321	3.04614	2.52857	3.41414	3.488	3.38543	3.80839	3.60526	3.64616	3.22342	3.94017	2.774	3.48027	4.0798	2.82985	3.14731	2.89918	4.0045	3.28688	3.06005
CDKL1	0.0536143	2.54597	2.52857	2.05658	2.80941	2.76341	3.66334	1.14405	3.63227	2.15056	2.09761	2.85	4.25927	2.53605	0.678072	2.76129	4.47379	2.84599	2.80116	1.85599	3.18745	2.81762	4.10434	4.32553	1.0635
NIN	-0.347728	5.142	3.53978	3.66676	4.90737	4.38888	4.74255	2.91648	3.22188	4.30816	3.40599	3.57046	4.03826	3.08576	3.03562	4.21412	3.67129	4.30889	5.17193	2.50589	3.84197	3.83086	2.40054	2.19849	4.02591
PYGL	-0.280234	7.30296	7.80381	7.63343	8.82279	7.19367	6.54998	7.23907	5.6893	7.83321	7.06985	8.39883	5.46401	5.34092	8.0728	7.06577	5.21218	7.23237	7.30095	3.33199	7.45951	7.81493	2.51096	6.71425	7.42551
PSMC6	0.0524238	6.31361	6.13709	6.33056	6.09318	6.28021	6.54117	4.44493	5.89724	6.59036	5.77505	6.45055	6.5656	6.3658	5.23879	6.1373	6.61662	6.01056	6.09866	6.60021	6.12288	6.51412	6.68159	7.16822	5.55735
GNPNAT1	0.0893456	3.22188	2.86987	3.46858	2.58256	3.96625	4.48027	0.933573	3.79077	3.86295	3.2765	3.02148	4.80168	4.12433	3.11103	2.68032	4.92458	2.15704	3.79701	3.84499	3.60881	5.87455	4.00899	4.2211	1.68257
DDHD1	0.0590233	2.72901	2.18269	2.04963	3.32769	2.48027	0.0703893	1.67356	1.44361	2.56071	2.69377	2.47249	2.52607	2.93923	1.5509	2.73118	2.84398	2.68032	3.56438	1.40054	2.44361	2.55827	3.32912	2.4957	1.50589
CDKN3	-0.196446	6.50414	5.92932	5.78267	5.72765	5.34199	6.76235	5.04045	5.07682	5.79961	5.95745	5.90737	6.29976	5.04745	4.57168	5.42526	4.81609	6.36824	6.0217	5.02059	6.75221	6.71342	5.87086	6.78947	4.62936
CNIH1	0.096785	6.72955	5.87406	6.15826	7.39129	6.68145	6.73958	3.66221	6.36194	6.15623	5.93687	6.50398	6.99118	6.75769	6.88484	6.2791	6.43313	5.96023	6.80038	6.14731	6.29737	7.13011	6.2032	7.18755	6.16591
CGRRF1	0.369117	2.07724	1.94486	1.81558	2.55336	2.41143	2.65535	1.86394	2.51854	2.21412	1.94111	3.10601	3.41414	2.73335	1.73985	2.47508	2.55827	3.1635	2.79077	2.58736	2.31034	2.83188	2.68032	3.57773	1.96347
ATP6V1D	0.228759	4.6011	4.87529	4.77136	4.393	4.54844	4.8125	3.03562	3.67694	4.45352	4.15056	4.70155	4.1643	4.70874	4.16108	4.65076	4.02945	5.22381	4.93121	3.95233	5.08576	5.50684	4.85649	5.52011	4.96394
PIGH	0.25395	3.66448	3.56925	4.10266	4.14323	4.25626	2.49313	2.93357	4.2817	3.53232	3.50208	4	4.42626	4.57107	3.34767	4.1635	4.66448	4.29572	4.50335	3.60051	4.51791	3.7148	4.58135	5.56346	3.17313
PSMA3	-0.155463	7.51207	7.53271	7.71177	6.98743	7.61007	8.11155	6.34997	6.85449	7.49017	7.29011	7.25427	7.78862	7.3679	5.9674	7.15674	7.92487	7.66562	7.36229	7.4192	7.22246	7.01246	7.57841	8.41857	6.48848
VTI1B	-0.0957221	6.43045	5.87603	5.20789	5.33521	5.9479	5.92979	4.21101	5.46434	5.44791	5.75942	5.4363	5.72901	5.90857	5.0237	5.33985	6.06867	6.35755	5.66874	5.00135	5.59544	5.62029	6.12701	6.77017	4.94298
TIMM9	0.184033	5.75862	5.8885	6.2211	6.1532	6.17473	6.83643	5.35473	6.05246	5.77452	5.20906	6.86183	6.08852	6.75889	6.33128	5.60051	5.75889	6.2709	5.92529	6.08661	6.59231	6.22709	6.26285	6.84285	5.88826
GSTZ1	-0.0107398	3.9855	4.87086	4.10098	5.38785	3.82273	3.46597	4.25701	3.96347	2.58496	5.393	2.80116	3.78973	4.41481	5.17592	4.93829	4	4.1643	5.28059	3.23573	3.80735	4.18428	3.52857	5.8953	3.67807
KIAA0586	-0.0913331	4.03386	3.62293	3.70708	3.28392	3.61589	3.77716	2.87381	3.48285	3.70155	3.2032	3.58376	4.38267	4.45681	2.81352	3.69377	3.63575	4.07553	3.75275	3.69933	3.78031	3.77505	4.16511	4.03298	2.65764
TMED8	-0.261045	3.84599	3.86295	3.68482	5.3427	3.1177	4.11686	1.84398	4.43563	3.29572	4.57046	3.11603	4.4822	3.72683	3.13093	4.38198	3.53978	3.15866	4.20085	2.36177	3.34056	3.30743	2.65306	3.04789	3.33342
AHSA1	-0.183891	7.78247	7.58752	7.21936	6.69446	7.95826	8.08847	5.6241	6.98857	7.3906	7.39412	6.49442	7.70915	7.81442	6.57833	7.26922	8.4801	7.7451	7.13494	7.03375	7.01324	7.62585	7.26529	8.01931	5.94087
DAAM1	0.326975	1.97453	1.27501	1.55582	2.28983	2.26003	2.08746	0.516015	1.67807	1.99277	1.12433	1.44361	3.854	2.95047	1.3505	1.65992	3.76977	2.29866	3.0268	2.68257	1.81558	2.04264	4.25172	3.40735	1.56071
SPTLC2	0.202756	3.27798	4.79753	3.00899	5.86419	4.37086	3.60288	1.9222	5.84298	4.09001	3.6241	3.71918	5.94486	4.20711	5.58706	4.0072	4.86542	3.3505	4.69488	3.72792	4.0798	3.35755	4.28762	4.51602	4.96347
RIN3	0.415855	2.55582	3.50335	2.36177	4.45352	3.65764	4.21179	3.38267	3.82579	2.75275	4.15785	4.03474	3.72683	5.34837	3.61824	3.76871	4.35403	3.43029	4.78188	4.80993	4.63807	2.06005	4.77452	2.88362	4.66676
ALKBH1	0.147443	3.38405	3.31759	3.02148	2.9542	3.5472	3	1.5008	2.81558	3.07039	2.72028	2.81147	3.14893	3.32912	3.04264	3.56682	3.73118	3.8125	3.21412	2.854	3.1177	2.60407	3.13914	4.13422	3.19377
SNW1	-0.0165412	6.34145	5.97751	6.2034	6.40514	6.13504	6.12433	3.97269	6.04439	5.97522	5.92101	6.05028	6.29149	6.35403	6.01123	6.12701	6.30195	6.32643	6.41819	5.78188	6.04111	6.0881	6.38595	6.43329	5.38785
ITPK1	-0.0178339	4.34696	4.6565	4.11936	4.60703	5.02503	4.30232	3.904	5.06867	4.28392	5.79675	2.88166	5.13093	4.34554	4.83542	5.45713	5.20477	5.16511	5.31796	3.78973	4.22882	3.6837	4.48543	4.2765	4.03562
DHRS7	0.432191	3.96717	4.15866	5.14282	4.89482	5.52325	6.26604	3.76341	5.64501	5.34127	5.63517	5.7845	6.16169	6.32427	4.13093	5.83895	4.48607	6.8198	6.81019	4.94345	5.37678	5.70432	5.31759	5.33378	5.59365
PPM1A	0.0994344	4.24336	3.96717	4.40463	4.31976	4.25399	3.91839	2.63923	4.57531	3.53232	3.98277	3.57168	4.87431	4.65478	3.74308	4.74739	4.48671	5.0781	4.91791	3.89045	3.19377	3.43162	4.75702	4.97865	3.84298
CEP128	-0.271285	3.19535	2.40054	2.84197	3.77926	2.41143	3.22497	1.57046	1.848	3.09761	3.29572	2.02857	2.41684	2.62527	2.17632	3.22033	2.89336	2.68482	3.64731	1.52105	2.8339	2.26003	2.57531	2.45681	1.76977
ERH	0.0200948	8.44617	8.85137	8.62575	7.73897	8.7496	9.02428	7.15168	8.11634	8.41003	8.23769	8.63194	8.34007	8.61592	7.79584	8.27854	8.61475	8.7284	8.51971	9.06434	8.39489	8.37743	8.69091	9.83221	7.732
HIF1A	0.175493	4.56499	3.5472	3.9542	4.65821	4.39712	5.22458	2.22342	4.10852	5.05485	4.17792	3.76765	5.53356	4.7845	3.75168	4.18666	4.46793	4.56316	5.30852	4.03562	4.03562	6.06329	5.36842	4.29352	3.98277
SUSD6	0.115425	3.61353	2.79077	2.34199	3.34056	2.66221	3.7366	1.14405	4.09424	3.16993	3.32912	2.88166	3.76871	4.90497	3.11936	3.02148	3.47379	3.72465	4.19928	2.8953	2.16027	2.14078	5.0993	2.47508	3.08746
SRSF5	0.130714	8.39562	8.36977	8.15714	7.70915	8.11634	8.47788	6.80916	8.47525	8.16078	8.86697	8.6499	8.18819	8.80355	7.96573	8.71699	8.67944	9.102	8.83693	8.2254	7.99407	7.67384	8.91743	8.41354	7.85823
EIF5	-0.275338	7.32859	6.09381	6.11645	5.96924	7.1205	6.92232	5.32625	6.43546	6.42694	6.41954	5.94603	6.9659	6.95338	5.48704	6.45039	8.02542	6.62819	7.45278	5.62936	6.24489	6.52246	6.39951	6.10119	4.3799
DICER1	0.118593	3.49697	2.74846	2.70929	3.53978	3.74846	4.33771	1.57046	4.2032	4.26604	3.9542	3.78764	4.6837	4.1375	2.31325	3.60407	4.71534	3.66903	3.95327	3.24489	3.26604	3.51096	4.51033	3.68032	2.54102
ZFYVE21	-0.0402951	4.53294	4.86493	4.36597	4.09845	4.39506	4.82273	3.5435	4.59096	4.41007	3.84699	2.45943	5.18824	4.90785	4.65306	4.61353	5.60348	4.79494	4.43229	3.37156	4.50653	4.33271	6.11499	5.23419	3.01614
MTHFD1	-0.217285	6.40718	6.55444	6.41515	6.42055	6.92884	7.23592	5.73335	6.53854	6.72356	6.38215	5.98368	6.74873	6.98914	5.79233	6.31433	6.62	6.55873	6.37712	6.20828	6.68145	6.24146	6.85848	6.5168	5.75995
ZC3H14	-0.017055	5.30998	3.95047	4.33199	5.0781	4.96993	4.74255	2.93357	4.04789	4.7761	4.34412	4.65076	4.75649	5.19731	4.08491	4.47379	5.49281	4.87627	5.01033	4.0045	4.63227	4.81711	5.12474	5.77215	3.38405
TELO2	-0.487702	6.11124	6.20965	5.91862	6.36475	5.65449	4.46597	5.20789	4.94673	4.28244	6.21859	4.25323	3.59813	5.08534	5.68201	6.07895	5.62059	5.9798	4.93404	2.74201	5.62381	4.75061	4.86691	4.4614	3.80735
PCNX1	0.00383075	3.28836	2.97269	3.23573	4.91169	4.69488	3.75702	2.37573	1.52105	4.30451	4.58736	4.17073	2.38957	1.23879	4.69988	4.0798	2.58736	4.40463	5.20359	1.9486	4.41278	3.34625	2.91073	1.87971	3.926
GSKIP	0.172452	3.35332	3.33342	3.30889	3.09255	3.57531	4.38405	1.46467	2.58736	3.23879	3.09255	3.53107	3.16993	3.65992	2.08746	3.40871	4.68706	3.29719	4.96116	3.6427	2.63923	4.51854	5.14078	3.7126	2.86987
VRK1	-0.0220874	5.76713	6.15076	6.26247	5.98732	6.00742	6.61559	5.17473	5.88484	6.16872	6.20692	6.25965	6.33753	6.12309	4.63227	5.9798	6.6314	6.53496	6.37173	5.83668	5.854	5.31433	6.24489	6.79168	5.55182
PSMC1	0.0110217	8.07831	7.53232	7.78129	7.22062	8.01207	8.37121	5.35509	7.4596	7.63227	7.69676	7.53037	7.65607	8.00141	7.07895	7.55819	8.96826	7.87541	8.07446	7.64818	7.85922	8.35685	8.37743	8.09519	6.53978
RPS6KA5	0.15122	1.68706	1.46989	2.27501	2.1635	2.64616	2.21101	0.594549	2.47508	1.69153	2.40327	1.90689	2.65764	2.3978	2.35614	2.41143	2.26903	1.85997	3.32048	2.48285	2.50589	2.6017	2.65764	1.0072	1.37295
PPP4R3A	-0.0445855	5.8505	5.64126	5.40293	5.80478	5.61618	5.86419	4.99503	5.34625	5.74012	5.27016	5.43029	6.01369	5.79338	5.1469	5.52168	6.44344	5.93711	5.84474	5.45483	5.20046	4.39025	5.9982	6.20261	5.3565
C14orf93	-0.129034	3.0054	2.68706	3.19061	3.849	3.12267	2.66676	3.69153	3.46336	2.85798	2.84398	3.61706	3.5656	3.86394	2.19535	3.15381	2.29572	3.58135	3.65191	3.41549	1.47508	3.29719	2.5008	2.85	2.8679
PSMB5	-0.0667193	7.2465	7.05289	6.87615	6.81211	7.32157	7.50922	5.35579	6.78542	7.06544	6.81992	6.17632	7.09887	7.33539	7.12763	6.93416	7.82693	6.62542	6.53356	7.17423	6.67384	7.58871	7.43588	7.82953	5.85524
YY1	0.207736	5.28429	4.81967	4.83441	5.29462	5.14037	5.00315	4.55704	5.29241	5.03606	5.36072	4.96625	5.92552	5.46172	4.86245	5.38128	6.22458	5.61265	5.64904	5.1177	4.72629	4.39985	5.63256	6.73742	4.68986
ACIN1	-0.359849	7.52623	6.76195	6.73281	6.96509	7.20955	7.24384	6.71918	6.64068	7.32184	6.95965	6.36142	6.94755	7.08821	6.8775	6.9331	6.96313	7.39746	6.97705	6.36317	6.57304	6.19042	7.53084	6.97865	6.12102
CCNB1IP1	0.152626	5.65019	5.50176	6.30177	6.99095	5.45121	6.33896	7.28854	7.05799	6.21335	5.32733	7.15157	6.78398	6.54612	7.37712	5.79805	5.42694	4.79129	7.00955	6.98071	6.29627	5.08449	5.21956	6.87885	6.97648
TRIP11	-0.0659639	3.35896	1.75275	2.74416	2.60881	2.26604	3.21412	1.59932	2.64616	3.14078	2.37851	2.29278	3.08746	2.70266	1.76129	2.64616	3.37434	2.55582	3.06178	2.1635	2.24489	3.0018	3.28392	2.17313	2.21101
APEX1	-0.576006	8.52042	8.89269	8.37495	9.13461	8.3726	8.12567	7.44493	7.2914	8.43966	7.77353	7.3773	7.54257	8.30588	8.19962	8.17547	7.6388	7.69146	8.16747	7.67143	8.24417	7.41903	7.85312	7.66391	7.44882
PABPN1	-0.220689	7.5238	7.56133	7.13227	7.29278	7.3608	7.61353	7.48188	7.38836	7.12866	7.30515	7.1152	7.08979	7.65392	7.09402	7.54435	7.58067	7.94064	7.55551	7.26622	7.04034	6.53667	7.18418	7.97154	6.73539
CINP	-0.143595	4.97728	4.87578	5.13299	4.81711	4.73823	5.25399	5.38474	4.48671	4.47638	4.47508	5.25399	4.8515	5.01881	5.14649	4.8268	5.12928	5.23879	4.85549	4.80529	5.26978	5.44526	4.94579	5.98573	3.31034
SRP54	0.0942482	5.3799	5.0063	5.2902	5.3572	5.42122	5.77952	3.35614	5.41752	5.42223	5.22805	5.22766	6.01502	5.74201	4.27798	5.49442	5.57592	5.47832	6.03716	5.0321	5.40088	5.76235	5.90593	6.25134	4.42962
CHD8	-0.0495168	5.71315	5.01033	4.67807	4.93782	5.31433	5.38198	4.79077	5.23189	5.12226	5.06178	4.852	5.53574	5.36842	4.86691	4.93923	5.97361	5.58105	5.36387	4.85848	4.44162	4.58436	5.60674	5.34908	5.03914
PCK2	0.0115589	4.49249	4.26078	6.66846	5.75435	3.8748	5.11312	7.30606	6.73579	5.29719	4.69209	4.96809	5.09339	7.38896	6.93298	5.65478	4.85	4.29793	7.44807	3.6427	6.53138	5.61471	4.6893	5.93782	3.7301
PRORP	0.388655	3.70598	3.61824	4.06609	4.21179	4.41549	4.44493	2.59694	3.56194	4.01525	4.32337	3.86888	4.34908	4.50526	3.22651	4.07382	4.62936	3.96809	4.28392	4.61176	4.32048	4.23879	5.49633	4.84449	4.23113
DCAF11	-0.0376692	5.40973	5.06566	5.46074	5.40667	5.40054	6.17393	3.88362	5.51254	5.46205	5.47476	4.48285	5.52168	5.7148	4.92077	5.62117	5.36072	6.20046	6.30889	5.1035	5.58286	4.84046	6.56423	4.50398	4.50398
PSMA6	-0.145497	7.79727	8.32944	8.39635	7.75067	8.07125	8.65664	7.68685	7.28605	8.21791	8.22265	7.69125	7.972	7.91439	7.7664	8.10444	7.8249	8.55259	7.89124	7.85381	8.24232	7.77742	8.32697	8.06539	7.6011
NFKBIA	-0.0284508	5.29352	4.77189	4.0045	4.71973	5.2854	4.29646	4.5509	4.50526	4.52795	5.87209	4.35966	3.8885	4.56864	5.97039	5.27389	4.22265	4.77979	5.04177	5.12143	3.93357	4.69599	4.71864	3.78031	5.11562
EMC9	-0.309988	4.2891	5.06178	3.77505	4.32337	3.85599	5.06824	3.87578	4.11353	3.54597	4.09085	3.54967	3.57289	4.57652	4.69098	4.54535	4.03298	4.45878	4.55213	2.41414	3.5741	4.17393	3.82579	4.58075	3.10434
PSME2	-0.271783	7.98351	7.93239	7.51199	6.9191	7.59999	8.03315	7.42677	6.86505	6.97396	7.70556	7.61117	7.3378	7.16027	6.71987	7.94679	7.74436	8.05604	7.7761	7.10108	7.24413	7.05474	8.20814	7.89893	6.50668
BRMS1L	-0.123598	2.34199	2.33914	1.80323	2.26903	2.53356	3.40327	1.09761	2.59455	2.58736	2.14731	2.27501	3.18745	2.27798	1.73985	2.24793	2.86987	1.63227	2.22033	2.30451	2.25399	2.78031	2.1375	2.96532	1.18269
REC8	0.0929541	3.32625	2.72901	2.42492	3.37434	2.35614	2.37573	2.30451	2.72465	2.25096	2.20477	1.93734	2.25399	2.12763	3.37016	3.30743	3.06867	5.6792	3.07211	0.584963	2.03562	1.65535	4.59753	4.33914	2.72683
TM9SF1	-0.0534877	5.02414	4.40463	4.49761	4.47379	4.72574	4.70598	3.02148	3.70044	4.53169	4.50016	3.88069	3.98641	4.55029	4.36597	4.94813	4.64789	4.93168	5.44956	3.87873	4.44626	5.01659	4.69877	4.63633	3.80529
SEC23A	0.302836	2.75275	3.06867	3.18587	3.68706	3.88753	4.20242	1.28096	3.52231	4.01525	3.55827	3.7148	4.16108	4.01614	3.73552	3.6792	4.39025	3.01078	5.54288	3.81147	4.74846	5.90448	4.31107	3.32481	2.53107
GMPR2	0.277737	5.98071	5.85	5.84222	6.41109	6.0433	5.69349	5.54319	5.87823	6.58901	5.81224	6.4494	5.40361	6.40565	6.02923	5.88753	5.65306	5.9364	6.78751	5.94205	6.1206	6.28263	5.95815	6.21665	6.455
PNN	-0.208534	6.97246	6.95093	6.96081	6.67384	7.06706	7.90262	6.12391	7.29673	7.2666	6.89069	7.06846	7.40412	7.32984	5.11103	7.24413	7.71493	7.6427	7.30223	6.65492	6.82464	6.38785	8.04062	6.56651	5.19849
RABGGTA	-0.363911	4.64674	4.84147	4.65707	5.20789	4.17313	4.74846	4.88655	4.24641	4.34412	5.05181	4.0268	4.11686	4.54164	5.27202	4.71918	4.19535	4.82222	4.80941	3.30305	4.11853	3.57289	4.50271	4.44228	3.96162
PLTP	0.0419861	5.12557	2.40327	2.80323	4.66676	6.07146	5.52325	4.32912	4.51602	6.58782	5.52136	3.18428	3.98641	5.24679	5.31796	6.51302	6.86233	4.11187	5.83668	5.01792	5.2902	5.00764	5.92148	6.50922	0.422233
PCIF1	0.149377	4.41954	4.5097	4.74631	5.21335	5.21101	4.40667	3.68706	4.57531	4.15299	4.848	4.14241	4.24336	4.97269	5.26978	4.96763	4.63459	4.98596	5.29719	4.41616	5.59694	4.66846	4.90641	4.66391	4.29866
GSS	-0.0271105	5.67694	5.35085	5.66192	5.62585	5.66846	6.12474	5.86419	7.30396	5.71287	5.9528	5.07938	7.52003	6.10287	4.89966	5.88874	5.71425	5.71425	5.84674	5.49633	5.8622	6.38111	6.06695	6.08895	4.95187
TRPC4AP	-0.025228	5.6946	4.77083	5.27873	5.66704	5.56133	5.31216	4.1235	6.3107	5.42761	5.80735	4.95466	6.32661	5.9364	5.13873	5.58586	5.51444	5.29902	5.64357	5.05224	5.65992	5.86344	5.58195	4.69488	4.90545
PYGB	-0.113531	4.66391	4.30961	5.12557	4.36667	4.74039	4.94533	3.83592	4.0798	5.5744	3.78136	3.95791	4.0045	4.30816	4.14405	4.11686	3.89239	4.08746	4.88118	3.84298	4.98596	8.98068	4.37643	3.63227	3.09255
ABHD12	-0.379815	5.72165	5.51791	5.46041	5.78607	4.49442	4.48091	6.11936	4.08236	4.91169	5.30889	4.74846	4.02857	4.65764	5.25927	5.33199	4.23266	5.15137	5.20242	4.50271	6.48253	5.44128	4.1235	4.12928	4.27277
PROCR	0.0561867	3.36597	2.19535	0.963474	4.86047	0.594549	3.70708	2.60881	3.37434	4.41481	1.90689	0.925999	4.88362	0.584963	1.38405	0.687061	2.20477	3.22033	4.45352	0.62293	5.21412	8.10633	0.731183	1.73552	3.67807
GINS1	-0.209338	4.54844	4.12516	4.66107	3.98914	4.75061	4.97453	2.28688	3.9542	4.22419	4.4614	3.9982	4.81916	4.24336	3.35896	3.90111	4.07125	4.22651	4.93121	4.46728	5.21335	3.82883	4.49953	4.16269	2.79494
UQCC1	0.151422	4.96763	4.60288	4.849	4.43763	5.18269	4.93546	3.68706	6.18428	5.09677	4.88118	5.45943	6.24584	4.89772	4.19535	5.2709	6.13709	5.02104	5.69349	5.20124	5.87504	6.25418	5.20281	5.15259	3.87971
ZMYND8	0.391561	3.55827	3.55827	3.52857	3.72356	4.62176	4.69988	3.69933	5.07639	4.51096	3.63807	3.10266	5.49346	6.07382	3.65076	4.02768	5.59515	3.60407	3.79701	5.71039	3.854	5.16027	6.29425	5.12433	4.44361
IFT52	0.274162	4.28318	3.91839	3.67129	4.69599	5.15097	4.24869	3.02326	3.8846	4.02857	4.24945	4.19692	3.87873	4.82222	4.20242	5.25437	4.31034	4.53792	5.11936	3.44361	5.19456	5.19061	4.46271	4.79909	4.18666
MYBL2	-0.380225	7.06329	6.21645	5.92861	5.76235	7.49321	6.63096	4.72955	5.82171	6.11749	6.29737	5.06867	6.12949	6.25323	5.78005	6.21994	6.44493	6.22284	6.48784	5.52011	6.66818	4.98413	6.25115	6.05463	4.7845
NDRG3	0.291833	3.37156	3.58496	3.29425	4.02591	4.13422	3.82273	2.87971	4.73335	4.39094	3.09085	3.89336	5.71918	3.34056	3.77926	2.9782	3.99729	4.33842	4.56255	4.30597	4.68313	5.01926	3.08406	4.17393	4.13504
SLA2	0.195353	0.687061	1.20163	0.422233	0.201634	2.04963	2.47508	0.695994	6.55689	2.02503	1.1635	2.32481	7.26857	1.04963	0.333424	0.422233	3.51728	0.545968	1.1177	4.53232	0.978196	0.0143553	4.63807	0.111031	3.5373
RAB5IF	-0.243304	7.48864	6.87566	6.71094	5.8334	7.67849	6.52168	6.42559	6.63561	6.5694	7.13924	6.56773	6.85711	5.79442	5.59455	6.90725	7.6388	7.76805	7.46866	6.28836	6.65793	6.17033	5.47638	6.80568	6.30122
NFATC2	-0.164587	2.58496	1.42223	2.77821	2.82579	2.95606	2.78869	1.69599	2.38405	1.60407	2.50335	3.22651	2.93546	3.18587	0	0.137504	0.815575	1.71809	2.41954	2.28392	2.73552	1.31034	2.95047	1.1635	2.84197
PABPC1L	-0.220718	3.51728	4.46793	4.09085	5.74524	4.58796	5.59276	4.63169	5.27947	5.1981	5.42995	3.25399	4.07382	5.36527	5.82782	5.25739	3.0072	5.22651	5.40837	0.454176	2.58976	4.44294	4.48543	4.29866	2.31034
STK4	0.0275373	4.50208	3.852	4.19061	5.12143	4.91409	4.55152	3.10769	4.39369	4.21335	4.61412	4.60703	4.64904	4.42492	4.50208	4.48993	4.57713	4.42223	4.8885	4.97865	4.51854	4.57107	4.81455	3.38267	3.9855
ADNP	-0.0103436	5.46041	5.2724	4.81147	5.30889	5.26754	5.1635	5.04745	4.7148	5.41414	5.14364	5.1469	5.34163	5.45549	5.19417	5.28651	5.63807	5.14119	5.62059	5.56864	5.374	5.03298	5.61853	4.90063	4.79077
PFDN4	0.323543	6.10077	5.90593	6.15401	6.89676	6.48123	6.20926	7.40846	6.04045	6.13771	5.51538	6.82553	6.3127	6.33128	6.26828	5.76049	6.85287	6.13607	5.8622	6.81865	6.59813	7.84568	6.00023	7.92345	7.14608
CSTF1	0.0341088	4.59036	4.36177	4.38681	4.5656	5.29462	5.56925	2.80116	4.84298	5.19574	4.60881	3.904	5.42021	4.98596	4.39025	4.46009	5.2114	4.53169	4.98231	4.79286	4.37782	4.916	5.17792	4.99141	3.87283
RAE1	0.0652949	5.02015	4.7021	4.72247	4.41616	5.60377	5.49281	3.46205	4.80323	4.81147	4.77979	4.60703	5.17871	5.06264	4.57228	4.92884	5.6985	5.17153	5.25626	4.99594	5.72982	5.39472	5.21607	5.47832	3.77821
TPD52L2	0.124659	6.29572	5.40667	5.94345	5.14282	6.50351	5.89942	4.5552	5.24413	5.71177	5.80271	5.33342	5.4002	6.19535	5.9528	6.38871	6.8421	6.01458	6.32463	6.02303	6.18903	6.70667	6.67821	6.0847	4.91313
DNAJC5	-0.224397	5.64501	4.76394	4.98368	5.08151	5.16952	4.41007	3.75382	4.27202	4.69098	5.8071	4.27277	4.06953	4.60644	5.20477	5.33128	4.86987	5.88753	5.55029	4.25626	4.91504	4.58856	4.98504	3.75382	4.17792
NELFCD	-0.208217	6.37573	6.49905	6.55228	5.69209	7.21529	6.38819	5.26454	6.28281	6.32841	6.60777	4.80839	6.40956	6.18686	5.76315	6.28688	6.9318	6.57984	6.82413	5.38578	6.71081	6.65349	7.02436	6.13443	4.7761
CTSZ	-0.365074	8.19948	7.06253	6.50668	7.09761	5.87799	6.30177	6.6879	6.24394	6.87307	7.66924	6.57092	5.03342	1.05658	6.90917	7.59597	1.42761	6.36457	5.9465	6.76301	7.95861	0.790772	4.9472	1.05658	6.54055
PRPF6	-0.0992505	6.13791	5.75114	5.81686	5.57592	6.08321	5.41549	4.88655	5.52482	5.28096	5.393	5.61589	4.97407	5.76686	6.00315	5.45483	5.90905	5.96	5.53169	6.20614	5.69877	6.12164	5.49025	5.47671	5.57228
PRELID3B	0.0250865	5.66221	5.22612	5.53294	5.59783	5.66448	6.26641	4.5509	5.83567	5.8999	5.39678	5.82018	5.93428	5.94205	5.05961	5.54504	6.25946	5.32157	6.31723	5.72738	6.27072	6.69502	5.73633	6.11061	4.27202
MTG2	-0.129939	5.06178	4.39985	5.03562	4.10601	5.21994	4.19692	4.70984	5.86962	4.50208	4.62702	4.11853	5.5345	4.65592	4.33056	4.66448	5.17911	5.21023	5.1375	4.79338	4.13011	4.96532	4.8515	4.90977	3.95977
PSMA7	-0.12065	8.58943	8.53621	7.90671	7.72424	8.84087	8.78011	7.23917	9.2826	7.96821	8.05012	7.42903	9.5709	8.32535	7.60578	8.09408	8.82005	8.672	8.34323	8.3897	8.58116	9.01828	8.33646	8.10208	7.40079
SLCO4A1	-0.189453	4.01346	4.88801	4.38543	3.12102	5.97177	5.81558	2.16027	4.49185	4.96993	4.39917	3.39917	5.02636	1.22651	2.35332	3.8166	5.41583	5.7498	3.77716	4	5.16912	3.07039	5.19338	3.15704	2.95606
MRGBP	0.0266042	4.23036	4.28614	4.02414	4.23649	4.91743	4.12019	3.05311	3.64155	4.10852	3.94673	3.27947	3.7137	3.95513	4.67412	3.77294	5.02724	4.58195	4.63691	3.8268	4.3427	4.90352	4.11437	4.47119	3.63691
TCFL5	-0.288636	3.89821	3.07553	2.71589	3.26153	3.1127	3.05658	2.55336	1.84398	2.9542	3.25096	2.74201	2.26903	2.5008	2.51854	3.30451	3.85599	2.86987	3.35614	2.23573	3.94392	3.63691	2.98003	2.16672	1.95233
DIDO1	-0.163225	4.75542	3.66903	4.08406	4.64097	4.51665	4.8748	2.98185	4.17313	4.61058	4.01257	3.88557	4.31542	4.54102	3.81352	4.58135	3.27352	5.3733	4.45022	4.25927	4.08406	4.53169	4.61294	3.75916	3.29719
GID8	0.00983492	4.56377	4.32625	4.03298	4.20006	5.0691	4.76818	2.66676	4.20398	4.54905	4.19219	4.11936	4.13175	4.67864	4.38059	4.23036	3.60526	4.68538	4.65878	4.4614	4.60881	3.98732	4.88069	4.926	3.854
SLC17A9	-0.295264	5.8107	5.83264	5.22381	4.88509	6.07617	6.49041	4.61117	4.94813	6.62059	6.15765	5.83441	4.77663	0.333424	3.61117	5.05007	0.0840643	6.55044	5.81788	4.39438	7.08831	0.0426443	5.24222	5.31107	3.75702
ARFGAP1	-0.0257597	5.50271	5.54319	5.01212	5.17911	6.28947	6.10811	4.13668	5.23228	5.58976	5.47638	4.17552	4.63865	5.47151	4.7939	5.55857	4.80271	5.9191	5.8679	4.24184	6.20574	6.14221	6.94872	5.30012	4.76022
GMEB2	-0.250263	3.40599	3.07211	2.96162	3.07039	3.73552	3.62176	2.5656	2.88947	3.13093	2.96901	2.30451	2.92979	3.34199	3.69933	3.05311	3.13258	3.64155	3.41007	2.63459	3.05137	2.87774	3.59813	2.89918	2.18903
C20orf27	-0.31492	5.95303	7.29829	6.40786	6.97533	6.82311	6.31759	5.31107	5.30597	6.32553	6.51696	4.46532	5.42828	6.01436	5.69683	6.5741	6.41785	6.83289	6.10476	5.62702	7.44518	6.60377	6.16068	5.99774	4.34908
CDC25B	0.201582	3.08406	4.44626	4.90111	5.23074	5.15462	5.02503	3.47897	4.393	4.86542	4.96347	4.10014	4.58556	4.68032	4.774	4.80116	5.07895	5.07296	5.23993	4.34837	5.60674	6.95059	5.00944	3.83794	3.5472
RNF24	0.100716	3.93546	3.43162	5.27501	4.96486	3.74201	4.26379	2.76765	3.10601	2.75916	5.22265	4.24869	3.69711	4.72137	3.21257	6.21956	3.83996	5.0691	4.99367	4.28836	5.1235	1.95977	5.19692	3.67243	4.10266
ARFRP1	-0.0363758	4.80632	4.95977	4.74308	4.52482	4.94953	4.9514	4.25927	4.80374	4.37851	4.94533	4.04527	3.92315	5.43829	4.67129	5.18785	5.8475	5.45022	5.18507	4.18587	5.38336	4.63401	5.05398	4.54535	3.98914
NDUFAF5	0.412051	2.75916	3.58135	4.1235	3.83794	4.42358	4.14649	3.71918	3.67807	3.63343	3.87774	4.30451	3.39232	4.45418	3.18745	3.61353	4.26454	4.34767	3.9991	4.04527	3.904	4.78555	3.98732	4.97911	3.83289
TRIB3	-0.066253	5.2724	3.88947	5.94486	5.17233	6.14995	5.06609	6.53869	6.17931	3.42626	3.0036	7.14537	4.80116	6.0492	6.71108	5.97659	4.39438	5.42291	6.68804	5.35156	6.09191	4.68426	4.51286	4.45812	3.73552
RASSF2	-0.163298	4.11686	4.96301	5.49729	6.02348	5.8716	2.73118	4.40463	4.39849	1.70929	4.90641	4.78241	4.62352	2.50335	5.06437	4.98778	3.47638	6.8426	6.37955	4.06437	5.97223	0.0840643	3.45022	1.23879	4.5404
CSNK2A1	0.201504	5.80761	5.41819	6.19397	5.89772	6.49538	6.42274	4.02414	6.60036	6.60229	5.74658	5.93852	7.08321	6.6642	5.75328	5.8009	6.92017	5.56102	6.23324	7.29802	6.92825	6.82464	7.06846	6.3505	5.10056
CDS2	0.635759	2.22033	2.60881	2.44095	3.4019	2.72901	3.20477	2.34483	3.10434	3.2854	3.03914	2.46205	3.48671	3.28836	3.38405	3.01436	2.89918	3.04614	3.8748	4.23189	3.90111	3.78555	3.33342	4.29425	3.25096
HM13	0.0454312	7.09466	6.70833	6.62249	6.43379	6.472	6.8431	6.21665	7.60207	6.43646	6.35085	5.82833	7.36265	6.52576	6.59395	6.78908	7.60925	7.04155	7.15846	6.59126	7.12856	6.93852	6.39729	6.30342	6.88813
SIRPB1	-0.248136	4.89433	3.32048	4.48349	6.93216	5.61677	1.19535	2.68482	0	3.26153	5.6476	3.20163	0	0.250962	4.98459	5.61912	1.0072	6.81109	7.0607	0.62293	2.6893	3.13422	0	0.0976108	2.79077
SEC23B	0.0165026	5.2521	5.06781	6.23802	5.81992	5.38509	5.01569	2.90689	5.19417	4.70819	6.95931	4.85649	5.3978	5.22342	7.33727	6.69418	5.03342	5.52105	6.43679	5.44361	5.56377	5.98755	5.28355	4.48543	4.1819
HCK	-0.197262	4.78346	5.92362	5.50779	6.07767	0.879706	1.64616	5.43129	4.853	0.678072	5.92837	6.04571	2.54102	0.584963	4.82477	4.33842	0.201634	5.79909	6.39025	1.78241	6.40412	0.0426443	0.31034	0	5.94462
TM9SF4	0.102325	5.28503	4.39438	4.49249	5.19022	4.93593	5.21684	3.82985	6.16712	4.99729	4.91121	4.78503	6.34767	5.07125	5.18428	5.04439	5.09592	4.81404	5.61941	5.26679	5.97911	5.80787	5.39335	4.96486	4.0027
CRNKL1	0.379138	2.8953	3.78241	4.50335	3.8125	4.10685	3.69377	4.76818	3.49185	3.55213	3.60881	3.77294	4.15462	4.0054	3.32048	3.80735	3.43429	4.58075	4.08831	3.87381	4.0045	4.26003	4.02059	4.99322	4.44228
POFUT1	-0.270114	5.24298	4.06178	4.52732	4.40939	5.12433	4.53916	3.48543	5.24375	4.11353	4.42626	4.16027	5.50875	4.72574	4.35403	4.85549	4.71534	3.8339	5.24031	4.14078	5.27016	5.27501	4.54535	4.03386	2.6017
SAMHD1	-0.4831	6.98573	5.75489	4.42156	6.43179	4.29793	3.34767	4.0993	1.81967	3.53232	7.57607	3.65878	2.40327	2.57773	6.17692	5.64097	2.73985	4.81762	5.71507	1.50589	1.81147	3.65992	3.39506	3.62059	1.73118
KIF3B	-0.174144	3.32912	2.30451	2.27798	2.9279	3.19219	3.25852	1.46467	3.38543	2.41414	2.28983	2.31325	3.73118	2.78031	2.26303	2.49825	3.11103	2.65306	2.83794	2.08406	2.94673	4.50335	2.51602	2.16672	1.52607
NOP56	-0.291485	7.62095	8.8289	9.19012	7.79038	9.32089	9.41762	7.74772	8.19333	8.79918	7.85487	7.73396	8.35191	8.30204	7.29094	8.12583	8.7765	8.52685	8.0549	8.70404	8.77548	8.02198	8.08082	8.76888	6.71877
MANBAL	0.0694797	4.47314	3.73985	3.61824	3.39506	4.01436	4.26828	3.0072	3.61471	3.57531	3.84398	3.49313	3.40054	3.67356	4.02945	3.59932	4.44626	3.99729	4.0197	3.2032	4.19613	5.75729	4.04527	3.89336	3.73877
IDH3B	0.123164	5.51507	6.63952	6.99899	6.15967	7.55029	6.70307	5.44758	6.78751	6.37452	7.05778	5.95582	6.69975	6.78398	5.99684	6.66747	7.11051	6.87873	6.9913	6.95884	8.10334	6.93393	6.88032	6.67356	5.36036
MAPRE1	0.0266628	6.46025	6.35896	5.99435	6.43696	7.2149	6.81263	4.49249	7.67659	5.86047	6.44692	5.88582	8.30259	6.60244	5.70183	6.80774	7.22188	6.30779	6.82031	6.89045	6.76381	6.9571	6.7389	6.77847	5.31723
JAG1	0.206549	1.16993	0.214125	3.21257	1.33914	4.65535	2.53356	1.51096	1.70044	1.97453	2.9542	4.19219	2.73552	0.31034	3.11103	1.34483	2.35896	4.52607	5.20163	2.49313	2.50589	1.17632	1.58015	0.298658	3.26303
CDK5RAP1	0.0499448	4.78241	4.95466	4.68538	4.59455	5.56894	5.18864	5.11894	6.03078	4.97499	5.43696	4.60881	6.22574	5.24869	4.21179	4.87774	5.68986	5.4002	5.09972	4.89482	5.94626	4.85997	5.53232	6.05961	3.96993
TTI1	-0.177094	4.36317	3.43296	3.64962	3.93734	4.56499	4.92172	2.68257	4.56925	4.5292	3.96993	3.69042	5.28281	4.51538	3.35473	3.2555	4.42895	4.39094	4.42694	3.08746	4.21878	3.89336	4.41481	3.96625	2.53854
E2F1	-0.349231	4.93734	4.84097	3.82782	4.22959	5.15826	4.73281	3.32048	5.3579	4.57773	4.20711	3.72901	5.10266	4.10098	3.84398	4.94345	4.23189	4.85898	4.42559	3.97453	3.97361	4.58256	4.13504	4.04177	3.57168
RPRD1B	-0.145791	4.70487	3.94673	3.71149	4.22959	4.53978	4.23266	2.66221	4.749	4.12928	3.95977	4.12267	5.14323	4.20085	3.79286	3.70598	4.57046	4.72301	4.70377	3.1177	4.42694	4.23113	4.46793	4.15381	3.01257
PXMP4	-0.116886	2.76553	2.45943	2.12102	2.39506	2.33628	2.49313	2.25399	2.45154	2.488	2.62059	1.65076	2.96162	2.53605	1.35614	3.06867	2.74631	2.92979	2.85798	1.80735	1.80735	3.32912	2.89336	3.13258	1.17632
CHMP4B	0.190724	6.07318	6.24146	5.9397	6.06415	6.7412	5.82094	5.16511	6.57334	5.45121	6.99481	5.93404	6.82349	6.1035	5.96694	6.41397	5.96463	6.52998	6.72887	5.63227	6.69752	7.2765	5.97728	6.22863	6.28928
CST3	-0.187628	8.76192	8.85583	7.01814	7.69314	6.17592	5.3147	8.28212	5.63517	3.91743	8.13935	4.30378	4.9364	6.76553	8.25758	8.56426	6.72028	5.77716	9.23122	6.07275	7.99486	7.63967	6.84172	5.97269	6.85437
ACTR5	-0.257038	3.03386	2.98914	2.84398	2.95233	3.64501	3.32337	1.87578	3.01614	2.60644	2.82375	2.13093	3.55213	2.9542	2.13093	2.25096	3.72465	3.44095	3.19849	1.5656	3.1177	2.96532	3.0018	3.2555	1.49057
AHCY	-0.151587	7.07103	6.82833	7.17463	7.93817	7.7699	7.24736	6.55888	8.56902	7.32885	7.12918	7.09519	8.58316	8.05675	7.18309	6.84536	7.72683	6.60837	6.97831	7.61066	7.83624	8.07553	6.43779	7.57531	5.59872
PPP1R16B	-0.0467549	0.871844	2.75489	1.51096	3.6837	1.88753	0.613532	0.31034	3.30889	0.594549	1.7866	1.70487	2.94486	2.57531	1.65076	2.5656	2.1375	0.124328	3.95047	0.594549	0.0143553	0.0426443	1.76553	2.93357	1.18903
FAM83D	0.0386104	4.32984	3.926	3.38957	3.52482	3.98641	4.36107	2.13422	4.03914	3.87184	3.21878	2.42761	4.27202	4.13175	3.27501	2.42761	6.70874	3.79805	3.64155	3.98641	4.0045	5.07682	6.36107	4.49057	2.32481
DHX35	-0.162509	3.74524	2.98368	3.57531	3.43429	3.99095	3.54597	2.40871	3.66903	3.77083	3.71918	3.14893	3.59096	3.60288	2.80323	2.9542	4.0781	3.65992	3.75702	3.14405	3.9991	3.48027	4.26828	3.76341	1.91456
DNTTIP1	0.19081	5.59126	5.39849	5.54288	5.1127	5.55674	5.08874	5.64068	4.5097	4.76713	5.40122	4.96347	4.53854	4.73715	5.05788	5.43429	5.21917	5.98732	5.76924	5.42928	5.60733	5.93923	4.96947	6.23534	6.06264
PIGU	0.080006	4.72955	4.34483	4.73498	5.06781	5.27053	4.76288	4.21179	5.87676	4.11603	5.26416	4.47962	6.06544	4.70266	5.17433	5.19849	4.58676	5.18626	5.54874	4.85649	5.82858	5.27277	4.6011	4.87578	4.01167
ACOT8	-0.209589	5.20555	4.88947	4.97177	4.8885	4.47054	4.29425	4.55888	4.8953	3.94767	4.67525	4.26379	4.72192	4.749	4.87578	4.66448	4.6605	4.60999	5.07296	4.80374	5.28836	4.95745	5.0197	4.91504	4.05224
APMAP	0.204471	5.74819	5.53512	6.38042	5.73118	6.24546	5.58556	4.28021	4.95884	5.47638	5.32193	6.29884	5.26866	5.35226	5.67327	6.29389	4.77979	7.37016	6.27314	5.44857	7.71706	7.21354	5.8515	5.3906	6.08704
ZNF516	-0.460523	4.49121	4.58015	4.3512	4.85	3.47768	2.0635	5.09508	2.19849	4.39369	4.06867	3.39094	2.43829	0.0143553	4.38543	5.0343	1.90689	3.9279	3.20789	1.09085	3.3505	1.83592	3.27202	1.68706	2.29572
ADNP2	-0.240296	4.47119	3.36457	3.32912	3.95606	3.06005	4.02857	2.44095	4.10936	4.12184	3.45418	3.52982	4.62936	3.98368	3.14241	3.97453	4.12433	3.33914	0.0703893	3.82782	3.27053	2.41954	4.03474	2.97636	3.08576
RBFA	-0.466372	5.06824	5.11811	4.82883	4.99277	5.08236	5.0917	3.66676	5.53107	4.91456	5.10182	3.72247	4.83137	5.14527	4.7148	5.23611	4.70432	5.53419	4.48993	3.60644	4.87135	3.30743	4.40735	4.33985	2.97085
USP14	-0.091003	5.01748	4.88606	4.84097	4.52795	5.55029	5.56682	3.849	5.26529	5.37712	5.02059	3.62527	5.95489	5.2791	4.31107	5.63749	5.78947	5.12722	5.07296	4.38612	5.05572	4.28836	5.62205	5.27128	3.85997
VAPA	0.376364	7.06501	6.72479	6.48816	6.87664	7.24336	6.47346	6.09824	7.40506	6.17732	7.35429	6.76447	7.64839	8.0872	7.26031	7.5263	7.41853	7.40786	7.30943	6.80103	6.86629	6.88935	7.33163	8.09635	7.04111
METTL4	-0.233188	2.9222	2.80941	3.02857	3.11437	2.12763	3.02326	2.19849	3.30597	2.47249	1.9222	2.29866	2.8339	2.77821	2.0321	3.52356	2.7137	2.95047	4.10601	1.87184	2.81967	2.16027	2.40871	2.72901	1.72247
LPIN2	0.0273545	3.45549	2.72247	2.19219	3.1635	3.06867	3.45154	1.55582	3.53605	3.34056	2.73335	2.12102	3.59455	3.61235	2.82579	3.70377	2.9486	3.0036	4.0365	2.06695	3.12763	2.44626	4.31976	1.774	2.88947
SMCHD1	-0.164953	4.84649	3.99729	4.77821	5.59902	5.11353	5.16672	3.43029	5.07382	5.71562	4.68482	3.80529	5.33092	4.82069	3.84599	5.64933	4.81609	5.01926	5.36142	3.91934	5.27724	3.31179	5.16229	3.61589	3.92979
MYL12A	0.0416441	8.87231	8.73535	8.5944	8.68888	8.10784	7.17552	7.94234	8.07756	6.59872	8.41971	7.6458	8.09381	8.34705	8.91178	9.70555	7.61875	8.56312	9.02095	8.42017	7.9689	8.35509	8.63289	8.57467	8.55869
CEP76	-0.175722	3.0197	3.0635	2.92029	2.99277	3.47119	3.72683	1.5656	3.16027	3.41954	2.64386	2.33914	3.65421	3.3505	2.10098	3.39094	3.65764	2.83592	3.20633	2.46989	2.7866	2.6017	3.3978	3.08236	2.0321
CEP192	-0.16025	4.09424	4.43763	4.0917	4.60585	4.00899	4.88509	2.80529	4.69933	4.90304	4.17393	3.65992	4.81198	4.50144	3.64501	5.0027	4.21956	4.18824	4.66505	3.01436	4.4489	3.98368	4.74578	3.24184	3.48929
RNMT	0.00223003	4.08491	4.20006	3.93263	4.10601	4.49506	4.38474	2.73985	4.69265	4.88509	3.77821	3.72465	4.65592	4.68818	4.11187	4.93499	4.19456	4.56621	4.71534	3.75702	4.80632	4.35332	4.60881	4.12763	2.98732
SMAD7	-0.184205	4.08576	2.17313	1.51096	2.22651	1.73552	1.85997	1.3505	0.31034	1.22033	3.72356	0.765535	0.555816	0.137504	4.20163	2.02503	0.903038	3.63227	3.62059	0.0840643	2.75489	1.13093	1.14405	1.19535	1.95977
RNF125	-0.103232	1.45943	2.35332	2.91839	3.68032	2.64386	1.72683	2.27501	0.782409	2.75916	1.83188	1.82375	1.72247	2.66903	0.83996	4.44361	1.50589	1.57046	3.53605	1.04264	3.38957	1.35614	2.31615	0.189034	2.11103
ANKRD12	-0.0665591	3.0268	1.9855	1.87578	3	2.43029	2.83188	2.96162	2.29866	2.9279	1.96347	1.51602	2.48285	2.51096	1.98185	3.33199	2.73335	2.46467	3.05832	1.58015	2.24184	2.98732	4.29646	1.68706	1.82375
POLI	-0.188028	3.6427	3.40054	3.49057	4.45681	2.9855	3.15056	3.90977	3.82782	3.74846	4.19061	2.69599	4.01614	3.84197	3.1127	4.9222	2.38681	3.66903	4.15381	1.65992	4.15704	3.53854	3.1375	2.76977	2.97085
MIB1	0.0788986	3.49953	2.75702	2.82782	3.62644	3.51349	4.14568	1.66903	4.15947	4.49633	2.80116	3.09761	4.68706	3.98277	2.59455	4.03738	4.09085	2.76341	4.23343	3.73335	3.854	3.92884	4.30232	2.77821	2.44095
RBBP8	0.0438318	4.24717	4.0798	4.90304	4.39643	5.15785	5.48091	5.80012	5.11936	4.85499	3.09761	4.79649	5.96901	5.0635	3.16832	5.30086	4.47832	5.68594	5.67807	4.34056	4.59872	4.48671	3.59813	4.71149	4.93734
RIOK3	0.100247	4.765	3.99367	4.65592	4.82273	3.86493	4.35262	4.60644	5.06307	4.99186	4.08066	5.12267	5.22805	4.74201	4.58916	5.6851	4.30086	4.44824	5.31723	3.9644	4.80941	4.03386	4.92458	4.66164	4.27501
CSTF2	-0.0698266	4.21412	3.38957	4.36107	3.7301	4.56864	4.74255	3.19692	4.30816	4.0009	3.52105	3.65191	4.58496	4.30816	3.20789	3.74201	4.48414	4.32409	4.42626	4.44692	4.5472	4.66448	4.48993	4.37851	2.63459
PSMD10	0.188377	5.32048	4.89045	5.13545	4.70377	5.71452	6.22323	4.5435	5.13011	5.50748	5.4192	5.08746	5.43296	5.58767	4.88899	5.11437	5.17353	5.78319	5.765	5.90328	6.24165	6.78764	6.05767	5.84574	4.39712
ATG4A	0.228002	2.774	2.45418	2.75489	2.41954	2.82171	2.79909	2.42223	2.57773	2.39506	2.74201	2.852	2.66448	3.18428	1.83188	2.46205	2.23573	3.59574	3.16993	2.774	3.27202	3.32769	3.68145	3.2765	2.43829
TBL1X	0.0358139	3.26303	3.34199	3.88557	0.713696	4.21023	3.14078	2.64155	3.60644	3.50335	3.46205	1.5656	3.85997	4.05658	1.63691	3.53481	3.61471	2.55336	4.41007	3.43296	3.50335	3.28836	3.69822	3.61706	2.88166
PGRMC1	0.178451	5.42021	4.1914	4.57046	4.75542	5.31832	5.48607	3.82477	5.12102	5.30561	5.04352	4.43696	5.82426	5.21607	3.86691	5.06307	5.42861	5.37469	5.9357	5.55796	6.37764	6.53325	5.41988	5.42223	4.06953
POLA1	-0.214469	3.95977	3.82579	4.20242	3.76022	4.16511	4.26379	3.22959	4.06437	4.15218	3.89239	3.51349	4.66164	4.24184	2.8679	4.13668	4.0635	4.35473	4.26454	3.09424	4.83289	3.25248	3.97545	4.72192	2.22342
NKAP	0.20694	3.33628	3.51349	3.28983	3.98277	4.07553	3.51475	4.34979	3.37573	3.40871	3.39232	3.926	3.42089	3.72356	3.38819	3.53232	3.29866	3.59574	3.82883	3.71589	4.38543	4.49633	3.36457	3.81967	3.77505
NXT2	0.0216778	4.44493	3.39094	4.5601	4.97131	3.45681	3.94017	2.75275	2.66221	3.33485	4.81813	3.87676	3.59574	3.49697	2.89724	5.30049	3.82985	4.4121	6.142	3.73444	4.88069	3.06867	3.92029	3.89918	3.70487
ALG13	-0.399732	5.0691	4.56864	4.74578	4.81916	4.71699	4.83289	4.61294	4.35332	5.11811	4.48736	4.04876	4.60881	4.62994	4.16993	5.23151	4.26903	5.36072	4.58856	4.61648	4.60288	4.59694	5.22805	4.26529	3.16511
PRPS2	-0.137488	5.47573	4.58616	5.02591	5.80012	5.33985	5.51065	4.34056	4.7845	5.03694	5.26866	4.0018	5.45483	4.8125	4.46532	5.54288	4.51916	3.47249	6.35966	4.31034	6.1416	5.59216	5.57954	5.62585	3.90689
MOSPD1	0.0836783	2.68482	2.14078	2.31615	2.7761	3.04439	3.10098	2.52105	2.65764	3.03914	1.95606	3.29572	2.91839	2.81558	1.88753	2.33628	3.39094	2.28392	3.79286	2.88947	3.62059	3.42895	3.39643	2.55582	1.69153
AMMECR1	0.115435	3.82273	2.37851	3.18269	2.62059	2.30743	3.22651	2.44095	3.77189	2.65535	4.76341	1.53605	5.86146	4.46532	2.04614	3.67469	5.47573	2.76341	3.26903	5.12763	3.27501	3.67807	5.848	5.11145	0.847997
WDR13	-0.226113	5.38198	5.40973	4.77716	5.99571	5.3505	4.51979	5.20124	5.851	4.82528	5.46597	3.76235	4.76288	5.68538	5.32553	5.40054	5.80452	5.29536	5.67948	4.97269	5.41819	5.41346	6.04308	4.98003	3.31179
SUV39H1	-0.306621	4.48414	4.39438	3.91456	4.44228	4.58436	4.37295	3.44493	2.68032	3.77505	4.22342	3.47119	3.59932	3.9855	4.06953	4.17552	3.79077	4.47249	4.51538	4.28614	5.01703	3.42358	4.20711	3.5373	2.7866
XIAP	-0.130593	3.77083	2.79909	2.97085	2.90304	3.87086	3.97636	2.08746	3.2765	3.1177	3.04789	3.0268	3.38405	3.79494	3.03034	3.19535	3.39369	2.37851	3.93546	3.40735	3.26303	4.68986	4.15056	2.59694	1.73118
STAG2	0.199718	4.80839	4.0036	4.56316	5.0955	5.47119	5.11645	3.94767	5.26566	5.32984	4.56499	5.24945	5.98413	5.56071	4.60466	5.14282	5.04352	4.97177	5.8475	5.58105	5.26604	5.23802	5.79623	4.18031	4.21335
ATP11C	0.18822	3.19535	1.70487	2.90111	3.0197	3.06523	3.9607	1.5008	3.03738	4.44758	2.65535	2.54102	4.08151	3.61471	2.08746	3.31615	3.59335	2.86592	3.9222	3.19061	3.85	3.78031	3.86493	2.55582	2.5435
ABCD1	-0.361481	4.68762	4.13422	3.23113	4.51916	2.10434	4.07039	3.0072	3.97911	3.04614	3.92505	2.37573	3.19061	2.79494	3.86592	4.33557	4.87578	3.18428	3.27202	2.12763	4.9364	2.68482	4.70708	2.0635	1.30451
CCDC22	-0.0527092	3.60881	4.20711	4.03386	4.75489	3.89239	3.14241	2.854	3.05311	3.15866	4.0798	4.34483	2.70266	3.42358	4.41954	4.02857	2.9241	4.89966	4.72137	3.95884	5.06264	3.17153	3.51223	4.08321	2.7137
PLP2	0.0895062	5.16471	6.38146	7.15856	6.05767	7.23869	5.46041	7.15198	5.79312	4.30743	6.8586	7.59051	5.35966	7.16762	7.42945	7.63256	6.02525	7.1177	7.42719	6.02503	7.50208	6.79273	6.2589	0.799087	7.94737
NAA10	-0.243459	6.57274	6.94626	6.40327	6.02015	7.14211	6.89312	7.1177	6.88166	6.40122	5.88704	6.09339	6.57122	6.65048	5.79286	6.10915	7.49185	7.18785	6.19417	5.93145	7.08343	7.15532	6.77795	6.9222	5.11645
RENBP	0.029203	4.66676	2.36737	2.67129	4.09085	0.176323	3.52857	2.04614	5.39643	2.48285	2.85798	2.62293	4.03914	2.83188	4.08491	3.73118	5.3067	2.18587	2.69599	5.11936	6.45681	0.0565835	6.0365	3.76235	1.15056
ELF4	-0.110247	4.77926	3.69711	3.68818	4.488	4.31759	3.43696	3.2854	4.9607	3.24793	4.49633	3.79805	4.73444	5.07125	4.92267	4.56742	4.43229	4.63343	4.6565	4.8748	4.29057	2.51602	4.82426	1.48027	3.34199
RBBP7	-0.0151993	7.15573	6.88142	6.58496	6.5549	7.60984	7.33468	6.38716	6.71287	7.07393	8.37056	6.59515	7.28086	7.04941	5.64847	7.23189	7.07607	7.48615	7.03089	5.6499	8.10967	6.78607	8.17802	7.83321	6.05875
SLC25A14	-0.227257	3.12102	3.19377	3.13586	3.83693	3.75916	3.49313	3.01257	2.55827	2.63459	3.04789	3.06005	3.0036	3.37156	2.59216	2.95606	2.41954	3.65421	3.29572	2.4489	3.84097	4.13422	3.39506	3.14241	2.08406
FMR1	-0.0383955	4.71809	3.08066	3.27352	4.20477	3.62994	4.32841	3.13422	3.87774	4.25172	3.82375	3.54102	4.7666	4.58676	3.60644	3.90014	5.31723	4.17552	4.21878	3.77716	4.51159	4.60288	4.68032	3.45549	2.28983
PIM2	0.0797177	4.30086	4.69877	4.23802	3.81455	4.46728	3.77294	3.15381	7.98396	3.71918	2.86987	2.91839	7.1814	6.20984	3.62877	4.09677	6.1981	4.59395	3.56803	5.53294	4.47508	2.84197	6.01078	5.42895	3.93923
SCML2	-0.0114193	2.79077	2.90111	2.72028	3.5435	3.43296	0.0703893	1.82375	0.356144	4.02503	2.01792	3.1811	0.201634	1.62293	2.20477	2.62994	3.08576	0.124328	0.124328	1.56071	3.52732	2.01078	3.34341	4.83744	3.07039
SLC35A2	-0.0369936	4.60466	4.11603	4.34483	4.0027	4.68818	4.38474	3.41819	4.03034	4.17792	3.99548	3.60644	4.23726	4.41549	3.93168	4.48091	4.08321	4.47508	4.74362	4.79181	4.97728	4.29572	4.58436	5.75328	2.848
PQBP1	0.129254	6.58331	6.52873	6.40582	6.87073	6.99582	6.59649	6.64645	7.03958	6.15137	5.96255	6.62892	6.42794	7.24821	6.83643	6.04133	7.21626	6.58135	6.36877	7.67856	6.88044	5.97315	7.10119	8.21057	6.19121
EMD	0.502098	0.31034	5.75889	5.49793	5.5404	6.27854	5.9607	5.47054	5.57198	5.64789	5.86493	5.05918	5.72	5.66135	6.16832	5.78293	6.75582	6.08979	5.8632	5.52888	6.45796	7.2446	5.47573	6.13196	4.73715
TAZ	-0.145359	5.09592	5.16229	4.60229	5.24565	4.74362	4.43296	5.05702	4.29205	4.89869	5.51979	5.04789	3.60644	4.32193	4.79233	5.29793	4.7845	5.33163	6.08491	3.82171	6.04658	5.18626	4.78607	3.7666	4.13504
PGK1	-0.181994	8.21868	8.17148	7.72601	7.53559	8.9056	8.50259	5.6241	7.26003	8.19741	8.21864	7.09022	7.82547	7.65399	9.13324	8.13766	8.14715	8.08023	8.15259	7.90761	8.5838	8.49725	7.38232	6.69363	6.43112
GATA1	0.408248	0.0565835	0	0.201634	0.0976108	0.847997	0.536053	0.722466	7.45902	0	0.0703893	0.0143553	7.55651	6.53278	0	0.0565835	6.71891	0.163499	0.0976108	9.43436	0.0285692	0	7.48486	7.87952	4.91743
MAGT1	0.0895343	4.80064	3.38267	3.93923	3.68818	4.2555	4.47054	2.31325	3.9486	4.79597	3.95513	3.9241	4.23649	4.33557	3.56316	4.77347	4.20633	3.8953	5.15056	4.78555	4.45615	5.14771	4.90159	3.80116	3.20945
SMS	0.0573898	5.75889	6.25852	5.98071	6.21257	6.97991	7.06803	5.58496	6.31741	6.53091	5.96139	5.56346	6.89215	6.91982	5.44128	6.34908	7.0177	6.85649	6.28337	0.0143553	8.0326	8.21568	7.46041	7.61949	6.11312
UBL4A	-0.05831	5.12184	4.926	4.69655	5.01167	5.63285	5.57501	3.41007	5.0018	5.03254	4.50335	4.20711	5.26003	4.60585	5.02636	4.65134	6.37712	5.41177	5.28429	5.34234	5.96602	5.21801	5.79597	4.02945	3.66448
CD99L2	-0.24262	5.15015	4.30889	4.58195	4.82426	4.94298	4.62293	3.17473	3.34056	4.90785	4.91886	4.14568	3.49953	3.59096	5.27053	4.98368	4.09255	4.17871	5.21179	3.90977	5.40224	6.1819	4.68201	2.64616	2.67356
EEA1	-0.312066	2.76765	1.56071	2.23879	2.90111	2.92979	3.19535	1.13093	2.71149	3.0054	2.27798	1.74416	3.5097	2.43829	1.78241	1.75702	2.33056	1.43829	2.9855	2.08406	2.1177	2.72465	2.55827	1.42223	0.887525
RP2	-0.172394	3.9782	3.38267	3.58616	3.96993	4.0045	3.79805	2.93923	2.81967	4.00988	3.89821	3.3978	3.36457	3.60881	2.95047	4.13914	3.23266	2.93734	4.62877	4.36667	4.23419	2.57046	3.61117	3.6017	2.85798
JADE3	0.187283	1.82782	1.71809	1.49057	1.45418	3.0268	3.07211	0.400538	2.61824	2.99458	3.52982	1.69153	3.24489	3.22959	0.713696	2.33628	3.29866	0.400538	3.0635	3.48027	3.41684	2.37573	3.30159	2.64386	1.5008
CDK16	-0.0234299	5.82171	5.42223	4.58496	5.27128	6.25134	5.73958	4.88606	5.21296	4.93923	5.80374	4.45549	5.12184	5.4822	5.51381	5.25323	5.7126	5.35438	5.43029	5.75409	6.76208	5.86171	6.12722	5.8475	4.26078
USP11	0.175343	4.50843	4.35473	4.20789	4.6865	4.65592	4.70929	3.66562	5.15097	4.69042	4.65363	4.34837	4.80993	5.26529	4.26529	5.03474	5.44394	3.49442	3.99548	6.12164	4.92125	4.67129	6.17433	6.20945	3.53854
HTATSF1	-0.0729814	5.76713	5.54504	5.66078	5.6314	6.17812	5.83213	4.35473	5.07468	5.77268	5.98345	5.20984	5.72083	5.48478	4.51979	5.81147	5.2891	6.3194	6.04002	5.52732	6.37955	5.91409	5.53201	4.86047	5.37191
TIMP1	0.418409	6.98766	6.4441	6.47249	5.9743	7.32157	6.95012	8.22853	6.455	6.02989	7.05615	6.77834	6.41143	8.03364	7.93151	6.70224	7.79136	6.02303	7.92345	9.08542	7.19545	9.19084	8.10313	11.1906	7.3378
PIN4	-0.302295	4.57833	4.61176	4.2765	4.18666	5.05875	4.39575	5.17273	4.34483	4.28983	4.01881	4.40803	4.04701	4.95745	4.16591	4.50335	3.65764	4.96993	4.51854	4.56803	4.36177	4.95838	4.07895	4.89772	3.15866
PORCN	0.364678	1.67356	2.15056	1.68257	2.05311	2.36177	2.61824	1.83996	2.91648	2.97636	2.93168	2.80735	2.40327	1.81147	1.5656	2.37573	3.46205	3.1635	3.2032	2.55827	4.13422	6.04571	2.99277	2.52857	2.02857
MAGED2	-0.0243414	5.47735	3.86493	3.84499	4.88655	4.65076	4.62761	3.8953	5.68313	5.30195	5.68426	4.09085	5.87036	4.81865	4.94064	4.96394	4.42089	4.17632	5.99955	6.63474	6.37591	6.25267	6.32769	7.39232	0
RBM3	-0.102832	8.07714	7.43137	8.07617	8.15977	7.88295	6.28983	7.79168	7.24536	7.06738	7.63597	7.60162	6.06996	8.80429	7.82712	7.85935	6.50875	7.93793	8.16179	8.60637	7.29866	6.52466	7.0782	7.51791	7.72758
CENPI	-0.134192	3.25399	2.73552	2.36457	2.89918	3.21568	3.72356	1.54597	1.95606	3.12433	2.84197	2.14405	3.02857	2.65306	1.70487	3.03914	3.17313	3.39643	3.49825	2.07724	3.5373	4.44029	3.23726	2.45418	1.12433
PBDC1	-0.0876483	5.3345	5.04002	5.24336	4.2555	5.65249	5.51916	5.0027	4.46401	5.25475	4.53978	5.15543	5.05918	4.87627	3.62877	4.81404	5.38681	5.93899	5.33985	5.07082	5.40531	5.53699	4.82629	6.09866	4.23573
GLA	-0.0990961	5.58105	5.86962	5.88874	5.44758	5.65821	5.23458	5.59813	3.47897	6.05983	5.69377	4.67469	3.80012	4.62644	4.28021	6.29811	5.61618	5.48478	5.00045	5.64847	6.1416	5.24603	4.95606	6.18309	5.42626
ARMCX3	0.0440176	4.61883	3.45681	3.49057	3.93546	0.176323	3.69933	2.43563	3.91073	4.2854	4.14241	4.19061	3.81044	4.39985	3.74953	4.18428	3.36457	3.9279	5.20046	4.05398	1.01436	5.3147	4.84649	2.774	2.88362
BEX4	0.371025	2.57046	0.0976108	0.0976108	0.0285692	0.137504	0	0.0976108	7.55013	0.137504	3.80632	0.475085	7.16812	6.05246	1.9486	1.21412	6.42509	0.475085	5.41819	4.53045	0.0840643	4.76713	5.38991	7.30934	1.91839
NDFIP2	-0.202912	4.09845	3.4489	3.95327	4.33485	3.79286	0.124328	3.53107	1.33342	0.790772	2.61353	4.2765	2.38957	4.90737	3.32193	4.38681	5.20789	3.29719	3.15543	1.13093	1.05658	3.97361	3.04439	4.02148	0.526069
TNFSF13B	0.144121	2.43829	3.31759	4.70653	5.73091	3.16189	3.23726	5.16832	0.400538	5.2211	5.58406	3.12433	0.918386	0.226509	2.30451	7.11718	3.85898	6.44427	7.6946	2.81762	6.9542	0.176323	6.75649	1.80735	5.04089
FNDC3A	-0.0211577	3.79077	2.73552	4.15137	4.2817	4.15866	3.84599	3.46205	4.12928	4.45878	2.62994	3.30743	4.57228	3.86096	1.88753	3.60644	3.82782	3.89821	5.25512	3.1375	4.02503	4.64501	3.9279	3.10936	3.43696
CDADC1	0.177464	3.52982	2.79909	3.6311	3.20163	4.32625	4.85798	2.7845	3.34908	3.05137	2.90881	3.32193	3.26303	3.41278	2.32481	2.77189	3.11603	4.62527	4.91025	3.80116	4.67129	3.31759	4.00899	2.77821	4.51854
STK24	0.508171	4.43296	4.20085	4.97039	5.70432	5.05007	5.12928	4.2426	6.10119	4.54782	4.6094	4.9991	6.48704	6.25965	5.3107	5.48704	5.60733	5.92101	6.9905	6.57077	5.93522	5.51854	6.27445	5.35085	5.01123
DNAJC3	0.0864364	4.14323	3.54226	3.98732	3.56803	3.42895	3.82069	2.58976	3.52857	3.70819	3.64386	3.96162	4.44361	3.48027	2.43029	4.80012	3.70155	4.11936	5.5404	4.01792	3.96162	3.30012	4.12184	2.80529	3.96255
UGGT2	0.0594276	2.42223	0.0703893	3.35191	3.82883	3.58496	0.0143553	3.22033	3.55459	0.0426443	3.09085	3.78346	4.0197	3.94953	2.17313	4.73173	2.76765	0.443607	0.111031	2.33914	4.29499	4.8212	3.59574	3.30451	0.464668
ARHGEF7	0.152631	4.77768	3.81967	4.58075	4.30889	4.56742	4.53294	3.7866	5.03122	4.35332	4.35755	4.24945	5.29462	4.63633	4.26379	4.58135	4.38198	4.54226	5.87357	4.62936	5.29278	4.66903	7.08375	4.0365	3.72356
PARP4	-0.0897842	4.93026	3.65191	5.27016	5.02636	4.60288	4.18269	4.14975	4.87971	4.00988	4.62936	4.14241	5.4663	5.04701	4.13832	5.95117	4.65019	4.61353	6.22882	3.69599	4.53169	4.91934	5.44261	2.7866	3.60526
SUPT20H	-0.0250446	5.14282	4.53107	5.35579	4.80581	5.30415	5.47606	5.34731	5.88631	4.33557	5.02503	4.33485	6.20222	6.0072	4.1235	4.89336	5.34873	5.8902	6.79286	3.38128	4.74201	5.56285	6.15886	4.99639	4.24717
MRPS31	0.00570196	4.10182	3.97636	5.02768	4.36807	4.90593	4.64097	5.72083	5.11187	3.56194	4.26828	4.40735	5.67271	4.92267	2.89142	4.34483	4.58135	5.01614	5.37469	3.65421	4.60763	4.49249	4.98504	5.41414	3.90593
SLC25A15	-0.25883	4.53232	2.99458	4.18349	3.68145	3.76235	4.61883	2.87184	4.46532	3.25096	4.43896	2.17632	4.65707	4.85	2.7866	3.85997	4.85549	3.29278	5.24907	3.38819	3.30597	3.96162	5.13175	3.50208	0.604071
KPNA3	0.0639034	4.32984	3.84298	4.72137	4.05918	5.15785	4.96301	2.98732	4.58976	4.62877	3.5472	4.20163	5.77056	4.57228	2.34767	3.78346	5.01837	5.00809	5.58916	5.20594	5.07682	4.90111	4.64443	3.57773	4.11187
RGCC	-0.0664584	3.66903	0.948601	2.93546	3.33914	2.16993	0.978196	2.98185	0.275007	4.26003	4.13586	2.96717	0.263034	1.83592	0.83996	3.34341	1.19535	4.96532	0	0.731183	3.904	1.88753	1.72683	0.641546	3.91743
VWA8	-0.0105674	2.69599	1.50589	3.06005	2.75275	3	3.19535	2.37573	3.34056	2.91648	2.71149	2.69153	3.97453	3.28836	1.05658	2.854	3.60763	3.0036	4.26003	2.1177	2.40871	2.68482	3.36737	2.28983	1.70044
KATNAL1	0.0674811	1.90689	1.08406	1.76129	2.31034	2.33342	2.81147	1.40599	1.95977	1.31615	2.45943	1.72247	2.80529	2.28688	1.39506	2.44626	1.95977	3.08406	3.48671	1.28096	2.11103	3.54844	2.44626	1.25096	0.823749
INTS6	-0.234345	4.61176	3.35755	4.28983	4.06091	4.52168	4.02326	4.23955	4.29278	4.07724	3.10601	4.15381	4.72683	4.37156	2.70708	4.14241	4.18507	3.91169	5.5157	3.73552	3.8125	3.85798	4.11353	3.46205	3.25852
DHRS12	-0.0452023	2.92029	1.9855	2.41954	2.9279	1.23879	1.87971	3.34483	1.90304	2.97269	3.97361	1.8953	1.852	2.23266	2.54844	4.41819	2.37573	2.69599	4.45943	2.66448	3.05832	2.07382	2.0036	1.33914	1.42761
TSC22D1	0.385131	4.0635	1.08406	2.76765	3.43029	3.0197	4.35826	1.77821	5.54133	4.53294	2.68706	2.7845	6.14364	5.42727	0.321928	3.87283	5.47897	4.30012	5.53387	4.28096	3.31759	5.07682	4.92979	5.50398	4.7252
CLN5	0.270695	3.48027	2.87971	3.91934	3.53978	3.07039	3.27501	3.05311	3.37573	3.18269	3.04614	3.45154	3.77926	3.35332	2.46205	4.52982	3.90593	4.14486	4.37156	3.99186	3.0072	4.35332	3.56438	2.96532	3.79909
MGRN1	-0.149794	5.24031	4.87283	4.80632	5.03782	4.92267	4.19849	3.19377	4.43296	4.41481	5.44328	4.80632	3.89142	4.96255	5.04483	5.42257	4.31252	4.85499	5.93239	4.38612	5.15704	4.8485	5.44989	2.95047	3.87381
ZNF629	0.119536	3.79597	3.13914	2.53107	2.70044	2.11103	2.14731	2.60644	2.88362	3.02148	3.13914	2.93168	3.0197	3.46597	3.43829	3.03386	3.0268	2.78031	3.71039	3.50843	3.38681	3.09085	3.26003	2.5656	2.90881
TRADD	-0.273641	4.02591	3.61824	3.24793	3.0054	3.19849	3.05832	2.33914	2.70487	2.78869	3.59335	2.40054	2.24184	3.4957	3.30889	3.68818	2.67582	4.16511	4.48543	2.17313	3.03034	3.77294	3.76129	1.93734	1.94111
HSF4	-0.0162661	3.92695	2.26003	2.04963	2.37573	1.68706	1.1375	1.13093	2.08746	1.81967	2.27501	3.13586	1.9855	2.0321	1.63691	2.39232	3.4489	4.80735	4.04089	0.516015	3.29572	3.38957	2.25399	3.47768	0.807355
CORO1A	-0.298746	8.47123	8.98202	8.73742	8.83058	9.30202	7.62198	8.71091	7.0072	8.02109	8.50311	9.38262	6.20359	7.20721	9.45115	7.46115	5.70598	9.43536	9.71872	7.33735	9.19044	2.72465	5.77056	4.81455	8.57626
MAPK3	0.433634	4.68818	4.35473	3.90111	4.61706	3.73444	3.81558	2.88947	4.48736	3.32337	5.39163	4.54967	4.2032	3.69153	5.84373	4.89142	4.18587	5.40803	5.72955	5.0237	4.67582	5.65191	5.09339	4.27947	5.41886
PHKB	0.0877687	5.15583	3.75168	4.41143	4.46597	5.3978	4.61412	3.02148	4.74792	4.34554	5.34837	4.07895	4.85499	5.38267	3.82782	5.07895	4.22651	5.6907	5.86121	5.07168	4.43229	4.90881	5.72055	3.32193	4.36036
LYRM1	0.232133	3.53978	4.46923	4.7666	4.71864	3.28244	3.25701	5.04701	3.5656	2.28983	3.62994	4.37295	3.83491	4.48993	4.15056	3.6427	3.37295	4.60288	5.10308	3.89918	4.10936	5.74308	3.41007	4.27053	5.47151
NUTF2	-0.177557	6.83124	7.00068	5.90497	5.99729	7.67955	7.08672	5.87971	6.46271	6.75208	6.73525	5.22997	6.73349	7.03012	5.85748	6.12701	6.98402	7.38241	6.70002	6.13545	5.76871	6.93286	6.89227	7.17383	5.55949
NUP93	-0.228689	6.48043	6.03804	5.904	5.90135	6.87615	6.60925	6.36894	6.05983	6.09466	6.31524	5.81404	6.39849	6.33575	5.29389	5.98778	6.46091	6.56621	6.393	5.96648	6.28762	6.0268	6.28188	6.83023	5.30305
CENPT	-0.267887	5.67835	5.80193	5.07168	5.37365	6.00921	5.05658	4.65191	5.32048	4.83238	5.03078	4.86542	4.75596	5.60792	5.04045	5.48832	5.43696	5.95722	5.49089	4.04789	5.45319	5.08279	6.10455	5.92979	3.90689
NFAT5	0.0613449	2.31325	1.42223	1.5656	3.0321	2.37851	2.95606	0.641546	2.37016	3.67243	2.55336	1.95606	2.7761	2.79909	1.83188	2.70266	2.9241	2.03914	3.35473	2.01436	1.8953	3.44228	3.5435	1.81558	0.887525
LONP2	-0.255142	4.60585	3.83086	3.63227	4.07211	3.61235	4.09001	3.27798	3.58376	3.59813	4.15866	3.32048	3.85499	4.40803	3.82171	4.1152	3.7939	3.72574	4.58015	3.30159	3.79701	4.95745	4.14405	3.19535	2.79077
N4BP1	0.138447	3.46728	2.8679	2.66903	3.37156	3.98641	3.68594	2.8953	2.94111	4.0505	3.51475	2.94673	3.64616	3.9241	3.24793	3.52105	3.7761	4.19771	4.21023	3.19849	2.87184	3.19849	3.65764	3.21101	3.02857
ARL2BP	0.278269	4.8679	4.03738	3.24031	4.45483	5.05398	4.90497	3.40599	4.66846	4.38267	4.03562	5.0505	4.71754	4.82579	4.17951	4.11103	5.0027	4.49889	5.83036	4.37226	4.72083	5.82273	5.33842	4.51096	4.36807
DHODH	-0.39171	3.63343	3.30159	3.58616	3.28244	3.70819	3.96347	2.51602	3.25852	3.51475	3.27053	2.16027	3.63459	3.83693	2.85798	3.0054	2.79286	3.51602	3.70598	2.94298	3.90785	3.76977	3.82171	2.60407	1.26303
CTCF	-0.299126	5.42794	5.10936	5.17153	5.47054	5.55182	5.49378	4.30451	5.03518	5.24336	4.91456	4.59574	5.54936	5.13709	4.75061	5.12639	4.71699	5.27575	5.64962	5.20203	4.47703	4.2032	5.72982	4.96809	4.60051
ACD	-0.283531	4.86047	4.79025	4.51728	4.71699	5.20789	4.75007	4.02326	4.774	4.46271	5.01436	4.27501	4.83845	5.02591	4.94251	4.60348	3.61589	4.48285	5.44162	3.88753	4.95977	5.38716	4.78869	3.23113	3.81352
POLR2C	0.0736465	5.9528	5.47606	5.58376	5.3345	6.44178	6.17652	4.32769	5.64386	5.67044	5.50716	5.48961	5.93899	5.87061	5.69905	5.24108	6.38543	5.74846	6.4522	6.39215	5.65964	6.50605	6.53076	6.06458	4.76765
USB1	-0.120239	5.71287	4.8089	4.51916	4.58976	5.68594	5.22033	3.33771	4.92029	4.12267	4.75007	4.33628	5.38405	5.37955	4.12433	4.61648	5.28281	6.08194	5.78319	4.45022	4.90593	5.24184	5.478	4.14078	4.09255
CYB5B	-0.0286553	6.17413	6.05961	5.82094	6.04374	7.0433	6.80645	4.95652	5.27165	5.95675	6.31234	5.49474	6.13627	6.08831	5.46728	6.29811	5.92505	6.50016	7.20535	5.97315	6.05137	6.89821	6.37452	5.61206	5.58976
NME3	-0.359264	5.76022	6.36527	4.59872	5.01391	3.16189	3.33056	4.70155	2.33056	3.73552	5.28577	3.7126	1.38405	2.20477	5.36107	5.36036	5.56529	4.95977	2.44095	0.704872	2.23879	5.51223	4.1035	1.59932	3.89918
PSMD7	-0.206762	6.93628	6.88277	6.89215	6.41515	7.5462	7.20075	5.82757	6.78777	6.54844	6.94918	6.52356	6.6872	6.87283	5.9364	6.91253	6.82031	7.28355	7.08683	6.99876	6.39883	7.41701	7.17263	6.35931	5.93876
SETD6	-0.246458	3.47249	3.90304	3.66107	4.46467	4.87725	4.0027	3.97177	0.545968	4.42223	3.33771	3.35191	1.35614	3.28983	2.94298	3.68594	4.52982	4.0268	3.5097	2.7761	2.58015	3.28392	2.852	4.16189	2.4957
SLC38A7	0.0121785	2.80116	1.91456	2.38957	2.70487	3.08916	2.51349	2.08066	2.0036	2.96901	2.72901	1.848	2.53605	3.2032	2.53605	2.89724	2.46989	3.76447	2.67582	2.27501	2.60881	2.73552	3.26153	2.65076	1.53605
VAC14	-0.128777	4.75328	4.24565	4.0321	4.06178	5.26379	4.59276	4.26379	3.97728	4.30232	4.39575	3.56438	3.9542	4.59096	3.8953	5.02459	4.39849	5.25776	4.37226	4.21645	4.3067	4.56194	4.46205	4.38474	3.83592
TANGO6	-0.277632	3.3978	2.04963	3.11936	2.68257	3.00899	2.40054	1.27501	1.93357	2.50843	2.11103	2.17313	2.62059	3.04264	2.3978	2.83188	2.36457	2.77821	2.87774	1.79077	2.42223	3.52982	2.89336	1.96717	1.3505
COG4	-0.183753	5.1102	4.69377	4.92125	5.16068	4.41346	4.87431	4.72356	4.89385	4.34979	5.67892	4.25399	5.20438	4.98231	4.57107	6.09529	3.72465	4.68706	5.09212	4.89627	4.19456	6.20477	5.28762	3.35473	3.92125
SLC7A6OS	-0.160641	4.02591	3.73769	3.82375	3.82069	4.2854	4.33271	2.46467	3.80839	4.22419	3.60407	3.21723	3.8846	3.8748	3.32337	3.92979	3.69822	4.31759	4.56377	3.35473	3.70487	4.06867	4.06953	2.43829	3.52982
SLC7A6	-0.279241	3.9486	3.64155	3.5435	4.15381	4.62936	4.47314	3.22959	4.52168	4.45154	3.54473	3.21257	4.67356	4.4019	3.59096	3.74416	3.32769	3.99095	4.02237	3.40463	3.25248	3.31759	3.4019	2.33056	3.87578
PLA2G15	-0.0593276	4.53419	3.80012	3.38957	3.5656	3.43829	3.47768	3.22805	2.5008	3.04089	3.39094	3.78555	2.30451	4.33628	4.91791	4.37782	3.04789	4.28983	3.90689	3.42492	4.63343	4.49697	3.16189	2.86196	3.12928
WDR59	0.0176657	4.49378	4.42559	4.01792	4.19928	5.24375	4.78869	3.50716	5.20006	5.1643	4.97591	3.24184	5.34554	5.33235	4.17552	4.36387	5.12516	4.78503	4.83188	4.04089	4.44095	4.87922	6.11728	4.76871	3.33771
MON1B	-0.303291	5.01302	4.33485	4.8334	4.98687	5.11728	4.77558	3.69042	4.97085	4.46663	4.61941	3.6427	4.34696	5.16993	4.48414	4.8505	4.03826	5.20359	5.74524	4.61883	4.46728	5.0505	5.01926	3.36877	2.9982
CMC2	-0.0626524	6.43329	6.5509	6.4645	5.93334	6.88655	7.39283	5.62117	6.19417	6.1467	5.87135	5.73769	6.9404	6.22091	5.69683	6.13402	6.77624	7.26097	6.1633	6.49346	6.11082	7.55781	6.95408	6.69153	5.57531
AXIN1	0.198451	4.58616	4.09255	4.22574	3.93546	3.32625	3.06178	2.74201	4.69488	3.43829	4.5741	3.51223	4.55213	4.57289	4.56925	4.91073	4.53294	5.14078	4.5404	3.78973	4.47119	4.38681	4.99322	4.12184	3.69153
HCFC1R1	0.061217	4.70487	5.39951	4.87283	4.30451	4.58316	4.05137	5.83086	4.31107	3.16189	5.32984	3.6893	4.1375	4.63401	4.97591	4.92267	4.33199	5.66278	5.0045	4.38059	4.50462	6.98959	4.80478	4.74093	4.7939
NPRL3	0.195653	3.83996	3.93452	3.67469	4.02768	4.04527	3.23573	3.63459	5.45746	2.90111	4.31904	3.10936	5.60763	4.16993	4.45022	3.61941	4.69377	4.18824	4.25096	3.86493	4.31542	4.71973	5.24336	4.23573	3.51223
MPG	-0.126627	6.61162	6.89081	6.19022	6.45845	5.43929	4.48349	5.71836	5.75435	3.98185	5.8296	6.98527	4.77768	5.65478	6.47752	6.72137	5.33128	6.42206	7.21189	4.29572	6.69988	6.65635	5.37816	4.82985	5.90641
HSDL1	-0.0449406	3.36597	2.9982	3.15704	4.26303	4.04177	4.23419	2.23573	2.854	4.57894	3.37851	2.74846	3.58736	3.44361	2.98368	3.52607	3.74416	3.72137	4.38819	3.36877	3.853	4.18507	3.70044	3.37851	2.22651
TAF1C	-0.456825	5.45582	5.05745	5.22226	5.23228	5.47768	5.31361	4.62293	4.96671	5.30889	5.14405	5.10518	4.68257	4.79338	4.50271	5.14364	4.97039	5.65564	5.41886	3.14731	5.25588	5.0751	5.46663	4.49506	3.19061
NAGPA	-0.152137	3.38128	3.9607	3.99729	4.01078	4.37712	2.54102	3.36177	2.55827	2.57289	4.05918	1.89918	2.65535	3.60999	3.22651	4.14568	3.10769	5.67384	3.06005	2.61824	3.70377	3.06695	3.71039	3.16832	2.92029
COTL1	0.105058	8.1355	7.37608	6.68832	7.81564	6.30451	8.11915	6.6295	7.76845	7.09064	8.80245	5.92647	8.22313	6.34749	7.50486	7.81609	7.83832	8.40676	7.63467	7.5093	6.57016	7.26585	8.06399	7.48535	8.08076
USP10	-0.0203101	5.80116	5.00225	5.45352	5.6014	6.28318	6.43296	4.16832	5.62965	5.56986	5.46499	5.16872	6.40803	5.96717	5.08916	5.53356	5.96901	5.80219	6.01948	5.67751	5.65277	5.73796	6.28429	5.36947	4.75916
TSC2	-0.152828	5.35438	4.87283	4.73444	5.05224	5.15704	4.1334	4.90737	4.92552	4.18428	4.88704	4.19771	4.21179	5.1177	5.05875	5.00809	4.75061	5.68482	5.29829	3.83693	4.98504	5.05137	6.07489	4.38957	3.99639
ZNF500	-0.166365	3.04264	2.46205	2.34199	2.56316	2.46728	1.60881	1.33914	2.21723	1.852	2.66448	1.69153	2.36457	3.12433	2.51096	2.65306	2.42223	2.97085	2.91265	2.10434	2.43029	2.488	3.50843	1.18269	1.27501
NME4	0.044005	7.50835	7.05322	5.78084	6.05376	6.03518	6.50064	6.01859	7.23141	6.65878	5.8495	5.63894	6.63822	7.54612	6.72724	6.72846	7.9814	7.01112	7.16882	6.35544	5.59872	8.04368	7.59141	6.73647	5.9991
ABCC1	0.217322	4.92315	4.25096	3.49697	4.88606	4.71809	4.64904	3.17951	4.51412	4.98277	4.14486	3.92979	4.35896	5.70044	3.63807	3.66448	5.06996	4.9528	6.21994	5.12019	4.27947	3.99548	5.67892	3.59216	5.53356
NOMO3	-0.240913	5.52042	3.78031	3.90497	3.56803	5.34731	4.21645	2.22959	4.14241	4.23879	4.39712	4.13914	4.42761	4.25475	3.91552	4.72629	4.49953	4.36387	5.19889	2.28688	4.76607	5.30342	4.34199	2.7866	2.6017
LMF1	0.1196	2.66903	2.48285	2.10098	3.08916	0.85599	1.52105	1.76553	1.19535	1.83188	2.73985	2.80735	0.594549	3.05485	3.05832	3.04963	1.94486	1.74846	4.08491	1.72247	3.14893	3.97545	2.53605	1.85599	1.8953
CIAO3	-0.0500194	4.55152	4.56255	4.34767	4.04876	3.30889	4.45615	3.35473	4.01792	3.51475	4.21645	3.69265	4.09677	4.0798	3.83289	4.01614	3.84499	4.80323	4.96394	2.88362	4.50271	4.30597	4.83491	4.22959	4.0018
MTHFSD	-0.26604	3.98914	3.27202	3.76977	3.89918	3.9855	3.76022	3.38405	3.64847	3.95884	3.65992	3.43162	3.70155	3.78973	3.45154	3.9542	3.01436	4.26529	3.904	3.14241	4.32841	3.90304	4.16189	3.20633	2.51602
CLCN7	-0.429151	6.53714	5.59723	5.91695	6.96682	5.86518	4.54164	5.07082	4.38612	5.50875	5.9486	5.30488	3.71918	4.6565	5.3844	7.1236	4.22959	6.49426	5.0321	3.29572	6.67101	4.34625	5.30488	4.13175	3.68594
HAGHL	-0.29495	4.66448	5.63662	4.82273	4.56255	4.41414	3.63459	3.37016	4.6241	2.20163	4.43696	3.01257	3.25701	4.42156	4.01078	4.94953	4.99503	5.90713	5.25475	1.68706	5.56133	4.5735	4.05745	3.46336	2.10098
ANTKMT	-0.296648	4.52356	4.85748	4.3067	4.07895	4.02148	2.16672	4.66334	4.25475	2.12763	3.9542	2.75489	3.4489	4.10936	3.92029	4.25323	5.52888	4.99639	4.20006	1.89142	3.72137	4.45943	3.46858	3.65764	2.22959
SLC7A5	-0.223673	5.96116	6.30561	6.79533	6.00675	7.75181	5.81506	6.15704	7.58721	5.28725	4.53543	6.50303	6.88984	7.54913	7.53232	6.26529	5.90014	6.40071	7.32912	6.80903	6.36755	6.96209	5.98391	5.56255	3.23113
METRN	-0.208655	3.52231	5.04876	2.90111	0.485427	2.35614	1.72247	2.14405	2.38957	1.85997	2.61589	2.47508	1.62293	3.15866	1.83592	1.88362	4.30961	4.81916	3.71809	1.66903	3.07895	4.01792	2.01792	1.96717	1.02148
FBXO31	0.0526884	2.91456	2.7845	3.29572	2.88166	3.83592	3.26454	2.36457	3.43296	3.38267	3.34625	2.45418	3.04614	4.24793	4	2.97453	3.21101	3.33628	3.29866	2.21101	2.95977	3.94298	4.2426	3.11103	2.31615
STUB1	-0.396297	6.74685	6.89736	5.87431	6.0148	5.60496	5.29793	5.72874	5.54442	5.16631	6.1817	4.96901	5.42358	5.69209	6.1471	6.20965	5.96648	6.472	6.12722	4.88215	5.81967	5.92458	6.08428	5.65076	5.23688
NUBP1	0.167984	4.36597	4.96717	4.59991	5.04789	4.50335	4.39094	5.02636	4.56499	3.37851	4.52669	4.23496	4.66278	4.53605	4.49825	4.39232	4.46401	4.65363	4.93923	5.42391	4.8125	5.23304	5.53512	5.32553	4.36877
UBE2I	-0.0855361	7.09729	6.92172	6.36352	6.83188	6.64342	6.21335	6.28337	6.29701	5.78503	6.98174	6.09043	6.14547	7.17233	7.00191	6.90412	6.87774	7.36868	6.85337	6.21043	6.29186	6.52278	7.24403	6.78542	6.05094
EEF2K	-0.132186	4.00988	3.44228	3.17313	3.70708	3.91169	3.59096	1.81147	3.90111	3.16672	2.848	2.87774	3.61471	4.84649	2.09085	3.0036	3.81865	3.51854	4.14323	3.11603	3.93452	3.9982	4.28318	2.58496	2.61824
CAPN15	-0.403092	5.67327	5.51885	4.68538	4.76924	5.06953	4.64443	4.29646	5.02192	4.24031	4.83188	3.33628	4.76022	5.15623	4.69209	4.89627	5.09719	5.99707	4.86839	2.89724	3.91361	4.43496	5.57137	3.91169	3.73877
PIEZO1	-0.273376	8.10685	7.35517	7.14639	6.29682	7.84254	8.54701	6.20183	7.63467	7.83592	7.31886	6.35403	6.91934	8.01374	6.79246	7.44303	7.16682	7.54597	7.17493	6.30979	6.77162	6.82413	8.87768	6.30305	6.54736
GSPT1	0.0255378	6.16792	5.58526	6.01212	6.10706	6.74779	5.74927	4.64501	6.31488	5.41312	6.06738	5.46761	7.31877	6.86703	5.3512	5.73308	7.17273	6.20945	6.31578	6.39985	6.10287	6.76514	6.95907	6.26754	4.5735
ZNF174	0.027759	3.61353	2.78241	2.22342	2.72247	2.90497	2.57773	1.774	2.82375	2.47768	3.01614	2.86394	3.02503	3.42895	2.67129	2.65535	3.32337	3.20789	2.99639	3.34625	2.96901	1.96347	3.37434	3.1127	2.46728
CLUAP1	-0.00783405	3.80632	2.78869	3.22188	3.42223	3.58496	2.81558	3.20006	2.53107	2.31615	2.94486	3.46597	2.72028	3.848	2.98003	2.79077	3.22033	3.52732	3.3147	3.09424	3.07895	3.55704	3.89433	4.10098	2.69377
UBFD1	0.198344	4.03738	3.29719	3.32193	3.43829	4.71754	3.59574	2.42492	4.09001	3.50843	3.34341	3.4489	4.53419	4.774	3.25399	3.56925	5.16952	3.80632	4.05745	4.02414	4.09424	4.8748	4.79442	4.08066	3.10769
EARS2	-0.362285	4.7366	3.81044	4.32265	3.80632	4.27724	3.45022	3.75916	3.67582	3.22805	4.08916	2.64847	4.18982	4.87971	3.63227	4.05137	4.26153	4.11437	3.7761	3.56071	4.55949	4.44824	3.58616	4.12928	1.96717
ELOB	-0.239777	8.58665	8.79986	8.24997	7.13391	8.52986	7.69244	8.95957	7.98077	6.6768	8.42622	8.02359	7.64032	7.85786	7.77195	7.77446	7.4475	8.94489	8.18542	8.22901	8.35063	8.67913	8.44522	8.23007	7.234
GGA2	-0.388282	6.732	5.24869	5.73742	6.20594	5.26491	4.67638	4.48864	4.71973	4.97085	6.61765	4.15543	5.25285	5.25399	5.39712	6.49777	5.26978	5.78529	6.10434	3.69042	6.17233	4.76288	5.23266	4.26003	3.76765
CPPED1	0.450765	3.06005	0.0143553	4.32697	2.69377	3.64039	2.38681	4.48285	5.73715	2	4.22882	2.89336	5.27798	4.52042	4.35896	4.02945	4.55213	3.78031	4.28466	5.80787	3.26754	2.29572	4.86691	3.14568	5.27501
HMOX2	-0.13711	4.93357	5.73796	5.4591	4.66505	5.63488	4.67469	3.95327	4.41278	4.49313	5.48575	4.47184	4.30889	5.25172	5.71754	4.93168	5.46041	5.3906	5.20594	5.10978	5.26866	6.04549	4.37086	4.64501	4.17473
DNAJA3	-0.325428	5.90617	5.41177	5.81634	5.11562	5.61324	4.9222	4.19928	5.72901	4.76022	5.5373	4.93026	5.6585	5.78973	5.47541	5.39746	5.54504	4.852	5.99073	4.97774	5.70929	6.01837	6.05224	4.53481	3.17632
BFAR	0.0878136	5.30524	4.77979	5.05875	5.62439	5.26828	4.40463	4.76871	5.08619	4.56499	5.19377	5.0691	5.38647	5.70736	5.05788	5.08364	5.33163	5.33128	5.36001	5.39883	5.10266	5.92386	5.48446	5.22651	4.45549
RBL2	-0.454753	5.13134	4.23726	4.99639	5.42593	4.82222	4.7939	3.91743	4.24184	5.10643	4.76924	4.77979	4.3799	4.44758	4.06953	4.17951	3.97085	4.90111	5.33414	3.17473	4.83895	4.84699	4.69711	3.80529	3.19692
QPRT	-0.0400335	7.3482	4.08236	2.56071	5.61912	5.93334	5.25134	4.18507	5.28133	4.70099	5.86518	4.24108	5.05658	5.78555	1.83188	6.96798	4.90063	2.30451	4.78136	6.37712	5.32157	5.48704	6.17053	4.2555	5.71918
XYLT1	-0.230833	2.83794	3.27501	2.71589	4.06867	3.69599	1.7137	1.36737	2.37016	1.82782	3.08746	1.50589	1.91456	2.93357	3.08916	3.86493	0.594549	2.58256	4.43296	1.92979	2.21101	3.84197	1.02148	0	2.4957
PYCARD	-0.415436	7.86962	8.44133	8.02768	8.26449	6.89397	5.26641	8.09587	4.36247	4.62702	7.95989	5.03694	4.43429	5.29902	7.69495	7.53177	5.37678	6.90183	7.90773	4.75756	7.48454	0.0426443	5.96278	3.33342	5.83693
MAZ	-0.111603	8.3692	7.97126	7.48414	7.92333	8.12552	7.24612	7.73938	7.0505	7.17802	7.73647	7.63633	7.10318	8.46581	8.22482	7.87055	7.77498	8.62527	8.02131	7.88118	7.95088	6.779	7.77169	7.62512	7.58579
STX4	0.214064	5.49089	5.43029	5.06996	5.22805	5.09255	3.97177	4.80426	5.0492	3.69711	5.49506	4.84449	4.34199	5.12143	5.28133	5.51475	5.41616	5.91504	5.99367	4.88606	5.91361	5.73904	5.88289	5.25739	5.29389
CDIPT	0.0293507	5.82655	5.46434	4.98231	5.41244	4.95513	3.92315	3.82171	4.98823	4.1235	5.46434	4.67694	4.58736	5.31034	5.84624	5.41143	4.88362	5.88411	6.11562	4.35332	5.41785	5.63459	5.13217	4.37086	5.30012
BCKDK	-0.0306319	5.21762	5.58916	4.49825	5.11312	4.59096	3.48156	3.9982	5.06393	3.28096	5.13011	3.99458	5.00899	4.95	5.81327	4.81711	4.8953	4.95699	5.48059	3.95699	5.23113	5.22226	4.56133	4.1177	4.80271
KAT8	0.183765	5.61706	4.99322	5.13791	5.57016	5.21451	4.49185	4.94439	5.67016	4.14812	5.86071	5.26978	5.37816	5.59156	4.86196	5.97315	5.54473	5.44593	6.05897	5.30561	6.14975	5.07296	5.96301	5.43896	5.0321
NOMO1	-0.0832028	7.19623	5.20242	4.52042	5.70598	5.98618	5.28725	3.71589	4.68032	5.18864	5.84298	5.0009	5.10769	5.7385	5.05745	5.76474	5.65964	5.5472	6.85985	5.31759	5.83719	6.61941	5.95884	5.46271	4.55949
CCP110	-0.347253	4.51159	3.60763	3.68706	4.40122	3.73118	3.66789	2.60644	2.70708	3.52857	3.44493	3.10769	3.81455	3.81455	2.71149	4.19535	3.48027	3.95233	4.22265	2.51854	3.77821	3.52356	3.65878	2.76977	3.05137
VPS35L	0.113405	4.68874	3.70929	3.9514	4.01703	2.98185	3.09592	4.04264	3.69822	1.69599	4.51412	3.8748	4.0798	4.55704	3.97269	4.69655	4.00809	3.42761	5.16148	3.99639	4.38059	4.54967	4.60466	3.71918	3.67016
RNF40	-0.128486	6.03056	5.66874	5.31723	5.17752	6.11936	4.35403	5.84373	4.85549	4.51159	5.64357	5.02724	5.06091	5.48478	5.77584	5.70736	5.54195	5.98823	5.51538	5.01748	5.24298	5.49889	5.75809	5.36632	5.17353
KNOP1	-0.0626284	4.67976	4.01614	4.23496	4.19219	4.8089	4.25248	2.56071	4.29425	3.17632	5.43363	4.31615	4.5008	4.70044	3.69599	3.904	4.82579	3.90881	4.56742	3.75489	4.75275	4.9279	4.67073	4.70708	3.16189
AAGAB	0.161914	4.53792	4.15218	4.23802	4.05572	4.93404	4.7939	2.89918	4.41684	4.15866	3.86394	4.59753	4.79129	4.87676	3.34908	4.0063	4.85449	4.97545	5.00135	4.41752	4.98504	4.67807	4.66448	4.1035	4.47508
LACTB	0.287746	3.40871	3.63575	3.45943	4.11103	3.41954	2.97636	3.45943	3.29278	2.80323	4.37712	3.31904	3.62644	3.31034	3.22651	4.60763	4.67582	4.34056	3.88557	3.05832	5.01614	5.13504	4.01257	3.70044	3.48285
CSK	-0.105532	6.916	6.79207	6.58571	7.21558	6.23879	6.33342	5.77109	7.54535	6.38405	6.52795	6.16752	7.51183	6.62337	7.09561	6.4224	6.854	6.98311	6.76938	7.28114	7.29057	4.79649	6.69766	5.22689	6.71644
HERC1	0.079136	5.42492	4.64847	4.31252	5.51381	4.47832	5.10601	1.84398	5.95233	5.27501	4.96023	4.32697	6.12681	6.13134	5.29793	5.03738	5.88411	4.2891	5.39541	5.46891	5.96924	4.09339	6.20887	3.78764	4.41616
TRIP4	0.317788	4.04876	3.71149	3.79286	3.86592	3.7126	3.87971	3.78241	4.24184	3.59455	3.66562	3.56316	4.38059	4.24945	3.32193	3.85499	4.11603	3.80941	3.80116	4.22805	4.08831	4.1334	5.00854	4.06091	4.30451
MTFMT	0.122776	3.32769	1.58015	2.82375	3.1811	3.41143	3.66789	1.39506	3.64847	3.32048	2.58496	2.76553	3.90207	3.38543	2.47768	2.89918	3.95233	2.91265	3.66789	2.75489	4.20555	3.47897	3.42895	2.62293	2.27798
RAB11A	0.464224	6.81596	6.13689	6.34696	6.91552	7.13648	7.61464	4.96162	7.80671	7.16189	6.94228	6.32912	8.85471	7.50104	6.45187	6.83618	9.13993	7.28605	7.41354	8.06889	8.11484	7.60392	8.55754	7.55374	7.58496
CTSH	0.219615	5.9364	3.06005	4.04789	5.48414	6.64414	2.62293	1.90304	4.58316	2.0321	5.33949	5.30524	5.62234	7.88856	4.95233	5.54257	5.93428	1.89918	3.39369	4.59096	6.53869	1.28688	6.13586	6.19948	7.67546
CD276	-0.101613	5.50112	4.27947	0.831877	4.89869	1.94111	0.176323	1.16993	1.1375	0.15056	5.51696	3.76129	0.895303	4.60881	5.92576	3.08066	4.06781	0.895303	0.176323	1.46467	3.43429	5.52795	3.13093	3.04439	1.74416
FAH	0.0787808	6.13155	5.39438	5.71205	4.5741	5.44989	6.37591	5.95722	7.30725	5.28577	5.95977	5.8674	7.29471	5.17433	3.74739	5.79312	6.74806	6.74268	6.02547	6.99435	7.68804	3.87774	6.24869	6.41903	5.49057
RPAP1	-0.213286	4.53294	4.10014	3.85798	3.78869	4.44559	4.63285	3.84298	4.42291	3.37851	4.15785	3.45812	4.80116	4.31687	3.97728	3.90207	4.03826	4.17871	4.53294	3.93357	4.39985	4.02148	4.91504	3.24641	3.45812
HOMER2	0.292063	2.21723	1.15704	1.32769	0.475085	0.847997	5.50048	2.45154	2.84197	3.95047	5.41515	0.275007	3.45022	3.78555	0.422233	3.47638	3.61471	2.02148	3.9279	1.60881	0.903038	5.18468	3.72901	2.50843	4.17393
EHD4	-0.0815369	3.89433	1.10434	2.13093	1.74416	2.28096	2.63923	1.58496	2.43563	1.4957	2.87578	1	3.4019	1.9782	0.731183	2.67129	1.99277	2.24489	4.53045	1.62293	2.35614	5.74308	2.02503	2.40327	0.584963
TMEM87A	0.115775	5.11103	4.1177	5.7126	5.11894	5.24565	4.90689	3.69822	4.52795	4.55704	5.03386	4.75969	4.93499	4.50906	4.55459	5.04308	4.1811	7.32661	6.01212	4.73498	4.84348	4.7241	4.87823	3.93546	5.70984
ZNF106	-0.188743	4.23419	3.57289	3.66903	4.60466	3.93923	3.98641	2.44095	4.16672	3.43829	4.36457	3.2854	4.72247	4.05485	4.2149	4.22188	4.23573	3.38681	4.59335	3.03562	4.46923	3.88947	3.83188	2.22342	2.96162
CEP152	-0.122423	4.11187	2.56316	3.44758	4.20477	4.06695	4.50779	2.74201	4.27053	3.73444	3.15381	2.87184	5.0917	3.94298	2.62527	3.83693	3.90497	4.21023	4.81301	2.43829	4.70432	3.3799	4.39369	2.9241	2.20477
ATP8B4	-0.248214	6.00405	4.45418	4.23266	6.84046	5.29646	2.88362	4.88411	3.19535	1.99277	5.81967	5.78921	2.62293	1.774	5.43496	6.6057	2.34767	6.06781	6.07852	1.75275	5.7271	0.0703893	0.604071	0.0565835	5.59842
DTWD1	-0.339967	5.21451	4.80168	5.27612	4.849	4.41684	5.51033	4.65878	4.4522	4.48607	4.3427	4.07468	5.57984	4.76394	4.60466	4.89482	5.23419	4.32409	5.24869	3.90207	5.6401	5.36702	4.45286	4.39849	3.5435
TGM5	-0.342242	3.36036	5.23074	4.08746	4.44095	1.23879	0.505891	3.31759	4.51475	2.28688	5.20594	4.31976	3.24641	1.07039	0.15056	5.8775	1.3505	3.90497	2.66448	0.263034	4.12102	0	2.43563	0.0285692	2.06695
GABPB1	0.0966752	4.57894	3.94673	3.98459	4.19692	4.64847	4.80116	3.33628	4.77136	4.21801	3.80116	3.96717	5.54751	4.54164	3.50208	4.14731	5.47346	4.2854	4.67751	4.99322	4.1035	3.79494	5.18903	4.70321	3.93452
BMF	-0.159655	2.43563	3.63227	3.09424	4.37365	2.18587	1.64616	2.67129	1.09761	2.18269	2.66903	4.02591	0.823749	2.28096	3.8339	4.07895	0.263034	2.81762	3.73552	1.08406	3.14731	0.163499	0.641546	1.87578	3.24031
DMXL2	-0.177603	5.07039	5.39506	4.56133	6.36089	6.61648	2.95606	3.75809	3.07724	4.04789	5.99548	4.77294	4.12598	3.36036	5.44394	5.40905	0.378512	6.48414	6.28355	3.47508	7.31297	3.93452	0.201634	1.96717	5.39951
DNAJC17	0.135239	5.10308	5.09381	5.24679	4.69321	4.93923	5.10182	5.51822	6.00293	2.65992	5.27836	5.38957	5.75942	5.40361	5.43596	4.78398	4.82477	5.31034	5.17951	5.3302	6.0237	5.21023	5.27053	5.47703	5.17672
EIF3J	0.0797874	6.23898	6.10538	6.21412	5.69265	6.61206	6.8009	5.17991	7.07884	5.52262	5.85474	6.70252	7.26707	6.8031	5.25437	6.0766	6.90472	6.60481	6.31651	6.72615	6.34731	5.9528	6.18963	6.11312	6.20535
SPG11	-0.192648	5.23611	4.56255	4.84197	5.04089	4.0018	4.0635	4.47379	4.78816	3.99548	4.94111	4.45483	4.80684	4.80478	4.44692	5.2817	3.28836	4.97223	5.91049	3.89336	5.4121	4.38543	4.77979	3.46336	4.07296
VPS18	-0.0646318	4.04089	4.01525	3.61589	3.69822	3.83086	4.09845	2.58736	3.58616	4.49442	3.63807	3.25248	3.72901	3.85798	3.55336	3.87184	2.6017	5.23917	4.27724	3.60288	3.80323	3.14731	3.77189	2.66903	4.16752
OIP5	-0.155202	4.54102	4.13011	4.48543	4.19692	4.58376	5.06221	3.19377	4.42492	3.16832	4.22805	3.56316	5.13586	4.00809	3.62293	4.41143	4.54844	4.52669	4.3978	3.8125	4.48349	3.91265	4.52982	4.47054	3.67469
BLOC1S6	0.256689	5.01123	3.99186	4.86245	5.25437	4.91169	5.3302	3.63807	5.65048	4.3067	4.9486	5.17473	5.81481	5.43563	4.08746	5.14241	5.19219	4.36107	5.86518	5.49121	5.23764	5.83086	5.94017	4.59694	4.88947
MYEF2	-0.0182256	5.18626	3.65764	0.275007	5.13996	0.201634	3.74846	0.137504	5.51696	0.124328	0.0565835	0	5.18468	5.18824	0.111031	0.163499	4.54535	0.443607	4.50208	5.23955	0.0703893	5.42626	5.51286	4.27277	2.13422
SGK3	-0.287354	4.18824	3.23419	4.6153	4.90689	2.45418	2.72683	2.68482	2.33628	4.24717	3.80116	3.22188	3.13586	1.85599	0.765535	4.88899	3.08576	4.54967	3.52982	2.52857	3.38819	1.21412	1.87578	1.14405	3.9644
CSPP1	-0.375395	4.24793	3.77083	5.03694	4.25172	4.34767	4.2426	3.42358	3.90111	4.71644	3.58976	3.27947	4.57471	4.05224	3.13093	4.80529	4.32337	4.56803	4.07039	2.6893	3.98094	3.04963	3.98185	3.92315	2.88947
[truncated: 7,733 more rows]
