# Supplementary material for: ACSL4-Associated Lipid Metabolism is a Distinct Therapeutic Vulnerability in KMT2A-Rearranged Acute Myeloid Leukemia
Source: Research Square preprint supplement (doi:10.21203/rs.3.rs-4924771/v1), 2024-10-15
Supplement: Supplementary file 3 [file 8fd5f7c24fdb97272ee66a42.xlsx]

## Sheet: Proteomics_NOMO1
Supplementary Table S3A: Proteomics data of NOMO1 cells comparing NTC sgRNA and ACSL4 sgRNA
Protein	NOMO1_NTC_1	NOMO1_NTC_2	NOMO1_NTC_3	NOMO1_NTC_4	NOMO1_ACSL4_1	NOMO1_ACSL4_2	NOMO1_ACSL4_3	NOMO1_ACSL4_4	MEAN_NTC	MEAN_KD	RATIO	LFC	p-value
AAAS	703239	569551	687443	566582	694271	646301	699964	691278	631704	682954	1.08113	0.112539	0.264008
AACS	190101	189004	203861	159139	200546	210108	211789	209030	185526	207868	1.12042	0.164044	0.0949283
AAGAB	18696	21952.3	17995.4	17763.5	17548.3	18273	17283.9	18631.8	19101.8	17934.2	0.938877	-0.0909913	0.322309
AAK1	197483	182087	193404	176995	194142	187131	198378	194822	187492	193618	1.03267	0.0463851	0.309175
AAMDC	5002.56	9134.4	9790.71	17637.2	11416.3	10733.2	9085.32	8285.38	10391.2	9880.05	0.950809	-0.0727733	0.862199
AAMP	229020	231523	215958	196007	208892	229113	211649	223632	218127	218321	1.00089	0.00128296	0.98442
AAR2	71178.3	74948.1	81314.7	50588	72099.3	74718	76938.7	68806.6	69507.3	73140.7	1.05227	0.0735097	0.629418
AARS1	1.19567e+06	1275371	1.33144e+06	1075117	1.30792e+06	1.40236e+06	1.3519e+06	1.28144e+06	1.2194e+06	1.33591e+06	1.09554	0.131648	0.126462
AARS2	152176	151694	167857	138696	150924	170238	162696	151969	152606	158957	1.04162	0.0588227	0.433739
AARSD1	225550	253246	261041	226859	229086	262630	245359	238681	241674	243939	1.00937	0.013457	0.850804
AASDHPPT	415373	366604	488066	345553	472696	501006	461528	450651	403899	471470	1.1673	0.223172	0.119223
AATF	59893.1	71062	69529	53371.1	64693.9	70010.8	72740	60050.7	63463.8	66873.9	1.05373	0.0755084	0.527145
ABAT	41954.3	62100.4	16294.2	34466.6	38753.2	17038.2	15223.7	1	38703.9	17754	0.458714	-1.12433	0.143177
ABCA2	22743.8	25617.8	24898.2	24552.2	33206.3	34244.4	22062.2	23597.9	24453	28277.7	1.15641	0.209654	0.31582
ABCB1	48864.9	254785	1	1	1	1	1	9736.77	75913	2434.94	0.0320754	-4.96239	0.313
ABCB10	110870	120073	113844	108290	118834	132121	127269	114490	113269	123178	1.08748	0.120989	0.08931
ABCB6	10700.9	1	145068	1	120703	26821.8	31514.6	1	38942.7	44760.2	1.14939	0.200863	0.899769
ABCB7	362010	394500	400217	342448	369509	394808	400728	368670	374793	383429	1.02304	0.0328633	0.613395
ABCB8	43688.4	57260.9	42289.9	43336.3	35010.4	40164.9	38904.4	36570.6	46643.9	37662.6	0.807449	-0.308556	0.080554
ABCC1	70058.9	76301.9	69764.6	66811.8	71129.7	72328.1	72987.9	68255.3	70734.3	71175.2	1.00623	0.0089652	0.853318
ABCC10	3002.65	1	2293.59	1814.49	2270.96	2998.6	2356.49	2349.74	1777.93	2493.94	1.40272	0.488228	0.350179
ABCC4	152520	175562	168403	138105	159643	177290	164136	155033	158648	164025	1.0339	0.0480925	0.602336
ABCD1	148878	158206	162693	129685	156238	168985	167489	160815	149865	163382	1.09019	0.124577	0.162786
ABCD3	260554	288440	294849	245374	280276	273508	286178	257728	272304	274423	1.00778	0.0111807	0.87918
ABCE1	1.40264e+06	1.35701e+06	1.40835e+06	1.32066e+06	1.32425e+06	1.35488e+06	1.32865e+06	1302598	1.37216e+06	1.32759e+06	0.967519	-0.0476386	0.119956
ABCF1	1.42449e+06	1.36078e+06	1459213	1.27251e+06	1.3792e+06	1.48335e+06	1.41752e+06	1.37134e+06	1.37925e+06	1.41285e+06	1.02437	0.0347307	0.517623
ABCF2	258006	257244	274866	189263	246810	262010	269036	252857	244845	257678	1.05241	0.0737025	0.554105
ABCF3	455980	450272	474339	415836	448709	468516	468874	454934	449107	460258	1.02483	0.0353847	0.446452
ABHD10	409162	428003	393835	377854	381546	380877	391443	425563	402214	394857	0.98171	-0.0266308	0.641504
ABHD11	381715	427524	447423	366192	415997	488178	438024	402735	405713	436234	1.07523	0.104639	0.297375
ABHD12	78952.2	77886.9	87535.2	78851	76434.1	86578	80101.4	83952.4	80806.3	81766.5	1.01188	0.0170413	0.771849
ABHD13	41359.8	1	67101.2	18268.2	45677.5	55556.9	50559	40625.5	31682.5	48104.8	1.51834	0.602492	0.343686
ABHD14B	380227	362077	388929	345240	392253	401214	415235	407043	369118	403936	1.09433	0.130043	0.0286187
ABHD16A	141846	125639	158055	124764	138598	155254	149759	145715	137576	147332	1.07091	0.0988339	0.318999
ABHD17A	49866.7	59683.2	68670.7	42376.5	50132	56435.4	54034.3	56803.3	55149.3	54351.2	0.98553	-0.0210284	0.900556
ABHD17B	17258.8	1	16620.9	27117	29877.2	32414.9	28866.2	34575.8	15249.4	31433.5	2.06129	1.04355	0.0602072
ABHD3	6380.01	1	6331.23	4695.3	8013.19	9452.75	11022.7	15224.4	4351.88	10928.2	2.51115	1.32835	0.0228908
ABHD4	25590.5	23523	43150.3	17837.6	34851.9	46292.8	39566.3	41401.8	27525.3	40528.2	1.4724	0.558166	0.0927353
ABHD5	24426.1	47645	28244.2	17194.5	28273.5	26840.3	30177.4	28226.9	29377.5	28379.5	0.966031	-0.0498589	0.888244
ABHD6	46570.4	28743.6	43172.4	33237.5	45685.4	46874.2	47251.8	49263.3	37931	47268.7	1.24618	0.317508	0.10927
ABI1	49257.3	66865.9	46469	41988	53334.8	54382.3	55974.2	48113.1	51145.1	52951.1	1.03531	0.0500656	0.769329
ABI2	69584	68320	91708.8	55173.9	85263.3	87742.9	83865.5	65970.7	71196.7	80710.6	1.13363	0.180949	0.3403
ABITRAM	21797.7	27293.9	28920.2	29742.4	18223.2	18944.2	21976.9	27402.2	26938.6	21636.6	0.803184	-0.316197	0.103047
ABL1	21755.7	14890.3	26244.7	21421.8	24464.8	25616.3	24692.3	23286.1	21078.1	24514.9	1.16305	0.217911	0.238639
ABL2	32817.8	31995.9	36077.5	30645.4	34238.4	29006	34702.6	30311.9	32884.1	32064.7	0.975082	-0.0364047	0.670381
ABR	213212	208154	229297	179934	211869	221830	228671	220608	207649	220745	1.06306	0.0882295	0.299211
ABRACL	39867	95377.7	50920.2	61148.2	50551.2	49492.1	39616.6	53652.6	61828.3	48328.1	0.781651	-0.355403	0.346874
ABRAXAS1	14396.8	1	14996.3	13233.5	13222	1	11546.2	14967	10656.9	9934.05	0.93217	-0.101335	0.888007
ABRAXAS2	226171	200242	236219	191489	221148	237246	239900	222152	213530	230112	1.07765	0.107893	0.223654
ABT1	61454.3	78434.6	88099.2	60543.2	60961.8	83290.4	83420.7	74086	72132.8	75439.7	1.04584	0.0646687	0.713368
ACAA1	173313	182593	176433	157720	175428	170810	176647	191696	172515	178646	1.03554	0.0503805	0.413508
ACAA2	3053333	3.11199e+06	3.33613e+06	2.88067e+06	3.27904e+06	3.38434e+06	3386432	3.27409e+06	3095533	3.33098e+06	1.07606	0.105757	0.0824084
ACACA	463961	439034	495656	398573	519789	535718	536395	534215	449306	531529	1.183	0.242451	0.0255748
ACACB	20267.2	1	44526	21627.6	20883.9	16346.4	30432	30586.4	21605.4	24562.2	1.13685	0.185044	0.77766
ACAD10	30454.3	26632	35778.4	25732	31581.9	35521.5	31831	33414.1	29649.2	33087.1	1.11595	0.158278	0.235894
ACAD8	123336	97740.7	109538	93735.3	109007	116018	111880	106603	106087	110877	1.04515	0.0637078	0.533499
ACAD9	750543	709930	708266	664608	719964	746438	729580	732579	708337	732140	1.0336	0.0476842	0.272617
ACADM	2.92502e+06	2.49916e+06	3.35834e+06	2.62621e+06	3.04989e+06	3.28829e+06	3.25843e+06	3131603	2.85218e+06	3.18205e+06	1.11565	0.157891	0.182372
ACADS	146379	126114	158901	108442	147983	151984	162901	146507	134959	152344	1.12882	0.17481	0.218724
ACADSB	158999	121417	147768	140566	143249	151210	147271	144914	142188	146661	1.03146	0.0446924	0.615299
ACADVL	4191475	3598126	4217249	3.83892e+06	4.20872e+06	4307886	4.26251e+06	4.15418e+06	3.96144e+06	4.23332e+06	1.06863	0.0957653	0.163985
ACAP1	373910	262591	519353	333319	352300	427089	433761	555021	372293	442043	1.18735	0.247746	0.350132
ACAP2	244016	252339	255266	233296	241858	248391	244739	240205	246229	243798	0.990127	-0.0143149	0.668268
ACAT1	2.18946e+06	2.23369e+06	2.34193e+06	1.99084e+06	2.19111e+06	2.50623e+06	2.35603e+06	2192632	2.18898e+06	2.3115e+06	1.05597	0.0785698	0.289018
ACAT2	1.28483e+06	1.28845e+06	1.38143e+06	1288509	1.55372e+06	1.62804e+06	1.55963e+06	1.5703e+06	1.31081e+06	1.57792e+06	1.20378	0.267574	0.000158562
ACBD3	494951	501603	509075	414117	487886	478253	493874	511783	479936	492949	1.02711	0.0385951	0.608279
ACBD5	15999.3	1	19740	1626.15	18799.3	19489	20645.8	20279.4	9341.61	19803.4	2.11991	1.084	0.126804
ACBD6	48060.1	61576.1	62386.3	50389.3	62299.1	65402.3	58509.9	59807.4	55603	61504.7	1.10614	0.145535	0.215968
ACIN1	1.40567e+06	1.4794e+06	1.41594e+06	1.43879e+06	1.48524e+06	1.3766e+06	1.52914e+06	1431862	1.43495e+06	1.45571e+06	1.01447	0.0207209	0.600833
ACLY	2.54325e+06	2.63634e+06	2721169	2.35724e+06	2.65822e+06	2871791	2801672	2.70213e+06	2.5645e+06	2758452	1.07563	0.105182	0.0882157
ACO1	255837	213857	276851	235646	293903	295962	299850	285564	245548	293820	1.19659	0.258929	0.0342692
ACO2	1476238	1263435	1.48393e+06	1.26298e+06	1.38733e+06	1.45144e+06	1.37606e+06	1.35178e+06	1.37165e+06	1.39165e+06	1.01459	0.0208902	0.778587
ACOT1	533670	488085	694638	178659	535465	636480	598819	533319	473763	576021	1.21584	0.281956	0.41797
ACOT13	634527	642472	695066	672067	728669	686949	763424	726193	661033	726309	1.09875	0.135861	0.0209984
ACOT2	95023.4	1	153679	73447.8	118424	187824	38681.5	58658.5	80537.9	100897	1.25279	0.325142	0.674936
ACOT4	91631	123312	108767	92924	100149	186086	167466	122518	104159	144055	1.38303	0.467836	0.135559
ACOT7	673979	810104	726873	609796	640164	699523	680342	641579	705188	665402	0.943581	-0.0837816	0.42881
ACOT8	285998	265477	292090	275159	273397	269915	292675	301283	279681	284317	1.01658	0.0237205	0.646417
ACOT9	50733.2	57269.2	47009.3	38452.5	49056.6	52592.9	54176.3	53566.4	48366	52348	1.08233	0.114141	0.392508
ACOX1	223131	215909	230259	199202	200674	197957	206972	191410	217125	199253	0.917688	-0.123924	0.0680648
ACOX3	169553	162890	101371	143631	177415	179921	189614	176881	144362	180958	1.25351	0.325968	0.0950578
ACP1	546890	711138	653355	579950	584869	563854	576524	660265	622833	596378	0.957524	-0.0626192	0.564487
ACP2	86316.2	95740.3	103520	92977.1	97037.8	94861.1	88187.8	90412.4	94638.4	92624.8	0.978723	-0.0310278	0.644731
ACP3	146650	171610	113448	138967	164901	168586	148474	119157	142669	150280	1.05334	0.0749774	0.659714
ACP5	1	1	933.963	747.736	1	1	1	1	420.925	1	0.00237572	-8.71742	0.185579
ACP6	15094.7	5881.29	27557.7	15854.3	21093	22304.7	21529.3	23658.8	16097	22146.4	1.37581	0.460282	0.266919
ACSF2	127930	111024	125622	116592	120742	120887	118615	136148	120292	124098	1.03164	0.0449368	0.52572
ACSF3	51125.7	51636.7	61303.6	46232.7	53106.9	62533	61311.5	58449.8	52574.7	58850.3	1.11937	0.162682	0.156001
ACSL1	543753	498424	510327	460382	529882	519215	542225	515942	503221	526816	1.04689	0.0661059	0.269667
ACSL3	509598	463287	524375	438547	543619	551104	557989	569273	483952	555496	1.14783	0.198914	0.032791
ACSL4	162360	139979	159841	132287	8937.93	10234.8	5369.35	9714.64	148617	8564.18	0.057626	-4.11714	0.000254314
ACSL5	180916	152246	186974	156213	167577	175229	179420	186740	169087	177242	1.04823	0.0679498	0.440387
ACSM3	1	1	14781.5	1	28266.6	17272.5	14203.2	10526	3696.13	17567.1	4.75282	2.24879	0.0402417
ACSS1	120228	113115	120115	94651.4	117218	132442	129979	123544	112028	125796	1.1229	0.16723	0.10663
ACSS2	67900.5	56896	70137.4	47387.6	74987.1	74538.9	76415.7	77249.8	60580.4	75797.9	1.25119	0.323306	0.0619248
ACTA1	12038161	7.55027e+06	16759587	17350267	14883663	17588721	15172516	13968772	1.34246e+07	15403418	1.1474	0.198374	0.462772
ACTA2	1.63136e+06	3.86933e+06	2.04354e+06	3.21159e+06	2.50998e+06	2.60463e+06	2488175	2.41767e+06	2.68896e+06	2.50512e+06	0.931631	-0.10217	0.745883
ACTB	10827747	7076453	11430042	8500012	11052635	6.39612e+06	11673660	11275435	9.45856e+06	1.00995e+07	1.06776	0.0945857	0.703684
ACTBL2	1.81063e+06	1.66364e+06	3.14836e+06	1.93604e+06	2.27617e+06	3217070	2.58343e+06	2.48086e+06	2.13967e+06	2.63938e+06	1.23355	0.302815	0.264486
ACTG1	190042833	218453601	254784721	203603345	229236481	246809249	229118817	209152369	216721125	228579229	1.05472	0.0768545	0.49243
ACTL6A	1.59362e+06	1.52317e+06	1.79869e+06	1.36017e+06	1644818	1718827	1.68091e+06	1.65262e+06	1.56891e+06	1.67429e+06	1.06717	0.0937873	0.332088
ACTL6B	133683	1	86606	110500	70468.5	50904.1	95413.7	148978	82697.5	91441	1.10573	0.144998	0.817414
ACTL8	17265.6	1	1	15205.8	11066.2	1	268.233	18882.4	8118.36	7554.46	0.93054	-0.103859	0.934303
ACTMAP	22899.5	1	10344.7	35415.7	23303.4	18417	35771.3	33274.8	17165.2	27691.6	1.61324	0.689959	0.285117
ACTN1	4572048	4833936	4.72344e+06	4319303	4.80271e+06	4729346	4816793	4.91813e+06	4.61218e+06	4816743	1.04435	0.0626084	0.163379
ACTN4	1.14112e+06	1.36862e+06	1.17808e+06	1.21376e+06	1.31605e+06	1.15549e+06	1.24474e+06	1.28042e+06	1.2254e+06	1.24918e+06	1.01941	0.0277275	0.710496
ACTR10	127034	134997	132126	124818	123716	124491	129604	142322	129744	130033	1.00223	0.00321494	0.955256
ACTR1A	927512	743720	969841	863735	908093	907059	990222	958354	876202	940932	1.07388	0.102827	0.291323
ACTR1B	50788.4	24598.6	53782.7	42619.5	49627.8	54021	52579.1	53716.8	42947.3	52486.2	1.22211	0.28937	0.24202
ACTR2	1.81348e+06	1.8537e+06	1.79787e+06	1.55566e+06	1.81064e+06	1.67849e+06	1.72926e+06	1.79712e+06	1755177	1.75388e+06	0.999258	-0.00107039	0.986811
ACTR3	3.281e+06	3.44142e+06	3.78833e+06	3.3558e+06	3.45273e+06	3.40454e+06	3.56894e+06	3.53891e+06	3.46664e+06	3.49128e+06	1.00711	0.0102195	0.846109
ACTR3B	872035	1.57657e+06	1.13678e+06	960487	1.07792e+06	1.12943e+06	1.15991e+06	1.0103e+06	1.13647e+06	1.09439e+06	0.962973	-0.0544321	0.808379
ACTR5	31362.5	28562.1	33981.2	28023.8	29781.7	32598	32209.3	30576.8	30482.4	31291.4	1.02654	0.037791	0.622874
ACTR6	40994.4	47142.8	44426.5	32253.7	37459.5	42309.1	41180.4	40946.3	41204.3	40473.8	0.982272	-0.0258062	0.841579
ACTR8	62316.8	60709.2	57253.8	65676.2	59564.7	60041.1	57360.9	63252	61489	60054.7	0.976673	-0.0340525	0.528845
ACVR1	16176.7	1	1	1	1	1	20843.3	1	4044.93	5211.58	1.28842	0.365605	0.86577
ACY1	206725	216163	268742	232355	248924	261709	262364	252495	230996	256373	1.10986	0.150376	0.158796
ACYP1	221022	225145	272798	197771	261987	271736	264602	215571	229184	253474	1.10598	0.145329	0.278101
ACYP2	102179	136213	114154	107344	123509	129051	112774	109306	114972	118660	1.03208	0.0455481	0.692333
ADA	96461.1	121904	108454	102112	110709	101532	106739	116578	107233	108889	1.01545	0.0221143	0.80426
ADA2	84718.5	190636	99292.2	34460.5	84940.9	94710.3	85801.9	86198.2	102277	87912.8	0.859558	-0.218334	0.68941
ADAM10	174867	152511	158444	173320	156775	134543	157600	182172	164786	157773	0.957441	-0.0627443	0.559563
ADAM15	16461.3	29700.4	17174.1	15117.2	14777	10753.4	13152.1	21164.8	19613.2	14961.8	0.762842	-0.390544	0.301555
ADAM17	66749.4	81737.7	72342.7	64804.8	70419.2	71364.8	68867.1	76425	71408.7	71769	1.00505	0.00726252	0.93463
ADAM9	77545.4	97800.6	74808.6	60827.5	63977.2	25715.6	70033.4	114444	77745.5	68542.6	0.881628	-0.181758	0.664707
ADAP1	42720.9	53905	36116.3	33756.6	37757.3	36943.4	29099.5	37725.9	41624.7	35381.5	0.850012	-0.234445	0.274372
ADAR	655718	572164	621658	536811	606643	594945	637592	683654	596588	630709	1.05719	0.0802391	0.3428
ADARB1	27322.6	24074.3	44802.5	23282.7	23258.6	34718.1	24797.3	27544.3	29870.5	27579.6	0.923305	-0.115121	0.704255
ADAT2	20069.5	1	10069.9	21967.8	7618.43	8869.02	8806.59	22613.1	13027.1	11976.8	0.919377	-0.121271	0.871465
ADAT3	28650.6	40235	38700.4	33332	37509.6	39864.1	38176	31804.9	35229.5	36838.6	1.04568	0.0644349	0.632688
ADCK5	22708.8	22351.2	15083.4	22706.2	29495.6	27764.3	31014.1	33668	20712.4	30485.5	1.47185	0.557629	0.00678044
ADCY7	44240.6	60992.7	32748.3	60656.1	58833.4	37738.7	60062.4	30325.9	49659.4	46740.1	0.941213	-0.0874072	0.78361
ADD1	556698	546266	694901	500666	598307	632766	650136	615817	574633	624256	1.08636	0.119498	0.326022
ADD2	202309	206168	206067	171765	199395	214969	207960	197854	196577	205045	1.04307	0.0608409	0.40713
ADD3	171338	177341	183767	159953	165874	186464	176617	183840	173100	178199	1.02946	0.0418849	0.484695
ADGRE1	67873.7	1	58308.9	36312.3	14268.8	1	6755.37	52922.7	40624	18487	0.455075	-1.13582	0.294283
ADGRE2	33135.6	36656.2	24580.8	31872.8	24121.2	25095.1	12822.2	34573.7	31561.4	24153	0.765273	-0.385954	0.210702
ADGRE5	83568.4	92991.4	87384.7	73377.3	90914.8	92186	87639.3	98683.1	84330.4	92355.8	1.09517	0.131149	0.154527
ADGRG3	23909	1	13679.8	18124.8	26003.1	27161.4	21658.9	7186.78	13928.6	20502.5	1.47197	0.557749	0.375207
ADGRL2	71842.2	76484.4	48926.7	66913.9	64943.5	65912.8	66547.1	48421.5	66041.8	61456.2	0.930565	-0.103821	0.562448
ADH5	997447	917325	974204	863129	945631	1.03009e+06	976715	937927	938026	972590	1.03685	0.0522029	0.386405
ADI1	243365	272163	371904	210378	325132	335926	308584	300496	274452	317534	1.15697	0.210356	0.307151
ADIPOR1	18907.1	28900.4	36393.3	25853.3	28729.3	26630	50141.5	33005.2	27513.5	34626.5	1.25853	0.331736	0.318016
ADK	1.16726e+06	951239	1.06756e+06	1.09823e+06	1.09777e+06	985917	1.10888e+06	1229638	1.07107e+06	1.10555e+06	1.03219	0.0457095	0.626271
ADNP	156111	149555	176292	143376	154967	170460	169875	158112	156333	163354	1.04491	0.0633727	0.432341
ADNP2	19931.6	18859.8	25886.2	18718.7	19326.6	22498.3	20188.3	22896.9	20849.1	21227.5	1.01815	0.0259511	0.85168
ADO	158242	151549	160393	159080	157285	155907	162078	156784	157316	158013	1.00443	0.00637924	0.783182
ADPGK	79886.2	65356.5	91944.7	68092.9	80581.2	81640.8	79137.4	89643.6	76320.1	82750.8	1.08426	0.11671	0.381925
ADPRH	91863.8	68715.1	106342	82123	104546	103301	74141.5	118709	87261.1	100174	1.14798	0.199103	0.334051
ADPRS	122517	142961	131948	107204	132475	136694	134512	127431	126158	132778	1.05248	0.0737886	0.452993
ADRM1	1183483	989848	1.05437e+06	1.10168e+06	1.06176e+06	1.11797e+06	1.10105e+06	1.14907e+06	1.08235e+06	1.10746e+06	1.0232	0.0330919	0.602732
ADSL	972181	936661	1.03118e+06	896204	956387	984616	993137	1.00502e+06	959055	984791	1.02683	0.0382035	0.448
ADSS1	46496.5	65431.2	54880.6	44267.5	47622.3	57145.4	49945.2	58017.2	52768.9	53182.5	1.00784	0.0112629	0.942729
ADSS2	1.76005e+06	1.53599e+06	1.64626e+06	1.46171e+06	1.72146e+06	1.66179e+06	1.7116e+06	1.75537e+06	1.601e+06	1.71255e+06	1.06968	0.0971746	0.185698
AEBP2	48251.9	54934.3	59292.4	43726.9	51586.6	59157.8	55440.7	48532.7	51551.4	53679.5	1.04128	0.0583594	0.629648
AFDN	68661.6	69299.7	72051.7	65331.5	71268.9	73875.8	72408.3	71935	68836.1	72372	1.05137	0.0722656	0.0771879
AFF1	54727	80878.5	42678.1	55430.6	54481.9	46756.8	54571.7	50636.6	58428.5	51611.8	0.883331	-0.178974	0.463729
AFF4	19211.7	37386.5	25270.8	21465.6	24056	21915.1	26022.3	25578.4	25833.6	24393	0.944232	-0.082786	0.749579
AFG1L	27090.6	21613.7	33143.4	24631.4	29985	36016.2	39488.1	31949.6	26619.8	34359.7	1.29076	0.368221	0.054808
AFG3L2	557050	569544	552710	496813	573039	605350	591733	586801	544029	589231	1.08309	0.115148	0.0608384
AFTPH	34801.3	29006.1	38225.1	31220.8	44729.3	38222.9	42616.4	35399.6	33313.3	40242	1.20799	0.272604	0.0555916
AGA	145785	187064	121599	148563	126109	104915	126948	175266	150753	133309	0.884292	-0.177405	0.419521
AGAP1	25451.7	1	38358.8	19493.3	16690.8	42452.6	20951.6	15880.3	20826.2	23993.8	1.1521	0.204262	0.765864
AGAP2	32164.7	45021.1	35350.4	30267.7	35901.2	44848.5	46069.7	48414.9	35701	43808.6	1.2271	0.29525	0.108006
AGAP3	29362.2	25131	30508.4	26947.4	30655.8	31383.5	28227.2	27982.3	27987.2	29562.2	1.05627	0.0789846	0.332382
AGFG1	186634	218196	209857	199340	221266	199257	208605	199819	203507	207237	1.01833	0.0262028	0.678745
AGFG2	24705.2	34464.1	26182.2	25499.4	26152.2	29938.7	30994.6	29524.3	27712.7	29152.5	1.05195	0.0730693	0.594053
AGGF1	20370.4	33092.6	24587.8	21703.3	22870.8	23035.3	25121.5	24099.8	24938.5	23781.9	0.953619	-0.0685147	0.715541
AGK	279830	283492	276292	245756	249814	263291	268316	280993	271342	265603	0.978849	-0.0308411	0.615495
AGL	204443	205058	217372	189396	179471	197511	204497	203461	204067	196235	0.961619	-0.0564625	0.373501
AGMAT	28898.7	31638.6	37078.8	26008.8	52418.1	44093.7	43672.8	57525.8	30906.2	49427.6	1.59928	0.67742	0.00535352
AGO1	221140	256645	244577	225801	220107	233003	229145	240710	237041	230741	0.973424	-0.03886	0.531869
AGO2	182758	152329	188566	147763	176428	187570	188117	184919	167854	184258	1.09773	0.134525	0.213353
AGO3	29618.9	25349.8	33957.2	22595.4	30840.4	34163.1	34941.6	31899.9	27880.3	32961.3	1.18224	0.241524	0.131757
AGO4	22821.7	60867.2	20047.7	9813.85	16249.7	38344.5	28395.6	30793.4	28387.6	28445.8	1.00205	0.00295517	0.996389
AGPAT1	49985.2	35964.2	64200.4	40074.1	43968.7	48398	51404.8	56270.6	47556	50010.6	1.05161	0.0726061	0.736123
AGPAT2	231054	118238	274445	154080	296085	270186	268253	283665	194454	279547	1.4376	0.523659	0.0945226
AGPAT3	126534	139247	118870	102979	108574	123135	122408	116792	121908	117728	0.965712	-0.0503347	0.639915
AGPAT5	95170.9	114684	94667.1	76204.3	93041.2	93250.4	96243.9	100978	95181.7	95878.3	1.00732	0.0105205	0.936155
AGPS	503185	439939	513357	433905	482492	474475	490343	513764	472596	490268	1.03739	0.0529629	0.474596
AGRN	83194.8	1	56545.7	67847.6	64466.4	54591.9	73683	75625.5	51897.3	67091.7	1.29278	0.370475	0.47074
AGT	93138.3	134558	109678	90928.9	80761.4	86650.6	68173	67284.1	107076	75717.3	0.707137	-0.499938	0.0445148
AGTPBP1	7351.06	7428	8883.75	6897.26	8428.34	8379.52	7195.35	8282.95	7640.02	8071.54	1.05648	0.079269	0.443536
AGTRAP	158978	207672	63784.6	158345	178631	195348	166904	70117.8	147195	152750	1.03774	0.0534469	0.897222
AHCTF1	250559	241280	247837	239663	252747	251756	253068	238166	244835	248934	1.01674	0.0239561	0.394956
AHCY	5.37666e+06	5.57193e+06	6.14876e+06	5224743	5534937	5839267	5.77656e+06	5.55844e+06	5.58052e+06	5677300	1.01734	0.0248045	0.678665
AHCYL1	321662	306250	322578	261669	315789	310852	320554	332295	303040	319873	1.05555	0.0779914	0.331019
AHCYL2	56523.2	47006.9	65612.8	45105.4	49895.4	53652.7	62536.8	57241.1	53562.1	55831.5	1.04237	0.0598675	0.694814
AHDC1	7463.88	1	11393.2	5478.96	8741.2	12359.1	7756.44	5820.86	6084.27	8669.41	1.42489	0.51085	0.390261
AHNAK	1405746	1.62449e+06	1410361	1340706	1.57938e+06	1.52256e+06	1.58525e+06	1434070	1.44533e+06	1.53032e+06	1.0588	0.082433	0.287933
AHSA1	3138528	3257896	3.32028e+06	2.86605e+06	3.30929e+06	3298515	3.18111e+06	3.09009e+06	3.14569e+06	3.21975e+06	1.02354	0.0335739	0.544969
AIDA	16682.3	26785.5	20227.3	22266.1	17855.4	16989.6	19432.7	23136.6	21490.3	19353.6	0.900572	-0.151086	0.432299
AIF1	38971.1	82133.1	68037.5	80849	69123	87214.4	85929.3	28753.8	67497.7	67755.2	1.00381	0.00549271	0.9884
AIFM1	1.70067e+06	1.62978e+06	1.76417e+06	1.61155e+06	1.73619e+06	1808230	1.76944e+06	1.68343e+06	1.67654e+06	1.74932e+06	1.04341	0.0613059	0.151604
AIFM2	107670	129653	107870	100934	119718	126535	99338.7	91726.9	111532	109330	0.980256	-0.0287693	0.838877
AIG1	94715.6	81063.5	25925	90801.5	66452.4	86613.3	99478.6	20930.3	73126.4	68368.7	0.934938	-0.0970574	0.846253
AIMP1	731039	785004	838962	655161	799988	871781	829087	760000	752541	815214	1.08328	0.115408	0.230142
AIMP2	1.1129e+06	1050624	1.14061e+06	993094	1.11183e+06	1161815	1215080	1.11195e+06	1.07431e+06	1.15017e+06	1.07061	0.0984362	0.118778
AIP	480579	587594	487828	512922	475082	472468	480297	522964	517231	487703	0.942911	-0.0848059	0.333999
AK1	186542	226838	208425	183014	217732	206302	209614	195244	201204	207223	1.02991	0.0425217	0.619421
AK2	4.45853e+06	6028519	6.66614e+06	5857760	6.74648e+06	7109946	6124924	4746321	5.75274e+06	6.18192e+06	1.0746	0.103805	0.561295
AK3	68034.8	102085	122811	80014.6	84679.7	106694	106625	116186	93236.3	103546	1.11058	0.151308	0.492047
AK4	119000	126522	141693	112292	136721	155142	135071	127043	124877	138494	1.10905	0.149321	0.16741
AK6	365630	413086	435610	373456	446092	431066	422540	404720	396945	426104	1.07346	0.102267	0.185171
AKAP1	90297.6	92932	89351.9	90067	94112.6	87403.8	90402.2	91946.2	90662.1	90966.2	1.00335	0.00483041	0.858373
AKAP10	39871.5	32800.5	41194.3	35018	41092.7	39249.1	42475.1	39004.1	37221	40455.2	1.08689	0.120208	0.206341
AKAP11	39016.2	35796.1	33805.6	36706.9	36395.9	33399.9	36869	38360	36331.2	36256.2	0.997936	-0.00298137	0.961743
AKAP13	23149.4	21355.7	21997.1	24744.9	20936.1	28971.2	26933.7	21835.6	22811.8	24669.2	1.08142	0.112928	0.425407
AKAP17A	84714.9	97360.2	83761.3	78804.4	77582.9	86523.6	85972.1	80742.5	86160.2	82705.3	0.959901	-0.0590428	0.479698
AKAP2	188325	459414	178865	150754	289138	276792	297557	146169	244340	252414	1.03305	0.0469036	0.9245
AKAP8	71468.6	69944.3	81127	62623.9	74927.7	78571.8	77650.7	69439.6	71291	75147.4	1.05409	0.0760041	0.416535
AKAP8L	61618.3	83699.1	59350.6	55053.3	62566.7	60543.8	61626	59021.4	64930.3	60939.5	0.938536	-0.0915154	0.578657
AKAP9	52504.4	63635.9	57378.1	55797	50381.6	60287.5	56366.3	51699.1	57328.8	54683.6	0.953859	-0.0681523	0.447325
AKR1A1	674304	710077	672612	668080	687568	732202	701368	728590	681268	712432	1.04574	0.0645295	0.0755545
AKR1B1	292289	261871	306750	254618	270513	297419	337695	348750	278882	313594	1.12447	0.169243	0.17096
AKR1C1	835664	880112	886783	752668	802205	861786	876738	896069	838806	859199	1.02431	0.0346551	0.603727
AKR1C2	189593	116492	160608	148664	225326	248302	160539	159828	153839	198499	1.2903	0.367709	0.158965
AKR1C3	155792	134861	157815	144695	180020	131362	172424	191664	148291	168867	1.13876	0.187461	0.220289
AKR7A2	566791	532844	606726	571584	590415	597554	603959	621111	569486	603260	1.05931	0.0831186	0.108142
AKT1	158642	151455	166228	142300	165385	168262	165793	154799	154656	163560	1.05757	0.080751	0.194526
AKT1S1	22117.6	1	26435.4	16064.3	34570.6	24005.5	24242.1	16835.5	16154.6	24913.4	1.54219	0.62498	0.256133
AKT2	71512.9	66694.1	82764.1	58039.1	75300.6	80481.5	77969.2	79979.7	69752.6	78432.8	1.12444	0.16921	0.190637
AKT3	23011.5	29158.4	22092.3	19942.9	24197.4	29354.3	28496.2	23546.5	23551.3	26398.6	1.1209	0.164654	0.295585
ALAD	226402	256119	291141	191348	245981	252609	281285	271618	241253	262873	1.08962	0.123822	0.397949
ALAS1	56019	69647.3	64018.7	51074	57090.3	59331.3	60434.6	60175.9	60189.8	59258	0.98452	-0.0225074	0.837782
ALB;SWISS-PROT:P02768-1	6476.88	1	36886.2	8072.17	30655.5	56899.5	4507.09	109129	12859.1	50297.8	3.91147	1.96771	0.194539
ALCAM	35778.8	196444	170441	190133	59895.6	88209.3	96508	73796.1	148199	79602.3	0.53713	-0.896656	0.166988
ALDH16A1	361324	336843	374924	299215	356017	394542	381419	392653	343077	381158	1.111	0.151857	0.104199
ALDH18A1	1.04999e+06	1.08803e+06	1.0875e+06	975833	1.03193e+06	1.09317e+06	1.0809e+06	1.03408e+06	1.05034e+06	1.06002e+06	1.00922	0.0132359	0.765881
ALDH1A1	1	1	1	1	44634.1	87425.1	48594.7	6646.59	1	46825.1	46825.1	15.515	0.065849
ALDH1A2	101389	152402	119429	141828	124738	162360	124442	94636.4	128762	126544	0.982777	-0.0250639	0.905951
ALDH1B1	21795.4	30562.3	29928.4	19687.5	22478.6	25355.1	26975.1	22611.7	25493.4	24355.1	0.955349	-0.0658996	0.723065
ALDH2	948460	984578	940911	893577	1.05729e+06	1.05438e+06	1.06437e+06	990737	941881	1.0417e+06	1.10597	0.145316	0.00777739
ALDH3A2	204574	207176	183387	189651	205149	224361	224339	131179	196197	196257	1.00031	0.000440499	0.998058
ALDH4A1	41068.9	49235.2	45389.6	43880.5	43518	47950.4	46736.5	39389.1	44893.6	44398.5	0.988973	-0.015997	0.853183
ALDH5A1	435298	407118	401262	382061	414923	425564	432625	416649	406435	422440	1.03938	0.0557241	0.248004
ALDH6A1	142095	149180	146392	129154	136995	147815	144194	140852	141705	142464	1.00535	0.00770494	0.885845
ALDH7A1	29933.6	31383.3	35756.2	34627	37643.1	33926.1	40637.5	44860.8	32925	39266.9	1.19262	0.254129	0.0662136
ALDH9A1	964778	939189	1.04481e+06	905775	947398	996620	1.04804e+06	1.03132e+06	963637	1.00584e+06	1.0438	0.0618448	0.301193
ALDOA	27782181	32201759	31812687	30400877	32011771	32810331	32418883	30349473	30549376	3.18976e+07	1.04413	0.0623056	0.29321
ALDOC	4505293	6.71329e+06	4.57012e+06	4.40726e+06	5161598	5142073	5.13436e+06	4963985	5.04899e+06	5.1005e+06	1.0102	0.0146443	0.932154
ALG1	141914	185794	143569	130496	138958	136919	133498	139434	150443	137202	0.911987	-0.132914	0.355856
ALG10	40087.9	43491.2	46817.4	26371.4	42981.5	40806.5	40374.4	40606.3	39192	41192.2	1.05104	0.0718115	0.68769
ALG11	116697	73838.2	119132	98768.3	115832	106509	111888	119568	102109	113449	1.11106	0.15194	0.363099
ALG12	15546.8	20218.6	21282.3	21275.7	15540	14458.2	13427.3	19885.9	19580.8	15827.8	0.808332	-0.30698	0.10569
ALG2	51064.1	52642.9	56727.9	52624.4	54151.1	64623.7	64479	50218.2	53264.8	58368	1.09581	0.131995	0.262354
ALG3	269579	267187	216928	237599	257841	181624	197192	249379	247823	221509	0.893818	-0.161946	0.296625
ALG5	386042	463205	402162	238708	397108	377463	408494	355319	372529	384596	1.03239	0.0459922	0.81981
ALG6	61974.5	55413	46482.1	58453.2	64772.9	51053.1	53067.2	50254.3	55580.7	54786.9	0.985718	-0.020753	0.872388
ALG8	257277	146248	141739	194167	200583	111465	146060	207211	184858	166330	0.899772	-0.152368	0.618896
ALG9	480331	288324	484624	342013	432895	472889	482250	455019	398823	460763	1.15531	0.208277	0.302211
ALKBH1	59793.7	59331	58036	53845.2	55609.2	53851.4	49289.5	55615.5	57751.5	53591.4	0.927965	-0.107857	0.0850267
ALKBH2	32378.8	1	25995.8	17167.2	31536.2	1	33594	5392.86	18885.7	17631	0.933564	-0.0991786	0.914493
ALKBH3	34933.6	43061.5	35232.1	35134.2	39416.9	37267.4	39085	40141.7	37090.3	38977.7	1.05089	0.0716068	0.421996
ALKBH4	95995.8	239408	91079.3	83004.2	90317.2	87176.4	69104.4	95546.7	127372	85536.2	0.671547	-0.574439	0.346745
ALKBH5	165850	184137	162367	156020	158545	157253	148423	160221	167094	156110	0.93427	-0.0980886	0.168839
ALKBH6	70321.5	49701.6	59655.3	45376.3	59905.3	66050.9	58518.2	68377.7	56263.7	63213	1.12351	0.168017	0.31345
ALKBH7	90367.4	126136	113127	83783.7	88938.4	98256.8	94821.5	100096	103354	95528.1	0.924284	-0.113592	0.49152
ALKBH8	13601.1	1	16251	10896.9	13231.6	14945.3	16614.5	13327.2	10187.5	14529.6	1.42622	0.512201	0.313288
ALOX5AP	18366.2	97305.7	93864.4	28098.6	38329	44456.1	44897.4	1510.21	59408.7	32298.2	0.54366	-0.879222	0.306112
ALYREF	2.40968e+06	2.69918e+06	2.81815e+06	2.69344e+06	2.46856e+06	2760798	2.62573e+06	2.56397e+06	2.65511e+06	2.60476e+06	0.981038	-0.0276195	0.65388
AMACR	74972.1	40836.7	148057	86833.6	99627.3	123426	106694	68896.5	87674.7	99661.1	1.13671	0.184869	0.655492
AMBRA1	43088.5	40883.3	51648.4	37622.1	45598.8	53663.3	50635	47166	43310.6	49265.8	1.1375	0.185866	0.150395
AMD1	53343.8	54518	82394.4	64024.1	37092.7	33855.3	69450.9	54043.7	63570	48610.7	0.764679	-0.387075	0.210803
AMDHD2	87005.6	91003.3	98066.6	83822.7	83940.7	105519	95422.6	91689.3	89974.5	94142.8	1.04633	0.0653338	0.475766
AMER1	3210.38	4526.42	5792.91	1345.18	3252.4	2247.63	3854.22	5717.18	3718.72	3767.86	1.01321	0.0189374	0.968709
AMFR	41756.4	43713.8	49698	37689.2	46428.3	49958.9	53403.8	49456.4	43214.3	49811.8	1.15267	0.204979	0.0729935
AMMECR1	58673.8	70879.8	56866.7	50740.4	53272.3	68841.8	56166	59565.3	59290.2	59461.3	1.00289	0.00415854	0.975823
AMMECR1L	14190	13877.7	18605.7	13451.8	15894.2	17842	15992.2	14797.8	15031.3	16131.5	1.0732	0.101913	0.4578
AMOTL1	14175.5	16361.6	9899.66	13869.2	14485.7	11242.9	12715.2	12892.4	13576.5	12834.1	0.945314	-0.0811339	0.644445
AMPD2	241727	200655	232545	191210	221004	217485	229906	233667	216534	225515	1.04148	0.0586311	0.524842
AMPD3	32186	41835.5	40294.3	32666	35115.6	37802.8	34097.1	34981	36745.4	35499.1	0.966082	-0.0497828	0.663997
ANAPC1	407176	347366	400078	330118	385914	410547	400579	398786	371185	398957	1.07482	0.104095	0.244172
ANAPC10	21655.4	18553.1	38533.2	24566.7	23267.9	29732	26387.4	26716.7	25827.1	26526	1.02706	0.0385212	0.887591
ANAPC2	61228.8	67154	66307.5	60622.2	66238.2	65205.3	65956.4	67464.4	63828.1	66216.1	1.03741	0.0529895	0.255103
ANAPC4	214391	175644	201412	190723	191777	197997	187576	203280	195542	195157	0.99803	-0.00284442	0.967565
ANAPC5	107652	106275	105414	103723	103858	104406	107119	105221	105766	105151	0.994185	-0.0084144	0.592979
ANAPC7	128862	135896	144055	121033	130731	143036	138010	131400	132461	135794	1.02516	0.03585	0.585724
ANGEL1	9602.27	1	8377.01	8018.15	10539	10632.9	8266.29	15251.3	6499.61	11172.4	1.71893	0.781511	0.134001
ANGEL2	11303.9	1	15497	12331.1	9549.62	11979.2	13796.5	14807.7	9783.25	12533.3	1.28109	0.357375	0.487701
ANK1	10861.2	14372.9	16174.2	14409.5	33057.8	58365.3	50254.4	36201.1	13954.4	44469.6	3.18677	1.67209	0.0127804
ANKFY1	229336	219602	220248	212901	220061	219167	220506	235375	220522	223777	1.01476	0.0211432	0.550228
ANKH	62182.5	59158.6	65718.3	47423.4	61544.6	62560.8	63841.7	67306.6	58620.7	63813.4	1.08858	0.12245	0.287031
ANKHD1	399017	430732	402926	375345	404618	409519	405599	407995	402005	406933	1.01226	0.0175761	0.694346
ANKIB1	11135.9	1	1	1	5703.25	1	4355.39	3501.54	2784.72	3390.3	1.21746	0.283878	0.851495
ANKLE1	1	1	1	1	8390.49	1	1	4139.81	1	3133.07	3133.07	11.6134	0.216309
ANKLE2	68761.4	70065.6	72563.4	59581.1	72346	70944.9	70701.3	68450.4	67742.9	70610.6	1.04233	0.0598166	0.392855
ANKMY2	38968.8	44570.6	39427.7	41089.9	40981.9	41425	39284.9	40937.1	41014.3	40657.2	0.991295	-0.0126142	0.805709
ANKRD11	37283.3	32594.9	32187.5	30659.9	33513.6	33838.7	39407.4	27110	33181.4	33467.4	1.00862	0.0123821	0.925249
ANKRD13A	207600	215056	209831	160071	201595	217466	224021	210224	198139	213327	1.07665	0.106548	0.33112
ANKRD17	175221	216172	182129	178896	183843	184094	191238	193626	188104	188200	1.00051	0.000736129	0.992717
ANKRD22	91244.7	76319.1	110461	89160.1	94506.1	90269.8	97362.2	102387	91796.3	96131.3	1.04722	0.0665705	0.595452
ANKRD27	48664	36648.4	51288.3	43937.7	46930.5	48842.3	47542.9	47361.2	45134.6	47669.2	1.05616	0.0788237	0.489187
ANKRD28	122936	128034	116628	109286	105970	105922	115706	125599	119221	113300	0.950334	-0.0734938	0.377605
ANKRD40	24455	43746.6	31178	28507.5	27055.9	33376.2	31472	35098	31971.8	31750.5	0.99308	-0.0100187	0.963194
ANKRD44	93053.5	113504	92133.6	92180.1	104266	97261.4	99306.6	87784.3	97717.8	97154.6	0.994236	-0.00833924	0.932089
ANKRD52	21108	31224.8	30026.1	16563.5	19121.1	21076.3	16046.6	20262.7	24730.6	19126.7	0.773402	-0.37071	0.212985
ANKRD54	77868.2	1	1	77132.1	71122.2	100596	1	70906.2	38750.6	60656.5	1.5653	0.646444	0.50569
ANKS1A	55414.6	57467.3	60989.4	48749.3	61218.1	63956.2	60693	55160.2	55655.2	60256.9	1.08268	0.11461	0.201235
ANKZF1	48682.6	68714.8	55422.6	48251.2	48312.2	50836.9	44719.3	47417.5	55267.8	47821.5	0.865268	-0.208781	0.217739
ANLN	138387	122405	132734	115981	140558	135601	136967	131116	127377	136061	1.06817	0.0951479	0.18541
ANO10	64265.9	60051.3	65713.8	48790.7	61629.9	63344	66619.3	64811.1	59705.4	64101.1	1.07362	0.102487	0.339813
ANO6	47992.7	53070.2	56538.2	45877.1	55018.5	53960.6	51369.6	54722.8	50869.5	53767.9	1.05698	0.0799427	0.32507
ANP32A	2.95984e+06	3.03965e+06	2.41861e+06	2774205	2.85254e+06	2.70021e+06	2.58137e+06	3.13368e+06	2.79807e+06	2.81695e+06	1.00675	0.00969971	0.921075
ANP32B	3.02453e+06	3.07927e+06	2.91198e+06	2762600	2.77063e+06	2.91788e+06	2.57941e+06	3004767	2.9446e+06	2.81817e+06	0.957066	-0.0633103	0.322401
ANP32E	640796	843816	664123	538828	656062	697431	635405	621836	671891	652683	0.971413	-0.0418436	0.786468
ANPEP	45114.1	51712.2	45373.4	41260.3	50306.1	50517.2	51742.3	50705.6	45865	50817.8	1.10799	0.14794	0.104816
ANTKMT	9708.5	1	14787.1	9879.25	9449.08	1	9441.85	13701	8593.97	8148.22	0.948133	-0.076839	0.919703
ANTXR2	13530.7	16293.9	17059.1	14361.1	19699.7	20687.8	22859.2	14844.5	15311.2	19522.8	1.27507	0.350572	0.0836018
ANXA1	1.32199e+06	1.76726e+06	1.47769e+06	1.28629e+06	1.42243e+06	1.49455e+06	1.4688e+06	1.35932e+06	1.4633e+06	1436274	0.981527	-0.0268995	0.825196
ANXA11	614257	751103	601864	734787	844691	643304	828149	485223	675503	700342	1.03677	0.0520979	0.803162
ANXA13	88124.8	152565	89636.2	116133	57127.4	61881.5	98221.2	68532.7	111615	71440.7	0.640065	-0.64371	0.072649
ANXA2	874391	1084510	910000	903317	908585	890933	937554	808786	943054	886465	0.939993	-0.0892778	0.354018
ANXA3	64020.4	99283.5	65131.5	80191.9	53036.6	60320.9	58222.1	68985.8	77156.8	60141.3	0.779469	-0.359437	0.129079
ANXA4	367527	463966	319687	410314	459062	332211	404401	274047	390373	367430	0.941228	-0.0873843	0.668951
ANXA5	6118432	11248158	7.4684e+06	6200973	7.71884e+06	7.95597e+06	7.79509e+06	6.94742e+06	7.75899e+06	7.60433e+06	0.980067	-0.0290477	0.906968
ANXA6	76434.6	110139	77904.6	86585.1	77158.5	80874	81036	70284.2	87765.7	77338.2	0.881189	-0.182477	0.278221
ANXA7	1.30757e+06	1.60964e+06	1.35986e+06	1.38693e+06	1.31523e+06	1.3843e+06	1.41751e+06	1.32176e+06	1.416e+06	1.3597e+06	0.960239	-0.0585338	0.474608
AP1B1	1.47452e+06	1.70809e+06	1.28598e+06	1.35196e+06	1314939	1.30151e+06	1.30497e+06	1.45224e+06	1.45514e+06	1343414	0.92322	-0.115254	0.327097
AP1G1	755972	697229	675821	672770	653389	623844	672487	714018	700448	665935	0.950727	-0.0728973	0.248434
AP1G2	210509	240372	231436	200589	221817	223246	211042	220729	220727	219208	0.993122	-0.00995741	0.882767
AP1M1	603057	504717	610570	492627	604570	621701	597828	569944	552743	598510	1.0828	0.114768	0.244959
AP1S1	89152	119915	121177	69677.5	105123	121017	107542	96672.1	99980.3	107588	1.0761	0.105807	0.603574
AP1S2	340786	423227	401363	328116	371581	395177	388932	371549	373373	381810	1.0226	0.032237	0.744148
AP2A1	880980	775301	871358	801675	842634	837961	838359	841699	832329	840163	1.00941	0.0135168	0.782589
AP2A2	227850	157836	231372	199642	219876	211339	226766	223028	204175	220252	1.07874	0.109351	0.417278
AP2B1	679367	827306	637224	571559	684143	675183	656867	671853	678864	672012	0.989906	-0.0146367	0.907771
AP2M1	974230	977541	932092	828907	947774	935890	945247	979904	928192	952204	1.02587	0.0368466	0.546369
AP2S1	697553	659028	751068	572744	654545	739626	740274	750992	670098	721359	1.0765	0.106345	0.294906
AP3B1	642339	647782	655195	595087	621490	661125	663428	645878	635101	647980	1.02028	0.0289646	0.47219
AP3B2	146961	140071	173092	128647	118288	141000	128409	166672	147193	138592	0.94157	-0.0868595	0.563691
AP3D1	472062	424292	408472	362771	425167	417882	411098	441479	416899	423906	1.01681	0.0240471	0.782135
AP3M1	336794	323592	330438	306751	337100	319981	337938	331015	324394	331509	1.02193	0.0312988	0.395994
AP3M2	24214.4	28484.8	29153.7	16598.4	25163.7	23519.2	27718.1	26218	24612.8	25654.8	1.04233	0.0598154	0.749432
AP3S1	422525	391300	448406	379529	464674	455871	447250	474411	410440	460551	1.12209	0.16619	0.0417311
AP4B1	18259.7	13568.5	20367.9	15014.5	19944.8	17574.4	17123.6	20560.1	16802.6	18800.7	1.11892	0.162101	0.311279
AP4E1	13295	21094	17191.1	8055.55	12812.2	17264.5	18017.1	14955.2	14908.9	15762.3	1.05724	0.0802969	0.791658
AP4M1	21622.8	22151.9	32581.1	22838.1	26773.7	27509.9	23949.3	23955.3	24798.5	25547	1.03018	0.042903	0.801039
AP4S1	34313.9	52632.2	49256.5	33688.1	38143.6	48188.9	47122.1	48366.3	42472.7	45455.2	1.07022	0.0979115	0.614984
AP5B1	26412.6	36139	26237.3	22653.8	24762.5	24521.4	28756.8	29748.7	27860.7	26947.4	0.967218	-0.0480873	0.788114
AP5M1	67452.2	52747.4	69318.6	56106.5	54779.6	64337.5	65392.2	69122.2	61406.2	63407.9	1.0326	0.0462784	0.710217
AP5Z1	15119.5	19521.7	16653.2	16352.9	17459.8	18655.4	18668.6	15840.8	16911.8	17656.1	1.04401	0.0621366	0.542458
APAF1	137152	115567	146520	117290	133644	147751	148106	153698	129132	145800	1.12907	0.17514	0.117115
APBA1	1	1	50401.5	1	20431.3	1	1	41834.2	12601.1	15566.9	1.23535	0.304925	0.860066
APBB1IP	128255	214915	207762	162614	173700	173984	165340	190240	178386	175816	0.985591	-0.0209387	0.909423
APC	51710.8	77411	57355.8	53714.2	55643.2	55811.9	52350.3	54343.4	60047.9	54537.2	0.908228	-0.138874	0.421046
APEH	2.00091e+06	1.9403e+06	2.01221e+06	1812705	1.96541e+06	2.15307e+06	2.06727e+06	2.02822e+06	1.94153e+06	2.05349e+06	1.05767	0.0808842	0.113818
APEX1	1.9837e+06	1813836	2132746	1.8493e+06	1.97962e+06	1.97231e+06	2.05209e+06	2.08328e+06	1.94489e+06	2.02182e+06	1.03955	0.0559646	0.379245
APEX2	7725.76	1	9497.68	8656.52	9456.59	10609.6	10704.2	10656.8	6470.24	10356.8	1.60068	0.678685	0.173124
APH1A	49241.6	43006.8	46918.7	48142	56069.9	48692.8	40703.9	54364.5	46827.3	49957.8	1.06685	0.093361	0.448668
API5	1.17818e+06	1.27399e+06	1.37764e+06	1.17432e+06	1.36963e+06	1.45788e+06	1.43598e+06	1.28385e+06	1.25103e+06	1.38684e+06	1.10855	0.148678	0.0728606
APIP	211409	230328	252523	187810	223784	223341	248605	249629	220517	236340	1.07175	0.0999681	0.361375
APLP2	76455.3	102529	90302.4	67583.2	85816.8	85660.2	91590.9	86727.9	84217.5	87448.9	1.03837	0.0543204	0.705409
APMAP	640662	692286	686520	632411	670832	692511	687604	652834	662970	675946	1.01957	0.027964	0.50054
APOBEC3B	126813	109850	120958	107317	117357	106635	109907	118077	116235	112994	0.972122	-0.0407912	0.574501
APOBEC3C	108588	95256.5	88078.3	99149.7	95399.8	61613.3	97591.8	111048	97768.1	91413.3	0.935001	-0.0969597	0.605783
APOBEC3F	117655	75490.6	125859	112409	139983	112816	136528	130293	107853	129905	1.20446	0.268385	0.146984
APOBEC3G	48455.7	42256.9	47375.5	36968.7	43396.3	43811.2	45941.4	50754.1	43764.2	45975.7	1.05053	0.0711215	0.510978
APOBR	71993	85239.6	95581.8	60109.6	97080.3	95825.1	95559.4	84677.2	78231	93285.5	1.19244	0.253913	0.14558
APOE	4117.11	22485.1	5203.42	3426.17	5084.15	8134.4	17031	32845.2	8807.95	15773.7	1.79084	0.84064	0.405096
APOL2	24682	32291.7	28391.1	21475.7	26264.6	32862.9	32683.7	25568.7	26710.1	29345	1.09865	0.135727	0.423879
APOO	180003	181780	184545	151824	196356	192091	192867	189150	174538	192616	1.10358	0.142187	0.0963642
APOOL	461003	432508	484672	424823	471874	479202	494942	489483	450751	483875	1.07349	0.102304	0.0897268
APP	39983.4	43965.1	41905.3	42059.8	46926.3	56626.7	61626.8	37311.3	41978.4	50622.8	1.20593	0.27014	0.206723
APPL1	242833	299148	278726	243733	255894	264405	262214	254229	266110	259186	0.973979	-0.0380376	0.653838
APRT	3.03997e+06	3.45199e+06	3.97617e+06	3.19086e+06	3324382	3.77222e+06	3.71624e+06	3.57711e+06	3.41475e+06	3.59749e+06	1.05352	0.0752116	0.465431
APTX	93644.3	84883.5	90166.9	75961.6	90025.5	89576.5	93842.5	94199.2	86164.1	91910.9	1.0667	0.0931501	0.235256
AQR	403865	395495	459337	371384	395140	419795	436152	425223	407520	419078	1.02836	0.0403452	0.601661
ARAF	170078	143878	170268	160203	168180	175588	171913	182502	161107	174546	1.08342	0.115591	0.11784
ARAP1	249488	255265	280052	214735	251909	269492	266932	265999	249885	263583	1.05482	0.0769934	0.391269
ARAP3	42579.7	38833.9	46747.5	34563.8	39119.3	40395.5	40893.9	39042.3	40681.2	39862.8	0.979881	-0.0293213	0.775932
ARCN1	1.91172e+06	1.84687e+06	2.18749e+06	1.75313e+06	1.93241e+06	2.06161e+06	2.00623e+06	1.94734e+06	1.92481e+06	1.9869e+06	1.03226	0.045805	0.564335
AREL1	12842.3	8880.17	11743.9	16046.8	13744.5	7936.47	1	15940.6	12378.3	9405.64	0.759849	-0.396216	0.483718
ARF1	24050.4	14407.5	23560.6	19061.4	24377.3	23658	20316.3	17586.6	20270	21484.6	1.05992	0.0839556	0.675736
ARF3	7186004	7.33543e+06	7.19247e+06	7184202	7799313	8.29907e+06	7.52318e+06	7640200	7224526	7815440	1.08179	0.113424	0.037636
ARF4	1.80403e+06	1.83237e+06	2.01894e+06	1.74799e+06	1.72575e+06	1.86988e+06	1.89378e+06	1.89687e+06	1.85083e+06	1.84657e+06	0.997699	-0.0033236	0.954636
ARF5	206875	330822	258892	192019	208250	235738	250119	236543	247152	232663	0.941375	-0.0871587	0.682701
ARF6	702105	785549	771309	552065	660354	753075	807737	884991	702757	776539	1.10499	0.144033	0.341375
ARFGAP1	87746.6	91078.8	99474.5	90348.8	96152.4	103377	103745	91435.3	92162.2	98677.4	1.07069	0.098545	0.148459
ARFGAP2	402408	414499	477416	336467	463278	484445	462876	425096	407698	458924	1.12565	0.170755	0.177166
ARFGAP3	117676	143111	139348	115910	140447	145232	147728	143469	129011	144219	1.11788	0.160764	0.119764
ARFGEF1	148653	138136	158736	124530	150604	156163	147516	153071	142514	151839	1.06543	0.0914378	0.295755
ARFGEF2	20708.8	27064.4	21461.7	19580.8	21152.8	22610.1	21718.5	22092.9	22203.9	21893.6	0.986021	-0.0203095	0.865586
ARFIP1	113448	128585	135203	119184	147783	137432	142086	120119	124105	136855	1.10273	0.141086	0.150162
ARFIP2	16070.5	20671.5	22337.9	22729.1	21706.1	22201.5	20958.5	19442.5	20452.3	21077.1	1.03055	0.0434192	0.723217
ARFRP1	27637.6	33519	26373.4	34412.1	24554	23185.9	26235.7	30979.2	30485.5	26238.7	0.860693	-0.216429	0.161712
ARGLU1	525726	629606	580402	605699	538977	577404	529359	505598	585359	537835	0.918812	-0.122158	0.133833
ARHGAP1	943303	909143	978790	794014	943773	1.00206e+06	976782	927296	906312	962478	1.06197	0.0867447	0.264983
ARHGAP10	13130	1	11261.7	1	11334.5	5474.06	12340.2	9476.22	6098.41	9656.26	1.58341	0.663031	0.407132
ARHGAP11A	10737.6	13015.8	9859.1	9816.19	10043.6	12146.8	10714.6	10928.4	10857.2	10958.3	1.00932	0.0133799	0.912011
ARHGAP12	167409	152067	169546	163252	167481	183701	173888	158459	163069	170882	1.04792	0.0675217	0.284456
ARHGAP15	279510	240395	289976	226923	303059	300057	321385	299708	259201	306052	1.18075	0.239708	0.0474573
ARHGAP17	294696	306204	310023	282155	329366	295372	300990	304070	298270	307450	1.03078	0.0437341	0.386219
ARHGAP18	104256	123364	108524	103664	116201	115858	107828	111463	109952	112838	1.02625	0.0373773	0.594942
ARHGAP19	118593	126552	128411	116630	137565	135301	128790	118283	122547	129985	1.0607	0.0850135	0.209716
ARHGAP25	44590.7	50469	49365.2	42416	45367.6	54860.6	48886.4	49304.2	46710.2	49604.7	1.06197	0.0867373	0.331989
ARHGAP26	61547.3	28025.7	59214.3	41499.7	61542.8	54823.8	69536.3	50811.1	47571.8	59178.5	1.24398	0.314968	0.25506
ARHGAP27	37747.1	42640.9	27981.3	38893.1	42021.3	45696.3	44392	23675.3	36815.6	38946.2	1.05787	0.0811644	0.73803
ARHGAP30	63562.7	81663.4	74545.3	78002.1	58840.3	72858.1	70849.3	54558.3	74443.4	64276.5	0.863428	-0.211852	0.138973
ARHGAP35	44510	47664.2	45054.5	40050	43250.9	47887.1	45369.6	43593	44319.7	45025.2	1.01592	0.0227842	0.725474
ARHGAP4	280988	295368	322072	260431	298153	310192	315479	287533	289715	302840	1.0453	0.0639193	0.409472
ARHGAP45	466777	534571	551643	447013	473381	536685	510469	499595	500001	505033	1.01006	0.0144454	0.868147
ARHGAP5	5031.27	18119.1	11229.2	3876.85	12818.1	10235	11435.9	11306.8	9564.11	11449	1.19707	0.259513	0.608041
ARHGAP9	597951	1.05785e+06	800660	724805	808622	843163	826453	836092	795315	828582	1.04183	0.059118	0.754666
ARHGDIA	4.0755e+06	4.9731e+06	4636395	3.93355e+06	4449413	4.62545e+06	4.48002e+06	4.13394e+06	4.40463e+06	4.4222e+06	1.00399	0.00574337	0.950068
ARHGDIB	17398515	19793783	18934865	17243693	18112173	18360571	17848057	17487607	18342714	17952102	0.978705	-0.0310543	0.580728
ARHGEF1	877193	884104	916934	789522	876886	920157	897165	885273	866938	894870	1.03222	0.0457486	0.391074
ARHGEF10	9536.16	13259.9	13240.1	10710.2	10386.9	10294.7	9991.07	11712	11686.6	10596.2	0.906695	-0.14131	0.340935
ARHGEF11	9935.15	16059.4	13195.4	11430.8	13567.5	16889.9	14086.8	13459.1	12655.2	14500.8	1.14584	0.196407	0.285782
ARHGEF12	1	1	26139.9	11288.6	1	1	7660.93	12859	9357.62	5130.48	0.548268	-0.867047	0.572594
ARHGEF16	18586.1	26013.6	31962.4	23057.5	19515.2	23822.6	20861.5	19608.2	24904.9	20951.9	0.841275	-0.249351	0.259405
ARHGEF18	105097	117603	108461	98055.2	105756	102883	106711	101640	107304	104247	0.971513	-0.0416945	0.515179
ARHGEF2	1.29326e+06	1491153	1.38906e+06	1.29941e+06	1.32713e+06	1.43186e+06	1344972	1.36114e+06	1.36822e+06	1.36628e+06	0.998579	-0.00205081	0.971726
ARHGEF40	31634.2	47146.1	24507.2	34543	35365.5	41934.5	40220.7	25676.9	34457.6	35799.4	1.03894	0.0551117	0.83012
ARHGEF6	755813	821663	693200	725213	696802	577647	663536	778952	748972	679234	0.906889	-0.141003	0.218726
ARHGEF7	83920.9	91502.7	86135.9	73172.8	84217.3	88326.8	83566.6	86511.4	83683.1	85655.5	1.02357	0.0336101	0.651395
ARID1A	2320599	2.2628e+06	2.8825e+06	2.29139e+06	2847707	2.91469e+06	2894508	2669116	2.43932e+06	2.83151e+06	1.16078	0.215089	0.0711649
ARID1B	53730	69855.9	58048.5	52610.9	63580.9	68792.4	61164.2	61738.7	58561.3	63819.1	1.08978	0.124039	0.287528
ARID2	131988	132113	149866	121207	130439	138721	146450	136969	133793	138145	1.03252	0.0461724	0.551529
ARID3A	115453	123964	129226	109684	128978	133385	132726	123051	119582	129535	1.08323	0.115342	0.105272
ARID3B	13143.7	1	13546.4	15085.2	12978.6	16881.7	14443.3	15625.3	10444.1	14982.2	1.43452	0.520569	0.288782
ARID4A	12459.2	18801.4	11077.4	10545.9	9614.67	12424.3	12611.9	13655.9	13221	12076.7	0.913449	-0.130604	0.611971
ARID4B	33638.7	35654.8	34277.3	31311.3	30420	36508.8	31742.8	32473.9	33720.5	32786.4	0.972297	-0.0405305	0.581865
ARIH1	65855.3	60545.7	50164.6	53120.2	50427.1	50691.5	51352.1	68242.7	57421.5	55178.3	0.960936	-0.0574883	0.704538
ARIH2	146649	129565	134257	123603	122305	128543	125756	149166	133518	131443	0.984455	-0.0226031	0.7988
ARL1	369850	269984	385758	310170	353170	382209	393947	408219	333940	384386	1.15106	0.202967	0.157966
ARL11	56390.6	1	59046.1	35224.6	59542.7	39201.8	35328.8	64410.2	37665.6	49620.9	1.31741	0.397701	0.477001
ARL13B	13734.7	1	18218.2	16062.9	11598.4	10628.5	14389.5	7672.34	12004.2	11072.2	0.92236	-0.116598	0.84106
ARL14EP	59369.8	78240.7	81530.3	67796.9	69036.3	75001	74148.8	62540.3	71734.4	70181.6	0.978353	-0.0315736	0.800538
ARL15	27583.7	30140.9	46926.9	33052.1	35461.6	37739.6	36892.1	37771.3	34425.9	36966.1	1.07379	0.102711	0.598927
ARL2	369427	429990	435498	389811	402065	419370	402042	381970	406182	401362	0.988134	-0.017222	0.79759
ARL2BP	29833	1	19544.4	62669.6	50205.3	1	1	103921	28012	38532.2	1.37556	0.460018	0.724454
ARL3	179190	273131	174133	174967	203256	206035	190244	198009	200355	199386	0.995162	-0.0069966	0.970872
ARL5B	4318.5	1	1	12341.8	17305.2	1	1	1	4165.58	4327.06	1.03877	0.0548714	0.976432
ARL6	6453.46	1	9586.54	8815.36	5198.27	11581.5	10036.1	11160.4	6214.09	9494.09	1.52783	0.611486	0.264142
ARL6IP1	114365	136786	146132	121216	100464	118873	112930	138469	129625	117684	0.907881	-0.139426	0.308422
ARL6IP4	730256	570452	806276	792897	687141	587072	614236	667390	724971	638960	0.88136	-0.182197	0.216615
ARL6IP5	589864	512825	735707	391693	613054	765060	675143	616538	557522	667449	1.19717	0.259628	0.237211
ARL6IP6	152939	1	177338	131391	173397	178726	183973	171190	115417	176821	1.53202	0.615434	0.218777
ARL8A	734753	837519	916556	607958	793532	803985	826364	823353	774196	811809	1.04858	0.0684399	0.613833
ARL8B	865941	1.09468e+06	1.02527e+06	529615	925055	1.03154e+06	947308	981504	878877	971352	1.10522	0.144332	0.519178
ARMC1	144838	187276	158716	139785	148338	165123	158358	155924	157654	156936	0.995448	-0.00658265	0.952294
ARMC10	76484.7	110253	80298.1	80102.9	75373.6	82294.9	75580.4	74781.7	86784.7	77007.6	0.887341	-0.17244	0.30511
ARMC5	18200.4	14809.2	18409	15094.6	21874.9	24789.6	22938.6	22967.7	16628.3	23142.7	1.39177	0.476917	0.00228859
ARMC6	169802	215044	203038	181403	190357	186174	180871	168910	192322	181578	0.944137	-0.0829317	0.391121
ARMC8	332328	325912	325834	295983	322873	318748	331494	327519	320014	325158	1.01607	0.0230059	0.585037
ARMCX3	116082	139316	112280	90898.3	116201	112663	116824	112461	114644	114537	0.999069	-0.00134383	0.992124
ARMCX5	369542	6.91487e+06	567665	422300	520347	580109	622438	603788	2.06859e+06	581670	0.281191	-1.83038	0.425373
ARMH3	12652.5	13486.4	17109.2	15355.8	13586.1	14554.9	14801.2	11299.5	14651	13560.4	0.925566	-0.111592	0.426949
ARMT1	123046	125465	137984	130079	141380	146693	136153	138407	129143	140658	1.08916	0.123219	0.032105
ARNT	57553.4	48072.6	61050.2	56551.5	58102.6	58317.1	57938.6	56300.2	55806.9	57664.6	1.03329	0.0472422	0.550921
ARPC1A	280169	287648	280702	221703	252988	252057	267125	291050	267556	265805	0.993457	-0.00947064	0.925849
ARPC1B	4187505	3.38064e+06	4.42728e+06	3.47337e+06	4.28795e+06	4.12799e+06	4363336	4.3839e+06	3.8672e+06	4.29079e+06	1.10954	0.149956	0.201188
ARPC2	3.14532e+06	3285239	3.60061e+06	2.85512e+06	3.27681e+06	3.46831e+06	3399200	3.34474e+06	3.22157e+06	3.37226e+06	1.04678	0.0659524	0.408382
ARPC3	2.00697e+06	2.51345e+06	2.76456e+06	1.78283e+06	2448728	2.57381e+06	2.41709e+06	2.30542e+06	2.26695e+06	2.43626e+06	1.07469	0.103916	0.513435
ARPC4	6.85545e+06	7646684	6603845	6.16071e+06	6.38599e+06	6.90132e+06	6644835	6.51266e+06	6.81667e+06	6.6112e+06	0.969857	-0.0441556	0.570166
ARPC5	2300378	3.74246e+06	2.52784e+06	2.71405e+06	2.24862e+06	2084911	2.15166e+06	2.39513e+06	2.82118e+06	2.22008e+06	0.786933	-0.345688	0.154432
ARPC5L	559236	831402	655434	506464	772178	756263	710962	618792	638134	714549	1.11975	0.163173	0.385961
ARPP19	51159.3	51390.8	78204.1	42142.4	67921.4	71080	73297.4	57225.9	55724.2	67381.2	1.20919	0.274042	0.242256
ARRB1	287816	272422	294346	237621	255242	280800	269411	268877	273051	268583	0.983635	-0.0238055	0.760822
ARRB2	181855	162459	186352	162848	168508	180094	172062	180856	173378	175380	1.01154	0.0165604	0.786785
ARRDC1	84331.1	77140.6	83940.6	77891.9	70298.6	86452.5	79245.7	79134.7	80826.1	78782.9	0.974721	-0.0369386	0.616712
ARSA	50702.7	54009.4	51858.2	46525.4	49063	51525	45098.2	47979.4	50773.9	48416.4	0.953568	-0.068592	0.297421
ARSB	207967	212735	234014	193165	211754	236192	224434	224990	211970	224342	1.05837	0.0818416	0.264405
ARV1	25247.8	20688.2	44949	36916	45154.6	32366.3	43744.1	43851.6	31950.3	41279.2	1.29198	0.369585	0.201926
ASAH1	333561	362844	409010	323701	423319	439996	394614	363563	357279	405373	1.13461	0.1822	0.108683
ASAP1	92553.7	119432	94946.7	94487.5	96532.9	103251	95019.7	85878.3	100355	95170.4	0.948339	-0.0765251	0.511922
ASB1	20247.6	32964.4	30940.6	19247.8	23475.9	31958	26890.5	26018.4	25850.1	27085.7	1.0478	0.0673603	0.769968
ASB3	13941.8	16128.5	19218.3	13267.1	16569	16082	16811.9	16383.5	15638.9	16461.6	1.0526	0.0739623	0.584073
ASB6	41462.8	1	50057	40731.1	42612.5	43752.8	44319.6	46290.7	33063	44243.9	1.33817	0.420263	0.392875
ASCC1	147175	150903	171872	137382	142299	166820	160016	143263	151833	153100	1.00834	0.011984	0.898402
ASCC2	190568	212606	220700	207943	220345	225517	222388	210241	207954	219623	1.05611	0.0787627	0.171046
ASCC3	202523	202574	198411	175211	197914	205704	196574	209035	194680	202307	1.03918	0.0554415	0.347671
ASDURF	30627.8	36292.6	39237.4	25961.2	35461.5	37999.2	32465.2	24787.6	33029.7	32678.4	0.989363	-0.0154279	0.934754
ASF1A	260986	281070	313584	254560	291524	309744	271250	266252	277550	284693	1.02573	0.0366578	0.683225
ASF1B	455117	483392	514598	417178	501145	514711	500733	445470	467571	490515	1.04907	0.0691113	0.410864
ASH2L	195521	198672	245507	203978	208392	231821	221436	222225	210920	220968	1.04764	0.0671462	0.470347
ASL	30954.5	31184.2	35017.9	28177.3	33805.4	36649.5	36832.2	31230.9	31333.5	34629.5	1.10519	0.144296	0.139306
ASMTL	123838	146183	131015	118843	114218	115467	119869	130358	129970	119978	0.923124	-0.115403	0.212501
ASNS	940702	992383	1124484	865855	1.14437e+06	1.24565e+06	1.213e+06	1.20606e+06	980856	1.20227e+06	1.22574	0.293648	0.0203381
ASNSD1	12589.2	16158.1	13664.6	10036.5	13772.4	13843.6	14281.2	12929.1	13112.1	13706.6	1.04534	0.0639691	0.675893
ASPH	44377.6	58713.8	53327.2	46322	52157.1	53521	53297	45644.3	50685.1	51154.9	1.00927	0.0133085	0.906302
ASPM	22017.2	24377.1	19418.8	18255.9	19658.3	20427.1	19643.4	22069.9	21017.3	20449.7	0.972995	-0.0394957	0.721242
ASPSCR1	264326	307276	271834	285527	262053	265236	282877	273526	282241	270923	0.959899	-0.0590454	0.337515
ASRGL1	176323	227753	160841	155106	193603	205339	149980	200058	180006	187245	1.04021	0.05688	0.74073
ASS1	42504.6	34974.5	38297.5	28930.5	39558.9	51480.3	47013.4	42797.4	36176.8	45212.5	1.24977	0.321658	0.0582243
ASXL1	17841.2	19192.7	20433.7	17500.3	18579.2	16909.6	19784.4	18842.9	18741.9	18529	0.988639	-0.0164843	0.820929
ASXL2	29788.6	42851.6	26728.2	27514	29466.7	30220.1	28596	27840.6	31720.6	29030.9	0.915206	-0.127831	0.528587
ATAD1	336200	320217	329868	299123	332911	315196	348507	358666	321352	338820	1.05436	0.076367	0.212284
ATAD2	234422	258022	212176	236494	212378	209130	196361	211918	235279	207447	0.881706	-0.18163	0.0518268
ATAD2B	56409.8	58110.3	56008.1	60785.6	52012.5	55503.4	49007.7	51296.7	57828.4	51955.1	0.898435	-0.154515	0.0155558
ATAD3A	472530	534576	544533	461046	483331	565316	540602	491949	503171	520300	1.03404	0.0482933	0.575118
ATAD3B	66598.9	77776.2	86494.7	54417.9	68177.7	85372.9	75614.1	91480.6	71321.9	80161.3	1.12394	0.168561	0.349792
ATAD5	78653	79209.7	74280.6	69995.8	70121.2	77898.7	74571.2	71497.2	75534.8	73522.1	0.973354	-0.0389632	0.494519
ATE1	47754	52082.8	50963.7	44190.6	47186.9	51554.7	46999.1	49188.5	48747.8	48732.3	0.999683	-0.00045738	0.994334
ATF2	15076.3	1	14029.9	14004.6	21882.2	17337.2	23950.1	19852.5	10777.9	20755.5	1.92574	0.945411	0.0628826
ATF6	17188.7	21080.1	18423.6	16970.6	21131.1	22056.7	21078.3	18725.3	18415.7	20747.8	1.12664	0.172022	0.0995146
ATF6B	70434	84632.4	56998.9	49127.9	75522.6	84741.8	76912.2	70421.9	65298.3	76899.6	1.17767	0.235931	0.239531
ATF7	19540.8	15520.4	21157.4	17021.1	26279.1	21870.3	23177.6	23487.2	18309.9	23703.5	1.29457	0.372477	0.0156645
ATF7IP	78202.4	57017.7	70692	75352.6	82256.3	77326.6	77148.6	86114	70316.2	80711.4	1.14783	0.198915	0.110999
ATG101	108704	114638	133131	102068	111973	130761	118099	130957	114635	122948	1.07251	0.100992	0.353222
ATG13	55047.2	46976.7	60518	54284.6	56761.6	59208.7	57840	56427.8	54206.6	57559.5	1.06185	0.0865853	0.317298
ATG14	1	1	1	4312.37	1	1	6916.17	1	1078.84	1729.79	1.60338	0.681116	0.762185
ATG16L1	78782.7	54698.4	97128.8	69546.4	87797.4	96997	97817.3	96115.1	75039.1	94681.7	1.26177	0.335444	0.110936
ATG2A	98835	105498	84387.4	87409.9	80761.9	88488	77211.2	84879.2	94032.6	82835.1	0.880919	-0.182919	0.105263
ATG2B	29634.4	31748.2	28001.2	28507.4	27991.5	31110.4	29311.7	31176.6	29472.8	29897.6	1.01441	0.0206445	0.720523
ATG3	389666	476897	467966	378222	484172	467843	459336	438392	428188	462436	1.07998	0.111009	0.282981
ATG4A	24982.9	1	23031.7	20225.3	27011.8	20526.5	31333.4	31301.9	17060.2	27543.4	1.61448	0.691072	0.169636
ATG4B	138852	127699	147934	120711	131759	129735	133407	142935	133799	134459	1.00493	0.00709774	0.925767
ATG4C	17314.6	31871.1	23531.6	17380	18848.4	23149.1	22327.1	17742.6	22524.3	20516.8	0.910872	-0.13468	0.615573
ATG5	46276.8	48213.9	56759.2	50184.5	49524.2	52563.9	50232.1	46392.5	50358.6	49678.2	0.986488	-0.0196259	0.805304
ATG7	710084	617859	711052	565898	676889	698102	678160	684930	651224	684520	1.05113	0.0719398	0.423271
ATG9A	61281.1	36728.9	58828	54709.8	57540.8	51122.7	60558	61467.3	52887	57672.2	1.09048	0.124963	0.471291
ATIC	3115607	3.3363e+06	3.4623e+06	3047839	3310467	3.43309e+06	3.40581e+06	3.16558e+06	3.24051e+06	3.32874e+06	1.02723	0.0387525	0.472215
ATL1	9204.94	1	18440.4	1	9150.94	9463.1	15919	18181.3	6911.84	13178.6	1.90667	0.931053	0.268658
ATL2	145066	162422	153177	135172	153893	153378	144765	146862	148959	149725	1.00514	0.00739498	0.908447
ATL3	395476	362544	411802	362733	388256	398622	378589	391007	383139	389119	1.01561	0.0223433	0.670823
ATM	50517.1	51163.8	53432.4	42213.7	52797.4	56569.5	55718.8	53683.8	49331.8	54692.4	1.10866	0.148823	0.113351
ATOX1	7963.77	1	5624.15	8383.31	5778.59	5630.82	4795.17	7949.15	5493.06	6038.43	1.09928	0.136564	0.803615
ATP11A	25287.4	31389.6	26449.9	26360.7	27760.3	26866.4	26979.2	28809.5	27371.9	27603.9	1.00847	0.0121724	0.880322
ATP11B	85106.2	85176.5	86509.7	75799.9	84171	90848.9	89342.2	83596.2	83148.1	86989.6	1.0462	0.0651591	0.261306
ATP11C	30501.4	34687.1	37644	29085.9	31310.8	28934.8	33365.4	31629.1	32979.6	31310	0.949375	-0.0749506	0.480197
ATP13A1	400310	341770	402967	361750	371453	372850	386142	385084	376699	378882	1.0058	0.00833705	0.895749
ATP13A3	115292	102285	121503	102745	118868	124340	119478	121565	110456	121063	1.09603	0.132282	0.109126
ATP1A1	2.34467e+06	2.6423e+06	2.53615e+06	2.28472e+06	2.40655e+06	2.49429e+06	2426933	2.31656e+06	2.45196e+06	2.41108e+06	0.983329	-0.0242532	0.675216
ATP1A3	22460.6	15878	36459	19899.2	12347	25629.6	15098.8	16459.8	23674.2	17383.8	0.734294	-0.445569	0.288863
ATP1B3	923922	930800	988068	789559	1.01849e+06	1.01148e+06	959340	928186	908087	979373	1.0785	0.109028	0.198432
ATP23	20797.1	36012	15066	25595.1	15420.2	28164.1	22490.3	14876.5	24367.6	20237.8	0.83052	-0.267912	0.480103
ATP2A2	1.84381e+06	2.21879e+06	1.77219e+06	1.63748e+06	1.73293e+06	1.69195e+06	1.66487e+06	1777923	1868068	1.71692e+06	0.919089	-0.121724	0.313642
ATP2A3	654837	690159	673749	523268	674074	668833	673081	634809	635503	662699	1.04279	0.0604551	0.533092
ATP2B1	122964	140970	136428	123664	134638	135044	133305	127634	131007	132655	1.01258	0.0180427	0.751791
ATP2B4	127138	136583	131782	108974	132107	126310	132745	135257	126119	131605	1.04349	0.0614193	0.439747
ATP2C1	75409	102580	79937.4	73191.7	67613.3	67361.3	71536.1	73104.9	82779.6	69903.9	0.844458	-0.243903	0.15116
ATP5F1A	21154581	23047247	23386527	21217431	23215569	25221117	25091271	22652371	2.22014e+07	24045082	1.08304	0.115088	0.0814438
ATP5F1B	13532854	14401088	14481410	14515628	16134271	16881597	16408657	14723785	14232745	1.60371e+07	1.12677	0.172197	0.0216525
ATP5F1C	4.23515e+06	4.11826e+06	4.70336e+06	4.03741e+06	4.17178e+06	4656987	4.6938e+06	4514491	4273545	4.50926e+06	1.05516	0.0774589	0.264514
ATP5F1D	130145	133068	146237	149145	192150	153545	179290	154826	139649	169953	1.217	0.28333	0.0409565
ATP5F1E;ATP5F1EP2	1.18784e+06	1192370	1.21889e+06	1.22381e+06	1.24011e+06	1.06394e+06	1.25337e+06	1.75454e+06	1.20573e+06	1.32799e+06	1.1014	0.139341	0.471268
ATP5IF1	23082.9	37029.6	42636.4	30435.4	48103.8	43932.3	44960.2	27303.9	33296.1	41075	1.23363	0.30291	0.263404
ATP5ME	1.36333e+06	1320033	1.80152e+06	1.49136e+06	1.52983e+06	1.60772e+06	1.55086e+06	1.68843e+06	1.49406e+06	1.59421e+06	1.06703	0.0936055	0.435344
ATP5MF	1206464	637873	1428452	1.29457e+06	1.60205e+06	1.5366e+06	1.57217e+06	1.36208e+06	1.14184e+06	1.51822e+06	1.32963	0.411026	0.116169
ATP5MG	3.72398e+06	3.73221e+06	4.01942e+06	3540201	3.97021e+06	4.09213e+06	4261127	3.7025e+06	3.75395e+06	4.00649e+06	1.06727	0.0939291	0.152884
ATP5MJ	904495	3.82117e+06	947574	522887	1.05648e+06	990114	678532	968987	1.54903e+06	923529	0.596198	-0.746136	0.473718
ATP5MK	1.13853e+06	1288536	1.50516e+06	1.08757e+06	1.33485e+06	1.26402e+06	1.28533e+06	1.21854e+06	1.25495e+06	1.27568e+06	1.01652	0.023643	0.842513
ATP5PB	2.23533e+06	2.36945e+06	2.5735e+06	2.09469e+06	2.42123e+06	2.69543e+06	2.67712e+06	2497863	2.31825e+06	2.57291e+06	1.10985	0.150368	0.0893777
ATP5PD	39509.6	51215.9	54697.3	49759.6	58347.6	52352	49648.6	47080.2	48795.6	51857.1	1.06274	0.0877912	0.481793
ATP5PF	33584.8	1	29293.4	1	1	1	40992.5	1	15720.1	10248.9	0.651962	-0.61714	0.70398
ATP5PO	3987953	4518355	4232337	3667136	4755039	4763037	4869164	4281934	4.10145e+06	4.66729e+06	1.13796	0.186454	0.0482328
ATP6AP1	220479	271584	216699	215253	217871	245138	193064	193905	231004	212494	0.919874	-0.120493	0.3517
ATP6AP2	136769	158657	174322	129178	148346	181282	158438	132513	149731	155145	1.03615	0.0512396	0.721948
ATP6V0A1	196228	165342	226027	166086	189220	205060	199630	194979	188421	197222	1.04671	0.0658635	0.591086
ATP6V0A2	80813	75090.3	85447.7	67456.9	80548.7	74271.7	78888.6	77570.4	77202	77819.9	1.008	0.0115004	0.888067
ATP6V0C	164547	1	190571	710715	356632	286970	227099	257760	266458	282115	1.05876	0.0823743	0.926237
ATP6V0D1	595927	509378	636713	513064	538907	586394	600638	580696	563770	576659	1.02286	0.0326102	0.724901
ATP6V0D2	23912.9	1	60293.6	29042.3	27179	43061.3	50084	38117.5	28312.4	39610.4	1.39905	0.484444	0.444778
ATP6V1A	940596	1038555	1.10244e+06	827977	974240	1.08876e+06	1076378	1.01536e+06	977392	1.03868e+06	1.06271	0.0877488	0.401344
ATP6V1B2	1.09099e+06	1.02956e+06	1.25486e+06	940320	1.07566e+06	1.14221e+06	1.15174e+06	1127586	1.07893e+06	1124300	1.04205	0.0594222	0.549674
ATP6V1C1	218452	258360	220591	207395	228756	226039	230048	196259	226200	220276	0.973811	-0.0382864	0.682261
ATP6V1D	258769	297347	301222	253468	286264	316938	294574	274871	277702	293161	1.05567	0.07816	0.357286
ATP6V1E1	422266	591635	449638	335270	466085	454404	447696	427022	449702	448802	0.997998	-0.00289117	0.987666
ATP6V1F	1	26695.8	1	15377	20211	1	1	1	10518.7	5053.49	0.48043	-1.0576	0.532787
ATP6V1G1	259703	189122	209389	225513	195277	155993	200202	314961	220932	216608	0.980431	-0.0285122	0.913299
ATP6V1G2	239381	328096	292453	197558	312099	290769	305701	284704	264372	298318	1.1284	0.174282	0.326135
ATP6V1H	842899	1074629	900635	749597	898562	927951	914710	891325	891940	908137	1.01816	0.0259639	0.828823
ATP7A	7017.47	31902.5	36122.7	13415.3	22102	20143.1	12701	10589.6	22114.5	16383.9	0.740868	-0.432712	0.492525
ATP7B	16916.8	1	4790.42	34105.6	28116.7	82421.1	46978.3	101820	13953.5	64833.9	4.64644	2.21613	0.0475685
ATP8A1	18423.4	1	9644.87	13488.7	14210.9	15934.2	8635.49	17216.9	10389.5	13999.4	1.34745	0.430237	0.448442
ATP8B4	12710	17069.2	27259.5	11287.1	15442.5	27159.7	22309.4	17214.8	17081.4	20531.6	1.20198	0.265416	0.47248
ATP9B	22494.3	32496.8	33067.5	26702.8	33876.6	30839.3	36688.2	30352.2	28690.4	32939.1	1.14809	0.199235	0.206742
ATPAF1	66486.8	62437.1	67806.5	51456.9	63260.7	71437.2	69825.5	66668.2	62046.8	67797.9	1.09269	0.127883	0.230493
ATPAF2	76980	79629	65795.1	60911.3	65780.1	71957.6	64578.7	75561.9	70828.8	69469.6	0.980809	-0.0279557	0.803202
ATR	71180.3	85548.9	67907.3	59600.2	70715.5	71823.9	64599	63315.5	71059.2	67613.5	0.951509	-0.0717108	0.586154
ATRIP	193356	176083	189845	172676	187982	196939	195129	179177	182990	189807	1.03725	0.0527641	0.335363
ATRN	31401.1	34400.7	31019.1	31015.6	34303.8	34759.4	28763	41163.9	31959.1	34747.5	1.08725	0.120683	0.360213
ATRX	35677.8	40132.9	36537.7	36524.9	37434.5	39685.5	38463	36569.7	37218.3	38038.2	1.02203	0.0314342	0.522732
ATXN10	696525	769377	636347	714266	691540	666725	637699	682007	704129	669493	0.95081	-0.0727715	0.30905
ATXN2	420237	436126	435024	377819	432718	423099	449253	419472	417301	431136	1.03315	0.047052	0.409943
ATXN2L	718477	767872	784688	676200	788750	801430	793996	754158	736809	784583	1.06484	0.0906358	0.147655
ATXN3	34274.3	118648	79297.2	41597.1	70218	75866.2	74590.9	66121.7	68454.1	71699.2	1.0474	0.0668193	0.878461
ATXN7L3B	189795	1	255352	98815.8	272089	223565	223047	213565	135991	233066	1.71384	0.777231	0.178278
AUH	20838.5	1	1	22069.9	25168.5	1	25940.9	17578.6	10727.6	17172.3	1.60075	0.678752	0.484176
AUP1	302218	327634	358958	292214	352763	365992	336045	296036	320256	337709	1.0545	0.0765555	0.443325
AURKA	123576	121349	120178	109467	115921	125841	118743	120170	118642	120169	1.01286	0.0184381	0.701625
AURKB	193228	191867	218283	172458	191646	206098	207624	210801	193959	204042	1.05199	0.0731154	0.381215
AVEN	3157.41	1	1508.38	1	4534.63	4898.12	3984.19	2219.92	1166.95	3909.22	3.34995	1.74414	0.0305234
AVL9	166799	179690	177235	148132	183054	179323	176554	173207	167964	178034	1.05995	0.0840021	0.258409
AZU1	229213	232661	195827	335567	181234	101017	190433	336784	248317	202367	0.814954	-0.29521	0.46177
B2M	288217	279355	496315	341728	406151	364884	438144	348470	351403	389412	1.10816	0.14817	0.52199
B3GALNT1	168900	1	199934	172766	201749	134961	42660.8	32861.4	135400	103058	0.761137	-0.393772	0.614138
B3GALT6	37063.1	41662.3	39053.3	37990.2	40587.8	40575.3	34836.9	39094.9	38942.2	38773.7	0.995673	-0.0062567	0.923789
B3GAT3	89383.8	95283.1	102619	85116.9	94749	92434.6	91269.4	80873.8	93100.7	89831.7	0.964887	-0.0515679	0.529184
B3GLCT	59633	73977.7	80087.9	49255.7	69056.4	73436.9	76738.4	41465.9	65738.6	65174.4	0.991418	-0.0124347	0.959519
B3GNT2	58925.6	43131.8	79445	45735.1	56035.4	57388.2	68682.9	66057.8	56809.4	62041.1	1.09209	0.127095	0.588345
B3GNT8	66279	70658.2	84576.8	60954.2	85931.8	80264.3	79617.7	85417.2	70617	82807.7	1.17263	0.229749	0.0904551
B4GALT1	176281	162107	181839	122189	192655	214187	197996	187395	160604	198058	1.23321	0.30242	0.0618155
B4GALT3	6272.64	1	1	13374.3	11854.8	13837.6	14693.8	14693.7	4912.25	13770	2.80319	1.48707	0.066006
B4GALT5	58650	74121.1	68800.1	62714.1	64019.8	71724.1	69007.4	27922.7	66071.3	58168.5	0.880389	-0.183786	0.506899
B4GALT7	35153.1	32893.2	43822.8	32569.7	38660.1	35404.8	43163	40240.7	36109.7	39367.1	1.09021	0.124604	0.340394
B4GAT1	70102.3	82489.4	88681.6	78931.2	82701.3	88619.1	94136.3	85358	80051.1	87703.7	1.0956	0.131715	0.15583
BABAM1	41771.6	46983.2	50175.6	36980.4	51453.3	55025.6	52368.1	48365.3	43977.7	51803.1	1.17794	0.236266	0.0674719
BABAM2	201435	185508	178786	184090	202565	180203	195136	200660	187455	194641	1.03834	0.054272	0.346306
BACH1	11913.4	10297.1	9806.38	11366.4	9983.15	9215.13	10655.6	13631	10845.8	10871.2	1.00234	0.00337302	0.982266
BAG1	70910.2	82623.6	76892.4	73893.8	76984.8	86924.9	80994.7	63557.9	76080	77115.6	1.01361	0.0195054	0.860298
BAG2	24920.2	29904.3	24788	22981.3	24394.4	26334	24012.8	23853.5	25648.4	24648.7	0.96102	-0.0573617	0.565276
BAG3	27210.2	42164.4	34177.1	34714.5	36922	34220.5	30858.4	24922.3	34566.6	31730.8	0.917962	-0.123493	0.505958
BAG4	8851.96	1	13180.4	6819.05	13497.4	1	13721.9	10324.9	7213.11	9386.3	1.30128	0.379936	0.626559
BAG5	97033.5	117927	101735	95258.7	97045.2	105244	104635	94722.1	102988	100411	0.974978	-0.0365578	0.677848
BAG6	218277	245135	242937	233848	271862	252670	258986	231059	235049	253644	1.07911	0.109841	0.131507
BAHCC1	25432.7	1	49361.7	38424.7	45150.5	50378	47579.2	37976.2	28305	45271	1.5994	0.677529	0.209201
BAIAP2	23933.6	43650.1	28110.4	23261.5	30442.7	30657.9	28228.7	27346.2	29738.9	29168.9	0.980833	-0.0279203	0.913116
BAIAP2L1	28426.8	18316.2	42482.6	35305.3	30592.6	42057.4	25211.3	41206.2	31132.7	34766.9	1.11673	0.159282	0.602168
BANF1	77894.9	70491.7	108888	111512	104445	117261	107376	94396.5	92196.7	105870	1.1483	0.199501	0.298741
BANP	20455.1	29854	29200.5	16108.7	19267.8	22474.5	26173.6	23038.1	23904.6	22738.5	0.95122	-0.0721487	0.765438
BAP1	66523	81684.3	74625.8	71408.2	71976.7	77269.4	76442.5	65881.5	73560.3	72892.5	0.990922	-0.0131573	0.876555
BAP18	38057.7	44614.7	80625	45058.2	30050.2	47092.4	24871.9	57626.4	52088.9	39910.2	0.766194	-0.384218	0.361134
BARD1	36752.5	33670.1	43353.7	36183	30157.1	51430	42305.8	47984.6	37489.8	42969.3	1.14616	0.196809	0.341623
BASP1	741054	382947	702645	3.0347e+06	215612	226334	169309	167041	1.21534e+06	194574	0.160099	-2.64297	0.193775
BAX	208399	785959	270664	253136	284441	241089	240116	206945	379540	243148	0.640639	-0.642417	0.391167
BAZ1A	228345	223877	216296	218029	213525	203908	216860	223864	221637	214539	0.967977	-0.0469556	0.211245
BAZ1B	1212751	1.19104e+06	1.34269e+06	1.1232e+06	1.18074e+06	1.22845e+06	1209846	1269667	1.21742e+06	1.22218e+06	1.00391	0.00562457	0.928186
BAZ2A	138952	114692	140268	110403	130567	136686	131327	136415	126079	133749	1.06084	0.0852018	0.405004
BBX	16365.7	22267.6	19191.6	16605.4	18431.1	18154.8	19844.3	20260.4	18607.6	19172.7	1.03037	0.0431594	0.721364
BCAP29	7590.23	9529.8	7592.89	6701.83	8095.84	8471.13	6869.66	10698.1	7853.69	8533.68	1.08658	0.119798	0.522529
BCAP31	323790	568402	382798	287512	391258	368279	373665	359034	390626	373059	0.955029	-0.0663831	0.797457
BCAR1	22189.8	25639.4	27441.6	20272.3	27055.6	25313.4	26362.6	24701.2	23885.8	25858.2	1.08257	0.114467	0.318433
BCAS2	78388.3	76419.6	109047	84986.2	106547	91311.4	88166.5	103096	87210.2	97280.3	1.11547	0.157649	0.302008
BCAS3	7081.8	1	7926.36	6716.3	8807.81	10328.4	12844.4	12179.2	5431.37	11040	2.03263	1.02335	0.0464165
BCAT1	335039	237796	279715	247496	346148	304092	289973	320568	275011	315195	1.14612	0.196754	0.173387
BCAT2	99229.2	61588.2	103114	63743.2	98535.3	105649	99837.9	106122	81918.6	102536	1.25168	0.323869	0.160824
BCCIP	315194	342127	299054	275562	306194	312564	309055	326353	307984	313542	1.01804	0.0258009	0.72632
BCKDHA	109662	80388.8	115846	76542.7	102292	110424	113391	107197	95610	108326	1.133	0.180146	0.296305
BCKDHB	155639	99826.2	139476	148143	141910	116010	129015	171432	135771	139592	1.02814	0.0400392	0.831369
BCKDK	114377	125873	138079	103569	110964	125237	128950	127519	120475	123167	1.02235	0.0318921	0.765054
BCL10	86449.9	148187	120346	100841	101365	113545	101442	92175.8	113956	102132	0.89624	-0.158043	0.452021
BCL2	117194	158232	135970	75797.6	149774	135480	160291	115857	121798	140351	1.15232	0.204543	0.397955
BCL2L13	98015.1	136080	113017	127269	125272	110001	116871	111745	118595	115972	0.977881	-0.0322694	0.785713
BCL7B	156625	138913	160613	163338	182270	179875	168514	171981	154872	175660	1.13423	0.181707	0.0234243
BCL7C	76237.5	76002.8	91137.1	52395.5	83760.4	90322.6	87705.9	88294.4	73943.2	87520.8	1.18362	0.243208	0.188195
BCLAF1	614367	604957	697634	509355	688764	647806	718330	663097	606578	679499	1.12022	0.163779	0.154843
BCOR	11582.2	13129.4	12837.7	10272.7	12495	13315	13108.3	12558.7	11955.5	12869.2	1.07643	0.106255	0.260545
BCORL1	23198.3	30668.5	31169.3	31060.4	30541.7	27978.6	40225.7	34469.9	29024.1	33304	1.14746	0.198441	0.246457
BCR	11996	18028.2	14277.5	10954	13552.6	14276.7	12800.4	12134.5	13813.9	13191.1	0.95491	-0.0665632	0.724918
BCS1L	283055	237293	277187	237770	268531	286322	278819	285628	258826	279825	1.08113	0.112542	0.188708
BDH1	141396	195558	206830	118889	130392	145109	160943	198195	165668	158660	0.957698	-0.062358	0.795225
BDH2	181736	165792	182724	155169	190253	170769	192936	196009	171355	187492	1.09417	0.129836	0.11596
BDP1	10819.7	1	16136.6	12670.8	11951.7	11946	10750	13445.1	9907.03	12023.2	1.2136	0.279295	0.588682
BECN1	38688.8	45897.9	39051.5	37448	45247.5	40097.8	38405.9	38907.9	40271.6	40664.8	1.00976	0.0140184	0.878862
BEND3	17161.9	22678.5	17651.5	16794.2	19364.5	21342	18269.7	15431.5	18571.5	18601.9	1.00164	0.00235768	0.987445
BET1	80480	84546.3	99970.1	72827.9	100082	101188	92588.2	89812.9	84456.1	95917.7	1.13571	0.183595	0.139949
BET1L	29163.7	1	37741.8	16925.6	43004	46407.4	45678.6	31969.6	20958	41764.9	1.99279	0.994789	0.0787262
BICD2	49202.4	62314.6	56534.5	46628	56653.1	55473.3	59961.5	53419.6	53669.9	56376.9	1.05044	0.0709899	0.518786
BICRA	17976.5	1	19534.4	1	20125.1	20734.3	22610.3	19348.1	9378.21	20704.4	2.20772	1.14256	0.127156
BID	52906.9	69614.9	57899.3	53347.1	56723.6	62658.3	46250.1	45273.6	58442.1	52726.4	0.9022	-0.148481	0.357163
BIN2	111595	129479	126932	105944	141187	135811	98128.7	93242.6	118487	117092	0.988225	-0.017088	0.923607
BIRC2	14679.1	25398.2	15217.9	16091.8	16998.4	19472.2	13100.4	19565	17846.8	17284	0.968466	-0.0462268	0.856481
BIRC5	8854.79	23564.6	7922.68	19461.8	14189	14585.1	13645.3	12949.3	14951	13842.2	0.925838	-0.111168	0.794439
BIRC6	294844	300152	282009	277180	268404	270735	274767	282966	288546	274218	0.950342	-0.0734818	0.0716676
BLM	33153.9	32104.3	32107.8	32242.6	31625.3	33357.7	36080.9	32797.6	32402.1	33465.4	1.03281	0.0465796	0.346933
BLMH	365149	320575	391642	349845	366664	360699	381314	395912	356803	376147	1.05422	0.0761705	0.306439
BLOC1S1	18728	81116.8	45707.7	46246.5	29968	42123.9	39036.6	30117.1	47949.7	35311.4	0.736425	-0.44139	0.400837
BLOC1S3	25890.3	30055.4	30289.3	26939.2	30779.6	33010.5	35143.2	32282.4	28293.5	32803.9	1.15941	0.213396	0.0208079
BLOC1S4	10731.5	17047.1	27839	21141.1	14943.9	20501.8	15131.3	11641.9	19189.7	15554.7	0.810577	-0.302978	0.413301
BLOC1S5	29849.7	53099.2	37182.4	54900.5	34919.5	34954.8	31437.3	37204	43758	34628.9	0.791374	-0.337569	0.232621
BLOC1S6	23393.5	9929.12	29683.7	14891.2	27336.1	27508.5	27143.2	28475	19474.4	27615.7	1.41805	0.503911	0.160829
BLTP2	50452.5	44465.1	50032.5	41795.9	44962.7	45784.7	44655	48007.7	46686.5	45852.5	0.982137	-0.0260035	0.731628
BLTP3A	28515.8	26043.3	27692.5	23058.3	28535.8	32995.1	31395.5	30819.6	26327.5	30936.5	1.17507	0.232742	0.024872
BLTP3B	33365.3	28371.3	35864.5	28854	32685.8	35484.2	33199.3	35147.8	31613.8	34129.3	1.07957	0.110457	0.266319
BLVRA	544894	561593	658776	541261	596288	611364	622478	631840	576631	615492	1.06739	0.0940931	0.2585
BLVRB	325318	407820	372262	322096	347564	373211	363103	370948	356874	363707	1.01915	0.0273606	0.766644
BMI1	49416.6	29765.3	33734.3	29295.6	42253.1	44128.4	40670.2	45189.8	35552.9	43060.4	1.21116	0.276393	0.210699
BMP2K	33666.9	29134	35078.4	31815.6	34745	35009.9	36246.9	35465.4	32423.7	35366.8	1.09077	0.125346	0.102663
BMS1	110686	100332	114160	96734.4	112935	114688	107043	103536	105478	109551	1.03861	0.0546531	0.441747
BMX	67710.6	82214.8	39331.5	58381.3	63427.4	67505.2	62174	38860.9	61909.5	57991.9	0.93672	-0.0943107	0.736784
BNIP1	179387	231259	205500	173088	199538	189991	170499	181944	197308	185493	0.940117	-0.0890875	0.463449
BNIP2	27730.4	1	36785.1	21738.4	34180.8	32601.2	30472.1	35845.6	21563.7	33274.9	1.5431	0.625829	0.231598
BOD1L1	165906	186585	159794	180779	175104	166510	173462	168349	173266	170857	0.986094	-0.0202035	0.734539
BOLA2B	184544	187326	216138	188510	216178	193117	217936	204809	194129	208010	1.0715	0.0996344	0.191496
BOLA3	24754.6	76388.2	41797.3	22594.1	36728.7	48932.6	29523.7	49551.6	41383.5	41184.1	0.995182	-0.0069675	0.988822
BOP1	369800	322704	399417	337811	367773	346505	374332	372820	357433	365358	1.02217	0.0316379	0.687692
BORCS6	6862.13	7932.88	9764.33	8671.26	8663.15	9378.24	8055.3	7225.88	8307.65	8330.64	1.00277	0.00398715	0.977018
BPGM	11370.3	1	4784.87	8763.51	13430.4	10388	12151.4	12011.9	6229.93	11995.4	1.92545	0.945198	0.0994071
BPHL	17394.4	1	17138.8	13853.3	16452.6	18577.4	18087.9	18559.4	12096.9	17919.3	1.48132	0.566883	0.252021
BPNT1	603386	579100	600891	563059	599564	518303	610791	634411	586609	590767	1.00709	0.0101909	0.885232
BPNT2	163744	248788	199231	155987	195779	207512	192648	194931	191938	197717	1.03011	0.042802	0.804015
BPTF	92181.4	86015	91791.3	80002.8	87608.1	94189.4	92909.7	89562.4	87497.6	91067.4	1.0408	0.0576907	0.325708
BRAF	2602.87	2179.59	3584.26	3096.4	2631.74	2925.36	4188.33	2092.82	2865.78	2959.56	1.03272	0.0464555	0.868187
BRAP	52951.5	77918.4	57138.9	46281.6	51249	54537.2	52912.4	53939.3	58572.6	53159.5	0.907582	-0.1399	0.486697
BRAT1	125907	160222	132108	105076	124821	116450	136224	140131	130828	129407	0.989136	-0.0157588	0.915237
BRCA1	28333.5	36159.8	27670.3	26821	30053.4	28782.3	29487.1	32985.3	29746.2	30327	1.01953	0.0279001	0.816714
BRCA2	50402	61979.3	53682.9	52044	52689.3	56766.1	53738.5	49488.5	54527	53170.6	0.975124	-0.036343	0.668571
BRCC3	177998	180227	203407	173996	188983	181209	200550	198412	183907	192289	1.04558	0.064297	0.340051
BRD1	119019	136592	121826	102078	113765	122008	121181	119103	119879	119014	0.992787	-0.0104437	0.912522
BRD2	70307.9	76999.7	79848.1	76512.8	74188.8	74256.3	73388.4	71988.7	75917.1	73455.5	0.967575	-0.0475542	0.311942
BRD3	159494	158206	175639	158461	170703	168978	176330	157231	162950	168310	1.0329	0.0466953	0.39396
BRD4	411849	392093	427346	406039	441233	447575	465941	436120	409332	447717	1.09378	0.129318	0.00795345
BRD7	86810.4	79422.9	97418.5	79683.1	81880.2	93627.7	79640.4	85348.9	85833.7	85124.3	0.991735	-0.0119737	0.896762
BRD8	24979.8	32620.5	27507.3	21948.4	29508.3	31105.5	28188.9	26293.7	26764	28774.1	1.07511	0.104478	0.461013
BRD9	22679.5	18677.8	26026.8	22268.9	21737.7	21950.5	23766	26042.3	22413.2	23374.1	1.04287	0.060564	0.61628
BRF1	17040.9	22583.8	26021.2	18834.7	21032.1	30154.6	24952.6	20342	21120.2	24120.3	1.14205	0.191628	0.358349
BRF2	5688.63	1	9295.2	7831.1	11880	7220.23	6382.54	9048.96	5703.98	8632.93	1.51349	0.597882	0.273507
BRI3BP	417024	470537	467062	486717	585494	531609	541817	427641	460335	521640	1.13317	0.18037	0.167035
BRIP1	65176.9	10934.1	79820.9	50735.9	68880.2	80054.6	77287.1	68967.7	51666.9	73797.4	1.42833	0.514328	0.232745
BRIX1	193262	172480	211856	177392	196852	189240	199346	196327	188747	195441	1.03546	0.0502777	0.512156
BRMS1	32717.1	28680.9	37190.6	30531.6	28495.1	34179.3	31308.8	38213.2	32280	33049.1	1.02383	0.0339692	0.790692
BROX	343263	306924	377979	318649	360008	378157	380329	373905	336704	373100	1.10809	0.148081	0.0996166
BRPF1	56949.9	63237.9	67818.2	52893.8	69981.9	71299	70517.2	59583.6	60224.9	67845.4	1.12653	0.17189	0.129121
BRPF3	15715	18172.6	21382.3	17880.1	25234.3	27671.9	23918.6	23786.9	18287.5	25152.9	1.37542	0.459868	0.0041015
BRSK2	28263.1	1	28621.5	20546.2	19184.2	12032	26726.7	19701.3	19358	19411	1.00274	0.00394848	0.994579
BRWD3	5640.85	1	16836.3	1	6646.42	7793.6	6268.12	12752.7	5619.78	8365.2	1.48853	0.573885	0.554122
BSDC1	11217.5	4276.88	19915	14179.6	17199.4	19314.2	17828.3	16800.5	12397.3	17785.6	1.43464	0.520688	0.196064
BSG	1.37569e+06	1.88078e+06	1536872	1.5337e+06	1.70064e+06	1.60786e+06	1564882	1.51621e+06	1.58176e+06	1.5974e+06	1.00989	0.0141932	0.89742
BST1	99928.9	122958	79673.7	80198.9	34231.3	35009.4	56466.6	99926.2	95689.8	56408.4	0.589492	-0.762456	0.0846521
BST2	23749.7	39181.2	44414.4	35873	22418.6	30495	25820.4	28603.8	35804.6	26834.4	0.74947	-0.416058	0.131581
BTAF1	171136	184994	183309	163796	178451	183691	189221	180764	175809	183032	1.04108	0.0580846	0.260816
BTBD1	10145.1	1	1	1	13595.3	1	1	1	2537.01	3399.58	1.33999	0.422225	0.846064
BTBD2	45547.7	45034.8	51812.5	42953.8	46146.2	53674.6	51709.8	45067.8	46337.2	49149.6	1.06069	0.0850078	0.359836
BTBD9	13564.2	7498.75	11313.8	13615.9	13301.1	14955.9	15314.5	13571.6	11498.2	14285.8	1.24244	0.313175	0.146339
BTF3	1.32948e+06	1.5083e+06	1469698	1.43689e+06	1.61431e+06	1.41092e+06	1.56999e+06	1.43379e+06	1.43609e+06	1.50725e+06	1.04955	0.0697747	0.305241
BTF3L4	497765	483828	443152	416505	449252	449897	500230	481977	460312	470339	1.02178	0.0310887	0.673256
BTK	293535	277592	308473	266162	287035	288310	294547	289124	286441	289754	1.01157	0.0165915	0.746236
BTN2A1	5710.63	5123.5	9340.53	10102.4	13110.4	9877.59	9675.14	8737.43	7569.26	10350.1	1.36739	0.451425	0.132147
BTRC	56476.1	79011.6	47707.1	45057.9	46971.8	61227.7	57063.4	52229.7	57063.2	54373.2	0.952859	-0.069665	0.762463
BUB1	128615	153081	137672	110375	133513	141414	130391	133399	132436	134679	1.01694	0.024233	0.82179
BUB1B	57176	56640.8	63043.7	59245.7	67042	73354.4	61071.2	59467.6	59026.5	65233.8	1.10516	0.144257	0.145156
BUB3	2312996	2.13065e+06	2.73249e+06	2.05489e+06	2.41541e+06	2486552	2.66575e+06	2.4626e+06	2.30776e+06	2.50758e+06	1.08659	0.119804	0.286621
BUD13	125181	143769	137098	118344	145556	151496	136220	138440	131098	142928	1.09024	0.12464	0.138622
BUD23	218125	179431	262240	201288	229801	229524	214832	244670	215271	229707	1.06706	0.0936403	0.483546
BUD31	364858	481010	366451	264760	275551	419990	334425	367021	369270	349247	0.945777	-0.0804287	0.722937
BYSL	481127	469537	487266	425932	492910	481889	496495	488083	465966	489844	1.05124	0.0720989	0.182531
BZW1	805859	903988	825007	743108	845470	813966	835098	800351	819490	823721	1.00516	0.00742893	0.909479
BZW2	1.80984e+06	1.97149e+06	1.63871e+06	1.77139e+06	1.80857e+06	1732905	1.63232e+06	1.84063e+06	1.79786e+06	1.75361e+06	0.975387	-0.0359533	0.614372
C11orf54	158114	200798	147864	173437	151470	146721	156255	186433	170053	160220	0.942173	-0.0859363	0.526783
C11orf68	180309	179071	163148	129912	176921	162828	171679	174196	163110	171406	1.05086	0.0715693	0.537598
C11orf98	191949	488364	303627	188431	279517	265138	309513	284888	293093	284764	0.971582	-0.0415917	0.913768
C12orf29	33653.1	50244.5	38608.6	32633.7	36340.8	40926.9	38489	43115.8	38785	39718.1	1.02406	0.0342992	0.839248
C12orf4	17079.9	17326.2	17205.1	18360.6	19501.9	23242.5	18497.6	18592.8	17492.9	19958.7	1.14096	0.190245	0.111632
C15orf39	13290.3	8374.44	10754.6	9094.79	8029.49	6756.41	12563.1	13726.2	10378.5	10268.8	0.989427	-0.0153348	0.958688
C16orf87	9860.01	7943.43	16184.6	15452.1	12659.5	16819.9	14533.1	13781.3	12360	14448.4	1.16896	0.225231	0.399459
C17orf75	63967.7	99517.9	86368	53966.9	80642.5	85689.3	85447.6	71568.9	75955.1	80837.1	1.06427	0.0898697	0.679407
C17orf80	30471.8	29499.8	29045.6	33630.1	28990.1	20459.4	28956.9	32143.4	30661.8	27637.5	0.901363	-0.149819	0.327259
C18orf21	55588.3	34289.5	66610.1	30846	70601.1	73950	69297.6	67646.9	46833.5	70373.9	1.50264	0.587501	0.0691666
C18orf25	9277.3	9810.92	12096.8	6466.59	9378.75	12200.7	13427.7	12474.2	9412.9	11870.3	1.26107	0.334649	0.144418
C19orf47	78062.4	69819.2	76307.1	71265.9	79564.6	81060.9	73732.2	74709.4	73863.7	77266.8	1.04607	0.0649838	0.249659
C19orf53	103290	101355	134013	103862	112198	113290	117558	123338	110630	116596	1.05393	0.075773	0.511679
C1D	98783.8	151119	122211	102432	112619	139665	138305	121678	118636	128067	1.07949	0.110351	0.523229
C1GALT1	40986	47558.7	47930.8	38046.6	43296.4	46955.1	47200.7	44786.7	43630.5	45559.7	1.04422	0.0624223	0.504118
C1GALT1C1	3419.58	3422.68	365.928	3219.17	4689.16	4220.17	1	4471.84	2606.84	3345.54	1.28337	0.359939	0.605771
C1orf112	15225.2	17096.4	11882.7	12121.2	14002.5	11526.5	14394.4	15803.1	14081.4	13931.6	0.989368	-0.0154215	0.926219
C1orf122	56434.2	58732.9	55786.2	57664.6	57938.1	65463.8	59944.8	55154.8	57154.5	59625.4	1.04323	0.0610599	0.346042
C1orf131	59022.6	52411.4	71155.6	54538.4	60651.9	69510.5	67020.1	59621.8	59282	64201.1	1.08298	0.115003	0.357531
C1orf159	1	1	28370.5	1	28880.3	1	1	19963.4	7093.38	12211.4	1.72153	0.783688	0.63255
C1orf174	27454.9	30820.5	23906.1	26575.2	33122.1	27580.5	31394.6	24453	27189.2	29137.6	1.07166	0.0998469	0.452515
C1orf52	31418.3	57992.4	56286.5	65719.1	60473.9	73146.9	50868.3	22641.8	52854.1	51782.7	0.97973	-0.0295436	0.937584
C1QBP	649791	636326	636991	688587	860853	793521	713517	674157	652924	760512	1.16478	0.220057	0.0770375
C20orf27	223220	183863	233324	149649	267090	260955	270032	203327	197514	250351	1.26751	0.341995	0.0793477
C2CD2	46943.8	61394.4	58167.2	58469	74111.8	43790.9	1	63381.1	56243.6	45321.2	0.805802	-0.311502	0.555954
C2CD2L	14130.8	13962.8	13479.6	13947.7	13550.6	14323.2	13769.6	13282.3	13880.2	13731.4	0.989277	-0.015553	0.593564
C2CD3	5950.05	1	1294.46	1	3715.72	1	4504.69	1	1811.63	2055.6	1.13467	0.182273	0.8996
C2CD5	48189.8	62147.8	50467.2	49074	50909.7	51564	51299.1	50489.7	52469.7	51065.6	0.973241	-0.0391312	0.696204
C2orf49	86451.2	88043.1	92249.7	82559.3	100324	91281.8	102597	87290.4	87325.8	95373.2	1.09215	0.127175	0.114489
C2orf69	20256.5	25135.5	26062.6	23508.9	22545.4	26423	25734.7	24562.7	23740.9	24816.4	1.0453	0.0639232	0.512777
C2orf76	49759.8	48724.4	54021	46152.2	52104	65347.7	60533.2	55734.4	49664.3	58429.8	1.17649	0.234495	0.0480152
C3	23355.5	1	17624.3	10089	15284.3	13865	19539.4	9667.78	12767.4	14589.1	1.14268	0.192422	0.754903
C3orf38	39421.4	50023.4	47580.1	40460.2	47270.4	45605.6	49586.4	53582.5	44371.3	49011.2	1.10457	0.143485	0.196658
C4A	24936.1	1	32609.1	37695.9	41958.3	47349.2	43186.5	51132.6	23810.5	45906.6	1.928	0.947105	0.0737205
C4orf33	17603.4	1	12061.6	18398.5	1	19175.9	30052.3	1	12016.1	12307.5	1.02425	0.0345693	0.974252
C5orf22	68361.8	105057	87856.1	81096.8	84815	83050.8	76308.7	86882.8	85592.8	82764.3	0.966954	-0.0484807	0.743098
C5orf24	9947.59	1	7828.68	15727.4	15049.7	6477.75	12274.6	19180.6	8376.17	13245.7	1.58135	0.661158	0.292474
C6orf120	45269.1	1	72427.7	42938.4	49434.7	65486.9	64211.3	65268.3	40159.1	61100.3	1.52146	0.605454	0.25858
C6orf89	37898.9	75782.7	54853.4	26804.6	43920	49949.9	52454.5	44094	48834.9	47604.6	0.974806	-0.0368128	0.916663
C7orf50	430732	430955	423041	455606	407500	415584	408568	408729	435083	410095	0.942567	-0.0853325	0.0345986
C8orf33	97116.1	106536	106212	113214	103974	113515	109593	106136	105770	108305	1.02397	0.0341686	0.544909
C8orf82	207736	128637	195641	190164	181655	148553	189233	225637	180545	186269	1.03171	0.0450359	0.817481
C9orf64	118797	121546	122041	107265	112659	120968	120389	128448	117412	120616	1.02728	0.0388335	0.523429
C9orf78	87637.7	95197	101071	74776	101656	101996	103090	88287.4	89670.4	98757.3	1.10134	0.139255	0.231244
CA1	11643.6	1	31686.6	15127.7	1	1	40255.8	1	14614.7	10064.7	0.68867	-0.538116	0.719798
CA2	8918936	10007638	10033648	8.05854e+06	9425547	10010273	9718077	9452199	9.25469e+06	9651524	1.04288	0.0605719	0.473786
CA5B	4920.38	1	1	1	1	9761.45	1	1	1230.85	2441.11	1.98328	0.987889	0.6786
CA8	191860	239796	183200	208143	184851	159312	174283	210639	205750	182272	0.88589	-0.174801	0.205662
CAAP1	1	1	21099	29492.4	45051	89594.6	1	1	12648.3	33661.9	2.66137	1.41217	0.411158
CAB39	601112	594037	564959	526952	609541	616458	574611	570784	571765	592849	1.03687	0.0522411	0.348976
CAB39L	688389	942600	766376	659000	795585	875681	817486	752269	764091	810255	1.06042	0.0846315	0.538583
CABIN1	20639.3	22144.3	22112.3	21147.9	20052.3	19939.1	19852.8	19908.4	21510.9	19938.2	0.926885	-0.109538	0.0232931
CACTIN	54719.6	54463.5	65598.8	56389.4	57364.6	59084.3	61603.6	58647.6	57792.8	59175	1.02392	0.0340983	0.647596
CACUL1	7999.09	1	11637.7	10040.8	10217.9	12651.2	13919.7	12364.2	7419.63	12288.2	1.65618	0.727858	0.154606
CACYBP	2.06439e+06	2.83796e+06	2.71924e+06	2.09502e+06	2.35656e+06	2.39928e+06	2.49126e+06	2312197	2.42915e+06	2.38982e+06	0.983809	-0.0235496	0.860596
CAD	1.49913e+06	1.3596e+06	1.58283e+06	1.39782e+06	1.40022e+06	1.4932e+06	1.48965e+06	1.49523e+06	1.45984e+06	1.46957e+06	1.00667	0.00958464	0.868989
CADM1	48548.6	1	42057.7	30418	24852.3	22109.3	20786.1	61779	30256.3	32381.7	1.07025	0.0979414	0.888896
CALCOCO1	10486.5	15213.1	14719	10133.4	13594.4	14910.6	13467.6	13963.5	12638	13984	1.10651	0.146015	0.397064
CALCOCO2	44252.8	47772	50026.4	39377	55827	49360.2	49376.6	48122.7	45357	50671.6	1.11717	0.159852	0.120611
CALM1;CALM2;CALM3	117642	139977	161605	112186	155349	141888	157335	137968	132853	148135	1.11503	0.157085	0.281016
CALR	3.83668e+06	3.76774e+06	4.45117e+06	4048968	4.49108e+06	4.52409e+06	4.57278e+06	4.1971e+06	4.02614e+06	4446262	1.10435	0.143196	0.0657992
CALU	144542	135867	198942	114961	212352	215729	198534	187198	148578	203453	1.36934	0.453477	0.0480355
CAMK1	36662.4	47675	12439.3	51506.7	52298.1	54479.9	12924.8	22452.8	37070.8	35538.9	0.958674	-0.0608874	0.914676
CAMK2B	149005	171458	180605	128499	149003	164793	159596	170753	157392	161036	1.02315	0.0330241	0.786658
CAMK2D	171571	157981	236640	190186	213806	262409	206992	283501	189094	241677	1.27808	0.353973	0.0834562
CAMK2G	94098	70215	105331	83193.6	96888.6	90219.4	97311.8	114766	88209.5	99796.4	1.13136	0.178054	0.25812
CAMKK2	26783.3	26780.1	29126.1	27920.5	29103.3	31438.1	30632.4	24721.7	27652.5	28973.9	1.04779	0.0673428	0.457044
CAMKMT	48469.2	45873.4	47517.4	49289.4	44820.6	45154.6	46009.4	47466.7	47787.4	45862.8	0.959726	-0.0593052	0.0891157
CAMKV	27299.3	38660.4	15668	36848.6	14587.6	17680.9	16261.6	18322.3	29619.1	16713.1	0.564268	-0.825547	0.0904198
CAMLG	17179.8	15532.6	26630.3	14345.4	20475.7	19707.1	19155.4	21124.4	18422	20115.7	1.09194	0.126888	0.58996
CAMSAP1	51797.2	61407.5	57598.2	51217.8	56739.9	57849.5	59103.9	52862.5	55505.2	56639	1.02043	0.029173	0.702012
CAMSAP3	18044.2	27884.6	17896.6	16678.6	21247.7	24915.3	27436.3	20016.2	20126	23403.9	1.16287	0.217685	0.338677
CAND1	1.25365e+06	1342073	1.17029e+06	1.25124e+06	1.22455e+06	1208916	1.24157e+06	1295306	1.25431e+06	1.24259e+06	0.99065	-0.0135524	0.781124
CAND2	72725.2	1	1	1	31033.4	1	1	2107.66	18182	8285.78	0.455712	-1.13381	0.641795
CANT1	47424.2	71132.3	68219.6	50014.5	51235.6	60244.8	58162.7	54100.9	59197.6	55936	0.944903	-0.081762	0.640952
CANX	5.34333e+06	4.939e+06	6.00093e+06	4665045	6.01466e+06	6.1906e+06	5990198	5811848	5.23708e+06	6.00183e+06	1.14603	0.19664	0.0739311
CAP1	5989331	6731753	6673621	6.1776e+06	6590899	6864509	6696904	6304827	6.39308e+06	6.61428e+06	1.0346	0.0490747	0.355187
CAPG	391880	621461	579763	490899	437721	448589	265563	705465	521001	464334	0.891235	-0.166122	0.610493
CAPN1	1.5417e+06	1.34338e+06	1.50831e+06	1.33013e+06	1.50497e+06	1.482e+06	1.50801e+06	1.5299e+06	1.43088e+06	1.50622e+06	1.05265	0.0740316	0.264058
CAPN2	263301	243739	280464	227015	261005	274297	269983	274800	253630	270021	1.06463	0.0903487	0.255771
CAPN7	59578.2	58116.2	67998.6	53339.7	62438.8	65719.8	61433.4	63246.7	59758.2	63209.7	1.05776	0.0810091	0.347086
CAPNS1	67691.3	98783.5	88258.8	76632.4	85481.2	82396.8	74296.8	68234.1	82841.5	77602.2	0.936755	-0.0942562	0.534143
CAPRIN1	886797	798051	1.03403e+06	687859	995932	981657	1.00908e+06	914754	851684	975355	1.14521	0.195609	0.189697
CAPRIN2	4729.76	1	12551.2	7449.28	7850.1	9695.55	8575.38	6537.33	6182.8	8164.59	1.32053	0.401119	0.511166
CAPZA1	3796407	3.86396e+06	3.99135e+06	3.79562e+06	3.97912e+06	4.04567e+06	3973331	3.77881e+06	3.86183e+06	3.94423e+06	1.02134	0.0304584	0.308193
CAPZA2	229956	167264	194932	173781	193381	184432	181166	186703	191483	186420	0.973559	-0.0386597	0.746236
CAPZB	2725829	2.88554e+06	2.7036e+06	2.5217e+06	2.77003e+06	2.65173e+06	2.63889e+06	2.73703e+06	2.70917e+06	2.69942e+06	0.996404	-0.00519733	0.910056
CARD11	1	1	179759	157712	126367	230753	1	141714	84368.3	124709	1.47815	0.563789	0.575757
CARD19	32227.6	52478.6	14024.7	43221.6	28116.8	29870	36201	31712.4	35488.1	31475.1	0.886918	-0.173127	0.664685
CARD6	18533.4	38991.5	18869.2	18913.7	21447.3	24670.9	22862.2	23901.6	23827	23220.5	0.974546	-0.0371973	0.912658
CARD8	41967	55097	62217.4	51896.5	59297.4	60758.4	61983.1	51706.5	52794.5	58436.3	1.10687	0.146479	0.29612
CARD9	123395	194017	140818	112495	117159	137775	128841	133793	142681	129392	0.90686	-0.141048	0.521796
CARHSP1	440534	296477	392546	407941	392147	374942	346594	531702	384375	411346	1.07017	0.0978407	0.620899
CARM1	246037	255111	267586	217977	227716	238229	249313	251495	246678	241688	0.979772	-0.0294823	0.693723
CARMIL1	9328.53	1	1	1	1	10327.5	16312.3	33080	2332.88	14930.2	6.3999	2.67805	0.166149
CARNMT1	25862.9	22626.5	30523.7	27766.9	28606.2	31612.2	29774.3	29780.9	26695	29943.4	1.12169	0.165669	0.143999
CARS1	892219	925155	982100	822471	950506	1.00042e+06	984407	970720	905486	976513	1.07844	0.108946	0.119806
CARS2	314989	319739	337725	280831	338099	348071	334662	326490	313321	336831	1.07503	0.104383	0.140888
CASC3	41489.2	51611.8	48098.8	46616.7	45644.1	47452.7	51124.7	46196.1	46954.1	47604.4	1.01385	0.0198428	0.80052
CASK	78773.9	84651.6	104472	79012.2	80015.2	88142.7	118708	89397.2	86727.5	94065.8	1.08461	0.117179	0.510393
CASP1	188327	141354	243110	186272	89064.8	97690.8	111672	145007	189766	110859	0.584187	-0.775499	0.0232829
CASP10	33825.2	54829.8	40538.3	31462.8	32725.6	36868.4	34515.3	36496.4	40164	35151.4	0.875196	-0.192321	0.413173
CASP2	48636.5	43264.1	49543.6	56757.7	48456.1	44808.4	55395.1	52176.2	49550.5	50209	1.01329	0.0190455	0.861006
CASP3	123580	173788	190956	120015	196275	160317	183645	169865	152085	177525	1.16728	0.22315	0.260211
CASP4	63083.3	74973.6	52551.2	76745.1	58300.5	21667.2	45458.9	78744.2	66838.3	51042.7	0.763675	-0.38897	0.294144
CASP6	54665.3	61950.6	61272.1	48650.7	54066.5	49533.3	49840.2	53845.8	56634.7	51821.4	0.915012	-0.128137	0.227079
CASP7	132277	150383	156813	136617	145353	150688	143472	152148	144022	147916	1.02703	0.0384798	0.56095
CASP8	308579	331875	314619	278012	318590	323588	326752	330329	308271	324815	1.05367	0.0754165	0.238127
CASP8AP2	1	1	8504.98	1	14603.3	10686.6	6936.86	12361.2	2127	11147	5.24072	2.38977	0.0165704
CASP9	45524.4	54450.3	47707.6	44559.5	44454.9	24846.2	47634.8	62012.1	48060.4	44737	0.930848	-0.103382	0.700916
CAST	69861.7	94520.2	67068.7	78734.1	82026.4	73880.5	75490	76973.6	77546.1	77092.6	0.994151	-0.00846246	0.947599
CASTOR2	85263.3	66217	93137.4	65966.3	88353.9	88379.2	87516.9	90855.8	77646	88776.4	1.14335	0.193265	0.203157
CAT	9550086	9811720	10455115	9548492	10400163	10544693	10600138	9922400	9.84135e+06	1.03668e+07	1.0534	0.0750488	0.097884
CBFA2T3	2402.3	1	1	1	11726	1	1	1466.35	601.326	3298.59	5.48553	2.45563	0.414789
CBFB	432660	478373	520404	441565	460920	474344	471581	463650	468251	467624	0.998662	-0.00193194	0.977175
CBL	137125	139147	147550	122313	156719	144883	149823	164540	136533	153991	1.12787	0.173596	0.0433774
CBLB	10524.4	18380.3	7316.45	1	10640.1	10519.6	11795.8	12439.1	9055.52	11348.6	1.25323	0.32565	0.591095
CBLL1	34186.9	45078.5	36594	33491.9	42227.8	39832.5	44614.5	39075.5	37337.8	41437.6	1.1098	0.150301	0.232045
CBR1	1.80236e+06	1.87043e+06	1.94716e+06	1742983	1.83736e+06	1.90499e+06	1.98413e+06	1.91441e+06	1.84073e+06	1.91022e+06	1.03775	0.0534608	0.245877
CBR3	796988	941237	937650	795407	941976	1.02786e+06	921840	894106	867821	946447	1.0906	0.125124	0.175814
CBR4	134431	98162.9	155423	103639	150112	144873	148973	142337	122914	146574	1.19249	0.253976	0.176618
CBS	25364.8	1	25885.1	1	1	32945.4	9732.23	1	12813	10669.9	0.832743	-0.264057	0.8483
CBX1	164230	224340	218496	184358	199436	222023	217094	190096	197856	207163	1.04704	0.0663121	0.590766
CBX2	52256.3	48014.5	50438.7	49401.4	55905.3	51807	61043.6	49534.1	50027.7	54572.5	1.09085	0.125447	0.170296
CBX3	1.66867e+06	1.76734e+06	1.64418e+06	1.71819e+06	1.55275e+06	1.65713e+06	1.62223e+06	1.81068e+06	1.6996e+06	1.6607e+06	0.977113	-0.0334028	0.555028
CBX4	162931	179138	195114	169481	168463	192429	183578	171041	176666	178877	1.01252	0.0179469	0.813565
CBX5	390928	444434	413838	360431	433872	399605	387991	450654	402408	418030	1.03882	0.0549488	0.523226
CBX8	70125.1	74060.6	71508.1	54924.6	70380.6	60950.2	69152.7	70732.1	67654.6	67803.9	1.00221	0.0031802	0.976971
CC2D1A	76454	81131.9	85879.2	72493.2	78063.7	85366.3	87203.7	72905.1	78989.6	80884.7	1.02399	0.0342043	0.681993
CC2D1B	88400.4	91508.9	89390.2	85608.7	96709.8	99204.5	98738	89778.9	88727.1	96107.8	1.08318	0.11528	0.034026
CCAR1	875079	888963	906529	765910	861183	907111	872917	876442	859120	879413	1.02362	0.0336809	0.577903
CCAR2	1.14175e+06	1.11114e+06	1.20889e+06	1078080	1.19014e+06	1256188	1.17918e+06	1.14253e+06	1.13496e+06	1.19201e+06	1.05026	0.070749	0.171078
CCDC106	1	1	1	10431.7	11422.2	1	23116.3	14809.2	2608.67	12337.2	4.7293	2.24163	0.13913
CCDC115	11615.2	26727.1	17297.8	18043.7	12515.5	17655.7	15270.1	13258.5	18421	14674.9	0.796643	-0.327994	0.325859
CCDC117	43204.4	45658.6	60404.9	42194.8	54681.3	52731.2	56747.6	52169.1	47865.7	54082.3	1.12988	0.176165	0.240543
CCDC12	55861.3	47444.2	65682.3	39261.8	70679.3	64748.6	68256.7	57424.8	52062.4	65277.3	1.25383	0.32634	0.0990268
CCDC124	333060	505550	463079	431582	426949	454985	451637	401890	433318	433865	1.00126	0.00182173	0.989452
CCDC127	62783.5	81916	66309.3	69598	61648	61002	70616.6	71415.9	70151.7	66170.6	0.943251	-0.0842866	0.461873
CCDC134	190833	215837	185119	203574	221219	209154	201302	199745	198841	207855	1.04533	0.0639621	0.330092
CCDC137	32460.7	49649.4	34701	28029.4	37719.2	45900.5	42108.8	36742.5	36210.1	40617.8	1.12172	0.165718	0.437917
CCDC174	32127.6	40617.3	38545.1	45936.9	45827.8	39568	40100.6	35994.2	39306.7	40372.7	1.02712	0.0386024	0.772388
CCDC183	1	1	9622.23	23809.3	15347.3	1	79996	1	8358.39	23836.3	2.85179	1.51187	0.48523
CCDC186	9250	26086	27165.1	11995.6	13971.9	16831.6	12775.7	5196.81	18624.2	12194	0.654741	-0.611005	0.282235
CCDC22	222896	254212	255711	220801	243708	269008	233660	228158	238405	243634	1.02193	0.0312988	0.705221
CCDC25	135695	112747	137196	120857	124568	126240	128192	143654	126624	130663	1.0319	0.0453098	0.604871
CCDC28A	9860.99	5075.2	10338.6	12275	13357.7	13369.2	15171.3	9295.36	9387.44	12798.4	1.36335	0.447157	0.136262
CCDC28B	1	1	1	5009.12	2741.77	1	1	1	1253.03	686.192	0.547627	-0.868736	0.708827
CCDC38	336477	1	306823	365017	388295	364916	358156	376768	252079	372034	1.47586	0.561555	0.252504
CCDC43	153877	287564	137783	176770	137797	151545	112732	171096	188998	143292	0.758168	-0.399411	0.276494
CCDC47	201322	229841	238221	178712	212246	219792	222119	225734	212024	219973	1.03749	0.0530963	0.604991
CCDC50	162874	177128	183537	144491	154671	172966	175564	170073	167007	168319	1.00785	0.0112833	0.899653
CCDC51	241841	276114	302339	237509	289124	301637	289645	267565	264451	286993	1.08524	0.118015	0.248619
CCDC59	88444.5	82452.7	114195	74565.5	96697	101831	99862.3	90328	89914.5	97179.6	1.0808	0.112099	0.467868
CCDC6	260714	287803	306439	206216	290019	309838	301968	257961	265293	289947	1.09293	0.128201	0.367124
CCDC71L	12856.2	1	11406.7	19624.1	1	1	1	15659.7	10972	3915.68	0.35688	-1.48649	0.258167
CCDC82	16645.6	1	67637.5	15200.7	29262.1	19303.5	26013	38270.7	24871.2	28212.3	1.13434	0.181851	0.839117
CCDC85C	11345.2	13318.2	20968	16402.6	24474.4	25283.9	22843.2	25643.8	15508.5	24561.3	1.58373	0.66333	0.018605
CCDC86	186240	209174	204386	209892	186233	193971	188569	187879	202423	189163	0.934492	-0.0977451	0.09193
CCDC88A	33561.9	41230.6	35968.5	33396.4	33935	34845.2	32698.4	32612.3	36039.4	33522.7	0.93017	-0.104434	0.265816
CCDC88B	52739.7	66440	47013.6	56031.1	69421.4	75179.8	69524	83372.6	55556.1	74374.5	1.33873	0.420862	0.0123665
CCDC88C	35632.6	51712.1	39864.4	43932.4	39521.4	35108.4	44237.7	44439.7	42785.4	40826.8	0.954222	-0.0676024	0.650943
CCDC9	92449.2	121866	110994	107165	105518	108036	103521	105140	108118	105554	0.976278	-0.0346354	0.703611
CCDC93	180152	200968	200358	174959	199666	198031	199617	188335	189109	196412	1.03862	0.0546633	0.37339
CCDC97	120668	111274	139614	103517	124320	138827	132926	125539	118768	130403	1.09796	0.134826	0.240802
CCM2	9254.92	1	11487.2	11095.2	6981.21	7609.98	11057.5	9465.06	7959.6	8778.43	1.10287	0.141268	0.789344
CCNA2	92946.9	94605.7	106167	83436.7	104741	106603	105110	100558	94289.1	104253	1.10567	0.144924	0.11937
CCNB1	332399	374103	339353	323643	375004	367634	366552	350871	342375	365015	1.06613	0.0923808	0.132584
CCNB2	122062	110765	118791	118092	125256	125555	128484	115845	117427	123785	1.05414	0.0760707	0.131874
CCNC	30448.4	21430.2	31540.7	24142	23363.5	27561.5	31068.9	25335.4	26890.3	26832.3	0.997843	-0.00311554	0.985033
CCND3	89073.5	102153	78153.3	97839.9	80494.3	38513.6	76150	103208	91804.8	74591.4	0.8125	-0.299561	0.299846
CCNDBP1	5977.26	1	33395	12806.6	16127.9	11073.2	17053.1	17298	13045	15388.1	1.17962	0.23832	0.771285
CCNE1	51481.6	1	74109.8	41161.9	46450.1	67766	56056	53947.4	41688.6	56054.9	1.34461	0.427188	0.430133
CCNF	12219.7	8372.74	9353.55	7682.24	14274.8	12079.7	13576.8	11695.6	9407.07	12906.7	1.37202	0.456307	0.0306608
CCNH	75210.9	82400.9	95715.1	58124.8	72968.7	70958.3	85145.4	83675.9	77862.9	78187.1	1.00416	0.00599418	0.971744
CCNK	534073	449042	560701	392491	526213	513438	532694	535669	484077	527003	1.08868	0.122576	0.34944
CCNL1	47483.3	33456.9	40875.8	39256.1	39348.8	39270.2	39850	43945.8	40268	40603.7	1.00834	0.0119761	0.918999
CCNL2	45577.7	39588.4	56779.4	38918.6	43846.3	43920.8	44903.2	43813.3	45216	44120.9	0.97578	-0.0353725	0.808522
CCNQ	13496	1	16543.9	11552.8	14576.9	13544.2	15719	17001.7	10398.4	15210.5	1.46277	0.548699	0.276858
CCNT1	117982	117545	126850	114184	118237	128573	128094	122291	119140	124299	1.0433	0.0611518	0.209488
CCNT2	37961.7	43403.5	41805.2	41117.8	37807.2	39322.9	38306.9	39579.4	41072	38754.1	0.943564	-0.0838074	0.133281
CCNY	7328.85	1	8437.36	8502.61	13199	10851.2	9112.18	15371.9	6067.46	12133.6	1.99978	0.99984	0.0542397
CCP110	11614.7	15647.7	17953	10268.4	13339.3	15884	13742.7	14323.7	13870.9	14322.4	1.03255	0.0462077	0.8217
CCPG1	30272.5	51075.8	44480.5	34713.9	29752	31282.6	36454.9	37851.8	40135.7	33835.3	0.843024	-0.246355	0.283616
CCS	9179.4	1	84788.9	10599.2	22233.4	8121.02	21263.3	39511.1	26142.1	22782.2	0.871476	-0.198467	0.879766
CCT2	4.55654e+06	6.18274e+06	5.30967e+06	4782415	4.86269e+06	5579712	5207021	4897688	5.20784e+06	5.13678e+06	0.986355	-0.0198217	0.866483
CCT3	10092595	12066392	10100922	10126127	10523305	10444179	10314979	10093698	10596509	1.0344e+07	0.976174	-0.0347893	0.645464
CCT4	5.83743e+06	6945342	6.08056e+06	6041210	5847889	6053699	5931766	6.01414e+06	6.22614e+06	5.96187e+06	0.957556	-0.0625711	0.363184
CCT5	3.12875e+06	3.88623e+06	3.64424e+06	3.18763e+06	3.36637e+06	3638127	3466391	3.33388e+06	3461711	3.45119e+06	0.996962	-0.00439016	0.959653
CCT6A	7187548	8371339	8508007	7759667	7795607	8.38264e+06	8420220	7745328	7.95664e+06	8.08595e+06	1.01625	0.0232577	0.730302
CCT6B	3127620	4.95698e+06	3.60258e+06	3059335	3.4652e+06	3780275	3.32826e+06	3.28502e+06	3.68663e+06	3.46469e+06	0.939799	-0.0895762	0.65513
CCT7	5.59167e+06	6305234	6451374	5688202	5808691	6023017	6139636	6.04491e+06	6.00912e+06	6.00406e+06	0.999158	-0.0012148	0.983407
CCT8	10831909	12143398	11110275	10607636	10678141	11295017	11010611	10381080	1.11733e+07	1.08412e+07	0.970278	-0.0435298	0.438009
CCZ1B;CCZ1	165942	173992	170952	151639	165774	167337	171888	163206	165631	167051	1.00857	0.0123172	0.801769
CD109	41320.8	60340.9	51326.5	31151.4	54925.1	53120.6	58227	34799.2	46034.9	50268	1.09195	0.126911	0.625142
CD151	71029.1	59453	39772.7	80920.3	42751.9	30556.9	38367.4	81227.4	62793.8	48225.9	0.768005	-0.380813	0.350876
CD180	62349.6	43179.1	42720.5	57597.1	29113.9	21061.2	25231.8	39662.9	51461.6	28767.5	0.559008	-0.839058	0.0131921
CD1D	30778.4	1	75766.1	35590.4	42844	16501.3	47866.5	41265.2	35534	37119.3	1.04461	0.0629687	0.930275
CD276	41566	60851.3	20409.2	55015.2	35648.2	43292.5	42464.2	46039.9	44460.4	41861.2	0.941538	-0.0869087	0.795003
CD2AP	207432	204381	176191	205510	197583	163630	189318	214832	198379	191341	0.964524	-0.0521112	0.609665
CD2BP2	195702	202302	205642	150016	235461	243535	230063	205249	188415	228577	1.21315	0.278763	0.0466949
CD300A	31890.6	64716	42901.1	24269.5	34821.3	40989.3	35060.8	37629.7	40944.3	37125.3	0.906727	-0.14126	0.695905
CD300LB	16378.2	15825	24971.9	19098.5	8258.47	1	8976.3	17952.3	19068.4	8797.01	0.46134	-1.1161	0.0617054
CD302	43505.5	1	1	40904	45595.9	25140	1	47910.2	21102.9	29661.8	1.40558	0.491166	0.622913
CD33	62611.4	73179.8	68638.1	52216.7	68392.6	68777	68841.2	68949.8	64161.5	68740.1	1.07136	0.0994447	0.386807
CD36	195503	218123	141345	221903	213773	254607	254632	170011	194219	223256	1.14951	0.201017	0.330766
CD37	773625	937093	833775	937399	647262	187226	210860	378591	870473	355985	0.408956	-1.28998	0.0114839
CD38	366202	323585	228405	320419	301125	305552	269925	326059	309653	300665	0.970976	-0.0424924	0.788205
CD44	1.05848e+06	1.10929e+06	1.08012e+06	996516	1.15484e+06	1.07133e+06	1.06997e+06	1.21287e+06	1.0611e+06	1.12725e+06	1.06234	0.087249	0.174214
CD46	89346.5	165012	60382.6	129421	74002.9	81281.4	123319	112227	111040	97707.5	0.879928	-0.184543	0.629596
CD47	338790	499758	443979	432545	448832	432586	420652	400926	428768	425749	0.992959	-0.0101939	0.935701
CD55	66256.1	75274.3	66907.2	91727.1	66288.1	62156.4	64346.1	83238.3	75041.2	69007.2	0.919591	-0.120935	0.460909
CD63	172786	1.06703e+06	213634	189509	249164	170455	215099	192503	410740	206805	0.503494	-0.989952	0.420779
CD68	108672	80055	45801.9	102887	104351	52949.4	35248.9	23257.9	84354.1	53951.7	0.639586	-0.644789	0.234179
CD70	255204	71876.8	309322	228144	248863	175939	233484	205094	216137	215845	0.998648	-0.00195115	0.995929
CD74	491867	973889	209673	348882	201470	241684	236642	205376	506078	221293	0.43727	-1.1934	0.185124
CD81	300851	333378	135734	382101	156128	99901.2	109227	329289	288016	173636	0.60287	-0.730081	0.180507
CD82	62871.7	185148	47790.9	33797	46590.3	47932.2	53986.7	23229.2	82402	42934.6	0.521038	-0.940539	0.341108
CD84	29568.1	23910.1	25489.2	30573.9	37502.5	37824.6	38696.7	37016.9	27385.3	37760.2	1.37885	0.463463	0.00595694
CD93	96826.7	85546.5	93221	99308.9	80158.5	71291	46033.5	74060	93725.8	67885.7	0.724302	-0.465337	0.0339285
CDAN1	56736	88516.6	66623.7	54835.6	52771.2	66875.4	56889.4	53276.9	66678	57453.2	0.861653	-0.214822	0.332616
CDC123	242775	289618	264916	243105	256848	279267	268057	266953	260103	267781	1.02952	0.0419704	0.557995
CDC16	143072	127784	142092	133017	138333	144063	126123	137853	136491	136593	1.00075	0.00107599	0.985195
CDC20	213775	175906	209915	163639	207948	209006	205941	223284	190809	211545	1.10867	0.148834	0.194774
CDC23	220021	212982	203637	212266	203928	200563	209025	216730	212227	207561	0.978017	-0.032068	0.374273
CDC25C	15930.1	1	10035.6	15110.3	23367.9	26508.9	23978	17533.8	10269.2	22847.2	2.22481	1.15369	0.0326005
CDC26	6675.06	32583.8	6939.11	26742.9	11249.3	9746.16	9400.34	1	18235.2	7599.2	0.416732	-1.26281	0.215088
CDC27	93375.4	99138	90462.6	85608.6	88602.4	93277.5	86736.5	92187.1	92146.2	90200.9	0.978889	-0.0307831	0.573514
CDC34	72851	96531.3	87533.4	83461.2	88649.2	96550.9	85043.6	83262.3	85094.2	88376.5	1.03857	0.0546019	0.591747
CDC37	1.88162e+06	2.97343e+06	2.42684e+06	1904325	2.22619e+06	2.28902e+06	2.43044e+06	2.13353e+06	2.29655e+06	2.2698e+06	0.98835	-0.0169059	0.925553
CDC40	109456	115754	117698	79216.7	101212	112525	115143	108914	105531	109448	1.03712	0.0525853	0.701333
CDC42	2.51973e+06	2.51953e+06	2649365	2.2991e+06	2.43588e+06	2.26069e+06	2.6194e+06	2.69611e+06	2.49693e+06	2.50302e+06	1.00244	0.00351282	0.961831
CDC42BPA	43952.2	91032.7	101279	92760.1	75946.7	97101.4	79304.8	76678.8	82256.1	82257.9	1.00002	3.24228e-05	0.9999
CDC42BPB	4192.6	1	3207.97	3549.86	4725.34	3831.69	5513.57	4855.15	2737.86	4731.44	1.72815	0.789232	0.119694
CDC42BPG	2054.36	1	1	1	1	1	3697.95	21677.7	514.34	6344.42	12.3351	3.62469	0.343255
CDC42EP4	58648.2	47964.8	74970.7	45110.8	73623.8	71750	69685.7	66605.3	56673.6	70416.2	1.24249	0.31323	0.133132
CDC42SE1	54280.2	23837.5	27023.5	36250.6	10882.2	1	10496.1	39502.2	35348	15220.4	0.430587	-1.21562	0.116291
CDC42SE2	37925.8	1	33606.8	12744.7	40910.6	39558.6	48379.7	1	21069.6	32212.5	1.52886	0.612458	0.460358
CDC45	97055.4	81951.7	98595	90972.6	90526.1	90833	87385.4	93372.7	92143.7	90529.3	0.98248	-0.0255002	0.707053
CDC5L	846857	984589	960364	847173	961820	963178	941760	876933	909746	935923	1.02877	0.0409262	0.560343
CDC6	79001.3	114160	91426.3	81545.2	106174	106248	88282.4	83810.4	91533.3	96128.7	1.0502	0.0706708	0.661503
CDC7	49538	42009.8	47369.3	46832.9	49203.6	51555.2	50659.5	48598.6	46437.5	50004.2	1.07681	0.10676	0.106646
CDC73	375509	362261	372505	343360	381574	388010	397605	373880	363409	385267	1.06015	0.0842658	0.0530567
CDCA2	46413.9	48749.3	44687.7	46972.5	47303.4	50474.8	46387.5	48946.3	46705.9	48278	1.03366	0.0477623	0.249211
CDCA3	23405	32548.7	25862.8	19670.7	26905.8	26557.6	27105.9	24799.4	25371.8	26342.2	1.03825	0.0541491	0.746917
CDCA5	161742	191235	185251	187165	188063	193779	202611	184318	181348	192193	1.0598	0.0837915	0.221853
CDCA7	63040.7	1	69256	48833	62406	72330.6	61526.1	59685.4	45282.7	63987	1.41306	0.49882	0.32065
CDCA7L	64823.7	52487.7	40019.9	55080.4	32009	40514.3	32799.1	26900.3	53102.9	33055.7	0.622483	-0.683894	0.0205966
CDCA8	251626	295374	284521	245968	283147	295397	300991	261480	269372	285254	1.05896	0.0826462	0.333348
CDCP1	17454.3	22527.9	19359.4	17639.3	19614.3	19692.1	9130.82	20292	19245.2	17182.3	0.89281	-0.163575	0.519785
CDHR1	1	1	8214.45	6701.75	8510.45	13320.3	12767.5	20257.3	3729.55	13713.9	3.67709	1.87856	0.0225541
CDIPT	42256.9	58145.2	34413.5	29000.5	41879.2	32883.2	39493.3	38921.6	40954	38294.3	0.935056	-0.0968749	0.711147
CDK1	1.89061e+06	2.04034e+06	2223511	1.59587e+06	2.09445e+06	2.13648e+06	2.10877e+06	2.06077e+06	1.93758e+06	2.10012e+06	1.08389	0.116213	0.308669
CDK10	599166	1	838847	451417	778597	692209	662044	891062	472357	755978	1.60044	0.678465	0.207593
CDK11B	345605	289606	346183	317622	354962	347613	348496	328940	324754	345002	1.06235	0.0872582	0.237557
CDK12	126964	125197	136384	121672	140820	116318	133748	140655	127554	132885	1.0418	0.059072	0.456319
CDK13	73570.9	62536.1	79604.5	68042.4	72109.2	77861	78672.3	80337	70938.5	77244.9	1.0889	0.122871	0.191011
CDK14	40020.5	36187.2	51579.4	35520.1	34697.9	34788.5	31428.2	30368.3	40826.8	32820.7	0.803901	-0.314909	0.117306
CDK16	22474.3	26502	22113.8	22067.7	26962.2	24378.9	19492.1	25579.4	23289.4	24103.1	1.03494	0.0495445	0.692891
CDK17	24182.2	1	13880.6	19991	23319.2	22578.2	24731.1	24995.8	14513.7	23906.1	1.64714	0.719961	0.172998
CDK19	68198.6	82268.6	73334.6	56827.4	62892.1	66383.3	71119.9	68634.3	70157.3	67257.4	0.958666	-0.0609005	0.633813
CDK2	746751	566370	784504	641426	776516	803775	788363	714600	684763	770814	1.12567	0.170778	0.184361
CDK2AP1	18115.9	45170.9	22409.6	20889.7	21503.2	27041.3	20272.2	22404.5	26646.5	22805.3	0.855845	-0.224578	0.587349
CDK4	57945.6	58929.4	64272.2	55957.3	63370.1	58548.4	61236	54784.6	59276.1	59484.8	1.00352	0.00506936	0.937835
CDK5	110594	118020	98528.3	94028.8	99909.5	103367	102398	96739.1	105293	100604	0.955465	-0.0657247	0.463517
CDK5RAP1	47246	35081.1	49282.8	38157	46118.6	48587.1	49213.8	43508.1	42441.8	46856.9	1.10403	0.142777	0.299282
CDK5RAP2	45668.4	61259.9	45029.9	41384.7	42425.9	46809.2	46865.4	46723.5	48335.7	45706	0.945595	-0.0807064	0.599219
CDK5RAP3	83652.3	106766	92921.3	82571.6	91462.4	98670.1	96644.2	98779	91477.7	96388.9	1.05369	0.0754466	0.454357
CDK6	716687	690666	737612	679312	726034	753676	717962	734393	706069	733016	1.03816	0.0540353	0.138018
CDK7	161786	135196	149986	153361	160006	144690	156854	153142	150082	153673	1.02393	0.0341104	0.602689
CDK8	1	1	1973.7	3337.08	1	1	1	3959.93	1328.19	990.733	0.745924	-0.422899	0.80153
CDK9	463149	494233	497785	442499	465113	495354	504152	484283	474417	487226	1.027	0.0384354	0.449324
CDKAL1	108251	127360	106102	102308	96599.6	106266	98569	101995	111005	100857	0.908583	-0.138309	0.16764
CDKN2AIP	239950	192743	238397	210449	246259	242630	235260	236199	220385	240087	1.0894	0.123535	0.183044
CDS2	59706.9	55212.8	49572.2	48417.3	59564.7	51975.1	50307.5	47843.8	53227.3	52422.8	0.984885	-0.021973	0.832451
CDT1	16179.9	1	14703.5	14115.4	15175	12835.8	12526.1	20991.8	11250	15382.2	1.36731	0.451341	0.380509
CDV3	1430117	1.5047e+06	1.27612e+06	1351487	1.47888e+06	1382467	1.40866e+06	1390974	1.39061e+06	1.41525e+06	1.01772	0.0253383	0.671024
CDYL	32726	26696	34875.2	28874.6	34911.6	38839.6	31672.3	35872.9	30792.9	35324.1	1.14715	0.198055	0.106003
CEBPA	131404	253955	139087	240389	148757	189375	252736	166322	191209	189297	0.990004	-0.0144935	0.963276
CEBPB	113427	104511	102917	133813	117828	57755.2	101112	118597	113667	98822.9	0.869407	-0.201896	0.399965
CEBPD	101654	209183	120519	108546	84325.2	102029	102049	90297.5	134976	94675	0.701424	-0.511642	0.205877
CEBPE	467104	935824	505496	503466	653170	785224	877672	704881	602972	755236	1.25252	0.324836	0.27692
CEBPG	7153.59	6643.37	8775.65	7939.26	7754.45	7960.32	7767.14	7433.61	7627.97	7728.88	1.01323	0.0189607	0.845343
CEBPZ	197062	198824	215491	185186	204289	216256	210381	211171	199141	210524	1.05716	0.0801988	0.166241
CELF1	128084	190969	155065	83857.4	128282	138323	137247	145756	139494	137402	0.985003	-0.0217993	0.932601
CELF2	279744	280261	307820	253411	296954	298759	321069	326966	280309	310937	1.10927	0.149604	0.0691882
CENATAC	25113.5	10911.5	32446.7	18352.9	34809.3	18159.6	37460.7	34039.8	21706.1	31117.3	1.43357	0.519616	0.18942
CENPA	17838.9	19594.3	23549.2	23315.8	24122.6	25082.7	22660.2	21684.9	21074.6	23387.6	1.10976	0.150242	0.212438
CENPB	148517	117890	140381	127377	136771	116796	151098	155338	133542	140001	1.04837	0.0681456	0.580854
CENPC	160862	169941	159814	153585	154125	166288	155921	147452	161051	155947	0.968309	-0.0464609	0.361031
CENPE	28702.7	41436.3	33828.1	31081	27972.5	30723.1	30312.4	28165.5	33762	29293.4	0.867643	-0.204827	0.20487
CENPF	92247.1	126014	93176.7	101651	92949.4	99498.5	91939.8	97517.5	103272	95476.3	0.924511	-0.113238	0.399356
CENPH	31769.8	40144	49242.9	39368.7	31388.9	40765.5	39340.4	34356.3	40131.4	36462.8	0.908586	-0.138306	0.421477
CENPI	17056.9	14116.5	17368.9	15049.1	19177.9	17143.7	14509.1	19686.5	15897.9	17629.3	1.10891	0.149142	0.273117
CENPJ	3963.9	8677.46	5224.29	5694.66	1	1	1	9858.03	5890.08	2465.26	0.418544	-1.25655	0.267842
CENPL	17402.3	1	17565.8	13342.4	16449.5	21361.2	17461.8	17327.6	12077.9	18150	1.50275	0.587606	0.240808
CENPM	28367.1	18369.8	28287	33677.8	26879.5	25836.1	28547.6	35795.9	27175.4	29264.8	1.07688	0.106864	0.614065
CENPN	15562.1	1	18175.1	14134.6	19797	18531.3	23171.6	17687.9	11968.2	19796.9	1.65413	0.72607	0.148964
CENPO	11154.4	1	9718.32	12289.7	14774.5	17894.4	12293.7	15427.4	8290.86	15097.5	1.82098	0.864718	0.0890512
CENPP	38727.4	32050.8	44061.3	36931.8	41150.9	43459	42429.7	40887.8	37942.8	41981.9	1.10645	0.145939	0.202066
CENPQ	31190.9	70706.2	42678.2	44288.8	39331.3	43744.4	41432.3	37519.1	47216	40506.8	0.857903	-0.221113	0.483193
CENPT	15413	13240.4	16029.9	17547.1	17629.6	15197.4	16786.6	14534.6	15557.6	16037	1.03082	0.0437888	0.689772
CENPU	57652.8	52175.4	60319.8	53703.4	61210.4	59467.6	57067.1	60451.2	55962.9	59549.1	1.06408	0.089609	0.151362
CENPV	194353	184207	201192	176813	164933	191552	184791	180138	189141	180354	0.95354	-0.0686353	0.3035
CEP131	26534.2	31831.1	29425	29037.8	30761	28599.2	29219.6	26898.3	29207.1	28869.5	0.988443	-0.0167705	0.811164
CEP170	81658.2	98761.5	89437.1	73140.4	103338	95166	102451	89367.5	85749.3	97580.7	1.13798	0.186471	0.123844
CEP192	51295.2	33367.4	46249.7	44016.8	39162.3	44791	46551.9	50549.1	43732.3	45263.6	1.03502	0.0496525	0.744892
CEP250	8926.05	11931.3	11541.6	8362.96	14567.9	4076.24	10305.5	14259.9	10190.5	10802.4	1.06005	0.084128	0.826365
CEP350	56298.1	88279.4	57224.6	58247.9	61234.7	60223	64880.2	62147.4	65012.5	62121.3	0.955529	-0.0656288	0.735734
CEP41	44508.5	40151.5	49930.6	37838.2	44730.2	48433.1	46262.8	47024.3	43107.2	46612.6	1.08132	0.112792	0.283564
CEP43	39739.6	33719.3	42572.7	35917.4	50046.5	46573.2	46422.7	38350.4	37987.3	45348.2	1.19377	0.25553	0.0612195
CEP44	39952.2	41007.3	42242.8	29945.1	41584.9	41963.1	43866.1	42092.1	38286.9	42376.6	1.10682	0.146417	0.243464
CEP55	46126.3	47496.2	49577.4	33816.5	49675.5	53050.5	53995.2	48173.4	44254.1	51223.7	1.15749	0.210999	0.143384
CEP57	29755.5	1	1	1	21710.7	1	19557.1	37481.8	7439.64	19687.6	2.64632	1.40399	0.295736
CEP76	46365.6	48412.7	45912	40238.4	42205.1	47179.7	48431.8	44975.4	45232.2	45698	1.0103	0.0147801	0.841225
CEP78	1	1	13982.5	1	1	1	8494.53	1801.74	3496.38	2574.57	0.736352	-0.441533	0.828758
CEP85	34787.1	46659.7	32690.6	36363.8	36153.1	34839.1	34319.6	36637.9	37625.3	35487.4	0.94318	-0.0843954	0.543558
CEP95	17279.7	1	14612.4	1	15660.6	16392.1	13577.7	15764.6	7973.52	15348.7	1.92496	0.944832	0.209753
CEP97	24202	1	14091.3	16779.5	16732.9	15952.5	17903.5	22688.5	13768.4	18319.3	1.33053	0.412001	0.443591
CEPT1	513777	347080	486320	449918	492729	452435	514055	541348	449274	500142	1.11322	0.154742	0.275991
CERS1	60395.2	38982.8	56599.9	43887.3	49761.1	48501.2	32549.1	45792.7	49966.3	44151	0.883617	-0.178508	0.403506
CERS2	361864	265543	358986	275892	397762	354527	354205	348142	315571	363659	1.15238	0.20462	0.163551
CERS4	2764.48	3029.95	2755.79	2829	3086.73	4587.15	3600.87	4573.32	2844.81	3962.02	1.39272	0.477904	0.055462
CERS5	40137.1	40981.4	45159.1	39308.8	43900.6	42197.4	37429.6	44240.7	41396.6	41942.1	1.01318	0.0188851	0.7982
CERS6	24289.8	19465.2	23387.1	19993.9	23827.8	23360.3	21468.4	24784.8	21784	23360.3	1.07236	0.100793	0.310833
CERT1	182518	168283	196020	158848	185745	190408	187089	197634	176417	190219	1.07823	0.108669	0.189685
CES1	472885	439183	132157	439070	582319	421959	572741	110628	370824	421912	1.13777	0.186208	0.721374
CES2	4368.68	1	7122.06	7400.33	1	8083.23	8677.72	5360.97	4723.02	5530.73	1.17102	0.227761	0.768489
CETN2	110127	1	152486	81446	150537	168074	135377	137582	86015	147892	1.71938	0.781886	0.148688
CETN3	1	1	1	1	1	10553	10232.4	2052.52	1	5709.73	5709.73	12.4792	0.12827
CFAP20	311742	289468	327364	268625	293019	292074	301683	316268	299300	300761	1.00488	0.00702643	0.921856
CFAP298	105110	111443	115812	81562.4	110442	117378	114609	110849	103482	113320	1.09507	0.131021	0.289752
CFAP36	7920.29	1	5525.7	4626.56	5295.25	5482.69	5260.8	2877.67	4518.39	4729.1	1.04664	0.0657593	0.911244
CFAP410	15309.4	14531	11782.1	13301.9	12257	13856.1	14725.5	11703.5	13731.1	13135.5	0.956626	-0.0639738	0.587915
CFAP97	18266	1	11390.5	16041.1	13660.3	21416	19043	22636.8	11424.7	19189	1.67961	0.748127	0.155681
CFD	261005	178740	159740	224844	176389	188068	181838	173166	206082	179865	0.872783	-0.196304	0.33558
CFDP1	150425	148532	170089	100281	150563	168325	158761	151170	142332	157205	1.1045	0.143388	0.396841
CFH	1	1	41891.4	1	29323.5	1	81303.6	1	10473.6	27657.3	2.64067	1.4009	0.469723
CFI	24976.9	1	1	19420.7	1	1	1	26432.5	11099.9	6608.87	0.595399	-0.748072	0.645383
CFL1	29394263	27551883	25718431	28034711	25917481	25365707	26079227	30362175	27674822	2.69311e+07	0.973128	-0.0392983	0.612655
CFL2	16627.7	30612.6	22577.8	29165.7	18793.8	25814.8	25715	17065.3	24745.9	21847.2	0.882861	-0.179742	0.493819
CFP	27268	21271.1	45462	27780.1	19553	19837.3	19140.4	20852.9	30445.3	19845.9	0.651854	-0.617379	0.134989
CGAS	48444.8	51294.9	49755.5	41082	48052.8	47222	47806.4	46232.6	47644.3	47328.5	0.993371	-0.00959573	0.898966
CGGBP1	300746	289706	384419	233548	339165	361435	367776	305106	302105	343371	1.13659	0.184718	0.291263
CHAC2	33961.5	34180.9	35921.8	36967.1	35004.6	39344	34972.4	34808.2	35257.8	36032.3	1.02197	0.0313483	0.581601
CHAF1A	149795	156969	146734	138691	137471	148092	150331	139373	148047	143817	0.971424	-0.0418267	0.425475
CHAF1B	245825	236115	268531	221362	234085	243703	263855	241185	242958	245707	1.01131	0.0162315	0.824468
CHAMP1	221904	233869	253922	206158	258635	263229	270461	232024	228963	256087	1.11846	0.161518	0.0854083
CHCHD1	51313.3	49374.4	88257.6	49343.5	75371.6	55702.6	72619.3	51970	59572.2	63915.9	1.07292	0.101536	0.715162
CHCHD2	820307	853901	895847	974995	822905	587363	847164	905455	886263	790722	0.892198	-0.164564	0.28088
CHCHD3	855221	963049	943043	850258	889369	905460	928897	960042	902892	920942	1.01999	0.0285561	0.610676
CHCHD4	89822.5	35573.6	83701.4	68595.2	91138.4	77971.9	80327.6	95831.9	69423.2	86317.4	1.24335	0.314235	0.263971
CHCHD6	74340.6	69157.3	76186.9	65222.7	76672.6	73195.9	71914.2	81127.9	71226.9	75727.6	1.06319	0.0883984	0.215289
CHCHD7	301588	1	237595	119872	185156	136379	192705	333542	164764	211945	1.28636	0.363292	0.575626
CHD1	157089	179030	167893	144237	154206	165555	151233	157114	162062	157027	0.968931	-0.0455341	0.565791
CHD1L	180336	170354	186687	159420	187773	195166	191903	189759	174199	191150	1.09731	0.133969	0.06127
CHD2	32475.8	51649.5	35414.1	30908.8	36379.7	38116.3	36493.1	31150.6	37612	35534.9	0.944776	-0.0819564	0.701723
CHD3	335556	364317	396006	285649	356771	373283	365988	359646	345382	363922	1.05368	0.0754363	0.488879
CHD4	723972	754986	803631	638782	795434	854352	792998	787256	730343	807510	1.10566	0.144906	0.109303
CHD6	9185.42	10645.2	7765.95	10339.1	9982.23	8244.72	10254.1	12039.2	9483.92	10130.1	1.06813	0.0950884	0.548463
CHD7	93712.9	98368	108230	87410.2	97336.2	101275	97653	93923	96930.2	97546.7	1.00636	0.00914675	0.901114
CHD8	95299.9	92349.3	104585	91706.3	95507.2	106264	102714	96511.2	95985.1	100249	1.04442	0.0627069	0.319641
CHD9	24338.7	1	60998.1	35955.8	47111.8	38287.5	1	65068.2	30323.4	37617.1	1.24053	0.310958	0.709759
CHDH	1	1	1	5320.8	1	1	1	13306.3	1330.95	3327.33	2.49996	1.32191	0.607507
CHEK1	227771	216988	236697	207148	228739	237995	230050	216766	222151	228388	1.02807	0.0399425	0.456895
CHEK2	78876.7	80676.9	73647.8	58689.9	67714.8	62744.5	64669.6	77927.4	72972.8	68264.1	0.935473	-0.0962325	0.468163
CHERP	244366	288698	286969	252518	280340	282682	294840	286924	268138	286197	1.06735	0.0940308	0.215491
CHFR	20545.4	30601.8	22892.5	20915.3	23904.1	25111.8	22700.6	21442.6	23738.7	23289.8	0.981087	-0.0275477	0.865564
CHI3L1	14430.3	82969.5	35516.3	24589.1	20479.4	23347.8	34180.8	50289.9	39376.3	32074.5	0.814563	-0.295902	0.681835
CHID1	284480	266758	311491	205936	282842	296235	302915	289365	267166	292840	1.0961	0.132373	0.336947
CHKA	61416.6	65024.4	69015	60706	61158.1	63654.7	63347.8	60537.6	64040.5	62174.5	0.970863	-0.0426607	0.416912
CHM	349599	301419	366407	253522	368748	384596	349059	394459	317737	374215	1.17775	0.236037	0.109486
CHML	18396.4	25521.2	20214.8	19279.3	19989.3	27748.4	22516.2	24497.6	20853	23687.9	1.13595	0.183896	0.261925
CHMP1A	153886	296374	195198	141422	211610	204917	197130	188870	196720	200632	1.01988	0.0284044	0.918958
CHMP1B	161732	183955	187911	172161	202509	216145	215737	204627	176440	209754	1.18882	0.249527	0.00503219
CHMP2A	225319	300299	269906	238184	258389	280588	277349	252578	258427	267226	1.03405	0.0483028	0.653721
CHMP2B	59018.2	117825	83788.7	49997.3	81656.3	72529.6	91456	86262.6	77657.2	82976.1	1.06849	0.0955758	0.754507
CHMP3	349779	430369	360402	323409	305077	383665	389532	391649	365990	367481	1.00407	0.00586605	0.963122
CHMP4A	247821	253875	238191	245266	234174	228828	237409	245092	246288	236376	0.959752	-0.0592662	0.0797104
CHMP4B	970586	1.07447e+06	969057	1.00402e+06	953798	924154	911397	898355	1.00453e+06	921926	0.917766	-0.123802	0.0355748
CHMP4C	1	18236.2	1	6728.61	1	1	1	1	6241.71	1	0.000160213	-12.6077	0.242696
CHMP5	353700	384797	296365	363511	331881	220296	291154	378671	349593	305501	0.873875	-0.194501	0.306887
CHMP6	102088	115986	106951	63861.1	104439	100294	116010	99397.2	97221.6	105035	1.08037	0.111524	0.556886
CHMP7	78266.2	94175.3	78122.2	75919.9	87340.4	96676	90047.3	80810	81620.9	88718.4	1.08696	0.120295	0.235438
CHORDC1	462358	481127	390609	420020	362095	374344	373314	463002	438529	393189	0.896609	-0.157449	0.196118
CHPF	54887.3	82238.2	62774.2	51454.4	58389.4	64907.6	62332.1	56342.9	62838.5	60493	0.962673	-0.0548816	0.761753
CHPF2	24656.3	27863.8	23793.1	20826.6	21155.4	26318.2	23577.8	21781.6	24284.9	23208.2	0.955664	-0.0654244	0.58336
CHPT1	32821.3	66665.1	45865.8	39247.8	37792.4	28707.2	33044.4	41560.2	46150	35276.1	0.764378	-0.387641	0.240949
CHRAC1	182387	273275	211918	218176	232844	237927	228665	190172	221439	222402	1.00435	0.00625954	0.966664
CHST11	6522833	8.37733e+06	5063455	4.92349e+06	5.83558e+06	6.65141e+06	6.11433e+06	7.41398e+06	6.22178e+06	6503824	1.04533	0.0639612	0.763345
CHST12	83959.5	57263.7	64149.7	77232.6	66992.2	86164.5	74166.8	44546.4	70651.4	67967.5	0.962012	-0.055873	0.810437
CHST14	118007	105625	130705	108432	110943	121558	133577	118925	115692	121251	1.04804	0.0676976	0.479179
CHSY1	53497.6	54895.6	65966.3	49274.3	49330.7	59319.3	54671.2	50955.6	55908.4	53569.2	0.958159	-0.0616626	0.600946
CHTF18	237046	214710	234493	222997	233733	236713	240204	237147	227312	236949	1.0424	0.0599063	0.15939
CHTF8	21933.9	34662	37251.1	23343	19568.4	31445.3	26128.5	32065.8	29297.5	27302	0.931888	-0.101771	0.696412
CHTOP	115689	1437903	196020	117100	148292	177860	162710	177303	466678	166541	0.356865	-1.48655	0.422992
CHUK	857952	990740	806579	792245	790823	828896	863383	843475	861879	831644	0.96492	-0.0515186	0.563719
CHURC1	181291	215398	78015.6	232213	48552.8	45649.5	68242.3	212950	176730	93848.6	0.531029	-0.913137	0.169111
CIAO1	485966	419624	411330	399094	387976	309749	366714	512060	429004	394125	0.918698	-0.122338	0.496257
CIAO2A	129570	131011	171204	94250.1	152141	161904	163573	158970	131509	159147	1.21016	0.2752	0.17661
CIAO2B	18992.6	13824.4	44713.1	27862.6	41372.5	39191.3	38637.8	1	26348.2	29800.7	1.13103	0.177641	0.785152
CIAO3	19587.6	23218.5	18928	25456.8	21841	17803	18750.9	18540.9	21797.7	19234	0.882384	-0.180522	0.211905
CIAPIN1	313232	332134	316313	348869	317942	309249	293184	324453	327637	311207	0.949853	-0.0742242	0.174943
CIP2A	123837	140866	125498	123336	122674	132869	132010	130720	128384	129568	1.00922	0.0132418	0.815432
CIR1	28928.2	33691.5	29396.1	40745.8	30550.2	31692.5	24816.3	32577.8	33190.4	29909.2	0.901139	-0.150179	0.357826
CIRBP	804046	640913	864992	633428	927022	913643	891730	745170	735845	869391	1.18149	0.240604	0.117531
CISD1	57514.8	52132.2	53353.9	50460.6	45994.1	45715.2	41714.8	51403.2	53365.4	46206.8	0.865857	-0.207799	0.0307993
CISD2	329095	330700	329871	268319	353466	364476	350296	318371	314496	346652	1.10225	0.140447	0.13797
CIT	106605	113365	113946	92491.8	103757	111072	110219	103777	106602	107206	1.00567	0.00815551	0.915955
CIZ1	59466.9	98997.1	63980.9	63427.9	69494.9	70403.9	72019.1	69516.4	71468.2	70358.6	0.984474	-0.0225749	0.912043
CKAP2	292950	295130	277736	267896	317993	279057	304404	300103	283428	300389	1.05984	0.083851	0.154316
CKAP2L	49746.3	55947.1	47112	48070.2	48370.4	41831.9	49770.1	44166.3	50218.9	46034.7	0.91668	-0.125509	0.173283
CKAP4	1.32631e+06	1550375	611870	1.34045e+06	1.54666e+06	1629669	1.64371e+06	1.52865e+06	1.20725e+06	1.58717e+06	1.3147	0.394733	0.160252
CKAP5	356822	391049	363323	340917	369292	379852	370494	371307	363028	372737	1.02674	0.0380767	0.4265
CKB	595573	798837	748259	575148	722732	751496	697162	689604	679454	715249	1.05268	0.0740684	0.571159
CKMT1B	1	1	1	1	24731.1	378812	1	30752.3	1	108574	108574	16.7283	0.315581
CKS1B	117650	1	224568	75595.7	195374	186786	193173	137553	104454	178222	1.70623	0.770813	0.214913
CLASP1	178433	199634	191480	172778	188904	189607	189404	186291	185581	188552	1.016	0.0229061	0.661428
CLASP2	362648	377876	391299	332119	386932	403591	394322	356557	365985	385351	1.05291	0.0743853	0.281519
CLASRP	29266.6	22238.6	32876	23104.3	32736.9	32765.8	32423.1	29286.4	26871.4	31803.1	1.18353	0.243096	0.145966
CLCC1	135019	150347	147516	136887	148160	149344	134994	130947	142442	140861	0.988902	-0.0160998	0.801365
CLCN3	25163	86206	49656.3	33987.8	32333.8	34981.4	34894.4	31997.9	48753.3	33551.9	0.688198	-0.539104	0.341464
CLCN5	21033.6	1	18779.1	20044	25800.9	20577.4	15496.1	23433.5	14964.5	21327	1.42518	0.511141	0.308116
CLCN7	166786	167100	160034	140173	164463	171816	170711	165586	158524	168144	1.06069	0.0849996	0.227829
CLDND1	22674.6	1	9258.86	15885.2	19993.4	30732.7	25286.2	20490.3	11954.9	24125.7	2.01806	1.01297	0.0816086
CLEC11A	92047.2	115425	151176	97393.3	126077	111523	106462	90593.3	114011	108664	0.953105	-0.0692925	0.740937
CLEC16A	105928	98697.4	143862	104696	100626	141209	131040	126056	113296	124733	1.10095	0.138744	0.428634
CLEC2B	200357	1	126123	150702	90143.7	133789	142367	119104	119296	121351	1.01723	0.0246425	0.965467
CLEC5A	62137.9	72105.1	67501	37209.7	1	1	37967.6	66736.8	59738.4	26176.6	0.438187	-1.19038	0.130228
CLIC1	11861055	12528272	10986685	13578951	13030662	11550856	11646519	12066953	1.22387e+07	1.20737e+07	0.986519	-0.0195816	0.807722
CLIC2	1	1	2126.42	2835.12	4900.66	5470.47	4822.42	2369.81	1240.88	4390.84	3.53848	1.82313	0.0202269
CLIC4	65282.6	80928.9	70794.5	69331.8	72768	64704.2	72197	75200.1	71584.5	71217.3	0.994871	-0.00741826	0.930669
CLIC6	44471.6	66560.2	23741.9	57133.7	36639.8	37370.2	46923.8	68148.5	47976.9	47270.6	0.985279	-0.0213959	0.954381
CLINT1	306800	322960	351055	262620	372503	356396	353044	304784	310859	346682	1.11524	0.157354	0.181871
CLIP1	43334	68472.4	46508.4	45642.3	52040.1	44797.7	50269.2	40446	50989.3	46888.3	0.919571	-0.120966	0.557196
CLIP2	73531.7	113567	86590.8	75080	92137.8	95998.6	88763.2	81213.8	87192.5	89528.4	1.02679	0.038141	0.823923
CLK1	83857.4	1	55143.8	74304.2	98452	81022.6	91093.3	66686.6	53326.6	84313.6	1.58108	0.660911	0.199546
CLK2	53465.4	59717	62648.1	50212.9	54811.7	55946.9	59580.9	54365.2	56510.9	56176.2	0.994078	-0.00856956	0.918633
CLK3	29630.2	30364	38359.9	20277.7	28661.5	30759.4	31890.9	31436.9	29657.9	30687.2	1.0347	0.0492172	0.801292
CLN3	27038.8	31717.3	29336.8	29677.4	29264.2	27971.3	21506.6	29220.8	29442.6	26990.7	0.916724	-0.125441	0.298203
CLN5	36989.5	1	40926.6	34769.7	57946.9	54993	58595.9	21678.3	28171.7	48303.5	1.71461	0.777881	0.172827
CLN6	62410.5	46728.8	64653.9	52331	57705.2	54126.2	60762	52533.4	56531.1	56281.7	0.995589	-0.006378	0.959397
CLN8	12109.4	1	1	1	12435.6	4440.41	1	7995.31	3028.1	6218.08	2.05346	1.03806	0.457859
CLNS1A	1.15599e+06	1.62628e+06	1.43473e+06	1.08869e+06	1.39712e+06	1.31975e+06	1.49605e+06	1.43843e+06	1.32642e+06	1.41284e+06	1.06515	0.0910541	0.548009
CLP1	264428	261964	259717	232951	249747	257882	267344	269211	254765	261046	1.02465	0.0351374	0.498507
CLPB	544581	546619	591360	490432	514792	542307	552329	539310	543248	537184	0.988839	-0.016193	0.798115
CLPP	174896	181975	180841	146656	216368	230358	240795	191441	171092	219740	1.28434	0.361027	0.0126114
CLPTM1	211791	230100	212556	176464	200011	205444	199464	200102	207728	201255	0.968842	-0.0456671	0.606805
CLPTM1L	429152	414397	481735	305204	384248	448490	433174	445169	407622	427770	1.04943	0.0696046	0.640865
CLPX	1.16572e+06	1.25671e+06	1.30584e+06	1.11564e+06	1361678	1.41095e+06	1.43783e+06	1.21153e+06	1.21098e+06	1.3555e+06	1.11934	0.162649	0.0734303
CLSPN	13554.8	9549.1	15725.5	12895.9	14537.1	14709.3	16059.2	15309.4	12931.3	15153.7	1.17186	0.228804	0.180408
CLTA	90981.1	101417	149184	64188.6	135833	127929	121986	118224	101443	125993	1.24201	0.312679	0.261881
CLTC	4.55522e+06	3.88516e+06	4.73473e+06	4.11749e+06	4.78324e+06	4.74079e+06	4818411	4756572	4.32315e+06	4.77475e+06	1.10446	0.143343	0.10325
CLTCL1	1254915	1.40045e+06	1.24931e+06	1.29269e+06	1.25607e+06	1.14092e+06	1.28524e+06	1.376e+06	1.29934e+06	1264556	0.973229	-0.0391493	0.584109
CLUH	899409	920595	932885	844955	875943	905365	895566	892237	899461	892278	0.992014	-0.0115678	0.744192
CLYBL	3438.88	1	3572.08	3039.53	4054.01	5287.75	9621.25	1	2512.87	4741	1.88669	0.915854	0.3584
CMAS	414781	418728	438916	357276	388707	398011	415422	449577	407425	412929	1.01351	0.0193585	0.811967
CMBL	16633.8	23368.2	23821.5	17337.3	15813.8	19487.8	22844.3	15966.4	20290.2	18528.1	0.913153	-0.131072	0.514491
CMC1	431376	422452	441672	334165	477506	415850	454590	438975	407416	446730	1.0965	0.132901	0.223953
CMC2	60188.8	132613	27080.1	40328.5	24392.1	35625.4	65963	47346.8	65052.7	43331.8	0.666104	-0.586182	0.438335
CMIP	114900	106226	112224	96270.4	115413	108981	120984	122711	107405	117022	1.08954	0.123718	0.115717
CMPK1	704028	862524	838728	691363	786431	797416	809071	747890	774161	785202	1.01426	0.020431	0.825166
CMPK2	53178.4	63398.2	46054	40260.9	41382.5	47954.2	46843.5	59997.9	50722.9	49044.5	0.966911	-0.0485444	0.800616
CMSS1	145816	123687	147039	144085	142188	136995	144630	143213	140157	141757	1.01141	0.0163725	0.796975
CMTR1	71664.5	75714.2	85683.5	61265.7	76863.8	73527.5	76162.6	76742.3	73582	75824.1	1.03047	0.0433032	0.689402
CMTR2	25911.7	1	20191.1	15919.8	23166.3	22706.4	22355.4	25117.4	15505.9	23336.4	1.505	0.589763	0.253933
CNBP	116647	101675	7924.18	97369.6	6800.78	1	11927.9	128557	80903.9	36821.6	0.455128	-1.13566	0.307503
CNDP2	1.25896e+06	1.39305e+06	1.44869e+06	1146446	1.38682e+06	1.53014e+06	1.35498e+06	1.36069e+06	1.31179e+06	1.40816e+06	1.07346	0.102275	0.28029
CNIH4	252501	1	287586	549487	296843	246518	243762	261561	272394	262171	0.962472	-0.055184	0.933533
CNN2	1.08568e+06	2.13952e+06	1.46879e+06	983912	1.32065e+06	1.21799e+06	1.34984e+06	1497360	1419477	1.34646e+06	0.948562	-0.0761862	0.801505
CNN3	139746	181230	41368.5	110167	152447	49280.8	96743.9	51988.1	118128	87615	0.741695	-0.431101	0.454976
CNNM3	32575.6	41117.7	41969.4	36041.3	41937.1	41675.1	41850.6	38447.1	37926	40977.5	1.08046	0.111643	0.26937
CNNM4	9309.52	13922.1	11965.7	7165.92	13614.3	11675.4	10543.8	8769.03	10590.8	11150.6	1.05286	0.0743158	0.767235
CNOT1	708765	652509	713466	604278	684054	714186	721778	681307	669755	700331	1.04565	0.0644054	0.334599
CNOT10	119838	115027	111664	112952	113967	119796	120499	118080	114870	118086	1.02799	0.0398276	0.216307
CNOT11	79954.5	95208.5	97107.6	71064.8	83439.2	96695.3	88104.1	80799.1	85833.9	87259.4	1.01661	0.0237639	0.850324
CNOT2	190438	194558	199245	122869	185872	208711	191832	188407	176777	193706	1.09576	0.131931	0.425283
CNOT3	183938	217512	216164	139302	207473	215185	203547	183884	189229	202522	1.07025	0.0979457	0.53562
CNOT4	38281.3	39373.9	34983.2	38644.4	34773.8	38800.6	37039.4	41401	37820.7	38003.7	1.00484	0.00696434	0.918442
CNOT6L	76754.4	94831.9	76041.1	63638.2	71635.1	75243.9	66405.4	73737.2	77816.4	71755.4	0.922111	-0.116987	0.423336
CNOT7	115428	111630	120235	94257.9	119316	120923	116615	114947	110388	117950	1.06851	0.0955962	0.275926
CNOT8	48971.5	46600	62070	44134.3	51141.1	56953.8	53765.9	51397.2	50443.9	53314.5	1.05691	0.0798465	0.536855
CNOT9	203776	242203	213502	187209	202329	201167	209664	212896	211672	206514	0.975632	-0.0355908	0.69049
CNP	424079	412288	471952	376811	427447	457620	471112	438260	421282	448610	1.06487	0.0906728	0.275214
CNPY2	109069	75897.6	130826	76694.3	150321	129822	116723	115114	98121.8	127995	1.30445	0.383442	0.114979
CNPY3	527951	557365	510092	593900	512832	434518	528986	546724	547327	505765	0.924063	-0.113936	0.229645
CNPY4	10016.8	1	8823.51	13474.7	10855.9	15850.1	17611.7	7570.38	8079.02	12972	1.60564	0.683151	0.233661
CNRIP1	5852.83	1	1	1	179787	1	864472	1	1463.96	261065	178.328	7.47839	0.295844
CNST	7802.32	1	13053.1	9896.19	12882.1	9061.85	13673.6	10393.4	7688.16	11502.7	1.49616	0.581264	0.271816
CNTNAP4	322231	353038	428581	426210	309737	362472	373894	555284	382515	400347	1.04662	0.0657345	0.779032
COA1	30525.2	36175.6	40501.6	29002.7	33379.4	40359.8	40301.5	32931.6	34051.3	36743.1	1.07905	0.109762	0.45552
COA3	144707	169970	221022	135904	170526	197450	201460	192273	167901	190427	1.13417	0.181631	0.333468
COA6	49905.5	101530	64989.8	81392.8	59433.4	64012.5	42706.7	49028.1	74454.6	53795.2	0.722523	-0.468885	0.16092
COA7	136213	152330	125054	138340	105936	96863.5	99038.2	142632	137985	111117	0.805288	-0.312423	0.0819115
COASY	1392885	1.47682e+06	1.42235e+06	1.29403e+06	1.34191e+06	1.52196e+06	1443991	1.32643e+06	1.39652e+06	1.40857e+06	1.00863	0.0123942	0.847216
COG1	77000.4	78982.4	88331.3	69227.9	85890.1	88764.4	85487.7	77385.7	78385.5	84382	1.0765	0.106348	0.251203
COG2	194441	258317	215074	185717	207507	228799	211462	199850	213387	211905	0.993053	-0.0100578	0.936035
COG3	157825	169037	159707	134446	174244	180524	175358	168674	155254	174700	1.12525	0.170252	0.0720717
COG4	85754.4	97166.4	95080.6	83642.7	97579.9	98583.5	92999.5	96197	90411	96339.9	1.06558	0.0916352	0.176037
COG5	72096.4	72678.9	82017	69014.9	81708.3	82398.9	76825.9	75355.8	73951.8	79072.2	1.06924	0.0965858	0.182017
COG6	71977.8	61134.9	72868.8	64720.2	72772.8	85645.6	78256.9	69170.9	67675.5	76461.6	1.12983	0.176102	0.105807
COG7	43414.4	51497.5	51406.1	41312.5	49165	58653.5	45150.6	51353.6	46907.6	51080.7	1.08896	0.122956	0.32414
COG8	92342.1	92541.1	97133.5	86009.6	91849.4	99961.6	95550.1	88833.8	92006.6	94048.7	1.0222	0.0316718	0.560589
COIL	76405.9	86882.5	77091.9	76229.6	75190	67290.8	73848.4	71483.2	79152.5	71953.1	0.909044	-0.137578	0.0660993
COLGALT1	1.6291e+06	1.65293e+06	1.8184e+06	1.35407e+06	1.64401e+06	1.74734e+06	1.76421e+06	1.70714e+06	1.61362e+06	1.71568e+06	1.06324	0.0884731	0.372834
COMMD1	40796.8	46647.2	45289.5	41738.2	53194.9	50331	49879.1	50096.4	43617.9	50875.3	1.16639	0.222045	0.00720946
COMMD10	45338.8	140870	74194.9	47464	68664.9	85150.9	71326.2	57658	76967	70700	0.918576	-0.122529	0.801013
COMMD2	82777.7	88570.3	104888	76165.8	85923	102590	104447	84278.3	88100.4	94309.5	1.07048	0.0982536	0.475035
COMMD3	12232.3	21596	13870.4	14955.6	14831.1	13126	15479.2	17187	15663.6	15155.8	0.967583	-0.0475423	0.830372
COMMD4	140429	155981	125401	134856	124915	135225	131772	130557	139166	130617	0.938569	-0.0914655	0.280133
COMMD5	55020.5	95636.9	63707.8	90646.8	61012.9	62245.6	72436.5	69756	76253	66362.7	0.870297	-0.200421	0.400938
COMMD7	48264.3	62979.8	47744.1	52194.7	51912.3	47667.6	51524	50634.6	52795.7	50434.6	0.955279	-0.0660055	0.559853
COMMD9	6290.04	6540.04	10533.1	8511.64	12832.9	10631.7	9986.3	10377.2	7968.71	10957	1.37501	0.459441	0.0507563
COMT	429704	474069	479997	481745	433556	398525	470035	498779	466379	450224	0.965361	-0.0508602	0.548779
COMTD1	50169.5	52690.8	56616.9	50003.4	49052.1	53149.9	54175.4	65265.7	52370.2	55410.8	1.05806	0.0814219	0.466364
COP1	14128	10220.2	23067.9	16761.6	15421.8	15244.3	14123	12111.4	16044.4	14225.1	0.88661	-0.173628	0.556901
COPA	3.37149e+06	3.18522e+06	3.24423e+06	2.9947e+06	3130027	3.05002e+06	3.13365e+06	3.30554e+06	3.19891e+06	3.15481e+06	0.986213	-0.0200286	0.66115
COPB1	1.92898e+06	1.90219e+06	2.02161e+06	1.70282e+06	1911793	1.92723e+06	2.00154e+06	2.02174e+06	1.8889e+06	1.96558e+06	1.04059	0.0574042	0.349718
COPB2	2955748	2.62468e+06	3.07022e+06	2.59422e+06	2.82869e+06	2.95663e+06	2.95991e+06	2.98218e+06	2.81122e+06	2.93185e+06	1.04291	0.0606167	0.392693
COPE	885590	865893	1.04906e+06	779002	932163	943868	1.01434e+06	935914	894886	956572	1.06893	0.0961703	0.363585
COPG1	1.69234e+06	1.65256e+06	1.74503e+06	1567746	1.70738e+06	1.6547e+06	1.73933e+06	1.70678e+06	1.66442e+06	1.70205e+06	1.02261	0.0322503	0.410674
COPG2	529649	601052	563780	485116	508729	544821	527270	528382	544899	527300	0.967703	-0.0473645	0.536807
COPS2	181675	197068	189271	159429	186405	195688	186400	182484	181861	187744	1.03235	0.0459343	0.533434
COPS3	975041	886873	993771	812729	901109	908072	921743	892438	917103	905841	0.987719	-0.017827	0.806754
COPS4	575763	691657	625976	578312	577926	640428	577429	578355	617927	593535	0.960526	-0.0581041	0.47294
COPS5	304299	270003	334839	224656	324637	334205	326878	336703	283449	330606	1.16637	0.222022	0.13953
COPS6	683199	643369	691849	588040	625223	659929	658890	677281	651614	655331	1.0057	0.00820466	0.893153
COPS7A	81423.3	92009.3	84256.9	78429.9	82560.2	84880.3	93313.2	83459.6	84029.8	86053.3	1.02408	0.0343293	0.615616
COPS7B	339546	406552	371473	343825	357180	355577	337852	358776	365349	352346	0.964411	-0.0522807	0.471938
COPS8	210542	212647	272917	239703	268540	240520	255834	198350	233952	240811	1.02932	0.0416867	0.75638
COPZ1	1.42466e+06	2.23971e+06	1.67702e+06	1.49377e+06	1.71559e+06	1.79042e+06	1.63839e+06	1.44742e+06	1.70879e+06	1.64795e+06	0.964398	-0.0522989	0.77529
COPZ2	19830.2	11270.9	22471.3	18370.8	15938	17567.1	16369	15465.1	17985.8	16334.8	0.908206	-0.138909	0.543518
COQ10B	17510.7	1	17088.3	10735.1	17767.9	1	27368.7	11844.9	11333.8	14245.6	1.25692	0.329888	0.694673
COQ3	43453	47225.8	31646.6	45067.6	40735.5	33769.3	35390.1	40893.6	41848.2	37697.1	0.900805	-0.150713	0.344747
COQ5	140767	134278	136950	116349	137067	140519	130962	133198	132086	135436	1.02537	0.036139	0.595822
COQ6	602262	893028	807853	671179	654727	722408	742638	716769	743580	709136	0.953677	-0.0684273	0.644172
COQ7	99624.6	74177	78178.9	81249.7	102509	109316	131940	53873.7	83307.5	99409.7	1.19329	0.254939	0.410354
COQ8A	132691	105259	157888	116733	139490	150040	146330	143167	128143	144757	1.12965	0.17588	0.241829
COQ8B	11768.3	19930.2	20365.1	12611.5	18416.5	18851.2	18939.8	19462.1	16168.7	18917.4	1.17	0.226505	0.319292
COQ9	18018.1	29544.3	22503.8	22144.8	24856.6	24762.9	21028.9	22014.8	23052.8	23165.8	1.0049	0.00705784	0.967176
CORO1A	8883790	9574745	8858378	9082084	9692366	9475736	9413996	8848441	9.09975e+06	9.35763e+06	1.02834	0.0403171	0.332992
CORO1B	1.05365e+06	1.09051e+06	1.15007e+06	889526	1.15569e+06	1157291	1.18559e+06	1.14233e+06	1.04594e+06	1.16023e+06	1.10927	0.149608	0.131801
CORO1C	1.60117e+06	1.54447e+06	1.58401e+06	1.48498e+06	1.54355e+06	1.49228e+06	1.60246e+06	1.64103e+06	1.55366e+06	1.56983e+06	1.01041	0.014941	0.711897
CORO2A	81454.4	76099.2	121611	71774.2	88562	87084	90420.1	85120.8	87734.6	87796.7	1.00071	0.00102067	0.996032
CORO7	765659	735106	788819	700457	774498	766499	795204	804542	747510	785186	1.0504	0.0709407	0.144906
COTL1	3761811	4075922	4.22066e+06	3679018	4.04208e+06	4.34644e+06	4269617	4092577	3.93435e+06	4.18768e+06	1.06439	0.0900251	0.148777
COX11	43902.3	48473.3	54180.7	45599.4	40969	49097.3	47308.7	46325.9	48038.9	45925.2	0.956	-0.0649173	0.488395
COX15	132064	123810	134728	98828	129927	139156	127823	130883	122358	131947	1.07837	0.108857	0.332112
COX16	18730.7	1	32669.4	24321.3	58746.2	65978.3	57253.8	31995.1	18930.6	53493.4	2.82576	1.49864	0.0144983
COX17	22734.2	1	4145.92	27330.5	1	15933.7	18350.4	16026.1	13552.9	12577.8	0.928052	-0.107722	0.907271
COX18	53794.3	62314.7	42971.7	51629.5	64653.5	63309.8	63683.9	54711.7	52677.5	61589.7	1.16918	0.225502	0.112331
COX19	1	1	86419.8	55487.4	1	74106.6	1	56540.6	35477.3	32662.3	0.920653	-0.119271	0.925284
COX20	102352	110996	119785	107238	107072	102567	112792	96070.9	110093	104626	0.950341	-0.0734832	0.325585
COX4I1	2.16001e+06	2.70688e+06	2.57119e+06	2.02302e+06	2.63805e+06	2388883	2.40072e+06	2.15925e+06	2.36528e+06	2396726	1.0133	0.0190562	0.875108
COX5A	42317.7	1	56450.2	37640.8	45221.4	40937.2	41018.3	55362.4	34102.4	45634.8	1.33817	0.420261	0.416356
COX5B	207218	283797	108939	297966	102180	115411	129384	270980	224480	154489	0.688207	-0.539085	0.276892
COX6A1	80321.6	22605.2	114566	87489.6	109609	140604	132443	155010	76245.7	134417	1.76294	0.817984	0.0492913
COX6B1	132264	1	51719.6	113260	99061.6	95508.6	78087.9	92702	74311.1	91340	1.22916	0.29767	0.613965
COX6C	883914	815193	1.3012e+06	662633	1.0821e+06	1.14931e+06	1.15734e+06	1.04484e+06	915736	1.1084e+06	1.21039	0.275473	0.254144
COX7A2	1.62282e+06	1.81105e+06	1.69726e+06	1.79032e+06	1914522	1962869	1.82636e+06	1.61108e+06	1.73036e+06	1.82871e+06	1.05684	0.0797502	0.323388
COX7A2L	128791	125481	161324	95466.5	156748	158210	160266	148447	127766	155918	1.22034	0.287284	0.126073
COX7B	77744.6	72867.8	85571.8	58501.6	79021.5	75429.3	72947	96436.1	73671.4	80958.5	1.09891	0.136077	0.385479
CPD	614952	749116	738285	591289	724273	748570	743231	695656	673410	727932	1.08096	0.112318	0.279032
CPEB4	5040.76	1	5052.32	4760.77	5077.13	7514.36	6668.54	5313.48	3713.71	6143.38	1.65424	0.726169	0.146038
CPM	31311.1	71858	57494.6	20902	67524.7	70871.2	78033.5	59051.4	45391.4	68870.2	1.51725	0.60146	0.136513
CPNE1	439785	394280	438166	406073	441820	454496	451727	431274	419576	444829	1.06019	0.084319	0.11228
CPNE2	393339	395108	377496	374175	417002	366353	405407	383474	385029	393059	1.02085	0.0297772	0.553487
CPNE3	190276	180003	171795	176098	192778	165365	181118	183061	179543	180581	1.00578	0.00831205	0.886261
CPNE7	8187.42	1	2671.05	11444.8	8176.14	42338.3	11238.9	9798.24	5576.07	17887.9	3.20797	1.68166	0.231999
CPNE8	362453	287914	384760	324679	386093	412502	394065	374224	339952	391721	1.15228	0.204496	0.0883961
CPOX	779650	664941	781347	689299	668963	683677	694328	833488	728809	720114	0.988069	-0.0173157	0.864437
CPPED1	401010	347349	406907	383214	393182	410235	416588	435195	384620	413800	1.07587	0.1055	0.125618
CPQ	34022.8	36822.3	42599.6	29395.9	39623.9	37863.5	39201.4	36638.9	35710.1	38331.9	1.07342	0.102212	0.417622
CPS1	6081.66	1	9268.57	5814.6	6671.57	8579.33	8682.03	6069	5291.46	7500.48	1.41747	0.503319	0.344582
CPSF1	685387	692502	741616	634961	683876	712787	713241	689521	688616	699856	1.01632	0.0233581	0.65419
CPSF2	1.02482e+06	1.12656e+06	1.06056e+06	980996	1.0225e+06	1.11544e+06	1.08709e+06	1.05256e+06	1.04823e+06	1.0694e+06	1.02019	0.0288412	0.58945
CPSF3	569748	551237	617094	522548	568178	592675	569288	600468	565157	582652	1.03096	0.0439834	0.461028
CPSF4	115669	106598	89034.8	84043.4	70984	73284.3	86301.9	120466	98836.2	87759.1	0.887925	-0.17149	0.451559
CPSF6	1.05955e+06	979316	1088352	1.00671e+06	1.0312e+06	961626	1.05945e+06	1101761	1.03348e+06	1.03851e+06	1.00487	0.00700226	0.900362
CPSF7	1.21188e+06	1.08108e+06	1.33622e+06	1.10055e+06	1.26505e+06	1.31341e+06	1.29983e+06	1281177	1.18243e+06	1.28987e+06	1.09086	0.125464	0.164388
CPT1A	1.09675e+06	1010472	1.06481e+06	860173	1104211	1.05763e+06	1.12528e+06	1135344	1.00805e+06	1.10562e+06	1.09679	0.133283	0.158745
CPT2	421753	375398	443505	366121	426659	448708	445640	441923	401694	440733	1.09718	0.133805	0.122833
CPTP	9927.2	1	9925.6	8682.41	13162.3	5658.76	14745.7	10840.1	7134.05	11101.7	1.55616	0.637991	0.250803
CPVL	234527	194581	219996	209829	203911	230538	228212	213448	214733	219027	1.02	0.0285666	0.698176
CR1	23693.2	17755.5	20575.5	20635.9	18180.7	19640.1	31646.1	21847.9	20665	22828.7	1.1047	0.143656	0.544638
CRABP1	118021	105519	121450	179307	159271	187257	163820	176203	131074	171638	1.30947	0.388982	0.0848978
CRACR2A	34377	33746.9	42498	32442.7	41561.7	41550	41111.1	37724.7	35766.2	40486.9	1.13199	0.178859	0.128156
CRADD	63211.2	55047.4	75384.5	49402.8	70414.1	75692.6	79135.6	77747.1	60761.5	75747.4	1.24663	0.318039	0.0709364
CRAT	43827.8	53838.2	55452.1	46446.9	51215.3	54775.4	55148	51869.1	49891.3	53251.9	1.06736	0.0940468	0.327543
CRBN	54663.6	52561.3	45581.2	42564.1	42349.7	48227	42226.9	57030.3	48842.6	47458.5	0.971662	-0.0414736	0.769395
CREB1	441826	763396	504249	524151	563227	511260	533563	450457	558405	514627	0.9216	-0.117787	0.590842
CREBBP	18088.3	16274.8	15461	14096.6	15376.3	18271.2	17435.4	17944.9	15980.2	17257	1.0799	0.110895	0.275291
CREG1	242084	17159.1	452195	242141	422867	425739	468099	278356	238395	398765	1.67271	0.742185	0.173008
CRELD2	24282.1	13519.5	9277.38	28944.4	4633.22	8102.57	5861.62	11550.6	19005.8	7537.01	0.396563	-1.33438	0.0822799
CRIP1	450835	485468	124928	338616	118445	73151.1	72742.9	176924	349962	110316	0.315223	-1.66556	0.0548966
CRIPT	71962.2	93257.5	60430.7	75023.9	43943.9	53306.5	32732.9	116712	75168.6	61673.7	0.820472	-0.285474	0.539181
CRK	165292	192255	177746	156585	189971	202457	184537	174429	172970	187849	1.08602	0.119053	0.179999
CRKL	303371	289677	333875	259331	357946	359019	346727	312742	296564	344108	1.16032	0.214521	0.0500014
CRLF3	33011.1	36721.7	35747.7	28625.4	33665.8	35216.4	33487.5	31476.5	33526.5	33461.6	0.998063	-0.00279721	0.975246
CRNKL1	126458	140363	149186	117643	119467	137490	135633	127342	133412	129983	0.974293	-0.0375727	0.69239
CRPPA	1299.34	1	8224.95	4452.08	3472.23	2719.15	6966.45	12292.7	3494.34	6362.64	1.82084	0.864604	0.354184
CRTAP	73914.4	98215.2	100093	71093	90718.5	89175.1	95670.2	89519.8	85829	91270.9	1.0634	0.0886892	0.535715
CRTC1	31313.3	1	41657.9	13549.9	29895.3	30725.2	36504.8	30928.1	21630.5	32013.4	1.48001	0.565606	0.345332
CRTC2	8845.26	10489.4	11532.7	8056.29	10731.6	10237	9900.35	8850.07	9730.9	9929.75	1.02043	0.029184	0.831434
CRYBG1	68293.9	100993	83035.2	92907.9	89043.6	111994	99382.1	82072.3	86307.5	95622.9	1.10793	0.147871	0.369062
CRYL1	54397.7	47881.7	65163.2	55361.8	61487.2	39417.4	35000	43454	55701.1	44839.7	0.805005	-0.31293	0.172272
CRYZ	607330	514846	604773	550633	577309	620018	592502	604442	569396	598568	1.05123	0.072083	0.294387
CRYZL1	1.60989e+06	1.67591e+06	1.69581e+06	1.52104e+06	1.65655e+06	1.70823e+06	1.64619e+06	1.60992e+06	1.62566e+06	1.65522e+06	1.01818	0.0259965	0.537683
CS	4496825	4000600	4606811	3948876	4545239	4.40964e+06	4587546	4462789	4263278	4.5013e+06	1.05583	0.0783799	0.254196
CSDE1	1.88094e+06	1.68957e+06	1.81267e+06	1.74435e+06	1.72387e+06	1725332	1.76944e+06	1.73868e+06	1.78188e+06	1.73933e+06	0.976121	-0.0348677	0.386246
CSE1L	2.58406e+06	2.58112e+06	2160942	2.47954e+06	2551000	2.29507e+06	2342238	2.47624e+06	2.45141e+06	2.41614e+06	0.985609	-0.0209127	0.77361
CSGALNACT2	8262.87	1	14576.5	5332.67	4489.12	7166.6	9281.07	13529.9	7043.26	8616.66	1.22339	0.290886	0.679131
CSK	581086	511989	598647	539708	570577	600497	609533	597628	557858	594559	1.06579	0.0919223	0.160046
CSNK1A1	251946	239468	276036	198873	261599	272529	275997	271590	241581	270429	1.11941	0.162744	0.170998
CSNK1D	85194.4	83919	89559.6	74754.7	91533	92351.5	108047	97985.5	83356.9	97479.2	1.16942	0.225792	0.0295341
CSNK1E	46119.3	44524.6	47573.2	43448.9	44014.8	46267.4	49287.2	48459.7	45416.5	47007.3	1.03503	0.0496673	0.329288
CSNK1G1	15815.6	11738.2	26573.7	15341.2	26140.5	1	27466.5	16502.3	17367.2	17527.6	1.00924	0.0132644	0.982943
CSNK1G2	18907.5	1	17358.6	8579.92	17375.2	22621.6	23999.1	15216.9	11211.8	19803.2	1.76629	0.820719	0.146021
CSNK1G3	53934	49927.6	63760.4	46374.8	62183.8	64280.7	62981.3	58053.7	53499.2	61874.9	1.15656	0.209836	0.107986
CSNK2A1	386490	434160	430484	350739	403387	417745	400330	416042	400468	409376	1.02224	0.0317391	0.687749
CSNK2A2	300864	324614	359087	275415	321885	351045	341983	338769	314995	338420	1.07437	0.103489	0.286281
CSNK2B	605009	551234	548759	553649	573973	502587	539570	653998	564663	567532	1.00508	0.00731248	0.938586
CSRP1	1.534e+06	1742633	557423	1.56218e+06	557002	613077	420721	1.78562e+06	1.34906e+06	844106	0.6257	-0.676457	0.270152
CST3	33697.8	1	72871.4	38012.8	64399.4	74090	70008.9	46752.7	36145.7	63812.8	1.76543	0.820019	0.161116
CST5	5083.72	1	1	23888.5	1	1	1	21207.2	7243.56	5302.54	0.732036	-0.450014	0.811033
CST7	1	1	1	31341.4	50696.7	1	1	1	7836.11	12674.9	1.6175	0.693766	0.758518
CSTA	115228	49000.5	168182	155397	130480	101959	91305	88869.1	121952	103153	0.84585	-0.241526	0.547205
CSTB	502969	529816	643183	533019	686800	611811	639545	620378	552247	639634	1.15824	0.211933	0.060221
CSTF1	235604	209781	249362	208244	224803	235012	230849	230197	225748	230215	1.01979	0.0282715	0.691122
CSTF2	47731.8	56501.9	52668.2	57073.5	64513	56369.4	56679.3	49074.1	53493.9	56659	1.05917	0.0829307	0.442969
CSTF2T	170215	178927	186115	171239	207640	198112	181186	202537	176624	197369	1.11745	0.160211	0.0278679
CSTF3	500514	536065	518546	429445	497833	536095	525571	497652	496142	514288	1.03657	0.0518217	0.513554
CT45A10;CT45A8;CT45A9;CT45A2	1	30187.7	1	25430	1	66735.2	1	1574.47	13904.9	17077.9	1.22819	0.296536	0.870988
CTBP1	1.50163e+06	1554834	1.54327e+06	1.39673e+06	1.59737e+06	1658518	1.5846e+06	1.54592e+06	1.49912e+06	1.5966e+06	1.06503	0.0908904	0.0707451
CTBP2	106914	85489.6	111815	90905.6	99090	101710	111929	222775	98781.3	133876	1.35528	0.438588	0.325981
CTBS	40121.2	35751.7	57055.1	41040.8	52141.8	58371.5	57834.2	54375.9	43492.2	55680.9	1.28025	0.356425	0.0745051
CTCF	44370.9	56600.8	32446.8	45661.3	30331.4	37266.7	34109.8	47029.2	44770	37184.3	0.830563	-0.267839	0.264152
CTDP1	370699	315612	370838	340585	354467	365887	373844	361224	349434	363856	1.04127	0.0583479	0.366011
CTDSP1	41411.4	48597	45123.9	41736.1	43428.4	41678.3	48214.5	46235.1	44217.1	44889.1	1.0152	0.0217595	0.772942
CTDSPL2	120035	118261	100827	110989	107198	116608	103576	102053	112528	107359	0.954066	-0.0678393	0.382377
CTH	4411.74	1	18714.5	15112.3	11057.4	21491.3	21377.4	11788.4	9559.87	16428.6	1.7185	0.78115	0.247157
CTIF	16594.8	22435.7	19345.8	17355.9	15771	19990.3	15938.3	15419.4	18933.1	16779.7	0.886267	-0.174187	0.251381
CTNNA1	59672.6	72413.1	51681.3	57772.1	59185.7	65535.6	56914.5	61337.5	60384.8	60743.3	1.00594	0.00854145	0.943153
CTNNAL1	519916	588846	1.02496e+06	477047	614915	721216	708853	515375	652692	640090	0.980692	-0.0281285	0.930274
CTNNB1	21613.1	1	14558.5	22248	16098.9	20583.2	13003.5	29190.2	14605.1	19719	1.35014	0.433106	0.448844
CTNNBL1	443753	495779	475046	390062	431167	439878	456660	474860	451160	450641	0.99885	-0.00166053	0.984392
CTNND1	5229.61	6573.27	8910.12	1	5615.09	3815.43	3945.58	6985.05	5178.5	5090.28	0.982965	-0.0247883	0.967464
CTPS1	1045391	1.0631e+06	1.05459e+06	988819	967293	1.01799e+06	1.05323e+06	1.12353e+06	1.03798e+06	1.04051e+06	1.00244	0.00351972	0.948125
CTPS2	721434	732216	719787	657117	706460	721266	728387	717434	707638	718387	1.01519	0.0217483	0.580905
CTR9	152911	134764	158903	130718	151609	138158	157895	171287	144324	154738	1.07215	0.100512	0.324735
CTSA	266458	185742	298255	218954	238633	241054	269654	307044	242352	264096	1.08972	0.123958	0.494914
CTSB	893710	917464	753195	915989	781409	679047	763637	907534	870089	782907	0.8998	-0.152323	0.207085
CTSC	1.21153e+06	1.31144e+06	1226483	1.09648e+06	1185356	1.06067e+06	1.29675e+06	1.37393e+06	1.21148e+06	1.22918e+06	1.0146	0.0209156	0.836067
CTSD	12340388	14183405	13392307	12034555	12250219	12486299	13059644	11884722	1.29877e+07	12420221	0.956309	-0.0644511	0.356615
CTSG	159086	222897	156991	185271	110312	120658	138067	115102	181061	121035	0.668475	-0.581054	0.022908
CTSH	46877.2	61232.2	30846.1	48379.9	53446.8	57645.9	58899.6	44613.8	46833.8	53651.5	1.14557	0.196068	0.380356
CTSL	103809	1	98201.5	105479	86850.8	99152.9	87175.2	105068	76872.5	94561.8	1.23011	0.298789	0.543415
CTSO	1	1	1	1	5952.84	6229.89	6493.99	2774.77	1	5362.87	5362.87	12.3888	0.00859049
CTSS	509423	380448	541621	463131	539239	474860	570123	515385	473656	524902	1.10819	0.148209	0.262383
CTSZ	1.22491e+06	1.1987e+06	936724	1.12017e+06	860018	792448	861193	1.38169e+06	1.12012e+06	973838	0.869402	-0.201905	0.38568
CTTN	1	1	1	6621.69	1	4061.04	1	1	1656.17	1016.01	0.613469	-0.704939	0.755045
CTU1	141225	126531	119673	122952	126690	127789	122843	138227	127595	128887	1.01013	0.0145378	0.831428
CTU2	84505.9	73894.2	99448.4	81041.5	94914.2	90988.9	91674.1	93370.6	84722.5	92736.9	1.0946	0.130399	0.233615
CUEDC2	13054	1	1	8358.23	1	1	6830.34	4981.78	5353.56	2953.53	0.551695	-0.858058	0.545024
CUL1	168381	193891	162183	150913	160844	163513	155503	157072	168842	159233	0.943088	-0.0845354	0.371397
CUL2	181442	158127	191008	149593	171563	183335	185798	188281	170042	182244	1.07176	0.09998	0.307413
CUL3	494229	476293	476875	418993	468100	478165	462330	476256	466597	471212	1.00989	0.0141993	0.799993
CUL4A	189468	181762	189185	163592	190473	191771	190210	189778	181002	190558	1.0528	0.0742267	0.213529
CUL4B	280275	306468	285930	281224	285249	277843	281626	269814	288474	278633	0.965886	-0.050075	0.221158
CUL5	182580	194492	199688	159004	176701	204877	192163	188085	183941	190457	1.03542	0.050221	0.570582
CUL7	20457.8	15187.6	20993.1	15252.9	19657.2	20731.8	20433.8	21764	17972.8	20646.7	1.14877	0.200093	0.192036
CUSTOS	185250	198852	180699	202479	194224	179685	202731	188762	191820	191350	0.997551	-0.00353704	0.949647
CUTA	34247.2	1	1	27904.7	63954.9	23390.4	52865.7	91724.7	15538.5	57983.9	3.73163	1.89981	0.0516226
CUTC	51481	58771.5	41595.2	40236.2	42711.1	29539.1	45912.9	52281.6	48021	42611.2	0.887345	-0.172433	0.436402
CUX1	30644.9	40126.9	35972.4	26517.4	37547.7	37221.2	35643.5	30436.8	33315.4	35212.3	1.05694	0.0798916	0.603286
CUX2	140849	1	241494	145359	208493	178993	191518	218082	131926	199271	1.51048	0.59501	0.269575
CWC15	228142	219472	262675	168323	246119	245309	259578	229162	219653	245042	1.11559	0.157806	0.289216
CWC22	245839	242067	254088	220729	243942	250824	248102	231264	240681	243533	1.01185	0.0169962	0.745862
CWC25	132958	149731	148379	139888	134136	146000	141015	129283	142739	137608	0.964056	-0.0528109	0.37756
CWC27	354967	359662	370748	360721	346335	357385	343657	349582	361524	349240	0.96602	-0.0498749	0.0333978
CWF19L1	468270	407914	481633	433726	449267	446230	456879	477985	447886	457590	1.02167	0.0309255	0.621391
CWF19L2	24862.5	21035.6	28098.7	20397.7	24714	30687.6	27056.7	23677.8	23598.6	26534.1	1.12439	0.169144	0.263464
CXCR4	12465.2	16819.8	12947.5	15926.6	15956.9	19242.3	18696.5	17572.5	14539.8	17867.1	1.22884	0.297296	0.0484027
CXorf38	68264.8	81606	65115.9	75106.6	62354.2	69238.2	66095.7	72381.8	72523.3	67517.5	0.930976	-0.103184	0.294298
CXXC1	111707	116809	107693	112659	101354	101983	106723	118394	112217	107113	0.954517	-0.0671572	0.303448
CXXC5	1	1	1	1	24037.9	26435	30374.5	3838.35	1	21171.5	21171.5	14.3698	0.0374461
CYB561D2	297560	289415	325434	257502	290900	308137	292115	289783	292478	295234	1.00942	0.0135312	0.860813
CYB5B	75570.6	1	95363.3	69275.3	104532	91784.8	80338.4	85804	60052.6	90614.8	1.50892	0.593521	0.239146
CYB5R1	319552	305471	332393	270180	329724	336823	330486	313916	306899	327737	1.0679	0.0947768	0.222152
CYB5R2	308796	296169	263721	284390	297586	266342	260345	268825	288269	273275	0.947985	-0.0770637	0.282389
CYB5R3	1.62931e+06	1.28337e+06	1.43225e+06	1.30086e+06	1.52933e+06	1.44095e+06	1554950	1.57668e+06	1.41145e+06	1.52548e+06	1.08079	0.112088	0.255049
CYB5R4	209125	203552	235939	180267	233565	216628	233176	226493	207221	227465	1.0977	0.134479	0.175134
CYBA	887552	840088	1.02377e+06	795437	1072284	983566	978717	1.02785e+06	886712	1.01561e+06	1.14536	0.195801	0.0734687
CYBB	3.3696e+06	3.81342e+06	2.56459e+06	2.18817e+06	2.17749e+06	382544	362637	640254	2.98394e+06	890732	0.298508	-1.74416	0.0108979
CYBC1	80971.4	88986.5	84026	64133	91423.4	89107.2	86797.5	89089.3	79529.2	89104.3	1.1204	0.164011	0.173208
CYC1	1021762	893143	1.06362e+06	881764	1.08681e+06	1.0998e+06	1.06431e+06	1.07894e+06	965071	1082466	1.12164	0.165614	0.0807362
CYCS	2.25319e+06	2.29515e+06	2.72788e+06	2.11705e+06	2.51154e+06	2.69835e+06	2510972	2.46088e+06	2.34832e+06	2.54543e+06	1.08394	0.116284	0.239056
CYFIP1	342411	352034	342768	303307	336225	344268	336011	348356	335130	341215	1.01816	0.0259606	0.621729
CYFIP2	22861	27233.9	30385.8	14887.8	26282.8	25054.7	20131.3	21244.9	23842.1	23178.4	0.972162	-0.0407307	0.865051
CYLD	50295.2	51749.4	97047.7	48177.1	56279.6	60833.3	65685.9	50522.8	61817.3	58330.4	0.943593	-0.0837633	0.791384
CYP1B1	79767.2	96220	85028	74148.7	81163.9	91559.6	69653.1	81359.2	83791	80933.9	0.965903	-0.0500499	0.675268
CYP20A1	21358	25996.8	25277.4	19049.2	21854.6	22126.6	25966	23276.1	22920.4	23305.8	1.01682	0.0240606	0.847086
CYP24A1	69564.9	1	202590	126111	148578	87739.4	105482	191475	99566.7	133319	1.33899	0.421144	0.522549
CYP27A1	1.60117e+06	2.35054e+06	597070	1.25987e+06	1.84767e+06	426792	365556	554502	1.45216e+06	798630	0.549959	-0.862605	0.244829
CYP2S1	99444.4	85832.8	95214.2	83569.6	94196.4	103880	95852.9	96705.6	91015.3	97658.8	1.07299	0.101642	0.189314
CYP51A1	913962	801203	843133	798769	974191	937125	969670	924828	839267	951454	1.13367	0.181004	0.0176595
CYRIA	47138.3	58393.9	61404.6	51164.5	67012.5	66023.4	61588.2	61493.7	54525.3	64029.4	1.17431	0.231808	0.0545459
CYRIB	1.3431e+06	1.73298e+06	1.38486e+06	1.43263e+06	1.61274e+06	1.47641e+06	1.46908e+06	1.40789e+06	1.47339e+06	1.49153e+06	1.01231	0.017653	0.862067
CYTH1	35207.8	61287.5	38811.5	37635.1	40846.5	42286.5	39580.2	43525.1	43235.5	41559.6	0.961238	-0.0570346	0.801476
CYTH2	58960.8	96267	83745.5	61368.5	86848.9	89530	86398	83611.4	75085.4	86597	1.15331	0.205785	0.291515
CYTH3	20354.3	1	1	1	12958.2	16656.6	20262.5	16535.4	5089.31	16603.2	3.26236	1.70592	0.105136
CYTH4	126133	51584.7	121264	112292	144037	106033	132629	95509.4	102818	119552	1.16275	0.217543	0.45399
CZIB	168570	210576	153401	179924	165286	163192	136349	172227	178118	159263	0.894147	-0.161416	0.247019
D2HGDH	55916.9	65739.9	62514.3	56029.8	65064.8	66578.8	63736.6	63412.5	60050.2	64698.2	1.0774	0.107557	0.151971
DAAM1	7059.3	1	1	11321.6	1	14898.9	17987.1	7894.54	4595.73	10195.4	2.21844	1.14955	0.299652
DACH1	1.15903e+06	1475950	424080	1.22735e+06	1.05854e+06	425942	408175	325054	1.0716e+06	554427	0.517382	-0.950699	0.121015
DAD1	1.88438e+06	1.77179e+06	1.66902e+06	1.75871e+06	1.80705e+06	1.79424e+06	1.72828e+06	1.65728e+06	1.77097e+06	1.74671e+06	0.986301	-0.0199007	0.680903
DAG1	10904.8	7398.76	11145.6	10289.9	12744.2	12712.2	11222.7	14746.6	9934.75	12856.4	1.29409	0.371933	0.0422358
DAGLB	98160.9	96538.1	105860	90945.2	96790.9	110060	107372	97595.5	97876.1	102955	1.05189	0.0729806	0.309103
DAP3	443098	460764	492629	394462	438060	475888	472273	436012	447738	455558	1.01747	0.0249799	0.750506
DAPK1	8391.25	4941.02	9396.09	6763.01	9434.85	12333.9	11081.3	9692.7	7372.85	10635.7	1.44255	0.528621	0.0374788
DAPK3	26559.9	45476.9	28804.4	25211	28995.4	30290.9	26329.6	27930.3	31513	28386.6	0.900788	-0.150741	0.557726
DAPP1	41758.6	38134.2	38349.3	41789.9	54911.3	46139.1	47657.7	45103.2	40008	48452.8	1.21108	0.276291	0.0236765
DARS1	5.6704e+06	5.13225e+06	5905486	5.20511e+06	5.35745e+06	5.93178e+06	5.66728e+06	5.44176e+06	5.47831e+06	5.59957e+06	1.02213	0.0315845	0.612996
DARS2	518109	506502	576756	490161	512059	532512	536157	532549	522882	528319	1.0104	0.014924	0.797382
DAXX	67871.5	90970.7	73865.2	77495.4	68649.1	64086.6	72027.2	74449.7	77550.7	69803.2	0.900097	-0.151847	0.220164
DAZAP1	554291	474060	504977	564400	434787	423225	476368	600354	524432	483684	0.9223	-0.116692	0.417887
DBF4	19296	25701.6	32598.4	13319.1	18122	25529.6	21594.7	22299.8	22728.8	21886.5	0.962943	-0.0544781	0.85859
DBI	59817.4	22893.6	75227.7	37384.5	70084.9	77075	62634.5	69662.6	48830.8	69864.3	1.43074	0.516763	0.167185
DBN1	96630.3	121308	106930	101459	109476	106368	104823	102456	106582	105781	0.992482	-0.0108866	0.893035
DBNL	168911	200399	190379	165393	203746	193600	185974	177533	181270	190213	1.04933	0.069475	0.415492
DBR1	433614	414925	366981	356536	391642	342694	362830	442297	393014	384866	0.979268	-0.0302242	0.784768
DBT	117659	179830	135242	108907	119640	142848	143528	124426	135410	132610	0.979328	-0.0301362	0.877076
DCAF1	126353	132453	125129	113868	123064	123852	127438	131656	124450	126502	1.01649	0.0235942	0.658879
DCAF10	1	1	870.559	1	1	1	1	953.232	218.39	239.058	1.09464	0.130456	0.950981
DCAF11	63121	58174.8	63723.3	57953.6	59456.1	65865.7	62526.9	58720.8	60743.2	61642.4	1.0148	0.0211993	0.703525
DCAF12	119158	73236.3	56845.9	67343	101761	105092	105678	52892.8	79145.8	91356.1	1.15428	0.206988	0.540772
DCAF13	124873	83855.9	114701	104062	115252	107056	117479	112948	106873	113184	1.05905	0.0827705	0.530509
DCAF15	48143.8	32452.7	45406	42698.9	50032.8	37833.6	42302.9	45269.6	42175.4	43859.7	1.03994	0.0564966	0.70849
DCAF16	76386.1	84848.4	88956.6	74131.3	83445.5	95030.4	89548.1	79435.4	81080.6	86864.9	1.07134	0.0994154	0.281907
DCAF5	68899.1	51714.8	79110	61942.7	71362	73681.2	76809.7	76355.6	65416.7	74552.1	1.13965	0.188591	0.211816
DCAF6	11120.3	1	12600.9	11975	12699.2	14368.9	8452.57	15903	8924.31	12855.9	1.44055	0.52662	0.303331
DCAF7	222023	201637	222944	215811	208657	221110	213339	216748	215604	214963	0.99703	-0.00429121	0.913477
DCAF8	19581	15651	20881.3	14322.4	18575.9	21564.2	20898.8	22990.4	17608.9	21007.3	1.19299	0.254585	0.121213
DCAKD	32491.4	30052.8	31029.1	25951.8	29290.3	28602.4	27791.2	28981.4	29881.3	28666.3	0.95934	-0.0598853	0.455107
DCK	674839	582217	771403	608109	720397	744918	747836	692670	659142	726455	1.10212	0.140285	0.210464
DCP1A	90927	83160	94876.1	87291.1	94399.6	101069	99699.5	96273.6	89063.6	97860.4	1.09877	0.13589	0.0304504
DCP1B	22297.3	30258.7	24552.2	27966	26312	27116.5	28511	24212.5	26268.6	26538	1.01026	0.0147227	0.897864
DCP2	64569.4	56737.2	61674.4	57480.9	57233.5	55061.1	48644.3	56437.7	60115.5	54344.1	0.903996	-0.145612	0.07512
DCPS	465431	472850	497232	435874	456942	472060	478073	442479	467847	462389	0.988334	-0.0169301	0.729796
DCTD	276569	221733	236001	229312	221081	224240	241005	268599	240904	238731	0.99098	-0.0130725	0.898811
DCTN1	247806	291737	254848	236173	245498	255837	260528	259664	257641	255382	0.991231	-0.012707	0.86641
DCTN2	48558.8	58758.6	74995.7	56379.4	79852.8	71791	63465.5	49762	59673.1	66217.8	1.10968	0.150138	0.470721
DCTN3	165669	213752	179895	228136	176365	188189	186663	146890	196863	174527	0.886539	-0.173743	0.253037
DCTN4	247546	279867	249283	243359	229575	235964	243437	246204	255014	238795	0.936401	-0.0948021	0.149299
DCTN5	58077	61785.2	63125.5	53850.4	59872.3	63655.3	63365.4	59546.5	59209.5	61609.8	1.04054	0.0573324	0.358981
DCTN6	76552.9	87055.4	78252.4	68187.8	78997.4	71784	81193.6	88151	77512.1	80031.5	1.0325	0.0461461	0.641135
DCTPP1	32585.7	47436.6	61048.4	44269	58797.3	47659.1	43024.4	34416.1	46334.9	45974.2	0.992216	-0.0112745	0.964414
DCUN1D1	94717.6	105408	103916	90328.2	91526	92439	101748	96877.7	98592.6	95647.8	0.970131	-0.0437478	0.525144
DCUN1D5	242626	315964	255637	250315	250646	248998	222250	240005	266136	240475	0.90358	-0.146276	0.23006
DCXR	841257	776204	884872	735897	779864	849522	803088	826713	809558	814797	1.00647	0.0093065	0.892301
DDA1	63422.1	1	89211.5	71988.2	67324	76714	68251.5	77571.5	56155.7	72465.2	1.29043	0.367857	0.465524
DDAH1	137895	143784	163039	137910	85726.9	100480	98352.7	95268.9	145657	94957.2	0.651923	-0.617226	0.000931715
DDAH2	37724.3	53859.8	48814.4	41663.5	46511.6	50296.2	35467.6	36495.3	45515.5	42192.7	0.926996	-0.109365	0.542539
DDB1	1.67544e+06	1.69186e+06	1.7297e+06	1.56046e+06	1629834	1700225	1.68425e+06	1.71824e+06	1.66436e+06	1.68314e+06	1.01128	0.0161817	0.669192
DDB2	74396.4	1	89088.7	53226	77901.6	88326	86419.2	82542.8	54178	83797.4	1.5467	0.629198	0.226185
DDHD1	17708.7	1	1	1	22362.3	1	1	1	4427.92	5591.33	1.26274	0.336561	0.876029
DDHD2	39151.4	27489.7	41452.5	32404.2	36900.2	43560.4	39162.6	39078	35124.5	39675.3	1.12956	0.175764	0.259363
DDI2	109993	111653	107015	107004	105302	105914	97524.4	108866	108916	104402	0.95855	-0.0610748	0.162592
DDOST	3.96617e+06	3692395	4.00294e+06	3.82733e+06	3841105	4.08912e+06	3998301	4.09942e+06	3.87221e+06	4.00699e+06	1.03481	0.0493608	0.197615
DDRGK1	295385	433408	305241	354252	307088	301732	312744	326324	347072	311972	0.89887	-0.153816	0.348555
DDT	190335	213283	225872	264298	254391	245552	249067	222607	223447	242904	1.08708	0.120454	0.313395
DDX1	1.45662e+06	1.37608e+06	1.40837e+06	1.28351e+06	1337486	1.39122e+06	1.38695e+06	1.41347e+06	1.38115e+06	1.38228e+06	1.00082	0.00118607	0.9786
DDX10	119181	133953	126940	117443	110585	123254	118829	112837	124379	116377	0.935658	-0.0959463	0.147856
DDX11	9969.56	14062.4	11925	9770.09	10677.5	10397.6	10224.4	8757.33	11431.8	10014.2	0.875999	-0.190999	0.262505
DDX11L8	13194.5	1	15051.5	16492.9	1	1	12164	1	11185	3041.75	0.27195	-1.87859	0.147018
DDX17	2988454	3088941	3264015	2.70897e+06	3.09684e+06	3.18323e+06	3.14378e+06	3.07189e+06	3.0126e+06	3.12393e+06	1.03696	0.0523575	0.41229
DDX18	1.06179e+06	1072289	1.13388e+06	982319	1.07472e+06	1.05983e+06	1.07823e+06	1108422	1.06257e+06	1.0803e+06	1.01669	0.0238792	0.619553
DDX19A	1.0605e+06	1.14051e+06	1.13037e+06	927424	1.10284e+06	1.15126e+06	1.12311e+06	1.16419e+06	1.0647e+06	1.13535e+06	1.06636	0.0926918	0.248275
DDX19B	38035.7	29074.3	34641.1	24897.8	35033.3	32344.2	29971.4	32523.3	31662.2	32468.1	1.02545	0.036258	0.808137
DDX20	187840	175954	203749	169347	186956	201709	191864	189317	184223	192462	1.04472	0.0631205	0.371811
DDX21	2.94831e+06	2.78737e+06	3088853	2.7862e+06	2856349	2.95635e+06	2.9119e+06	2.8181e+06	2.90268e+06	2.88567e+06	0.994141	-0.00847811	0.839847
DDX23	601574	618664	641628	545804	582688	641342	635698	591107	601917	612709	1.01793	0.025636	0.686645
DDX24	241493	240011	247404	227019	240020	233935	251918	241721	238982	241899	1.0122	0.0175	0.62702
DDX27	409656	395915	404945	384339	393084	412101	430973	406991	398714	410787	1.03028	0.0430376	0.260796
DDX28	166342	164903	168422	155963	174459	182242	172540	164059	163907	173325	1.05746	0.0805981	0.0925875
DDX31	72020.3	65980.8	75930.9	61361.7	64849.4	64250.8	62463.1	66910.8	68823.4	64618.5	0.938903	-0.090952	0.286889
DDX39A	1.5497e+06	1425758	1.54039e+06	1.51071e+06	1.35415e+06	1.25047e+06	1.4554e+06	1662399	1.50664e+06	1.4306e+06	0.949533	-0.0747107	0.460869
DDX39B	10116259	9120267	10634629	9385242	9763396	9759134	10181560	9998020	9.8141e+06	9.92553e+06	1.01135	0.0162879	0.774329
DDX3X	2.83913e+06	2.6659e+06	3.12246e+06	2.67942e+06	2.91342e+06	3016412	2.95299e+06	2.95312e+06	2.82673e+06	2.95898e+06	1.04679	0.06597	0.303152
DDX41	209357	220257	222318	200197	205851	220229	206101	203442	213032	208906	0.98063	-0.0282197	0.544995
DDX42	1.08879e+06	1.04135e+06	1.1349e+06	952782	1.07606e+06	1.13639e+06	1.10054e+06	1074376	1.05445e+06	1.09684e+06	1.0402	0.0568569	0.367494
DDX46	1371715	1.42951e+06	1.47021e+06	1.26458e+06	1.35423e+06	1.41306e+06	1.37787e+06	1.36315e+06	1.384e+06	1.37708e+06	0.994994	-0.00724016	0.889697
DDX47	446414	483563	476767	392284	463031	478383	477408	445974	449757	466199	1.03656	0.0518009	0.501023
DDX49	226462	220927	205672	215025	201198	215526	218235	228960	217021	215980	0.9952	-0.00694109	0.890629
DDX5	7597093	7.27207e+06	8.2456e+06	6.9766e+06	7.69934e+06	7.92215e+06	7.97546e+06	8.02232e+06	7.52284e+06	7.90482e+06	1.05078	0.0714538	0.257528
DDX50	738034	659653	790688	683521	719303	749354	762677	725945	717974	739320	1.02973	0.0422669	0.531291
DDX51	149462	190197	167174	164517	164244	175536	171332	157129	167838	167060	0.995369	-0.00669699	0.937357
DDX52	161758	162927	176756	154043	165350	180202	176552	169904	163871	173002	1.05572	0.0782285	0.170687
DDX54	252089	252354	267940	228287	249395	254032	259993	241619	250167	251260	1.00437	0.00628599	0.909407
DDX55	146447	157195	153270	131980	152673	156317	151341	139189	147223	149880	1.01805	0.0258068	0.70626
DDX56	79503.3	85033.8	80343	78791.9	81173.9	82071.7	85843.4	77978.3	80918	81766.9	1.01049	0.0150556	0.706229
DDX59	28490.2	35385	30517.7	25590.4	31402.6	38146.4	36462.6	32944.1	29995.8	34738.9	1.15813	0.211792	0.119453
DDX6	1508667	1.45509e+06	1.52965e+06	1414665	1.44843e+06	1.47914e+06	1.49422e+06	1.49865e+06	1.47702e+06	1.48011e+06	1.00209	0.00301656	0.918476
DDX60	31860.5	1	19230.1	35715.9	38996.7	51347.6	49396.9	41153.7	21701.9	45223.7	2.08386	1.05926	0.0545749
DDX60L	50468.1	47892.4	27121.1	43833.8	43133.9	25816	24914.1	33742.3	42328.8	31901.6	0.753661	-0.408012	0.175332
DECR1	1.76515e+06	1.54091e+06	1.7584e+06	1.57121e+06	1.77722e+06	1.88577e+06	1.77692e+06	1.65834e+06	1.65892e+06	1.77456e+06	1.06971	0.0972218	0.180193
DECR2	63721.1	58095	77058	66928.4	75438.4	78609.5	78026.6	64746.3	66450.6	74205.2	1.1167	0.159238	0.182982
DEDD	1	4163.99	1	1	1	10565.6	8332.13	4182.92	1041.75	5770.42	5.53917	2.46967	0.135362
DEF6	121549	139245	132746	118133	131282	141279	141592	129944	127918	136024	1.06337	0.0886439	0.221054
DEFA4	41393.8	1	45855.4	20078	25059.3	22857.3	33021.2	19589.2	26832	25131.8	0.936633	-0.0944441	0.885236
DEGS1	93574.6	278990	108058	61557.5	92517.7	105906	101575	102135	135545	100534	0.741698	-0.431095	0.525182
DEK	2.34692e+06	2.36562e+06	2.46039e+06	2499666	2475946	2.50319e+06	2.49844e+06	2.36292e+06	2418150	2.46012e+06	1.01736	0.0248274	0.428482
DENND10	134925	148572	162064	131207	155273	151545	148246	139317	144192	148595	1.03054	0.0433974	0.600921
DENND1A	111525	122279	120982	109424	117752	128987	115711	132225	116053	123669	1.06563	0.0917042	0.197371
DENND2D	92642.4	85506.6	76067.5	97402.2	75212.1	65615.5	68070.5	105856	87904.7	78688.6	0.895158	-0.159785	0.420275
DENND3	13864.2	4198.39	18816.4	20737.6	15600.2	23291.2	20789.5	14555.5	14404.2	18559.1	1.28845	0.365641	0.374973
DENND4A	18786.3	22992.2	17195.3	17475.5	17752.8	18110.4	19323.8	18091.1	19112.3	18319.5	0.958518	-0.0611224	0.602165
DENND4B	50239.6	45204	57149	43697.2	48702.7	58703.1	54193.6	52117.9	49072.4	53429.3	1.08878	0.122718	0.287108
DENND4C	13426.8	18137.3	14230.9	15210.2	12480.7	16003.4	15197.6	15514.5	15251.3	14799	0.970345	-0.0434309	0.74004
DENND6A	29500.6	21509.3	35900.8	30599.5	33622.9	30124.5	31928.8	31616.8	29377.5	31823.2	1.08325	0.115367	0.476577
DENR	707407	829338	689987	816429	756637	764362	756936	798429	760790	769091	1.01091	0.0156555	0.837131
DEPDC1B	8435.68	21005.4	1786.41	11562.5	7585.98	15422.1	1	11188.3	10697.5	8549.33	0.79919	-0.323389	0.692312
DEPDC5	17489.2	14854.9	22605.4	16708.6	14194.8	19309.8	14473.5	19162.1	17914.5	16785	0.936951	-0.0939551	0.623503
DEPTOR	12743.4	1	15741	1	11116.8	8640.5	5347.18	1	7121.6	6276.38	0.881316	-0.182269	0.867427
DERA	252443	231993	271143	208915	253702	297421	278496	270509	241124	275032	1.14063	0.189826	0.0872114
DERL1	464405	315591	507481	335040	506402	484578	511186	489110	405629	497819	1.22728	0.29546	0.14606
DERPC	164031	250805	183171	212926	222973	217765	217720	193086	202733	212886	1.05008	0.070497	0.641366
DFFA	22671.4	25147.6	29229.1	22019.8	29797.8	27705.1	28666.3	27554.8	24767	28431	1.14794	0.199049	0.106886
DFFB	7316.95	6287.9	14795.8	6693.76	11003.7	13868.8	11145.5	8037.35	8773.61	11013.8	1.25534	0.328074	0.38423
DGAT1	227959	181996	188276	183408	208643	196058	161222	194253	195410	190044	0.972541	-0.0401689	0.731199
DGCR8	43814.8	55261.2	39855.3	41939.7	40069.3	44970.3	43966	44681.1	45217.8	43421.7	0.960279	-0.058474	0.648798
DGKA	156698	223878	214989	158486	175474	199038	182033	193112	188513	187414	0.994173	-0.00843187	0.956376
DGKE	73911.1	72139.9	124623	54900.7	84062.6	87283.9	91720.5	87765.2	81393.7	87708.1	1.07758	0.107792	0.703685
DGKQ	8472.58	4683.12	6049.64	1	10115	8502.54	8863.26	7771.04	4801.59	8812.95	1.83543	0.876114	0.106562
DGKZ	218285	192976	210432	192594	211195	203797	203044	208050	203571	206521	1.01449	0.0207561	0.685719
DGLUCY	474461	400684	263030	393716	453973	423490	473425	507140	382973	464507	1.2129	0.278457	0.161263
DGUOK	102865	80159.1	122199	78989.4	116453	118837	134170	126586	96053.2	124012	1.29107	0.368569	0.0665022
DHCR24	945282	843728	893330	654237	936446	830712	937684	960909	834144	916438	1.09866	0.13574	0.300803
DHCR7	650920	588211	552500	513958	658609	595396	620022	655426	576397	632363	1.0971	0.13369	0.154939
DHDDS	65028.7	69062.9	81506.9	69992.5	69868.4	77896.8	81912.6	72668.8	71397.7	75586.6	1.05867	0.0822528	0.384556
DHFR	427945	492639	519134	440511	499608	564939	557091	486129	470057	526942	1.12102	0.164807	0.100903
DHODH	332028	356690	370679	319237	338875	365480	353397	334453	344658	348051	1.00984	0.0141325	0.813405
DHPS	411461	435282	427719	391961	415026	435146	425781	421955	416606	424477	1.01889	0.0270029	0.493285
DHRS1	238908	223475	227828	225162	225294	202096	231147	242590	228843	225282	0.984437	-0.0226285	0.718608
DHRS11	8572.16	1	1	1	14969.6	18747.2	7613.78	13409.7	2143.79	13685.1	6.38359	2.67437	0.0106859
DHRS13	14669.3	42645.9	28233.6	27528.4	28178.1	31340.1	29170.9	35349.6	28269.3	31009.7	1.09694	0.133481	0.671723
DHRS3	91089.5	91182.7	90808.7	80283.1	79415.1	88358.4	90670.9	88601.7	88341	86761.5	0.982121	-0.0260274	0.682223
DHRS4	172404	173712	183266	173644	167115	195708	192320	193097	175756	187060	1.06432	0.0899253	0.191921
DHRS7	389840	387978	398435	354994	349298	369910	380115	362348	382812	365418	0.954563	-0.0670878	0.189178
DHRS7B	35841.7	51447.2	36590.8	23254.9	34111.7	34341.3	35908	36249.4	36783.7	35152.6	0.955657	-0.0654345	0.796236
DHRS9	981415	1.33425e+06	1.44066e+06	1.19702e+06	1157721	1.14078e+06	1.17193e+06	286337	1.23834e+06	939191	0.758429	-0.398915	0.276344
DHRSX	26029.9	37731.1	25511.2	27939.3	26760.3	31560	31652.3	25750.5	29302.9	28930.8	0.987302	-0.0184362	0.913768
DHTKD1	20848	21228.1	22159	15435.5	18399.1	21394.2	22463.1	23316.6	19917.6	21393.2	1.07408	0.103108	0.460981
DHX15	2.81277e+06	2623623	3.17772e+06	2.45625e+06	2.78656e+06	2.9918e+06	3.05166e+06	2.99784e+06	2.76759e+06	2.95697e+06	1.06843	0.0954862	0.318943
DHX16	262937	248613	272778	228150	246418	270861	267442	254894	253119	259904	1.0268	0.0381589	0.572645
DHX29	188662	198731	193827	167579	178982	185386	188716	189533	187200	185654	0.991744	-0.0119602	0.842629
DHX30	387424	372849	390948	344304	375407	387889	387197	376851	373881	381836	1.02128	0.0303732	0.518026
DHX32	16082.1	20459.3	16499.1	13072.9	14719.7	15285.6	15260.4	16689.4	16528.4	15488.8	0.937103	-0.0937201	0.55024
DHX33	133519	118730	138547	101128	120070	133030	125067	126112	122981	126070	1.02512	0.0357914	0.745801
DHX34	18237.2	18604.6	22351.5	18152.6	20339.8	21309.7	21306.4	24235.6	19336.4	21797.9	1.1273	0.172865	0.112171
DHX35	150005	103785	166929	109094	164038	160016	172093	160272	132453	164105	1.23896	0.309134	0.131533
DHX36	529607	551962	574458	432259	539045	551148	533323	552564	522072	544020	1.04204	0.0594114	0.535971
DHX37	173985	177873	193395	169987	174560	188468	184616	182131	178810	182444	1.02032	0.0290254	0.56623
DHX38	209011	220815	224978	168952	203394	228348	212789	210761	205939	213823	1.03828	0.0541989	0.598969
DHX40	30641.9	35776.1	31780.9	29946.6	31812.8	31702.1	32265.5	32037.6	32036.4	31954.5	0.997444	-0.00369217	0.953977
DHX57	50407.1	65306.8	55259.2	49659.8	50676.7	54505.6	51804.6	52209.5	55158.2	52299.1	0.948165	-0.0767901	0.490411
DHX8	179354	179042	183195	154132	166289	184540	177194	182791	173931	177703	1.02169	0.0309561	0.650501
DHX9	6.8907e+06	6.85625e+06	7.15082e+06	6397942	6776290	6.9188e+06	6855040	7.00943e+06	6.82393e+06	6.88989e+06	1.00967	0.0138783	0.71044
DIABLO	435305	492624	491553	394362	479677	524801	499870	456036	453461	490096	1.08079	0.112086	0.247142
DIAPH1	1.1899e+06	1.24933e+06	1.29611e+06	1.15197e+06	1270690	1285239	1.26621e+06	1.2624e+06	1.22183e+06	1.27113e+06	1.04035	0.0570734	0.219496
DIAPH2	70447.5	84499	87803.4	66267.8	76826.8	82813.9	77671.7	83102.7	77254.4	80103.8	1.03688	0.0522526	0.635023
DIAPH3	49666.1	54245	52602.3	46326.9	52034.7	55675.1	52837.8	50880.7	50710.1	52857.1	1.04234	0.0598241	0.337625
DICER1	87551.9	80032.7	87823.4	79322.5	79783.3	85903.9	85748.7	82811.2	83682.6	83561.8	0.998556	-0.002085	0.966418
DIDO1	141111	140305	145385	137727	148549	147178	153463	147102	141132	149073	1.05627	0.0789732	0.0110139
DIMT1	292728	322645	292314	242870	284366	282989	289364	282518	287639	284809	0.990162	-0.0142639	0.875312
DIP2A	22500.4	22645.9	34306.6	21117.1	22426.1	27660	29131.7	28759.6	25142.5	26994.4	1.07366	0.102531	0.61668
DIP2B	277285	278464	285261	232592	278188	292823	290144	276261	268400	284354	1.05944	0.0833025	0.284478
DIP2C	115577	1	227751	134439	246924	60237.4	315805	293387	119442	229088	1.91799	0.939595	0.194029
DIPK1B	29332.4	30401.2	40236.9	26086.6	22504.3	39074.7	31676.1	32288.1	31514.3	31385.8	0.995924	-0.00589262	0.97849
DIPK2A	129951	121940	111021	110468	112461	102600	107720	123171	118345	111488	0.94206	-0.0861087	0.326459
DIS3	971622	904575	1.02961e+06	874446	965322	1.01543e+06	991593	995002	945064	991836	1.04949	0.0696896	0.274904
DIS3L	33590	39638.4	38643.6	32923.5	31930.9	38568.7	35741.5	36240.1	36198.9	35620.3	0.984017	-0.0232449	0.801705
DIS3L2	96098.8	95609.2	101834	100749	80151.5	85015.7	85602.7	89416.1	98572.6	85046.5	0.86278	-0.212935	0.00173846
DISC1	19100	27362.4	19078.4	1	23704.3	1	9507.35	4687.32	16385.5	9474.99	0.578256	-0.790219	0.406777
DKC1	562698	547274	552226	549871	594524	552222	608784	567942	553017	580868	1.05036	0.0708849	0.114199
DLAT	1.29139e+06	1531837	1.32968e+06	1.24786e+06	1.15633e+06	1.2889e+06	1300752	1.13182e+06	1.35019e+06	1.21945e+06	0.903167	-0.146936	0.144639
DLD	1.45472e+06	1.81371e+06	1.71462e+06	1.64365e+06	1.69366e+06	1737823	1.69823e+06	1.59946e+06	1.65667e+06	1.68229e+06	1.01546	0.0221391	0.768879
DLG1	172047	209800	182613	162916	185737	186393	177550	178853	181844	182133	1.00159	0.00229105	0.979436
DLGAP4	42197.2	54227.3	58032.8	50721.1	42770.6	65080.7	55784.6	51301.5	51294.6	53734.3	1.04756	0.0670366	0.687278
DLGAP5	137226	173084	143962	142957	154740	141960	145466	141708	149307	145968	0.977636	-0.03263	0.718992
DLST	1.17637e+06	1.24895e+06	1.29024e+06	1.12865e+06	1.12098e+06	1259558	1.24958e+06	1.1363e+06	1.21105e+06	1.1916e+06	0.983939	-0.0233591	0.718248
DLX5	41953.1	57315.4	45726.7	38679.6	37541.6	38486.6	42645.1	33377.8	45918.7	38012.8	0.827828	-0.272597	0.148466
DMAC1	305923	1	312353	226506	326841	298980	305275	266815	211196	299478	1.41801	0.503868	0.314943
DMAC2	29593.8	50259.9	61499.3	42207.3	42772.3	45479.7	52308.3	31516.7	45890.1	43019.3	0.937442	-0.0931991	0.73379
DMAC2L	100795	136380	128197	108633	119755	126278	131126	108888	118501	121512	1.0254	0.036192	0.766584
DMAP1	154886	191713	171353	139606	160375	178116	163069	159604	164389	165291	1.00549	0.00789231	0.943769
DMD	1	1	6723.71	10513.6	20151.4	1	1	11879.4	4309.83	8008.2	1.85813	0.893849	0.5387
DMXL1	15871.7	11894.8	19706	12272.4	17720	18115.2	17830	17914.2	14936.2	17894.9	1.19808	0.260729	0.203429
DMXL2	29268.8	36441	46408.1	30141.9	24383.4	45269.8	38597.2	33251	35565	35375.4	0.994668	-0.00771257	0.975512
DNA2	19317	24909.1	21907.7	20140	20637.8	19282.3	22701.6	19997.7	21568.5	20654.8	0.95764	-0.0624443	0.554335
DNAAF10	124609	143994	135381	102234	122023	125312	123272	123882	126554	123622	0.97683	-0.0338202	0.766994
DNAAF2	2136.3	1	1	2035.27	1635.02	1	1	3429.53	1043.39	1266.64	1.21396	0.279724	0.833865
DNAAF5	331777	327514	353426	300797	328594	337421	337735	318304	328378	330513	1.0065	0.0093496	0.8644
DNAH8	361248	181366	534444	381525	540525	580984	519410	890780	364646	632925	1.73572	0.795538	0.0566482
DNAJA1	2.11249e+06	2.24043e+06	1.93489e+06	2.05163e+06	1.91612e+06	1.99703e+06	1.87609e+06	2.06425e+06	2.08486e+06	1.96337e+06	0.941728	-0.086617	0.169641
DNAJA2	1.15348e+06	1.0357e+06	1108947	1.02619e+06	1.10852e+06	1.15591e+06	1.08277e+06	1.19101e+06	1.08108e+06	1.13455e+06	1.04946	0.0696491	0.220043
DNAJA3	1.00348e+06	1.03599e+06	1040025	947457	990123	1.05732e+06	1.03187e+06	1.00596e+06	1.00674e+06	1.02132e+06	1.01448	0.0207427	0.597576
DNAJA4	12367.5	19984.2	15838.6	15699.2	9814.33	15508.6	15850.3	13310.9	15972.4	13621	0.852787	-0.229743	0.303618
DNAJB1	676147	743634	731745	664410	720581	751076	734980	703222	703984	727465	1.03335	0.0473345	0.344397
DNAJB11	449965	550555	422490	472450	470829	408287	460643	425436	473865	441299	0.931275	-0.10272	0.348526
DNAJB12	219185	225344	240826	189022	239480	250116	260662	227056	218594	244329	1.11773	0.160566	0.102897
DNAJB14	36268.3	49580.8	30479	23509.3	39306	43209.7	44233.7	43630.7	34959.4	42595	1.21841	0.285005	0.262344
DNAJB4	102314	101752	100896	89093.7	98930.7	105871	103883	90489.1	98514.1	99793.4	1.01299	0.0186145	0.792841
DNAJB6	20040.6	23203.5	18342.6	14968.9	19317.5	18366.3	17323	19054.6	19138.9	18515.4	0.96742	-0.0477858	0.745789
DNAJC1	102927	97199.2	97762.3	80895.3	102729	101538	106851	96452.7	94696	101892	1.07599	0.105671	0.238677
DNAJC10	244448	196017	230474	214082	229831	230696	241128	241442	221255	235774	1.06562	0.0916939	0.262899
DNAJC11	147600	151698	154599	132276	138499	148552	140907	139339	146543	141824	0.967797	-0.047223	0.434736
DNAJC13	206368	228452	223854	191172	208128	219736	216969	210822	212462	213914	1.00683	0.00982588	0.879904
DNAJC15	24654.3	1	31006.6	19947.3	5460.34	9290.17	12260.1	8094.46	18902.3	8776.28	0.464297	-1.10688	0.22828
DNAJC16	21413.7	29761.9	46743.3	26281.9	21271.8	23505.9	30264.6	33490.6	31050.2	27133.2	0.87385	-0.194543	0.558188
DNAJC17	48712.9	53184.5	44836.6	34698	49999.2	52141.1	47485.2	51746.6	45358	50343	1.1099	0.150435	0.299157
DNAJC19	353646	433093	441985	317467	409190	466711	444434	405224	386548	431390	1.11601	0.158345	0.249963
DNAJC2	266911	287942	276512	253903	261966	278159	271785	261495	271317	268351	0.98907	-0.0158562	0.735575
DNAJC21	199101	212923	189539	221874	196292	220708	197943	210580	205859	206381	1.00253	0.00364885	0.956707
DNAJC25	10987.7	1	15693.5	7891.54	13204.8	11266.1	11129.6	10838.5	8643.43	11609.8	1.34319	0.425662	0.436982
DNAJC3	897002	855324	948868	776221	913721	957040	945505	987617	869354	950971	1.09388	0.129458	0.107546
DNAJC30	109108	130745	129163	113831	117222	106762	112853	110365	120712	111801	0.92618	-0.110636	0.20373
DNAJC5	42877.6	38573.3	35640.9	35798.3	41646.3	40521.8	39081.2	40638.2	38222.5	40471.9	1.05885	0.0824963	0.280561
DNAJC6	23517.4	68080.8	37552.3	26431.7	30512.5	16541.1	21733.4	40416.2	38895.5	27300.8	0.701901	-0.51066	0.362915
DNAJC7	537450	594259	554527	484077	524661	540744	510938	558523	542578	533717	0.983668	-0.0237573	0.740672
DNAJC8	1.11017e+06	1.30945e+06	1.20796e+06	1.15738e+06	1.17783e+06	1.22397e+06	1.20395e+06	1.13948e+06	1.19624e+06	1.18631e+06	0.991698	-0.0120269	0.840937
DNAJC9	799917	989473	1089435	791051	991236	1.07432e+06	1.00278e+06	886867	917469	988800	1.07775	0.10802	0.432554
DNASE2	21787.6	1	58322.9	21904	25239.9	56127.1	67950.5	5121.85	25503.9	38609.9	1.51388	0.598252	0.511619
DNM1	104092	103026	112892	78846.8	105489	112260	113440	111272	99714.2	110616	1.10933	0.149683	0.23332
DNM1L	1.17298e+06	1.22384e+06	1.21614e+06	1.05453e+06	1.16297e+06	1.20487e+06	1.24103e+06	1.19793e+06	1.16687e+06	1.2017e+06	1.02985	0.0424288	0.456137
DNM2	1.03061e+06	1.03762e+06	1.14077e+06	936309	1.06667e+06	1.13742e+06	1.12175e+06	1079707	1.03633e+06	1.10139e+06	1.06278	0.0878407	0.222973
DNM3	37072.4	28115.3	38210.3	35551.1	47876.7	36577	38022.7	62841.2	34737.3	46329.4	1.33371	0.415443	0.150464
DNMBP	17804.9	15693.7	19650.2	17334.1	16703.8	17765.7	18004.4	17543.2	17620.7	17504.3	0.993392	-0.00956489	0.899508
DNMT1	917972	834967	910945	821278	867669	892687	880419	883071	871290	880962	1.0111	0.0159253	0.729353
DNMT3A	99028.5	98318.8	95603.5	80649.1	93905.5	102927	107527	98490.4	93400	100712	1.07829	0.108747	0.216606
DNMT3B	10069.4	1	21083.1	8848.68	12006.3	11519.2	23927.3	15462	10000.5	15728.7	1.57279	0.653322	0.317876
DNPEP	636766	637716	660299	612636	636420	661796	602928	693755	636854	648725	1.01864	0.0266432	0.608657
DNPH1	228198	227959	362165	288876	326804	327324	330333	306310	276799	322693	1.1658	0.221321	0.245971
DNTTIP1	65531.2	80290.7	82716	60623.6	74587.7	93222.3	85435.9	71579.1	72290.4	81206.3	1.12333	0.167787	0.272669
DNTTIP2	142069	170261	145948	161972	149081	154095	150503	136964	155062	147661	0.952266	-0.0705629	0.378524
DOCK10	160195	161784	166990	166606	176275	168666	231901	184335	163894	190294	1.16108	0.215467	0.160194
DOCK11	85042.8	82520.8	90011.8	82749.9	83057	93088.2	90629.4	89116.1	85081.3	88972.7	1.04574	0.0645202	0.209281
DOCK2	795477	718521	770222	626783	758853	762647	760482	783077	727751	766265	1.05292	0.0743986	0.379152
DOCK5	33060	46884.6	33694.2	36714.5	40333.8	40198.7	31042.5	38728.3	37588.3	37575.8	0.999668	-0.000479323	0.997554
DOCK6	50035.8	64091.9	57311.5	49994.5	52453.1	58737	54947.9	52201.9	55358.4	54585	0.986028	-0.0202997	0.844486
DOCK7	67924.7	69669.9	66750.9	64466.8	64657.4	66303.8	70911	63097.4	67203.1	66242.4	0.985705	-0.0207719	0.652412
DOCK8	322641	306371	325420	283041	311276	324290	316966	318437	309368	317742	1.02707	0.0385325	0.460101
DOHH	18852.4	14189.5	27329.3	18425	32713.5	28157.7	19922.4	23406.8	19699	26050.1	1.32241	0.403165	0.156233
DOK1	83015.7	41316.3	107476	83154.1	96623.1	77835.6	101984	90051.4	78740.5	91623.5	1.16361	0.218612	0.431832
DOK2	11324	22568.2	19828.1	17941	13648.1	21831.7	20234.4	15205	17915.3	17729.8	0.989645	-0.0150174	0.95421
DOK3	261750	265857	260437	248087	270922	280546	262545	286626	259033	275160	1.06226	0.0871338	0.0527325
DOLPP1	21944.7	1	18008.9	16147.8	23674.9	19217.2	23354	25804.6	14025.6	23012.7	1.64076	0.714366	0.158479
DONSON	39399.7	46886.7	38631.7	43157.3	40853.5	41780.5	42976.6	41467.3	42018.8	41769.5	0.994066	-0.00858686	0.905673
DOP1A	1	3278.03	2978.8	2654.58	2216.34	1830.33	2358.59	1	2228.1	1601.57	0.718804	-0.476331	0.527834
DOP1B	108491	121270	121393	100565	106567	114687	115744	112345	112930	112336	0.994738	-0.00761202	0.919367
DOT1L	15634.7	1	1	1	13058.5	15600.1	17386.3	1	3909.42	11511.5	2.94455	1.55805	0.219705
DPAGT1	45004.9	34719.6	30994	42761.8	37114.6	26804.2	32397.6	45485.6	38370.1	35450.5	0.923911	-0.114175	0.592146
DPCD	103175	85126.6	130781	77164	112361	130458	119339	116919	99061.7	119769	1.20903	0.273854	0.180286
DPEP3	94051.1	114627	112071	111215	84219.6	74821.7	82752.8	78773.8	107991	80142	0.742117	-0.430281	0.00506434
DPF2	193124	225396	212682	209054	191458	209030	196448	212501	210064	202359	0.963321	-0.0539119	0.392811
DPH1	101379	114916	86152	112023	93431.7	98339.8	81480.6	92404.7	103618	91414.2	0.882227	-0.180778	0.165267
DPH2	86485.9	82540.2	103211	85707.8	89093	97604.4	102069	91837.8	89486.2	95151	1.0633	0.0885527	0.349013
DPH5	62620.4	90452.9	62378	55504.6	54447.6	66759.9	58323.9	65947.1	67739	61369.6	0.905972	-0.142462	0.487209
DPH6	7438	1	11601.8	13704.6	8418.02	9294.92	11845.1	13936.2	8186.36	10873.6	1.32825	0.40953	0.457687
DPH7	34546.4	29288.8	36505.5	30155.6	34105.4	37054.9	33571.1	37810	32624.1	35635.3	1.0923	0.127371	0.198106
DPM1	939214	838612	1.05657e+06	871847	942122	1.08324e+06	1.08299e+06	1.02828e+06	926560	1.03416e+06	1.11613	0.158502	0.121662
DPM3	94507.3	66423.6	78857.2	101046	117932	83285.4	104316	92149.5	85208.6	99420.8	1.16679	0.222549	0.237871
DPP3	1.02959e+06	979165	1097579	937723	1.01317e+06	1.07079e+06	1.06441e+06	999686	1.01101e+06	1037012	1.02571	0.0366282	0.535706
DPP7	673433	639798	682903	666282	682650	702227	699763	732860	665604	704375	1.05825	0.0816793	0.0325465
DPP8	13602.8	1	17795.5	10016.6	17359.4	20319.3	18546.5	18109	10354	18583.5	1.79482	0.843843	0.117513
DPP9	122389	145244	140394	106734	125380	130560	132568	127485	128690	128998	1.00239	0.00344694	0.974626
DPY19L1	136582	101190	144186	113677	125007	121713	129073	135892	123909	127921	1.03238	0.0459806	0.722219
DPY19L3	76867.9	83220.7	104909	71354.8	65505.2	83234.9	71384.6	70892.3	84088.1	72754.3	0.865215	-0.208869	0.234476
DPYSL2	302314	311971	294820	252650	322679	341822	323973	332491	290439	330241	1.13704	0.185286	0.0495948
DPYSL3	1	1	4592.7	1	5483.19	24772.7	11470.5	1	1148.92	10431.8	9.07966	3.18264	0.178982
DR1	105183	141896	91610.7	109269	102944	107021	90785.2	120352	111990	105275	0.940046	-0.0891963	0.609085
DRAP1	351509	526085	416092	350330	353735	405505	410984	387219	411004	389361	0.947341	-0.078044	0.646281
DRC3	23178.8	1	31509.4	14143	1	1	38609.8	24317.5	17208.1	15732.3	0.914241	-0.129353	0.904047
DRG1	1.20979e+06	1.23068e+06	1.16278e+06	1.16354e+06	1.17835e+06	1.2117e+06	1.14899e+06	1.09185e+06	1.1917e+06	1.15772e+06	0.971488	-0.0417316	0.315066
DRG2	339124	316743	375391	307410	321328	334656	339557	350117	334667	336415	1.00522	0.00751463	0.919662
DROSHA	37326.7	38890.9	36781	34011.2	37218.4	40595.8	41970.6	36050.1	36752.4	38958.7	1.06003	0.0841068	0.251964
DSCC1	29029.6	28493.2	27913.9	19268	30569.3	31110.6	31338.7	31107.1	26176.2	31031.4	1.18548	0.245474	0.126514
DSG2	1.28026e+06	1.92668e+06	1.49009e+06	1.19684e+06	1.54154e+06	1.64059e+06	1.43104e+06	1.33639e+06	1.47347e+06	1.48739e+06	1.00945	0.0135678	0.940802
DSN1	16798.5	30693.4	20255.8	13986.2	16593.5	17166.8	17698.7	14431	20433.5	16472.5	0.806152	-0.310877	0.36023
DST	159607	332624	144307	124517	216344	186534	186663	189394	190264	194734	1.02349	0.0335003	0.932195
DSTN	140659	119640	94146	115442	111000	90667.4	104954	128248	117472	108718	0.925477	-0.111731	0.504572
DSTYK	1660.37	1	4048.43	3461.83	2645.82	243.763	3074.16	6168.46	2292.91	3033.05	1.3228	0.403591	0.64565
DTD1	149677	174315	182672	115951	136917	186895	178272	173052	155654	168784	1.08436	0.116838	0.508503
DTL	26334.8	31297.6	31625.9	24367.2	26109.9	30818.3	23794.1	21236.2	28406.3	25489.6	0.897321	-0.156303	0.326076
DTNA	1	1	1	1	1	4019.92	3775.7	1	1	1949.4	1949.4	10.9288	0.182003
DTNB	19173.3	25667	22898.7	24700.5	28239	27599.2	25058.6	23225.9	23109.9	26030.7	1.12639	0.171704	0.166213
DTNBP1	44394	53047.3	63166.2	39084.8	60160.9	57881.4	59127.5	54385.9	49923.1	57888.9	1.15956	0.213581	0.228792
DTWD1	24213.2	30721.1	16781	13226.7	15159.1	12996.3	33046.5	22638.8	21235.5	20960.2	0.987036	-0.0188248	0.964795
DTWD2	26496	27202.3	43386.4	26506.4	24898.9	1	13157.5	32433.3	30897.8	17622.7	0.570354	-0.81007	0.169058
DTX2	60911.3	67676.6	60542.9	46627.9	56053.2	67490.5	57398.7	57161.8	58939.7	59526	1.00995	0.0142821	0.914066
DTX3L	65775.6	73226.3	70600.5	57501.1	66130.5	67967.2	76084.6	67576.9	66775.9	69439.8	1.03989	0.0564359	0.54587
DTYMK	672682	808229	826975	727484	774956	865449	826186	771492	758843	809521	1.06678	0.093267	0.28488
DUS1L	28823.3	1	28429.3	24533.5	28640.1	32127.6	32024.1	30903.2	20446.8	30923.7	1.5124	0.59684	0.225439
DUS2	51064.5	50675.2	50807.9	44124.8	51246.9	56754.9	55637.2	52852.2	49168.1	54122.8	1.10077	0.138514	0.0599517
DUS3L	487486	443206	530992	452139	490417	510867	513430	491308	478456	501506	1.04818	0.0678796	0.338522
DUSP11	41454	47643.9	53515.2	46413.1	48409.3	64284.5	59253.4	44907.3	47256.6	54213.6	1.14722	0.198141	0.240424
DUSP12	103332	111353	115867	95842.3	106723	116921	112017	106355	106599	110504	1.03664	0.0519092	0.478695
DUSP23	186489	174540	208890	189983	191983	202356	191085	186006	189975	192858	1.01517	0.0217241	0.73244
DUSP3	130166	173832	152762	144750	151813	155624	158030	139618	150377	151271	1.00594	0.00854968	0.932823
DUSP9	51740	1	764085	1	38758.4	5971.37	7880.75	1	203957	13152.9	0.0644886	-3.95481	0.383068
DUT	1.09553e+06	1.24669e+06	1.14163e+06	1.08178e+06	1.18115e+06	1.23663e+06	1.17108e+06	1135220	1.14141e+06	1.18102e+06	1.0347	0.0492158	0.40006
DVL1	5433.19	41840.6	8622.43	6635.71	8000.24	9365.71	7750.96	7124.33	15633	8060.31	0.515596	-0.955686	0.451206
DVL2	36380.2	28169.3	42450.7	31436.1	39226.3	40482.7	42814.7	39357.9	34609.1	40470.4	1.16936	0.225716	0.154768
DVL3	10984.4	11248.7	13710.5	9781.06	12659.6	14784.8	13834.8	12878.2	11431.2	13539.4	1.18443	0.244187	0.0803593
DXO	10303.2	1	4973.24	9669.22	7666.16	9962.18	7736.37	9654.43	6236.67	8754.79	1.40376	0.489296	0.375352
DYM	128852	120471	116170	114809	111311	117773	109242	112866	120076	112798	0.939393	-0.0901992	0.105259
DYNC1H1	1227663	1.29234e+06	1.33775e+06	1095262	1.27354e+06	1347633	1309981	1286289	1.23825e+06	1.30436e+06	1.05339	0.0750371	0.304555
DYNC1I1	22383.8	1	29123.1	18993.3	18891.3	12495.9	22748.4	19978.4	17625.3	18528.5	1.05124	0.0720965	0.898347
DYNC1I2	528455	549208	576571	484638	543852	564894	567048	543990	534718	554946	1.03783	0.0535687	0.382773
DYNC1LI1	651049	719698	785490	633115	684179	828140	670406	667667	697338	712598	1.02188	0.0312294	0.779321
DYNC1LI2	132725	132637	149778	130555	142515	153779	146907	134249	136424	144363	1.05819	0.0816019	0.238914
DYNC2H1	17342.3	1	62623.2	17048	21670.2	25591.1	20034.9	36911.8	24253.6	26052	1.07415	0.103193	0.904494
DYNC2I1	1781.68	9320.17	1	2590.13	3121.78	5086.52	9111.68	3320.67	3423.24	5160.16	1.50739	0.592052	0.511166
DYNC2I2	14538.2	1	14399.2	12228.7	13905.9	13592.4	16527.3	18958.9	10291.8	15746.1	1.52997	0.613504	0.217704
DYNC2LI1	12631.2	16570.3	17941.9	13522.2	10480.5	16075.5	13208.1	15016.3	15166.4	13695.1	0.902992	-0.147214	0.432962
DYNLL1	200279	223437	282016	230131	217453	172488	203800	207191	233966	200233	0.855822	-0.224618	0.152317
DYNLL2	86862	115003	150643	90077.3	126260	118774	144142	128033	110646	129302	1.16861	0.224794	0.303492
DYNLRB1	76310.4	99255.3	105417	92326.2	99703.1	108761	101270	93064.9	93327.2	100700	1.079	0.109691	0.348783
DYNLT1	76248.8	74821.2	87910.4	62049	83011.6	86294.4	83083.5	77060.5	75257.3	82362.5	1.09441	0.130155	0.279102
DYNLT3	45277.1	31392.5	25278.7	37752.1	30637.9	9855.12	31405	55499	34925.1	31849.3	0.91193	-0.133005	0.778735
DYRK1A	103400	98719.2	114076	102420	118548	110023	117638	109962	104654	114043	1.08971	0.123948	0.0641056
DYSF	515172	464587	522941	433683	522568	519075	547834	539958	484096	532359	1.0997	0.137106	0.103445
E2F3	63372.6	84508.1	76733.8	60701.2	81311.5	81548	84853.9	71200.7	71328.9	79728.5	1.11776	0.160609	0.248641
E2F4	23394.9	34246	29874.5	26603.2	26801.8	34279.7	32020.8	27000.4	28529.6	30025.7	1.05244	0.0737353	0.633748
E2F8	48625.3	1	41211.8	51712.9	29495.7	75873.7	80500	38859.1	35387.7	56182.1	1.58761	0.666861	0.282446
E4F1	14730.5	21267.2	20153.9	13941.9	18366.5	17493.9	18070.4	18075.4	17523.3	18001.5	1.02729	0.0388424	0.814409
EAF2	15909.1	1	1	1	1	1	1	14664.8	3978.03	3666.96	0.921802	-0.117472	0.956017
EAPP	49108.5	46528.8	59036.9	58289.2	53529	61074.5	54737	63544.2	53240.9	58221.2	1.09354	0.12901	0.26241
EARS2	66712.5	71358.5	72184.1	63479.1	72467.5	73420.1	74099.5	70410.9	68433.6	72599.5	1.06088	0.0852553	0.132418
EBNA1BP2	162692	199889	188128	189850	175566	187554	189345	183041	185140	183877	0.993177	-0.00987699	0.889181
EBP	780382	608961	847657	487839	995890	960911	967615	937361	681210	965444	1.41725	0.503094	0.0386006
ECD	264252	313785	284370	266791	295808	273206	284963	282679	282299	284164	1.00661	0.00949853	0.887046
ECE1	17030.5	20107.4	19265.7	20037.2	26311.2	26078.2	19257.2	22365.3	19110.2	23503	1.22987	0.298501	0.0729648
ECH1	3.38636e+06	3.88975e+06	3881018	3.72412e+06	3.72645e+06	4.07182e+06	4.08293e+06	3967781	3.72031e+06	3.96224e+06	1.06503	0.090893	0.149201
ECHDC1	347737	352123	410408	310377	428931	437174	437160	368861	355161	418032	1.17702	0.235138	0.0569863
ECHS1	1043623	1.21054e+06	1.13453e+06	981194	1.10523e+06	1.1407e+06	1.11901e+06	1.08415e+06	1.09247e+06	1.11227e+06	1.01813	0.0259155	0.725245
ECI1	311343	378414	391076	301147	368246	414393	426045	331317	345495	385000	1.11434	0.156194	0.258299
ECI2	108827	112664	102176	88291.2	94794.2	91511.8	99094.2	103795	102989	97298.9	0.944746	-0.0820009	0.390828
ECPAS	553010	610182	602088	537432	604136	607123	605781	595059	575678	603025	1.0475	0.0669544	0.225108
ECSIT	174112	161486	208631	176156	194246	213081	207328	186482	180096	200284	1.11209	0.15328	0.146859
ECT2	24417.9	33417.1	30619.4	26110.8	27925.3	31813.7	32919.5	31934.5	28641.3	31148.3	1.08753	0.121054	0.336588
EDC3	499193	515222	543999	475352	478029	519157	528394	537184	508441	515691	1.01426	0.0204254	0.722417
EDC4	585493	595195	625032	511054	602472	635356	616454	603604	579194	614471	1.06091	0.0853001	0.244751
EDEM1	477500	450324	529075	377496	611178	650732	682609	550964	458599	623871	1.36038	0.444014	0.0082239
EDEM2	11777.1	1	11708.9	1	15817.9	14894.7	13513.8	15448.2	5872.02	14918.7	2.54064	1.34519	0.0742177
EDEM3	228825	243680	253713	196058	220588	236912	231877	211823	230569	225300	0.97715	-0.0333487	0.721233
EDF1	2.12053e+06	2.14152e+06	2.17543e+06	2174604	2142487	2.26401e+06	2.20646e+06	2.12792e+06	2.15302e+06	2.18522e+06	1.01496	0.0214175	0.397245
EDRF1	33735.3	42469.5	34763.9	31793.8	31267	33169.3	31515.3	32317.3	35690.7	32067.2	0.898476	-0.154447	0.219814
EEA1	73788	84273.8	77231	68541.3	80295.8	77845.3	81718.8	74914	75958.5	78693.5	1.03601	0.0510322	0.490242
EED	180374	159906	183545	155074	182583	173761	171047	188828	169725	179055	1.05497	0.0772052	0.311468
EEF1A1	138685777	152219361	149476449	141010785	141769233	143652769	144436849	150786337	145348093	145161297	0.998715	-0.00185529	0.962743
EEF1A2	835375	1034613	1.0285e+06	816889	811367	957812	1.05482e+06	949363	928844	943342	1.01561	0.0223446	0.858334
EEF1AKMT1	172178	177549	185451	181679	156577	151650	164959	195209	179214	167099	0.932396	-0.100986	0.30792
EEF1AKMT2	1	1	1	1	24962.4	7325.79	1	754.194	1	8260.85	8260.85	13.0121	0.249939
EEF1AKMT4	185416	189197	223159	150173	187354	211313	214835	197842	186986	202836	1.08477	0.117383	0.382851
EEF1B2	1.33239e+06	922256	1.82473e+06	1.20003e+06	2.03213e+06	1.88615e+06	1907591	1.51781e+06	1.31985e+06	1.83592e+06	1.39101	0.47613	0.0665244
EEF1D	5.95327e+06	7446360	6028923	6.40703e+06	6.87525e+06	6.74597e+06	6.58184e+06	6.46346e+06	6.4589e+06	6.66663e+06	1.03216	0.0456691	0.595402
EEF1E1	1.24362e+06	1.34422e+06	1.56517e+06	1.21684e+06	1.35014e+06	1468468	1.33264e+06	1.36751e+06	1.34246e+06	1.37969e+06	1.02773	0.0394611	0.684034
EEF1G	9025967	8416950	9825242	8582820	9278686	9608276	9391300	9080141	8.96274e+06	9.3396e+06	1.04205	0.0594203	0.326163
EEF2	14142254	14768281	14428847	13732527	14447869	14150748	14281428	14136385	1.4268e+07	1.42541e+07	0.999028	-0.00140311	0.95531
EEF2K	71611.6	56207.5	84758.2	60628.7	77916.1	79437.6	86144.9	80474.7	68301.5	80993.3	1.18582	0.245885	0.138321
EEF2KMT	19431.3	1	29349.7	13091.6	22998.4	20475	22152.4	25336.6	15468.4	22740.6	1.47013	0.555947	0.32343
EEFSEC	327807	307105	341512	322065	301069	304976	325926	357441	324622	322353	0.99301	-0.0101198	0.884093
EEIG2	37033	54068.7	42413.5	34442.8	46672.9	40794.1	39607.5	27072.5	41989.5	38536.8	0.917772	-0.123793	0.585742
EEPD1	54070.2	55246.1	59116	48068.8	41864.3	48110	47083.2	36141.1	54125.3	43299.7	0.79999	-0.321947	0.024183
EFCAB6	1	1	1	22599.1	30547.9	1	1	1	5650.53	7637.74	1.35169	0.43476	0.841791
EFHD2	858591	1.00429e+06	985133	893077	1.00294e+06	1.01046e+06	1.00567e+06	893366	935272	978110	1.0458	0.0646096	0.381472
EFL1	44330.8	54024.6	51767	44391.5	53369.9	55379.5	50212.2	42390.9	48628.5	50338.1	1.03516	0.0498499	0.668736
EFR3A	73610.1	54232.3	82724.3	64669.9	73356	81746.3	76959	67732.1	68809.2	74948.4	1.08922	0.123296	0.412515
EFTUD2	7453606	7.35122e+06	8.32986e+06	7098986	7.39565e+06	7.8722e+06	7.94411e+06	7603499	7.55842e+06	7.70387e+06	1.01924	0.0274981	0.647331
EGLN1	72481.6	59675.8	69078.3	64768	68482.9	63585.4	71584.7	64533.2	66500.9	67046.6	1.0082	0.0117884	0.875943
EHBP1	12380	19853.8	14572.7	10264	14170.8	13721.5	13810.8	12556.7	14267.6	13564.9	0.95075	-0.0728615	0.757602
EHBP1L1	99739.8	107344	107057	90884.1	103234	104467	107010	104815	101256	104882	1.0358	0.0507503	0.422576
EHD1	552314	564200	642756	472598	661353	739823	720979	621683	557967	685959	1.22939	0.297944	0.0292807
EHD2	11441.8	11507.4	13944.4	11769.5	16455.6	15591.9	14616.9	13523.2	12165.8	15046.9	1.23682	0.30664	0.0161858
EHD3	254559	219913	289772	208567	299240	290831	318566	311503	243203	305035	1.25424	0.326815	0.0373289
EHD4	94923.7	113484	101104	93815.2	105661	104142	116462	99007.8	100832	106318	1.05441	0.0764396	0.383303
EHHADH	290575	267203	304184	253991	277304	291499	295666	285455	278988	287481	1.03044	0.0432625	0.520263
EHMT1	96188.8	102653	95633.9	87803.5	95474.3	90966	95521.8	98489.2	95569.8	95112.8	0.995218	-0.00691497	0.899304
EHMT2	86117	87764.7	75407.8	81447.3	76364.4	76971.3	77872.3	85867.3	82684.2	79268.8	0.958694	-0.0608579	0.374906
EI24	184273	240323	186635	181662	175744	189814	192177	191362	198223	187274	0.944762	-0.0819768	0.500954
EIF1	284391	199602	404394	334770	293608	310999	360804	336089	305789	325375	1.06405	0.0895659	0.691047
EIF1AD	32006.2	37502.4	39510.4	32633.8	35624.7	38667.1	37002.2	32840.2	35413.2	36033.5	1.01752	0.0250508	0.789893
EIF1AX	703678	790832	1.04248e+06	905618	844801	919156	961555	1.05111e+06	860651	944155	1.09702	0.133595	0.372707
EIF1B	678399	828640	944530	741123	887500	924013	871830	642184	798173	831382	1.04161	0.0588099	0.713391
EIF2A	1.54566e+06	1.41735e+06	1.59715e+06	1.36725e+06	1.56525e+06	1.59716e+06	1.54446e+06	1515983	1.48185e+06	1.55571e+06	1.04984	0.0701742	0.267607
EIF2AK1	10945	1	15894.6	13018.8	1	16086.7	1	12542.6	9964.87	7157.84	0.718307	-0.477327	0.625298
EIF2AK2	319391	296803	348420	304493	335591	356206	358986	303365	317277	338537	1.06701	0.0935719	0.262221
EIF2AK4	11338.5	13824.2	10708.2	11081.3	11511.4	11867.5	13306.7	11018.8	11738	11926.1	1.01602	0.0229344	0.835274
EIF2B1	404747	402889	431369	388013	410320	418877	426381	427843	406755	420855	1.03467	0.0491653	0.22409
EIF2B2	117541	124576	132983	119652	132070	141312	135810	130063	123688	134814	1.08995	0.124261	0.0427174
EIF2B3	439209	501586	445703	408221	445336	457658	447488	449454	448680	449984	1.00291	0.00418723	0.951053
EIF2B4	602116	615444	640479	569117	591915	602419	596077	601338	606789	597937	0.985412	-0.0212009	0.596089
EIF2B5	511037	518443	509549	473408	530659	490127	517736	558371	503109	524223	1.04197	0.0593088	0.275232
EIF2D	270058	261058	246193	229440	249514	246482	260867	262906	251687	254942	1.01293	0.0185377	0.755433
EIF2S1	2.70283e+06	3.06351e+06	3108879	2.41431e+06	2.78488e+06	3.01442e+06	2.88965e+06	2.73098e+06	2.82238e+06	2.85498e+06	1.01155	0.0165689	0.861681
EIF2S2	1.98266e+06	2.55666e+06	1.82375e+06	2.06606e+06	1.876e+06	1.85358e+06	1.8003e+06	1.90403e+06	2107284	1.85848e+06	0.881932	-0.181261	0.213394
EIF2S3	1.87792e+06	1768772	1.87841e+06	1.86876e+06	1.8231e+06	1.81057e+06	1.86358e+06	1.86514e+06	1.84847e+06	1.8406e+06	0.995744	-0.00615271	0.805233
EIF3A	2.5155e+06	2.5792e+06	2.99525e+06	2.14289e+06	2.58452e+06	2.74433e+06	2.71204e+06	2.61939e+06	2.55821e+06	2.66507e+06	1.04177	0.0590382	0.588479
EIF3B	2.66552e+06	2238311	2706345	2.02464e+06	2.59487e+06	2.63993e+06	2.66692e+06	2.71333e+06	2.4087e+06	2.65376e+06	1.10174	0.139783	0.236889
EIF3C	3.25126e+06	3168336	3.65429e+06	2.87948e+06	3.25379e+06	3.43772e+06	3342062	3.38875e+06	3.23834e+06	3.35558e+06	1.0362	0.0513072	0.522699
EIF3D	2.80698e+06	3.10796e+06	3106091	2.51503e+06	2.84894e+06	2.92739e+06	2.99197e+06	2.964e+06	2884014	2.93308e+06	1.01701	0.0243365	0.755936
EIF3E	2.59527e+06	2.64389e+06	2.58435e+06	2.43986e+06	2.65218e+06	2.66509e+06	2605834	2.55964e+06	2.56584e+06	2.62069e+06	1.02137	0.0305124	0.326888
EIF3F	1580141	1.39602e+06	1.6425e+06	1.34282e+06	1.55023e+06	1.78279e+06	1760863	1591955	1.49037e+06	1.67146e+06	1.12151	0.165438	0.100677
EIF3G	1.35891e+06	1327960	1.58903e+06	1.31708e+06	1.44994e+06	1.40966e+06	1505160	1.38637e+06	1.39824e+06	1.43778e+06	1.02828	0.0402292	0.599031
EIF3H	2.21222e+06	2302978	2.39423e+06	2066504	2.27591e+06	2.37266e+06	2.35002e+06	2.29696e+06	2.24398e+06	2.32389e+06	1.03561	0.0504791	0.343477
EIF3I	1.10905e+06	994093	1.12307e+06	993912	1.07736e+06	1.07346e+06	1.10446e+06	1.16e+06	1.05503e+06	1.10382e+06	1.04625	0.0652232	0.28602
EIF3J	697708	1.07867e+06	806176	960197	771180	761440	794116	735491	885688	765557	0.864364	-0.210289	0.247953
EIF3K	818664	768067	923997	810852	916494	842761	867810	915570	830395	885659	1.06655	0.0929536	0.207838
EIF3L	1.14755e+06	1.13993e+06	1.14684e+06	1.04161e+06	1119176	1.17632e+06	1.07727e+06	1.07143e+06	1.11898e+06	1.11105e+06	0.992909	-0.0102664	0.830202
EIF3M	473390	490626	463423	405509	477613	458174	444526	446842	458237	456789	0.99684	-0.00456637	0.945608
EIF4A1	21168137	23147951	21234155	19987875	21919749	22596773	21220823	20792473	2.13845e+07	2.16325e+07	1.01159	0.0166299	0.759043
EIF4A2	493575	406488	501360	411465	485872	539547	498137	488653	453222	503052	1.10995	0.15049	0.149392
EIF4A3	2.56993e+06	2.31676e+06	2.60017e+06	2.32557e+06	2436930	2646174	2.59838e+06	2.47837e+06	2.45311e+06	2.53996e+06	1.03541	0.0501969	0.382376
EIF4B	1.56711e+06	1.76616e+06	2.03884e+06	1.22332e+06	1.77943e+06	1.88588e+06	1.87841e+06	1.62268e+06	1.64886e+06	1.7916e+06	1.08657	0.119781	0.480032
EIF4E	452307	430231	580826	364260	567867	596485	589663	541568	456906	573896	1.25605	0.32889	0.0776706
EIF4E2	53650.8	60842.8	63029.1	42707.7	55053.5	59541.3	63258.2	59872.1	55057.6	59431.3	1.07944	0.110281	0.423122
EIF4ENIF1	45869.7	61213.5	42410.7	41054.8	46087.3	45740.9	43111	44853.8	47637.2	44948.2	0.943554	-0.0838237	0.604741
EIF4G1	2.00812e+06	2.05261e+06	2.0325e+06	1.90111e+06	2.12251e+06	2.10314e+06	2.06582e+06	2.00044e+06	1.99859e+06	2.07298e+06	1.03722	0.0527244	0.137898
EIF4G2	897587	990641	926702	790703	917217	904308	902395	897489	901408	905352	1.00438	0.00629856	0.93086
EIF4G3	279649	386480	273491	298269	278820	252583	282867	268169	309472	270609	0.874422	-0.193598	0.236268
EIF4H	3020762	3.89709e+06	3.98878e+06	2.8693e+06	4.13432e+06	4.16564e+06	4.21397e+06	3.75006e+06	3.44398e+06	4.066e+06	1.18061	0.239531	0.118453
EIF5	1.2856e+06	1364236	1.33618e+06	1.03499e+06	1.26814e+06	1.38012e+06	1.30341e+06	1.3561e+06	1.25525e+06	1.32694e+06	1.05711	0.0801271	0.421601
EIF5A	5.94502e+06	6582444	7.31564e+06	5.50923e+06	6326818	6.52583e+06	6.55244e+06	6.55866e+06	6.33808e+06	6.49094e+06	1.02412	0.0343808	0.725126
EIF5B	1204022	1.32407e+06	1.34042e+06	1.24373e+06	1.21479e+06	1.30529e+06	1.25156e+06	1.24834e+06	1.27806e+06	1.255e+06	0.981955	-0.0262717	0.56649
EIF6	1.02216e+06	1.23828e+06	1.02043e+06	1.02639e+06	1.03023e+06	987532	1.02573e+06	972797	1.07682e+06	1.00407e+06	0.932445	-0.100909	0.272372
EIPR1	260536	239034	285735	230822	245066	279673	258389	282131	254031	266315	1.04835	0.0681248	0.451365
ELAC1	33342.6	1	73154	1	49942.7	63073.1	60426.3	58964.1	26624.6	58101.5	2.18225	1.12581	0.167288
ELAC2	852303	771153	919068	734320	803892	829856	889662	867561	819211	847743	1.03483	0.0493918	0.563905
ELANE	1.82494e+06	610223	1608621	1.5315e+06	775392	382738	532168	931297	1.39382e+06	655399	0.470217	-1.0886	0.0636987
ELAVL1	3.79028e+06	4.24579e+06	4.03811e+06	3610061	4267383	4.18554e+06	4.17142e+06	3.75493e+06	3.92106e+06	4.09482e+06	1.04431	0.0625555	0.374949
ELAVL4;ELAVL2	84021.2	1	133894	100471	133447	73451.8	89407.1	108534	79596.6	101210	1.27154	0.346573	0.526025
ELF1	347617	337218	353375	352694	393546	368675	382188	346914	347726	372831	1.0722	0.100569	0.0819084
ELF2	29206.6	45526	31351.1	30316.2	28085	31198.4	34035	31284.2	34100	31150.7	0.91351	-0.130507	0.508277
ELL	69934.2	60843.1	63358.9	64904.2	62484.8	61000.7	63967	69406.8	64760.1	64214.8	0.99158	-0.0121991	0.843943
ELMO1	1.13306e+06	1.13566e+06	1.15104e+06	899459	1.13099e+06	1.13183e+06	1.11337e+06	1.15902e+06	1.07981e+06	1.1338e+06	1.05001	0.0703979	0.438325
ELMO2	218280	218811	223467	194642	214072	222399	221222	213578	213800	217818	1.01879	0.0268586	0.593225
ELMOD2	54293.6	69595.4	66423.2	46134.2	54457.1	62018.8	60747	57522.7	59111.6	58686.4	0.992806	-0.0104162	0.944488
ELOA	46625	48073.9	53457.8	45486.2	47544.9	48051.3	48062	52050.7	48410.7	48927.2	1.01067	0.0153113	0.811477
ELOB	300575	308433	322569	352334	404635	348944	304541	348451	320978	351643	1.09554	0.131638	0.251514
ELOC	135951	132463	141295	135101	148224	134617	146945	153605	136203	145848	1.07081	0.0987077	0.0908643
ELOF1	1	1	9581.14	218694	1	1	1	1	57069.4	1	1.75225e-05	-15.8004	0.367574
ELOVL1	61709.3	76618.4	61388	69784.9	74344.3	67465.5	75007.4	70323.4	67375.2	71785.2	1.06545	0.0914692	0.332958
ELOVL5	102766	133360	136821	102668	169092	153088	140109	143877	118904	151542	1.27449	0.349917	0.0326351
ELP1	339606	341124	359429	320328	329056	336571	326441	339786	340122	332964	0.978955	-0.0306863	0.452146
ELP2	185164	177032	182487	159496	153321	179194	161868	182307	176045	169172	0.96096	-0.0574516	0.476044
ELP3	267733	288269	315372	239181	267019	292733	281541	262578	277639	275967	0.99398	-0.00871124	0.928536
ELP4	140799	161363	162932	144283	146262	151973	149813	149549	152344	149399	0.98067	-0.0281599	0.645918
ELP5	14061.3	16120.6	49119.2	21948	59387.4	52446.6	37985.9	36771.8	25312.3	46647.9	1.8429	0.881976	0.0788221
ELP6	74516.1	70983.7	87176.8	71205.2	79316.1	86077.3	79560.8	77427.2	75970.4	80595.4	1.06088	0.0852586	0.333995
EMB	7794.03	8000.89	20722	2146.83	6799.24	1	5586.67	6546.67	9665.93	4733.4	0.489699	-1.03003	0.309839
EMC1	847506	834896	876405	757314	798083	846415	867142	855228	829030	841717	1.0153	0.0219106	0.686487
EMC10	1	1	1	1	4931.47	7361.48	1	4622.74	1	4229.17	4229.17	12.0462	0.0706543
EMC2	503528	447650	558774	399166	467458	534818	509305	504424	477280	504002	1.05599	0.0785938	0.512999
EMC3	166738	177498	165163	149301	155864	167597	157072	148668	164675	157300	0.955217	-0.0661001	0.33815
EMC4	226426	219956	203928	178958	247298	217010	256644	221021	207317	235493	1.13591	0.183848	0.0979346
EMC6	166600	1	1	155807	119645	1	1	331101	80602.3	112687	1.39806	0.483428	0.738851
EMC7	157449	183126	194488	137519	195910	198008	195011	177381	168146	191577	1.13935	0.188217	0.165217
EMC8	137162	162167	156287	140671	144081	165334	150301	166488	149072	156551	1.05017	0.0706268	0.396964
EMD	77065.5	79934.3	105395	69281.1	116575	109947	113010	105315	82919	111212	1.34121	0.423535	0.0311839
EME1	15467.2	18171.8	17756.7	9390.94	17754.8	18604.4	20357.8	16254.4	15196.7	18242.8	1.20045	0.263577	0.237399
EMG1	949595	867614	941430	801414	845005	848640	941847	978653	890013	903536	1.01519	0.0217558	0.789272
EMILIN2	23996.6	13468.5	1	18832.9	19494.9	1	3204	12048.9	14074.8	8687.2	0.617218	-0.696148	0.458391
EML2	119889	110062	143802	109010	115834	132240	141738	135746	120691	131390	1.08865	0.122535	0.322084
EML3	146631	163249	152310	145539	147293	150907	147937	150133	151932	149068	0.981145	-0.0274623	0.535314
EML4	201736	193767	211724	181230	203748	201323	211661	215342	197114	208019	1.05532	0.0776831	0.198978
EMSY	11158.3	21766.2	16090.4	12134.4	16376.6	16406.2	17964.8	15764.3	15287.3	16628	1.0877	0.121277	0.620345
ENAH	1512.99	4195.98	2804.72	4892.68	6761.25	5801.29	7593.84	3264.82	3351.59	5855.3	1.74702	0.804898	0.0845336
ENDOD1	57408.8	93197.8	46995.2	67823.4	66323.5	61523.3	70531.4	63643.3	66356.3	65505.4	0.987176	-0.0186204	0.937776
ENDOG	120192	135930	141376	102959	121847	119546	120470	128295	125114	122539	0.97942	-0.0300012	0.788748
ENG	31664.9	38798	25670.3	32725.4	25023.4	22684.8	19557.9	23936.5	32214.7	22800.6	0.707771	-0.498645	0.0314036
ENGASE	51347.2	42977.4	51739.4	48914.3	47437.5	50453.7	53765.4	50683.9	48744.6	50585.1	1.03776	0.0534716	0.476991
ENO1	28697897	35997869	36640941	33497789	34903189	37817189	37072469	30766683	33708624	3.51399e+07	1.04246	0.0599916	0.57296
ENO2	18803463	22446527	23237205	18885685	21482533	19292679	20857213	18874591	20843220	20126754	0.965626	-0.0504637	0.612809
ENO3	13050844	16331085	11046843	15220965	9236318	7045870	9749990	13925688	1.39124e+07	9.98947e+06	0.718024	-0.477895	0.0807151
ENOPH1	287661	274489	251666	277669	258251	244677	273599	261392	272872	259480	0.950923	-0.0725997	0.217335
ENOSF1	11250.9	1	42538.2	26731.4	14519.1	11401.8	1	26487.5	20130.4	13102.3	0.650874	-0.619551	0.542785
ENOX2	3278.86	6685.31	3544.01	3623.03	3500.41	3760.17	4547.12	4398.51	4282.8	4051.55	0.946005	-0.0800801	0.7988
ENPP4	22066.8	34384	40088	28584	34333.3	39334	33072.8	29570.2	31280.7	34077.6	1.08941	0.12355	0.552494
ENSA	404210	642344	868202	446131	797436	776190	736205	530696	590222	710132	1.20316	0.26683	0.374616
ENY2	157234	267213	199424	181256	202151	211761	201519	152268	201282	191925	0.953512	-0.0686768	0.745197
EOGT	8832.64	9886.72	8448.94	9665.51	8411.88	10698.5	9271.11	9465.72	9208.45	9461.8	1.02751	0.0391559	0.67968
EP300	222037	188042	219636	192781	208086	218709	219284	225230	205624	217827	1.05935	0.0831761	0.27087
EP400	92312.3	87015	93432.3	81861.4	99250.9	98792.8	100046	93533.4	88655.2	97905.7	1.10434	0.143187	0.031301
EPB41	140936	140144	133476	119790	134536	134475	139222	130331	133587	134641	1.00789	0.0113442	0.850218
EPB41L1	15798	27619.2	10269.8	10647.3	13509.6	14372.3	9567.57	14602.4	16083.6	13013	0.809085	-0.305637	0.511853
EPB41L2	460302	444310	465463	424524	483773	480137	476848	461202	448650	475490	1.05982	0.0838259	0.0544673
EPB41L3	595430	599140	651974	568651	663175	637964	698706	677150	603799	669249	1.1084	0.148475	0.0257686
EPB41L4B	22031.7	1	21697.6	18278.5	37343.8	44711.8	57442.9	19407.4	15502.2	39726.5	2.56264	1.35763	0.0497551
EPB41L5	15334.7	22212.5	20792.5	15546.7	17720.6	19805.7	18331.6	19551.1	18471.6	18852.3	1.02061	0.0294267	0.847866
EPC1	12126	27415.2	16115.4	13476.5	15918.9	16995.6	16781.7	15752.8	17283.2	16362.3	0.946712	-0.0790027	0.808762
EPC2	15754.8	30031.8	18225.1	15213	16720.4	18705.4	18041.2	14446.9	19806.2	16978.5	0.857231	-0.222244	0.482289
EPG5	9012.45	10847.2	14399.5	11337.1	9744.35	10709.8	13272.4	12812.4	11399.1	11634.8	1.02068	0.0295256	0.87221
EPHB3	447430	674030	628799	566241	374879	530256	493037	371743	579125	442479	0.764047	-0.388267	0.0775059
EPHB4	159492	255684	202110	190403	211556	258839	184061	174215	201922	207168	1.02598	0.0369997	0.855484
EPHX1	321945	275656	312608	264510	335197	318707	315910	329818	293680	324908	1.10633	0.145787	0.107269
EPHX2	18083.9	1	25318.9	16859.1	21492.4	15697.1	29364	36149	15065.7	25675.6	1.70424	0.76913	0.18089
EPM2AIP1	37308.8	32058.7	45600.8	31725.6	37613	40497.9	41554.2	40339.1	36673.5	40001	1.09074	0.125301	0.385357
EPN1	104240	118063	142162	105165	149866	152281	144321	126237	117407	143176	1.21948	0.286264	0.0574249
EPPK1	27262.9	1	15785.3	38039.2	38430	49252.9	54977.1	29403.8	20272.1	43015.9	2.12193	1.08538	0.0670989
EPRS1	2288607	2.2726e+06	2.48525e+06	2.07526e+06	2201630	2.3837e+06	2.40916e+06	2.33324e+06	2.28043e+06	2.33193e+06	1.02259	0.0322213	0.614917
EPS15	141002	161670	155904	146232	164552	165659	152821	153399	151202	159108	1.05229	0.0735273	0.226306
EPS15L1	111826	128169	131119	104034	137979	135245	131478	113662	118787	129591	1.09095	0.125587	0.251772
EPSTI1	1	1	53093.9	51754.4	64180.3	1	77817.6	1	26212.6	35500	1.35431	0.43756	0.730599
EPX	10036.5	2646.77	9177.71	6375.87	9101.66	8800.03	10398.5	11477.9	7059.21	9944.52	1.40873	0.494395	0.183179
ERAL1	421234	412800	423220	345759	407049	406395	414393	396524	400753	406090	1.01332	0.0190857	0.794036
ERAP1	1.2174e+06	1.14086e+06	1.27005e+06	937279	1.21842e+06	1.27367e+06	1283247	1.2319e+06	1.1414e+06	1.25181e+06	1.09674	0.133218	0.228422
ERAP2	173948	176607	182932	150923	138404	175680	175736	209472	171102	174823	1.02174	0.0310346	0.82788
ERBIN	39794.2	44459.1	49641.9	45880	55853.2	58526.7	52022.5	44450.5	44943.8	52713.2	1.17287	0.230042	0.0858608
ERC1	79636.5	117930	85712.4	79889.8	82022.5	95913.7	88083.6	79284.9	90792.3	86326.2	0.95081	-0.0727709	0.674624
ERCC1	43535.5	33648.7	46829.5	42790.5	42608.6	50247.7	43518.5	53692.7	41701.1	47516.9	1.13946	0.188355	0.185447
ERCC2	161897	204996	159422	124468	139666	160918	145313	143288	162696	147296	0.905347	-0.143457	0.426738
ERCC3	69270.3	70755.5	70820.3	65138.5	65999.4	66495.9	67774.5	65709.6	68996.2	66494.9	0.963747	-0.0532734	0.156832
ERCC4	23574.7	20400.7	26790.1	25819.7	24227.3	22899.3	28985	29844.4	24146.3	26489	1.09702	0.133591	0.335175
ERCC5	75535.3	80080.5	77130.2	77002.1	84655	78054.4	84750.6	71986.2	77437.1	79861.6	1.03131	0.0444772	0.495769
ERCC6	37259.9	1	24610.3	38316.6	35384.6	31388.2	38823.6	16548.8	25047	30536.3	1.21916	0.285891	0.614134
ERCC6L	74271.7	81087.6	81628.7	69316.1	76481.8	81649.7	80396.7	78800.5	76576	79332.2	1.03599	0.0510137	0.432394
ERCC8	1	1	12116.3	1	22283.3	31730.4	33934.8	14548.7	3029.84	25624.3	8.45732	3.0802	0.00769718
ERF	34749.2	24695.4	63369.9	32402.5	47092.1	43417.9	40489.4	45732.9	38804.3	44183.1	1.13861	0.187279	0.573261
ERG	1	1	1	25569.3	36342.4	23714.9	20569.7	16504.8	6393.07	24283	3.79833	1.92536	0.0652282
ERG28	102582	273115	235590	241750	161673	263172	216777	256733	213259	224589	1.05312	0.074675	0.808873
ERGIC1	204537	207565	240659	193108	217179	225175	228091	212556	211467	220750	1.0439	0.0619809	0.442762
ERGIC2	92819.4	90377.1	100457	82922.1	83653	97455.1	89997.7	89173.4	91643.9	90069.8	0.982824	-0.0249953	0.74419
ERGIC3	47834.8	67694.9	48146.1	56975	46564.2	44947.4	47029.9	55896.9	55162.7	48609.6	0.881204	-0.182452	0.275929
ERH	180385	186975	206545	196506	189164	231624	194702	191199	192602	201672	1.04709	0.0663864	0.469821
ERI1	148198	180306	156530	102192	151253	136800	159699	164805	146806	153139	1.04314	0.0609319	0.735983
ERI3	224622	181184	127617	138532	197820	139810	143678	188721	167989	167507	0.997135	-0.0041395	0.986302
ERICH1	16439.8	25311	19344.9	24394.5	21919.8	23127.4	18725.8	17095.3	21372.5	20217.1	0.945938	-0.0801831	0.665522
ERLEC1	94070.9	95000.2	110742	87277.8	98685.8	103709	105105	100973	96772.7	102118	1.05524	0.0775686	0.367026
ERLIN1	186593	200094	203137	157019	176116	188056	188717	177296	186711	182546	0.977696	-0.0325426	0.727578
ERLIN2	1.61417e+06	1.77459e+06	1.6642e+06	1.48367e+06	1.52441e+06	1.70215e+06	1.69314e+06	1.53673e+06	1.63416e+06	1.61411e+06	0.987731	-0.0178097	0.804413
ERMAP	1	75781.6	1	27488.4	1	1	1	1	25818	1	3.87326e-05	-14.6561	0.244289
ERMP1	116262	121368	117430	103896	111127	118844	117610	112348	114739	114982	1.00212	0.00305779	0.956604
ERN1	6072.91	1	5601.23	4775.8	6693	6036.98	8924.66	7662.98	4112.73	7329.41	1.78212	0.833598	0.100814
ERO1A	832858	861051	784482	832009	881550	814878	818252	862394	827600	844269	1.02014	0.0287684	0.49385
ERP29	3.4639e+06	3.92509e+06	4783215	3.19057e+06	4.58627e+06	4.76501e+06	4.64895e+06	3.90805e+06	3.84069e+06	4.47707e+06	1.16569	0.221188	0.175336
ERP44	2.28534e+06	2727581	2.37855e+06	2695413	2.47298e+06	2.19688e+06	2.43526e+06	2.64422e+06	2.52172e+06	2.43733e+06	0.966537	-0.0491033	0.581423
ESCO1	18006.1	27435.5	22741.2	16567.5	15057.8	24063.5	21534.3	17872.5	21187.6	19632	0.926582	-0.110009	0.641295
ESCO2	34767.5	24859.9	36237.6	30068.9	31557.3	34912.1	32620.6	32702.1	31483.5	32948	1.04652	0.0655959	0.616235
ESD	3.79345e+06	3.70431e+06	3.92883e+06	3.71227e+06	3570708	3.45198e+06	3.71982e+06	4091689	3.78472e+06	3.70855e+06	0.979875	-0.0293299	0.636005
ESF1	59480	75583.2	62569.5	46553.7	55759.4	63685.5	62083.7	54827.2	61046.6	59088.9	0.967931	-0.0470236	0.774292
ESPL1	30994.7	28141.2	35650.6	30405.3	32352.9	33484.2	34047	31981.1	31297.9	32966.3	1.05331	0.0749239	0.375165
ESRRA	46385.3	71086.4	50925.3	45788.1	44724.8	45378.3	43092	46476.6	53546.3	44917.9	0.838862	-0.253495	0.243612
ESS2	12075	10463	13511.6	7589.28	15126.4	14655.6	14278	14076.3	10909.7	14534.1	1.33221	0.413826	0.0626117
ESYT1	620687	644727	660913	557665	626578	638168	638096	611077	620998	628480	1.01205	0.0172782	0.768938
ESYT2	765787	681684	783938	671150	735369	751159	739882	745355	725640	742941	1.02384	0.0339942	0.59103
ETF1	2.17037e+06	1865138	2.03703e+06	1.98666e+06	2.03458e+06	2099187	2.04562e+06	1.99524e+06	2.0148e+06	2.04366e+06	1.01432	0.0205163	0.689442
ETFA	961436	1.26394e+06	1.09667e+06	989143	1058899	1129112	1.09351e+06	991958	1.0778e+06	1.06837e+06	0.991254	-0.0126739	0.905371
ETFB	1.72121e+06	1.93551e+06	1.88491e+06	1.66631e+06	1.76991e+06	2.02939e+06	1.89544e+06	1.74874e+06	1.80198e+06	1.86087e+06	1.03268	0.0463917	0.542896
ETFDH	133628	153603	128686	126296	133219	135564	132304	130943	135553	133008	0.981219	-0.0273531	0.711303
ETHE1	602525	712568	575716	628839	581908	512556	569344	656457	629912	580066	0.920869	-0.118932	0.278761
ETNK1	59492.6	49332.1	52185.6	60067.6	64275.8	58538.3	60082.3	57010.1	55269.5	59976.6	1.08517	0.117917	0.190706
ETV3	19785.9	22103.6	28937.9	15472.5	26784.9	25062	26966.8	24691.9	21575	25876.4	1.19937	0.26228	0.224182
ETV6	11145.3	11529.5	13349.4	10734.5	16197.5	14957.4	17866.4	13281.5	11689.7	15575.7	1.33243	0.414062	0.0190242
EVI2B	138136	107651	183988	121286	166708	173736	135010	152291	137765	156936	1.13916	0.187965	0.357267
EVI5L	12837.3	23167.7	20114.7	6434.36	23355	16578	24023.5	19217.1	15638.5	20793.4	1.32963	0.411022	0.278059
EVL	168174	242169	195966	145649	205371	201788	196057	189659	187989	198219	1.05441	0.0764412	0.658946
[truncated: 5,437 more rows]

## Sheet: Proteomics_K562
Supplementary Table S3B: Proteomics data of K562 cells comparing NTC sgRNA and ACSL4 sgRNA
Protein	K562_NTC_1	K562_NTC_2	K562_NTC_3	K562_NTC_4	K562_ACSL4_1	K562_ACSL4_2	K562_ACSL4_3	K562_ACSL4_4	MEAN_NTC	MEAN_KD	RATIO	LFC	p-value
AAAS	760536	723169	572936	759485	537008	705254	738765	754246	704031	683818	0.971289	-0.0420268	0.773089
AACS	108456	92339.7	78143.4	92833.8	84466.8	96141.6	101362	105202	92943.3	96793.1	1.04142	0.0585532	0.634771
AAGAB	53691.8	45992.6	39345.1	37270.9	50251	48704.8	43734.1	45770.4	44075.1	47115.1	1.06897	0.096226	0.488827
AAK1	86652.2	85363.9	81081.1	85862.2	97471.6	83590.5	90464	94559.2	84739.9	91521.3	1.08003	0.111067	0.105769
AAMDC	21595.6	22577.9	29280.1	27829.2	22499.1	22851.3	29020.2	28414.2	25320.7	25696.2	1.01483	0.021235	0.889262
AAMP	326125	279405	248638	265422	240726	247064	276502	271091	279897	258846	0.924788	-0.112806	0.318932
AAR2	110659	97270.2	74308.9	105038	30506.9	94704.1	110275	111290	96818.9	86694.1	0.895425	-0.159355	0.650453
AARS1	2.19922e+06	1.96469e+06	1.8557e+06	2.08033e+06	1.85198e+06	2011499	2.07292e+06	2.01623e+06	2.02498e+06	1.98816e+06	0.981814	-0.0264781	0.69236
AARS2	374486	370695	370402	377753	322283	354006	369808	388379	373334	358619	0.960585	-0.0580148	0.371542
AARSD1	276816	298124	283464	282949	263553	262966	297162	283251	285338	276733	0.969842	-0.0441786	0.406637
AASDHPPT	727182	682500	614720	731714	562108	649691	721593	713376	689029	661692	0.960325	-0.0584047	0.574193
AATF	103577	108139	101510	121337	93439.1	102650	119004	105835	108641	105232	0.968621	-0.0459955	0.640001
ABAT	1	1	22026.7	1	1	1	24458.4	3219.41	5507.43	6919.96	1.25648	0.329385	0.866784
ABCB1	52590.7	54765	53121	46022.2	42487	26610.3	43458	19043.4	51624.7	32899.7	0.637285	-0.649988	0.047186
ABCB10	224097	236341	232118	238853	229957	229994	235358	224141	232852	229862	0.98716	-0.0186442	0.481982
ABCB6	55387.1	64790.4	56938.4	56444.2	64579.8	56831.9	61981.6	54165.9	58390	59389.8	1.01712	0.0244928	0.765823
ABCB7	475769	456311	403265	476052	411564	427743	467310	457899	452849	441129	0.974119	-0.0378302	0.606961
ABCB8	93413.6	89729.9	85856.2	97428	87964.6	84968.3	97915.1	87339.3	91606.9	89546.8	0.977512	-0.0328143	0.606457
ABCC1	90032.4	97988.9	89571.7	98316.2	95545.5	89783.4	100607	93681.2	93977.3	94904.2	1.00986	0.0141591	0.78818
ABCC10	6074.87	5586.28	4089.16	6499.91	5794.97	5002.58	6527.21	5350.92	5562.55	5668.92	1.01912	0.0273265	0.870428
ABCC4	153709	160910	158616	166304	165087	160217	176619	162949	159885	166218	1.03961	0.0560438	0.209567
ABCD1	82957.6	76710.5	74928.1	78797.7	84227.2	78485.1	87890.2	81935.3	78348.5	83134.4	1.06109	0.0855405	0.11898
ABCD3	120254	119266	136861	136110	115722	112693	124896	114028	128123	116835	0.911896	-0.133059	0.101146
ABCE1	1.58931e+06	1.53188e+06	1.53998e+06	1.5403e+06	1.49193e+06	1.55471e+06	1.50187e+06	1.48897e+06	1.55037e+06	1.50937e+06	0.973557	-0.0386629	0.0899392
ABCF1	2649789	2.72048e+06	2.5239e+06	2.6098e+06	2.20745e+06	2.55566e+06	2.5207e+06	2.65878e+06	2.62599e+06	2.48565e+06	0.946555	-0.0792417	0.253816
ABCF2	921969	869928	791273	955126	775061	865269	950849	911217	884574	875599	0.989854	-0.0147126	0.868648
ABCF3	400026	440559	438011	426567	457789	427486	461125	440307	426291	446677	1.04782	0.0673935	0.145751
ABCG2	13588.5	1	1	11357.1	1	12477.1	13772.1	11012.8	6236.89	9315.74	1.49365	0.578844	0.546132
ABHD10	128468	126243	125204	125480	151089	127088	122341	139123	126349	134910	1.06776	0.0945894	0.276547
ABHD11	210762	223177	216672	245305	238213	201748	228584	241417	223979	227490	1.01568	0.0224424	0.775406
ABHD12	67550	65134.1	59564	65712	61342.9	63341.2	72107	67735	64490	66131.5	1.02545	0.0362619	0.600193
ABHD13	9757.65	9853	1	2017.03	1	10242.8	1	7796.64	5407.17	4510.36	0.834144	-0.261632	0.816269
ABHD14B	460143	456167	422756	472622	422924	444388	464640	463523	452922	448869	0.991051	-0.0129684	0.78906
ABHD16A	143218	145350	132413	161291	141252	147924	165044	163457	145568	154419	1.0608	0.0851594	0.329758
ABHD17A	28534.9	25798.7	29671.1	37186.9	26277	27273.9	34555.4	24675.4	30297.9	28195.4	0.930607	-0.103756	0.544681
ABHD17B	21764.6	25134.7	23077.9	28992.9	20712.6	21432.1	24829.8	24999.2	24742.5	22993.4	0.929307	-0.105773	0.404296
ABHD3	18357.8	9732.97	10339.6	5592.73	2669.8	9356.3	13357.1	10505.1	11005.8	8972.06	0.815214	-0.294749	0.582723
ABHD4	31146.5	25245.6	28394.8	38559.2	28478.2	15740.6	39763.6	39309.5	30836.5	30823	0.999561	-0.000634151	0.998387
ABHD5	95712.6	77051.8	63316.8	99856.8	73773.4	75452.5	88547.5	90678.3	83984.5	82112.9	0.977715	-0.0325143	0.853125
ABHD6	62001.8	53019.5	34788.3	66834.9	36945.2	53304	67619.3	65441.1	54161.1	55827.4	1.03077	0.0437159	0.872773
ABI1	130999	105422	92849.4	101610	110972	102952	112165	107413	107720	108376	1.00609	0.00875426	0.942531
ABI2	106709	115260	105222	99467.3	79383.9	102098	107983	102511	106665	97994.1	0.91871	-0.122318	0.284462
ABITRAM	22365.3	13607.1	20028.3	23978.6	26192.9	19698.1	14252.7	23972	19994.8	21028.9	1.05172	0.0727468	0.776559
ABL1	239277	233597	220609	249650	204999	230467	242217	246773	235783	231114	0.980197	-0.0288567	0.69218
ABL2	86043.7	84164.6	76979.6	86696	74607.8	82750.8	89683.3	85486.8	83471	83132.2	0.995941	-0.00586846	0.933616
ABLIM1	4171.7	1	1	1	3439.18	1	1	3405.46	1043.68	1711.66	1.64003	0.713722	0.658304
ABR	63944	63379.3	57189.7	62232	52593.2	54904.9	67438.7	62399.9	61686.2	59334.2	0.96187	-0.0560856	0.563077
ABRACL	17213.9	7374.9	7568.1	13481.2	7918.4	10807.8	9581.12	13673.5	11409.5	10495.2	0.919861	-0.120512	0.749208
ABRAXAS1	19361.1	18890.9	12201.9	14544.3	20022.3	18000.1	15030.2	17689.6	16249.5	17685.6	1.08837	0.122173	0.50803
ABRAXAS2	139670	138630	129844	141934	125725	131443	150673	145764	137520	138401	1.00641	0.00921788	0.897532
ABT1	158398	159934	129732	179709	52401.8	141069	183522	178207	156943	138800	0.884396	-0.177235	0.603558
ACAA1	191422	170241	159993	181971	186046	194322	197077	210731	175907	197044	1.12016	0.163707	0.051602
ACAA2	982200	1.02596e+06	921671	1.10419e+06	1.02431e+06	1.02051e+06	1.07984e+06	1.17103e+06	1.00851e+06	1.07392e+06	1.06486	0.0906692	0.255642
ACACA	646608	641593	575491	668970	574228	637938	684994	644808	633166	635492	1.00367	0.00529071	0.941707
ACACB	22839.6	31316.5	21151.1	36477.1	17047.1	18126	20422.3	26143.7	27946.1	20434.8	0.731221	-0.45162	0.132846
ACAD10	15426	12514.3	9481.78	13787.2	10561	13098.4	15309.7	15519.4	12802.3	13622.1	1.06403	0.0895452	0.648573
ACAD8	87243.4	87520.8	86568.1	96896.4	78262.7	81564.5	89730.1	94550.8	89557.1	86027	0.960583	-0.0580185	0.46341
ACAD9	298890	312454	280473	295428	302934	292346	272714	281136	296811	287283	0.967897	-0.0470743	0.345218
ACADM	2.41916e+06	2.45192e+06	2.45241e+06	2.51444e+06	2.03474e+06	2.29304e+06	2.52814e+06	2553978	2459482	2.35248e+06	0.956492	-0.064175	0.444377
ACADS	72762.5	61072.3	59070.8	79437.9	70446.5	68315.6	69052.7	77432.3	68085.9	71311.7	1.04738	0.0667845	0.57306
ACADSB	241395	237245	227331	245988	218642	232580	240962	238220	237990	232601	0.977357	-0.0330422	0.431119
ACADVL	961681	991174	947676	989830	869206	968320	960588	995031	972590	948286	0.975011	-0.0365098	0.456012
ACAP1	70799	33775.9	28981.1	22754.4	75857.6	14587.2	25555.7	18966.1	39077.6	33741.7	0.863453	-0.211811	0.77592
ACAP2	54145.9	54782	57139.6	52334.8	49645.8	46694.1	50787.4	54135.6	54600.6	50315.7	0.921524	-0.117907	0.0649884
ACAT1	1.99872e+06	1878171	1.97957e+06	2.06391e+06	1.79965e+06	1.91309e+06	2046349	2071126	1.98009e+06	1.95755e+06	0.988617	-0.0165164	0.772611
ACAT2	1.14444e+06	1.1311e+06	1.06505e+06	1.2012e+06	1.06323e+06	1.13205e+06	1.1462e+06	1.24409e+06	1.13545e+06	1.14639e+06	1.00964	0.0138399	0.822666
ACBD3	413604	426116	390022	431464	436444	423704	454946	475668	415302	447691	1.07799	0.108343	0.0701427
ACBD5	20542.2	19968.7	12670.8	22504.9	2017.67	15682.9	24654.6	16969.8	18921.6	14831.2	0.783823	-0.3514	0.471666
ACBD6	105193	102903	112745	98298.9	118652	101031	112726	96406.3	104785	107204	1.02308	0.0329248	0.701847
ACIN1	1.65799e+06	1.67128e+06	1.58168e+06	1.61453e+06	1.52184e+06	1602800	1.70217e+06	1.70299e+06	1.63137e+06	1.63245e+06	1.00066	0.000956048	0.983149
ACLY	1.70989e+06	1.71446e+06	1623624	1.78018e+06	1564084	1.66053e+06	1.75934e+06	1.72635e+06	1.70704e+06	1.67758e+06	0.982742	-0.0251151	0.604644
ACO1	428512	393965	387205	444818	366696	400520	415362	422117	413625	401174	0.969896	-0.0440981	0.526314
ACO2	786400	774533	751645	793867	692646	768792	783801	767246	776611	753121	0.969754	-0.0443098	0.352865
ACOT1	1	1	1	1	68961.9	1	1	40239.5	1	27300.9	27300.9	14.7367	0.202968
ACOT13	1151005	1.21998e+06	1.0712e+06	1.14996e+06	1.02005e+06	1.10271e+06	1.17934e+06	1.22694e+06	1.14804e+06	1.13226e+06	0.986258	-0.0199625	0.783599
ACOT7	1.52611e+06	1.69387e+06	1.71689e+06	1.61276e+06	1449992	1.57103e+06	1.58909e+06	1.72072e+06	1.63741e+06	1.58271e+06	0.966594	-0.0490175	0.467862
ACOT8	89565.2	88966.3	80561.1	80390	79339.7	82635.1	84979.9	89527.8	84870.7	84120.6	0.991162	-0.0128066	0.829119
ACOT9	424597	401545	370717	431969	343008	381531	398299	419043	407207	385470	0.94662	-0.0791428	0.345498
ACOX1	280356	266489	271491	282970	252652	267949	284365	278944	275326	270978	0.984205	-0.0229691	0.610874
ACOX3	53444.9	39995	39068.8	52813.3	38074.7	42075.6	55016.2	54475.5	46330.5	47410.5	1.02331	0.0332444	0.859362
ACP1	1.15279e+06	835804	604487	1.04629e+06	899685	974946	973202	1.21521e+06	909842	1.01576e+06	1.11642	0.158875	0.483264
ACP2	114826	125744	119518	108812	114331	102188	128906	121216	117225	116660	0.995182	-0.00696786	0.936121
ACP5	54700.6	11910	37857.1	71808.3	2826.18	65654.2	87814.3	94135.4	44069	62607.5	1.42067	0.506572	0.482512
ACP6	4791.4	6701.96	5523.49	5240.62	5741.75	7037.92	7246.36	7945.69	5564.37	6992.93	1.25673	0.329679	0.059799
ACSF2	48811.7	46749.9	50175.8	44629.4	51850	50265	51186.9	51394.6	47591.7	51174.1	1.07527	0.104705	0.0552881
ACSF3	143816	129640	124525	134040	120977	128616	133038	137271	133005	129975	0.977217	-0.0332484	0.593814
ACSL1	227052	220771	211374	224771	222623	223845	216460	228246	220992	222793	1.00815	0.0117114	0.686594
ACSL3	1.06642e+06	1.00763e+06	941792	1.07032e+06	880755	994684	1.01395e+06	1.07341e+06	1.02154e+06	990700	0.969812	-0.0442229	0.564471
ACSL4	115789	108039	101175	110355	41814.2	44155.2	40584.7	43946	108840	42625	0.391632	-1.35243	8.53924e-05
ACSL5	19606.2	22078.8	43457	35797.5	24422.4	14878	36964.8	17273.3	30234.9	23384.6	0.773432	-0.370653	0.398642
ACSL6	16103.6	21203.4	15283.9	25645.7	1	22237.5	25151	26597.9	19559.2	18496.9	0.945688	-0.0805638	0.881633
ACSM3	696439	559992	613685	657163	426390	555248	674256	580042	631820	558984	0.884721	-0.176706	0.273519
ACSS1	100526	94101.3	93299.7	103358	94661.2	90963.2	97485.7	101834	97821.3	96236.1	0.983795	-0.0235703	0.653781
ACSS2	166783	145813	132792	161634	134163	162161	167138	176266	151755	159932	1.05388	0.0757092	0.519096
ACTA1	6435410	7003133	8392196	6338545	4.82993e+06	6.03479e+06	6433303	6889551	7042321	6.04689e+06	0.85865	-0.219857	0.175239
ACTA2	1.80232e+06	941839	1.11832e+06	789045	1.05747e+06	1.04155e+06	519922	679005	1.16288e+06	824487	0.709003	-0.496136	0.251723
ACTB	4239770	5.84365e+06	4.51888e+06	3.70919e+06	1.06924e+06	5289735	4.51558e+06	5.11597e+06	4.57787e+06	3.99763e+06	0.87325	-0.195533	0.621143
ACTBL2	971608	872202	649078	1.05672e+06	261545	716072	979911	1.0462e+06	887402	750932	0.846214	-0.240905	0.526561
ACTG1	77578537	87142097	77564761	85997321	65836005	72664457	85836833	90802609	82070679	78784976	0.959965	-0.0589463	0.630035
ACTL6A	756488	664249	671943	788727	563979	699492	771075	742595	720352	694285	0.963814	-0.0531728	0.656339
ACTL6B	64907.7	46046.9	26039.5	46202.7	1	54163.4	31573.4	55278.2	45799.2	35254	0.769752	-0.377534	0.518764
ACTL8	33769.6	72106.3	64915.7	32674.4	58200.3	68679.4	72970.6	46339.5	50866.5	61547.5	1.20998	0.274983	0.411702
ACTMAP	31704	20333.8	19265.4	37551.1	1	25965.2	43470.1	36395.4	27213.6	26457.9	0.972232	-0.0406276	0.945947
ACTN1	1.15666e+06	1.20935e+06	1.05699e+06	1.18046e+06	910408	1.10282e+06	1.16509e+06	1.20276e+06	1.15086e+06	1.09527e+06	0.951691	-0.0714343	0.484133
ACTN4	1.53566e+06	1.74564e+06	1.57436e+06	1.74193e+06	1.74928e+06	1.61006e+06	1.67399e+06	1759916	1.6494e+06	1.69831e+06	1.02966	0.0421625	0.486948
ACTR10	118506	99648	92308.8	102484	109989	98410.8	108148	112865	103237	107353	1.03988	0.0564108	0.546847
ACTR1A	937044	818989	785944	949346	685047	831137	898908	929160	872831	836063	0.957876	-0.0620897	0.610749
ACTR1B	30358.9	31943.4	29045.8	36045.2	23108.7	32509.2	34941.4	27636.3	31848.4	29548.9	0.927799	-0.108115	0.484413
ACTR2	783813	732762	650221	758076	825871	744346	719414	710289	731218	749980	1.02566	0.0365499	0.648533
ACTR3	1.41369e+06	1.34995e+06	1.42114e+06	1.53929e+06	1419066	1.35363e+06	1.44531e+06	1.51748e+06	1.43102e+06	1.43387e+06	1.002	0.00287729	0.958025
ACTR3B	621262	521196	474807	570020	713846	481566	549000	569739	546821	578538	1.058	0.0813413	0.608373
ACTR5	30194.7	31755.1	28196.6	33924.4	29953.4	30248.4	32276.3	35273	31017.7	31937.8	1.02966	0.0421715	0.612714
ACTR6	34938.9	32289.5	31454.6	35851.8	43360.9	35061.8	41025.5	34858	33633.7	38576.5	1.14696	0.197815	0.101176
ACTR8	49219.5	46973.1	41708.2	47225.3	50430.3	47310.1	45468.9	53890.4	46281.5	49274.9	1.06468	0.0904166	0.268074
ACVR1	6544.65	23439.5	12790.8	30531.4	1	28868.8	76788.5	39917.3	18326.6	36393.9	1.98585	0.989758	0.346592
ACY1	287408	310058	256898	307033	231916	271708	321033	321852	290349	286627	0.987181	-0.0186128	0.887301
ACYP1	390577	336386	385899	398664	371083	369385	436114	361562	377882	384536	1.01761	0.0251836	0.77606
ACYP2	53525.8	55848	50758.1	45295.3	40652.9	43281.3	58223.7	53086.5	51356.8	48811.1	0.950431	-0.0733464	0.613483
ADA	85363.8	84690.5	75906.9	96406.8	87138.4	84068.7	97124.4	95788	85592	91029.9	1.06353	0.0888647	0.345701
ADAL	42493.7	99278.4	125498	41819.4	207496	123304	182362	79206.7	77272.4	148092	1.9165	0.938471	0.0995733
ADAM10	307827	282965	262590	292837	268208	295520	280406	317451	286555	290396	1.01341	0.0192117	0.796334
ADAM15	14804.9	9819.53	4730.14	7835.4	10103.3	11576.1	14070.5	12628.6	9297.49	12094.6	1.30085	0.379452	0.287255
ADAM17	47767.4	46011.1	45032.8	52967.3	47606	43558.7	52540.2	53131.9	47944.6	49209.2	1.02638	0.0375585	0.675186
ADAM9	65521.8	24704.5	36865.1	27527.6	39484.2	32795.5	23540.3	54265	38654.8	37521.2	0.970676	-0.0429385	0.924078
ADAP1	6205.23	1	1	3389.52	1	1	5977.26	1	2399.19	1495.06	0.623154	-0.682339	0.684157
ADAR	729798	659553	621671	703273	610735	679113	643733	705874	678574	659864	0.972428	-0.040337	0.576008
ADARB1	1	9561.5	16934	6212.22	14077.1	1	14925.9	26389.3	8177.18	13848.3	1.69354	0.760039	0.418429
ADAT2	33203.5	12901.1	8152.53	13290	32694.2	31538.6	15099.7	31198.6	16886.8	27632.8	1.63636	0.710486	0.177488
ADAT3	57330.1	54484.7	51628.7	60675.5	56084.8	54457.3	53496.1	64229.9	56029.7	57067	1.01851	0.0264646	0.751475
ADCK5	8035.17	7993.41	7393.35	12062.1	1	7224.02	11520	9163.24	8871.01	6977.07	0.786502	-0.346477	0.522072
ADCY7	7861.94	1	1	14228.3	1	9955.41	1	1	5523.06	2489.6	0.450765	-1.14955	0.50453
ADD1	556505	483388	444913	612801	490365	529205	554528	604458	524402	544639	1.03859	0.054627	0.667628
ADD2	256370	283741	229548	278891	216692	252142	268428	278054	262138	253829	0.968305	-0.0464667	0.666118
ADD3	88366.2	84750.4	85343	85432.3	86128.6	83143.3	84947.9	87883.8	85973	85525.9	0.9948	-0.00752197	0.740439
ADGRE2	12223.9	1	1	1	1	15517.3	1	1	3056.72	3880.07	1.26936	0.344097	0.873347
ADGRE5	21932.7	14056.2	19369.7	19629.2	16769.5	17124.7	20000.1	15175.2	18747	17267.3	0.921074	-0.11861	0.481784
ADGRL2	603.823	6612.14	1	2454.87	11925	5952.86	6737.79	1544.27	2417.96	6539.97	2.70475	1.43549	0.169534
ADH5	1.18349e+06	1.17147e+06	1.12828e+06	1154820	1.0398e+06	1.13364e+06	1.1182e+06	1.16444e+06	1.15952e+06	1.11402e+06	0.960764	-0.0577465	0.19023
ADI1	193201	144155	137053	201326	113835	157282	220585	167453	168934	164789	0.975464	-0.0358388	0.885291
ADIPOR1	37132.8	16332.2	19988	34404.8	20494.7	24451.2	31337.8	34490.4	26964.4	27693.5	1.02704	0.0384909	0.909092
ADK	378945	386950	343894	385785	388142	416691	369565	400045	373893	393611	1.05274	0.0741426	0.214339
ADNP	115001	109957	105349	120235	106174	111705	121999	117432	112635	114328	1.01503	0.0215186	0.731325
ADNP2	17450.1	15814	14580.7	19899.1	14754.9	15321.6	20216.9	14814.3	16936	16276.9	0.961085	-0.0572637	0.719633
ADO	162294	155631	134213	148636	131596	152323	160432	163595	150194	151987	1.01194	0.0171203	0.854906
ADPGK	38131.6	32463.2	29298.6	44666.3	31300.5	36771.6	39343.1	41541.2	36139.9	37239.1	1.03042	0.0432262	0.795873
ADPRH	31544.3	39906.4	24218	29276.6	30591.7	27655.1	50163.8	30517.7	31236.3	34732.1	1.11191	0.153043	0.593117
ADPRS	164066	180640	153768	167740	166709	149056	169789	169489	166553	163761	0.983235	-0.024392	0.720367
ADRM1	1531336	1.38173e+06	1.37158e+06	1.33092e+06	1.37685e+06	1.3302e+06	1.25834e+06	1.43834e+06	1.40389e+06	1.35093e+06	0.962275	-0.0554791	0.397329
ADSL	1.18051e+06	1.03866e+06	968128	1.10574e+06	1.0209e+06	1.05445e+06	1.12832e+06	1.14454e+06	1.07326e+06	1.08705e+06	1.01285	0.0184251	0.808962
ADSS1	36073.5	25873.4	22539.7	27965.1	35705	27675.1	29520.8	27488	28112.9	30097.2	1.07058	0.0983964	0.590402
ADSS2	2.03292e+06	2126353	1.95321e+06	1938534	1.68003e+06	2.00246e+06	2.06081e+06	2.03027e+06	2.01275e+06	1.94339e+06	0.96554	-0.050592	0.517433
AEBP2	26918.7	19877.9	22777.6	28581	24076.7	21726.3	31516	24548.1	24538.8	25466.8	1.03782	0.0535506	0.759034
AFDN	171004	179302	169985	180014	168589	172878	181078	180203	175076	175687	1.00349	0.00502576	0.88382
AFF1	46131.4	58849.5	53813.8	61698.4	71032.6	64718.9	63078.3	65704	55123.3	66133.5	1.19974	0.262719	0.0397764
AFF4	76491.6	77446.4	62344.2	83114.3	58512.4	73405.9	83933	81361.3	74849.1	74303.1	0.992705	-0.0105627	0.942389
AFG1L	29089.1	29048.3	35909.8	32919.8	26626.7	23985.8	36103.6	31714.1	31741.7	29607.5	0.932764	-0.100416	0.530036
AFG3L2	759236	758599	726768	763103	678924	732877	767900	776080	751926	738945	0.982736	-0.0251237	0.613319
AFTPH	35289.5	33235.1	34208.5	32735.2	28544.3	26948.3	36702.9	30296.9	33867.1	30623.1	0.904214	-0.145263	0.228029
AGA	49079	28117.5	23724.8	26468.6	38957.6	32969.9	25992.2	43661	31847.5	35395.2	1.1114	0.152374	0.631128
AGAP1	69346.2	60262.5	82946.6	73598.6	78640.2	51759.4	69264.1	69374.4	71538.5	67259.5	0.940187	-0.0889806	0.581228
AGAP3	143981	151534	147946	163663	140908	144806	151019	153798	151781	147633	0.97267	-0.0399777	0.455826
AGFG1	183712	209043	205746	221176	206782	203110	233356	214966	204919	214553	1.04701	0.0662808	0.387092
AGFG2	32514.7	30041.8	26618.6	34144.8	30750.4	29492.8	30659	37368.7	30829.9	32067.7	1.04015	0.0567887	0.628286
AGGF1	19980.6	16494.6	14652.3	14842.3	18840.4	13571.2	17464.6	15016.9	16492.5	16223.3	0.98368	-0.0237393	0.88021
AGK	657256	610707	594799	658955	668145	646539	639912	698121	630429	663179	1.05195	0.0730643	0.170902
AGL	94435.7	98869.2	97661.4	107963	89770.4	87621.2	97053.2	91999.4	99732.4	91611.1	0.918569	-0.122541	0.0664508
AGO1	214797	195405	181778	204253	204334	186364	204541	199819	199058	198764	0.998525	-0.0021301	0.972808
AGO2	228116	216330	188394	228623	201058	201979	219927	222191	215366	211289	0.98107	-0.0275716	0.726314
AGO3	41868.2	35770.1	32278.7	39548.9	35080.2	37927.6	44090.7	33468.5	37366.5	37641.7	1.00737	0.0105885	0.933251
AGO4	1	1	37230.2	1	1	17053.1	18756.6	5927.6	9308.3	10434.6	1.121	0.164783	0.918091
AGPAT1	153641	139753	130591	141528	106441	158437	145290	172983	141378	145788	1.03119	0.0443068	0.785399
AGPAT2	87950.1	75967.3	38633.9	84245.2	13559.5	62982.1	82199.1	74180.9	71699.1	58230.4	0.812149	-0.300183	0.50953
AGPAT3	78511.4	91089.9	93826.6	77352.3	89496.2	76675.8	82083.5	65290	85195.1	78386.4	0.920081	-0.120167	0.345091
AGPAT5	130390	139736	119072	128768	117203	116933	129146	125322	129492	122151	0.94331	-0.0841957	0.213218
AGPS	250311	223244	209352	233874	205191	222663	228206	230914	229195	221743	0.967488	-0.047685	0.504317
AGRN	189648	144917	103980	133719	221050	165564	128422	192444	143066	176870	1.23628	0.306006	0.250509
AGTPBP1	4605.65	3326.18	2738.6	4550.06	3936.79	3731.93	4267.78	3710.54	3805.12	3911.76	1.02803	0.0398768	0.836586
AGTRAP	117829	239857	245512	200188	211327	196122	230985	104114	200847	185637	0.924272	-0.113611	0.721525
AHCTF1	274969	290981	277800	286701	259378	282635	291489	285906	282613	279852	0.990232	-0.0141616	0.745268
AHCY	11454934	11243641	10504938	12131818	10643631	10825503	11722410	11189325	1.13338e+07	1.10952e+07	0.978947	-0.0306979	0.584734
AHCYL1	138331	123462	117593	119764	132073	131809	123800	132157	124788	129960	1.04145	0.0585888	0.366836
AHCYL2	44910.1	36527.9	50512.8	51637.7	58708.8	46221.4	45524.7	49658.2	45897.1	50028.3	1.09001	0.12434	0.403735
AHDC1	18704.7	22374	20452.2	24837.9	18404.9	21173.3	24559.6	27293.2	21592.2	22857.8	1.05861	0.0821743	0.611482
AHNAK	1196684	1.23418e+06	1.14921e+06	1.27738e+06	1.16299e+06	1.27199e+06	1.29998e+06	1.30142e+06	1214363	1.2591e+06	1.03684	0.0521881	0.335482
AHSA1	2.85803e+06	2.73515e+06	2.55319e+06	2.68758e+06	2.41356e+06	2.50137e+06	2686751	2.63232e+06	2.70849e+06	2.5585e+06	0.944623	-0.0821887	0.140736
AIDA	113360	108160	95752	111068	109095	100999	112191	112440	107085	108681	1.0149	0.0213444	0.749663
AIF1	13398	18853.6	1	18115.2	12099.5	11524.2	1	27482.9	12591.9	12776.9	1.01469	0.0210345	0.980205
AIFM1	4074875	4.07813e+06	4.04322e+06	4.08876e+06	3.70977e+06	4.05068e+06	4058016	4.01287e+06	4.07125e+06	3.95783e+06	0.972143	-0.0407602	0.266852
AIFM2	73137	77990.1	76891.8	69213.9	87013.8	61715.2	73500.9	59282.9	74308.2	70378.2	0.947112	-0.0783931	0.590289
AIG1	1	3843.36	16224.9	12252.7	1	11852.7	12362.7	1	8080.49	6054.35	0.749256	-0.416469	0.705651
AIMP1	599254	610284	533493	673314	604558	586240	636800	547667	604086	593816	0.982999	-0.0247376	0.775335
AIMP2	1.08518e+06	935566	921119	1002068	778475	1.00608e+06	980552	928397	985983	923376	0.936503	-0.0946443	0.363567
AIP	328886	239276	209022	302541	282280	297059	284536	303667	269931	291885	1.08133	0.11281	0.488827
AK1	594673	499941	566651	565385	533753	522766	541873	527327	556663	531430	0.954672	-0.0669234	0.299885
AK2	2.25616e+06	2.8205e+06	2730597	3.11473e+06	2078294	2110074	2.72764e+06	2.66037e+06	2.7305e+06	2.3941e+06	0.876799	-0.189683	0.22524
AK3	1	1	33192.7	60525.7	12079.8	4966.13	84811.1	50368.9	23430.1	38056.5	1.62426	0.699779	0.559167
AK4	378665	357865	337750	399202	353021	366148	391097	378492	368371	372189	1.01037	0.0148793	0.815898
AK6	372249	358086	301072	339481	295066	324400	336722	392825	342722	337253	0.984043	-0.0232068	0.838661
AKAP1	117513	124147	114488	113142	128547	125942	114447	119724	117323	122165	1.04128	0.0583526	0.274996
AKAP10	17106.2	16588.4	16772.5	21403	21643.8	18786.1	21605.5	16153.8	17967.5	19547.3	1.08793	0.121579	0.401136
AKAP11	50793.5	44876.3	42157.4	48531.8	48846.5	48599.2	49754.9	52195.5	46589.8	49849	1.06996	0.097552	0.191705
AKAP12	5134.81	2731.57	5114.05	3166.99	6981.66	4803.77	6105.54	5854.73	4036.85	5936.43	1.47056	0.556363	0.0545799
AKAP13	10148.6	19835.9	1	13642.5	1	12330.1	5933.56	22721.2	10907	10246.5	0.939439	-0.0901281	0.92114
AKAP17A	171087	163044	141739	185354	162812	163079	176825	184283	165306	171750	1.03898	0.0551693	0.568693
AKAP2	1	188114	97219.6	230747	1	160450	67958.4	11165.4	129020	59893.7	0.464219	-1.10712	0.318787
AKAP8	107863	107994	108267	110158	109281	100542	101359	90510.8	108571	100423	0.924957	-0.112541	0.123467
AKAP8L	113885	108637	103685	109595	99876.6	104142	109460	114799	108950	107069	0.982734	-0.0251275	0.645713
AKAP9	57591.4	57250.4	57020.3	59803.2	63965.4	58170.1	62275.1	58898.2	57916.3	60827.2	1.05026	0.0707456	0.123537
AKR1A1	811367	793877	810474	815406	837322	778990	785712	782187	807781	796053	0.985481	-0.0210996	0.47079
AKR1B1	95965.1	55279.4	56045.7	30396.5	29085.9	28265	94438.8	53064.3	59421.7	51213.5	0.861866	-0.214465	0.704387
AKR1C1	954443	952056	941020	964268	937034	1.01684e+06	980671	1.02293e+06	952947	989370	1.03822	0.054114	0.161778
AKR1C2	40563.9	127371	102882	99548.7	35610.1	116796	163371	86924.2	92591.5	100675	1.08731	0.120759	0.812955
AKR1C3	44439.7	37834.4	33599	40741.1	43561.9	41773.1	36127.4	46315	39153.5	41944.4	1.07128	0.0993342	0.409067
AKR7A2	479627	447371	406956	483232	419495	426535	467760	483082	454297	449218	0.988821	-0.0162188	0.836539
AKT1	111175	106079	94393.7	123108	93364.3	110560	126272	107418	108689	109404	1.00657	0.00945101	0.939368
AKT1S1	75726.2	54906	47833.1	79152.9	35200.8	64270	113037	59774	64404.6	68070.5	1.05692	0.0798675	0.848105
AKT2	72443.4	67239.1	66674.7	72851.1	68832.7	64187.9	71207.3	72242.2	69802.1	69117.5	0.990193	-0.0142182	0.788096
AKTIP	15235.2	1	1	1	1	10936.1	20226.6	7725.07	3809.55	9722.2	2.55206	1.35166	0.336745
ALAD	69587.8	64305.9	56443.6	76776.9	78154.8	67228.2	68191.3	81138.1	66778.5	73678.1	1.10332	0.141852	0.261097
ALAS1	25635.3	25605.4	23874.3	24390	36980.8	22293.8	23725.2	25328.9	24876.2	27082.2	1.08868	0.122576	0.55978
ALB;SWISS-PROT:P02768-1	16585.2	13283.5	21038.8	17309.4	24842.8	12813.2	46245	1	17054.2	20975.5	1.22993	0.298576	0.718897
ALCAM	1	1	181988	1	142035	1	1	1	45497.8	35509.6	0.780467	-0.35759	0.868615
ALDH16A1	120179	103714	104121	117795	62869.8	106122	99963.7	127796	111452	99187.9	0.889957	-0.168192	0.440842
ALDH18A1	1.00326e+06	997793	1.02468e+06	1.04944e+06	1.01614e+06	1.00574e+06	1.01888e+06	996745	1.01879e+06	1.00937e+06	0.990755	-0.0134003	0.50177
ALDH1A1	24043.1	27830.4	26259.4	22385.6	25067.8	21114	28628.2	25055.1	25129.6	24966.3	0.993501	-0.00940677	0.936074
ALDH1A2	307787	350910	388836	372628	397381	288155	355771	394369	355040	358919	1.01092	0.0156742	0.904701
ALDH1A3	101782	80931.2	76948.2	58505.4	1	66229.2	59183.9	57606.1	79541.7	45755.1	0.575234	-0.797779	0.117675
ALDH1B1	589765	556735	572870	636764	457901	535982	621388	632415	589034	561922	0.953972	-0.0679809	0.573539
ALDH2	512612	510633	505863	511807	543988	539248	532201	530578	510229	536504	1.0515	0.0724445	0.00118191
ALDH3A2	12839	1	2445.64	16788.8	1	2539.95	3456.24	9389.52	8018.6	3846.68	0.479719	-1.05974	0.40203
ALDH4A1	50921	57837.5	56415.4	57438.8	55324.5	50995	59017	55903.3	55653.2	55309.9	0.993833	-0.00892477	0.886418
ALDH5A1	305073	295587	261830	303685	326145	310325	301152	320617	291544	314560	1.07895	0.109622	0.106971
ALDH6A1	169914	145032	154071	134917	160726	154482	150567	155920	150983	155424	1.02941	0.0418191	0.600087
ALDH9A1	877664	843528	788840	861044	755810	828207	820852	916514	842769	830346	0.985259	-0.0214244	0.758792
ALDOA	23543551	23624775	25898281	24106821	22358079	23357243	22168297	23266957	24293357	22787644	0.93802	-0.0923101	0.0652525
ALDOC	5422550	5234189	4939356	5318162	5699908	5.25358e+06	5382351	5.88189e+06	5.22856e+06	5.55443e+06	1.06232	0.0872246	0.120823
ALG1	96386.1	96854	110419	101581	128918	93129	96649.1	94481.6	101310	103295	1.01959	0.0279853	0.839649
ALG10	35172.3	35292.1	26931.4	31735.4	21210.6	27805	39494.1	24341.7	32282.8	28212.9	0.873928	-0.194413	0.408166
ALG11	59297.7	57117.9	56426.6	61393.1	43167.9	60238.6	61917.7	63676.9	58558.8	57250.3	0.977655	-0.0326034	0.804249
ALG12	11547.3	7570.35	4773.15	9893.14	10923.1	11390.5	7614.71	9905.99	8445.99	9958.59	1.17909	0.237676	0.414741
ALG2	56498	56283.2	51955	54328.1	49192	47253.4	57175.4	50087.9	54766.1	50927.2	0.929904	-0.104847	0.180521
ALG3	53059.5	58579.4	60910.8	47872	66293.5	55848.1	45747.3	44256.1	55105.4	53036.2	0.96245	-0.055216	0.740305
ALG5	217466	204589	167512	220732	169394	197254	217914	214235	202575	199699	0.985805	-0.0206256	0.86714
ALG6	47135.8	59978.5	54476.2	41239.5	63511.3	48416	44266.8	44155.9	50707.5	50087.5	0.987773	-0.0177485	0.923084
ALG8	242052	260261	225472	184059	260691	236207	202598	178248	227961	219436	0.962604	-0.0549863	0.738781
ALG9	361079	381843	311604	391899	283109	347501	413948	395163	361606	359930	0.995365	-0.00670225	0.962832
ALKBH1	38499.4	38714.1	40075.4	41256.2	40533.7	41234.9	41002.1	35397.4	39636.3	39542	0.997622	-0.00343477	0.953704
ALKBH2	55966.2	74044.5	74381.1	59306.2	40238.2	58752.9	62384.1	60559.9	65924.5	55483.8	0.841626	-0.248748	0.189454
ALKBH3	14016.5	13286.6	13202.2	15800.7	14277.8	15350.5	14751.2	20800	14076.5	16294.9	1.1576	0.211135	0.24717
ALKBH4	354934	266911	267484	326651	287524	306004	296672	370144	303995	315086	1.03649	0.0516998	0.714784
ALKBH5	118590	108189	112544	101851	109388	104708	107668	104069	110293	106458	0.965231	-0.0510544	0.367545
ALKBH6	94850.4	89191.3	82680.2	95923.7	75996	87418.4	99067.2	98035	90661.4	90129.1	0.994129	-0.00849515	0.935048
ALKBH7	35550.8	33512.6	34400.9	38754.1	34725.9	30385	36109.8	37283.1	35554.6	34625.9	0.97388	-0.0381844	0.642323
ALKBH8	13692.2	15609.8	10726.9	15217.7	18615.6	11172.1	13876.8	12751.5	13811.6	14104	1.02117	0.0302222	0.886245
ALS2	18587.7	1	23217	28094	24138.7	1	1	19216.1	17474.9	10839.2	0.620273	-0.689025	0.480511
ALYREF	2.31694e+06	2.65873e+06	2.42368e+06	2.54727e+06	1.66777e+06	2.2075e+06	2.71516e+06	2.78517e+06	2.48665e+06	2.3439e+06	0.942591	-0.0852963	0.628749
AMACR	13954.5	39813.2	9765.41	28299.9	23038.2	14168.3	34247.6	37309.3	22958.3	27190.9	1.18436	0.244108	0.644656
AMBRA1	68858.6	70830.7	58851.6	77552	66546.6	65187.8	73937	71838.7	69023.2	69377.5	1.00513	0.00738675	0.93914
AMDHD2	120814	109044	113230	136785	112573	113774	126447	123024	119968	118954	0.991549	-0.0122438	0.890881
AMER1	3511.73	1	1	2177.64	2731.41	1850.26	5487.82	3995	1422.84	3516.12	2.4712	1.30521	0.124729
AMFR	83475.9	78031.5	91194.9	93250.1	83366.1	87304	92186.2	93691	86488.1	89136.9	1.03063	0.0435204	0.557847
AMMECR1	266308	256159	237681	270338	230018	237178	243171	257600	257622	241992	0.93933	-0.0902956	0.147812
AMMECR1L	19016.2	21657.3	19543.7	21079.1	18365.1	17409.4	22517.6	23816.7	20324.1	20527.2	1.00999	0.0143468	0.909655
AMOTL1	15338.6	15650.7	14007.1	21034.1	27847.3	18452.4	12330.9	17556.8	16507.6	19046.8	1.15382	0.206419	0.514843
AMPD2	324370	310206	295561	312331	290935	312261	319127	322011	310617	311083	1.0015	0.00216363	0.961177
AMPD3	63069.3	55631.4	53508.6	59328.1	63409.4	56251	66687.4	60245.7	57884.4	61648.4	1.06503	0.0908892	0.265649
ANAPC1	440400	426723	376133	447671	402652	438428	464955	430180	422732	434054	1.02678	0.0381309	0.603546
ANAPC10	41362.8	48728.4	38928.1	45162.3	37206.6	41095.2	51519.9	50197.1	43545.4	45004.7	1.03351	0.0475548	0.736016
ANAPC11	16187.2	1	1	1	1	15954.8	1	18869.6	4047.55	8706.61	2.15108	1.10506	0.500439
ANAPC2	73655.8	70959.9	71343.5	72967.8	73418.3	68542.8	74635.9	69896.6	72231.7	71623.4	0.991578	-0.0122024	0.718153
ANAPC4	209654	193813	177162	189992	180185	188916	199894	183572	192655	188142	0.976575	-0.0341979	0.594684
ANAPC5	128457	127187	127526	131069	134642	125758	132626	122160	128559	128797	1.00184	0.00265855	0.942152
ANAPC7	270880	260009	254473	271294	260876	262717	270430	267395	264164	265354	1.00451	0.00648478	0.810832
ANGEL1	11839.8	1	1	8836.29	1	13454.6	5993.6	5468.59	5169.53	6229.44	1.20503	0.269069	0.805328
ANGEL2	22722.8	23222.5	15278.7	29667.2	17301.9	21436.9	27056.4	26868.6	22722.8	23165.9	1.0195	0.0278644	0.910332
ANK1	88966	81255.2	85729.3	131380	83937.8	90380.6	116123	89582.7	96832.6	95006.1	0.981137	-0.027473	0.898877
ANK3	84511.7	110573	103333	93913.6	126579	115288	139031	72718.5	98082.7	113404	1.15621	0.209401	0.379473
ANKFY1	122125	116537	105817	120559	124498	118067	122926	125024	116260	122629	1.05479	0.07695	0.185298
ANKH	14302.5	12956.1	10235.5	19633.4	1	10426.3	19769.5	14223.7	14281.9	11105.1	0.777567	-0.362962	0.526531
ANKHD1	605577	663129	599659	622569	620526	618259	630666	647416	622734	629217	1.01041	0.014942	0.701109
ANKLE2	59197.3	59821.4	59024.1	52475.6	60769.9	56083	59316.7	56125.1	57629.6	58073.7	1.00771	0.011074	0.83958
ANKMY2	90890.8	89163	82961.5	87935.4	89286	90872.3	91593.6	89636	87737.7	90347	1.02974	0.0422804	0.225627
ANKRD11	49186.6	45768.1	42533.8	49226.1	45332.4	44551.6	46036.6	48528.6	46678.7	46112.3	0.987866	-0.0176124	0.769051
ANKRD13A	118280	121509	119611	136158	137831	109911	136667	119551	123890	125990	1.01695	0.02425	0.802508
ANKRD17	220835	223645	217877	230629	267005	229240	225635	230004	223247	237971	1.06596	0.092147	0.229014
ANKRD27	44127.4	42242.3	41277.1	47667.3	40605.7	41677.9	47316.9	44270	43828.5	43467.6	0.991766	-0.0119286	0.86643
ANKRD28	136367	118616	106760	136304	141094	138269	122896	135108	124512	134342	1.07895	0.109624	0.291766
ANKRD40	24738.6	17147	1	1	15914.9	9361.62	24981.1	23657	10471.9	18478.7	1.76459	0.819336	0.319826
ANKRD44	32268	43208.3	38661.4	50884.1	52930.6	42205.7	51010.7	53648.9	41255.5	49949	1.21072	0.275869	0.122153
ANKRD52	31187.5	32907.5	30247.9	36523.3	38989.3	38044.5	33630.5	34778.7	32716.5	36360.7	1.11139	0.152361	0.10174
ANKRD54	99938.1	77025.3	1	57060.4	75290.1	84010.8	95103.5	79775.3	58506.2	83544.9	1.42797	0.513963	0.328414
ANKS1A	49520.2	59010.7	47835.1	61739	58534.6	55940.4	66324.7	60622.8	54526.2	60355.6	1.10691	0.146538	0.211895
ANKZF1	149637	140697	132696	145049	131524	142414	147702	146219	142020	141965	0.999612	-0.000560051	0.991779
ANLN	187627	192977	195314	189625	185964	192866	199893	205742	191386	196117	1.02472	0.0352281	0.364301
ANO10	64558.4	72770.1	71036.2	70146.4	56872.3	70433.6	73296.4	68993.2	69627.8	67398.8	0.967988	-0.0469386	0.607577
ANO6	31954	33366.9	31449.4	35398.8	31304.5	30078.7	33792.6	30889.8	33042.3	31516.4	0.953819	-0.0682124	0.248391
ANP32A	5263290	4241476	5.15132e+06	4363348	5531822	5.58072e+06	4.77502e+06	4.24916e+06	4.75486e+06	5.03418e+06	1.05874	0.0823544	0.526438
ANP32B	5.38936e+06	3.80227e+06	4.03444e+06	4.06766e+06	4231314	3.92037e+06	4.19177e+06	3.65358e+06	4.32343e+06	3.99926e+06	0.925019	-0.112445	0.448647
ANP32E	634815	547267	721049	640830	790407	653032	708985	501631	635990	663514	1.04328	0.0611224	0.7128
ANPEP	13938	13532.9	1	22152.1	8600.15	6814.01	13574.8	6755.3	12406	8936.07	0.720302	-0.473326	0.517393
ANTKMT	1	1	1	1	1	5373.12	1	8379.29	1	3438.6	3438.6	11.7476	0.196547
ANTXR2	12039.3	15790	12995.3	12902	9453.7	9965.73	14639.4	9640.31	13431.6	10924.8	0.813362	-0.298031	0.15043
ANXA1	7.42893e+06	6.85698e+06	7.18881e+06	7449908	7.80455e+06	6.99202e+06	7.79031e+06	6.80666e+06	7.23116e+06	7348385	1.01621	0.0232006	0.710127
ANXA11	551737	733317	768710	774341	1.09538e+06	733141	676739	745112	707026	812593	1.14931	0.200769	0.380059
ANXA13	232540	184553	237728	162358	233962	165242	195852	190190	204295	196312	0.960924	-0.0575056	0.74373
ANXA2	1.81555e+06	2.03333e+06	2129247	2118496	3.04335e+06	1.96514e+06	1.88653e+06	1.97178e+06	2.02416e+06	2.2167e+06	1.09512	0.131093	0.543126
ANXA3	533254	535455	476278	548238	452163	461694	575342	516653	523306	501463	0.958259	-0.0615121	0.534562
ANXA4	62753.8	77176.1	82832	84429.4	163140	84735.9	73865	80701.6	76797.8	100611	1.31007	0.389646	0.342244
ANXA5	3217035	3.38137e+06	3.342e+06	3477063	3.38807e+06	2869805	3566472	3.24839e+06	3.35437e+06	3.26818e+06	0.974308	-0.0375508	0.614681
ANXA6	180464	181691	166407	255256	338178	202914	216427	225340	195954	245715	1.25394	0.326467	0.235864
ANXA7	1.02767e+06	1193490	1.12512e+06	1.09599e+06	1.23431e+06	1.14968e+06	1.0796e+06	1.17351e+06	1.11057e+06	1.15928e+06	1.04386	0.0619245	0.339671
AP1B1	1.18824e+06	1.13368e+06	1.01618e+06	1.06862e+06	1.38557e+06	1.1542e+06	1.09549e+06	1.11256e+06	1.10168e+06	1.18696e+06	1.07741	0.107563	0.322085
AP1G1	658585	624739	587563	592267	625972	634484	594684	583091	615788	609558	0.989882	-0.0146721	0.772922
AP1G2	75300	72253.3	61765.1	65588.1	73539.5	68786.1	79924	60630.5	68726.6	70720	1.029	0.0412497	0.710369
AP1M1	435157	421476	411414	462403	362772	403219	450030	424877	432613	410225	0.94825	-0.0766609	0.347134
AP1S1	144266	147793	114444	154657	81204.2	128396	158842	144502	140290	128236	0.914078	-0.129611	0.557563
AP1S2	135626	126554	123625	142258	128384	114906	148436	131666	132016	130848	0.991156	-0.0128162	0.891088
AP2A1	1.17142e+06	1.1663e+06	1.1104e+06	1.17893e+06	1.00989e+06	1.17012e+06	1.1327e+06	1.17318e+06	1.15676e+06	1.12147e+06	0.969492	-0.0446996	0.442237
AP2A2	145055	144349	125193	143605	121934	139813	144528	140063	139551	136585	0.978746	-0.0309934	0.683582
AP2B1	1.06751e+06	1.03913e+06	931254	1.05281e+06	994654	1.01209e+06	1.0605e+06	1.02456e+06	1.02268e+06	1.02295e+06	1.00027	0.000390162	0.993885
AP2M1	1.02589e+06	969747	904686	986179	850366	936558	1.0104e+06	952765	971627	937522	0.9649	-0.051549	0.44592
AP2S1	832681	950394	954440	904547	582672	810113	1.1441e+06	884337	910515	855305	0.939364	-0.090244	0.671391
AP3B1	521370	505901	509699	520369	456803	501888	525311	486351	514335	492588	0.957719	-0.0623256	0.228857
AP3B2	1	1	1	90403	1	1	142975	1	22601.5	35744.4	1.5815	0.661298	0.768339
AP3D1	370005	374474	335686	347039	332241	353965	348180	325178	356801	339891	0.952607	-0.070047	0.194358
AP3M1	274295	272820	248843	283345	249072	270800	260832	262694	269826	260849	0.966732	-0.0488127	0.346209
AP3M2	20916.2	19732	14498.5	20164.6	23781.6	17967.9	18742	20228.2	18827.8	20179.9	1.07181	0.100055	0.514458
AP3S1	368593	376103	364013	382602	309547	339720	359188	384643	372828	348274	0.934143	-0.0982847	0.220178
AP4B1	26459.4	26489.1	20001.6	25163.9	10762.1	22975.9	30332.5	21505.5	24528.5	21394	0.87221	-0.197253	0.509653
AP4E1	22266.5	23342.3	13637.7	23394.7	23324.3	17821	20685.7	24276.5	20660.3	21526.8	1.04194	0.0592774	0.766721
AP4M1	20847.6	24214	27218	33577.5	26141.9	28059.2	30496.8	30581.7	26464.3	28819.9	1.08901	0.123018	0.464237
AP4S1	44082.5	46417.3	51585	54837.2	73662.7	48539.9	66692.9	54530.2	49230.5	60856.4	1.23615	0.305856	0.132885
AP5B1	25435.3	22086.8	20332.5	27896.5	26237.7	26163.5	28867.9	26492.3	23937.8	26940.4	1.12543	0.17048	0.175264
AP5M1	41206.1	40323.6	45195.3	40829.1	40060.3	37005.2	47718.9	42301.8	41888.5	41771.5	0.997207	-0.00403443	0.965031
AP5Z1	26578.8	25957.6	21554.6	27666.2	29444.9	26491.1	30323.6	27586.5	25439.3	28461.5	1.1188	0.161953	0.115826
APAF1	41540	39301.1	31584.9	44079.5	33550.8	38637.1	37197.7	36704.3	39126.4	36522.5	0.933449	-0.0993572	0.421186
APBA1	254082	136241	1	251253	1	134310	1	1	160394	33578.2	0.209348	-2.25602	0.128434
APBA2	11654.9	7838.65	15307	13962.7	1	12649.6	19704.2	11934.6	12190.8	11072.4	0.908254	-0.138832	0.812098
APBB1IP	1	138495	1	1	1	1	1	38578.1	34624.6	9645.29	0.278567	-1.8439	0.530845
APC	102494	108984	106677	118554	123713	100813	127545	123067	109177	118785	1.088	0.121677	0.229303
APEH	900436	846927	876626	861500	771280	833570	842773	849557	871372	824295	0.945973	-0.0801285	0.0771675
APEX1	1.70479e+06	1.31442e+06	1.33327e+06	1.63138e+06	1.35743e+06	1.45613e+06	1.57135e+06	1.77835e+06	1.49596e+06	1.54082e+06	1.02998	0.0426204	0.751578
APEX2	15348.1	14647.9	14729.5	12979.1	16303.6	13079.2	12786.2	15892.3	14426.2	14515.3	1.00618	0.00889108	0.935838
APH1A	53746.8	51137.9	49941.8	48117.2	65709.4	54955.1	50795.6	42453.4	50735.9	53478.4	1.05405	0.0759482	0.616199
API5	1.41602e+06	1.50815e+06	1.36171e+06	1.50955e+06	1.28428e+06	1.38067e+06	1.51815e+06	1.43372e+06	1.44886e+06	1.4042e+06	0.96918	-0.045163	0.494014
APIP	260118	233758	175270	266487	204319	235543	252977	248736	233908	235394	1.00635	0.00913367	0.952317
APLP2	19793	20060.1	13997.7	17264.4	15105.1	15748.1	17205.3	19754.6	17778.8	16953.3	0.953567	-0.0685944	0.654607
APMAP	581326	631318	614142	608663	583637	546883	598074	589744	608862	579584	0.951914	-0.0710972	0.105143
APOBEC3B	71747.4	78856.8	68633.6	64223.4	63386.9	68431.4	68435	65766.7	70865.3	66505	0.93847	-0.0916168	0.259541
APOBEC3C	294348	212474	197735	242290	154143	270285	200661	268287	236712	223344	0.943527	-0.0838639	0.71918
APOBEC3D	3810.46	1	1	5217.77	1	3267.01	1	1	2257.56	817.503	0.362119	-1.46547	0.399702
APOBEC3F	159228	137441	110126	126200	137244	150593	127697	140246	133249	138945	1.04275	0.0603928	0.640688
APOBEC3G	11516.4	16063.8	10000.7	11645.5	1	11544.4	13715.3	12253.2	12306.6	9378.46	0.762066	-0.392012	0.439933
APOBR	44538.3	38295.3	41248.5	47019.1	51280.9	43925	53066.6	36433.6	42775.3	46176.5	1.07951	0.110382	0.464678
APOE	59599.1	56145.2	64625.1	72310.4	82313.1	51281.4	75198.5	47046.8	63170	63960	1.01251	0.0179304	0.937033
APOL2	35247.8	30176.5	35037.8	30046.9	33300.7	26294.2	35437.1	27268.2	32627.3	30575	0.937101	-0.0937233	0.476225
APOO	267620	231650	248097	282891	243945	260798	301214	255537	257564	265374	1.03032	0.043093	0.657599
APOOL	592040	550445	487038	642614	471597	551453	600086	607498	568034	557658	0.981734	-0.0265961	0.826848
APPL1	122345	114378	109416	122360	125046	113343	127049	126815	117125	123063	1.0507	0.0713545	0.241003
APRT	6.21837e+06	6022417	5.55261e+06	6.43998e+06	4846719	5666228	6530665	6594766	6.05834e+06	5.90959e+06	0.975447	-0.0358643	0.758808
APTX	80706.6	72915.5	65315.7	87044	73116.1	76933.4	86000.1	87730.4	76495.4	80945	1.05817	0.081568	0.48052
AQR	493430	464548	450050	529473	440645	490410	524471	488612	484375	486035	1.00343	0.00493473	0.948364
ARAF	142109	141328	120957	130135	137087	141246	137733	132312	133632	137095	1.02591	0.0369025	0.555232
ARAP1	101463	101433	92098.4	109707	94192.4	103468	113246	99991	101176	102724	1.01531	0.0219179	0.783079
ARAP3	22302.6	17655.5	14643	24385.8	21394.2	20684	23228.8	22456.4	19746.7	21940.8	1.11111	0.152006	0.399061
ARCN1	1456122	1446233	1.41529e+06	1.5448e+06	1.35547e+06	1.33555e+06	1.49324e+06	1.4738e+06	1.46561e+06	1.41452e+06	0.965138	-0.0511936	0.341182
AREL1	14095.1	13000.3	14095.2	13376	11147.7	13469.1	13403.4	13653.7	13641.6	12918.5	0.946988	-0.0785826	0.326844
ARF1	124287	119208	102077	124176	36858.7	78902.8	110783	85681.9	117437	78056.7	0.66467	-0.58929	0.0774808
ARF3	4667104	5.57449e+06	5291450	4971801	4.32445e+06	4.70401e+06	4.71821e+06	4372557	5.12621e+06	4.52981e+06	0.883656	-0.178443	0.0480044
ARF4	1.17778e+06	1.48891e+06	1.11349e+06	1192752	960798	1.15743e+06	1236813	1.21529e+06	1.24323e+06	1.14258e+06	0.919042	-0.121797	0.376102
ARF5	472833	438092	432238	439402	231859	366833	451937	463577	445641	378552	0.849454	-0.235392	0.299567
ARF6	380668	370143	278282	350005	314175	332779	364794	358699	344775	342612	0.993727	-0.0090788	0.937014
ARFGAP1	123252	113567	119280	116767	113637	117828	124665	137983	118217	123528	1.04493	0.0634066	0.406367
ARFGAP2	393642	375156	355080	404840	355901	368764	437925	409738	382179	393082	1.02853	0.0405798	0.638688
ARFGAP3	26860	23136.7	25227.5	27327.2	29806.6	23115.7	26674.6	22243	25637.9	25460	0.993062	-0.0100447	0.932119
ARFGEF1	179900	183132	161215	191300	176431	175205	195132	188037	178887	183701	1.02691	0.0383146	0.568988
ARFGEF2	15583.3	15575.8	12283.8	18326.7	17331	15985.9	16983.1	17275.2	15442.4	16893.8	1.09399	0.129599	0.329096
ARFIP1	74754.5	75995.5	78897.6	91320	70042.4	70690.5	90693.1	71822.9	80241.9	75812.2	0.944796	-0.0819254	0.507206
ARFIP2	29909.1	40530	32288	46090.6	35721.4	30496.6	42940.3	42101.5	37204.4	37815	1.01641	0.0234844	0.902021
ARFRP1	15631.4	12934.6	11014	15215.1	18241.8	14028.8	13852.9	18437	13698.8	16140.1	1.17822	0.236603	0.193946
ARG2	28455.1	30091.4	20202	41679.1	1	27767.2	35008.8	25891.5	30106.9	22167.1	0.73628	-0.441673	0.411481
ARGLU1	347517	416242	429856	330663	331813	327460	341070	391503	381070	347961	0.913118	-0.131127	0.302196
ARHGAP1	525509	527170	482896	545288	482712	518062	565117	554834	520216	530181	1.01916	0.0273753	0.681105
ARHGAP10	18619.4	12446.5	21544.7	17199.1	1	27607	32634.2	17037.6	17452.4	19320	1.10701	0.146666	0.816622
ARHGAP11A	8657.26	8868.71	8178.86	6533.06	11264.8	7355.57	7910.94	8033.33	8059.47	8641.15	1.07217	0.100538	0.598046
ARHGAP12	116664	131739	137427	133488	144924	122472	152890	131733	129829	138005	1.06297	0.0881	0.360081
ARHGAP15	23871.3	23427.2	25791.2	17040.4	20596.3	24590	23087.2	25364.4	22532.5	23409.5	1.03892	0.055082	0.704197
ARHGAP17	186602	195362	159595	182575	183962	191522	184618	207119	181033	191805	1.0595	0.0833853	0.297161
ARHGAP18	331985	333304	334539	330775	311316	308275	338409	345746	332651	325936	0.979816	-0.029418	0.529721
ARHGAP19	68856.5	77921.5	64652.8	86742.2	72250.6	66720.9	82978.7	89251.5	74543.2	77800.4	1.0437	0.0617006	0.661791
ARHGAP21	10573.5	13495.1	11779.1	9256.49	12111.1	12183.5	13052.9	14072.4	11276.1	12855	1.14002	0.189062	0.186263
ARHGAP25	56097	59622	52624.1	54047.8	48424.6	52152	61071.6	59853.8	55597.7	55375.5	0.996003	-0.00577817	0.950777
ARHGAP27	1	1	7084.76	10114.3	2965.91	6787.34	1	7890.29	4300.26	4411.13	1.02578	0.0367259	0.973043
ARHGAP35	66672.4	63367.4	67591.6	76287.8	71430	67554.2	71673.1	68094.3	68479.8	69687.9	1.01764	0.0252298	0.704668
ARHGAP4	98711.1	83944.5	92238.3	90667.8	92356.1	95512.3	99476.3	89250.2	91390.4	94148.7	1.03018	0.0428989	0.491124
ARHGAP45	34181.6	30060.4	27091	34304.4	31986.2	31023.2	37396.3	34217.3	31409.4	33655.7	1.07152	0.0996574	0.357506
ARHGAP5	13096.9	12918.3	10032.2	13661.6	10574.7	10294.1	14333.6	12171.7	12427.3	11843.5	0.953027	-0.0694106	0.653121
ARHGAP6	58581.4	59236.6	56255.4	44464.2	60633.7	67637	89285.9	48561.4	54634.4	66529.5	1.21772	0.284184	0.267194
ARHGAP9	99032.5	107341	134547	112968	188724	90438.3	109602	107950	113472	124179	1.09435	0.130079	0.670501
ARHGDIA	3165244	3280084	3.44442e+06	3.21882e+06	2.9761e+06	3.00014e+06	3457478	3.17206e+06	3.27714e+06	3.15145e+06	0.961644	-0.0564256	0.368903
ARHGDIB	2378881	2.38747e+06	2.10123e+06	2.51076e+06	2.34393e+06	2336149	2.59431e+06	2442349	2.34459e+06	2.42919e+06	1.03608	0.0511394	0.456192
ARHGEF1	615378	567946	559501	625648	596045	594542	620842	617439	592118	607217	1.0255	0.0363272	0.448694
ARHGEF10	24353.2	20477.1	19190.5	20993.2	22463.9	22371.5	22925.8	23088.3	21253.5	22712.4	1.06864	0.095778	0.277754
ARHGEF11	20987.3	26011.4	24805.5	22399.7	35337.8	18389.6	24023.5	20424.6	23551	24543.9	1.04216	0.0595765	0.815401
ARHGEF12	45942.2	56080.3	55066.9	45397.1	38400.2	47487.2	60222.2	47994.6	50621.6	48526	0.958603	-0.0609949	0.709485
ARHGEF16	67014.3	64038.1	65327.2	66140.3	69023.2	65070	70764.2	66819.6	65630	67919.2	1.03488	0.0494649	0.169551
ARHGEF18	31520.4	29081.7	29341	32288.4	34992.8	31311.7	32305.8	29769.2	30557.9	32094.9	1.0503	0.070799	0.304067
ARHGEF2	1.32118e+06	1.31526e+06	1306741	1.2886e+06	1.31462e+06	1322901	1.29365e+06	1.31813e+06	1.30795e+06	1.31232e+06	1.00335	0.00482252	0.664132
ARHGEF40	1	6017.02	3464.06	11897.9	6181.97	8392.54	7999.78	3774.56	5344.99	6587.21	1.23241	0.301481	0.671497
ARHGEF6	116269	126548	112270	120958	144170	135332	106720	129645	119011	128967	1.08365	0.115903	0.311798
ARHGEF7	49038.8	51014	43191.2	53623	51407.6	51171.8	50863.4	53451	49216.7	51723.4	1.05093	0.0716689	0.345366
ARID1A	2.86713e+06	2788916	2.21572e+06	3.03136e+06	2.5916e+06	2.76361e+06	3180141	2789865	2.72578e+06	2.8313e+06	1.03871	0.054797	0.645345
ARID1B	62341.8	66142.3	62556.7	70491.9	64701.7	66892.6	66226.4	62405.1	65383.2	65056.5	0.995003	-0.00722672	0.886124
ARID2	123108	120335	112272	130102	119339	126605	132668	122017	121455	125157	1.03049	0.043326	0.462472
ARID3A	135836	131419	128749	134903	112349	129527	144319	134102	132727	130074	0.980017	-0.029122	0.722434
ARID3B	105233	111204	102052	116972	78823	101409	121785	116224	108865	104560	0.960458	-0.0582056	0.694921
ARID4A	9558.45	8809.39	6292.8	7917.87	11268	7855.21	6920.7	11264	8144.63	9326.99	1.14517	0.195563	0.416445
ARID4B	58520.9	62885.8	62227.3	60300.7	62542.2	56217.5	60685.4	52185.4	60983.7	57907.6	0.94956	-0.0746694	0.289284
ARIH1	105604	80733.4	79503.9	77764.9	103163	93150	72847.9	97085.2	85901.5	91561.5	1.06589	0.0920582	0.565459
ARIH2	134695	122820	112451	121551	113274	133389	124790	140904	122879	128089	1.0424	0.0599063	0.514253
ARL1	504686	496396	428288	510579	358630	451922	523730	470151	484987	451108	0.930145	-0.104473	0.430991
ARL13B	2519.5	6875.09	7160.64	1	13720.8	6647.61	1	7265.46	4139.06	6908.72	1.66915	0.739117	0.439475
ARL14EP	43921.6	41709.8	44518.4	49983.2	40471.2	45053.5	51318.6	51540.7	45033.2	47096	1.04581	0.0646146	0.54631
ARL15	109407	105011	110622	104353	99610	84223.6	125435	99746.5	107348	102254	0.952542	-0.0701459	0.596286
ARL2	365628	401772	365008	399133	379375	380754	383632	386138	382885	382475	0.998927	-0.00154887	0.970501
ARL2BP	78355.8	107405	76090.5	50610.6	54119.4	57009.2	130357	88354.7	78115.6	82460.2	1.05562	0.078087	0.84552
ARL3	240094	238067	263412	244435	298704	226863	261044	234213	246502	255206	1.03531	0.0500631	0.642136
ARL4A	40390.4	37923.8	32755.5	37628.9	31752	45362	53282.5	31921.6	37174.6	40579.5	1.09159	0.126433	0.575826
ARL5B	52260	65876.6	39626.7	54475.4	1	45275.7	63228.6	39821.3	53059.7	37081.6	0.698866	-0.516911	0.329436
ARL6	11098.1	12184	12978	14228.2	12326.6	13374.7	12028	13757.7	12622	12871.8	1.01979	0.0282672	0.761155
ARL6IP1	105826	109648	96621.7	99716.4	102145	100987	103676	103717	102953	102631	0.996873	-0.00451768	0.921058
ARL6IP4	965718	934620	823680	888437	419999	789719	941797	996531	903114	787012	0.871442	-0.198523	0.442646
ARL6IP5	268537	215144	195225	250814	77976.3	202138	242719	254125	232430	194240	0.83569	-0.25896	0.430866
ARL6IP6	77241.3	84546.7	115812	102974	1	89962.6	99156.3	94878.8	95143.5	70999.7	0.746238	-0.422293	0.396676
ARL8A	541921	452311	431740	542658	389987	480876	565336	539611	492157	493953	1.00365	0.00525317	0.97186
ARL8B	558167	659921	418708	625855	154726	490789	626096	560669	565663	458070	0.809793	-0.304374	0.407085
ARMC1	206734	224506	179033	237953	232699	199589	229334	239343	212056	225241	1.06218	0.0870222	0.430795
ARMC10	138699	157037	146061	140527	152342	141203	155623	138681	145581	146962	1.00949	0.0136232	0.821076
ARMC5	14732.5	14193.7	13053.6	22975.7	16486.8	18223	16565.1	15105.9	16238.9	16595.2	1.02194	0.0313148	0.88837
ARMC6	193233	194653	192842	207569	182692	189257	215822	194078	197074	195462	0.991819	-0.0118506	0.849214
ARMC8	158418	164094	150061	166820	172960	152182	158750	158690	159848	160646	1.00499	0.00717804	0.894167
ARMCX3	236924	243644	215850	238443	231320	221982	242594	237144	233715	233260	0.998052	-0.00281369	0.95404
ARMCX5	744058	901881	847005	719948	1.10804e+06	634844	851902	720667	803223	828863	1.03192	0.0453333	0.829789
ARMH3	1	19456.7	13208.4	1	23396.1	8147.85	14718.4	25105.4	8166.79	17841.9	2.1847	1.12743	0.176592
ARMT1	127031	116893	122953	123658	117458	113249	128212	126317	122634	121309	0.989198	-0.0156686	0.762412
ARNT	33198.5	34978.7	26801	30773.4	33366.6	34083.5	39334.1	34436.4	31437.9	35305.2	1.12301	0.167376	0.137207
ARPC1A	158164	160195	172366	158305	180097	153497	153686	155612	162258	160723	0.990542	-0.0137098	0.842913
ARPC1B	1.70742e+06	1619411	1.40816e+06	1.74027e+06	1.08968e+06	1612813	1669986	1.69999e+06	1.61881e+06	1.51812e+06	0.937795	-0.0926558	0.564709
ARPC2	1.3066e+06	1.26604e+06	1.21114e+06	1.39528e+06	1.16005e+06	1.25597e+06	1370921	1258088	1.29476e+06	1.26126e+06	0.974121	-0.0378264	0.584702
ARPC3	1.01011e+06	928591	819598	1.12669e+06	874739	937984	1.08863e+06	939810	971249	960291	0.988718	-0.0163692	0.894949
ARPC4	2876994	3.04608e+06	2.95381e+06	2.97164e+06	2.95755e+06	2777535	2843004	2.60018e+06	2.96213e+06	2.79457e+06	0.943432	-0.08401	0.107778
ARPC5	781645	612153	809437	782191	992167	733926	808207	733731	746356	817008	1.09466	0.130485	0.390692
ARPC5L	468505	380487	541911	497398	528037	424896	448061	365393	472075	441597	0.935437	-0.0962877	0.547977
ARPP19	186830	132089	172499	215497	167889	187248	198802	123470	176729	169353	0.958263	-0.0615062	0.768971
ARRB1	449259	481333	441268	481067	445201	452975	467836	472146	463232	459539	0.992029	-0.0115457	0.77538
ARRB2	33375.5	30927.8	33103.3	32387.9	28199.8	27883.5	34359.4	30851.6	32448.6	30323.6	0.934511	-0.0977159	0.257987
ARRDC1	26422.5	27955.6	27705.3	26016.8	24588	26977.9	31485.2	27529.2	27025.1	27645.1	1.02294	0.0327231	0.703781
ARSA	36765.8	41739.6	38835.6	43318.3	37201.5	37111.3	47091.8	42542.7	40164.8	40986.8	1.02047	0.0292274	0.781752
ARSB	35551.8	36959.1	28578.1	36978.2	24897.5	33300	39004.7	39429.9	34516.8	34158	0.989605	-0.015075	0.931037
ARV1	82559.4	67293.7	63391.5	74564.5	88574.3	82104.7	86995.5	117896	71952.3	93892.5	1.30493	0.38397	0.0672953
ARVCF	20156.5	20028.4	19612.3	20346.7	26592.1	10998	12927.6	19314.8	20036	17458.1	0.871338	-0.198696	0.51776
ASAH1	378536	404171	352186	376614	293028	347420	422252	385247	377877	361987	0.957949	-0.0619793	0.620439
ASAP1	52338	57435.7	60070.2	55030.4	68081	54604.8	56361.9	54920.6	56218.6	58492.1	1.04044	0.0571939	0.560456
ASB1	13311.5	12035.7	11220.5	12828.9	10721.7	12577.3	12007.4	17233.9	12349.2	13135.1	1.06364	0.0890107	0.62912
ASB3	10026	10952.2	12408.4	15320.5	17653.2	12275.5	15096.6	14379.9	12176.8	14851.3	1.21964	0.286456	0.146325
ASB6	40437.9	44983	45164.4	45682.3	47640.6	41598.1	44369.7	43895	44066.9	44375.9	1.00701	0.010079	0.865099
ASCC1	149122	151289	128832	152248	161445	137612	151967	137838	145373	147216	1.01268	0.0181762	0.826249
ASCC2	219027	229616	202040	219802	183573	208740	230254	230336	217621	213226	0.979803	-0.0294357	0.741059
ASCC3	185270	182475	174388	184192	175010	179140	184361	162898	181581	175352	0.965694	-0.0503619	0.288361
ASDURF	45004.8	36306.7	41312.2	50300.5	53611.2	33573.3	45615.9	34754	43231.1	41888.6	0.968946	-0.0455115	0.819979
ASF1A	183172	209883	205754	197286	196657	193472	233479	180454	199024	201015	1.01001	0.0143645	0.883202
ASF1B	401250	426329	356789	374250	340499	396567	432201	362373	389655	382910	0.982691	-0.0251898	0.798728
ASH2L	314095	284360	302456	332696	287562	296168	320851	323725	308402	307077	0.995704	-0.00621156	0.925325
ASL	30853.3	24884.1	25191.4	24588.4	27275.4	24648.5	28770.4	24950	26379.3	26411.1	1.0012	0.00173676	0.986497
ASMTL	105425	91195.8	84486.2	99510.8	115963	96791.1	99150.3	103966	95154.5	103968	1.09262	0.127793	0.210047
ASNS	2.32867e+06	2289107	2.12461e+06	2.47828e+06	2122830	2.30958e+06	2.55156e+06	2299087	2.30517e+06	2.32076e+06	1.00677	0.00972871	0.89596
ASNSD1	17692.9	19646	15678	18213.1	17406.8	15219.1	17699.5	15130.2	17807.5	16363.9	0.918932	-0.12197	0.22821
ASPH	26351.2	31158.6	31082.9	32761.6	35806.8	29545	35132.2	35236.4	30338.6	33930.1	1.11838	0.161412	0.125697
ASPM	39328.2	42613	37850	36867.6	46251.2	42556.1	41879.4	38931.5	39164.7	42404.5	1.08272	0.114666	0.150927
ASPSCR1	130445	136571	118697	139355	152834	141794	143849	156326	131267	148701	1.13281	0.179908	0.0253194
ASRGL1	101169	97638.2	81129.9	83188.1	83825.6	83094.1	98284.3	117534	90781.4	95684.5	1.05401	0.0758883	0.628577
ASS1	47410.8	32468.5	46143.6	39709.7	43212.6	41150.8	41215	29870.1	41433.1	38862.1	0.937948	-0.0924203	0.595245
ASXL1	14854.2	16700.1	14778.8	18367.2	19486.7	17014.4	19282.2	19505.6	16175.1	18822.2	1.16365	0.218663	0.0491735
ASXL2	24496.6	24974.4	21591.9	23015.6	30187.7	24664.3	24349.2	24518	23519.6	25929.8	1.10247	0.140744	0.200441
ATAD1	149088	152270	130562	147686	148724	145039	137704	151176	144901	145660	1.00524	0.00753821	0.899174
ATAD2	198913	210817	186768	199159	179142	203089	190325	189912	198914	190617	0.958288	-0.0614693	0.276638
ATAD2B	64370.6	63320.9	53238.6	64644.1	52318.3	58048.1	62518.9	54844.6	61393.6	56932.5	0.927336	-0.108835	0.252699
ATAD3A	2.52857e+06	2486053	2500393	2.72921e+06	2.13688e+06	2398719	2.73614e+06	2.64079e+06	2.56106e+06	2.47813e+06	0.967621	-0.0474861	0.599184
ATAD3B	825572	879196	700499	844393	460186	683967	814351	788794	812415	686825	0.845411	-0.242275	0.228273
ATAD5	53624.1	51297.7	52158.3	51838	51622.8	51251.2	55192.1	50918.9	52229.5	52246.3	1.00032	0.000462355	0.988625
ATE1	20993.3	17302.1	17541	19700.4	23139.4	19220.6	23327.4	20216.2	18884.2	21475.9	1.13724	0.185537	0.107103
ATF2	13207.1	12367.1	4774.11	12922.6	1	12465.6	13251.6	12243.3	10817.7	9490.36	0.877299	-0.18886	0.738244
ATF6	35274.3	30428.3	26672.3	36472.7	24410.6	29047.4	38959.9	33884.2	32211.9	31575.5	0.980244	-0.0287874	0.875046
ATF6B	62777.3	63887	61969.9	65308.4	45380.3	54486.3	55895.7	51298.1	63485.7	51765.1	0.815382	-0.294452	0.0114731
ATF7	13508.6	11639.3	6075.98	14815.6	7022.57	12547.7	15565.4	13861.1	11509.9	12249.2	1.06423	0.0898126	0.791078
ATF7IP	64662.9	58718	58505.6	61472.6	60782.7	65743.1	61408.1	61976.6	60839.8	62477.6	1.02692	0.038325	0.40575
ATG101	104207	125486	114940	126048	133582	98567	113900	114113	117670	115041	0.977652	-0.0326071	0.777056
ATG13	58394.3	58846.8	52341.7	56722.4	48645.6	53271.3	53983.4	58764.4	56576.3	53666.2	0.948562	-0.0761856	0.301071
ATG14	10928.9	16955	16076.3	15553.4	1	13523.5	19079.6	19375.3	14878.4	12994.9	0.873403	-0.195281	0.713476
ATG16L1	131817	125832	118981	123725	122842	116523	134347	124552	125089	124566	0.99582	-0.00604261	0.912609
ATG2A	76858.8	79881.9	83873.1	75267.4	101865	86038.7	85767.8	79657.8	78970.3	88332.3	1.11855	0.161631	0.142079
ATG2B	22671.6	23549.9	17806.7	22784.9	20971.3	22523.1	21474.5	22703.4	21703.3	21918.1	1.0099	0.0142097	0.884446
ATG3	226974	195570	182503	212441	194032	175374	224520	196626	204372	197638	0.967051	-0.0483357	0.648417
ATG4A	70933.3	62329.7	37173	64675.7	62130.9	63101.2	53140.5	91652	58777.9	67506.1	1.1485	0.199745	0.465005
ATG4B	161479	157703	138069	162473	139225	148241	164157	171862	154931	155871	1.00607	0.00872886	0.923468
ATG4C	30820.8	32006.3	27637.9	28869.9	38620.7	26112.2	30730.9	30858.5	29833.7	31580.6	1.05855	0.082092	0.564079
ATG5	77792.5	87385.4	74075.3	79904.8	65802.2	70939.2	83570.9	85336.4	79789.5	76412.2	0.957672	-0.0623968	0.569261
ATG7	190049	179366	146321	172270	165336	165450	169985	169554	172001	167581	0.974302	-0.0375596	0.668977
ATG9A	154116	164088	123516	159548	115740	146219	157415	146924	150317	141574	0.94184	-0.0864456	0.521124
ATIC	3376804	3454965	3.43932e+06	3.60879e+06	3.24369e+06	3.47973e+06	3.4835e+06	3.57534e+06	3.46997e+06	3.44557e+06	0.992968	-0.0101807	0.787925
ATL2	113808	119515	109976	116894	111326	114604	117977	120192	115048	116025	1.00849	0.0121936	0.741596
ATL3	277003	272766	257012	257572	239523	251704	279128	243872	266088	253557	0.952905	-0.0695949	0.278969
ATM	25957.2	23516.7	22005.2	27886.3	26245.9	23379.4	25111.2	25158.6	24841.4	24973.8	1.00533	0.00766884	0.930474
ATOX1	18735.8	8703.19	6219.13	6430.15	1	11588.8	10788.5	14165	10022.1	9135.82	0.91157	-0.133574	0.843767
ATP11A	15717.8	15369	15758.2	15918.1	13402.9	12378.6	17258.7	15187.3	15690.8	14556.9	0.927734	-0.108216	0.368365
ATP11B	32008.8	32554.3	32797.8	33050.9	30260.2	29994.9	34670.7	32465.1	32603	31847.7	0.976835	-0.0338132	0.543031
ATP11C	44905.4	49027.7	44187	43705.4	44227.2	40543.7	46031.4	49396	45456.3	45049.6	0.991051	-0.0129688	0.860889
ATP13A1	178013	180758	176267	192686	172784	183341	184237	185431	181931	181448	0.997347	-0.00383272	0.921972
ATP13A3	32118.2	26396.1	27201.6	40680.6	53452.8	35522.7	33767.6	34591.1	31599.1	39333.6	1.24477	0.315876	0.232663
ATP1A1	1.26732e+06	1.3284e+06	1.27598e+06	1.29098e+06	1.10651e+06	1.16406e+06	1.27886e+06	1.29183e+06	1.29067e+06	1.21032e+06	0.937743	-0.0927353	0.171418
ATP1B3	446118	540733	504338	476392	451427	431710	506754	419696	491895	452397	0.919701	-0.120763	0.206454
ATP23	13163.9	20716.7	17364.9	16017.4	27700	16430.9	22522.4	17118.7	16815.7	20943	1.24544	0.316656	0.23697
ATP2A2	1.57588e+06	1.55196e+06	1.43246e+06	1.5564e+06	1.48041e+06	1.48016e+06	1.46265e+06	1.45644e+06	1.52918e+06	1.46992e+06	0.961246	-0.0570219	0.166402
ATP2A3	155666	176204	161829	148074	136007	156252	180416	156504	160443	157294	0.980375	-0.028595	0.783134
ATP2B1	122456	120273	112685	115688	114989	106276	122511	114871	117776	114662	0.973563	-0.0386531	0.468472
ATP2B4	65088.8	57344.6	60300.4	67896.2	82522.5	65296	64446.3	65137	62657.5	69350.5	1.10682	0.146418	0.242246
ATP2C1	35243.9	28503.2	26588.5	32295.8	42518.2	34812.1	32714.7	35059.3	30657.8	36276.1	1.18326	0.242762	0.100348
ATP5F1A	20994335	20826317	21053431	23051011	20149773	21063603	21469987	21489989	2.14813e+07	21043338	0.979613	-0.029716	0.506867
ATP5F1B	12935463	16431905	14998578	14720220	13502685	13624250	14039722	14003656	1.47715e+07	1.37926e+07	0.933726	-0.0989282	0.267037
ATP5F1C	4.13764e+06	4.14896e+06	4.0035e+06	4.38079e+06	3.74673e+06	3.78883e+06	4.14136e+06	4.17284e+06	4.16773e+06	3.96244e+06	0.950745	-0.0728703	0.191719
ATP5F1D	142667	128313	166897	152077	119433	125512	135136	113478	147488	123390	0.836608	-0.257376	0.0516162
ATP5F1E;ATP5F1EP2	1.96407e+06	774246	924894	1.22481e+06	1.07405e+06	967394	762215	1.22301e+06	1.222e+06	1.00667e+06	0.823784	-0.279661	0.48938
ATP5IF1	110670	81415.3	124873	145461	126057	98916.9	108592	98736.8	115605	108076	0.934871	-0.0971607	0.638218
ATP5ME	1.35806e+06	926892	1.28851e+06	1.15006e+06	1.01465e+06	1.11592e+06	1.27506e+06	1.18107e+06	1.18088e+06	1.14668e+06	0.971035	-0.0424055	0.768343
ATP5MF	1.30363e+06	1.33204e+06	1162900	1.40465e+06	909258	1225647	1.23919e+06	1.21353e+06	1.3008e+06	1.14691e+06	0.88169	-0.181656	0.162045
ATP5MG	3.18874e+06	2821263	3.02695e+06	3.15431e+06	2.66707e+06	2.87822e+06	3.02551e+06	3094441	3.04782e+06	2.91631e+06	0.956852	-0.0636323	0.337083
ATP5MJ	678220	557986	491749	645796	87302.1	705216	813302	363407	593438	492307	0.829584	-0.269539	0.591206
ATP5MK	1.03618e+06	793810	1.05167e+06	1.03139e+06	1.00244e+06	989651	1.03722e+06	1.01973e+06	978263	1.01226e+06	1.03475	0.0492869	0.622414
ATP5PB	1.95615e+06	1.98812e+06	1.92688e+06	2.2213e+06	1.74952e+06	1.82518e+06	2122799	2.0327e+06	2.02311e+06	1.93255e+06	0.955235	-0.0660721	0.44421
ATP5PD	47177.6	39115.5	39161.2	45925.7	19428.7	36816.6	48243.8	43738.3	42845	37056.9	0.864905	-0.209386	0.439303
ATP5PF	8825.94	41028.7	1	32651.8	1	31370.3	39597.8	39056	20626.9	27506.3	1.33352	0.415236	0.627755
ATP5PO	4.65653e+06	4.50688e+06	4468468	4.622e+06	4.30741e+06	4.31257e+06	4509588	4278638	4.56347e+06	4.35205e+06	0.953671	-0.0684361	0.0235898
ATP6AP1	198179	251419	246643	202191	248013	194111	228866	181478	224608	213117	0.948839	-0.0757655	0.602134
ATP6AP2	130664	137265	132189	159679	132707	125360	136890	133791	139949	132187	0.944533	-0.0823271	0.342349
ATP6V0A1	404330	420206	362563	441825	306784	374212	429185	391592	407231	375443	0.921941	-0.117254	0.344936
ATP6V0A2	45663.8	43940.3	45444.5	47326.1	46896.2	47004.2	43006.2	44759.9	45593.7	45416.6	0.996117	-0.00561285	0.886129
ATP6V0C	206020	694669	977904	136067	69297.1	225733	224762	135054	503665	163712	0.325041	-1.62131	0.189131
ATP6V0D1	769616	818436	723459	794363	668767	672154	743393	773417	776469	714433	0.920105	-0.120129	0.112834
ATP6V0D2	49003.7	31435.6	35454.2	62245.2	1	35390	49954.8	51526.3	44534.7	34218	0.768345	-0.380173	0.491393
ATP6V1A	1.02568e+06	1.01608e+06	930726	1138662	957684	982137	1104526	1.08401e+06	1.02779e+06	1.03209e+06	1.00419	0.00602649	0.941471
ATP6V1B2	1.05339e+06	975625	851747	1.02326e+06	887774	963268	1.01298e+06	1.03046e+06	976007	973620	0.997555	-0.0035323	0.966757
ATP6V1C1	249307	287442	276031	249093	274659	249395	271407	237139	265468	258150	0.972433	-0.0403295	0.599385
ATP6V1D	266367	304363	285908	300704	283119	242803	288058	277079	289336	272765	0.942728	-0.0850869	0.263389
ATP6V1E1	383544	396862	473802	387081	430858	380080	416788	291149	410322	379719	0.925416	-0.111825	0.454993
ATP6V1F	26276.9	39753.8	48716	25938.3	32283	1	40631.2	1	35171.2	18229	0.518294	-0.948157	0.223624
ATP6V1G1	364444	154453	142501	199275	238275	270539	207610	222048	215168	234618	1.09039	0.124849	0.735165
ATP6V1G2	210508	192475	250982	226835	275715	196587	257951	188931	220200	229796	1.04358	0.0615374	0.71811
ATP6V1H	688160	737451	655845	742040	701433	675558	691352	716184	705874	696132	0.986198	-0.020051	0.685505
ATP7A	100557	96067.3	89392.7	102502	89382.4	86805.9	104934	101469	97129.6	95647.9	0.984746	-0.0221771	0.791281
ATP7B	43405.4	29695.8	45020.7	48641.9	98302.8	29887.2	50012.9	34584.8	41691	53196.9	1.27598	0.351608	0.522421
ATP8B4	1	1	15304.4	23612.4	1	1	1	1963.55	9729.7	491.637	0.0505295	-4.30673	0.213418
ATP9B	12529.1	20233.6	13214.7	15241.8	10260	10632.2	13615.6	13637	15304.8	12036.2	0.786433	-0.346604	0.163559
ATPAF1	44682.8	39896.7	33392.7	41271.5	32193.9	38632.7	44203.9	40763.8	39810.9	38948.6	0.978339	-0.0315937	0.811559
ATPAF2	56756.5	58721.9	46378.6	44318.4	50092.4	46528.8	53692.3	46655.5	51543.9	49242.2	0.955346	-0.065904	0.59423
ATR	32089.6	34205.7	27009.4	32413.9	34578.5	31234.5	33957.3	27862.4	31429.6	31908.2	1.01523	0.0218005	0.833202
ATRIP	105537	115906	118184	120893	114538	102544	129752	122530	115130	117341	1.01921	0.0274449	0.756237
ATRN	22451.2	18131	16876.6	17617.3	21968.1	17445.7	17480.6	20099.1	18769	19248.4	1.02554	0.036384	0.783587
ATRX	42868	43293.1	42350.8	45969.2	43488.5	42767.4	46281.3	45321.4	43620.3	44464.7	1.01936	0.0276609	0.48783
ATXN10	373344	368729	297747	351878	339494	357100	352532	321709	347925	342709	0.985009	-0.0217916	0.797459
ATXN2	615167	623474	556791	618494	596514	603750	656555	635258	603482	623019	1.03238	0.0459677	0.388419
ATXN2L	947271	868041	867173	925587	854424	907224	1.00783e+06	851642	902018	905281	1.00362	0.00520938	0.940977
ATXN3	35022.3	32334.4	28187.9	37500.3	50125.8	24490.3	39316.7	30003.9	33261.2	35984.2	1.08187	0.113521	0.673144
ATXN7L2	9779.91	15205.4	13007.2	1	15212.5	15054.7	1	16265.6	9498.39	11633.5	1.22478	0.292526	0.692337
ATXN7L3B	341709	584737	441942	293507	312037	410600	418780	387444	415474	382215	0.919951	-0.120371	0.654966
AUH	111538	98461.4	96939.4	113689	104459	106572	109612	115213	105157	108964	1.0362	0.0513065	0.47752
AUP1	508806	501420	462543	542688	457683	471245	521096	512810	503864	490709	0.973891	-0.0381682	0.581689
AURKA	101063	96881.4	99443.6	102529	105458	102943	99748.7	104049	99979.2	103050	1.03071	0.04364	0.123462
AURKB	262276	248833	230601	290371	254195	257104	286421	270162	258020	266970	1.03469	0.0491968	0.566953
AVEN	9945.27	10138.1	6280.9	9053.91	9058.88	8241.21	7755.38	6304.11	8854.56	7839.89	0.885408	-0.175586	0.381687
AVL9	146440	156737	146815	144028	160781	142042	147047	143640	148505	148378	0.999142	-0.00123776	0.98104
AXL	4212.11	2510.28	1	9621.35	1	5204.9	8617.13	1	4086.18	3456.01	0.845779	-0.241648	0.837133
B2M	42281.7	35144.1	27406.6	50109	27866	35608.6	44266.4	42630.5	38735.3	37592.9	0.970506	-0.0431915	0.858787
B3GALT6	43684.3	40444.2	41835.4	33856.3	42206.7	36771.5	46510.6	35555.8	39955.1	40261.2	1.00766	0.0110107	0.929561
B3GAT3	51769.5	54176.4	63974.1	58472.1	49804.6	58423.8	63164.2	59153.3	57098	57636.5	1.00943	0.0135408	0.894258
B3GLCT	1	1	1	1	7297.54	2739.25	1	1	1	2509.7	2509.7	11.2933	0.241096
B3GNT2	31490	32487.3	27369.3	34914.4	25642.9	25260.1	36717.3	34899.5	31565.2	30629.9	0.97037	-0.0433939	0.795335
B3GNTL1	19429.6	41385.6	21562.4	24407.5	31065.4	34081.3	31841.1	14600.8	26696.3	27897.1	1.04498	0.0634803	0.863985
B4GALT1	46931.8	55810.9	53777.8	50949	48973.7	46996.4	49151.2	51851.3	51867.4	49243.2	0.949405	-0.0749041	0.28553
B4GALT3	16997.7	1	11093.9	21218.9	1	12916.7	1	15199.4	12327.9	7029.51	0.570213	-0.810428	0.422811
B4GALT7	22602.8	24786.9	24075.8	1	19367.8	21342.5	25533	24717.9	17866.6	22740.3	1.27278	0.347984	0.480051
B4GAT1	21953.3	30638.4	26752.6	25262.3	34528.2	1	1	32542.7	26151.7	16768.2	0.641191	-0.641174	0.407125
BABAM1	44504.1	52162.9	47603.2	34268.7	42655.8	40030.8	41518.9	35658.7	44634.7	39966	0.895402	-0.159392	0.318508
BABAM2	195865	153676	140467	188531	164047	186335	153836	196129	169635	175087	1.03214	0.0456384	0.754274
BACH1	10064.9	8054.28	5568.28	6329.51	9964.46	9007.58	6600.65	9974.45	7504.24	8886.78	1.18424	0.243956	0.322587
BAG1	40491.4	41413.1	37607.6	44696.9	46010.8	46719.3	44554	40624.5	41052.2	44477.1	1.08343	0.115603	0.137296
BAG2	68606.6	48548.2	64501.2	63797	75822.1	67993.3	67445.9	58701.6	61363.2	67490.7	1.09986	0.137315	0.319652
BAG3	42927.2	47437.4	36721.8	45676.6	47210.3	45136.6	54035	44645.9	43190.7	47757	1.10572	0.144989	0.203022
BAG4	16344	14035.7	10618.7	11464.6	1	12141.9	20842.8	17089.3	13115.8	12518.8	0.954482	-0.0672106	0.90628
BAG5	55820.2	60962.1	54708.9	66800.8	65160.5	60406.1	63222.8	60847.8	59573	62409.3	1.04761	0.0671024	0.396
BAG6	338526	393886	353046	379234	326338	347514	395559	388078	366173	364372	0.995081	-0.00711384	0.933687
BAHCC1	24753.7	37190	21175.8	32973	21329.7	19295.2	32845.3	39061.8	29023.1	28133	0.96933	-0.0449408	0.886695
BAIAP2	114015	114006	103328	108734	95429.5	98048.1	114805	107887	110021	104042	0.945663	-0.0806021	0.301049
BAIAP2L1	170657	99803.3	95442.8	154276	90157.2	120521	140596	145128	130045	124101	0.954294	-0.0674949	0.804205
BANF1	119326	128306	98540.7	87996.1	57916.5	71097.5	102333	117429	108542	87193.9	0.803318	-0.315957	0.250962
BANP	28694.9	21699.2	19635.6	29605.5	23920.7	22009.1	30370.5	25444.9	24908.8	25436.3	1.02118	0.0302325	0.869669
BAP1	60261.5	66575.4	72213.3	71584.5	70747.5	63452.7	65548.8	69458.7	67658.7	67301.9	0.994727	-0.00762736	0.916792
BAP18	1161.84	1	1	1	1	1	1	55849.3	291.21	13963.1	47.9485	5.58341	0.399719
BARD1	30454.2	34869.4	27465.9	26021.4	26180.9	26301.6	27865.4	28589.4	29702.8	27234.3	0.916896	-0.12517	0.301053
BASP1	1	1	1	3430.1	1	1	1	9438.55	858.274	2360.39	2.75016	1.45951	0.583599
BAX	78287	120441	92697.7	115668	76634.6	76387.2	92524.9	128041	101773	93397.1	0.917697	-0.123911	0.612956
BAZ1A	147654	141182	146993	145434	147194	144746	149611	147290	145316	147210	1.01303	0.0186839	0.328661
BAZ1B	565822	504928	481455	552755	464444	516313	559597	556723	526240	524269	0.996255	-0.00541309	0.949487
BAZ2A	193006	170433	152417	179567	162601	190419	180325	180072	173856	178354	1.02587	0.0368529	0.679387
BBX	14481.7	14334.4	15718.2	11676	12906	7430.07	12595.3	12735.2	14052.6	11416.6	0.812422	-0.299699	0.15477
BCAP29	18797.7	19402.2	14444.2	16259.6	16406.3	16051	17112.6	16522.1	17225.9	16523	0.959193	-0.0601066	0.588026
BCAP31	724224	636290	734906	694740	727264	644690	701826	567445	697540	660306	0.946621	-0.079141	0.413386
BCAR1	33009.3	30500.2	32453.2	34236.3	30996.3	29163.2	33594.6	29652.4	32549.7	30851.6	0.94783	-0.0773	0.229568
BCAS2	122975	133091	98745.7	117669	92281.9	106291	118495	130544	118120	111903	0.947366	-0.0780069	0.590086
BCAS3	9867.02	6769.2	11426.3	7051.94	11973.3	5655.19	10302.6	6749.32	8778.63	8670.1	0.987637	-0.0179472	0.955526
BCAT1	694942	612933	586289	614722	461749	680285	645914	708439	627222	624097	0.995018	-0.00720546	0.961175
BCAT2	152286	139947	105298	157047	114360	146797	147365	158193	138644	141679	1.02189	0.031233	0.847099
BCCIP	314174	309463	272891	281066	302021	296677	291370	301511	294398	297895	1.01188	0.0170322	0.759734
BCKDHA	48005.3	47316.6	40726.3	47865.8	56896.3	43316.6	56986.7	52433.7	45978.5	52408.3	1.13984	0.188835	0.143782
BCKDHB	61928.3	63659.1	51254.3	69158.6	50772.8	62176	52299.8	67311.7	61500.1	58140.1	0.945366	-0.081055	0.560722
BCKDK	58154.6	49776.2	45297.3	60105.1	58702.2	48093.1	56669.4	59617.3	53333.3	55770.5	1.0457	0.0644659	0.598934
BCL10	124783	96502	99837.5	94851.5	114096	106070	104864	89733.1	103993	103691	0.99709	-0.0042042	0.973354
BCL2L1	114390	207900	268885	54453	210337	137018	285814	60954.9	161407	173531	1.07511	0.104488	0.864174
BCL2L13	263912	315913	251764	262733	269948	255975	325990	281462	273580	283344	1.03569	0.0505877	0.656571
BCL7B	102152	83782	95723.1	72469.2	74362.8	117062	89039.4	77266	88531.6	89432.5	1.01018	0.0146073	0.941708
BCL7C	91212.2	68128.8	73937.1	100508	85489.7	82419.5	109569	71155.4	83446.4	87158.5	1.04448	0.0627908	0.74799
BCLAF1	637370	595878	589882	733281	620151	610989	814985	602579	639103	662176	1.0361	0.0511663	0.719761
BCOR	14810.5	15521.1	15081.7	17583.8	16172.5	16062.4	17622.9	17796.7	15749.3	16913.6	1.07393	0.1029	0.190454
BCORL1	99453.4	87848.2	89834.9	89152.8	90612.6	90790.1	92324.7	94539.4	91572.3	92066.7	1.0054	0.00776763	0.869588
BCR	139288	140593	141245	156196	134586	128490	146165	150302	144330	139886	0.969204	-0.0451276	0.516386
BCS1L	194000	201632	193396	197745	178583	188487	202554	189746	196693	189842	0.965171	-0.0511442	0.265773
BDH1	71947	48020.5	14237.3	74668.7	1	72160.2	1	39633	52218.4	27948.8	0.535229	-0.901772	0.321534
BDH2	80836.5	71957.6	75735.8	74197.8	57985.1	71023.4	81257.6	82935.7	75681.9	73300.5	0.968533	-0.0461268	0.715605
BDP1	12812.6	11294.9	9679.12	12737.6	11342.8	11509.4	14362.6	13616.1	11631.1	12707.7	1.09257	0.127722	0.34771
BECN1	41154.8	41374.5	36395.7	45992.4	54682.5	46168.7	49541.5	51873	41229.3	50566.4	1.22647	0.294508	0.0128782
BEND3	25794.5	28863.9	21635.2	22677.1	29379.9	25736.1	28157.5	28066.9	24742.7	27835.1	1.12498	0.169904	0.157143
BET1	68383.2	71375.6	89761.8	56098.5	79260.3	72380	85909.5	63273.2	71404.8	75205.7	1.05323	0.074822	0.671344
BET1L	32925.7	34967.5	1	37665.7	1	30639.6	42099.9	34929	26390	26917.4	1.01998	0.0285471	0.968529
BICD2	62233	64533.7	67964.1	71309.1	63907	63249.2	75358.5	56709.8	66510	64806.1	0.974382	-0.03744	0.713482
BICRA	8925.72	10392	1	10192.3	1	9374.93	12123.2	8814.43	7377.75	7578.4	1.0272	0.0387117	0.957522
BID	83469.1	85505.9	84634.1	71570.7	90934.6	74220.9	83389.9	73190.1	81294.9	80433.9	0.989408	-0.015362	0.876789
BIRC2	29003.5	22794.5	31586.9	33058.9	38454.5	29513.4	37164.5	28825.4	29110.9	33489.4	1.15041	0.202146	0.243641
BIRC5	17044.4	15996.9	9021.48	18541.7	17154.2	11969	19887.9	25994.4	15151.1	18751.4	1.23762	0.307571	0.359731
BIRC6	306867	293301	286667	299136	294834	309588	300388	300412	296493	301305	1.01623	0.0232297	0.400057
BLM	95991.3	80714.5	76340.4	87875.8	92356.1	91662.3	90567.4	88755	85230.5	90835.2	1.06576	0.0918819	0.285069
BLMH	648611	612211	536700	623942	509051	628964	619168	627485	605366	596167	0.984805	-0.0220906	0.816141
BLOC1S1	42987.8	56132.5	38494.5	40328.9	51530.9	25732.7	37081.8	51821.6	44485.9	41541.7	0.933818	-0.0987874	0.708825
BLOC1S3	51900.4	48218.7	54110.6	49107.5	51606.9	48006.5	54648.3	41935.6	50834.3	49049.3	0.964887	-0.0515685	0.586703
BLOC1S4	12145.3	15731.5	11691.7	16615.5	1	8285.21	17266.1	21862.6	14046	11853.7	0.843922	-0.244818	0.688116
BLOC1S5	41795.3	32749.4	42875.5	37677.3	42993.4	34496.7	29068.5	48514.4	38774.4	38768.2	0.999842	-0.000227786	0.999057
BLOC1S6	41089.8	21291.4	29789	36282.6	36726.7	34905.5	38014.8	29186.3	32113.2	34708.3	1.08081	0.112115	0.609596
BLTP2	26004.2	20285.7	22289.7	24775.2	22924.9	23829.4	22850.5	25331.2	23338.7	23734	1.01694	0.0242309	0.791398
BLTP3A	61598	55338.8	52636.4	62783.2	54263.8	57565.7	61647.1	64469.9	58089.1	59486.6	1.02406	0.0342976	0.688388
BLTP3B	12125.6	13650.2	9981.5	12118.6	9513.73	13133.8	12933.6	13834.6	11969	12353.9	1.03216	0.0456691	0.764707
BLVRA	1.56691e+06	1.50975e+06	1.28012e+06	1.65232e+06	1360854	1.5147e+06	1568652	1.52297e+06	1.50227e+06	1.49179e+06	0.993024	-0.0100992	0.913575
BLVRB	3.08976e+06	3.33138e+06	2.99519e+06	3.18122e+06	2.54773e+06	3.19378e+06	3.17892e+06	3.3168e+06	3149388	3.05931e+06	0.971398	-0.0418656	0.656052
BMI1	31923.9	36043.2	32239.1	27533.9	32973.4	34710.2	31681	31249.9	31935.1	32653.6	1.0225	0.0321026	0.724635
BMP2K	71225.5	68413.8	65230.4	75351.6	64002.2	72738.8	71445.7	73363.9	70055.3	70387.6	1.00474	0.00682739	0.916807
BMS1	159011	153206	153877	160978	181001	151221	158819	170340	156768	165345	1.05471	0.0768523	0.284871
BMX	7668.13	1	9429.06	16620.6	1	15068.3	24591.3	18521.2	8429.69	14545.4	1.7255	0.787016	0.371197
BNIP1	198899	190734	176306	221182	224547	189752	211683	186330	196780	203078	1.032	0.0454474	0.646919
BNIP2	35352.4	46346.7	29234.9	45161.6	6112.42	29856.4	37907.1	31377.9	39023.9	26313.5	0.674291	-0.568557	0.177792
BOD1L1	69329.6	70718.2	66384.6	62810.3	70101.2	65721.1	66827	78592.1	67310.7	70310.3	1.04456	0.0629013	0.418519
BOLA2B	239452	248453	251160	260974	231576	237672	274340	249651	250010	248310	0.993199	-0.00984526	0.878069
BOLA3	65779.3	23539	53236	40822.4	29957.3	42562	52044.1	35951.9	45844.2	40128.8	0.875331	-0.192099	0.601089
BOP1	526111	475065	451990	508664	450488	485132	470499	485994	490458	473028	0.964463	-0.0522019	0.396983
BORCS6	7593.9	7236.13	6378.11	9505.31	6539.18	5080.5	9595.11	7210.04	7678.36	7106.21	0.925485	-0.111719	0.63841
BPGM	141454	146863	119098	148350	134988	127991	162153	160310	138941	146360	1.0534	0.0750493	0.527978
BPHL	28869.9	23213.6	20863.9	30405.7	26155.1	26946.5	28785.6	27343.3	25838.3	27307.6	1.05687	0.079792	0.569195
BPNT1	627953	646410	571585	645069	529473	647706	601505	688360	622754	616761	0.990376	-0.013952	0.882558
BPNT2	43937	59774.5	51098.2	37073.3	54786.5	41734.1	39493.6	54452.3	47970.8	47616.6	0.992618	-0.0106901	0.957346
BPTF	85011.6	80676.6	79960.8	90272	80883.1	84811.7	87759.3	84507	83980.3	84490.3	1.00607	0.00873505	0.860915
BRAF	6742.48	4716.83	6134.1	6361.31	6050.25	5715.19	6197.05	6648.51	5988.68	6152.75	1.0274	0.0389935	0.750575
BRAP	92538.8	88103.5	70819.3	86221.9	109256	82970.7	83888.3	88924.7	84420.9	91259.9	1.08101	0.112381	0.413414
BRAT1	225449	205752	185303	217320	213869	233021	222449	244631	208456	228493	1.09612	0.132403	0.120745
BRCA1	27477.9	32125.1	21643.5	29359.8	31875	25046.8	30574.5	27485.4	27651.6	28745.4	1.03956	0.0559715	0.701067
BRCA2	17012.7	15262.4	13554.9	18817.5	18846.7	20964.1	19656.3	19391.3	16161.9	19714.6	1.21982	0.286669	0.0444391
BRCC3	133943	125454	106758	132572	133150	115883	124494	130056	124682	125896	1.00974	0.0139797	0.874758
BRD1	54271.8	52391.1	49467.4	60124.6	54589.8	50084.5	57338.2	53073.2	54063.7	53771.4	0.994593	-0.00782144	0.918124
BRD2	90158.7	100475	89485.5	96845.8	86128.6	88097.6	92232.1	87136.8	94241.2	88398.8	0.938005	-0.0923319	0.114452
BRD3	79511.2	92450.8	80811.8	80078.8	68647.4	68669.2	83984	85185.8	83213.1	76621.6	0.920787	-0.11906	0.285569
BRD4	502800	515371	429437	485649	426736	446995	528740	501413	483314	475971	0.984806	-0.0220889	0.816887
BRD7	100380	102122	92034.7	94589	96468.6	99289	98370.6	114755	97281.3	102221	1.05078	0.0714546	0.357031
BRD8	33604.4	27985.1	27935.3	31237.3	41582.4	32570.6	36633.7	27132.8	30190.5	34479.8	1.14207	0.191656	0.268243
BRD9	25455.6	29005.3	28339.6	27090.5	23335.6	24320.7	27680.4	28900.5	27472.8	26059.3	0.94855	-0.0762038	0.401994
BRF1	18544.6	17634.8	16628	20702.4	16888.5	15817.7	21731.2	24368.5	18377.5	19701.5	1.07205	0.100367	0.578754
BRF2	17555.5	14956.9	10343.5	15521.3	13338.8	11173.6	22728.9	14398.5	14594.3	15409.9	1.05589	0.0784586	0.793619
BRI3BP	148972	177939	138340	136720	176942	142283	150522	122113	150493	147965	0.983201	-0.0244423	0.870414
BRIP1	48778.6	46952.7	31082.7	38865	14492.5	34911.4	48496.7	40037	41419.7	34484.4	0.832559	-0.264376	0.443196
BRIX1	428068	396118	357954	406963	363237	383613	410876	371333	397276	382265	0.962215	-0.0555685	0.439778
BRMS1	38573.6	37503.6	38108.6	38993.6	39364.3	40378.8	41229.6	43718.4	38294.8	41172.8	1.07515	0.10454	0.0473263
BROX	560656	524514	532843	607218	474093	539275	586056	573500	556308	543231	0.976493	-0.0343179	0.691332
BRPF1	92419.8	77212.5	86136.8	95193.2	87675.9	76846.7	91096.6	88781.8	87740.6	86100.2	0.981305	-0.027227	0.758809
BRPF3	21240.4	24360.4	15164.5	22909.6	17919.2	23144.1	24571	23886.7	20918.7	22380.2	1.06987	0.0974298	0.585533
BRWD3	11812.3	18493.1	15406.4	22527.5	8627.52	16332.9	26139.4	24012.2	17059.8	18778	1.10072	0.138441	0.724218
BSDC1	75485.9	61329.6	70270.1	68375.7	63503.7	70270.6	86541.4	63251.1	68865.3	70891.7	1.02942	0.0418386	0.758117
BSG	1.59436e+06	1772679	1.56146e+06	1.58532e+06	1.54502e+06	1.43837e+06	1.74793e+06	1.33674e+06	1.62846e+06	1.51701e+06	0.931565	-0.102272	0.321053
BST2	21598.8	28154.7	28508.5	21163.6	27240.9	17941.5	25099.9	24022.3	24856.4	23576.1	0.948494	-0.076289	0.666984
BTAF1	112361	120653	113730	125653	124231	119258	120571	126475	118099	122634	1.0384	0.0543575	0.258693
BTBD1	15274.8	32478.3	29413.3	20484.7	23897.5	17335.7	32811.8	15284.2	24412.8	22332.3	0.914779	-0.128505	0.722875
BTBD2	12771.3	17087.2	12876	20417.9	1	14268.3	20696.7	17190.8	15788.1	13039.2	0.825888	-0.275981	0.604991
BTBD9	17443.1	18930.8	15870.7	16971.4	22144.2	15249	18129.7	14931.5	17304	17613.6	1.01789	0.0255838	0.871335
BTF3	1.12926e+06	1.24992e+06	970415	1.24629e+06	971896	1.083e+06	1.01612e+06	1.32425e+06	1.14897e+06	1.09882e+06	0.956348	-0.0643923	0.642345
BTF3L4	753910	984037	852112	826095	852345	793627	792831	789717	854039	807130	0.945074	-0.0815002	0.410035
BTK	747899	739254	707032	741829	695972	725713	734144	756971	734004	728200	0.992093	-0.0114521	0.723703
BTN2A1	8895.98	8505.31	9790.5	9227.33	7914.34	8920.64	14090.7	6417.93	9104.78	9335.9	1.02538	0.0361653	0.899374
BTRC	42634.8	35592.6	42702.5	46448.5	50860.4	39843.3	36861.5	41770.9	41844.6	42334	1.0117	0.016777	0.901338
BUB1	217268	234124	202661	236137	231896	217869	235755	239461	222548	231245	1.03908	0.0553082	0.387219
BUB1B	115627	116545	115549	117172	117821	109263	117833	121245	116223	116540	1.00273	0.00393029	0.909837
BUB3	2.30069e+06	2206583	2.00165e+06	2.46792e+06	1.08007e+06	2.13158e+06	2.34773e+06	2.43636e+06	2.24421e+06	1.99893e+06	0.890707	-0.166977	0.500358
BUD13	157484	167537	114837	150217	149466	148243	152819	160208	147519	152684	1.03502	0.0496524	0.687681
BUD23	277818	238500	280093	262107	213044	231333	265876	264389	264630	243661	0.920761	-0.119101	0.244681
BUD31	338480	310229	255291	334390	347309	308767	310823	366488	309598	333347	1.07671	0.106631	0.360205
BYSL	950985	880829	775866	985864	841076	894641	1.03891e+06	1004864	898386	944873	1.05174	0.0727846	0.504488
BZW1	1.57519e+06	1.47313e+06	1.41531e+06	1.3585e+06	1.2587e+06	1.32783e+06	1.34972e+06	1296989	1.45553e+06	1.30831e+06	0.898855	-0.153839	0.0421442
BZW2	2.16817e+06	2.19342e+06	2088949	1.80498e+06	2.03308e+06	1.87089e+06	1.82943e+06	1.67865e+06	2.06388e+06	1.85301e+06	0.897829	-0.155487	0.118636
C11orf54	198976	161566	129473	152216	170867	169764	156841	186458	160557	170982	1.06493	0.0907587	0.542552
C11orf68	214590	221387	195419	224558	186691	212041	211961	192552	213989	200811	0.93842	-0.0916948	0.204713
C11orf98	766972	476233	515518	711831	250012	496750	608821	603757	617638	489835	0.793077	-0.334467	0.292108
C12orf29	83951.5	78574.1	72152.6	78749.2	74663.2	74272.6	72091.2	85470.7	78356.8	76624.4	0.977891	-0.0322546	0.669495
C12orf4	11911.1	11729.1	14403.9	11948.9	8316.04	11311.6	12840.1	7328.75	12498.3	9949.12	0.796038	-0.32909	0.143247
C15orf39	29187.2	26500.7	17639.7	26925.6	24350.2	26809.3	28421.3	26559.5	25063.3	26535.1	1.05872	0.0823224	0.614553
C15orf40	29704.5	89265.2	96262.2	32263.9	79847	69491.8	89323.5	26380.5	61874	66260.7	1.0709	0.0988209	0.853266
C16orf87	12724.3	12104.8	11038.9	9536.24	8949.65	11727.8	14939.1	16899.3	11351.1	13129	1.15663	0.209925	0.400564
C17orf75	81455.8	85474.5	66885.4	90972	59116.3	65707.5	82285.7	75258	81196.9	70591.9	0.869391	-0.201922	0.194484
C17orf80	25795.3	23483.5	21210.9	21204.4	23780	20805.8	24683.6	19843.2	22923.5	22278.1	0.971846	-0.0412009	0.70009
C18orf21	130128	93595.1	99439.7	91510.6	99537.8	81572	89759.9	88967.2	103668	89959.2	0.867759	-0.204633	0.230944
C18orf25	20199.1	22146	22669.2	31511.7	19438	20348.8	27716.5	19796.3	24131.5	21824.9	0.904414	-0.144945	0.499336
C19orf47	82433.6	94875	79333.4	96999.7	93618.5	92195.4	104891	97280.4	88410.4	96996.3	1.09711	0.133713	0.161389
C19orf53	170711	140992	115948	140219	108511	95483.3	107589	131127	141968	110678	0.779598	-0.359197	0.0653923
C1D	287621	134049	215826	235929	204256	219518	232268	185282	218356	210331	0.963246	-0.0540243	0.823579
C1GALT1	38958.9	44275.3	37319.5	38347.7	41678	34469.1	46744.4	38128.2	39725.4	40254.9	1.01333	0.019105	0.868826
C1GALT1C1	6296.64	7561.41	7907.5	3800.31	6203.85	4665.09	6901.97	7704.58	6391.46	6368.87	0.996465	-0.00510825	0.984808
C1orf112	24529.7	23539.5	20850.5	26241.8	34327.6	24058.4	24489.6	25339.3	23790.4	27053.7	1.13717	0.185449	0.288063
C1orf122	84391.8	74024	77530.8	76392.4	82318.1	86598.5	86631.8	85257.4	78084.8	85201.4	1.09114	0.125837	0.0412522
C1orf131	61442	63950.1	54297.7	66117.7	65895.7	55874	53439.8	70390	61451.9	61399.9	0.999153	-0.00122198	0.991728
C1orf159	28702.6	55368.8	35296.6	51406.3	1	1	62394.9	42550.9	42693.6	26236.9	0.614541	-0.702419	0.386394
C1orf174	32433	42753	32901.5	35706.2	46344.9	33617.2	32822.1	34577.5	35948.4	36840.4	1.02481	0.0353615	0.830641
C1orf52	42836.7	63986.8	46690.8	36783.1	39257.4	32401.9	60799	58406.2	47574.3	47716.1	1.00298	0.0042926	0.988133
C1QBP	618123	663234	675567	546521	671116	593040	635241	429163	625861	582140	0.930142	-0.104477	0.507162
C20orf27	378528	459190	368092	495402	360174	375765	496870	445150	425303	419490	0.986331	-0.0198558	0.899992
C2CD2	33333.6	64763.6	53586.1	65139.1	66047.5	51832.7	68687.9	54965.2	54205.6	60383.3	1.11397	0.155709	0.502923
C2CD2L	24399.7	28249.4	27926.8	31572.9	31245.5	26730.3	31127.8	29345.1	28037.2	29612.2	1.05618	0.0788498	0.419872
C2CD3	1	3900.82	3861.82	3383.6	1	2548.01	1	1	2786.81	637.753	0.228847	-2.12754	0.112962
C2CD5	23095.1	19763.6	18674	23466.8	30255.2	22052.8	23795.6	20286.6	21249.9	24097.6	1.13401	0.181434	0.306534
C2orf49	139874	120436	135099	141255	108577	127564	128608	129860	134166	123652	0.921638	-0.117728	0.180708
C2orf69	32935.7	29937.4	28468.2	33601.3	33156	28549.6	35095.2	32623	31235.7	32355.9	1.03587	0.0508368	0.564824
C2orf76	43943.9	56273.4	48865.4	60610.9	48007.5	42371.2	55053.7	47206.7	52423.4	48159.8	0.918669	-0.122382	0.388832
C3	10440.2	1	1	1	1	1	18175	1	2610.79	4544.5	1.74066	0.799636	0.727853
C3orf38	29725.8	27628.8	23739.4	29950.8	24606.3	25133.1	29719.3	31333.6	27761.2	27698.1	0.997727	-0.0032832	0.978105
C4A	39876.7	27586.9	25064	38806.9	20784.3	26342.7	44605.1	34439.6	32833.6	31542.9	0.960689	-0.0578583	0.847942
C4orf33	17662.5	33548.3	30065	33449.4	15958.1	22476.7	43059.5	32919.4	28681.3	28603.4	0.997285	-0.00392219	0.991598
C5orf22	78078.1	94838.1	86721.8	83406.6	85695.7	68932.6	94383.6	85380.9	85761.2	83598.2	0.974779	-0.0368526	0.747468
C5orf24	28324.1	23575.8	29009.8	27131.5	19610.6	30200	27402.6	30561.9	27010.3	26943.8	0.997536	-0.00355986	0.982206
C6orf120	44239.6	41605.8	1	51798.5	1	32962.5	43409.6	53917.2	34411.2	32572.6	0.946568	-0.0792221	0.91493
C6orf89	39918.1	31179.1	32478.2	42889.2	81001.6	34438.8	48555.6	42537.4	36616.2	51633.4	1.41013	0.495823	0.239781
C7orf50	295625	316960	260044	299452	284322	289771	294773	325509	293020	298594	1.01902	0.0271829	0.725183
C8orf33	153980	178484	160271	164253	142730	163289	168889	183679	164247	164647	1.00243	0.00350517	0.96951
C8orf82	213953	175685	127676	183918	146821	193866	182835	221439	175308	186240	1.06236	0.087276	0.660213
C9orf64	235890	214887	207597	209418	197422	213818	222391	218150	216948	212945	0.981549	-0.0268674	0.654486
C9orf72	10620.2	12861.7	10984.1	12639	8538.49	12633.7	12015.1	7789.6	11776.2	10244.2	0.869905	-0.20107	0.314352
C9orf78	251981	211457	223146	228064	217895	220350	243095	211220	228662	223140	0.975851	-0.0352676	0.633599
CA1	44040.5	64158.9	60684.1	51354.3	48538.6	42511.6	53503.9	48507.7	55059.5	48265.4	0.876606	-0.19	0.246739
CA13	64847.6	102046	115434	59507.5	103808	98059.9	108736	64232.5	85458.9	93709.2	1.09654	0.132959	0.647097
CA2	35955.6	36420.6	32674.4	32481.7	33031.7	34866.8	33353.6	30295.3	34383.1	32886.9	0.956484	-0.0641876	0.331452
CA8	2.49806e+06	2.16072e+06	2136241	2.06584e+06	2.24873e+06	2.38516e+06	1.95404e+06	2.45474e+06	2.21521e+06	2.26067e+06	1.02052	0.0293017	0.767623
CAAP1	75719.6	55185.7	43858.8	55018.9	68931	48431.3	55419.4	76315.2	57445.7	62274.2	1.08405	0.116435	0.61753
CAB39	761740	797969	735019	678191	657029	701766	738132	614508	743230	677859	0.912044	-0.132824	0.126552
CAB39L	870616	982610	887893	858172	868992	808582	1074753	807462	899823	889947	0.989025	-0.0159206	0.893308
CABIN1	43391.4	46780	38388.5	45189.1	44969	44973.1	51788.1	47031.9	43437.2	47190.5	1.08641	0.119564	0.173867
CACTIN	71775.4	74297	66685.8	74855.4	68620.5	69888	73479.6	80622.4	71903.4	73152.6	1.01737	0.0248496	0.717676
CACUL1	16811.9	13602.2	9164.63	11863.8	6119.42	11374.8	13773.3	11100.2	12860.6	10591.9	0.823593	-0.279996	0.356091
CACYBP	4.47543e+06	3.85767e+06	3.65287e+06	4345735	3.30614e+06	3.7941e+06	4304296	4291541	4.08293e+06	3.92402e+06	0.961081	-0.0572702	0.624845
CAD	1871844	1717186	1.6941e+06	1.86361e+06	1.70982e+06	1.84845e+06	1.82807e+06	1.79144e+06	1.78668e+06	1.79445e+06	1.00434	0.00625442	0.89523
CALCOCO1	30662.7	28926.5	30246.6	32517.8	29735.5	26390.7	36468.5	30700.7	30588.4	30823.8	1.0077	0.0110619	0.921102
CALCOCO2	30686.8	32807.4	26803.6	32942.6	28133.6	27498.1	33673.1	34170.4	30810.1	30868.8	1.00191	0.00274657	0.9803
CALM1;CALM2;CALM3	171323	198256	193650	182379	150844	152282	159352	178954	186402	160358	0.860281	-0.21712	0.025966
CALR	1.76511e+06	1.82202e+06	1.74445e+06	1.79445e+06	1404606	1.51614e+06	1783064	1.59755e+06	1.78151e+06	1.57534e+06	0.884274	-0.177435	0.0785779
CALU	694383	540951	692900	654874	521070	610473	769022	490916	645777	597870	0.925815	-0.111203	0.537146
CAMK1	10752	9391.32	10218.6	5488.37	10424.9	7301.7	10455.1	4559.15	8962.57	8185.21	0.913266	-0.130892	0.68961
CAMK2B	89498.9	75306.9	71625.2	83614.2	81766.4	85479.1	92630.2	86488.9	80011.3	86591.2	1.08224	0.114016	0.217414
CAMK2D	103300	78818.2	87353.9	80301.2	79692.4	84686.1	96961.5	110460	87443.4	92949.9	1.06297	0.0881041	0.558344
CAMK2G	70681.6	54444.2	45519.6	67853.4	60576.1	58143.2	56233.8	58465.6	59624.7	58354.7	0.978699	-0.0310626	0.844173
CAMKK2	15574.8	19352.5	17624.5	16036.5	16326.3	16496.7	17395.7	16249.8	17147	16617.1	0.969095	-0.0452899	0.589711
CAMKMT	28513.2	25013.5	30116.7	25738.9	19806.1	25581.2	25833.7	27729.3	27345.6	24737.6	0.904628	-0.144603	0.263181
CAMLG	21314.6	19753.8	18911.9	26257.6	17026.9	18806.1	20403.9	19626.1	21559.5	18965.7	0.879694	-0.184927	0.220072
CAMSAP1	40821.4	39761.7	39433.6	42540.6	43235.9	35276.7	42667	40903.4	40639.3	40520.7	0.997082	-0.00421602	0.954451
CAND1	2.03588e+06	1.90861e+06	1858873	1.84603e+06	1.83789e+06	1.86943e+06	1.79207e+06	1.82941e+06	1.91235e+06	1.8322e+06	0.958089	-0.0617678	0.161377
CAND2	37832.4	105830	100879	110334	76808.9	77157.4	95697.5	42806.7	88718.9	73117.6	0.824149	-0.279023	0.476487
CANT1	44951.9	48610.1	50905.1	43612.2	45007.9	42244.2	46200.2	45042.1	47019.9	44623.6	0.949038	-0.0754628	0.263171
CANX	4.38343e+06	4.84604e+06	4.24652e+06	4.31259e+06	3.00237e+06	3.78749e+06	4.65484e+06	4.13061e+06	4.44715e+06	3.89382e+06	0.875578	-0.191693	0.213105
CAP1	4.31767e+06	3999379	4.20248e+06	4140552	3.97127e+06	4.04725e+06	3982063	4.15401e+06	4.16502e+06	4038647	0.969659	-0.0444513	0.167333
CAPG	120450	49248.3	62488.5	136188	71593.9	55500.4	57618.8	86027.5	92093.8	67685.2	0.734959	-0.444264	0.343897
CAPN1	1.73215e+06	1.84229e+06	1.75829e+06	1.71984e+06	1.49226e+06	1.69784e+06	1.77083e+06	1.71281e+06	1.76314e+06	1.66843e+06	0.946286	-0.079652	0.226
CAPN2	896740	888822	794477	853576	703626	869361	836850	896430	858404	826567	0.962911	-0.0545249	0.544154
CAPN7	134079	124158	116920	124449	107886	114968	120406	129247	124901	118127	0.945762	-0.0804513	0.283433
CAPNS1	136764	121414	117274	125430	114501	105457	133000	122584	125221	118886	0.949409	-0.0748991	0.416603
CAPRIN1	727645	574264	827207	792671	753908	720595	873525	576316	730447	731086	1.00088	0.00126236	0.994099
CAPRIN2	17818	10849.1	11445.5	9820.76	11922.3	10577.5	33249.5	19889.6	12483.3	18909.8	1.5148	0.599126	0.312747
CAPZA1	3.31833e+06	3991574	3.67352e+06	3957918	3.37029e+06	3.44351e+06	3905187	3.71499e+06	3.73534e+06	3.60849e+06	0.966043	-0.0498408	0.549024
CAPZA2	850008	898329	854659	808372	810237	834404	776921	783796	852842	801340	0.939611	-0.0898646	0.0675338
CAPZB	3348699	3.19321e+06	2.89442e+06	3.12373e+06	3.04808e+06	3.22446e+06	3.03275e+06	3.19089e+06	3.14002e+06	3.12404e+06	0.994914	-0.00735648	0.887081
CARD10	48181.9	284066	207523	42678.7	223807	235795	311487	33283.2	145612	201093	1.38102	0.465729	0.534599
CARD11	211079	193862	171347	159845	204969	157857	224954	240602	184033	207095	1.12532	0.170331	0.327512
CARD19	1	1	1	1	10663.8	1	17336.9	1	1	7000.68	7000.68	12.7733	0.199268
CARD6	11049.5	12261.2	9386.23	17584.2	10228.8	12959	12619.2	13907.8	12570.3	12428.7	0.988738	-0.0163399	0.945148
CARD8	10798.7	15294.5	8103.54	14954.3	10927.6	10839.6	14634.8	13270.3	12287.8	12418.1	1.01061	0.0152217	0.949846
CARD9	16705.1	12058.2	16302.8	16959.1	19202.2	14713.3	12076.1	20874.4	15506.3	16716.5	1.07804	0.108416	0.626485
CARHSP1	660348	275469	425260	412419	488087	572636	428022	515977	443374	501181	1.13038	0.176807	0.536861
CARM1	347964	317915	289932	354546	317973	309203	326355	326547	327589	320020	0.976893	-0.0337278	0.653214
CARMIL1	39012	51983.5	56004.6	39906.7	46677.7	51638.1	60684.1	35864.6	46726.7	48716.1	1.04258	0.0601514	0.777304
CARNMT1	41543.7	35888.1	34928.8	42243.3	33146.2	34105.2	39591.8	42263.7	38651	37276.7	0.964445	-0.0522292	0.6514
CARS1	1.34937e+06	1.26004e+06	1.15795e+06	1.3834e+06	1.23172e+06	1.30599e+06	1.36905e+06	1.34213e+06	1.28769e+06	1.31222e+06	1.01905	0.0272238	0.693348
CARS2	61743.5	60399.1	62508.8	51834.9	63702.3	58374	58613.2	64126.5	59121.6	61204	1.03522	0.049941	0.507663
CASC3	59809.6	59613.9	57025	65271.7	54248.8	56077.8	64857	73175	60430	62089.7	1.02746	0.039088	0.741758
CASK	42497.5	39325.4	71650.4	41215.4	98569.6	34114.4	74744.4	50505.5	48672.2	64483.5	1.32485	0.405831	0.373301
CASKIN2	25228.9	56760.8	47847.6	27208.2	42343.8	32114.9	47119.4	57231.5	39261.4	44702.4	1.13858	0.187241	0.584677
CASP10	57215.5	62934	53089.1	49046.7	66664.9	55187.8	63523.1	64046	55571.3	62355.5	1.12208	0.166176	0.13174
CASP2	55973.9	53380.4	42342.6	54567.8	48002.9	52740.9	55348.1	62195.6	51566.2	54571.9	1.05829	0.0817332	0.51093
CASP3	196884	176388	168779	218195	67988.4	183771	225644	244489	190062	180473	0.949551	-0.0746827	0.828677
CASP6	129310	123289	122445	132846	131990	120951	132736	135975	126973	130413	1.0271	0.0385709	0.436477
CASP7	11384.6	17964.3	6309.46	9964.01	13273.6	12792.1	16857.2	10469.8	11405.6	13348.2	1.17032	0.226901	0.516609
CASP8	112069	117410	106538	119147	118728	115632	121200	118576	113791	118534	1.04168	0.0589126	0.198113
CASP8AP2	44016.9	25003.9	22912.4	17645.7	1	22086.8	29565.7	21535.4	27394.7	18297.2	0.667911	-0.582271	0.330289
CASP9	165889	135602	130971	160852	123758	130261	151765	163644	148328	142357	0.959743	-0.0592804	0.657051
CAST	31077.8	32938.3	34131.5	31748.3	46606.4	33288	38934.1	30572.9	32474	37350.3	1.15016	0.201837	0.263538
CASTOR2	32602	31210	26946.4	32824.8	30817.3	29011	37072.6	33987	30895.8	32722	1.05911	0.0828482	0.44823
CAT	1.00938e+06	1.07017e+06	997976	1.05683e+06	880731	952238	1.03782e+06	1.0328e+06	1.03359e+06	975896	0.944182	-0.0828637	0.230097
CAVIN1	632042	1.03401e+06	960776	623094	951561	992201	1.02588e+06	878603	812480	962060	1.1841	0.243795	0.262943
CAVIN2	16532.5	26980.7	26508.4	13970.4	29483.4	22765.2	31026.3	20561.1	20998	25959	1.23626	0.305984	0.286636
CBFA2T3	34503	42134.4	44125.9	56934.6	48204	47969.1	64243.6	45693.6	44424.5	51527.6	1.15989	0.21399	0.304479
CBFB	300707	258683	279182	293342	254619	267984	287448	294986	282978	276259	0.976255	-0.0346703	0.624659
CBL	77756.5	73265.8	54000.4	70844.3	84047.2	74560.7	75567.5	77053	68966.7	77807.1	1.12818	0.174002	0.190618
CBLB	16259.9	1	16371.6	23804.6	16561.3	13511.1	14978	17331.6	14109.3	15595.5	1.10534	0.144486	0.788546
CBLL1	77697.3	77185.2	82971.2	78068	65356.7	78789.2	77408.2	79115	78980.4	75167.3	0.95172	-0.0713904	0.344168
CBR1	621289	653773	591521	660017	576782	626781	631748	661925	631650	624309	0.988378	-0.0168659	0.767447
CBR3	300705	365594	334149	360984	303541	319535	359502	342783	340358	331340	0.973506	-0.0387385	0.658757
CBR4	89765.8	90097.9	88128.7	106305	92628	98936.5	90562	121924	93574.4	101013	1.07949	0.11035	0.415528
CBS	199985	563317	564335	641787	474582	602264	626851	622021	492356	581430	1.18091	0.239903	0.448685
CBX1	289669	229448	282403	297993	343025	285856	314207	272888	274878	303994	1.10592	0.145249	0.233528
CBX2	87217.7	99011.1	81613.2	95608.1	83227.5	93702.7	96940.6	93827.8	90862.5	91924.7	1.01169	0.0167665	0.838067
CBX3	1.58025e+06	1.40611e+06	1.44505e+06	1.42164e+06	1.22244e+06	1.49684e+06	1.44622e+06	1.57852e+06	1.46326e+06	1.436e+06	0.981371	-0.0271299	0.765356
CBX4	73535.6	76707.5	70823.5	82625.6	80561.2	78925.4	83488	91724	75923	83674.6	1.1021	0.140252	0.0888118
CBX5	371528	349283	267664	329252	129245	328335	367634	358134	329432	295837	0.898022	-0.155177	0.60844
CBX8	94950	88177.2	89554.9	86607	72809.1	88974.4	98212.5	93721.2	89822.3	88429.3	0.984492	-0.0225489	0.823918
CC2D1A	112748	123567	111097	124850	112899	118304	129872	127993	118065	122267	1.03559	0.0504488	0.464831
CC2D1B	125909	145090	121006	139949	123902	126137	144242	142908	132989	134297	1.00984	0.0141268	0.872827
CCAR1	914793	867843	855979	942141	889498	885135	916693	931517	895189	905711	1.01175	0.016858	0.667834
CCAR2	1.25119e+06	1.31139e+06	1.2661e+06	1.35393e+06	1.22754e+06	1.33197e+06	1.32866e+06	1.34246e+06	1.29565e+06	1.30766e+06	1.00927	0.0133051	0.747256
CCDC106	28687.1	28324.6	26627.7	28994.2	33011.6	25778.1	30457.8	19776.4	28158.4	27256	0.967951	-0.0469935	0.77895
CCDC115	28709	26778.1	31750.6	33355.9	43444.1	26857.6	32821.3	29594.6	30148.4	33179.4	1.10054	0.138207	0.483076
CCDC117	19337.5	22598.9	22115.5	31848.9	32845.2	28850.6	45125.8	22908.5	23975.2	32432.5	1.35275	0.435898	0.182298
CCDC12	77197.5	35330.7	58289.7	74848.6	67281.9	66750.8	69534.9	39630.2	61416.6	60799.4	0.98995	-0.0145718	0.960723
CCDC124	690313	711063	650257	685709	625207	621140	687009	794059	684336	681854	0.996373	-0.00524189	0.956288
CCDC127	95344.8	80275	69838.5	85675.1	87875	72476.4	79188.1	84182.1	82783.4	80930.4	0.977616	-0.0326597	0.779731
CCDC134	101772	106230	93751.7	106304	86172.5	93753.7	107009	117792	102014	101182	0.991837	-0.0118248	0.91809
CCDC137	96236.1	118956	104294	120953	94393.6	111097	116811	122503	110110	111201	1.00991	0.0142263	0.901874
CCDC174	37807.5	54709.9	31082.9	42070.8	55845.1	31005.8	60184.3	54667.3	41417.8	50425.6	1.21749	0.283907	0.319725
CCDC183	1	69349.1	3032.76	1	1	49041.3	50857.9	14722	18096	28655.6	1.58353	0.663147	0.638788
CCDC186	6843.99	1	10904.7	10258.7	9430.63	1	1	1	7002.1	2358.41	0.336814	-1.56997	0.225268
CCDC22	185123	187081	161456	179564	194828	186348	203157	191982	178306	194079	1.08846	0.122286	0.0692527
CCDC25	143060	157637	124403	149858	149893	141999	163339	162233	143740	154366	1.07393	0.102898	0.274836
CCDC28A	1	8316.06	4552.91	4933.79	1	7006.88	8717.88	9012.73	4450.94	6184.62	1.38951	0.474575	0.547367
CCDC28B	7768.33	9717.54	1	10151.5	6943.72	7844.64	10270	1	6909.58	6264.84	0.906688	-0.141321	0.848348
CCDC38	228663	268136	233977	365023	1	143656	966602	266497	273950	344189	1.25639	0.329288	0.766415
CCDC43	183058	215142	184420	156982	237938	186089	164982	214948	184901	200989	1.08701	0.120368	0.453226
CCDC47	346655	333976	287967	336428	170899	329325	340275	364884	326256	301346	0.923646	-0.114588	0.620586
CCDC50	160940	150250	119340	159725	141674	137348	164808	157939	147564	150442	1.01951	0.0278708	0.814931
CCDC51	180919	183927	152394	200423	169639	169340	200747	177876	179416	179400	0.999916	-0.000121752	0.999069
CCDC59	124652	114697	117514	106071	98219.4	106761	120299	115087	115734	110092	0.951249	-0.0721049	0.398207
CCDC6	272660	236414	270014	284316	260288	254373	283451	213646	265851	252940	0.951434	-0.0718246	0.498415
CCDC71L	187501	192016	177346	182595	152421	189834	181150	190235	184865	178410	0.965086	-0.0512711	0.534786
CCDC8	14246.6	16571.5	14446.4	16512.8	19588.2	17406.1	24751.8	17269.8	15444.3	19754	1.27904	0.355065	0.0853068
CCDC82	19071.9	25734.8	16048.5	28927.6	10734.7	20914	27297.6	23934.5	22445.7	20720.2	0.923125	-0.115402	0.72326
CCDC85C	25139.3	28317.3	34749.8	42296.6	26661.4	23700.5	30325.1	27482.2	32625.7	27042.3	0.828864	-0.270793	0.242424
CCDC86	496331	552354	479603	526677	447085	487818	541862	574860	513741	512906	0.998374	-0.00234723	0.98061
CCDC88A	35321.1	40035.5	40487.1	36531.5	42879.2	35400.7	37414.1	37845.3	38093.8	38384.8	1.00764	0.0109798	0.891465
CCDC88B	1	16348.6	13337.9	27819.8	29728.3	19786.1	28300.6	23051.7	14376.8	25216.7	1.75398	0.810635	0.154461
CCDC88C	33204	47739.7	33028.7	32924.6	49191.7	38080.6	31038.5	32121.1	36724.2	37608	1.02406	0.0343063	0.878766
CCDC9	290354	329907	239590	307001	285745	272004	308766	310666	291713	294295	1.00885	0.0127139	0.909029
CCDC92	1	24465.3	23202.4	22637.5	29695.9	16939.7	29330.9	1	17576.6	18991.9	1.08052	0.111729	0.882019
CCDC93	131378	132466	125823	128441	118657	113215	135625	122977	129527	122619	0.946667	-0.0790718	0.247154
CCDC97	111285	111029	97968.9	116851	102308	112013	126270	116513	109284	114276	1.04568	0.0644458	0.465462
CCM2	14526.7	14781.3	13151.2	14522.4	19964.6	14356.7	14997.7	15691.7	14245.4	16252.7	1.14091	0.190183	0.212635
CCNA2	93139.3	95942	90339.3	97695.9	80895.7	92776.8	103822	90295	94279.2	91947.5	0.975269	-0.0361286	0.666033
CCNB1	458563	509222	428926	485402	481356	453053	501292	483034	470528	479684	1.01946	0.0278016	0.66657
CCNB2	287148	293763	262736	272376	279818	280974	300882	274306	279006	283995	1.01788	0.0255707	0.604782
CCNC	21145.3	30988.6	21971.9	27298.7	24485.7	23026.3	24594.4	19521.4	25351.1	22907	0.903587	-0.146264	0.396252
CCND3	72783.4	58745.8	56426.7	54799.6	83704.8	70121.7	52675	90011.5	60688.9	74128.2	1.22145	0.288592	0.212987
CCNDBP1	35233.1	48951.2	41258	39082.1	41588.3	26984.7	46217.5	40036.1	41131.1	38706.7	0.941055	-0.0876488	0.649026
CCNE1	75291.8	55049.2	102067	82508.2	61150.6	74589.5	76794.6	68313.3	78729	70212	0.891819	-0.165178	0.458455
CCNF	5992.32	10428.9	11042.6	11188	1	6853.96	16173.9	10902	9662.96	8482.72	0.877859	-0.187939	0.762134
CCNH	104322	104724	75238.3	99854.8	62348.4	98153.4	95708.1	87027.2	96034.8	85809.3	0.893523	-0.162424	0.380112
CCNK	428173	498144	413442	490642	429089	438047	489651	495022	457600	462952	1.0117	0.0167764	0.8523
CCNL1	24800.9	20983.3	16015.9	23397	19588	20069.7	25718.1	19723.3	21299.3	21274.8	0.998849	-0.00166106	0.992315
CCNL2	82997.4	91086.1	86962.4	93550.6	95440.4	85887.7	92621.5	75812.3	88649.2	87440.5	0.986366	-0.0198054	0.817418
CCNQ	8611.6	9784.33	8192.47	10926.4	1	9997.46	13739.5	8703.56	9378.69	8110.37	0.864766	-0.209618	0.696018
CCNT1	163219	174377	163224	176585	162656	161860	184912	176531	169351	171490	1.01263	0.0181014	0.760237
CCNT2	42374.2	51413.6	45206	42621.3	42333.8	44740.4	44920.7	42760.1	45403.8	43688.8	0.962227	-0.0555502	0.484873
CCNY	27465.7	31177.1	28705.8	28749	34427.2	25581.4	27639.6	23343.7	29024.4	27748	0.956022	-0.0648848	0.641196
CCP110	7720.72	7544.85	5568.17	7971.83	7747.86	5707.32	8729.27	8235.88	7201.39	7605.08	1.05606	0.0786877	0.656901
CCPG1	18373.8	18028.9	23903	19724.5	1	19593.9	19016.5	22093.6	20007.6	15176.2	0.758525	-0.398731	0.419889
CCS	51801.7	42384.7	31965.6	52841.4	35718.6	39825.4	62330.5	47620.2	44748.4	46373.7	1.03632	0.0514714	0.838396
CCT2	6.00744e+06	6.47029e+06	6039485	6.41338e+06	6221777	5856169	6201626	6205395	6.23265e+06	6.12124e+06	0.982125	-0.0260208	0.489074
CCT3	15302484	16287712	15564049	14792116	14675553	15053461	14576993	15118544	1.54866e+07	1.48561e+07	0.95929	-0.0599604	0.135262
CCT4	7.53907e+06	7.67302e+06	7330967	7162038	7529577	7.38777e+06	6788837	7004271	7.42627e+06	7.17761e+06	0.966516	-0.0491345	0.27626
CCT5	4243478	4.16752e+06	4.11231e+06	4.18119e+06	3.17774e+06	4.00343e+06	4.22315e+06	4.14823e+06	4.17612e+06	3.88814e+06	0.93104	-0.103085	0.318831
CCT6A	11011524	10684808	11095863	11583062	10390400	10569539	11363647	10877516	1.10938e+07	1.08003e+07	0.97354	-0.0386874	0.339613
CCT6B	3.89827e+06	4.15712e+06	3.68862e+06	3741094	6273108	3187465	4.16181e+06	3.64415e+06	3.87128e+06	4.31663e+06	1.11504	0.157097	0.562632
CCT7	7457533	7.18504e+06	7201061	7678268	6715169	7233073	7.20573e+06	7.41307e+06	7.38048e+06	7.14176e+06	0.967656	-0.0474344	0.258092
CCT8	11216141	11781509	11140957	11564225	11148833	11145053	11228486	11379983	11425708	1.12256e+07	0.982485	-0.0254925	0.282575
CCZ1B;CCZ1	144565	146793	134195	159403	137103	138994	148318	149458	146239	143468	0.981055	-0.0275938	0.667102
CD109	1	1	48368.5	1	8655.5	1	1	4557.75	12092.9	3303.81	0.273203	-1.87195	0.522857
CD151	63015.1	48173.5	43869.3	34885.9	70049.9	61478.9	54984.7	79884.4	47486	66599.5	1.40251	0.488009	0.0538013
CD276	17582.4	30146.6	30733.2	26519.4	44228.3	31477.5	29405.5	20372.4	26245.4	31371	1.19529	0.257366	0.4157
CD2AP	600590	425801	464044	497875	562972	575497	525705	597711	497077	565471	1.13759	0.185983	0.166971
CD2BP2	331592	301840	342446	313448	333952	314703	355036	273589	322332	319320	0.990657	-0.0135431	0.884256
CD320	1	1	1	1	1	13171.4	1	1059.55	1	3558.23	3558.23	11.7969	0.349167
CD33	14731.4	27637.6	34200.1	27357.9	24783.1	16498.7	24569.9	45216.3	25981.8	27767	1.06871	0.0958733	0.817498
CD36	1	65863.3	22380.5	8456.97	1	17665.2	16363.4	39170.4	24175.4	18300	0.756967	-0.401698	0.740346
CD37	141569	178392	1	1	76311.1	42612.6	1	88116.5	79990.9	51760.3	0.647078	-0.627989	0.607708
CD38	1	1	1	32964.5	1	1	32572.1	1	8241.88	8143.78	0.988098	-0.0172744	0.993519
CD44	71498	62219.8	55154.2	57052.4	109796	52200.4	68220.1	55758.5	61481.1	71493.8	1.16286	0.217676	0.511808
CD46	155709	174578	143396	122201	216639	204162	153120	184010	148971	189483	1.27195	0.347036	0.0641554
CD47	214863	295942	299590	265085	294935	224069	280460	237691	268870	259289	0.964364	-0.0523506	0.724135
CD55	105456	82611.9	80325.2	84765.4	106722	88022.9	69088.7	90620	88289.6	88613.3	1.00367	0.00527998	0.974396
CD59	32506.8	36045	24073.8	36346.9	51735.8	59526.1	32357.6	19885.8	32243.1	40876.3	1.26775	0.342274	0.419066
CD63	104390	92617.9	102084	146245	327309	59204.9	97819.6	121246	111334	151395	1.35982	0.443418	0.556215
CD69	10887.2	1	1	1	1	10633.1	1	1	2722.55	2659.01	0.976663	-0.0340671	0.987217
CD81	113832	72865.2	38796.7	57901.5	111522	98842.1	43475.2	68380	70848.8	80554.8	1.137	0.185227	0.67598
CD84	24186	18861.8	24100.6	25445.4	22909.9	14794.6	26975.7	21573.3	23148.4	21563.4	0.931526	-0.102333	0.611893
CDAN1	83996.2	91079.4	99977.4	81063.4	82027.6	85640	83696.7	84834.3	89029.1	84049.6	0.944069	-0.0830351	0.324216
CDC123	290527	281901	265921	296364	219340	253441	295700	289019	283678	264375	0.931954	-0.101669	0.366038
CDC16	181322	190793	179846	163700	169462	173426	170901	164009	178915	169449	0.947093	-0.0784218	0.192522
CDC20	170583	200696	155077	213934	201053	189199	202392	194000	185072	196661	1.06262	0.0876229	0.458776
CDC23	271335	245150	244340	232539	263132	241722	248038	222938	248341	243958	0.982348	-0.0256938	0.720231
CDC25C	34650	35418.2	25805.5	37324.8	1	34356.9	39029.6	37718.7	33299.6	27776.6	0.83414	-0.261638	0.602509
CDC26	15073.5	7027.94	1	8274.06	1	8242.13	7472.3	18502.6	7594.13	8554.5	1.12646	0.1718	0.85126
CDC27	210401	205226	203406	194378	196710	206473	197113	196389	203353	199171	0.979437	-0.029976	0.354252
CDC34	234209	238416	243432	243468	234444	224037	241277	214982	239881	228685	0.953325	-0.0689596	0.14742
CDC37	3.4366e+06	2.76892e+06	3.21827e+06	3274956	2.93068e+06	2.84424e+06	3375552	3.48809e+06	3174686	3.15964e+06	0.995261	-0.00685374	0.94636
CDC40	125617	113818	112846	115330	114989	115854	117719	108448	116903	114252	0.977327	-0.0330863	0.489725
CDC42	1.99616e+06	1.92572e+06	1.60774e+06	2.06797e+06	1.72982e+06	1.90375e+06	1.95978e+06	2287564	1.8994e+06	1.97023e+06	1.03729	0.0528222	0.663119
CDC42BPA	134768	133538	139812	130950	136983	118843	142821	128927	134767	131894	0.978679	-0.0310918	0.632006
CDC42BPB	15615.9	15457.9	14529.2	17696.3	13567	15326.2	17498.8	16133.5	15824.8	15631.4	0.987774	-0.017747	0.861274
CDC42BPG	29310.2	50726.3	43367.6	32287.6	52279.4	50660.9	61904.7	24944.2	38922.9	47447.3	1.21901	0.285706	0.402428
CDC42EP1	84272.4	65649	81499.5	109145	61898.1	74584.3	116090	60879.4	85141.4	78362.8	0.920384	-0.119692	0.684099
CDC42EP4	52669.6	42464.7	38440.3	35549.2	44776.9	39947.3	43264.7	34197.9	42280.9	40546.7	0.958984	-0.0604219	0.710568
CDC42SE1	35086.5	10562.5	5046.28	17592.4	20124.2	38839.7	6478.58	35688.5	17071.9	25282.7	1.48096	0.566529	0.440651
CDC42SE2	22855.1	32648.6	22957.9	33842.9	1	32073.2	34287.5	28342.6	28076.1	23676.1	0.843281	-0.245914	0.634311
CDC45	505131	484508	478799	523089	389713	469425	504844	452076	497882	454015	0.911892	-0.133065	0.167918
CDC5L	1.03888e+06	1055967	1.0193e+06	1.10335e+06	981743	1014392	1.12528e+06	1.10574e+06	1.05437e+06	1.05679e+06	1.00229	0.00330062	0.953455
CDC6	186222	198130	191469	198811	222968	157171	208357	188484	193658	194245	1.00303	0.00436476	0.970162
CDC7	58448.8	58701.6	59667	60836.3	58147.9	59614.5	66224.8	58945.1	59413.4	60733.1	1.02221	0.031694	0.537085
CDC73	447036	460690	448565	469764	419825	435743	468866	435715	456514	440037	0.963908	-0.0530324	0.221679
CDCA2	79223.1	75155.5	64354.7	67615.2	74722.6	77760.2	70991.2	87299.4	71587.1	77693.4	1.0853	0.118091	0.25697
CDCA3	16382.6	18226.6	21034.5	24972.1	34111.7	25404.1	27013.1	16930.8	20153.9	25864.9	1.28337	0.359936	0.217373
CDCA5	299983	342768	286322	304199	303558	321537	323965	364318	308318	328345	1.06495	0.0907919	0.299523
CDCA7	46534.2	42437.1	37453.2	49604.5	61830.2	42630	50690.6	46822.5	44007.2	50493.3	1.14739	0.198352	0.241066
CDCA7L	26213.4	27512.2	30598.3	31727.4	51676.7	56163.7	1	1	29012.8	26960.6	0.929264	-0.105839	0.903837
CDCA8	429328	466466	388325	447536	371761	408311	449077	488182	432914	429333	0.991728	-0.0119843	0.910066
CDCP1	40804.3	38232.5	40436.6	22316.6	32086.2	24424.2	34120.8	41496.9	35447.5	33032	0.931857	-0.10182	0.684079
CDHR1	28040.2	29674.9	11048.7	1	1	9464.65	37568.5	35102.8	17191.2	20534.2	1.19446	0.256361	0.786022
CDIN1	2883.35	1	1	4278.43	1	4208.28	4093.7	776.113	1790.94	2269.77	1.26736	0.341828	0.765555
CDIPT	25611.2	24049.3	19392	20180.2	30483.6	21927.6	23053.5	18554.4	22308.2	23504.8	1.05364	0.0753816	0.700042
CDK1	3.15737e+06	3.15021e+06	2.94463e+06	3.43456e+06	2.25511e+06	3.00997e+06	3.22125e+06	3217138	3.17169e+06	2.92587e+06	0.922494	-0.116388	0.379786
CDK10	428192	1	1	1	1	144283	291914	320297	107049	189123	1.7667	0.821059	0.554146
CDK11A	20602.7	62507.3	59849.9	74536.3	1	72224.9	1	93933.5	54374	41540.1	0.76397	-0.388413	0.658223
CDK11B	536424	545113	524327	553425	489198	542646	583648	549476	539822	541242	1.00263	0.00378856	0.948458
CDK12	136585	144080	127816	147259	133765	146638	151426	149839	138935	145417	1.04666	0.0657881	0.314327
CDK13	58818.5	54013.8	51321.9	63075	55615.3	59317.5	63402.2	65057.1	56807.3	60848.1	1.07113	0.099135	0.275719
CDK16	27331	19476.1	21457.2	30688	34051.9	22882.4	24612.5	17523.9	24738.1	24767.7	1.0012	0.00172669	0.994754
CDK17	38998.9	31460	24007.4	34935.8	31838	31138	29933.2	23720.8	32350.5	29157.5	0.901298	-0.149923	0.426629
CDK19	51482.1	60814.3	45846.7	48441.8	57792.8	53116.2	44199.9	56007.9	51646.2	52779.2	1.02194	0.0313071	0.807435
CDK2	1.21478e+06	1.19708e+06	1.11407e+06	1.28362e+06	991788	1.17068e+06	1.25122e+06	1.21181e+06	1.20238e+06	1.15638e+06	0.961735	-0.0562884	0.523361
CDK2AP1	18478.5	11625.8	23451.5	18186	28825	17138.2	19124.5	16735.6	17935.5	20455.8	1.14052	0.189698	0.525353
CDK4	81036.4	74891.9	76434.1	85859.4	81033.7	78934.8	88562.3	84934.9	79555.5	83366.4	1.0479	0.0675053	0.288392
CDK5	449959	417415	431771	440595	437264	429423	457220	421978	434935	436471	1.00353	0.00508687	0.886029
CDK5RAP1	134679	136099	126607	139047	123634	126930	146732	134730	134108	133007	0.991787	-0.0118982	0.857183
CDK5RAP2	45996.2	43113.3	41831.6	48966	56639	45418.6	50284.6	45606.3	44976.8	49487.1	1.10028	0.137873	0.203613
CDK5RAP3	106152	119509	103042	108760	107161	103216	123603	107672	109366	110413	1.00958	0.0137494	0.861895
CDK6	289612	299925	264582	307290	280840	286640	302166	299790	290352	292359	1.00691	0.00993547	0.858417
CDK7	194148	227594	234718	216389	209080	217407	212114	200437	218212	209760	0.961264	-0.0569961	0.426788
CDK8	5149.87	4773.95	3810.1	3317.05	1	3335.13	3699.01	1	4262.74	1759.04	0.412654	-1.277	0.0854579
CDK9	639348	597524	543750	678892	599726	613955	653860	669066	614879	634152	1.03134	0.0445268	0.588512
CDKAL1	218172	229340	211099	230616	230319	241436	234568	235116	222307	235360	1.05872	0.0823165	0.0607892
CDKN2AIP	159055	151322	142574	144654	143566	143886	157522	145963	149401	147734	0.988844	-0.0161848	0.749236
CDR2	5272.1	1	1	8889.82	1	9939.97	11682.8	1	3540.98	5406.2	1.52675	0.610467	0.644706
CDS2	42893.5	55733.1	53584.8	49182.7	52218.1	56312.4	46818.3	43916.9	50348.5	49816.4	0.989432	-0.0153271	0.897509
CDT1	40593.2	38722.4	27141	39074.2	38894.9	34014.7	33435.1	41560.8	36382.7	36976.4	1.01632	0.023352	0.87784
CDV3	657829	827386	631025	591209	472491	633950	602764	699548	676862	602188	0.889677	-0.168647	0.331023
CDYL	50294.1	42874.7	42544.9	44411.5	43364.4	42123.3	42284.4	47871.9	45031.3	43911	0.975121	-0.0363464	0.637595
CEBPB	39846.2	32308.3	23053	31730.9	36733.4	40074.4	29031.7	45285.7	31734.6	37781.3	1.19054	0.251617	0.257788
CEBPG	2434.44	2404.55	2495.61	1905.39	2296.73	1921.77	2487.16	2204.67	2310	2227.58	0.964323	-0.0524114	0.663499
CEBPZ	364826	354441	328990	364578	305003	336868	367335	358587	353209	341948	0.968119	-0.0467442	0.519233
CECR2	8491.13	2285.08	1530.9	8160.46	1	5528.04	7487.05	10671.1	5116.89	5921.8	1.1573	0.210769	0.791797
CEFIP	6918.63	5974.32	3301.39	9932.85	1	5618.38	6966.88	8909.93	6531.8	5374.05	0.822752	-0.281471	0.641927
CELF1	148557	122962	97519.7	159777	66298.8	126763	143874	138299	132204	118809	0.898677	-0.154125	0.576754
CELF2	230637	218461	171632	233800	199687	207283	214237	228413	213632	212405	0.994255	-0.00831245	0.941132
CENATAC	27095.9	21745.1	38832.7	28516.1	28727.3	22189.7	40220.7	21715.8	29047.4	28213.4	0.971285	-0.0420331	0.886608
CENPA	15659	10119.2	9498.45	7741.69	7487.23	12479.1	11852.8	11273.7	10754.6	10773.2	1.00173	0.00249831	0.993072
CENPB	110005	104157	98643.8	105385	110639	112536	113828	111064	104548	112017	1.07144	0.0995515	0.0439451
CENPC	200813	198670	190017	186213	188521	187163	182305	181312	193928	184825	0.953062	-0.0693573	0.0730681
CENPE	30753.8	33808.3	33315.8	32926	34289.7	30254	34993.4	35352.4	32701	33722.4	1.03124	0.0443736	0.4868
CENPF	157580	148430	137032	137517	172826	153877	152380	159238	145140	159580	1.0995	0.136841	0.0768889
CENPH	37492.7	42292.4	32763.2	38594.3	33106.6	37400.1	43575.7	44666.8	37785.6	39687.3	1.05033	0.0708403	0.592873
CENPI	19748.1	22095.8	18183.7	25445.4	22390.8	17899.4	26920.4	17855.4	21368.3	21266.5	0.995238	-0.00688687	0.971043
CENPJ	12802.1	8431.84	8574.78	7742.41	10510.8	8416.89	7007.87	9590.62	9387.79	8881.55	0.946075	-0.0799729	0.728078
CENPL	19656.8	16937.7	16354.7	22050.3	1	18605.7	21038.5	12896.7	18749.9	13135.4	0.700562	-0.513415	0.323006
CENPM	29350.1	23562.8	20205.3	23289.2	21927.8	25607.4	26691.3	24251.6	24101.8	24619.5	1.02148	0.0306598	0.821417
CENPN	21174.1	17975.6	16966.5	23621.6	18322.4	19589	25030.8	20538.6	19934.5	20870.2	1.04694	0.0661766	0.672738
CENPO	19202.3	20810.4	21541.5	25987.6	15736.1	21020.1	32494.5	22378.3	21885.5	22907.2	1.04669	0.0658293	0.800868
CENPP	52360.1	50728.9	43627.9	54620.9	19708.6	46001	50275.1	50360.3	50334.5	41586.3	0.826199	-0.275439	0.327503
CENPQ	43509.2	56028	53628.8	44982	47841.5	48949.9	49227.4	50506.9	49537	49131.4	0.991813	-0.0118598	0.905451
CENPT	21805.1	24430.9	22719.9	24197.8	22146	19833.8	25827.9	25789.6	23288.4	23399.3	1.00476	0.0068544	0.947885
CENPU	66162.2	72111.8	55719.4	72156.3	59772.9	64186.7	70899.8	76813.1	66537.4	67918.1	1.02075	0.0296306	0.80625
CENPV	62742.9	65878.1	49761.7	60682.2	65220.5	63861.2	65988.9	73522.9	59766.2	67148.4	1.12352	0.168022	0.133033
CEP131	46303.7	49540	49503	51196.6	49767.3	45723.8	53958.9	50745.2	49135.8	50048.8	1.01858	0.0265594	0.664636
CEP152	1518.51	991.296	1	1461.09	1	1	1	1	992.976	1	0.00100707	-9.95561	0.0664495
CEP170	165746	169636	160232	161180	163702	165860	171730	167454	164198	167187	1.0182	0.0260187	0.322882
CEP192	49894.7	50397.8	41814	44253.7	49106.2	47824.2	49093.4	45908.3	46590	47983	1.0299	0.0425031	0.570738
CEP250	16523.3	17827.5	14273.4	12988.5	16302.5	15271	21359.9	14719.7	15403.2	16913.3	1.09804	0.134929	0.452838
CEP350	42904.5	41701.9	36356.9	44181.8	52167.9	42925.4	42754.5	45708.4	41286.3	45889.1	1.11149	0.152489	0.153205
CEP41	11068.9	10018.3	9502.78	12893.3	10718	11194.5	14935.5	12635.3	10870.8	12370.8	1.13798	0.186481	0.262771
CEP43	34602.3	33951.1	32267	38595.4	34820.1	30240.5	43601.8	28556.4	34853.9	34304.7	0.984242	-0.0229148	0.887089
CEP44	51592.8	45385.2	38011.6	42769.6	53789.6	44017.5	51495.8	44980.8	44439.8	48570.9	1.09296	0.128239	0.309712
CEP55	35628.8	22473.4	25216.2	29791.2	31531.3	29793.3	31145.9	26176.8	28277.4	29661.8	1.04896	0.0689582	0.680501
CEP57	31562.5	23714.6	16158	30037.8	31727	25596.3	25978.8	28112.3	25368.2	27853.6	1.09797	0.134842	0.547253
CEP76	34848.8	36547.5	33070.4	36093	35441.2	35068.3	37654.3	32727.8	35139.9	35222.9	1.00236	0.00340289	0.950301
CEP78	10143.4	8778.64	6213.82	18100.3	1	14032.8	16981.3	22664.1	10809.1	13419.8	1.24153	0.312125	0.654376
CEP83	14656	17492.5	1	15564.9	15411.4	9541.15	15853.7	12408.8	11928.6	13303.7	1.11528	0.15741	0.764909
CEP85	48077.9	52034.7	46779.5	51745.6	59489.1	50270.1	53030.2	54071.1	49659.4	54215.1	1.09174	0.126628	0.105702
CEP95	23115.7	29735.3	19850	31630.4	25157	26960.2	32125.7	32384.1	26082.8	29156.7	1.11785	0.160729	0.394708
CEP97	22086.3	36634.4	26065.3	12299.8	30726.3	25490.8	9206.98	18627.1	24271.4	21012.8	0.865741	-0.207993	0.651363
CEPT1	392282	317121	425343	401353	246531	332953	311257	376714	384025	316864	0.825114	-0.277335	0.110742
CERS2	550877	625651	518506	604764	470846	570647	610706	548742	574949	550235	0.957015	-0.0633865	0.543363
CERS4	801.767	1	1	3064.36	1	1	1	1	967.032	1	0.00103409	-9.91742	0.27442
CERS5	41434.3	31462.8	26028.3	20478.1	34424	35758.3	32667	24453.7	29850.9	31825.8	1.06616	0.0924214	0.717172
CERS6	14208.6	11649.8	10549.6	9680	10204.9	11248.3	11498.6	8618.83	11522	10392.7	0.901984	-0.148827	0.380704
CERT1	214615	207209	186430	222242	197360	192321	217528	211112	207624	204580	0.98534	-0.0213069	0.764584
CES1	1808.59	6244.35	12597.5	1	10250.4	1	14147.1	774.791	5162.86	6293.33	1.21896	0.285654	0.809934
CES2	14929.2	13667.3	8497.83	13545.1	11981.4	11793.7	14534.5	14044.3	12659.8	13088.5	1.03386	0.0480383	0.7992
CETN2	157175	112182	110696	139696	146531	135419	181523	110832	129937	143576	1.10497	0.144002	0.490734
CETN3	7384.4	1	5396	1	1	1	12803.2	1	3195.6	3201.55	1.00186	0.00268258	0.998787
CFAP20	422775	420892	355605	422763	315061	387727	441499	400439	405509	386182	0.952338	-0.070454	0.561847
CFAP298	84994.9	81777.5	81826.6	113254	82889.5	90288.8	104627	84905.8	90463.3	90677.9	1.00237	0.00341739	0.982032
CFAP36	8245.93	8401.08	4281.06	1	1	12443.6	1	15112.9	5232.27	6889.62	1.31676	0.396988	0.728559
CFAP410	11060.7	14332.8	10381.9	15701.7	10779.8	12526	17711.9	15667.6	12869.3	14171.3	1.10117	0.139041	0.542471
CFAP97	10364.5	14542.5	6073.57	13384.8	1	7291.33	13227.9	13729.5	11091.3	8562.44	0.771994	-0.373339	0.527876
CFDP1	107203	94213.1	96365.3	108094	98547.1	101615	115782	80524.2	101469	99117.2	0.976824	-0.0338292	0.78451
CFH	114597	95783.6	85121.4	106337	75749.6	83992	102492	100643	100460	90719.3	0.903042	-0.147135	0.326568
CFL1	21163467	17668189	16303135	18216103	19590951	20520369	17111089	20408143	1.83377e+07	19407638	1.05835	0.08181	0.442309
CFL2	22728.3	21186.9	18753.3	24036.9	30411.4	16572.5	21666.2	19058.5	21676.4	21927.2	1.01157	0.0165964	0.941809
CGAS	1	1	1	1	68296.3	30754.7	1	1	1	24763.2	24763.2	14.5959	0.224301
CGGBP1	143230	142447	146948	129858	131795	137750	150853	101283	140621	130420	0.927459	-0.108644	0.414805
CHAC2	61739.6	62110.2	65803.5	69719.2	63145.4	58357.3	80139	66978.4	64843.1	67155	1.03565	0.0505411	0.670186
CHAF1A	209746	199825	164478	214598	177868	207012	197983	211191	197162	198513	1.00686	0.00985729	0.924183
CHAF1B	299862	334745	290527	341921	268023	276641	335811	329457	316764	302483	0.954917	-0.0665528	0.536267
CHAMP1	111916	133787	108260	124861	108877	117351	137599	112512	119706	119085	0.994812	-0.00750358	0.945477
CHCHD1	60640.2	78296.7	77751.5	73581.9	76786.3	55838.9	82954.5	65130.3	72567.6	70177.5	0.967065	-0.0483155	0.756204
CHCHD2	2.52457e+06	2.01112e+06	2147295	2340497	2179670	2.44356e+06	1.91967e+06	2.86763e+06	2.25587e+06	2.35263e+06	1.04289	0.0605917	0.694154
CHCHD3	1.32574e+06	1.15466e+06	1.24585e+06	1.3764e+06	1.49581e+06	1.29361e+06	1.44901e+06	1.33822e+06	1.27566e+06	1.39416e+06	1.09289	0.128154	0.129995
CHCHD4	159424	85118.4	124734	86282.2	103800	132181	124231	84942.2	113890	111289	0.977162	-0.0333296	0.904935
CHCHD6	16616.8	10863.2	13071.3	14917.3	21296.4	14847.5	17055.7	12485	13867.2	16421.1	1.18417	0.243879	0.304954
CHCHD7	175683	79714.9	110692	104850	1	155073	99398.9	126733	117735	95301.4	0.809456	-0.304975	0.594479
CHD1	355835	333637	326286	349618	329121	328170	349965	329669	341344	334231	0.979163	-0.0303796	0.443905
CHD1L	179983	179516	172105	202570	159988	175277	193974	191622	183544	180215	0.981866	-0.0264024	0.758043
CHD2	52493.7	47747	48127.6	54509.2	49545.7	49874.4	51839.1	53729.8	50719.4	51247.2	1.01041	0.0149373	0.794998
CHD3	258828	223989	180595	277404	217861	241648	261245	249789	235204	242636	1.0316	0.0448803	0.764461
CHD4	763035	767615	731856	787220	635491	758591	790155	774715	762431	739738	0.970235	-0.0435931	0.577542
CHD6	8643.24	6127.39	7913.96	7820.45	1	9187.68	7952.71	8836.52	7626.26	6494.48	0.851594	-0.231762	0.645294
CHD7	65135.2	60214.4	59003.7	68647.6	65655	60186.1	65833.3	60426.6	63250.2	63025.3	0.996443	-0.0051402	0.937345
CHD8	115807	118648	110201	123448	111799	116824	122563	114522	117026	116427	0.994883	-0.00740187	0.873236
CHD9	58118.1	47104.8	38728.7	59403.6	1	51475.8	55561.7	53494.8	50838.8	40133.3	0.789424	-0.341128	0.496999
CHDH	37777.8	68726.6	38789.4	61929.7	32499.6	69865.2	82349.6	44086.1	51805.9	57200.1	1.10412	0.142902	0.713625
CHEK1	340329	311838	300694	335616	322870	323551	337137	332776	322120	329084	1.02162	0.030858	0.530554
CHEK2	66264.7	48988.1	46145.6	60388.5	67040	65095	61293.7	66969.7	55446.7	65099.6	1.17409	0.231547	0.132236
CHERP	408981	381143	330371	405513	378137	386812	403917	382795	381502	387915	1.01681	0.0240519	0.754407
CHFR	19980.3	18585.3	19668.4	21289.7	23385.5	21988	22164.6	24726.4	19880.9	23066.1	1.16021	0.214391	0.00955036
CHI3L1	1034.4	7800.22	1	1787.14	1	1	6824.04	3278.24	2655.69	2526.07	0.951192	-0.0721914	0.958562
CHID1	174304	178924	152834	189456	151963	167104	186150	171447	173879	169166	0.972893	-0.0396473	0.66729
CHKA	65672.8	77737.1	73610.4	72039.9	70285.8	70164.2	79186.2	78162.2	72265	74449.6	1.03023	0.0429658	0.55575
CHM	257847	249810	240020	239757	237913	242167	275465	247884	246858	250857	1.0162	0.0231828	0.693366
CHML	84094	78749.8	75648.6	87486.6	77429.5	76308.6	74646.4	84187.7	81494.7	78143	0.958872	-0.0605895	0.361491
CHMP1A	412192	250467	278653	367067	125644	251461	332490	269408	327095	244751	0.748258	-0.418393	0.202614
CHMP1B	192418	150657	124453	151616	149746	134405	135112	146318	154786	141395	0.913491	-0.130538	0.417417
CHMP2A	246870	263178	260605	261732	273526	227067	257217	248064	258096	251468	0.974321	-0.0375307	0.559511
CHMP2B	86142.7	57205.1	68352.4	59156.5	25358	43439.8	55638	56507	67714.2	45235.7	0.668039	-0.581997	0.0624236
CHMP3	273015	330783	242014	288387	336431	259786	323963	305261	283550	306360	1.08045	0.111626	0.396295
CHMP4A	169142	181906	158337	169816	149594	167281	165640	181618	169800	166033	0.977815	-0.0323659	0.660871
CHMP4B	1.10807e+06	1.26987e+06	1084299	1.16206e+06	1.15312e+06	1.19208e+06	1.08317e+06	1.21841e+06	1.15608e+06	1.1617e+06	1.00486	0.00699611	0.915696
CHMP4C	26515.9	47450.1	49125.4	35673.7	54399.7	39474.8	58928.1	26840.8	39691.2	44910.9	1.13151	0.178244	0.58677
CHMP5	258244	230830	166099	197125	194961	258482	201092	294415	213074	237237	1.1134	0.154974	0.467991
CHMP6	90869.1	65072.5	65730	96962.1	48301.8	71746.9	82983	71180.4	79658.4	68553	0.860587	-0.216607	0.354661
CHMP7	89814.1	92674.2	92032.9	98776.8	95619.9	83043.1	89830.9	93518.8	93324.5	90503.2	0.969768	-0.0442878	0.437061
CHORDC1	477692	417786	330872	420110	467478	460934	405682	492053	411615	456537	1.10913	0.149434	0.260377
CHPF	25217.8	22899.1	25610.1	30041.7	30186.3	23767.8	27867.3	26871.2	25942.2	27173.2	1.04745	0.0668823	0.560924
CHPF2	19347.2	20104.4	19828.8	19671.7	24485.5	18114.9	23424.7	22482.2	19738	22126.8	1.12102	0.164817	0.185929
CHPT1	228627	196277	198775	211254	194847	191191	201503	229014	208733	204139	0.977989	-0.0321098	0.699061
CHRAC1	183239	157541	221632	187810	173994	173799	204537	148363	187555	175173	0.933981	-0.0985345	0.505681
CHST11	2.28286e+06	2.31203e+06	2.0193e+06	1.82953e+06	2.24078e+06	1.98103e+06	2.15834e+06	1.67857e+06	2.11093e+06	2.01468e+06	0.954404	-0.0673278	0.590179
CHST12	11645.1	34567.3	31631.3	32265	17003.3	1	23738	12327.1	27527.2	13267.4	0.481973	-1.05298	0.0992218
CHST14	51842.2	53200.6	54462.5	53445.4	41366.9	46870.9	66853	47820	53237.7	50727.7	0.952853	-0.0696737	0.683158
CHST2	1283.95	24527.4	7328.99	15845	1	1	11642.3	1	12246.3	2911.34	0.237732	-2.07259	0.173658
CHSY1	12701.2	13461.2	15157.2	16125.1	17383.3	15488.5	12830.7	15906.3	14361.2	15402.2	1.07249	0.100962	0.430421
CHTF18	233027	225448	221434	256449	244447	230485	262646	248721	234090	246575	1.05333	0.0749643	0.270361
CHTF8	30395	29685	23641.1	34339.4	41639.9	27760.2	32315.9	32309.5	29515.1	33506.4	1.13523	0.182981	0.320049
CHTOP	222940	218706	186616	236726	185901	212298	239178	239946	216247	219331	1.01426	0.0204263	0.859549
CHUK	595711	627071	608987	664607	689060	599380	636186	592004	624094	629158	1.00811	0.0116581	0.856968
CHURC1	92763.9	42244.8	17680	36665.8	78140.4	84520.7	41502.8	92292.6	47338.6	74114.1	1.56562	0.646731	0.225892
CIAO1	556830	464659	341774	437280	389593	528707	391568	551599	450136	465367	1.03384	0.0480085	0.814152
CIAO2A	208451	209611	189613	220269	210198	180435	218174	224664	206986	208368	1.00668	0.00959898	0.910174
CIAO2B	48020.6	40096.8	45992.2	44666.6	33214.4	38445.3	47283.9	36004.2	44694.1	38737	0.866713	-0.206373	0.151307
CIAO3	39689	45058.3	46638.1	42828	49331.5	41237.1	49271.6	44209.7	43553.4	46012.5	1.05646	0.0792409	0.365769
CIAPIN1	525736	449233	476096	493731	542496	520842	528654	511989	486199	525995	1.08185	0.113503	0.0837095
CIP2A	117094	106069	99531.6	113109	108672	102959	110846	107688	108951	107541	0.987064	-0.0187851	0.754977
CIR1	32557.6	33050.8	37178.3	27616.8	32443.7	32492.4	31335.1	37969	32600.9	33560.1	1.02942	0.041834	0.711267
CIRBP	618705	650120	774482	688925	647350	716090	740455	577397	683058	670323	0.981356	-0.0271512	0.80688
CISD1	430237	386673	382058	473424	349326	382067	483045	431415	418098	411463	0.984131	-0.0230773	0.861221
CISD2	590308	455810	605570	591147	684830	623871	649533	477641	560709	608969	1.08607	0.119117	0.435504
CIT	109165	115960	105977	119444	116962	114071	123997	117418	112636	118112	1.04861	0.0684798	0.198468
CIZ1	99851	112387	85873.6	109319	115298	110598	130382	114670	101858	117737	1.1559	0.209012	0.0789948
CKAP2	124459	127062	107835	108053	111949	113827	118857	133554	116852	119547	1.02306	0.0328903	0.71808
CKAP2L	28002.3	39214.7	27428.9	37550.3	44478.7	34124.7	32405	34128.8	33049.1	36284.3	1.09789	0.134736	0.465821
CKAP4	59625.8	58489	57480	66969.5	1	60819.2	79961	63767.3	60641	51137.1	0.843276	-0.245923	0.627355
CKAP5	807403	818585	788705	818070	756192	785920	806414	821193	808191	792430	0.980498	-0.0284132	0.367947
CKB	3.99515e+06	4.22528e+06	3.88299e+06	3.99344e+06	3539870	4.0243e+06	4200153	4.07089e+06	4.02422e+06	3.9588e+06	0.983745	-0.0236438	0.704274
CKMT1B	397481	381475	330564	289428	434419	397448	365477	389246	349737	396648	1.13413	0.181588	0.162912
CKS1B	209653	133931	131797	256107	1	158417	258548	226984	182872	160987	0.880328	-0.183887	0.75174
CLASP1	280174	287509	284232	283438	269042	270838	289294	278112	283838	276822	0.97528	-0.036112	0.227303
CLASP2	320019	309728	300765	329446	299112	318903	336559	319980	314989	318638	1.01158	0.0166165	0.724781
CLASRP	40106	46914.3	38859.2	47200.7	39274.2	43583.9	48953.2	48081.7	43270.1	44973.2	1.03936	0.0556982	0.606772
CLCC1	143982	174515	154700	146955	156561	157094	173581	155543	155038	160695	1.03649	0.0517031	0.516426
CLCN3	72769.3	75773.9	65877	60332	80336.7	65430.1	58860.5	71210.3	68688	68959.4	1.00395	0.00568858	0.963847
CLCN5	31588.8	33738.3	24103.4	26309.3	1	26947	32135.4	28843	28934.9	21981.6	0.759691	-0.396515	0.425634
CLCN7	180324	171484	169343	177380	177942	173996	178735	168274	174633	174737	1.0006	0.000858243	0.977234
CLDND1	28342.8	27583.4	21775.7	24185	1	20378.9	34355.5	23123.2	25471.7	19464.6	0.764167	-0.38804	0.46732
CLEC16A	113532	129392	127573	137732	143119	112453	122414	124303	127057	125572	0.988313	-0.0169607	0.861505
CLEC2B	1	18438	1	1	1	1	10516.7	1	4610.26	2629.92	0.57045	-0.809828	0.725018
CLIC1	14249572	13067173	13002940	11653865	13760256	13666109	12699957	13236719	1.29934e+07	1.33408e+07	1.02673	0.0380633	0.582044
CLIC2	475720	359915	353534	454011	300810	411494	475740	482337	410795	417595	1.01655	0.0236873	0.901674
CLIC4	140372	138549	119036	125873	124435	129319	130228	124434	130957	127104	0.970576	-0.0430868	0.515768
CLIC6	60756.2	46015.9	29838.2	45279.6	59832.1	45452	73356	70429.7	45472.4	62267.5	1.36935	0.453486	0.108996
CLINT1	272086	228200	260480	301990	267064	252005	294084	234735	265689	261972	0.986011	-0.020325	0.857279
CLIP1	69334.8	84644.9	75463.1	63441.4	91698.5	68478.1	73038.1	69538.2	73221	75688.2	1.03369	0.0478101	0.739326
CLIP2	22764	28182.7	16796.9	23227.9	21271.7	20655.1	19618.7	22392.6	22742.9	20984.5	0.922686	-0.116088	0.511722
CLK1	47567.1	52921.3	1	56708.2	1	55499.1	71499.9	60944.1	39299.4	46986	1.19559	0.257725	0.724479
CLK2	61495.2	58112.5	49782	68787.4	52727.3	56920.9	69159.3	55554.7	59544.3	58590.6	0.983983	-0.0232947	0.864654
CLK3	42104.7	38949.7	42193.4	46709.2	43460.9	38791.6	48605.9	48501.3	42489.3	44839.9	1.05532	0.0776855	0.443272
CLN3	44944.9	40956.2	58175.1	43471	44506	36612.5	47485.1	55848.2	46886.8	46113	0.983495	-0.0240104	0.893373
CLN6	92212	83641.9	104002	96309.3	75460.7	81862.2	100137	83118.6	94041.4	85144.5	0.905394	-0.143382	0.238615
CLN8	1	10795.1	1	1	1	1	17767.4	9945.1	2699.53	6928.62	2.5666	1.35986	0.442954
CLNS1A	1.82648e+06	1.71068e+06	1.46233e+06	1.82436e+06	1.02445e+06	1.85132e+06	1.9634e+06	1.68947e+06	1705961	1.63216e+06	0.95674	-0.0638005	0.761505
CLP1	304940	270029	238223	290916	270825	287136	296031	290606	276027	286149	1.03667	0.051959	0.550439
CLPB	450610	466076	439930	454907	412682	426119	461632	448599	452881	437258	0.965504	-0.0506459	0.265887
CLPP	141457	154754	158189	174559	112841	137990	164775	159153	157240	143690	0.913825	-0.130011	0.367063
CLPTM1	155805	189906	160483	181599	165203	161905	179613	175324	171948	170511	0.991643	-0.0121079	0.882723
CLPTM1L	270324	231861	232407	251082	169157	229646	259616	239082	246418	224375	0.910546	-0.135197	0.359441
CLPX	1.83084e+06	1.91759e+06	1969387	2.02374e+06	1840691	1.84711e+06	1.96115e+06	1857529	1.93539e+06	1.87662e+06	0.969635	-0.0444859	0.28876
CLSPN	20982.7	18507.3	18795.2	19289.1	16636.4	19481.8	20443.4	20648.5	19393.6	19302.5	0.995305	-0.00678918	0.936
CLTA	387920	157956	292562	224234	180813	277963	250913	164007	265668	218424	0.82217	-0.282492	0.441594
CLTC	7.53306e+06	7284292	6918283	7809646	6538230	7238511	7.52187e+06	7.13975e+06	7.38632e+06	7109590	0.962535	-0.0550897	0.36224
CLTCL1	2.15747e+06	2.04801e+06	1.94306e+06	1.90286e+06	2.25756e+06	2.17904e+06	1.84482e+06	2.00999e+06	2.01285e+06	2.07285e+06	1.02981	0.0423774	0.602992
CLUH	653155	675000	642693	674969	655937	647325	658482	676681	661454	659606	0.997206	-0.0040361	0.862368
CLYBL	5621.14	9271.09	6425	8689.51	2123.53	6826.35	8312.25	9557.2	7501.68	6704.83	0.893777	-0.162013	0.685661
CMAS	846341	727505	720628	762420	732770	763107	783827	822261	764223	775491	1.01474	0.0211159	0.756385
CMBL	1.34396e+06	1.29299e+06	1.1596e+06	1.20934e+06	1.11108e+06	1.26414e+06	1.2842e+06	1.2513e+06	1.25147e+06	1.22768e+06	0.980987	-0.0276938	0.691586
CMC1	328242	225215	180794	285613	282165	319331	267272	214926	254966	270923	1.06259	0.0875808	0.699143
CMC2	96271.3	120978	125046	116412	110950	53071.1	81972.6	132170	114677	94540.7	0.82441	-0.278565	0.337571
CMIP	159177	151907	116182	155122	131960	163630	160023	163481	145597	154774	1.06303	0.0881803	0.493083
CMPK1	1.58733e+06	1.39223e+06	1.5589e+06	1.69848e+06	1485791	1.41691e+06	1.72819e+06	1519266	1.55924e+06	1.53754e+06	0.986086	-0.0202148	0.821794
CMPK2	502780	470114	448529	468902	428218	482355	434567	554386	472581	474882	1.00487	0.00700552	0.944897
CMSS1	157254	158656	143240	165209	150968	158054	154355	165064	156090	157110	1.00654	0.00939981	0.8604
CMTR1	90560.5	85912.8	73781.4	96633.9	88270.7	88305.7	98058.2	99052.4	86722.2	93421.7	1.07725	0.107358	0.291382
CMTR2	25574.4	28903.4	24341.9	24603.6	32882.6	24101.5	24443	25400.5	25855.8	26706.9	1.03292	0.0467226	0.731348
CNBP	159254	13509.3	15422.1	7149.2	125032	135826	8427.85	105706	48833.6	93748	1.91975	0.940915	0.377693
CNDP2	3.04192e+06	3252897	3168560	3176714	2.66754e+06	3.03936e+06	3.20175e+06	3.1175e+06	3.16002e+06	3.00654e+06	0.951429	-0.0718322	0.291897
CNIH4	119873	216551	413925	94251.4	184926	144615	165070	176827	211150	167859	0.794976	-0.331017	0.594123
CNN1	29286.1	27388.2	37123.4	27800.6	72124.7	26075	34188.8	24740.6	30399.6	39282.3	1.2922	0.369829	0.487786
CNN2	968023	459107	506274	749279	297081	704316	800127	705587	670671	626778	0.934554	-0.09765	0.796298
CNN3	12046.5	10681.2	1	18963.8	1	11649.6	22519.9	15205.3	10423.1	12343.9	1.18428	0.244015	0.764427
CNNM3	40230	36622.7	40873	44767.6	42443.6	37960.1	43338.7	39653.5	40623.3	40849	1.00556	0.00799294	0.917412
CNNM4	10458.8	9777.85	12859.9	10904.2	14518.6	10155.1	13733.4	1	11000.2	9602.03	0.872897	-0.196116	0.706905
CNOT1	760519	752921	690308	771066	694429	724602	749498	723441	743704	722993	0.972152	-0.0407468	0.377271
CNOT10	144085	135345	137279	137461	127191	134936	141223	130650	138543	133500	0.963604	-0.0534881	0.216721
CNOT11	132917	133112	114808	132174	116425	113924	139526	114965	128253	121210	0.945085	-0.0814833	0.392575
CNOT2	198378	195314	142700	212033	89082.6	195293	217140	202427	187106	175985	0.940564	-0.0884025	0.751564
CNOT3	196095	191843	174831	207648	185586	177131	202927	186216	192604	187965	0.975913	-0.0351759	0.613332
CNOT4	133139	142090	127329	135658	142248	131487	140132	145845	134554	139928	1.03994	0.0564992	0.25985
CNOT6L	68171.4	64357.8	68498.1	71237.1	58848.7	67422.7	77589.1	57145.9	68066.1	65251.6	0.958651	-0.0609231	0.599895
CNOT7	110498	110202	97083.1	103770	87561.4	96446.9	115943	98210.1	105388	99540.4	0.944511	-0.0823598	0.428538
CNOT8	56811.1	59683.1	62176.1	60594.5	45397.8	50610.7	61702.8	56866.1	59816.2	53644.3	0.896819	-0.15711	0.18215
CNOT9	218568	182376	174776	205916	203945	209657	202562	179119	195409	198821	1.01746	0.0249724	0.79062
CNP	453392	430268	423350	472281	405600	408667	473127	471450	444823	439711	0.988508	-0.0166748	0.824854
CNPY2	193089	142813	157099	160761	142304	157883	209752	130956	163440	160224	0.980319	-0.0286762	0.880861
CNPY3	165886	157766	134443	147630	154925	160697	136602	189253	151431	160369	1.05902	0.0827317	0.517561
CNPY4	1	1	1	6081.97	1	4480.01	1	1	1521.24	1120.75	0.736735	-0.440782	0.83964
CNRIP1	121098	234648	263474	269044	246628	245758	261261	232473	222066	246530	1.11017	0.150775	0.532202
CNST	49564.5	28418.6	22979.2	31391.5	40508.5	32964.6	38864.2	42449.4	33088.5	38696.7	1.16949	0.225881	0.414191
CNTNAP4	392475	579264	1	604855	1	511483	1	1	394149	127871	0.324424	-1.62405	0.209624
COA1	51543.4	55754.8	48663.5	53234.2	47167.2	44956.4	61027.1	52012.8	52299	51290.9	0.980724	-0.0280805	0.806944
COA3	177504	143071	164277	213786	242274	154462	200582	191316	174660	197158	1.12881	0.174809	0.374007
COA6	94589.4	78836.6	80035	76250.9	87004.8	75910.9	84381.5	131055	82428	94588.1	1.14752	0.198524	0.408878
COA7	278246	142115	165108	147423	195572	222222	178323	224004	183223	205030	1.11902	0.162236	0.557685
COASY	1.78463e+06	1.7244e+06	1.75891e+06	1.81637e+06	1.84791e+06	1.79169e+06	1.87735e+06	1.81474e+06	1.77108e+06	1.83292e+06	1.03492	0.0495211	0.0624239
COBLL1	1353.86	376.932	1	843.398	1274.96	1335.91	2015.68	1987.95	643.796	1653.62	2.56855	1.36095	0.0337231
COG1	45462.8	45365.9	42173.8	52840.7	45098.2	43199.5	53101.8	43875.1	46460.8	46318.6	0.99694	-0.00442095	0.966227
COG2	88648.4	106858	90397.6	100448	108893	95670.9	103721	104913	96588	103299	1.06948	0.0969145	0.245181
COG3	63382.6	71909.2	58770.2	73566.6	64441.9	60467.8	77546	68220.8	66907.1	67669.1	1.01139	0.0163377	0.885405
COG4	63749.1	66645.9	64747.8	65213.1	65945.9	60425	67933.5	70102.9	65089	66101.8	1.01556	0.0222762	0.666761
COG5	99128.6	109084	100318	113000	111356	103674	107672	105962	105383	107166	1.01692	0.0242081	0.656743
COG6	60965.5	68261.2	67771.9	73535.9	60625.6	64256.1	66585.6	68882.6	67633.6	65087.5	0.962354	-0.0553605	0.449833
COG7	63330.2	60324.1	58971	65702.1	64703.3	58442.5	71815.7	65970.4	62081.9	65233	1.05076	0.0714295	0.363595
COG8	72618.2	76684.4	76637.1	77718.4	72361.5	68648.7	76270.5	71116.5	75914.5	72099.3	0.949743	-0.0743905	0.103286
COIL	171133	176363	173773	177884	181468	160509	164312	165195	174788	167871	0.960426	-0.058254	0.236393
COL18A1	198533	155837	149500	173407	122445	120925	145701	209996	169319	149767	0.884522	-0.17703	0.448196
COLGALT1	823463	825331	755766	908231	722554	780539	872834	843361	828198	804822	0.971775	-0.0413056	0.627958
COLGALT2	70069.8	84960.8	81742.2	104973	98112.8	91275.5	91876.8	74692.1	85436.5	88989.3	1.04158	0.0587791	0.702648
COMMD1	16887.9	17423.3	16906.4	20262.8	24359.8	15611	19268.2	14406.6	17870.1	18411.4	1.03029	0.0430511	0.831697
COMMD10	40368.1	67347.3	53433	48323.7	64820.5	34576.3	54204.9	44157.4	52368	49439.8	0.944083	-0.0830145	0.746178
COMMD2	87043.1	85444.9	82922.5	89480.2	88395.7	80619.9	103042	86220.4	86222.7	89569.6	1.03882	0.0549416	0.54293
COMMD3	13706.7	14330	14178.6	13529.7	21392	13554.7	15989.7	16720.7	13936.3	16914.3	1.21369	0.279399	0.166411
COMMD4	60221.4	63976.4	58947.7	60212	68307.7	56831.5	59921.4	63327.5	60839.4	62097	1.02067	0.0295188	0.66356
COMMD5	31271	44743.1	35075.4	28905.7	40138.9	33161.3	31522.3	40635.1	34998.8	36364.4	1.03902	0.0552207	0.75789
COMMD7	47978.6	59765.3	54742	40145.7	49816.4	46538.4	52049.3	38389.6	50657.9	46698.4	0.921839	-0.117414	0.478565
COMMD9	8165.99	8936.69	7855.34	7766.7	4372.34	7736.6	9780.53	7326.76	8181.18	7304.06	0.892788	-0.16361	0.494569
COMT	1.37964e+06	1.09638e+06	934491	1.27279e+06	1.01676e+06	1.18733e+06	1.18529e+06	1.37093e+06	1.17082e+06	1.19008e+06	1.01644	0.0235312	0.880072
COMTD1	68088.5	64319.9	41739.6	63444.6	55369.5	69985.8	59977.6	78865.3	59398.1	66049.6	1.11198	0.153132	0.435392
COP1	18838.1	20417.3	17430.7	17285.3	1	15062.8	19832.3	18439.7	18492.9	13333.9	0.721031	-0.471866	0.341374
COPA	2.14919e+06	2.00375e+06	1.97168e+06	2.10401e+06	1.96577e+06	2.0647e+06	2.04389e+06	2018346	2.05716e+06	2.02318e+06	0.983483	-0.0240282	0.504093
COPB1	1.49489e+06	1.51767e+06	1.33441e+06	1.51667e+06	1.23398e+06	1.4469e+06	1507454	1.44435e+06	1.46591e+06	1.40817e+06	0.960613	-0.0579732	0.469575
COPB2	1.67462e+06	1.64776e+06	1504108	1.6309e+06	1.42264e+06	1.54507e+06	1.74474e+06	1.62391e+06	1.61435e+06	1.58409e+06	0.981257	-0.0272972	0.713418
COPE	624157	678387	588120	712449	484202	584964	649778	649027	650778	591993	0.909669	-0.136586	0.26987
COPG1	925227	919518	831332	930367	838268	905008	890768	905466	901611	884878	0.981441	-0.027027	0.580129
COPG2	781284	743412	675628	781720	699521	734869	719673	750938	745511	726250	0.974165	-0.0377625	0.51787
COPS2	286756	282092	263251	279010	268277	269263	291395	271643	277777	275144	0.990522	-0.0137386	0.736664
COPS3	888000	829164	802009	826809	651119	838120	831928	887823	836496	802248	0.959058	-0.0603106	0.569631
COPS4	591747	581114	514102	568846	551390	577814	572695	575232	563952	569283	1.00945	0.0135723	0.786253
COPS5	336261	343112	290783	368725	181825	316656	376368	339730	334720	303645	0.90716	-0.140571	0.532761
COPS6	665999	642499	585096	664434	505468	628364	683986	634155	639507	612993	0.95854	-0.061089	0.562761
COPS7A	52196.5	56638	56052	55276	48060.1	43028.6	56387.8	51177.5	55040.6	49663.5	0.902306	-0.148311	0.149471
COPS7B	350758	325010	268279	309593	325686	296579	341509	311085	313410	318715	1.01693	0.0242155	0.799952
COPS8	210351	231642	178284	250969	126565	181626	230956	237150	217812	194074	0.89102	-0.16647	0.465799
COPZ1	1.16615e+06	1.3222e+06	1.40373e+06	1.31357e+06	1.36324e+06	1.15407e+06	1.27919e+06	1.30475e+06	1.30141e+06	1.27531e+06	0.979945	-0.029228	0.707373
COQ10B	19364.6	20025.8	1	34808.5	1	25571.4	39465.6	18502.9	18550	20885.2	1.12589	0.171066	0.83728
COQ3	27280.8	21909.2	15519.1	23776.8	30901.9	24317	20237.4	20044.4	22121.5	23875.2	1.07928	0.110063	0.63806
COQ5	51274.9	62417.8	59664.7	60724.8	60252.9	61713.6	61261.6	60185.7	58520.5	60853.5	1.03987	0.0563971	0.418351
COQ6	423239	471719	452201	565898	492111	504487	546041	524750	478264	516847	1.08067	0.111929	0.310039
COQ7	84797.9	79694.1	70026.8	75733.8	37964	69869	97201.5	79306	77563.1	71085.1	0.916481	-0.125823	0.643918
COQ8A	153225	139608	130970	156130	113672	149093	148253	143241	144983	138565	0.95573	-0.0653249	0.557244
COQ8B	23645.1	19837.3	16612.8	27140.9	27031.1	23001.3	26994.1	25252.7	21809	25569.8	1.17244	0.229517	0.203205
COQ9	20444.7	14499.1	16994.6	18324.9	1	13247.9	23350.6	18608.9	17565.8	13802.1	0.785734	-0.347887	0.515776
CORO1A	341592	331556	353387	330167	345428	364345	316239	326066	339176	338019	0.996591	-0.00492598	0.927117
CORO1B	1.49605e+06	1.33897e+06	1.1483e+06	1.51303e+06	820180	1.42015e+06	1.44061e+06	1.4617e+06	1.37409e+06	1.28566e+06	0.935648	-0.0959621	0.640224
CORO1C	2.09704e+06	2.05161e+06	1.88884e+06	2.26359e+06	2097744	2.15527e+06	2.0568e+06	2.31194e+06	2.07527e+06	2.15544e+06	1.03863	0.0546824	0.435058
CORO2A	73514.9	94039.5	72010.9	90873.1	57373.5	87861.6	91963.3	74151.2	82609.6	77837.4	0.942233	-0.0858448	0.641346
CORO7	480517	447601	450143	477610	451058	476540	463884	486008	463968	469372	1.01165	0.0167089	0.657808
COTL1	646036	570977	608884	546812	542422	559749	595422	574017	593177	567903	0.957391	-0.0628192	0.354311
COX11	48961	47820.8	39585.6	51411.5	48128.1	44220	56858	49540.7	46944.7	49686.7	1.05841	0.0818967	0.484639
COX15	69227.5	68890.5	62537.2	70599.4	57666.9	55395.2	72852.6	60387.7	67813.7	61575.6	0.908011	-0.139218	0.215946
COX17	4792.52	1	1	1	1	16287.2	21391.2	21846	1198.88	14881.4	12.4127	3.63375	0.0720864
COX18	21974	25428.2	27096.2	22763.1	1	26660.2	24438.4	28171	24315.4	19817.7	0.815025	-0.295083	0.550494
COX19	73292.7	71046.4	60817.9	1	50051.3	67229.6	1	83158.5	51289.5	50110.1	0.977005	-0.0335626	0.963887
COX20	197944	254086	237787	267912	215792	229360	233729	242240	239432	230280	0.961776	-0.0562265	0.60204
COX4I1	1.9594e+06	1.85477e+06	2.00469e+06	1.96788e+06	1.90914e+06	1.73082e+06	2159696	1.65203e+06	1.94668e+06	1.86292e+06	0.956972	-0.063451	0.519387
COX5A	57524.2	56669.6	44875.7	44279	1	51608.5	46028.5	48300	50837.1	36484.5	0.717675	-0.478598	0.330764
COX5B	169885	92328.5	85646.3	101305	169702	171222	101182	210470	112291	163144	1.45287	0.538902	0.141132
COX6A1	62393.5	55313.2	40501.1	70142.3	11291.6	42673.7	54755.4	44784.7	57087.5	38376.4	0.672237	-0.572957	0.156597
COX6B1	134654	83803.9	58877.2	77101.7	1	116338	85093.7	151266	88609.1	88174.6	0.995097	-0.00709129	0.990944
COX6C	816844	505099	526259	792182	570669	550934	746069	616215	660096	620972	0.940729	-0.0881482	0.697573
COX7A2	1.20476e+06	1.31096e+06	1.30531e+06	1.21517e+06	1.15559e+06	1.11476e+06	1.29915e+06	1.20312e+06	1.25905e+06	1.19316e+06	0.947665	-0.0775508	0.230551
COX7A2L	131570	136017	120050	134108	127588	121913	160165	147889	130436	139389	1.06863	0.0957683	0.403801
COX7B	110654	78896.9	78410.1	74683.1	66330.2	53468.9	90208.2	51531	85661.1	65384.6	0.763294	-0.38969	0.148549
CPD	114354	132813	114481	130206	141167	118290	149864	124083	122963	133351	1.08448	0.117	0.291309
CPEB4	28969.1	40009.8	32703.8	44727.3	12174.7	38577	43572	47480.6	36602.5	35451.1	0.968543	-0.0461125	0.901159
CPM	1	1	1	42423.9	1	1	1	24170.7	10606.7	6043.44	0.569774	-0.811538	0.724581
CPNE1	712382	680173	672799	738575	633193	683519	700718	687423	700982	676213	0.964666	-0.0518991	0.287319
CPNE2	124172	160738	143511	142463	178075	137981	129228	139387	142721	146168	1.02415	0.0344264	0.803665
CPNE3	520072	467292	443938	533924	575853	534842	465655	558630	491306	533745	1.08638	0.119527	0.237179
CPNE7	28824.7	14891.7	17196.2	20583.7	24581.2	22314.8	34046.1	43727.3	20374.1	31167.3	1.52975	0.6133	0.120018
CPNE8	201868	188389	203696	195475	184633	204884	229056	226322	197357	211224	1.07026	0.0979641	0.279779
CPOX	1.33147e+06	1.08899e+06	1.01291e+06	1.2065e+06	1.11183e+06	1.21155e+06	1.10808e+06	1355886	1.15997e+06	1.19683e+06	1.03178	0.0451401	0.699125
CPPED1	515754	511252	466679	513959	453065	502198	498930	486727	501911	485230	0.966765	-0.0487628	0.344955
CPQ	82431.1	83025.3	71266.1	79215.2	87324.3	74761.1	86984.7	81854.3	78984.4	82731.1	1.04744	0.0668615	0.384518
CPS1	18195.7	13629.3	12184	12697.6	23451.1	12649.1	17805.3	14962.8	14176.6	17217.1	1.21447	0.280326	0.313369
CPSF1	611836	637168	559454	670895	621833	610251	668378	644573	619838	636259	1.02649	0.0377215	0.568429
CPSF2	905974	912503	848672	956372	926331	902462	929689	934857	905880	923335	1.01927	0.0275335	0.498502
CPSF3	551496	545483	498911	567446	478938	514396	548891	557670	540834	524974	0.970675	-0.0429401	0.521119
CPSF4	132160	84384	66273.3	85409.7	84290.9	118309	104313	127868	92056.8	108695	1.18074	0.239695	0.369516
CPSF6	1.02887e+06	1.01818e+06	910518	1.05852e+06	977072	1.00438e+06	1.06375e+06	1.14607e+06	1.00402e+06	1.04782e+06	1.04362	0.0615986	0.410469
CPSF7	1.22585e+06	1.32374e+06	1.24775e+06	1325573	1.1944e+06	1.18345e+06	1.39989e+06	1.26962e+06	1.28073e+06	1.26184e+06	0.985253	-0.0214345	0.751519
CPT1A	179952	158006	149157	169681	152579	164794	176582	170561	164199	166129	1.01175	0.0168599	0.827456
CPT2	323543	300626	299254	320625	280515	299810	318675	319419	311012	304605	0.979399	-0.0300319	0.591755
CPTP	35447.5	37406.7	22373.1	35472.8	13369.8	29318	34854.2	27296.9	32675	26209.7	0.802134	-0.318085	0.305509
CR1	10856.3	9905.73	1	4367.75	16509.4	16128.5	7440.4	9946.02	6282.7	12506.1	1.99055	0.99317	0.117364
CRACR2A	15958.7	14167.2	16085.9	20298.7	20914.3	15839.5	18746.7	19296.9	16627.6	18699.4	1.12459	0.169405	0.264464
CRADD	94324.1	85196.4	62136.1	96788	54230.7	84144.4	101845	98854.4	84611.2	84768.7	1.00186	0.00268347	0.991071
CRAT	22046.3	20019.7	19716.7	22734.6	26863.8	21722.4	20328.4	23800.7	21129.3	23178.8	1.097	0.133563	0.262759
CRBN	47472.9	29259.7	35678.2	38590.5	42018.2	35127	36292.9	36809.9	37750.3	37562	0.995011	-0.00721523	0.965407
CREB1	335884	405519	306292	379025	440751	341999	331544	388424	356680	375680	1.05327	0.0748725	0.589694
CREBBP	11970.6	12481	11571.2	13082.2	11427.1	13066.6	14255.6	12805.8	12276.3	12888.8	1.04989	0.0702429	0.402325
CREG1	114334	138649	95838.3	168913	40268.6	115226	159557	166005	129434	120264	0.929156	-0.106008	0.793003
CRELD2	15813.6	2280.68	330.22	1	6387.87	6083.48	1	7988.47	4606.38	5115.21	1.11046	0.15116	0.908184
CRIP1	15887.9	1	1	1	1	14190.3	1	28425.2	3972.73	10654.4	2.68187	1.42324	0.436296
CRIPT	274505	49487.3	55201.2	63975.1	131349	165131	108970	201924	110792	151844	1.37053	0.45473	0.521966
CRK	166767	170417	171060	172839	157328	159549	183349	165086	170271	166328	0.976844	-0.0337992	0.556765
CRKL	1.5034e+06	1270053	1.48443e+06	1.62623e+06	1.29201e+06	1.41104e+06	1646974	1.33969e+06	1.47103e+06	1.42243e+06	0.966962	-0.0484692	0.668727
CRLF3	89221.4	79276.1	78012.8	82926.8	77727.5	79799	82051.9	88506.6	82359.3	82021.3	0.995896	-0.00593265	0.924749
CRNKL1	126200	110932	112469	120374	111055	107356	120058	116298	117494	113691	0.967638	-0.0474609	0.435623
CRPPA	13067	10624.3	13715.8	13604.6	18016.8	11814.6	14887.7	10153.8	12752.9	13718.2	1.07569	0.105268	0.63478
CRTAP	103593	117429	97751.2	123983	96289.8	93167.2	115996	105944	110689	102849	0.929172	-0.105983	0.363244
CRTC1	24178.6	22009.7	27100.7	30392.3	22923.4	23876.1	31202.2	23675	25920.3	25419.2	0.980666	-0.0281666	0.856718
CRTC2	22084.8	17836.1	16283	19985.8	26345.9	18029.5	24286.5	13251.4	19047.4	20478.3	1.07512	0.104501	0.681817
CRYAB	12559	19612.5	12105.3	17816.8	1	14707.5	28447	17282.5	15523.4	15109.5	0.973338	-0.0389869	0.94988
CRYBG1	54130.2	51830.3	51826.9	49095.9	59356	51161.4	45378.8	50497	51720.8	51598.3	0.997631	-0.00342149	0.970186
CRYM	36341.8	55921.9	43535	40573.7	38125	44699.2	44656.1	34903.5	44093.1	40596	0.920688	-0.119216	0.505942
CRYZ	950984	924119	932631	906769	920783	894218	918536	894984	928626	907131	0.976853	-0.0337867	0.118671
CRYZL1	1.36318e+06	1453680	1.38925e+06	1.4017e+06	1.19254e+06	1293198	1.34574e+06	1.31952e+06	1.40195e+06	1.28775e+06	0.91854	-0.122586	0.0333762
CS	3.54005e+06	3.56148e+06	3.41403e+06	3.78886e+06	3.22751e+06	3.43673e+06	3747820	3.51239e+06	3.57611e+06	3.48111e+06	0.973437	-0.03884	0.503579
CSDE1	1.18027e+06	1.25561e+06	1.18845e+06	1.23993e+06	1.1644e+06	1175099	1.1749e+06	1.2086e+06	1.21606e+06	1.18075e+06	0.97096	-0.0425169	0.159916
CSE1L	2205044	2.24045e+06	2.15554e+06	1.981e+06	2.17258e+06	2178048	2052338	1.94521e+06	2.14551e+06	2.08704e+06	0.97275	-0.0398588	0.492049
CSK	678927	618139	598546	701009	551146	644446	674663	679797	649155	637513	0.982065	-0.026109	0.772877
CSNK1A1	269746	250919	221105	276278	222122	241515	272858	250781	254512	246819	0.969773	-0.0442805	0.652947
CSNK1D	100204	102825	91798	96677.8	105359	103672	104293	108125	97876.1	105362	1.07649	0.106331	0.0441682
CSNK1E	43237.4	42123.2	35822.5	47983.9	40224.5	42119.4	43678.7	43837.7	42291.7	42465.1	1.0041	0.00590134	0.951077
CSNK1G1	24565.1	19976.5	21375.7	22377.3	16982.3	17972	23364.1	27218.6	22073.6	21384.2	0.968768	-0.045777	0.803027
CSNK1G2	10499.8	9581.67	1	11886.6	1	8678.7	16770.6	10316.4	7992.28	8941.68	1.11879	0.16194	0.836261
CSNK1G3	30197.3	31703.8	24566.3	33593.9	28976.4	29903.1	32642.7	34926.4	30015.3	31612.2	1.0532	0.0747809	0.528154
CSNK2A1	620647	646927	630725	661391	607608	591858	645946	612817	639922	614557	0.960362	-0.0583496	0.133166
CSNK2A2	558869	572516	539375	623745	489634	516498	584131	568978	573626	539810	0.941049	-0.0876578	0.282736
CSNK2B	934858	846669	675804	798768	613505	863938	868290	949358	814025	823773	1.01197	0.0171735	0.918147
CSRP1	307025	83302.2	111607	105518	277369	313424	86082.8	266939	151863	235954	1.55373	0.635732	0.292284
CST3	67705.2	77845.6	58355.4	90434.6	29089.2	46025.8	71485.3	71990.2	73585.2	54647.6	0.742644	-0.429257	0.188639
CST5	8323.39	15150.8	27955.5	46789.2	1	28689	66749.1	31636.8	24554.7	31769	1.2938	0.371618	0.672323
CSTB	420919	431781	510495	443776	399130	395994	480598	422413	451743	424534	0.939769	-0.0896218	0.37023
CSTF1	241876	225681	204716	249569	214696	234863	232118	247944	230460	232405	1.00844	0.0121231	0.877726
CSTF2	145742	90172.3	134448	168365	95850	136091	136877	93654.3	134682	115618	0.858453	-0.220188	0.388684
CSTF2T	190139	142460	165333	154190	171708	159409	177922	150292	163031	164833	1.01105	0.015861	0.885648
CSTF3	721657	767544	746814	751972	750717	736805	757141	722187	746997	741712	0.992926	-0.0102422	0.682894
CT45A10;CT45A8;CT45A9;CT45A2	66439.9	59036.9	59801.9	62709.9	62062.2	49644.2	74885.6	58561.1	61997.2	61288.3	0.988566	-0.0165914	0.904211
CTBP1	915080	915101	932046	988425	814393	930107	921516	991954	937663	914492	0.975289	-0.0360979	0.598325
CTBS	13610.2	18360.4	10216.8	14643.1	11619.9	14952.2	18642.8	17375	14207.6	15647.5	1.10134	0.139266	0.551131
CTCF	44595.7	31666.7	30941.4	29145.4	38357.2	40813.7	26937.5	38568.9	34087.3	36169.3	1.06108	0.0855318	0.67516
CTDP1	324734	300755	309989	314128	270735	299974	300926	316821	312401	297114	0.951064	-0.0723854	0.222776
CTDSP1	30810.1	21217.6	35231.6	24098.1	18438.4	22949.2	23762.6	18600.2	27839.4	20937.6	0.752085	-0.411032	0.115868
CTDSPL2	82400.5	105537	96589.5	84263.7	86866.8	81226.3	85738.4	90001.1	92197.7	85958.1	0.932324	-0.101097	0.343599
CTH	430345	398137	318558	438601	371193	311164	341165	366707	396410	347557	0.876761	-0.189745	0.179402
CTIF	17148.6	23878.9	15788.6	21473	19027.6	18529.4	22496.7	22419.1	19572.3	20618.2	1.05344	0.0751057	0.649794
CTNNA1	148640	138008	118272	135300	143223	134331	137662	142140	135055	139339	1.03172	0.0450519	0.556109
CTNNAL1	1.36406e+06	923681	1.10378e+06	1.08477e+06	1539132	1.08477e+06	1.52136e+06	1.36515e+06	1.11907e+06	1.3776e+06	1.23102	0.299854	0.11349
CTNNB1	11760.1	1	1	15054.4	1	14190.2	21554.3	10311.6	6704.12	11514.3	1.71749	0.780304	0.45138
CTNNBL1	553565	514436	389786	549564	512744	485514	535858	567270	501838	525347	1.04684	0.0660475	0.605253
CTNND1	106085	109580	91815.4	112260	93572.1	94773.9	110573	109768	104935	102172	0.973666	-0.0385016	0.685172
CTPS1	1.354e+06	1.16721e+06	1.10089e+06	1.17372e+06	1.11947e+06	1.2018e+06	1102550	1.24538e+06	1.19895e+06	1.1673e+06	0.973598	-0.0386026	0.641432
CTPS2	214993	207665	194638	228783	220107	203002	219824	207483	211520	212604	1.00513	0.00737498	0.901813
CTR9	212033	156917	156493	185723	152324	178314	184752	184897	177792	175072	0.984702	-0.0222403	0.866926
CTSA	130376	102194	53688.2	128415	89851.4	102895	102584	113886	103668	102304	0.986839	-0.019114	0.945335
CTSB	1.37244e+06	1.19463e+06	1.08296e+06	1.16387e+06	1.17608e+06	1.29945e+06	1.14022e+06	1.40911e+06	1.20347e+06	1.25622e+06	1.04382	0.0618787	0.564516
CTSC	597779	528180	429559	595124	507214	564077	561078	575067	537660	551859	1.02641	0.0376043	0.754461
CTSD	1.57483e+06	1.49462e+06	1.55027e+06	1.58851e+06	1.31395e+06	1.43166e+06	1.4922e+06	1.63989e+06	1.55206e+06	1.46943e+06	0.94676	-0.078929	0.316037
CTSG	1	8806.73	1	1	1	1	8428.36	1	2202.43	2107.84	0.957051	-0.0633326	0.976244
CTSH	43761.5	100762	95826.3	105282	108602	105563	108204	118844	86407.8	110303	1.27654	0.352243	0.194176
CTSL	286816	290903	227380	256515	298409	270881	287278	303132	265403	289925	1.09239	0.127493	0.205117
CTSS	280316	229774	241429	279669	200765	261954	246816	273130	257797	245666	0.952944	-0.0695363	0.577623
CTSZ	694813	477151	496117	413784	462853	529450	451090	665028	520466	527105	1.01276	0.0182863	0.935134
CTTN	94605.1	256575	321870	270549	288881	191390	308764	95453.9	235900	221122	0.937357	-0.0933294	0.838617
CTU1	305473	280656	266259	308123	301369	327396	292286	304836	290128	306472	1.05633	0.079065	0.244045
CTU2	229416	217372	186743	223464	165980	216267	217137	235202	214249	208646	0.973851	-0.0382269	0.763489
CUL1	451521	439583	431721	464877	445585	444426	469952	430838	446925	447700	1.00173	0.00249977	0.945606
CUL2	311058	290646	262667	303729	249693	275230	291359	295216	292025	277874	0.951543	-0.0716591	0.377509
CUL3	479093	485447	467286	471077	456137	469937	480889	462461	475726	467356	0.982406	-0.025609	0.260978
CUL4A	87770.9	83890.3	69209.8	90384.6	80618	81554.5	84570.2	84218.3	82813.9	82740.3	0.999111	-0.00128329	0.988716
CUL4B	1.01577e+06	1.03045e+06	1.02051e+06	992313	1.04972e+06	1.0322e+06	1.02954e+06	1.00589e+06	1.01476e+06	1.02934e+06	1.01437	0.0205772	0.274248
CUL5	260728	261482	255575	256990	246122	240908	264926	251567	258694	250881	0.9698	-0.0442416	0.229138
CUL7	14253.1	11149.2	5855.12	10657.3	10222.6	10380	10328.9	10189.1	10478.7	10280.2	0.981054	-0.0275961	0.916125
CUSTOS	155603	175985	161436	161318	163673	157138	164455	192751	163586	169504	1.03618	0.0512719	0.543486
CUTA	123180	151380	125098	163437	1	75007.6	97892.4	220285	140774	98296.5	0.698259	-0.518167	0.425593
CUTC	43417.4	33683.2	25922	33377.4	41727.7	44013.5	30680.9	47168.9	34100	40897.7	1.19935	0.262249	0.228549
CUX1	35522	33792.5	35623.7	35696.5	35773.2	34459.5	36918.4	30866.6	35158.7	34504.4	0.981391	-0.0270995	0.664094
CUX2	174551	151717	137047	151238	58402	143532	231004	178258	153638	152799	0.994538	-0.00790148	0.983246
CWC15	262757	150894	216110	230109	198007	221336	236009	140938	214967	199073	0.92606	-0.110823	0.631417
CWC22	216331	220562	203487	223323	205973	200356	224656	198781	215926	207441	0.960707	-0.0578311	0.298043
CWC25	99438.9	121502	96181.5	102156	96403.6	92770.6	105263	99456.3	104820	98473.3	0.939455	-0.0901036	0.366231
CWC27	245181	271944	248115	249845	231695	239763	264881	303069	253771	259852	1.02396	0.0341612	0.74184
CWF19L1	300406	289729	253876	292904	272187	291431	269233	309490	284229	285585	1.00477	0.00686991	0.925816
CWF19L2	25566.5	27318.9	23389.7	30114.2	27745.3	24811.7	28554.6	29516.5	26597.3	27657	1.03984	0.0563661	0.568513
CXorf38	37494.5	38383.2	45001.6	33406.9	49178.9	34166.5	35915.7	40449.5	38571.6	39927.7	1.03516	0.0498515	0.754735
CXXC1	82900.8	88377.1	73008.3	88779.6	93471.3	83022.5	80581.1	97156.9	83266.4	88558	1.06355	0.0888869	0.367969
CXXC5	83654.4	71439.6	64145.5	55277	79253.4	55563.4	69959.3	81587	68629.1	71590.8	1.04316	0.0609536	0.736977
CYB561D2	146524	158352	180875	177927	190057	156131	168511	162560	165919	169315	1.02046	0.0292256	0.768087
CYB5B	55503.2	67080.4	84363.4	63380.8	41473.6	53194.8	71033.5	46094.1	67581.9	52949	0.783479	-0.352034	0.151571
CYB5R1	480108	522458	435990	526534	439011	515483	545095	572898	491273	518122	1.05465	0.0767683	0.484193
CYB5R2	74009.5	59822.6	56729.7	70504.1	59515.1	59781.5	63711.6	50700.6	65266.5	58427.2	0.89521	-0.159702	0.225423
CYB5R3	1.21876e+06	1.29309e+06	1079306	1.21431e+06	994547	1.30554e+06	1.18235e+06	1.27593e+06	1.20137e+06	1.18959e+06	0.990199	-0.0142091	0.892716
CYB5R4	286468	303126	273790	288426	283730	258950	299588	263281	287952	276387	0.959837	-0.0591389	0.347753
CYBA	112029	100373	94789.1	118963	113245	115390	118111	109815	106539	114140	1.07135	0.0994325	0.264097
CYBB	41118.5	24826.3	1	87894.6	1	1	1	28043.4	38460.1	7011.6	0.182308	-2.45555	0.190344
CYBC1	47330.2	52468.2	45310.7	43857.4	53406	45197.8	52098.6	33897.7	47241.6	46150	0.976894	-0.0337267	0.832663
CYC1	825346	686371	693612	756340	838750	845024	870407	709318	740417	815875	1.10191	0.140009	0.171686
CYCS	3.51682e+06	2.84608e+06	3.12013e+06	3.19327e+06	3375412	3.57535e+06	3.83518e+06	3628484	3.16908e+06	3.60361e+06	1.13712	0.185379	0.045619
CYFIP1	538832	513443	500453	548191	511881	507178	531479	513317	525230	515964	0.982358	-0.0256797	0.489165
CYLD	47267.5	1	1	30322.5	1	1	11968.3	14928.4	19398	6724.67	0.346668	-1.52837	0.368092
CYP20A1	38967.8	39592.4	36167.4	38971.6	39665.8	35970.4	38877.7	39766.5	38424.8	38570.1	1.00378	0.00544645	0.905602
CYP24A1	163085	1	121666	1	36696	1	1	1	71188.5	9174.74	0.12888	-2.9559	0.236904
CYP27A1	1	12.3957	1	2305.5	1	31488.3	1	1	579.975	7872.84	13.5744	3.76282	0.422988
CYP2S1	16140.6	19638.8	15822.4	16951.9	17831.7	17297.1	16200.9	16011	17138.4	16835.2	0.982306	-0.0257558	0.768848
CYP51A1	162181	152322	152736	177883	157827	155795	180727	164828	161281	164794	1.02179	0.0310948	0.684411
CYRIA	37091.3	37964.4	31453.1	32162.4	33260.8	29462.8	33762.8	28533.1	34667.8	31254.9	0.901553	-0.149516	0.162269
CYRIB	636353	712962	659143	628944	657609	650474	685467	632933	659351	656621	0.99586	-0.00598555	0.905895
CYTH1	21573.8	18593.1	23687.5	22145.8	29745.6	18249.8	23367.7	23318.9	21500	23670.5	1.10095	0.138752	0.446371
CYTH2	55650.4	62007.4	46819.3	63639.9	77263.1	46077.3	71366.6	57791	57029.3	63124.5	1.10688	0.146498	0.481264
CYTH3	9543.01	21277	21960.9	22105.4	1	23443.1	27099.4	34032.5	18721.6	21144	1.12939	0.175544	0.776927
CZIB	237354	175834	222532	188910	243510	226820	223782	204860	206157	224743	1.09015	0.124528	0.310707
D2HGDH	26069.1	23429.6	23869.5	33259.7	30196.1	23910.4	30143.4	25739.7	26657	27497.4	1.03153	0.0447828	0.773353
DAAM1	13970.3	13542.6	13784.8	12393.4	17930.3	12425.9	13962.4	16267.1	13422.8	15146.4	1.12841	0.174297	0.25513
DAB2	36452.7	31492.1	50668.2	34654.8	60054.8	56603	66126.9	29670.5	38316.9	53113.8	1.38617	0.471105	0.170963
DACH1	88004.4	71154.7	41376.1	44008.1	56456.7	94861.4	71897	64634.5	61135.8	71962.4	1.17709	0.235226	0.468674
DAD1	1.18415e+06	1488768	1.42608e+06	1.22552e+06	1281403	1.2282e+06	1.27099e+06	1.10861e+06	1.33113e+06	1.2223e+06	0.918245	-0.123049	0.258567
DAG1	6146.03	4196.59	3355.5	2765.71	4823.73	4664.7	6165.52	4297.93	4115.96	4987.97	1.21186	0.277223	0.351332
DAGLB	27088.9	30609.1	27737.3	30777.2	27725	27010	32416.3	26734.4	29053.1	28471.4	0.979978	-0.0291792	0.73606
DAP3	485619	465669	445255	528260	435259	469565	531275	482505	481201	479651	0.996779	-0.0046542	0.955511
DAPK1	14400.9	15238.2	15931	16762.8	13645.3	14544.2	20809.4	15681.4	15583.2	16170.1	1.03766	0.0533319	0.746184
DAPK3	55623.8	58164.6	55572.4	57668.8	63626.7	54923.8	61568.9	65880.7	56757.4	61500	1.08356	0.115778	0.136163
DAPP1	12454.2	12302	11972.5	20902.7	13729.6	12124.6	15430.1	17161.4	14407.8	14611.4	1.01413	0.0202461	0.936724
DARS1	4523846	4464006	4342869	4.56951e+06	4.07999e+06	4.45052e+06	4.5816e+06	4206656	4.47506e+06	4.32969e+06	0.967516	-0.0476425	0.304899
DARS2	475310	434804	415966	470252	441489	463345	466684	478749	449083	462567	1.03002	0.0426791	0.446692
DAXX	143972	148597	123185	152771	197997	154913	170481	136653	142131	165011	1.16097	0.215336	0.183992
DAZAP1	739611	548035	428538	541370	545751	672338	554538	726859	564388	624871	1.10717	0.146871	0.473375
DBF4	17529.7	1	16046.5	20486.6	15232.6	13810.8	21369	22597.7	13516	18252.5	1.35044	0.43343	0.401612
DBI	30700.6	29159.9	20614.7	37958.7	20074.9	32024.4	31572	37569.3	29608.5	30310.2	1.0237	0.0337911	0.895386
DBN1	102230	103157	108564	99710.5	123051	109195	117115	98325.6	103415	111922	1.08226	0.114041	0.212707
DBNL	65935.2	67530.3	68681.5	65453.8	62131.1	62412.9	68653.1	60211.1	66900.2	63352.1	0.946963	-0.0786197	0.148053
DBR1	163599	138771	141647	138324	156148	159521	138915	156214	145585	152700	1.04887	0.0688312	0.389764
DBT	193392	186769	184337	210411	197053	182725	209882	214140	193727	200950	1.03728	0.0528087	0.463344
DCAF1	104072	100541	101670	103779	95707.3	98752.4	96292.6	90962.7	102516	95428.7	0.930871	-0.103347	0.0144283
DCAF10	9675.08	7145.75	8682.12	14155.7	11901.3	9206.45	17648.8	10118.7	9914.65	12218.8	1.2324	0.301473	0.379643
DCAF11	52067	60651.3	49979.2	51673	54576.6	54844.7	59982.7	55793.1	53592.6	56299.3	1.0505	0.0710823	0.3674
DCAF12	65352.3	67046	59031.8	71766.9	42488.8	56441.9	72296	67088.6	65799.2	59578.8	0.905464	-0.143271	0.430581
DCAF13	150200	129306	109776	143830	118123	137201	136489	157015	133278	137207	1.02948	0.0419179	0.754271
DCAF15	38094.3	33589.8	28919.6	38892	36349.2	36426.9	33199.6	44005.1	34873.9	37495.2	1.07516	0.104557	0.450969
DCAF16	199513	177666	168254	165029	171648	164714	165526	161663	177615	165888	0.933972	-0.0985491	0.230215
DCAF5	19427.7	23237.5	18895	21519.6	1	21594.7	28887	20760.8	20770	17810.9	0.857529	-0.221743	0.668687
DCAF6	41506.9	36380.9	34408.8	32927.8	39337.2	35318.8	35070	34681	36306.1	36101.8	0.994372	-0.00814243	0.928599
DCAF7	179602	185839	184977	203385	199598	185819	206817	199639	188451	197968	1.0505	0.0710804	0.211199
DCAF8	51611.1	42989.6	36443.8	46680.2	44689.5	47623.1	51667	48970	44431.2	48237.4	1.08567	0.118579	0.336512
DCAKD	90889.1	96798.9	90237.5	100726	95582.5	91941.7	101760	96230.2	94662.9	96378.5	1.01812	0.0259118	0.614163
DCK	226655	245053	246521	249008	235713	219871	253919	231014	241809	235129	0.972375	-0.0404154	0.476574
DCP1A	61686.2	67224.9	55906.4	69741.2	57705.1	64037.1	71413.8	69752.2	63639.7	65727.1	1.0328	0.0465616	0.649992
DCP1B	12793.6	12027.5	11219.3	14163.8	14477.1	12665.5	14913	14493.3	12551.1	14137.2	1.12637	0.171686	0.0976257
DCP2	92575.1	88289.6	83197.8	84139.4	88449.7	89552.2	85203.6	94978.6	87050.5	89546	1.02867	0.0407772	0.431192
DCPS	276520	297436	264241	291120	275453	273095	272830	285040	282329	276604	0.979723	-0.0295539	0.514361
DCTD	195080	187994	159223	185896	191197	194664	171701	184591	182048	185538	1.01917	0.0273941	0.723858
DCTN1	315699	304160	297057	315224	292688	301820	309585	320815	308035	306227	0.994131	-0.00849235	0.817806
DCTN2	88524.6	74476.2	99818	98619.6	62531.4	74747.7	99697.9	65574.5	90359.6	75637.9	0.837076	-0.256569	0.20749
DCTN3	207904	220320	204351	217515	196185	180984	181001	246776	212523	201236	0.946894	-0.0787259	0.527717
DCTN4	185327	181122	186606	183250	184479	192227	180901	191487	184076	187274	1.01737	0.0248448	0.345238
DCTN5	60593	57605.5	55046.3	60427.8	53366.5	51559.4	62472.7	56725.4	58418.1	56031	0.959137	-0.0601911	0.425734
DCTN6	72259.3	79060.9	63962.6	77953.2	108270	71504.8	81358.5	77986.9	73309	84780.2	1.15648	0.209736	0.26137
DCTPP1	43066.7	50000.5	44148.4	53702.3	44616.5	38864.4	52249.5	44390.3	47729.5	45030.2	0.943445	-0.0839891	0.495675
DCUN1D1	82602.2	84910.6	86435.6	82740	79540.4	80785	82440.6	86813.2	84172.1	82394.8	0.978885	-0.0307885	0.3791
DCUN1D5	360950	394880	341676	343720	361881	329501	358418	357452	360306	351813	0.976427	-0.034416	0.581477
DCXR	545737	514438	465084	516747	498630	518831	520194	530303	510501	516990	1.01271	0.0182206	0.737042
DDA1	81954.1	1	1	39359.6	47056	1	56195.9	32658.9	30328.9	33977.9	1.12032	0.163905	0.880632
DDAH2	40162.7	42627.8	43203.2	40833.1	28349.7	27596.8	42342.9	45716.4	41706.7	36001.5	0.863205	-0.212224	0.311825
DDB1	1.9788e+06	2.04097e+06	1.94263e+06	1.91198e+06	1.82637e+06	1.86528e+06	1956607	1.8492e+06	1.9686e+06	1.87436e+06	0.952131	-0.0707676	0.0557193
DDB2	18909.5	20506.7	1	9605.33	1	17272.7	21626.9	22524.9	12255.6	15356.4	1.25301	0.325393	0.676446
DDHD1	1	27645.2	28431.1	35547.7	1	30426.1	34758.4	30622.4	22906.3	23952	1.04565	0.0644018	0.928866
DDHD2	36923	35335.9	32863.8	38811.2	29969.2	38378.3	40880.7	38478.7	35983.5	36926.7	1.02621	0.0373304	0.742571
DDI2	452204	436320	442585	426241	406364	424728	435804	469139	439338	434009	0.98787	-0.0176064	0.72783
DDOST	2981546	3.03772e+06	3213718	3.1445e+06	2.90734e+06	2.93013e+06	3.09794e+06	2.88968e+06	3.09437e+06	2.95627e+06	0.955371	-0.0658665	0.099614
DDRGK1	256307	287387	245969	263580	277368	265577	278676	329780	263311	287850	1.0932	0.128551	0.203527
DDT	287255	268274	248818	294217	178636	252448	289736	301352	274641	255543	0.930463	-0.10398	0.554377
DDX1	1825091	1.73046e+06	1.71255e+06	1.87976e+06	1738995	1.81001e+06	1.77123e+06	1.86538e+06	1.78697e+06	1.7964e+06	1.00528	0.00759943	0.851476
DDX10	187709	198486	188722	202635	196603	194520	206779	186169	194388	196018	1.00839	0.0120474	0.781156
DDX11	11514.8	10570.2	11834.6	13049.1	10566.9	11653.8	11661	12985.6	11742.2	11716.8	0.997839	-0.00312087	0.972724
DDX11L8	11692.8	12679.5	8904.23	26234.8	1	23804.6	18051.9	16475.2	14877.8	14583.2	0.980196	-0.028858	0.964931
DDX17	2.7755e+06	2.68723e+06	2550596	2.95306e+06	2.45559e+06	2626922	2882396	2.92706e+06	2.7416e+06	2.72299e+06	0.993214	-0.00982407	0.898469
DDX18	1.17871e+06	1137837	1.0846e+06	1.16327e+06	983462	1.10463e+06	1.11936e+06	1.06283e+06	1.1411e+06	1.06757e+06	0.935559	-0.0960988	0.099318
DDX19A	1.54959e+06	1.33595e+06	1308032	1.46878e+06	1.08389e+06	1.37572e+06	1.38821e+06	1.43764e+06	1.41559e+06	1.32137e+06	0.933442	-0.0993684	0.378887
DDX19B	23035.4	29846	14479.7	16514.3	16853	18479.5	26726.8	22630	20968.9	21172.3	1.0097	0.0139323	0.962509
DDX20	229114	207879	207297	250943	209265	214772	223135	223759	223808	217733	0.972854	-0.0397048	0.610822
DDX21	3.83506e+06	3671211	3.70977e+06	3919875	3.39189e+06	3.66851e+06	3.76583e+06	3.68012e+06	3.78398e+06	3.62659e+06	0.958406	-0.0612905	0.169702
DDX23	932256	883210	853135	1.00671e+06	903978	900735	961394	960568	918828	931669	1.01398	0.0200224	0.74804
DDX24	384593	368131	354793	399553	361347	362583	390373	389074	376767	375844	0.99755	-0.00353842	0.944145
DDX27	407034	379285	388683	406804	398026	361893	399894	393616	395452	388357	0.98206	-0.026117	0.553722
DDX28	171120	166071	164966	179410	164854	169104	170710	171973	170391	169160	0.992775	-0.0104613	0.751071
DDX31	97827.9	93344.8	82708.5	94375.3	98690.5	93774.5	94464.7	93913.3	92064.1	95210.8	1.03418	0.0484854	0.418347
DDX39A	1.46122e+06	1.36795e+06	1.31218e+06	1555293	1.4441e+06	1.49824e+06	1.36579e+06	1.49954e+06	1424160	1451919	1.01949	0.0278497	0.673713
DDX39B	10283688	10110339	9512347	10440982	9203745	9628007	10161328	10060318	10086839	9.76335e+06	0.96793	-0.0470261	0.321087
DDX3X	3.75287e+06	3.64754e+06	3.74604e+06	4.02437e+06	3.652e+06	3.66078e+06	3.84575e+06	3879590	3.79271e+06	3.75953e+06	0.991253	-0.0126742	0.753926
DDX41	357799	349538	342178	363761	351922	345173	364786	358088	353319	354992	1.00474	0.00681616	0.800091
DDX42	1.02442e+06	1.01325e+06	970123	1.07026e+06	971095	995398	1.0504e+06	1.05465e+06	1.01951e+06	1.01788e+06	0.998403	-0.00230527	0.95725
DDX46	1615959	1563602	1.4881e+06	1.62683e+06	1.45153e+06	1.53468e+06	1.64081e+06	1.60115e+06	1.57362e+06	1.55704e+06	0.989464	-0.015281	0.762029
DDX47	735088	742347	705328	754281	679178	709587	748621	716717	734261	713526	0.97176	-0.0413281	0.288613
DDX49	334655	317996	303070	297517	341517	314664	302898	301474	313309	315138	1.00584	0.00839672	0.888212
DDX5	7807571	7.25233e+06	6867929	8.01261e+06	7.14398e+06	7.23016e+06	7.92562e+06	7953419	7.48511e+06	7.56329e+06	1.01045	0.0149915	0.826024
DDX50	548988	537922	512362	579068	544066	548026	567710	560646	544585	555112	1.01933	0.0276221	0.518713
DDX51	258121	245584	240040	270587	249459	252709	260234	262430	253583	256208	1.01035	0.014858	0.742378
DDX52	263798	246748	239739	269091	244815	246694	282841	262876	254844	259307	1.01751	0.0250455	0.705502
DDX54	440552	460200	435050	462492	431218	440901	477789	428655	449573	444641	0.989028	-0.0159161	0.725951
DDX55	146923	154316	148143	156727	148856	146919	159683	154351	151527	152452	1.0061	0.0087771	0.812743
DDX56	264609	262564	255132	285407	261155	276772	288070	271407	266928	274351	1.02781	0.0395733	0.420478
DDX59	36252	35198.3	28644.8	34002.6	39995.2	30885.5	33227.9	38449.1	33524.4	35639.4	1.06309	0.0882617	0.469779
DDX6	1730381	1.76658e+06	1.62022e+06	1.77828e+06	1.63702e+06	1.67845e+06	1.71405e+06	1.66514e+06	1.72386e+06	1.67367e+06	0.97088	-0.0426352	0.269597
DDX60L	1874.13	1	1	1	1	1	15811.1	2406.04	469.282	4554.79	9.70587	3.27886	0.361528
DECR1	2250465	2229885	2.22764e+06	2.17502e+06	1.98756e+06	2.3557e+06	2.1593e+06	2301628	2.22075e+06	2.20105e+06	0.991127	-0.0128587	0.828411
DECR2	27965.8	40732.9	33224.9	40482	34590.1	41413.4	39887.2	41446.7	35601.4	39334.4	1.10485	0.143856	0.337611
DEDD	1	1	8324.53	1	1	1	9518.62	8838.68	2081.88	4589.82	2.20465	1.14055	0.486614
DEF6	109073	106602	94664.3	114062	101241	109263	115533	108416	106100	108613	1.02369	0.0337727	0.638251
DEGS1	75600.8	62049.8	57280.7	82056.1	15262.4	66245.4	80010.8	80682.9	69246.8	60550.4	0.874414	-0.193612	0.627266
DEK	2.13318e+06	2.35735e+06	2.13186e+06	2141459	1.92466e+06	2.05592e+06	2.16128e+06	2.3215e+06	2.19096e+06	2.11584e+06	0.965713	-0.0503329	0.487621
DENND10	32876.9	33753.9	39807.2	43498.6	45641.8	31146.1	41435.7	42579.2	37484.2	40200.7	1.07247	0.100939	0.52709
DENND1A	36453.7	50053.1	51481	50554	52629.8	50587.1	60921.1	44978.7	47135.4	52279.2	1.10913	0.149424	0.331415
DENND3	1205.36	20689	5492.98	13158.7	1	1	12697.1	11060.4	10136.5	5939.89	0.58599	-0.771051	0.476406
DENND4A	22489.9	21801.5	18414.3	21949.3	23634.3	21302.3	21034.9	22383.1	21163.8	22088.7	1.0437	0.0617093	0.438529
DENND4B	25629.4	23972.7	22126.8	28169.8	23124.6	24691.1	24691.8	26439.4	24974.7	24736.7	0.990471	-0.0138133	0.876726
DENND4C	39278.4	36965.6	34716.4	38456.1	40090.1	37833	42504.6	39028	37354.1	39863.9	1.06719	0.0938158	0.125489
DENND6A	27025.9	27837	23006.8	32230.9	23990.9	26236.7	32675.9	26224.7	27525.2	27282	0.991167	-0.0127997	0.930205
DENR	1492335	1.33586e+06	1.30737e+06	1.1917e+06	1.16305e+06	1.21492e+06	1.01075e+06	1.43743e+06	1.33182e+06	1.20654e+06	0.905935	-0.142521	0.294436
DEPDC1B	17576.5	17903.2	14488.1	13056	27095.3	16210.2	18704.1	21337.3	15755.9	20836.7	1.32247	0.403232	0.117006
DEPDC5	9496.32	19175.5	1	18632.7	10384	11943.4	7785.63	7705.97	11826.4	9454.73	0.799462	-0.322899	0.641479
DERA	32275	30935.1	27360.6	33144.3	36792.1	33104	33159.3	29225	30928.7	33070.1	1.06923	0.0965789	0.327374
DERL1	467374	449446	404753	407988	93333.3	372597	431140	382673	432390	319936	0.739923	-0.434552	0.239212
DERPC	184505	185600	188544	186946	183570	174569	186529	196321	186399	185247	0.993823	-0.00893864	0.816162
DFFA	129287	96240.4	110673	118151	116954	123431	133816	97605.8	113588	117952	1.03842	0.0543895	0.686723
DFFB	41697.3	39434.5	37721.9	36954.2	33536.7	34759.3	40689.7	39469.3	38952	37113.7	0.952807	-0.0697437	0.409515
DGAT1	211177	300948	264772	215615	223248	220134	215049	180243	248128	209669	0.845001	-0.242975	0.174319
DGCR8	102877	115313	98323.9	112312	107152	111373	105360	121988	107206	111468	1.03976	0.0562442	0.463818
DGKA	53428.6	51108.2	54188.1	58753.5	89507.6	52156.9	55464	54199.9	54369.6	62832.1	1.15565	0.208702	0.415398
DGKE	9073.07	15431.3	12332.4	7323.17	1	9670.23	21737.2	14842	11040	11562.6	1.04734	0.066729	0.9206
DGKQ	3709.49	4049.92	2245.21	5556.68	1	2232.09	8198.26	2076.89	3890.32	3127.06	0.803804	-0.315084	0.707863
DGKZ	55550	55217.6	52443	54827.9	53235.1	56854.4	59209.8	54992.2	54509.6	56072.9	1.02868	0.0407927	0.336954
DGLUCY	18685.3	1	10139	35734.3	21607.2	15251.6	70178.6	14713.7	16139.9	30437.7	1.88587	0.91523	0.396087
DGUOK	81975.3	74967.5	64992.7	97163.9	56120.2	70154.9	80321.1	83435.9	79774.8	72508	0.908908	-0.137794	0.457323
DHCR24	712118	638062	550520	703319	519096	643892	650752	622845	651005	609146	0.935702	-0.0958791	0.420493
DHCR7	549824	498614	541810	431755	438572	458523	461055	417480	505501	443907	0.878153	-0.187455	0.102923
DHDDS	53322.3	57040.3	56445.8	52766.4	42680.4	50077.6	60275.6	54151.7	54893.7	51796.3	0.943575	-0.0837914	0.471616
DHFR	688118	796307	738211	803971	645161	773132	795638	835840	756652	762443	1.00765	0.0109998	0.91096
DHODH	185486	192414	183837	191281	184442	189732	199745	209417	188254	195834	1.04026	0.0569492	0.271902
DHPS	220515	233399	207250	222388	233482	203703	231317	222383	220888	222721	1.0083	0.0119254	0.839389
DHRS1	238368	190922	182032	203315	213795	229014	184917	239838	203659	216891	1.06497	0.090813	0.470362
DHRS11	75050.5	122220	88959.6	120716	135974	122656	138687	149421	101737	136684	1.34351	0.42601	0.0509297
DHRS13	62216.3	76648.9	71706.1	71001.1	76725.2	70929.4	72530.5	75717.5	70393.1	73975.6	1.05089	0.0716156	0.335341
DHRS2	11288.1	4297.07	2491.42	1515.93	1	17623.5	18441.9	4759.79	4898.14	10206.6	2.08376	1.05919	0.35494
DHRS3	118890	114302	97614.7	115793	118743	114668	120762	112840	111650	116753	1.04571	0.0644794	0.376448
DHRS4	109666	129375	120248	126211	147134	133253	127176	138799	121375	136590	1.12536	0.170384	0.0460307
DHRS7	93849.1	98400.2	83399.3	79190.3	88059.8	75608.3	85738.5	87202.4	88709.7	84152.2	0.948625	-0.0760907	0.429512
DHRS7B	27774.9	25336.1	19063.9	29192.6	35004.3	25274.6	29560.3	29015.5	25341.9	29713.6	1.17251	0.229602	0.196553
DHRS9	13968.4	11710.9	1	22132.3	1	29741.5	1	16374	11953.2	11529.4	0.964545	-0.0520797	0.962234
DHRSX	8313.45	12263.4	9081.28	12923.9	15853.2	11540.3	10460.4	10925.3	10645.5	12194.8	1.14553	0.196019	0.3939
DHTKD1	47925.3	36166.3	34604	46740.3	43123.4	38728.8	44411.8	44058	41359	42580.5	1.02953	0.0419926	0.759251
DHX15	2.06684e+06	1.96895e+06	1.78865e+06	2220470	1.62485e+06	1.89274e+06	2182464	2.04676e+06	2.01122e+06	1.9367e+06	0.962946	-0.0544731	0.638193
DHX16	300658	297950	283619	319146	266499	288318	314737	304473	300343	293507	0.977238	-0.0332185	0.614765
DHX29	285970	286778	264514	297670	270046	271005	289278	281920	283733	278062	0.980013	-0.0291275	0.525048
DHX30	445962	428387	399812	453699	415644	434618	441603	441291	431965	433289	1.00307	0.00441532	0.925682
DHX32	8136.14	8876.12	7834.74	9119.75	7915.3	6335.18	7485.45	7895.58	8491.69	7407.88	0.872368	-0.196991	0.0660352
DHX33	132175	130191	125471	124612	126651	115412	121113	120257	128112	120858	0.943379	-0.08409	0.0506873
DHX34	39130.1	40702.8	36929.2	43334.6	36899.3	38663.2	42533	43696.6	40024.1	40448	1.01059	0.0151986	0.846256
DHX35	78115.5	69817.4	64754.1	83308.1	53901.9	69700	80911.3	80425.2	73998.7	71234.6	0.962646	-0.0549223	0.729413
DHX36	324593	297149	300420	341857	310735	304027	339131	328175	316005	320517	1.01428	0.0204551	0.746231
DHX37	308822	287501	299478	300721	256342	290335	306962	299796	299130	288359	0.96399	-0.05291	0.422489
DHX38	260976	252471	241296	261373	235151	247759	267564	258950	254029	252356	0.993414	-0.0095324	0.85066
DHX40	22248.7	21976.1	24034.4	24170.2	23252.5	23246.8	24708.6	23235.6	23107.3	23610.9	1.02179	0.0311008	0.494186
DHX57	79561.4	84979.1	86930.6	82957.2	86879.6	83051.7	81346.4	84276.6	83607.1	83888.6	1.00337	0.00484931	0.890748
DHX8	161305	153202	150114	156691	149151	149986	159002	163612	155328	155438	1.00071	0.0010186	0.98041
DHX9	7.47779e+06	7.24536e+06	7.00635e+06	7741932	6.71463e+06	7.20186e+06	7.46546e+06	7422184	7.36786e+06	7.20103e+06	0.977358	-0.0330407	0.501634
DIABLO	519943	569527	536477	573329	558895	485131	579010	522832	549819	536467	0.975716	-0.035467	0.607632
DIAPH1	1.9465e+06	1.91617e+06	1.79752e+06	1.91449e+06	1610612	1.8075e+06	1.88502e+06	1.83281e+06	1.89367e+06	1.78399e+06	0.942079	-0.0860795	0.174157
DIAPH2	22994.1	21121.1	16484	23896.8	19820.5	21558.8	24113.3	23112.7	21124	22151.3	1.04863	0.0685085	0.612893
DIAPH3	48668.7	49999.9	45327.9	55967.5	46579.2	51769.2	55632	52398.8	49991	51594.8	1.03208	0.0455573	0.601512
DICER1	45007.4	43667.2	42666	43628.2	40625.8	42238.4	47525.3	42307.8	43742.2	43174.3	0.987018	-0.0188522	0.738785
DIDO1	110846	116048	99242.6	115866	104152	109721	119923	126539	110501	115084	1.04147	0.058625	0.501412
DIMT1	566569	552928	531481	592642	555675	542301	578750	543981	560905	555177	0.989787	-0.0148099	0.723257
DIP2A	24119.7	21051.2	14579.8	24610.9	19971.6	21349.5	22322.2	23875.2	21090.4	21879.6	1.03742	0.0530013	0.764559
DIP2B	292417	291925	267186	304171	284864	296786	310602	296026	288925	297070	1.02819	0.0401067	0.423724
DIP2C	79071.2	169270	111599	208556	1	125146	136799	69188.7	142124	82783.5	0.582473	-0.779736	0.213613
DIPK1B	18373.9	11034.2	1	12902.5	1	8919.94	1	1	10577.9	2230.73	0.210886	-2.24547	0.122046
DIPK2A	29008.2	29219.6	34405.8	29007.9	35874.6	28501.1	26948	31539	30410.4	30715.7	1.01004	0.0144115	0.902487
DIS3	477825	485799	466108	505320	433064	466829	483271	477388	483763	465138	0.9615	-0.0566412	0.233576
DIS3L	21747.1	24047.2	25732.2	26255.7	26242.2	23284.3	28111.2	24923.3	24445.5	25640.3	1.04887	0.06884	0.438674
DIS3L2	73756.2	70123.6	69593.1	73727.5	65843.8	59562.7	57214.7	61325.7	71800.1	60986.7	0.849396	-0.235491	0.00396757
DKC1	759390	740086	667212	821224	736859	700241	765639	758000	746978	740185	0.990906	-0.0131801	0.854838
[truncated: 5,749 more rows]
