# Supplementary material for: ACSL4-Associated Lipid Metabolism is a Distinct Therapeutic Vulnerability in KMT2A-Rearranged Acute Myeloid Leukemia
Source: Research Square preprint supplement (doi:10.21203/rs.3.rs-4924771/v1), 2024-10-15
Supplement: Supplementary file 4 [file a8f43ce6754789182c32fcb6.xlsx]

## Sheet: NOMO1_Lipidomics
Supplementary Table S4A: Normalized lipid counts of NOMO1 cells.
Sample	NOMO1 NTC a	NOMO1 NTC b	NOMO1 NTC c	NOMO1 NTC d	NOMO1 NTC e	NOMO1 ACSL4 a	NOMO1 ACSL4 b	NOMO1 ACSL4 c	NOMO1 ACSL4 d	NOMO1 ACSL4 e
CE(16:1)	252.929	288.652	228.973	245.637	204.257	253.471	312	344.231	231.793	312.618
CE(18:1)	242.106	235.955	226.112	194.278	193.538	285.642	371	348.911	328.126	333.553
CE(18:2)	102.192	115.396	38.7099	64.8121	71.3295	93.5392	91.6	52.2649	65.6648	94.4269
CE(18:3)	46.2916	51.6802	41.8652	45.766	41.67	41.7536	50.6	51.1541	35.7041	49.5765
CE(20:4)	32.3095	0	0	24.2167	0	31.0515	0	33.3187	0	0
CE(20:5)	35.5852	42.5127	39.9934	29.5575	36.6925	39.9727	41.6	52.817	30.9312	49.5282
CE(22:5)	265.606	278.024	251.418	270.206	227.31	59.4847	142	100.238	82.5151	89.9568
CE(22:6)	96.1875	83.4998	98.9809	76.3416	79.4355	35.6066	0	28.5865	12.7919	28.4757
Cer(d16:2_24:0)	1.30027	1.32379	1.37332	1.03368	1.08288	0.986446	1.32	1.35937	1.24557	1.47933
Cer(d18:0_16:0)	8.84	11	11	9.24	9.68	8.95	12.3	11.9	10.8	11
Cer(d18:0_17:0)	0.699663	0.824059	0.749586	0.552612	0.690167	0.507095	0.848	0.693612	0.678845	0.78854
Cer(d18:0_18:0)	8.01	8.45	8.83	7.28	6.72	6.91	10	10	8.13	9.38
Cer(d18:0_20:0)	1.39731	1.5661	1.74465	1.30746	1.30999	1.20469	1.65	1.67298	1.50378	1.73496
Cer(d18:0_22:0)	3.94	4.3	4.77	3.59	3.7	3.07	4.12	4.38	3.79	4.64
Cer(d18:0_23:0)	1.17251	1.10099	1.26685	1.03378	1.00664	0.885315	1.11	1.2138	1.08109	1.31926
Cer(d18:0_24:0)	3.15	3.09	3.49	2.51	2.83	2.18	2.91	2.97	2.56	2.93
Cer(d18:1_16:0)	95.2	102	100	90.4	88	72.5	103	94.2	85.9	98.1
Cer(d18:1_17:0)	4.31	4.37	4.81	4.09	4.12	2.86	4.34	4.15	3.54	4.19
Cer(d18:1_18:0)	37.5	39.2	36.6	33.3	32.4	26.7	37.5	35.7	31.6	33.8
Cer(d18:1_19:0)	1.7619	1.95323	2.14	1.62421	1.62205	1.50143	1.87	1.9613	1.66256	1.82238
Cer(d18:1_20:0)	8.17	8.54	9.12	7.2	7.53	6.04	8.15	8.42	7.07	8.41
Cer(d18:1_22:0)	50.5	56	62.2	44.9	48	38	53.6	53.2	45.8	52
Cer(d18:1_23:0)	12.9	13.9	14.8	11.3	11.6	8.75	12	12.3	11.1	12.3
Cer(d18:1_24:0)	50.3	52	57	44.6	45.3	30.5	43.6	42.3	37.4	44.9
Cer(d18:1_24:1)	31	33.8	37.3	27.5	29.3	26	35.1	36.2	32.6	37.3
Cer(d18:1_26:0)	1.53843	1.37174	1.55112	1.18981	1.19909	0.968937	1.1	1.22288	0.964684	1.12454
Cer(d18:1_26:1)	0.66736	0.728151	0.795973	0.902469	0.663921	0.513498	0.903	0.605433	0.785915	0.649758
Cer(d18:2_16:0)	6.78	7.25	6.63	6.62	6.66	5.43	8.28	7.66	7.09	7.62
Cer(d18:2_18:0)	3.78	3.98	3.95	3.34	3.37	2.61	3.56	3.55	3.23	3.85
Cer(d18:2_20:0)	0.848409	0.86197	0.850821	0.661829	0.52519	0.719398	0.755	0.777477	0.852476	0.812613
Cer(d18:2_22:0)	6.29	6.71	7.63	5.43	5.73	4.71	6.46	6.7	5.76	6.96
Cer(d18:2_23:0)	2.42	2.00787	2.33	1.66595	1.6765	1.48115	1.9	2.05	1.75944	2.11
Cer(d18:2_24:0)	10.5	11.1	12.2	8.73	9.67	7.41	9.91	10	8.88	9.84
Cer(d18:2_26:0)	0.680815	0.732087	0.717958	0.290316	0.616679	0.39727	0.221	0.668853	0.223859	0.632772
DG(14:0_16:0)	6.86878	4.28011	4.24144	2.3417	4.19976	6.69923	4.56	7.28998	5.06494	5.57877
DG(14:0_18:1)	61.3	43.8	39.5	41.2	45.3	57.6	80.2	58.6	61.3	56.5
DG(16:0_16:0)	52.7	50.5	49.8	42.1	45.9	58.8	66.3	63.3	62.8	59.3
DG(16:0_17:0)	12.1844	8.93664	9.58798	8.56336	10.1272	12.073	14.4	13.0169	13.5034	11.7445
DG(16:0_17:1)	24.9674	16.4872	17.3526	14.3515	15.8463	23.1775	25.8	25.6967	22.8076	24.5707
DG(16:0_18:0)	99.4	87.1	82.6	73.9	79.2	96.1	118	114	110	108
DG(16:0_18:1)	468	415	425	361	418	524	604	556	533	553
DG(16:0_18:2)	243	213	200	189	214	247	305	256	245	237
DG(16:0_20:1)	492	453	454	386	426	534	621	590	554	584
DG(16:0_20:3)	117	97.7	106	99.6	97.2	109	140	129	113	126
DG(16:0_20:4)	33.2	34.6	29.6	26.4643	27.694	16.6039	24.2	16.8522	17.1834	17.5001
DG(16:0_22:1)	18.4602	15.7266	15.9488	15.3259	15.3601	20.8371	24.9	22.4378	23.0687	23.0532
DG(16:0_22:6)	36.3	34.6	31.5	34.8	32.9	7.85306	13.2	14.3564	8.26258	12.0522
DG(17:0_18:1)	27.9081	23.9493	24.1635	20.0505	22.4337	32.3797	38.3	35.1	32.9	33.4
DG(17:0_22:5)	21.1701	19.6078	20.3539	17.1005	18.9662	10.5974	10.5	12.6752	11.6323	11.1098
DG(17:1_18:0)	34.2	32	32.1	25.1566	29.0703	36.1	43.9	40.2	37.3	38.4
DG(18:0_18:0)	21.3367	17.0721	18.0042	16.3849	17.0081	19.3026	21.8	22.009	26.0401	20.8505
DG(18:0_18:2)	282	254	255	228	247	275	316	296	277	282
DG(18:0_18:3)	53.3	50.8	49.1	40.9	50.6	48.9	57.8	61.2	49.5	55.8
DG(18:0_20:3)	173	161	172	134	151	206	260	239	228	234
DG(18:0_20:4)	631	652	663	543	583	302	363	334	317	355
DG(18:0_22:4)	16.7886	13.2916	13.5191	11.387	12.3222	13.8144	15	15.1769	14.1405	15.4358
DG(18:1_18:1)	426	404	375	341	391	487	587	487	475	540
DG(18:1_18:2)	147	137	116	125	124	134	164	128	123	128
DG(18:1_18:3)	64.4	61.8	48.5	61.5	62.6	57.5	74.9	60.7	58.9	58.1
DG(18:1_19:0)	4.01804	3.29123	3.33636	2.40183	2.85971	3.1534	3.47	5.39595	4.77308	4.1988
DG(18:1_20:1)	53.4	46.3	46.9	38.8	47.9	73.2	92	86	81.8	85.1
DG(18:1_20:4)	184	163	152	143	159	107	125	108	101	103
DG(18:1_22:4)	17.017	17.0988	16.8141	15.0598	15.3785	8.14446	12.6	11.5985	9.70758	10.7021
DG(18:1_22:5)	121	116	110	104	115	51.3	68.5	59.5	56.3	49.2
DG(18:2_18:2)	31.8756	25.4348	27.5	22.6661	29.222	29.371	34.1	26.262	24.3755	26.1526
DG(19:1_18:1)	11.302	9.03595	8.83421	6.05848	9.05504	13.3059	14	12.0456	12.0081	12.4098
DG(20:1_20:2)	0	0	0	0	0	0	0	0	0	0
GM3(d18:1_16:0)	1.76973	2.04081	1.94789	1.55108	1.67687	1.32623	1.85	1.66902	1.29847	1.72385
Hex2Cer(d18:1_16:0)	86	82.4	92.6	77.2	75	60.5	78.1	77.2	68.8	75.7
Hex2Cer(d18:1_18:0)	25.7	28	32.1	24	27.8	17.5	25.7	24.6	21	24.1
Hex2Cer(d18:1_20:0)	6.71	6.81	7.02	5.51	6.03	4.38	6.17	5.19	5.03	5.64
Hex2Cer(d18:1_22:0)	37.5	37.3	42.4	32	35.1	24.6	35.2	32.6	28.3	33.2
Hex2Cer(d18:1_24:0)	22.9	22.9	25.4	19.5	20.4	14.9	20.4	20	18.5	20.4
Hex2Cer(d18:1_24:1)	17.1	16.5	18.8	13.9	15.5	12.8	17.7	16.9	14.9	17.2
Hex2Cer(d18:1_26:1)	0.338581	0.374467	0.430554	0.169534	0.221002	0.134641	0.177	0.342684	0.221019	0.318807
LPC(14:0)	2.6008	2.60148	2.91124	2.33116	2.23682	2.49684	3.14	3.41317	3.01749	3.42
LPC(15:0)	2.31498	2.36675	2.43603	2.16747	2.10219	2.3081	3.1	2.8795	2.59841	2.9538
LPC(16:0)	123	130	136	116	106	116	155	153	138	149
LPC(16:1)	7.93	8.06	8.57	7.21	6.59	8.81	11.3	11.4	10.2	11
LPC(17:0)	7.9	8.53	8.64	7.61	6.77	7.37	9.79	9.64	8.41	9.38
LPC(18:0)	226	248	247	222	199	220	296	293	252	275
LPC(18:1)	51.2	52.5	54.9	47.5	42.9	53.5	71.1	70.3	61.7	67.7
LPC(18:2)	6.66	6.83	7.49	5.86	5.49	8	10.3	10.8	9.38	10.5
LPC(18:3)	0.232335	0.259974	0.294885	0.108287	0	0.249499	0.224	0.465291	0.352942	0.436266
LPC(19:0)	1.38839	1.72746	1.61057	1.37461	1.31695	1.34606	1.81	2.03281	1.58633	1.78851
LPC(19:1)	0	0	0	0	0	0	0	0	0	0
LPC(20:0)	0.609196	0.372317	0.545898	0.569445	3.49439	0.703089	0.528	0.519702	0.5637	0.492112
LPC(20:1)	0.463709	0.575272	0.586425	0.360391	0.43654	0.637175	0.76	0.761092	0.76007	0.822902
LPC(20:2)	0	0	0	0	0	0	0	0	0	0
LPC(20:3)	1.25473	1.30977	1.41441	1.01419	1.02149	0.981861	1.33	1.42362	1.41664	1.39185
LPC(20:4)	2.67807	2.70386	2.9159	2.38456	2.04098	1.40644	1.66	1.78946	1.5366	1.79658
LPC(20:5)	1.92293	2.132	2.2199	1.79949	1.55364	0.400748	0.584	0.808733	0.616326	0.722656
LPC(22:5)	1.70482	1.83606	1.81544	1.4705	1.29419	1.20978	1.45	1.73991	1.50038	1.57249
LPC(22:6)	0.480732	0.495788	0.596211	0.394433	0.345796	0.336859	0.432	0.455521	0.361205	0.416409
LPC(O-16:0)	2.02006	2.22005	2.56321	2.68473	43.3	2.39091	2.51	2.35452	2.82666	2.50214
LPC(O-18:0)	2.3664	2.89904	2.94188	2.8943	18.7356	2.63336	3.07	2.91356	2.79824	2.74893
LPC(O-18:1)	2.20918	2.4014	2.64387	2.62835	8.99562	2.52686	3	2.52383	2.46314	2.60745
LPE(16:0)	18.6768	20.5979	20.9	16.7964	15.7546	24.2	31.3	31.3	27.6	30
LPE(17:0)	0.958013	1.07258	0.840495	1.20985	1.71694	0.912403	1.05	0.885209	0.995324	0.836069
LPE(18:0)	121	123	126	108	101	126	161	156	140	155
LPE(18:1)	5.4593	4.93574	5.66278	4.38904	4.557	6.96016	9.58	10.0211	8.56006	9.74089
LPE(18:2)	0.662122	0.959602	0.968071	0	0.527866	2.47853	3.27	3.71606	3.08909	3.4851
LPE(20:1)	2.82736	3.2316	3.072	3.06515	0	3.04675	3.06	2.66456	3.17289	2.90972
LPE(20:4)	6.13818	6.13497	6.72723	5.48249	5.05537	2.38999	3.03	2.94696	2.8444	3.50146
LPE(20:5)	5.24271	5.1748	5.37258	4.61105	4.64971	2.04292	2.63	2.85696	2.3833	2.87912
LPE(22:5)	2.85814	3.1078	3.41961	2.79484	2.55894	2.50091	3.33	2.82611	2.87291	3.51559
LPE(P-20:0)	2.00923	2.34535	2.40622	2.34312	3.81278	2.16245	2.44	2.18947	2.57284	2.29366
PC(10:0_16:0)	0.088202	0.150407	0.17652	0.0584147	0.0825416	0	0	0	0.0499737	0.0534157
PC(10:0_18:1)	3.87	4.14	4.73	3.47	4	2.89	3.9	4.03	3.4	3.92
PC(10:0_19:0)	82.3	89.2	99.3	70.4	74.1	57.2	73.5	76.5	66.5	74.1
PC(10:0_21:0)	422	444	484	391	377	307	394	370	337	361
PC(10:0_22:0)	904	964	1010	843	814	618	817	768	673	724
PC(10:0_23:0)	225	244	263	217	213	165	214	203	182	192
PC(10:0_24:0)	323	345	367	293	292	211	273	264	236	250
PC(10:0_25:0)	49.2	55	62.1	46.8	45.5	35.9	46.1	46.7	40.7	47.8
PC(11:0_16:0)	0.343626	0.362857	0.429601	0.275966	0.34124	0.208051	0.273	0.33013	0.316667	0.34945
PC(11:0_25:0)	31.9	34.5	40	29.5	28.7	24.3	32	32.2	28.1	32.5
PC(12:0_17:1)	6.32	6.81	7.87	5.46	6.19	4.6	6.01	6.45	5.54	6.2
PC(12:0_18:1)	263	284	327	229	248	211	269	282	239	275
PC(12:0_18:2)	16.7	18.1	20.5	14.4	16.1	11.7	15.3	15.9	13.2	15.3
PC(12:0_18:3)	0.388579	0.47799	0.610703	0.366499	0.405694	0.272221	0.323	0.400033	0.310304	0.394059
PC(12:0_19:1)	283	303	330	258	264	254	325	321	277	309
PC(12:0_20:1)	3620	3910	4140	3340	3350	3240	4260	3940	3610	3840
PC(12:0_20:3)	49.7	55	61.7	43.9	46.8	35.3	45.3	47.6	40.2	46.5
PC(12:0_22:1)	5810	6250	6320	5750	5570	5070	6580	5980	5450	5660
PC(12:0_22:2)	3390	3540	3790	3200	3060	2920	3820	3600	3200	3540
PC(12:0_22:4)	95.5	105	119	84.4	87	66	85	90.4	74.9	88.1
PC(12:0_26:0)	0.811626	0.934289	1.09551	0.775583	0.653272	0.464748	0.722	0.723308	0.715363	0.688663
PC(13:0_18:2)	17	18.4	21	14.7	15.6	12.5	16.4	16.8	14.6	17.3
PC(13:0_20:1)	1020	1070	1160	964	943	925	1200	1150	1010	1120
PC(13:0_20:2)	227	241	265	212	211	216	282	267	234	259
PC(13:0_20:3)	22	24.8	28.1	19.8	20.6	17.9	23.1	25.2	20.3	23.9
PC(13:0_20:4)	0.586958	0.853338	1.04225	0.517289	0.725487	0.478034	0.69	0.628235	0.568216	0.584568
PC(13:0_22:1)	841	915	990	807	803	738	958	917	808	871
PC(13:0_22:2)	512	549	585	488	491	496	655	617	533	591
PC(13:0_22:4)	36.7	40.3	43.7	33.7	33.6	24.4	32.1	32.8	27.2	31.4
PC(14:0_14:0)	68.1	74.4	84.8	58.4	64	47.7	62	66.6	56.5	63.9
PC(14:0_16:0)	804	863	938	762	737	551	700	647	586	622
PC(14:0_20:3)	668	710	785	623	624	593	761	744	643	718
PC(14:0_20:5)	19.6	21.3	24.7	17.7	18.1	8.05	10.3	10.9	9.11	10.7
PC(14:0_22:4)	586	625	689	546	547	513	657	622	550	602
PC(14:0_22:6)	61.7	67.7	78.6	54.6	55.5	22.9	29.3	31.9	26.9	31.1
PC(14:0_24:1)	25.4	26.7	29.9	22.9	22.5	22.1	29.3	29.7	24.5	28.2
PC(14:0_26:0)	0	0	0	0	0	0	0	0	0	0
PC(14:1_22:2)	1920	2020	2180	1790	1790	1740	2290	2190	1870	2070
PC(14:1_22:6)	1.99	2.27	2.59	1.80591	1.89	0.307	0.409	0.760231	0.537389	0.855594
PC(15:0_20:5)	18	20.1	23.2	16.5	16.5	6.45	8.18	9.18	7.58	8.8
PC(15:0_22:1)	31.7	34.5	38.5	28.6	29.3	29.9	38.3	39.8	33.4	38.4
PC(15:0_22:2)	85	91.6	99	79.2	81.9	82	105	102	86.6	96.6
PC(15:0_22:4)	75.7	79.8	85.9	72.9	68	36.1	46.7	44.2	38.6	42.4
PC(15:0_22:6)	20.9	22.5	25.6	18.2	18.8	6.96	8.78	9.73	7.92	9.73
PC(15:1_22:2)	58.7	65.4	67.9	58	56.3	48.2	63.5	60.7	52.4	56.6
PC(15:1_22:4)	110	123	132	109	103	46.9	61	58.8	51.5	57.2
PC(16:0_20:4)	620	666	720	603	536	257	339	329	277	316
PC(16:0_20:5)	816	883	955	752	743	315	403	421	347	400
PC(16:0_22:5)	1420	1530	1630	1370	1310	671	878	856	732	812
PC(16:0_23:5)	38.9	43	44.7	37.9	36.8	24.4	33.2	31.5	26	29.4
PC(16:0_24:1)	1.59549	1.71471	2	1.42514	1.52616	1.37843	1.75	1.75218	1.55222	1.75302
PC(16:0_26:0)	0	0	0	0	0	0	0	0	0	0
PC(16:0_26:2)	0.243507	0.38722	0.463714	0.140935	0.291763	0.32454	0.141	0.438553	0.351555	0.521714
PC(16:1_22:2)	493	532	566	461	459	367	472	461	393	433
PC(16:1_22:6)	80.8	89.2	103	71.3	71.5	31.7	41.1	44.6	36.5	42.4
PC(16:1_24:1)	3.48	3.92	4.72	3.18	3.3	3.61	4.5	4.77	3.98	4.64
PC(17:0_20:0)	1.17991	1.34129	1.46476	0.872762	1.02745	0.729502	0.863	1.03689	0.923185	0.952738
PC(17:0_22:1)	0.642248	0.566676	0.648345	0.381906	0.443014	0.217466	0.449	0.495082	0.578113	0.597755
PC(17:0_22:2)	1.76111	1.81087	2.21	1.35278	1.55356	1.69457	2.08	2.36	1.78005	2.14
PC(17:0_22:4)	14.3	15.5	16.6	13.9	13.2	8.73	11.5	10.2	9.63	10.3
PC(17:0_22:6)	29.8	32.4	34.2	29	26.8	15.1	19	18.2	16	17.6
PC(17:1_22:2)	4.65	5.77	6.16	4.64	4.35	3.85	4.97	4.96	4.23	4.98
PC(17:1_22:6)	4.62	4.89	5.53	4.75	4.53	1.82	2.01	2.44	1.354	1.89
PC(18:0_18:1)	2610	2810	3010	2390	2430	2310	3000	2930	2570	2670
PC(18:0_20:4)	938	1030	1070	929	860	519	679	666	564	609
PC(18:0_22:3)	8.88	9.73	11.2	8.06	8.47	7.67	9.69	10.1	8.2	9.86
PC(18:0_22:4)	37.4	40.2	41.4	35.8	35.4	27.5	35.3	32.8	28.5	30.1
PC(18:0_22:5)	321	353	368	314	309	206	274	266	228	243
PC(18:0_24:1)	0.260945	0.403278	0.644961	0.303809	0.37456	0.241601	0.266	0.392841	0.286906	0.41575
PC(18:1_18:1)	4170	4560	4750	4090	4060	4010	5230	4920	4310	4630
PC(18:1_20:1)	110	117	128	98.9	104	113	143	144	121	133
PC(18:1_20:5)	659	702	775	623	601	270	348	347	296	328
PC(18:1_22:5)	329	345	368	308	303	175	225	218	188	207
PC(18:1_22:6)	159	169	183	146	145	84	107	102	89	97.6
PC(18:2_22:6)	55.9	60.7	69.2	49.6	49.3	24.6	31.6	33.7	28.3	32.1
PC(18:3_20:5)	0	0	0	0	2.19248	0	0	0	0	0
PC(18:3_22:6)	19.2	20.9	24	16.1	15.9	5.63	7.2	7.94	6.73	7.69
PC(18:3_24:1)	0.920466	0.9145	1.231	0.649351	0.863985	0.459741	0.519	0.776345	0.556477	0.774887
PC(18:4_22:6)	3.29	3.65	4.09	2.98	2.91	0.636119	0.854	1.04041	0.799506	0.931684
PC(19:0_22:2)	0	0	0	0	0	0	0	0	0	0
PC(19:0_22:6)	3.28	2.77	3.08	2.53	1.99	1.41752	1.85	1.4273	1.12692	1.30162
PC(19:1_22:4)	3	3.29	3.31	2.79	2.64	1.60504	2.39	2.28	2.11	2.31
PC(19:1_22:6)	0.980736	1.01473	0.97917	0.784185	0.556341	0.157739	0	0	0	0.386893
PC(20:0_22:5)	0	0	0	0	0	0	0	0	0	0
PC(20:0_22:6)	23.3	25.6	25.7	23.4	22.2	10.3	12.7	11.5	10.6	11.3
PC(20:0_24:1)	0.689406	0.825182	0.888182	0.653567	0.393343	0	0	0.0930951	0.149915	0.183578
PC(20:1_22:2)	0	0.115494	0.170036	0	0	0.05061	0	0.115539	0.139263	0.220221
PC(20:1_22:6)	8.04	8.31	8.9	8.12	7.22	4.13	6.06	5.52	5	5.27
PC(20:2_22:6)	17.2	17.1	18.7	14.5	14.3	10.2	13.7	12.4	11	11.2
PC(20:3_22:6)	24.5	27.4	28.1	21.8	21.8	9.96	12.8	13.1	11.3	12.1
PC(20:4_22:6)	26.4	28.9	32.6	22.5	21.9	7.71	9.64	10.6	8.4	9.61
PC(20:5_22:6)	6.37	6.84	7.7	5.36	5.44	1.53387	1.95	2.01	1.65911	1.93
PC(21:0_22:1)	0	0	0	0	0	0	0	0	0	0
PC(21:0_22:2)	0	0	0	0	0	0	0	0	0	0
PC(21:0_22:6)	0	0	0	0	0	0	0	0	0	0
PC(22:0_22:2)	0	0	0	0	0	0	0	0	0	0
PC(22:0_22:4)	0	0	0	0	0	0	0	0	0	0
PC(22:0_22:6)	0	0.188997	0.331913	0.0595015	0	0	0	0	0	0
PC(22:1_22:2)	0.103409	0	0.0848369	0.0704576	0.0689881	0	0	0	0	0
PC(22:1_22:4)	0	0	0	0	0	0	0	0	0	0
PC(22:1_22:6)	0	0	0	0.0560319	0	0	0	0	0	0
PC(22:2_22:6)	0	0	0	0	0	0	0	0	0	0
PC(22:4_22:6)	8.17	7.35	8.58	6.83	6.8	3.84	5.44	4.78	3.97	4.46
PC(23:1_23:1)	0	0	0	0	0	0	0	0	0	0
PC(O-14:0_15:0)	7.12	8.76	9.63	7.25	6.97	5.36	7.51	6	5.8	6.45
PC(O-14:0_16:0)	40	41.8	45.5	37.2	35.4	25.1	32.9	32.3	28.9	30.7
PC(O-14:0_18:0)	86.8	94.8	103	81.9	81.4	56.5	74.9	70.9	62.4	69
PC(O-14:0_18:1)	320	350	370	312	300	223	282	269	245	260
PC(O-14:0_18:2)	389	415	445	369	364	399	515	496	432	475
PC(O-14:0_18:3)	77.5	81.2	88.8	70.6	72.2	79.3	103	98	86.8	96.7
PC(O-14:0_20:4)	28.9	31.9	33.1	28.1	25.7	32.8	41.6	41.2	36.1	41.4
PC(O-14:0_22:0)	3.28	3.72	4.4	3.06	3.07	1.94	3.1	2.7	2.5	2.89
PC(O-15:0_20:4)	47.8	52.2	55.3	46.3	43.1	37.3	47.8	45.9	39.1	44.1
PC(O-16:0_12:0)	6.02	6.51	7.53	5.66	6.21	4.37	6.1	6.36	5.18	5.87
PC(O-16:0_14:1)	29.9138	25.2329	23.7372	26.3347	46.7378	25.2764	25.4	25.2478	25.0056	28.2893
PC(O-16:0_15:0)	13.4	14.4	14.1	14.6	12.5	11.7	16.2	14.1	10.9	13
PC(O-16:0_15:1)	552	599	651	538	536	491	642	614	539	583
PC(O-16:0_17:0)	22.9	24.8	27	20	20.6	15.9	20.4	20.1	17.4	18.9
PC(O-16:0_17:1)	101	113	123	94.8	95.5	74.5	98.7	97.7	85	91.3
PC(O-16:0_18:0)	36.3	40.1	45.7	32.9	33.6	21.2	27.6	28.3	24.5	28.3
PC(O-16:0_18:1)	953	1050	1090	1140	1690	941	1120	936	1090	1010
PC(O-16:0_18:2)	123	130	135	134	413	124	140	121	139	131
PC(O-16:0_18:3)	198	218	228	188	185	249	331	309	276	305
PC(O-16:0_19:0)	2.34	2.66	3.11	2.05	2.11	1.60826	1.87	2.09	1.79	2.25
PC(O-16:0_20:3)	62.6	65.4	65.7	66.7	163	62.4	68.5	60.3	70.6	65.1
PC(O-16:0_20:4)	141	152	158	133	125	85.4	114	108	93.2	99.8
PC(O-16:0_20:5)	155	171	184	153	144	62.2	82.5	79.3	66.9	73
PC(O-16:0_22:0)	0.522743	0.572257	0.678173	0.367146	0.458268	0.13328	0.121	0.160073	0.181169	0.323088
PC(O-16:0_22:1)	15.3	16.1	17	13.1	14.3	15.3	20.1	21	17.8	19
PC(O-16:0_22:4)	82.2	90.5	101	72.4	72.2	26.3	34.2	33.9	28.8	31.3
PC(O-16:0_22:5)	177	192	199	169	165	67.8	90.3	88.4	74.8	77.8
PC(O-16:0_22:6)	163	181	188	160	152	76.9	103	93.6	83.2	90.6
PC(O-17:0_20:4)	29.9	33.2	35.4	29.2	27.5	16.3	21.4	21	17.9	18.8
PC(O-18:0_17:2)	107	115	121	97.4	99.7	129	168	165	143	155
PC(O-18:0_18:1)	519	556	584	603	618	514	599	495	578	550
PC(O-18:0_22:1)	4.21	3.67	4.29	3.14	3.72	3.68	4.95	5.02	4.57	4.76
PC(O-18:0_22:2)	5.13	5.47	6.08	4.63	4.67	5.39	7.11	7.19	6.2	6.89
PC(O-18:0_22:4)	4.63	5.33	5.96	4.05	4.26	2.89	3.75	3.9	3.35	3.69
PC(O-18:0_22:5)	11.1	12.2	13.5	10.2	9.95	3.61	4.94	4.67	4.2	5.03
PC(O-18:0_22:6)	49.5	53.6	57.8	45	46.6	19.2	24.8	24.1	21	22.9
PC(O-18:1_18:1)	238	252	268	277	210	234	273	221	263	237
PC(O-18:2_24:0)	2.66	2.49	2.96	2.57	2.2	2.15	2.77	2.79	2.35	2.56
PC(O-20:0_20:3)	5.43	5.76	6.73	4.7	4.9	3.94	5.13	5.45	4.32	5.43
PC(O-20:0_22:4)	3.15	3.39	3.91	2.74	2.85	1.00812	1.39	1.76674	1.24855	1.81
PC(O-20:0_22:6)	4.5	4.88	5.55	3.86	4.26	1.62811	1.93	2.51	2.05	2.3
PC(O-22:1_22:3)	0	0.137266	0	0.0605205	0	0	0	0	0	0
PC(O-24:0_18:3)	1.90316	2.06	2.44	1.669	1.87	1.76779	2.19	2.41	1.99	2.27
PC(P-16:0_12:0)	21.7	23.6	26.9	19.1	20.6	16.9	20.8	21.9	18.6	21
PC(P-16:0_13:0)	105	113	123	99.4	98.6	90.8	113	111	96.8	106
PC(P-16:0_14:0)	238	256	279	229	219	189	243	231	205	225
PC(P-16:0_14:1)	56	61.6	66.8	52.5	52.9	51.7	66.7	68.2	57.1	64.1
PC(P-16:0_15:1)	163	180	192	152	150	171	220	207	184	198
PC(P-16:0_16:0)	200	214	227	192	192	205	271	256	225	245
PC(P-16:0_17:0)	48	51.9	56.5	47.4	46.7	53.1	75.1	66.4	59.3	64.7
PC(P-16:0_17:1)	222	244	252	216	210	272	361	335	294	322
PC(P-16:0_17:2)	110	118	124	104	104	132	171	162	145	156
PC(P-16:0_18:1)	447	483	523	419	425	528	683	661	578	637
PC(P-16:0_18:2)	19.4	19.5	22.3	20	18.6	20.2	26	24.8	21.2	24.9
PC(P-16:0_18:3)	30.9	32.2	34.8	30.1	27	25.4	30.4	30	25.7	26.8
PC(P-16:0_18:4)	26.4	31.4	36.1	26	24.3	10.4	13.1	14.6	12.2	14.3
PC(P-16:0_19:1)	29.6	32.4	35.1	28.8	28.7	37.2	46.9	46.8	40.2	42.5
PC(P-16:0_20:3)	18.4	19.5	22.2	15.5	17	9.18	19.9	18.6	15.7	19.9
PC(P-16:0_20:4)	79.3	113	118	97.4	74.6	51.6	62.6	63.1	55.5	63
PC(P-16:0_20:5)	218	240	254	203	192	75	95.5	90.6	82	86.5
PC(P-16:0_22:4)	83.2	90.7	94.4	81.1	78.6	35.4	44.9	48.5	38.4	39.6
PC(P-16:0_22:6)	6.18705	6.70666	6.36738	7.55284	24.7432	6.79779	7.6	6.3768	7.20372	6.55489
PC(P-18:0_17:2)	41.2	45.1	46	41.4	40.1	53.3	67.5	66.1	58.2	63.1
PC(P-18:0_18:1)	119	131	146	108	112	139	181	186	159	182
PC(P-18:0_20:5)	69.8	69.9	69.2	74.5	225	67.4	75.3	65.3	72.9	70.1
PC(P-18:0_22:4)	50.8	55	59.2	46.1	46.2	23.9	30.7	29.7	26	27.5
PC(P-18:0_22:6)	21	23.4	23.9	20.7	19.9	8.25	9.7	9.78	8	9.76
PC(P-18:1_18:1)	221	229	240	255	205	218	245	211	241	220
PC(P-20:0_20:5)	30.8	34.3	37.3	30.6	28.9	16.4	21.4	19.3	17.8	19
PC(P-20:0_22:4)	5.5	6.18	7.08	4.87	5.07	2.07	2.58	2.78	2.24	2.72
PE(14:0_16:0)	6.95782	7.08364	7.40447	6.29091	5.34686	5.45557	7.65	6.76066	7.57062	6.16074
PE(14:0_16:1)	0.638021	1.0227	1.01189	1.01321	2.38307	0.746396	0	0	0.686158	0.971675
PE(14:0_18:1)	109	112	113	99.6	90.9	116	143	162	135	165
PE(14:0_20:4)	0	0	0.795632	1.01192	2.69255	0.679123	1.12	0.574056	0.604821	1.23919
PE(15:0_16:0)	1.97483	1.76649	1.91632	1.77618	2.8815	1.45876	1.9	1.36623	0	1.93236
PE(15:0_18:0)	7.01876	7.51509	7.57341	8.00455	5.75059	6.73961	7.49	6.02626	8.38414	8.1104
PE(15:0_18:1)	6.62527	6.90847	8.34214	7.03033	6.01639	5.63287	7.52	4.65298	7.08382	6.66637
PE(16:0_16:0)	24.3819	23.7335	27.5321	25.0359	13.5692	21.8858	25.8	19.7539	25.4272	25.4203
PE(16:0_17:0)	7.40518	7.37453	8.61378	9.17197	4.00366	6.77687	8.27	6.27836	7.38009	7.77607
PE(16:0_18:0)	28.6	29.1	33.3	28.3	24.3	22.3	30.9	28.6	25.4	26.9
PE(16:0_18:1)	1340	1310	1460	1380	1200	1430	1740	1860	1600	1750
PE(16:0_18:2)	589	542	621	567	482	637	804	854	755	876
PE(16:0_18:3)	17.7992	17.2213	19.0293	18.5597	25.1701	16.915	18	15.4767	18.2287	18.6506
PE(16:0_20:4)	321	323	365	330	270	144	179	200	170	191
PE(16:0_20:5)	309	276	330	303	266	124	163	164	146	166
PE(16:1_16:1)	8.07706	8.51689	9.3927	9.37105	15.8458	7.32382	8.3	6.50923	8.71518	8.45987
PE(16:1_17:0)	37.3749	38.8846	41.4397	42.2	62.4	36.1924	38.9	34.4687	39.7427	39.7
PE(16:1_17:1)	0.923738	0	0.704667	0.738971	1.51269	0	0.612	0	0	0.605077
PE(16:1_18:2)	33.5993	35.3007	37.0749	38.3462	45.6	29.9029	37.1	31.4976	35.934	38.9573
PE(16:1_20:5)	0.638755	0	1.0042	0.979481	4.43284	0.647238	0.958	0.664999	1.1022	0.836554
PE(17:0_18:0)	10.8788	10.8631	11.0326	10.9285	2.44917	9.75054	10.1	8.79425	10.6623	10.0769
PE(17:0_18:1)	338	313	346	320	282	315	395	407	349	395
PE(17:0_18:3)	5.81054	5.53299	6.13791	5.76843	6.27671	5.41491	6.03	5.00417	4.84219	5.78801
PE(17:0_20:3)	27.745	29.2004	30.8602	31.0542	28.5512	25.5517	29.9	24.0436	28.4379	30.6228
PE(17:0_20:4)	33.0947	31.401	32.6028	32.8094	26.294	29.8041	33.2	29.0749	32.3536	34.4683
PE(17:0_20:5)	72.2	66.4	70.7	67.1	57.1	26.3	29.1	33.2	32.4	33.6
PE(17:1_18:1)	90.9	91.7	98.5	99	40.1	80.9	89.4	76.1	87.5	91.3
PE(17:1_18:2)	11.1932	11.2782	11.4232	12.4022	8.56816	9.75915	11	10.0353	11.2025	11.4616
PE(18:0_18:1)	2510	2510	2750	2530	2150	2350	2990	3140	2730	2910
PE(18:0_19:1)	61.2	62.5	64.1	68.8	14.7983	54.7	61.1	53	62.5	66.5
PE(18:0_20:1)	262	255	272	278	32.2943	229	257	218	256	267
PE(18:0_20:2)	20	21.5	17.5	18	19.7	22.7	22.6	30.2	24.4	28.8
PE(18:0_20:3)	441	411	477	422	376	342	440	467	394	449
PE(18:0_20:4)	2480	2410	2570	2500	2140	982	1240	1310	1110	1210
PE(18:0_20:5)	1930	1880	2080	1950	1680	778	1010	1010	893	1030
PE(18:0_22:2)	4.77423	0	3.56353	0	4.06415	1.61484	1.74	2.28998	1.68475	1.6892
PE(18:0_22:4)	68.5	64.1	68.7	69.8	20.7293	60.4	66.1	58.8	68.5	66.8
PE(18:0_24:1)	3.728	3.80855	4.404	4.02674	3.15387	1.96914	2.86	3.31925	2.6777	3.49559
PE(18:1_18:1)	2470	2360	2660	2470	2140	2830	3470	3690	3220	3530
PE(18:1_18:2)	318	320	340	308	278	410	529	568	452	562
PE(18:1_19:0)	83	81.8	94.6	90.4	8.79364	72.9	81.6	68.9	84.4	83.4
PE(18:1_19:1)	163	170	181	183	39.2082	147	165	140	167	169
PE(18:1_20:1)	34.3	30.5	40.5	36.6	27.3	40.4	53	52.4	41.1	47
PE(18:1_20:5)	451	415	465	444	365	223	267	282	236	254
PE(18:1_22:0)	27.268	27.0242	28.6891	29.4771	12.8798	23.6996	27.3	21.9086	26.4879	27.636
PE(18:1_22:2)	67.9	72.1	79	78.9	9.26038	61.3	71.1	59.4	73.6	73.5
PE(18:1_22:4)	1010	946	1080	972	877	629	772	803	700	783
PE(18:1_22:6)	51.2	51.2	55.5	56.4	26.4348	53.9	61.7	53	62.8	55.1
PE(18:2_20:5)	13.1722	13.6415	14.6818	14.4734	21.2287	14.2006	18.1	14.5958	15.4856	14.5023
PE(18:2_22:4)	132	130	147	135	110	95.4	128	127	105	129
PE(19:1_20:1)	20.2695	20.0931	21.8842	21.8976	2.43775	18.5415	20.9	17.0826	20.0113	20.8978
PE(20:0_22:6)	4.35344	4.34955	3.93832	5.01834	3.12929	2.94867	3.44	3.82642	2.86894	3.13596
PE(20:3_20:5)	4.11124	4.5815	4.18423	4.5544	2.33893	5.8512	5.87	5.40397	5.3201	4.34831
PE(20:4_22:0)	1.5446	1.83574	1.92377	1.40736	1.1047	1.67298	1.85	1.6618	1.60651	1.35341
PE(O-16:0_16:0)	9.5005	10.9576	11.1658	11.8873	4.12	9.61227	10.7	9.39916	11.7525	10.1004
PE(O-18:0_16:0)	33.6052	34.5156	38.331	39.3796	7.96192	30.6649	35.8	29.9394	35.5778	34.4695
PE(O-18:0_20:4)	88.6	53	0	0	77.9	82.2	0	43.7	90	48.2
PE(O-20:0_22:4)	3.87492	5.22563	5.6551	5.95909	1.39334	4.81304	5.23	4.1368	5.11883	5.20767
PE(P-16:0_14:0)	0.523568	0	0.7363	0.726394	0.604012	0.400615	0	0.445953	0.887391	0.573606
PE(P-16:0_16:0)	5.02109	4.29053	5.66528	4.62341	3.35627	4.9169	6.12	6.45454	4.81042	5.40748
PE(P-16:0_16:1)	32	31.2	35.3	32.6	29.3	60.9	78.2	81.9	69.4	80.5
PE(P-16:0_17:1)	44.8	48.7	53.3	54.4	48.2	38.4	44.9	37.9	44.9	45.6
PE(P-16:0_18:1)	239	233	255	232	207	426	528	567	497	550
PE(P-16:0_18:2)	130	126	140	138	117	360	426	448	403	445
PE(P-16:0_18:3)	29.6	26.7	32.4	28.6	22.9	66.6	84.6	91.3	80.7	94.9
PE(P-16:0_20:3)	139	142	147	147	123	261	313	387	302	310
PE(P-16:0_20:4)	828	790	878	815	648	397	509	520	458	525
PE(P-16:0_20:5)	1020	972	1090	995	808	466	603	630	573	676
PE(P-16:0_22:4)	73.5	77.6	78	70.2	69.8	99.9	122	138	114	140
PE(P-16:0_22:6)	208	206	235	210	184	75.9	97.1	95.5	81	90.9
PE(P-18:0_16:0)	18.3	17.5	20.3	17	14.5	13.1	17.5	18.7	15.3	18.9
PE(P-18:0_18:1)	340	323	368	322	289	519	658	705	602	706
PE(P-18:0_18:2)	328	308	336	307	273	730	916	951	847	894
PE(P-18:0_18:3)	65.8	61.4	63.7	60.9	56.2	125	168	175	152	165
PE(P-18:0_20:1)	31.5	26.5	31.7	27.4	22.9	41.4	51.2	58.4	50.1	56.8
PE(P-18:0_20:2)	339	379	401	391	69.9	325	378	311	386	376
PE(P-18:0_20:3)	301	289	337	296	256	391	494	539	456	534
PE(P-18:0_20:4)	1780	1720	1830	1720	1450	789	975	1050	914	1000
PE(P-18:0_20:5)	1570	1510	1650	1660	1330	736	903	946	860	891
PE(P-18:0_22:2)	3.33027	3.63133	3.75369	3.07877	2.41684	7.79537	10.2	11.2	9.31105	10.3346
PE(P-18:0_22:4)	72	70.9	82.5	68.5	60.6	54.4	67.2	74.8	63.9	73
PE(P-18:0_22:6)	336	322	361	315	291	101	125	133	115	130
PE(P-18:1_22:6)	30.6	27.4	29.5	25.8	25.2	10.7	12.5	14.8	11.6	14.8
PE(P-20:0_16:0)	8.20375	9.22154	10.3077	10.0611	0.584285	7.94081	9.71	7.962	9.70127	8.95211
PE(P-20:0_20:4)	89.4	82.6	99.7	84.2	71.1	34.2	42.7	45.6	39.2	46.2
PE(P-20:0_22:4)	3.09523	2.81638	3.68818	2.62276	2.32899	2.18929	2.78	3.39034	2.98531	4.00936
PE(P-20:0_22:6)	4.59703	4.72402	4.80908	4.70287	8.95714	4.10585	4.89	4.16029	4.64671	5.10212
PG(16:0_16:1)	11.2839	11.8637	11.7612	11.5987	19.0486	10.336	11.2	9.9325	12.0846	11.148
PG(16:0_18:2)	6.757	6.50842	8.06362	8.02499	8.47817	7.56931	7.48	6.75055	7.79106	6.9558
PG(16:1_18:1)	7.55121	10.3388	10.039	8.02714	9.32159	9.30388	9.95	8.16793	10.5332	7.33993
PG(18:0_18:2)	0	0	0	0	0	0	2.96	3.07829	0	0
PG(18:0_20:4)	2.06533	2.4378	2.48703	2.20475	1.41798	2.53214	1.43	2.31151	1.96891	2.19579
PG(18:1_16:0)	310	309	330	335	308	286	325	289	331	312
PG(18:1_17:0)	32	31.6	34.2	33.9	27.2	29.2	33.8	30.7	33.5	32
PG(18:1_18:0)	194	198	208	209	76.5	187	206	187	215	204
PG(18:1_18:1)	132	132	143	146	50.3	107	128	107	125	126
PG(18:1_18:2)	30.1	29.4	30.2	31.7	11.1243	23.8308	27.1	24.4	26.2074	27.2
PG(18:1_18:3)	10.7063	10.0779	9.88289	10.5986	3.82299	8.4135	9.41	8.34534	8.6709	9.75492
PG(18:1_20:3)	7.09948	7.03335	6.73859	7.23483	0.738327	5.14617	7.09	5.26457	6.72154	6.69787
PG(18:1_20:4)	7.38407	7.14732	7.87002	7.92951	1.55793	5.97152	7.43	6.53236	7.30394	7.27569
PG(18:1_20:5)	0	0	0	0	0	0	0	0	0	0
PG(18:1_22:6)	18.6137	17.8206	18.0311	18.4476	8.72514	16.7973	18.6	17.2676	18.952	18.5821
PG(18:2_18:2)	2.61354	2.20659	2.59047	2.67327	4.87452	2.2514	2.65	2.47114	2.96878	2.09256
PG(18:2_18:3)	0	0	0	0	0	0	0	0	0	0
PG(18:2_20:4)	0	0	0	0	0	0	0	0	0	0
PG(18:3_22:6)	0	0	0	0	0	0	0.339	0	0	0
PG(20:3_22:6)	0	0	0	0	0	0	0	0	0	0
PG(20:4_22:6)	0	0	0	0	0	0	0	0	0	0
PG(20:5_22:6)	0	0	0	0	0	0	0	0	0	0
PG(22:6_22:6)	2.54978	1.79405	1.97787	2.33705	0.57276	1.01348	1.35	0.999696	0.98022	2.32396
PI(14:0_18:1)	4.55627	3.67207	3.62805	5.07997	16.0658	3.88857	3.41	3.13027	3.16926	4.07183
PI(16:0_16:0)	8.89204	7.57604	7.49773	8.26708	18.2453	6.88065	7.25	6.48638	6.62616	8.68262
PI(16:0_16:1)	1.59053	1.55195	1.73909	1.75094	5.63174	1.69653	0.944	1.35572	0.817317	1.35726
PI(16:0_18:0)	13.0073	11.6386	10.6863	11.8846	11.1303	11.4826	9.91	10.2913	9.16484	12.5629
PI(16:0_18:1)	104	93.2	94.1	106	164	93.8	87.5	84.8	79.7	95.9
PI(16:0_20:3)	13.8668	10.7304	12.3525	12.0477	23.7918	10.9763	10.2	10.0368	9.28684	11.2775
PI(16:0_20:4)	8.64774	7.85472	8.32409	8.87683	22.053	8.50052	8.25	7.24566	7.15627	7.82223
PI(16:0_20:5)	0.745292	0.602716	1.13729	0.742628	4.29582	0.880187	1.2	1.06468	0.884479	1.18394
PI(16:0_22:6)	1.04023	0.775307	1.45419	1.60193	2.70027	1.42458	1.53	1.00675	1.59897	0.341209
PI(16:1_18:1)	36.4481	33.3744	34.8939	39.2471	66.3	33.3252	33.5	27.8521	27.7638	33.7129
PI(17:0_18:1)	17.1428	15.7259	16.597	19.0956	24.8136	16.2528	15.2	14.5439	14.2182	16.8829
PI(17:0_20:4)	4.08585	3.06252	3.40357	3.97048	5.74763	3.59872	3.31	2.72958	2.71258	2.92049
PI(17:1_18:0)	0	0	0	0.0360339	0	0	0	0	0	0
PI(17:1_18:1)	5.58851	3.74612	3.97573	4.04261	6.45602	3.8393	3.29	3.95284	4.12801	4.13345
PI(18:0_18:1)	356	332	340	357	272	326	306	286	286	345
PI(18:0_18:2)	409	393	409	449	311	377	360	318	320	379
PI(18:0_18:3)	48.3	48.4	46.6	54.6	42.3	44.9	41.9	37.5	36.9322	48.7
PI(18:0_19:1)	18.0572	16.1737	16.6043	18.5824	9.02363	16.2259	15.1	14.1243	14.379	18.3781
PI(18:0_20:1)	83	75.7	82.2	87.5	18.2001	75.1	73.8	70.1	66	84.9
PI(18:0_20:2)	378	370	395	435	92.2	355	347	315	322	384
PI(18:0_20:3)	256	239	252	273	282	241	227	209	205	241
PI(18:0_20:4)	392	342	344	399	278	367	349	320	310	351
PI(18:0_20:5)	52.4	50.5	52.6	54	54	59.4	53.9	52.2	53	52.6
PI(18:0_22:1)	5.86205	5.52601	6.3512	7.08303	0	4.89033	5.54	4.68282	4.69317	6.21115
PI(18:0_22:2)	39.7597	40.9347	46.3	47.2	4.38868	38.8	39.5	34.7723	34.4387	40.5
PI(18:0_22:4)	28.2453	26.2586	18.87	28.3607	13.8545	28.5948	24.4	25.349	25.6328	26.7045
PI(18:0_22:6)	32.759	31.3909	33.8351	37.1953	20.4362	37.1426	35	31.3417	30.8816	32.671
PI(18:1_18:2)	16.5964	13.5978	16.3251	15.4244	19.871	14.4562	13.8	12.2288	11.4636	14.334
PI(18:1_19:1)	12.9703	12.9338	14.2014	14.3702	6.56291	12.5198	12.2	10.7902	11.0919	12.3741
PI(18:1_20:1)	36.1955	29.98	32.3139	32.2393	7.22245	32.1615	28.2	23.8348	24.9555	32.1164
PI(18:1_20:3)	16.8856	15.3219	15.3822	17.5648	18.6084	13.8024	13.7	12.9312	11.3972	14.5758
PI(18:1_20:4)	106	102	103	114	80.6	115	110	95.8	95.3	101
PI(18:1_20:5)	19.2301	18.2141	19.4881	20.9096	18.9333	21.7045	22.3	18.3846	19.1418	19.0049
PI(18:1_22:2)	31.2938	32.9382	33.0923	35.996	14.1036	30.5404	29.3	25.8704	24.6565	30.7781
PI(20:1_20:4)	82.5	80.8	81.8	87.7	41.5	85.2	78.7	75.3	73.5	79.1
PS(16:0_16:1)	0	0	0	0	15.2111	0	0	0	0	0
PS(16:0_18:1)	27.0668	24.7024	23.9079	26.8421	90.7	23.7357	23.7	20.4672	20.0586	24.4511
PS(16:0_18:2)	0.872841	0.630613	0	0.670417	12.1299	0.562625	0	0	0	0.869903
PS(18:0_18:1)	335	315	302	353	323	298	295	254	253	332
PS(18:0_18:2)	91.7	88.9	83.2	98.3	157	83.6	82	71.3	69.9	86.9
PS(18:0_18:3)	1.22078	0.63191	2.37893	1.42077	8.83552	1.52769	0.896	0.776018	0.330226	1.97691
PS(18:0_22:6)	9.42303	9.17544	8.21802	11.7226	18.6206	10.743	10.6	8.3443	9.26578	10.4555
SM 32:0	3.01	3.3	3.65	2.48	2.63	2.1	2.65	2.99	2.53	3
SM 32:1	39	41.6	45.5	33.6	35.8	27.3	36.8	38.3	33.5	39.5
SM 33:0	2.56	2.85	2.83	2.36	2.2	1.78902	2.29	2.4	2.04	2.43
SM 33:1	89.7	96	105	77.8	81	63.1	86.2	90.3	78.2	91.8
SM 33:2	0.985678	1.23526	1.29818	0.801564	1.03651	0.659065	1.01	1.11952	0.964617	1.03851
SM 34:0	219	223	230	187	200	160	220	198	187	205
SM 34:1	1860	1820	1990	1650	1680	1350	1810	1730	1540	1730
SM 35:0	7.09	7.48	7.62	6.18	6.55	5.11	6.71	6.48	5.85	6.41
SM 35:1	76.7	78.3	82.3	66.1	68	50.4	70	63.9	59.8	70.3
SM 36:0	29.7	32.3	32.4	30.6	29.5	24	32.6	30	26.5	29.7
SM 36:1	277	292	305	254	262	193	269	239	223	257
SM 36:2	55.7	58.7	60.7	50.3	50.1	44.2	58	53.5	50.6	54.9
SM 38:0	33.8	35.6	35.7	28.6	31.1	21.5	29.6	29.5	25.7	28.3
SM 38:2	2.19108	3.13	3.2	2.61	2.87	1.96	3.16	2.91	2	2.48
SM 40:0	23.9	24.9	27.8	20.3	21.1	16.4	22	22.5	19.5	23.5
SM 40:1	134	142	160	116	122	90.6	123	121	108	131
SM 40:2	24.5	26	29	22	23.5	18.4	25.3	24.3	22.6	24.8
SM 41:1	36.5	37.1	41	30.4	32	24.4	32.9	33.2	30	34.8
SM 41:2	14.4	15.2	17.2	12.4	13.1	10.8	14.6	15.2	13.3	16.1
SM 42:1	99.3	105	118	85.5	92.3	66.3	92.8	90.3	80.4	93.9
SM 42:2	153	160	179	130	144	119	162	158	140	168
SM 43:1	4.07	4.37	4.8	3.73	3.7	2.46	3.55	3.61	3.17	3.81
SM 43:2	4.89	5.27	5.88	4.16	4.47	3.56	4.79	4.86	4.29	5.04
SM 44:0	1.1807	1.45676	1.76402	1.076	1.14622	0.46766	0.714	0.897412	0.727339	0.905532
SM 44:2	1.79107	2.06406	2.49	1.52945	1.64049	1.32364	1.71	1.91052	1.45961	1.94283
TG(12:0_12:0_14:0)	1.5837	1.48647	1.45125	1.60421	1.45856	1.52604	1.9	1.48516	1.37488	1.40717
TG(12:0_12:0_16:0)	3.61	3.55	3.47	3.51	3.05	3.57	3.47	3.51	3.09	3.32
TG(12:0_14:0_15:0)	2.65	2.45	2.35	2.2	2.09	2.17	2.48	2.4	2.11	2.18
TG(12:0_14:0_16:0)	20.2	19.5	19.4	18	16.4	16.7	19.8	20.8	17.7	18.7
TG(12:0_14:0_16:1)	10.2	9.88	9.97	8.53	8.19	8.02	8.96	9.6	8.56	8.83
TG(12:0_14:0_18:1)	87.5	84.3	85.2	76.6	70.2	72.3	89.1	91.2	80	85.2
TG(12:0_14:1_16:1)	2.29	2.10935	2.19	1.75909	1.70157	1.69921	1.82	2.03	1.75248	1.77145
TG(12:0_15:0_18:1)	11.6	12	12.4	10.2	9.31	10.7	12.8	14.3	11.8	11.6
TG(12:0_16:0_17:0)	22.6	20.9	20.4	21	17.3	22.1	28.2	23.7	23.5	26.3
TG(12:0_16:0_20:5)	13.5	13.1	14.9	12.1	11.4	4.37	5.38	5.64	5.03	6
TG(13:0_14:0_16:0)	14.2	13.7	13.9	12.5	11.5	12.1	14.6	14.4	13.4	13.6
TG(14:0_14:0_16:0)	89.1	86.1	87.8	80.4	72.6	76.3	97.7	96.2	86.6	88.2
TG(14:0_14:0_17:0)	25.6	26.6	27.1	24.8	22.5	25.9	31.8	32.6	29.4	28.4
TG(14:0_14:1_15:0)	9.89	8.5	8.55	7.33	6.96	6.95	8.47	8.7	7.46	7.96
TG(14:0_14:1_18:2)	48.9	47.1	47.6	42.2	38.7	32.7	41.4	41.7	36.8	39.3
TG(14:0_15:0_16:0)	5.65	5.14	4.86	4.02	4.26	5.71	7.21	5.61	5.26	5.19
TG(14:0_15:0_16:1)	41.1	36.8	37	34	29.5	33.2	39.6	39.5	37.2	38.5
TG(14:0_15:0_20:5)	4.78	4.93	4.43	3.98	3.43	2.2	2.44	2.47	2.22	2.42
TG(14:0_15:0_22:5)	76	81.5	83.5	73	62.8	38	48.3	48.1	43.2	44.2
TG(14:0_16:0_16:1)	382	379	373	345	314	350	453	431	404	410
TG(14:0_16:0_18:1)	1000	1040	1010	1020	859	1040	1390	1230	1180	1190
TG(14:0_16:0_20:4)	74.3	73.3	73.6	67.4	58.5	38.9	49.1	54.2	52.2	49.6
TG(14:0_16:1_17:0)	56.7	61.7	66.4	57.8	51.4	72	78.3	80.6	69.2	77.9
TG(14:0_16:1_17:1)	108	99.4	104	89.8	80.6	89.3	113	110	100	101
TG(14:0_16:1_18:1)	742	747	756	698	633	716	901	863	796	834
TG(14:0_16:1_18:3)	74.3	76.7	79.1	67.8	60.5	45	56.7	59.2	50.8	55.2
TG(14:0_16:1_20:5)	45.2	46.5	49.1	41.8	36.2	13.8	17.3	18.4	16	17.3
TG(14:0_17:0_18:0)	11.5	12	11.8	10	9.95	12.3	14.6	11.1	10.3	11.2
TG(14:0_17:0_18:1)	177	200	202	184	155	205	276	254	235	214
TG(14:0_18:1_18:3)	327	338	349	312	269	240	313	309	275	285
TG(14:0_18:2_20:4)	111	111	115	102	87.7	60.3	68.7	73.3	63.4	70.2
TG(14:1_15:0_16:1)	19.6	16.6	16.8	14.7	13.4	13.6	16.4	16.6	14.4	15.5
TG(14:1_15:0_18:2)	27.3	25.3	26.7	22.9	20.7	18.4	23.1	23.6	20.9	21.8
TG(14:1_16:0_16:1)	182	176	181	163	144	150	184	186	170	176
TG(14:1_16:0_18:2)	253	255	262	232	201	189	235	241	219	227
TG(14:1_18:0_18:4)	112	112	117	104	91.5	63.7	79.7	83.9	72.3	76.2
TG(15:0_15:0_16:0)	214	218	218	216	182	212	283	251	227	247
TG(15:0_15:0_17:0)	8.26	8.99	8.71	7.64	7.39	7.93	11.6	10.3	8.91	10.4
TG(15:0_16:0_16:0)	121	126	120	123	102	137	171	148	144	144
TG(15:0_16:0_16:1)	146	137	135	137	116	141	187	167	168	166
TG(15:0_16:0_17:0)	44.2	47.1	51.2	45	37.2	58.5	63.3	63.8	55.3	61.9
TG(15:0_16:0_18:1)	359	372	358	352	305	400	486	430	439	451
TG(15:0_16:0_22:5)	78.2	83.9	79.9	72.6	65	41.6	56.9	54.7	51	48.3
TG(15:0_16:1_18:1)	372	382	372	359	316	387	493	458	435	439
TG(15:0_16:1_18:2)	131	131	132	116	107	109	137	136	122	125
TG(15:0_16:1_18:3)	38.1	39.3	40.3	35.2	31.4	26.2	32.5	34.1	29.7	30.7
TG(15:0_16:1_20:5)	24.5	26.3	27.1	22.6	20.3	8.37	10.1	10.5	9.18	9.94
TG(15:0_17:0_18:0)	643	670	635	655	558	623	800	691	537	695
TG(15:0_17:0_19:1)	49.7	55.1	50.3	44.3	44.6	48	67.7	46.3	55.8	52
TG(15:0_18:1_18:3)	160	169	169	149	133	122	156	150	135	140
TG(15:0_18:1_22:5)	182	200	194	185	161	75.8	101	90.8	86.2	88
TG(15:0_18:2_20:5)	27.2	29.5	30	25.8	22.1	7.9	10	10.4	8.95	9.58
TG(15:0_18:2_22:5)	80.8	85	86.5	76.9	64.9	24.1	30.2	31.6	26.1	28.6
TG(16:0_16:0_16:0)	359	358	385	364	298	364	465	384	339	386
TG(16:0_16:0_17:0)	264	265	269	257	225	274	345	310	267	291
TG(16:0_16:0_18:1)	1900	1980	2000	1900	1620	2030	2520	2100	2130	2080
TG(16:0_16:1_18:1)	1930	2020	1940	1950	1670	2020	2660	2380	2320	2260
TG(16:0_16:1_18:2)	970	1020	1020	969	846	920	1160	1090	1020	1060
TG(16:0_16:1_20:5)	172	194	200	179	139	51.4	68.1	69.1	63.6	63.6
TG(16:0_17:0_18:0)	320	338	352	321	275	319	409	375	290	374
TG(16:0_17:0_18:1)	370	372	362	355	323	374	486	409	416	389
TG(16:0_17:0_19:0)	33.9	34.2	40.4	34.2	29.6	35.3	43.7	40.8	32.1	43.7
TG(16:0_17:0_22:5)	317	344	336	315	272	170	220	197	186	191
TG(16:0_17:1_18:0)	619	664	653	605	532	655	819	779	699	716
TG(16:0_17:1_18:1)	930	979	979	911	814	1000	1250	1140	1120	1110
TG(16:0_17:1_22:6)	23.9	25.2	24.4	23.7	19.6	5.13	7.3	5.86	6.44	6.99
TG(16:0_18:0_18:0)	660	640	669	650	532	582	765	676	455	665
TG(16:0_18:0_18:1)	2450	2650	2380	2460	2130	2300	2990	2540	2480	2600
TG(16:0_18:0_19:0)	82.6	86.1	95.1	80.3	70.5	75.7	102	97.1	69.7	98.9
TG(16:0_18:0_20:4)	1960	2110	2090	1960	1710	1570	1960	1770	1730	1720
TG(16:0_18:0_21:0)	4.64	4.36	4.92	4.22	3.75	4.1	5.06	4.84	3.2	4.56
TG(16:0_18:0_22:0)	12.1	12.7	13.7	11.7	10.4	11.4	14.1	13.8	9.14	14.1
TG(16:0_18:0_22:5)	356	402	374	365	319	136	166	146	145	141
TG(16:0_18:1_18:1)	3480	3590	3610	3420	3020	3490	4370	3700	3770	3610
TG(16:0_18:1_18:2)	2320	2480	2400	2350	2020	2260	2910	2580	2540	2460
TG(16:0_18:1_18:3)	1220	1290	1270	1230	1060	992	1270	1200	1130	1150
TG(16:0_18:1_22:5)	1190	1240	1230	1210	1020	501	652	606	584	567
TG(16:0_18:2_22:5)	728	785	802	746	618	272	340	321	296	320
TG(16:0_20:2_20:3)	312	286	333	257	233	171	199	200	177	199
TG(16:0_20:4_20:5)	32	40.3	40.9	35.7	27.7	11.8	14.4	14.8	13.6	15.3
TG(16:0_20:4_22:6)	18.7	18.1	18.9	16.6	13.8	4.1	5.09	5.79	4.86	5.39
TG(16:0_20:5_22:5)	87.8	93.6	95.7	86.8	66.8	21.8	27	27.9	25.4	26.9
TG(16:0_22:5_22:6)	38.4	39.3	40.7	36.3	29.5	6.36	7.93	8.9	6.96	7.85
TG(16:1_17:1_18:1)	395	417	405	389	342	381	488	461	433	433
TG(16:1_18:0_18:4)	721	756	776	693	586	382	488	490	436	459
TG(16:1_18:0_20:4)	1730	1820	1810	1740	1470	975	1250	1200	1120	1110
TG(16:1_18:1_19:1)	239	248	241	237	219	275	308	301	270	296
TG(16:1_18:1_20:4)	1160	1240	1260	1160	966	460	573	566	506	535
TG(16:1_18:1_20:5)	396	416	434	383	317	118	144	152	135	141
TG(16:1_18:1_22:6)	390	410	422	379	316	109	139	141	124	129
TG(16:1_20:5_22:5)	30.4	32.7	34.5	29.7	23.8	7.07	9.22	9.68	8.04	9.23
TG(17:0_17:0_18:1)	123	130	119	121	112	123	168	163	152	142
TG(17:0_17:1_19:1)	99.9	105	93.1	81.5	80.6	89.7	117	91.3	95.3	97.1
TG(17:0_18:0_18:1)	655	713	720	647	565	647	838	773	722	756
TG(17:0_18:0_22:5)	69.7	77.3	74.7	69.6	59.3	28	38.9	34.7	33.6	32.6
TG(17:0_18:1_18:1)	786	835	832	762	674	776	985	933	846	878
TG(17:0_18:1_18:2)	349	363	379	334	294	299	390	345	351	328
TG(17:0_18:1_20:0)	79.5	80.5	85.3	72.2	65.8	73.6	97.8	91.9	85.9	91.5
TG(17:0_18:1_20:5)	51.2	52.1	57.3	49.3	40.6	11.8	14.9	16	13.4	15.1
TG(17:0_18:1_22:1)	57.4	60.2	57.9	56	49.6	53.9	71.5	59.9	65.2	66.4
TG(17:0_18:1_22:5)	187	197	203	181	160	68.7	91.3	78.7	77	77.1
TG(17:0_20:3_22:5)	33.1	36	34.7	32.1	29.3	9.03	12.8	11.4	10.3	11.1
TG(17:0_20:5_22:5)	8.4	8.76	8.3	7.75	6.41	1.97	2.43	2.52	2.07	2.05
TG(17:1_18:0_18:2)	107	120	115	101	95.5	103	145	120	119	117
TG(17:1_18:0_18:3)	88.5	80.7	86	74.7	70.9	65.4	84.8	82.8	82.9	74.7
TG(17:1_18:1_18:2)	216	241	232	214	193	184	239	213	195	201
TG(17:1_18:1_18:3)	47.7	51.8	52.6	46	42.3	36.8	41.1	39.8	34.4	38.9
TG(17:1_18:1_22:5)	108	116	114	109	95	37.4	48.4	45.2	41.3	41.9
TG(17:1_18:1_22:6)	30.9	31.9	32.2	26.3	24.8	6	7.74	7.33	7.15	7.33
TG(17:1_18:2_18:3)	128	134	140	120	106	45.6	58.5	58.3	51.3	54.8
TG(17:1_18:2_22:5)	40.9	43.9	43.4	39.9	34.7	14.8	20	19.2	16.2	17.4
TG(18:0_18:0_18:0)	124	126	141	127	104	108	140	134	85.3	133
TG(18:0_18:0_18:1)	1550	1570	1540	1480	1240	1360	1770	1580	1550	1530
TG(18:0_18:0_22:5)	89.7	104	88.7	88.6	78	31.9	41.9	37.1	36.8	37
TG(18:0_18:1_18:1)	2970	3260	2910	2950	2580	2660	3470	2980	2960	3020
TG(18:0_18:1_18:2)	2060	2230	2130	2070	1890	1760	2180	2020	1860	1860
TG(18:0_18:1_19:1)	339	374	357	332	306	334	438	379	369	385
TG(18:0_18:1_20:0)	160	167	176	155	134	149	192	185	177	180
TG(18:0_18:1_20:1)	398	408	408	369	329	392	505	467	453	452
TG(18:0_18:1_20:2)	280	322	291	275	257	264	356	307	307	307
TG(18:0_18:1_20:3)	218	221	239	201	171	165	231	209	198	228
TG(18:0_18:1_20:5)	313	326	341	343	285	94.9	114	97.7	97.5	103
TG(18:0_18:1_21:0)	12.7	11.8	11.8	10.1	9.54	11	13.3	13.1	12.6	12.8
TG(18:0_18:1_22:0)	28	30	30.6	25.9	23.4	25.8	32.3	32.2	30	31.9
TG(18:0_18:1_22:1)	85.8	91	94.6	82.4	73.5	84.8	108	107	103	102
TG(18:0_18:1_22:5)	502	532	516	485	440	159	190	170	173	162
TG(18:0_18:1_22:6)	184	204	204	185	164	34.9	43.4	40.1	37.4	38.7
TG(18:0_18:2_20:1)	240	257	268	231	199	204	250	222	214	239
TG(18:0_18:2_20:5)	348	374	353	352	298	73.5	90.3	98	80.1	74.8
TG(18:0_18:2_22:4)	48.7	46.7	37.6	42.4	39.4	18.8	24.7	22.2	21.4	20.9
TG(18:0_18:2_22:5)	211	225	242	207	202	73.7	91.3	86.6	74	80
TG(18:0_20:0_20:1)	4.06	3.87	4.51	3.46	2.81	4.52	4.86	5.1	4.16	5.18
TG(18:0_20:1_20:3)	37	45.4	43.7	35.8	34	34.9	44.4	29.9	29.7	29.8
TG(18:0_20:1_22:5)	27.7	32	29.4	26.6	25	8.84	11	10.7	10.1	11.2
TG(18:0_20:3_22:4)	28.2	28.3	30	26.7	24	8.83	11.9	10.3	10.4	10.2
TG(18:0_20:3_22:5)	48.1	50.7	51.8	46.4	39.2	14	17.1	17.3	15.3	16
TG(18:0_20:4_22:5)	48	52.1	47.6	42.5	38.6	12	17.6	16	14.8	14.5
TG(18:0_20:5_22:5)	34.1	35.8	33.9	34.6	27.7	7.05	9.41	8.26	9.01	8.4
TG(18:0_22:1_22:5)	7.01	7.18	7.29	6.53	5.72	2.5	3.03	2.77	2.58	2.71
TG(18:0_22:3_22:5)	3.34	4.36	3.73	3.43	3.18	1.01402	1.51	1.13677	0.720794	1.04209
TG(18:0_22:4_22:5)	7.01	6.91	7.17	5.59	5.61	1.72022	2.55	2.18	2.02	2.07
TG(18:0_22:5_22:5)	19.2	21.8	19.8	20.8	16.1	4.14	4.87	5.04	5.58	4.7
TG(18:1_18:1_18:1)	835	737	830	717	627	802	1060	781	922	798
TG(18:1_18:1_20:1)	108	104	102	110	87.6	112	133	121	116	123
TG(18:1_18:1_20:2)	528	565	538	512	441	357	449	392	368	363
TG(18:1_18:1_22:4)	157	169	170	156	135	45.7	79.3	51.9	69.4	50.1
TG(18:1_18:1_22:5)	427	472	426	442	349	141	185	165	165	155
TG(18:1_18:1_22:6)	273	284	274	271	234	62.6	82.6	78.9	73.4	71
TG(18:1_18:2_19:0)	225	238	229	209	192	199	263	236	224	225
TG(18:1_18:2_19:1)	194	199	199	185	161	142	177	159	154	150
TG(18:1_18:2_20:2)	280	340	351	322	276	204	268	230	245	225
TG(18:1_18:2_22:6)	21.6	22.8	25.9	25.5	16.9	7.92	9.71	8.83	8.63	8.37
TG(18:1_18:3_22:5)	178	197	195	177	145	51.9	65.9	64.8	54.7	63.7
TG(18:1_19:0_22:1)	4.1	3.98	4.34	3.59	3.39	3.99	4.79	4.86	4.28	4.32
TG(18:1_19:0_22:5)	20.9	22.7	23.7	21	18.5	7.94	9.87	9.52	8.64	9.21
TG(18:1_19:1_20:0)	24.2	24	25.3	21.7	20.1	22.4	28.8	28.6	25.9	27.5
TG(18:1_19:1_20:1)	31.8	32.1	33.3	28.9	27.3	30.7	38.3	34	32.5	33.1
TG(18:1_19:1_20:2)	30.1	32.5	37.6	26.3	26.1	23.3	31.7	28.5	26.2	29.2
TG(18:1_19:1_20:3)	19.7	23.4	23.6	18.3	19.1	10.8	19.5	8.22	12.9	11.3
TG(18:1_19:1_22:1)	8.6	8.9	9.17	7.89	6.94	7.54	9.96	9.5	9.05	9.38
TG(18:1_19:1_22:2)	5.39	4.67	5.22	4.53	4.6	2.17	3.55	3.33	3.57	3.32
TG(18:1_19:1_22:4)	19.9	22	20.9	19.3	17.8	7.49	8.67	7.47	6.72	8.43
TG(18:1_19:1_22:5)	72.4	76.2	75.9	68.1	63.8	23.9	32.7	28	26.2	28.4
TG(18:1_20:1_20:1)	84.4	87	87.4	76.9	70.1	80.4	104	98.9	94.5	94.9
TG(18:1_20:1_20:2)	18.7	19.7	20.4	17.4	16.4	9.79	14.9	14.3	7.39	10.9
TG(18:1_20:1_20:3)	42.4	43.8	40.3	43.9	40.3	26.8	31.1	33.4	25.1	27.5
TG(18:1_20:1_22:0)	7.55	8.76	8.69	6.75	6.46	8.47	10.2	10.8	9.92	9.89
TG(18:1_20:1_22:1)	29.8	31.1	32.1	28.4	25.5	30	36.6	36.5	34.8	35.6
TG(18:1_20:1_22:3)	19.2	20.7	21.7	18.7	16.7	11.8	14.6	13.6	12.3	13.4
TG(18:1_20:1_22:4)	17.3	15.9	18.3	16.2	14.3	7.88	10.7	10	8.41	9.61
TG(18:1_20:1_22:5)	7.59	6.09	10.4	10.4	7.88	3.82	3.11	2.84	3.37	5.26
TG(18:1_20:2_20:2)	153	162	167	146	122	66.7	89.3	78.9	78	75.8
TG(18:1_20:2_22:1)	19	19.9	20.8	17.5	16.5	15.7	19.5	19.1	17.8	17.7
TG(18:1_20:2_22:4)	29.4	29.4	24.8	23.2	21.5	11.1	12	10.5	10.4	8.72
TG(18:1_20:3_20:4)	124	131	129	127	102	46.4	62.7	54.8	54.6	56.5
TG(18:1_20:3_22:4)	46.7	48.3	47.1	45.1	39.8	15.9	21.4	17.9	17.4	17.6
TG(18:1_20:3_22:5)	54.4	59	58.4	55.6	43.4	14.8	17.4	16.3	17.8	17.3
TG(18:1_20:3_22:6)	87.9	99.1	102	92.7	80.1	25.5	30	29.5	26.6	29.5
TG(18:1_20:5_22:5)	72.4	79.2	80.6	73	57.4	16.2	19.9	20.2	17.9	18.9
TG(18:1_22:1_22:1)	4.46	4.5	4.87	3.94	3.77	4.5	5.34	5.51	5.1	5.25
TG(18:1_22:1_22:5)	2.86	2.33	2.41	2.37	2.33	0.438744	0.512	0.711816	0.914863	0.481186
TG(18:1_22:3_22:5)	6.49	6.48	7.62	7.63	5.78	2.11	2.44	2.37	2.06	2.13
TG(18:1_22:4_22:5)	16.1	16.1	17.1	16.7	13.3	3.88	5.69	4.97	4.76	4.97
TG(18:1_22:5_22:5)	50.8	55.3	55.7	51.2	44	11	13	13.1	11.8	12.4
TG(18:1_22:5_22:6)	24.3	26.6	27.6	24	19.9	3.47	4.35	4.71	3.8	4.19
TG(18:2_19:1_22:1)	4.25	5.01	4.79	4.05	3.39	3.45	3.72	3.78	3.35	3.69
TG(18:2_20:2_22:5)	31.8	32.5	27.3	29.6	31.5	9.91	14.4	12.5	14.8	11
TG(18:2_20:3_22:5)	47.8	45.2	45.5	40.4	34.7	9.37	12.6	13.7	11.4	10.8
TG(18:2_20:5_22:5)	7.14	7.3	7.89	6.71	5.47	1.41225	1.77	2.25	1.66453	1.89
TG(18:2_22:5_22:6)	8.94	9.48	10.3	8.69	7.1	2.01	2.56	2.7	2.36	2.57
TG(20:1_20:1_20:4)	10.1	11.3	11	9.93	7.41	6.49	7.54	8.19	3.47	7.35
TG(20:1_20:1_22:5)	2.2	2.16	2.12	2.10261	1.99	0.846739	1.11	0.929937	0.991753	0.874321
TG(20:1_20:2_22:5)	5.28	4.53	4.98	4.92	4.39	1.54972	1.87	1.51756	1.48241	1.64823
TG(20:1_20:3_22:1)	5.77	6.1	6.25	4.93	4.9	3.07	3.78	3.96	3.81	3.65
TG(20:1_20:4_22:1)	2.01327	1.8705	2.22	2.17616	1.93	1.21126	1.46	1.4504	1.24716	1.2054
TG(20:1_22:0_22:2)	0.129657	0	0	0	0	20.3	0	0	0	0
TG(20:1_22:1_22:2)	0	0	0	0	0	0	0	0	0	0
TG(20:1_22:1_22:5)	2.49	2.9	2.47	2.44	2.27	0.344001	0.452	0.656548	0.457056	0.52197
TG(20:1_22:2_22:5)	0.487577	0.720764	0.484554	0.446379	0.352621	0.104248	0.0868	0.1118	0	0.0806398
TG(20:1_22:3_22:5)	0.346816	0.241234	0.352512	0.194604	0.263196	0	0	0.108024	0	0
TG(20:2_22:2_22:4)	0.389057	0.44539	0.539313	0.541735	0.339134	0	0	0.0891429	0	0.0257345
TG(20:2_22:3_22:5)	1.12316	1.02164	1.1994	0.779502	0.780592	0.109456	0.226	0.221486	0	0.218032
TG(20:2_22:5_22:5)	3.8	4.2	3.57	3.61	3.17	0.52686	0.87	0.697636	0.483	0.784725
TG(20:3_20:5_22:6)	3.86	4.19	4.2	3.66	2.93	0.924742	1.12	1.51836	1.11551	1.21005
TG(20:3_22:3_22:5)	2.36	2.37	2.63	2.47	2	0.252151	0	0	0.245345	0.247381

## Sheet: K562_Lipidomics
Supplementary Table S4B: Normalized lipid counts of K562 cells.
Sample	K562 NTC a	K562 NTC b	K562 NTC c	K562 NTC d	K562 NTC e	K562 ACSL4 a	K562 ACSL4 b	K562 ACSL4 c	K562 ACSL4 d	K562 ACSL4 e
CE(16:1)	459.665	418.628	577.837	461.321	354.886	517.153	466.094	417.07	355.787	443.351
CE(18:1)	639.401	647.049	694.005	574.094	514.442	619.498	689.572	646.04	533.158	669.215
CE(18:2)	999.299	840.71	1183.29	1053.06	782.862	839.022	902.817	962.473	599.124	1161.73
CE(18:3)	141.91	128.088	174.606	137.52	107.008	145.302	125.828	120.463	98.3775	134.408
CE(20:4)	291.712	230.141	329.098	287.559	230.897	203.31	223.272	226.318	183.805	240.834
CE(20:5)	183.344	152.306	230.601	177.192	128.837	184.358	170.513	165.928	135.458	176.075
CE(22:5)	89.2225	76.31	119.826	101.916	77.4055	101.715	81.5259	63.2226	79.2063	108.148
CE(22:6)	316.28	238.492	358.847	248.126	259.249	315.02	281.947	250.282	205.791	337.581
Cer(d16:2_24:0)	3.2	2.78	3.19	2.82	2.09	3.26	3.31	2.79	2.69	2.88
Cer(d18:0_16:0)	2.79	2.24	2.31	2.15	1.5081	3.23	3.32	2.19	1.99946	2.19
Cer(d18:0_17:0)	0.16421	0.073425	0	0.0965459	0.0848335	0.242111	0.25092	0.14297	0.0632641	0.173618
Cer(d18:0_18:0)	2.42	2.2	2.26	2.34	1.57596	2.93	2.8	2.21	1.96486	2.17
Cer(d18:0_20:0)	1.14378	0.85535	1.18752	0.933818	0.657232	1.25048	1.26437	1.02595	0.883366	0.916074
Cer(d18:0_22:0)	1.59991	1.039	1.45892	1.06047	0.737316	1.64811	1.7454	1.31005	0.844907	1.13495
Cer(d18:0_23:0)	0.261921	0.202854	0.23983	0.213172	0.162558	0.281659	0.241534	0.229524	0.181397	0.22473
Cer(d18:0_24:0)	1.58655	1.27771	1.58035	1.2705	0.992124	1.91952	1.91129	1.40816	0.934163	1.25469
Cer(d18:1_16:0)	25.9	24.4	26.9	24.3	22	28.4	26.1	25.4	25.7	25.4
Cer(d18:1_17:0)	1.07136	0.840097	0.935222	0.816366	0.953242	0.922432	0.973877	0.822574	0.772478	0.9622
Cer(d18:1_18:0)	3.25	3.3	3.45	3.84	3.15	3.87	3.67	3.53	3.72	3.68
Cer(d18:1_19:0)	0.309507	0.192179	0.264888	0.297279	0.110013	0.297017	0.280279	0.203936	0.218921	0.188835
Cer(d18:1_20:0)	2.42	2.15	2.43	2.61	1.87343	2.73	2.38	2.28	2.43	2.41
Cer(d18:1_22:0)	13.6	12.2	13.7	12.7	10	14.2	13.7	13.1	13.2	12.5
Cer(d18:1_23:0)	2.47	2.3	2.74	2.37	1.91172	2.71	2.36	2.36	2.27	2.5
Cer(d18:1_24:0)	19.3	16.7	20.9	18	14.3	23	20.7	19.5	19.6	19.6
Cer(d18:1_24:1)	80.4	72.2	84.3	74.2	60.8	90.3	84.1	78.9	81.3	79.2
Cer(d18:1_26:0)	0.659463	0.578639	0.69363	0.708115	0.558782	0.767263	0.791956	0.741215	0.623782	0.729137
Cer(d18:1_26:1)	2.1317	1.79548	2.16	1.97041	1.49508	2.5	2.31	2.10939	2.00585	2.04478
Cer(d18:2_16:0)	4.18	3.54	4.1	3.32	2.93	3.91	3.43	3.36	3.71	4.06
Cer(d18:2_18:0)	0.341957	0	0	0	0	0	0.474222	0	0	0
Cer(d18:2_20:0)	0.133607	0.140899	0.265102	0	0.170073	0.35608	0.184869	0.308279	0.333407	0.27798
Cer(d18:2_22:0)	2.96	2.62	3.26	2.77	2.18	3.14	2.95	2.63	2.86	2.9
Cer(d18:2_23:0)	0.900022	0.719134	0.913567	0.744917	0.660648	0.842888	0.788216	0.732252	0.763084	0.836257
Cer(d18:2_24:0)	7.65	6.69	8.47	6.97	5.42	8.3	7.59	7.29	7.25	7.58
Cer(d18:2_26:0)	0.193042	0.122832	0.295196	0.244913	0.122258	0.257779	0.226514	0.214369	0.203231	0.188933
DG(14:0_16:0)	6.46461	4.81979	6.13287	4.09607	4.173	4.66693	7.3458	5.91031	4.94762	4.32395
DG(14:0_18:1)	24.5962	25.4664	25.8605	29.2411	27.8963	36.7	34.2071	33.8722	27.4487	29.7688
DG(16:0_16:0)	59.5	67.2	72	73.2	56.8	87.3	87	82.7	73.2	68.8
DG(16:0_17:0)	11.1003	12.1516	13.3558	14.1994	10.9837	16.9558	17.5624	14.5428	15.1946	13.5172
DG(16:0_17:1)	10.3	9.0666	11.3083	11.123	10.5702	12.6381	16.3487	11.7546	11.7071	11.1541
DG(16:0_18:0)	160	140	180	164	137	218	213	200	158	173
DG(16:0_18:1)	412	399	442	419	352	496	472	465	418	417
DG(16:0_18:2)	121	119	115	132	125	140	142	135	126	125
DG(16:0_20:1)	500	445	531	505	389	601	633	568	481	496
DG(16:0_20:3)	77.1	65.7	81.1	74.9	58.8	83.9	79.5	85.6	83.9	69.9
DG(16:0_20:4)	0	2.40633	3.64764	4.66797	4.85446	1.2573	1.58926	0	0	3.13865
DG(16:0_22:1)	119	109	131	117	92.2	152	151	139	125	124
DG(16:0_22:6)	6.3645	7.2182	8.03663	8.53323	6.92418	7.17301	7.59945	8.12575	6.5952	6.95853
DG(17:0_18:1)	16.0128	17.0047	21.2824	20.2769	14.9263	22.0448	25.5608	20.8046	20.7136	17.7361
DG(17:0_22:5)	3.19705	0	4.12765	2.55601	1.91933	1.12894	3.92636	2.20035	2.21029	2.85183
DG(17:1_18:0)	29.1253	25.5608	31.6	29.3786	24.028	40.4	35.9	35.115	31.1741	29.1079
DG(18:0_18:0)	26.0313	23.0528	28.9265	31.8262	20.5105	34.2482	33.9592	32.7255	29.2822	29.3345
DG(18:0_18:2)	143	142	166	148	116	174	185	170	148	146
DG(18:0_18:3)	22.3702	22.7436	26.3954	23.6014	21.444	25.6349	27.3355	23.7625	21.6218	22.4435
DG(18:0_20:3)	100	93.3	113	104	75.3	120	119	111	98.2	102
DG(18:0_20:4)	173	159	204	196	141	193	220	186	183	185
DG(18:0_22:4)	33.3	30.4859	38.5	33.4835	24.4326	38.1	39.8	35.3271	28.6962	32.8
DG(18:1_18:1)	292	296	322	309	261	353	371	339	321	296
DG(18:1_18:2)	32.8	31.6321	36.1	36.3	37.4	39.5	39.9	32.6883	34.3	35.5
DG(18:1_18:3)	16.7026	16.5448	14.1593	16.2136	16.9095	14.1499	18.8043	14.7906	16.1097	15.9791
DG(18:1_19:0)	14.2939	13.4139	13.9177	13.4335	9.83293	17.5733	18.9054	16.9414	14.0409	15.1528
DG(18:1_20:1)	397	368	435	402	319	486	505	467	406	410
DG(18:1_20:4)	29.7781	33	38.4	33.1599	30.9628	30.794	28.35	35.0377	26.1003	27.2097
DG(18:1_22:4)	9.55415	6.09667	10.121	11.0678	6.70451	10.1815	9.5154	8.85136	10.5776	7.4505
DG(18:1_22:5)	23.0601	15.8611	26.1756	22.896	20.4606	24.9942	22.3238	24.4245	23.8963	20.1308
DG(18:2_18:2)	7.46792	9.05527	8.62076	11.733	10.1926	12.313	11.3914	7.61421	8.80449	7.85764
DG(19:1_18:1)	22.5339	22.349	23.0066	26.4888	18.838	32.64	31.7385	28.2764	22.7978	27.1003
DG(20:1_20:2)	58.7	53.8	61.9	56.1	45.8	72.9	73.4	67	59.3	59.3
GM3(d18:1_16:0)	0.806722	0.720521	0.818334	0.789725	0.612145	0.652119	0.718694	0.722271	0.748302	0.75666
Hex2Cer(d18:1_16:0)	1.09155	1.0134	1.0205	0.993544	0.699731	1.08635	0.805214	0.971004	0.932177	1.09164
Hex2Cer(d18:1_18:0)	0	0	0	0	0.0703204	0	0	0	0	0
Hex2Cer(d18:1_20:0)	0	0	0	0	0	0	0	0	0	0
Hex2Cer(d18:1_22:0)	0.500674	0.387591	0.535444	0.40738	0.36289	0.434796	0.409225	0.390018	0.346388	0.401451
Hex2Cer(d18:1_24:0)	0.632783	0.530241	0.658022	0.58781	0.475987	0.750319	0.56211	0.587155	0.551402	0.614341
Hex2Cer(d18:1_24:1)	2.54	2.32	2.99	2.37	2.07	2.7	2.55	2.49	2.39	2.71
Hex2Cer(d18:1_26:1)	0	0	0	0	0	0	0	0	0	0
LPC(14:0)	1.30538	1.07026	1.28326	1.22064	1.03741	1.06997	1.17829	1.10754	1.06819	1.12754
LPC(15:0)	0.813551	0.741024	0.713573	0.682264	0.639537	0.72227	0.747593	0.699346	0.76736	0.690248
LPC(16:0)	64.7	57	63.5	62.6	51.5	62.6	59.6	59.9	59.4	59.7
LPC(16:1)	2.43248	1.89595	2.37411	2.29695	1.61831	2.21364	1.97959	1.77832	1.94534	1.98107
LPC(17:0)	3.78116	3.25101	3.62	3.64	2.83575	3.57063	3.3216	3.23482	3.5982	3.53777
LPC(18:0)	102	90.8	101	95.5	76.5	103	99.5	96.5	94.3	95.7
LPC(18:1)	60.2	52.7	60	58.5	50.9	59.6	56	56	56.7	56.3
LPC(18:2)	2.71628	2.21319	2.91263	2.64654	2.12183	2.59983	2.5459	2.18185	2.36939	2.54959
LPC(18:3)	0	0	0	0	0	0	0	0	0	0
LPC(19:0)	0.686832	0.640233	0.69681	0.60422	0.398858	0.723016	0.688013	0.570874	0.632321	0.59403
LPC(19:1)	0.714292	0.577093	0.891081	0.644687	0.307758	0.666196	0.575767	0.681259	0.422562	0.69631
LPC(20:0)	10.3287	9.50942	11.0096	10.7863	0.344446	7.85788	8.78638	11.0713	10.1258	9.62876
LPC(20:1)	9.68	8.46	10	9.39	7.3	10.3	9.86	9.48	8.76	9.23
LPC(20:2)	0.79949	0.700602	0.879553	0.834443	0.547675	0.895548	0.857716	0.890142	0.826321	0.839405
LPC(20:3)	0.178911	0.112434	0.281871	0.221081	0.170747	0.172998	0.152143	0.105478	0.186823	0
LPC(20:4)	0	0	0	0	0	0	0	0	0	0
LPC(20:5)	0	0	0	0	0	0	0	0	0	0
LPC(22:5)	0	0	0	0	0	0	0	0	0	0
LPC(22:6)	0	0	0	0	0	0	0	0	0	0
LPC(O-16:0)	9.18691	8.53836	9.9024	8.72188	1.57262	7.14114	7.26662	9.96141	9.25876	8.48515
LPC(O-18:0)	8.18963	8.21524	8.97208	9.12974	2.00406	8.38468	7.93252	11.1163	9.92604	9.06609
LPC(O-18:1)	3.07642	3.1403	3.25343	3.11228	1.99795	2.41882	2.33893	3.50793	3.05609	2.93548
LPE(16:0)	5.47126	4.77895	5.33221	5.20665	4.05588	5.27276	5.3055	4.53589	4.89268	5.4444
LPE(17:0)	5.44621	5.09219	5.54907	5.37929	0.822701	3.16788	3.75697	4.4699	4.18541	3.93762
LPE(18:0)	53.7	49.1	53.4	51.6	45.1	57.3	54.3	52.9	54	55.3
LPE(18:1)	9.5924	7.50522	8.55033	7.28872	7.23676	9.00531	9.40799	9.22624	8.36978	9.24527
LPE(18:2)	0	0	0	0	0	0	0	0	0	0
LPE(20:1)	0	0	0	0	2.34947	0	0	0	0	0
LPE(20:4)	0	0	0	0	0	0	0	0	0	0
LPE(20:5)	0	0	0	0	0	0	0	0	0	0
LPE(22:5)	0	0	0	0	0	0	0	0	0	0
LPE(P-20:0)	7.48084	6.79762	7.46141	8.24308	1.88036	6.55439	6.52915	7.99696	7.40139	7.23656
PC(10:0_16:0)	0.0858093	0	0.112978	0.0559092	0	0.0877962	0.132447	0.0535831	0	0.082826
PC(10:0_18:1)	0.631382	0.372768	0.612588	0.486079	0.260129	0.699133	0.620513	0.417134	0.382562	0.468545
PC(10:0_19:0)	39.6	32.4	39.8	33.2	25.9	39.7	39.1	36.8	33.3	36.3
PC(10:0_21:0)	320	281	313	280	233	329	308	301	288	301
PC(10:0_22:0)	935	809	915	788	675	984	925	884	818	852
PC(10:0_23:0)	251	211	241	219	182	253	235	233	227	230
PC(10:0_24:0)	513	440	499	465	376	534	486	486	462	489
PC(10:0_25:0)	75.6	62.4	75.4	65.8	52.4	79	74.4	70.7	69.7	72.8
PC(11:0_16:0)	0	0	0	0	0	0	0	0	0	0
PC(11:0_25:0)	39.4	31.1	40.5	32.7	23.9	41.8	41.5	37.8	33.8	36.5
PC(12:0_17:1)	1.41867	0.921896	1.27455	0.896232	0.586746	1.28727	1.35715	1.06647	0.983538	1.06911
PC(12:0_18:1)	120	101	122	103	79.8	123	118	110	99.3	110
PC(12:0_18:2)	6.26	5.12	6.28	5.28	4.03	6.09	5.88	5.41	4.93	5.37
PC(12:0_18:3)	2.14	1.61061	2.05	1.67071	1.11608	1.86863	1.79271	1.58193	1.12478	1.79584
PC(12:0_19:1)	98.9	84.9	98.1	85.4	71	98.1	93.9	89.2	86.7	91.3
PC(12:0_20:1)	2850	2470	2820	2520	2080	2880	2770	2630	2550	2680
PC(12:0_20:3)	24.8	20.6	25.3	21.5	17	24.5	23.6	22	20.9	23
PC(12:0_22:1)	7520	6590	7250	6760	5930	7540	7190	7090	7010	7000
PC(12:0_22:2)	3070	2770	3110	2780	2350	3240	2970	2970	2890	3010
PC(12:0_22:4)	43.8	37	45.2	39	30.8	44.1	42.2	39.6	38	41.4
PC(12:0_26:0)	4.06	3.27	4.11	3.26	2.32	4.55	4.45	3.97	3.39	3.82
PC(13:0_18:2)	4.33	3.68	4.5	3.83	2.92	4.3	4.36	4.01	3.62	4.09
PC(13:0_20:1)	749	660	759	667	558	778	734	714	705	716
PC(13:0_20:2)	109	98	110	96.4	80.1	110	104	100	102	104
PC(13:0_20:3)	8.83	6.79	8.76	7.69	6.22	8.99	8.64	8.03	7.67	8.55
PC(13:0_20:4)	0.302027	0.180737	0.336483	0.267188	0.122424	0.313672	0.280358	0.285592	0.209693	0.220213
PC(13:0_22:1)	1360	1170	1330	1230	1010	1400	1320	1310	1270	1310
PC(13:0_22:2)	570	504	572	517	430	591	552	547	550	553
PC(13:0_22:4)	18.8	15.7	18.2	16.4	13.2	18.2	17.4	16.8	16.2	17.7
PC(14:0_14:0)	79.2	62.9	78.2	64.8	49.3	79.3	82	72.3	61.7	70.1
PC(14:0_16:0)	1170	983	1130	968	792	1150	1140	1060	963	1040
PC(14:0_20:3)	585	527	602	540	439	612	569	548	542	577
PC(14:0_20:5)	6	4.95	5.95	5.42	4.08	5.44	5.31	4.85	4.6	5.19
PC(14:0_22:4)	679	602	694	625	501	703	675	653	647	668
PC(14:0_22:6)	15.8	13.5	16.3	14.1	11.2	14.6	14.1	13.2	12.8	14
PC(14:0_24:1)	286	235	293	246	181	316	315	284	259	276
PC(14:0_26:0)	4.7	3.49	4.56	3.8	2.51	5.21	5.27	4.55	3.35	4.21
PC(14:1_22:2)	2270	2040	2330	2080	1740	2420	2270	2230	2220	2260
PC(14:1_22:6)	0.157019	0	0.14015	0.0552947	0	0	0.0543977	0	0	0
PC(15:0_20:5)	3.67	3.03	3.89	3.25	2.61	3.47	3.37	2.99	2.89	3.24
PC(15:0_22:1)	191	159	193	167	127	204	197	186	177	187
PC(15:0_22:2)	335	293	339	314	255	354	340	337	312	335
PC(15:0_22:4)	38.9	34.3	38.9	36.7	29.9	39.7	37.9	37	38.5	38.1
PC(15:0_22:6)	5.08	4.66	5.63	4.63	3.58	4.66	4.48	4.35	4.21	4.51
PC(15:1_22:2)	69	61.3	67.3	62.2	54.4	71	66.7	66.6	68.2	66.9
PC(15:1_22:4)	40.4	35.5	40.5	36.9	30.6	39.3	37.3	36.5	36.5	37.8
PC(16:0_20:4)	267	249	273	249	218	285	250	256	260	271
PC(16:0_20:5)	241	217	252	223	181	241	228	218	216	233
PC(16:0_22:5)	755	682	775	705	579	783	719	717	701	736
PC(16:0_23:5)	32.3	29.3	34	30.7	25.4	34.4	32.7	31	32	31
PC(16:0_24:1)	34.7	26.6	34	28.1	20.1	37.5	37.6	34.1	27.6	31.9
PC(16:0_26:0)	1.53183	1.14984	1.66004	1.3409	0.815233	1.70986	1.88	1.48273	1.20152	1.39114
PC(16:0_26:2)	58.8	45.7	59.2	48.8	34.7	66.2	65.8	59.4	46.4	56.3
PC(16:1_22:2)	732	634	723	667	544	772	731	715	669	723
PC(16:1_22:6)	22.4	19.6	23.5	20.6	15.9	21.1	20.2	19.4	18.3	20.5
PC(16:1_24:1)	165	133	168	139	103	185	184	165	142	159
PC(17:0_20:0)	2.49	2	2.72	2.13	1.46869	3.02	2.69	2.46	2.19	2.44
PC(17:0_22:1)	5.79	4.57	5.67	4.55	3.49	5.89	5.99	0	4.49	0
PC(17:0_22:2)	39.9	33.4	40.7	34.8	26.1	43.4	42.5	39.4	36.1	39.1
PC(17:0_22:4)	13.9	11.4	13	12.5	10.4	15	13	12.6	13.2	13.1
PC(17:0_22:6)	20.4	19.5	22	19.6	16.5	20.8	18.9	19.2	18.8	19.7
PC(17:1_22:2)	4.94	3.68	4.21	4.59	3.71	4.88	4.89	3.65	4.16	4.58
PC(17:1_22:6)	2.28	1.74641	2.3	2.14	1.57741	1.90244	1.7192	1.91599	1.72642	1.85396
PC(18:0_18:1)	4900	4130	4520	4380	3610	4940	4650	4650	4430	4690
PC(18:0_20:4)	586	515	583	534	438	606	568	561	551	562
PC(18:0_22:3)	117	94.9	118	101	76.5	129	125	115	102	111
PC(18:0_22:4)	83.6	73.7	85.1	78.3	61.2	89.2	84.5	81.7	75.2	83.2
PC(18:0_22:5)	280	243	274	255	212	287	265	268	254	266
PC(18:0_24:1)	19.8	15.1	19.1	16.2	11.3	21.7	22.1	19.5	15.3	18.4
PC(18:1_18:1)	6890	5980	6620	6220	5270	7120	6770	6760	6430	6510
PC(18:1_20:1)	1490	1240	1410	1320	1070	1550	1480	1450	1330	1450
PC(18:1_20:5)	352	313	357	326	265	339	315	307	308	321
PC(18:1_22:5)	286	262	297	269	221	300	280	270	270	280
PC(18:1_22:6)	129	115	134	122	97.9	124	116	112	110	120
PC(18:2_22:6)	15.9	14.1	16.9	14.7	11.6	15.7	14.3	14.1	13.6	14.7
PC(18:3_20:5)	6.85385	4.79146	5.75802	4.72994	0	14.2004	12.9966	21.4621	16.2357	15.2686
PC(18:3_22:6)	2.35	2.14	2.48	2.16	1.49642	2.28	2.08	1.89214	1.86124	2.1
PC(18:3_24:1)	17.7	14	17.6	15	10.6	18.8	18.5	17.4	15.2	16.8
PC(18:4_22:6)	0	0	0	0	0	0	0	0	0	0
PC(19:0_22:2)	5.09	4.25	5.41	4.49	3.03	5.87	5.95	5.26	4.13	4.86
PC(19:0_22:6)	4.86	4.55	5.17	5.95	4.78	5.58	5.46	4.81	5.3	5.45
PC(19:1_22:4)	7.64	6.53	7.61	7.96	5.34	8.56	8.35	7.91	7.19	8.55
PC(19:1_22:6)	2.34	1.80742	2.13	1.79961	1.22543	2.02	1.99	1.48128	1.74626	1.73526
PC(20:0_22:5)	0.514801	0.563424	0.59115	0.87312	0.585622	0.740967	0.721627	0.837796	0.587089	0.593159
PC(20:0_22:6)	90.7	75.6	87.1	80.5	64.6	96.1	90.4	89.8	82	87.6
PC(20:0_24:1)	4.76	3.88	4.77	4.13	2.78	5.42	5.65	4.95	3.87	4.63
PC(20:1_22:2)	37.4	29.6	37.2	31.2	22.3	42.5	41.8	37.3	29.5	35.1
PC(20:1_22:6)	24.1	21.3	24.3	22.2	17.5	26.3	23.7	23.9	21.2	22.9
PC(20:2_22:6)	8.72	7.7	8.88	8.11	6.6	8.52	8.75	8.51	7.7	8.24
PC(20:3_22:6)	4.98	4.66	5.24	4.9	3.98	5.38	4.69	4.54	4.84	5.08
PC(20:4_22:6)	3.2	2.73	3.33	2.84	2.23	3.23	2.89	2.82	2.65	3.08
PC(20:5_22:6)	0.518872	0.449744	0.524834	0.466831	0.326468	0.503195	0.467797	0.405258	0.378054	0.505894
PC(21:0_22:1)	0.659083	0.379748	0.724969	0.475869	0.0744185	0.695282	0.818337	0.698986	0.434747	0.512803
PC(21:0_22:2)	1.72201	1.19034	1.65038	1.32121	0.853202	1.99	1.87	1.57812	1.22492	1.47284
PC(21:0_22:6)	0.894024	0.798462	1.16157	0.913059	0.739483	1.12411	0.977871	0.994973	1.06358	0.855144
PC(22:0_22:2)	17.3	13.7	17.5	14.7	10.5	20.2	20	18	13.8	16.8
PC(22:0_22:4)	6.21	4.93	6.36	5.34	3.77	7.02	6.75	6.11	4.67	5.75
PC(22:0_22:6)	15.1	12.1	15.3	13	9.88	16.6	15.9	15.1	12.8	14.6
PC(22:1_22:2)	13.9	10.8	14	11.4	8.06	15.7	15.6	13.9	10.7	13.1
PC(22:1_22:4)	7.63	6.17	7.62	6.68	4.46	8.28	8.19	7.49	6.22	7.1
PC(22:1_22:6)	3.51	2.71	3.09	3.25	2.19	3.59	3.14	2.94	3.2	3.43
PC(22:2_22:6)	1.14095	1.08136	1.08402	0.980349	0.636602	1.05762	1.15711	1.14001	1.10012	0.906446
PC(22:4_22:6)	3.1	2.43	2.82	2.45	2.18	2.72	2.66	2.44	2.39	2.66
PC(23:1_23:1)	1.49983	1.09295	1.63361	1.20789	0.730269	1.73229	1.86	1.57415	1.11133	1.50661
PC(O-14:0_15:0)	5.19	4.15	5.2	3.69	3.25	5.62	5.04	5.49	5.19	4.34
PC(O-14:0_16:0)	64.9	53.5	62.1	51.8	42.4	65.1	63.9	59.1	50.7	55.2
PC(O-14:0_18:0)	140	112	131	116	91.7	137	131	123	107	121
PC(O-14:0_18:1)	178	146	163	145	119	174	165	159	143	152
PC(O-14:0_18:2)	199	173	199	177	144	211	197	193	181	183
PC(O-14:0_18:3)	35.6	32	37.2	32.5	27.1	38.3	34.8	33.2	34.9	33.7
PC(O-14:0_20:4)	30.1	27	30.9	28.7	23.6	31.9	28.4	29.3	28.9	30.5
PC(O-14:0_22:0)	11.2	8.94	11.2	9.25	7.11	11.6	11.7	10.9	9.09	10.3
PC(O-15:0_20:4)	11.3	10.3	11.3	10.1	7.64	14	10.8	11.3	11.9	11.1
PC(O-16:0_12:0)	7.51	5.55	6.67	5.54	4.19	7.28	7.6	6.65	5.15	6.16
PC(O-16:0_14:1)	51.4	51	51.7	63.6299	24.92	41.0404	46.7601	44.0524	47.392	45.5071
PC(O-16:0_15:0)	7.96	5.82	6.3	6.22	5.2	6.89	6.71	6.95	6.21	5.67
PC(O-16:0_15:1)	164	143	162	144	120	172	164	161	153	149
PC(O-16:0_17:0)	23.5	19.2	22	20.3	17.1	22.4	22.5	20.9	19.6	21.6
PC(O-16:0_17:1)	37.5	33.3	37.4	34.1	27.5	39.8	37.7	35.9	33.7	34.7
PC(O-16:0_18:0)	109	88.2	108	91.9	70.2	111	106	100	91.6	102
PC(O-16:0_18:1)	534	477	536	558	769	372	365	459	413	388
PC(O-16:0_18:2)	147	138	147	164	107	98.7	99.9	112	110	100
PC(O-16:0_18:3)	184	163	183	163	143	193	179	177	180	172
PC(O-16:0_19:0)	6.78	5.63	7.04	5.94	4.15	7.26	7.04	6.39	5.73	6.52
PC(O-16:0_20:3)	52	43.2408	52.3	55.9577	49.7	42.56	43.7699	51.6	51.0079	46.6315
PC(O-16:0_20:4)	81.2	71.3	77.7	73	62.1	81.2	75.6	72.4	75.6	73.2
PC(O-16:0_20:5)	37.3	32.9	37	39	31.9	40.8	36.1	36.9	39.9	36.9
PC(O-16:0_22:0)	3.03	2.38	2.97	2.36	1.77204	3.22	3.14	2.75	2.17	2.67
PC(O-16:0_22:1)	56.9	48.2	59	48.9	36.7	59.3	58.2	55	48.6	54.9
PC(O-16:0_22:4)	32.1	27.8	32.6	31.3	24.6	29.6	30.7	31.1	30.3	35.9
PC(O-16:0_22:5)	67.6	62.1	68.3	65.3	54.8	69.2	64.6	64.8	63.3	65.9
PC(O-16:0_22:6)	64.5	56.7	61.1	57.5	48.7	64	57.7	59.2	60.4	59
PC(O-17:0_20:4)	7.44	6.47	6.92	6.83	5.32	7.33	6.72	6.49	6.46	7.65
PC(O-18:0_17:2)	113	99	112	106	87.3	122	113	112	107	108
PC(O-18:0_18:1)	386	338	382	400	409	247	243	322	284	270
PC(O-18:0_22:1)	16.7	13	16.5	13.7	10.1	17	17.4	15.6	12.6	15.2
PC(O-18:0_22:2)	42.2	34.5	42.2	35.7	26.7	43.9	43.6	39.7	33.9	39.9
PC(O-18:0_22:4)	14.2	11.4	14.4	12	9.16	12.9	13.6	12.9	11	12.9
PC(O-18:0_22:5)	4.85	4.07	4.24	5.28	3.28	4.5	4.89	4.19	4.41	4.61
PC(O-18:0_22:6)	24.5	22.3	23.7	24	18.7	25.3	23.1	23.4	22.9	24.3
PC(O-18:1_18:1)	203	178	205	210	186	128	125	168	151	139
PC(O-18:2_24:0)	32.5	26	32.2	27.1	20.3	33.9	33.1	30.3	24.4	29.8
PC(O-20:0_20:3)	24.8	20.6	25.1	21.6	15.7	25.6	25.1	23.1	20.2	22.8
PC(O-20:0_22:4)	7.52	6.41	7.79	6.75	4.75	8.1	7.57	7.22	6.27	7.21
PC(O-20:0_22:6)	21.5	19.3	22	21.6	16.7	22.5	21.9	21.8	21.6	21.8
PC(O-22:1_22:3)	1.22486	0.933561	1.29738	0.971908	0.639395	1.42247	1.40581	1.05	0.888449	1.21919
PC(O-24:0_18:3)	16.3	13.2	16.5	14.1	10.3	16.6	16.4	15	12.8	15.1
PC(P-16:0_12:0)	7.81	6.28	7.62	6.27	4.79	7.65	7.72	7.04	6.41	7.02
PC(P-16:0_13:0)	37.8	31.8	38.4	33.1	26.2	39.6	38.1	36.5	33.9	34.5
PC(P-16:0_14:0)	99.5	90.1	99.6	87.2	74.3	106	101	96.9	91.3	92.7
PC(P-16:0_14:1)	16	13.4	15.6	13.2	11	16	15.6	14.5	13.7	14.4
PC(P-16:0_15:1)	46.8	41.4	47.1	41.4	34.5	48.2	46.2	44	45.1	43.4
PC(P-16:0_16:0)	166	138	161	139	112	165	155	150	138	146
PC(P-16:0_17:0)	43.6	38.3	41	40	32.1	44.9	41.8	41.7	39.4	38.3
PC(P-16:0_17:1)	193	172	190	170	147	214	199	196	189	183
PC(P-16:0_17:2)	61.2	55.8	63.1	58.1	47.5	66.9	60.4	61.3	63.5	60.2
PC(P-16:0_18:1)	667	561	635	586	480	678	638	636	593	623
PC(P-16:0_18:2)	38.8	34.8	38.5	35.8	27.6	39.9	36.1	35.6	33.8	35.4
PC(P-16:0_18:3)	11.2	9.4	11.5	9.32	7.86	11.8	10.4	9.72	10.9	9.59
PC(P-16:0_18:4)	5.28	4.26	5.39	4.78	3.54	5.76	5.26	4.89	5.05	5.21
PC(P-16:0_19:1)	42.8	36.7	41.9	37.5	31.3	42.5	39.3	39.6	37.2	39.7
PC(P-16:0_20:3)	17.8	15.5	20.1	12.1	13.8	13.5	17	11.1	15.4	16.9
PC(P-16:0_20:4)	31.6	40.8	34.2	29.2	24.3	33.9	30.4	36	29.2	30.7
PC(P-16:0_20:5)	33.7	29.6	34.7	30.7	25.4	35.1	32.7	30.7	33.3	32.7
PC(P-16:0_22:4)	46.1	38.8	40.8	39.3	35	46.5	40.2	42.5	39.5	41.1
PC(P-16:0_22:6)	7.83426	6.948	8.09802	8.30684	5.08305	23.3484	27.375	31.2431	27.6426	26.2698
PC(P-18:0_17:2)	32.4	28.2	30.7	28.5	24.5	33.2	30.8	30.2	31.5	29.3
PC(P-18:0_18:1)	298	252	296	262	199	308	291	277	266	276
PC(P-18:0_20:5)	103	93.2	105	109	54.8	188	200	242	224	217
PC(P-18:0_22:4)	31.8	28.4	32.1	29.9	24.9	32.3	29.9	30.6	29.5	31.7
PC(P-18:0_22:6)	18.1	17	17.5	16.8	13.9	17.8	17.7	15.8	17	16.7
PC(P-18:1_18:1)	172	155	172	183	178	108	111	133	121	115
PC(P-20:0_20:5)	27.4	24.4	25.9	24.3	20.5	26.5	23.7	25.2	23.9	25.1
PC(P-20:0_22:4)	11	9.11	11.2	9.77	7.35	11.7	11.3	10.6	9.96	11.2
PE(14:0_16:0)	8.40625	7.34123	9.66424	8.00421	5.75163	8.1239	8.08055	7.90566	7.90187	8.43186
PE(14:0_16:1)	8.95183	7.07345	9.28271	8.15246	0	4.03221	3.59731	7.42108	5.41522	5.38595
PE(14:0_18:1)	51.4	38.5	56	41.8	32.2	58.2	51.1	53	42.9	48.2
PE(14:0_20:4)	6.15425	4.64966	7.35123	4.90114	0	4.59735	4.58139	6.57578	5.28718	4.92537
PE(15:0_16:0)	3.16463	3.21513	3.53294	3.67243	1.33125	2.35607	2.08817	3.06629	2.88448	2.41007
PE(15:0_18:0)	6.63901	6.20696	8.11475	7.9125	5.35854	5.3644	5.65515	6.70683	5.91694	5.89694
PE(15:0_18:1)	14.5395	13.7381	14.2494	13.7365	4.82495	8.61092	7.97116	10.861	9.66367	9.40403
PE(16:0_16:0)	16.7182	16.6448	19.3298	20.5729	17.6335	16.4928	16.358	22.0517	19.6407	20.2777
PE(16:0_17:0)	6.75651	6.52019	7.16311	7.25417	5.91901	6.16744	6.21385	8.40993	7.05238	7.07155
PE(16:0_18:0)	71.4	51	62.9	58.1	52.4	69	64.6	69	62.7	66.5
PE(16:0_18:1)	1010	753	926	835	746	948	908	1010	893	924
PE(16:0_18:2)	357	292	360	303	270	360	349	381	331	344
PE(16:0_18:3)	73.1	63	77.6	67.9	13.8026	41.8	41.0565	62.7	55.6	50.5
PE(16:0_20:4)	71.9	56.7	70.1	63	53.1	66.8	62.7	75.2	66.8	70.2
PE(16:0_20:5)	52	39.6	52.6	46.2	40.5	46.6	41	49	42.9	48.6
PE(16:1_16:1)	35.526	35.0445	38.3727	38.3102	5.51623	22.6693	21.8814	29.6135	26.24	25.341
PE(16:1_17:0)	135	129	144	151	29.8054	86.7	86.5	114	103	96.8
PE(16:1_17:1)	4.02234	3.10127	4.17334	4.75255	0	2.44504	1.84941	3.35914	2.74551	1.97284
PE(16:1_18:2)	86.8	82.5	97.5	96.3	28.119	50.5	56	74	65.5	64.9
PE(16:1_20:5)	4.88273	3.7469	4.3322	5.06711	0.628388	7.5716	7.10304	11.235	9.59269	9.37305
PE(17:0_18:0)	5.73689	5.59871	6.60915	5.96528	7.47721	4.44854	4.88497	6.95745	6.82592	5.90586
PE(17:0_18:1)	258	223	264	236	209	263	250	265	251	261
PE(17:0_18:3)	8.32912	6.94035	8.46799	8.20634	4.23466	5.22432	5.38568	6.83011	5.77736	6.37381
PE(17:0_20:3)	44.5	41.4465	47.1	50.5708	22.6183	33.1414	32.4727	42.6457	38.0375	39.3508
PE(17:0_20:4)	56.7	50.6	58.6	61.2	26.2875	92	96.2	127	114	111
PE(17:0_20:5)	12	12.1	14	11.9	9.92	12.4	9.91	13.4	13.1	11
PE(17:1_18:1)	90.3	86.5	101	103	68.2	52.9	50.7	66.1	60	58.5
PE(17:1_18:2)	21.4869	20.726	24.222	23.74	8.11893	12.9658	13.0634	16.8989	14.6723	13.9698
PE(18:0_18:1)	3660	2840	3510	3150	2770	3480	3390	3700	3390	3420
PE(18:0_19:1)	25.4845	24.9648	29.1445	28.3148	45.7	22.2822	20.2757	30.3764	24.8136	24.2086
PE(18:0_20:1)	48.2	44	51.3	51.8172	195	42.9	40.5078	59.2	50.6	48.1
PE(18:0_20:2)	43.8	36	45.8	27.2	30.2	45.7	45.8	47.2	40.3	43.5
PE(18:0_20:3)	192	167	360	184	282	196	190	202	203	201
PE(18:0_20:4)	614	506	602	533	499	589	539	610	563	613
PE(18:0_20:5)	448	374	454	398	370	411	380	435	434	428
PE(18:0_22:2)	12.1	9.73	11.3	10.8	8.83841	11.6	10.8	12.7	12.1	11.5
PE(18:0_22:4)	47.6	45.5	50.5	53.0308	53.9	51.3	52.2	70.8	62.5	61.3
PE(18:0_24:1)	15.1	12.2	15.4	12.8	10.9	17.6	14.7	15.8	13.8	14.7
PE(18:1_18:1)	4300	3400	4210	3670	3240	4460	4140	4620	4070	4100
PE(18:1_18:2)	370	282	385	304	259	355	364	387	352	352
PE(18:1_19:0)	12.1497	9.84944	10.7754	12.3693	58.8	6.44997	5.48736	8.91425	6.59454	6.9979
PE(18:1_19:1)	52.1	48.4	59.1	58.5	122	33.726	30.6095	43.1276	36.6447	36.6228
PE(18:1_20:1)	659	507	633	569	492	647	641	678	600	626
PE(18:1_20:5)	320	266	312	271	252	258	253	284	261	274
PE(18:1_22:0)	12.024	9.5561	12.9124	10.5559	19.1098	13.0098	12.2491	18.3377	13.7898	14.8394
PE(18:1_22:2)	4.64577	3.28655	5.8372	4.6197	49.8	3.27431	2.70052	5.27126	3.47011	4.33068
PE(18:1_22:4)	474	393	464	417	364	469	431	478	450	469
PE(18:1_22:6)	15.8087	16.0501	16.0822	17.7246	46.4	28.3234	27.24	35.2321	31.3948	31.36
PE(18:2_20:5)	35.9702	33.6302	37.5414	36.06	11.9449	60.4	60.4	84	72.6	68.6
PE(18:2_22:4)	186	150	177	156	137	175	163	182	174	176
PE(19:1_20:1)	1.17765	0	0.745229	0	15.2363	0	0.612306	0.757104	0	0
PE(20:0_22:6)	32.7	23.8	29.6	26.8	22.6	31.8	28.9	33	29.8	29.7
PE(20:3_20:5)	0.935025	0	0	0	3.89724	4.3195	2.52866	5.89983	4.92343	4.33647
PE(20:4_22:0)	1.8785	1.71413	2.18107	1.60701	1.36714	3.44584	3.90784	5.29556	4.61114	4.63221
PE(O-16:0_16:0)	0	0	0.641114	0	7.77907	0	0	0	0	0
PE(O-18:0_16:0)	9.75404	8.59444	10.3225	10.5385	25.4903	8.15713	8.80589	12.1627	10.1842	10.6262
PE(O-18:0_20:4)	66.4	61.4	68.8	73.7	45.8	81	86.1	112	104	96.5
PE(O-20:0_22:4)	0	0	0	0	3.58878	0	0	0	0	0
PE(P-16:0_14:0)	8.18245	3.98144	6.3488	5.24218	3.64763	6.23228	6.09444	6.46519	5.19699	5.52211
PE(P-16:0_16:0)	41.3	29.8	35.4	30.6	27.7	38.9	37.5	37.7	30.8	33.2
PE(P-16:0_16:1)	72.3	55.7	69.5	55.8	49	71.2	68.8	68.4	62.9	65.3
PE(P-16:0_17:1)	48.2	47.7	54.5	53.7191	33.7043	19.3155	18.8534	25.425	22.5666	21.0162
PE(P-16:0_18:1)	1130	875	1090	920	793	1150	1120	1130	995	1060
PE(P-16:0_18:2)	358	279	345	308	277	354	339	367	347	326
PE(P-16:0_18:3)	83.6	67.7	85.5	71.2	60.9	89.1	80.8	87.7	78.6	86.7
PE(P-16:0_20:3)	239	175	223	203	174	235	227	250	199	214
PE(P-16:0_20:4)	210	183	217	168	161	219	204	226	188	192
PE(P-16:0_20:5)	217	180	217	179	164	197	179	203	181	188
PE(P-16:0_22:4)	31.4	19.7	25.9	23.4	16.2	19.4	27.1	16.1	20.7	27
PE(P-16:0_22:6)	97.3	75.9	98.2	82.1	72.2	91.2	80.2	86.4	82.4	83.1
PE(P-18:0_16:0)	94.6	70.1	89.4	73.3	61.6	89.3	88.1	88.4	76.7	78.6
PE(P-18:0_18:1)	1820	1400	1790	1480	1270	1820	1740	1840	1680	1730
PE(P-18:0_18:2)	910	724	877	799	706	866	805	923	853	883
PE(P-18:0_18:3)	155	120	154	127	108	141	144	149	143	140
PE(P-18:0_20:1)	295	232	298	246	200	314	290	300	259	283
PE(P-18:0_20:2)	109	104	119	120	271	41.9	38.9413	56	49.2	49
PE(P-18:0_20:3)	269	212	272	227	193	254	247	263	235	253
PE(P-18:0_20:4)	385	335	404	362	305	378	356	409	378	381
PE(P-18:0_20:5)	292	233	278	256	234	263	245	279	264	259
PE(P-18:0_22:2)	90.8	69.2	87.6	72.2	58.4	89	88.8	90.2	72.5	79.4
PE(P-18:0_22:4)	94.7	62.3	93	76.8	63.6	91.6	88	88.2	79.3	83.4
PE(P-18:0_22:6)	116	95	114	103	88.2	104	102	108	101	107
PE(P-18:1_22:6)	64.7	48.4	64.1	50	45.6	55.6	50.5	55.6	50.9	54.6
PE(P-20:0_16:0)	1.96688	1.2725	2.19544	1.60068	6.82428	1.76228	1.76464	2.45559	2.48815	2.37267
PE(P-20:0_20:4)	18.5	24.6	20.6	17.6	14.8	21.5	19	20.5	19.7	20.9
PE(P-20:0_22:4)	6.29491	4.19721	5.63919	5.10489	2.34572	6.49069	5.77587	5.67157	4.81544	5.08178
PE(P-20:0_22:6)	4.98772	3.89765	5.07378	5.11203	3.53431	15.8777	14.8448	22.1194	18.8454	18.0674
PG(16:0_16:1)	22.8	21.0968	23.3	26.4939	8.49072	24.5	24.5	28.6	26.1	26.3
PG(16:0_18:2)	11.1821	11.4677	9.42228	14.0296	6.46122	10.3083	11.8349	14.4448	11.1257	13.7211
PG(16:1_18:1)	11.5943	10.5353	11.0375	12.8277	6.76867	8.71755	9.403	10.1401	9.49055	9.32389
PG(18:0_18:2)	3.32301	4.58908	4.62605	3.61151	0	0	0	0	0	0
PG(18:0_20:4)	4.40307	3.68123	4.61108	5.38227	1.95123	2.02914	1.6723	2.22484	1.87574	1.96047
PG(18:1_16:0)	368	344	364	430	255	353	365	396	365	392
PG(18:1_17:0)	30.9	27.5	31.2	35.5	25.3	31.3	29	36.1	32.3	31.5
PG(18:1_18:0)	168	151	174	204	167	159	164	179	169	170
PG(18:1_18:1)	204	189	200	204	86.8	78.4	72.6	99.8	89.2	84.1
PG(18:1_18:2)	56.5	55.2	56.8	64	21.3013	23.7	24.2349	31.2	27.1	26.1
PG(18:1_18:3)	25	24.0453	25.3	26.851	6.51612	10.795	10.1651	13.2772	11.7722	11.0081
PG(18:1_20:3)	5.17548	4.52067	4.58586	5.89301	4.38244	3.4968	3.62938	4.55528	3.9932	3.76582
PG(18:1_20:4)	12.4168	11.3188	12.558	13.2771	5.56916	10.548	11.0327	14.6452	12.5066	11.991
PG(18:1_20:5)	4.91907	4.13379	4.65645	3.80046	0	8.5375	9.27323	11.7961	10.6271	10.0694
PG(18:1_22:6)	13.4404	12.8618	13.3733	14.3808	15.1897	49.6	51.2	62.3	55.2	54.6
PG(18:2_18:2)	4.88294	4.38364	5.31837	5.14499	1.79959	2.87941	3.34571	3.7518	3.59054	3.35052
PG(18:2_18:3)	0.583886	0	0	0	0	0	0	0	0	0
PG(18:2_20:4)	0	1.73724	1.58991	1.5678	0	1.80351	1.96941	2.45806	2.07118	2.194
PG(18:3_22:6)	0	0	0	0	0	1.62571	1.62241	2.68293	1.94167	1.72871
PG(20:3_22:6)	0	0	0	0	0	3.15063	2.95517	4.70956	3.72443	3.61011
PG(20:4_22:6)	0	0	0	0	0	2.28676	2.86579	3.55583	3.23232	3.00287
PG(20:5_22:6)	0	0	0	0	0	4.58633	4.46277	6.14733	5.40404	5.18701
PG(22:6_22:6)	0.431248	0	0.372573	0	0.948401	17.9031	17.7925	22.7	20.4224	18.9932
PI(14:0_18:1)	6.03447	4.08805	7.86161	7.43742	3.53268	4.39661	5.13282	6.03021	5.66879	6.62453
PI(16:0_16:0)	9.49553	5.90238	11.7453	12.2752	7.6984	12.077	11.8732	14.9768	15.0562	14.6633
PI(16:0_16:1)	4.34281	2.0693	5.56042	6.27936	1.65649	3.42546	2.8155	3.6369	3.65559	4.15325
PI(16:0_18:0)	7.59038	3.34264	8.68874	11.8243	12.3434	5.88611	6.91687	6.75153	6.889	8.72271
PI(16:0_18:1)	83	55.8	103	118	100	66.8	69	76	75.8	84.9
PI(16:0_20:3)	27.5954	20.2556	37.2118	38.1414	10.2554	13.4879	14.5198	16.6639	17.405	18.2721
PI(16:0_20:4)	27.3312	19.4267	36.4221	35.6444	8.59378	51.6	56.4	65.4	61.8	67.5
PI(16:0_20:5)	3.01748	2.17427	3.9545	3.60048	0.983098	5.44588	6.26137	7.92319	7.41379	7.10117
PI(16:0_22:6)	0.608833	0.130993	1.28283	1.66056	1.50778	2.78185	3.20905	3.27123	3.62166	3.48253
PI(16:1_18:1)	47.3	34.4745	59.3	62.3	33.3182	35.252	33.9694	42.3349	41.2102	44.8376
PI(17:0_18:1)	19.031	12.6388	25.3486	27.7971	16.4485	13.6475	14.7244	15.8731	15.8636	17.6589
PI(17:0_20:4)	11.6059	8.46961	15.3498	15.5266	3.77898	20.2863	22.4294	25.4914	25.1271	27.5945
PI(17:1_18:0)	0	0	0.142731	0	0	0	0	0	0	0
PI(17:1_18:1)	7.82498	5.79981	9.91526	10.4134	3.93244	5.80818	5.76982	5.35002	6.35889	5.59418
PI(18:0_18:1)	251	179	312	360	334	166	183	198	199	229
PI(18:0_18:2)	300	221	376	426	378	216	227	241	240	273
PI(18:0_18:3)	44.4	32.9057	54.4	63.6	46	32.3762	34.5579	37.6977	36.9317	40.1633
PI(18:0_19:1)	3.66911	1.95527	5.67384	5.29973	16.6795	0.537734	1.63701	1.70749	1.80528	2.00286
PI(18:0_20:1)	5.21547	2.40554	5.81776	4.92327	80.6	0.595637	1.05959	1.09374	0	1.20474
PI(18:0_20:2)	53.8	37.0176	66.6	78.8	362	16.9742	16.0106	18.0312	18.8324	20.9675
PI(18:0_20:3)	543	393	671	778	244	359	369	394	399	447
PI(18:0_20:4)	517	390	660	747	384	996	1100	1170	1160	1360
PI(18:0_20:5)	52.8	42.2848	66.5	72.5	58.6	81.9	87.6	97.1	97.4	105
PI(18:0_22:1)	0	0	0	0	5.59324	0	0	0	0	0
PI(18:0_22:2)	0	0	0	0	41.2	0	0	0	0	0
PI(18:0_22:4)	14.2372	8.50264	18.0028	22.3601	19.377	11.9691	12.0278	11.3004	10.4733	13.4113
PI(18:0_22:6)	19.7556	13.0873	23.2453	25.7211	36.4	27.4093	27.6697	30.8312	29.1127	33.9577
PI(18:1_18:2)	32.2703	23.2873	39.1452	43.1521	13.3608	28.3146	27.7082	32.4861	31.7751	34.0793
PI(18:1_19:1)	3.59069	1.23151	4.84464	4.1373	11.9831	1.00019	1.41895	1.06378	0	1.58705
PI(18:1_20:1)	1.97969	2.60464	3.84251	4.65512	30.637	1.01699	0.536179	0.955045	0.661885	0.789477
PI(18:1_20:3)	36.5131	26.0461	45.4	48.5916	13.4597	22.5358	22.9136	27.9664	29.2001	29.5773
PI(18:1_20:4)	120	92.1	150	167	109	179	187	218	206	228
PI(18:1_20:5)	22.8111	18.3044	26.8374	26.4988	19.5542	31.5444	33.2291	40.5779	38.6743	39.1039
PI(18:1_22:2)	5.35383	3.75465	6.46691	7.65578	31.0919	3.00894	2.7614	3.10765	3.45641	3.97336
PI(20:1_20:4)	73.9	51.3	89.7	104	89.2	91.2	97.9	104	101	120
PS(16:0_16:1)	16.3267	5.49562	20.2001	21.8275	0	12.4833	12.86	14.8679	14.6389	15.8633
PS(16:0_18:1)	83.4	39.69	104	121	25.9094	74.7	79.8	91.3	90.4	95
PS(16:0_18:2)	11.4591	4.64828	13.8326	15.9202	0.949729	8.88944	8.24134	8.79393	11.2242	10.2395
PS(18:0_18:1)	290	126	353	421	336	293	316	343	351	369
PS(18:0_18:2)	139	65.3	171	196	91.8	114	121	134	140	145
PS(18:0_18:3)	8.81713	2.22305	10.226	12.6654	1.6009	4.09424	5.4451	5.43173	3.89633	7.34201
PS(18:0_22:6)	3.34949	1.07487	4.27498	4.94301	11.9046	13.3674	14.5991	15.2797	15.8933	15.3802
SM 32:0	1.62147	1.18468	1.6056	1.27957	0.889175	1.72689	1.69877	1.53477	1.24567	1.48673
SM 32:1	24.7	20.2	25.5	21.8	17	26.8	26.2	23.5	21.4	23.1
SM 33:0	0.636392	0.551471	0.646066	0.458169	0.463467	0.819882	0.597684	0.560055	0.564476	0.54283
SM 33:1	42.1	34	43.6	36.5	28	45.2	43.3	39.5	35.8	39.6
SM 33:2	0.314819	0.25573	0.435388	0.379405	0.177404	0.415715	0.479868	0.323655	0.264058	0.377638
SM 34:0	73	57.4	71.3	60.3	48.1	80.5	72.8	66.8	58.6	63.9
SM 34:1	1080	905	1090	958	804	1190	1100	1030	975	1040
SM 35:0	3.03	2.16	2.3	2.42	1.56286	3.02	2.74	2.57	2.18	1.98647
SM 35:1	41.6	37.2	42.8	36.8	31.6	46.8	41.7	40.2	41.7	39.6
SM 36:0	11.2	7.17	9.74	7.93	6.11	11.6	9.62	9.89	7.27	7.72
SM 36:1	63.3	52.3	63.2	54.4	46.7	68.1	63.5	60.5	60.4	57.1
SM 36:2	21.5	17.8	21.3	18.2	15.5	22.6	20.5	19.9	19.8	19.1
SM 38:0	17.4	15.2	18.7	17.1	14.1	20.7	18.2	17.6	17.4	17.3
SM 38:2	2.87	3.24	2.58	2.54	2.66	2.99	3.4	2.72	3.08	3.53
SM 40:0	12.4	9.9	12.8	10.4	8.09	14.6	13.4	12.4	11.8	11.2
SM 40:1	77.1	64.8	82	69.5	54.1	90.7	87.3	80.8	78.3	75.3
SM 40:2	31.4	26	32.7	28.3	23.3	33.7	31.2	29.4	29.7	28.8
SM 41:1	13.8	11.4	15	12.5	9.58	16.2	14.5	13.3	12.4	13.3
SM 41:2	21.6	17.5	22.4	18.7	14.5	23.2	22.1	20.4	19.4	20.4
SM 42:1	65.1	53.5	68.5	57.1	42.7	77.9	74.1	68.5	62.9	61.7
SM 42:2	584	490	607	513	403	679	626	606	567	564
SM 43:1	1.70065	1.34721	1.72301	1.41497	1.04811	1.98004	1.75865	1.6159	1.59583	1.61176
SM 43:2	10.4	8.85	11.2	9.2	7.17	12.4	11.7	10.7	9.79	10.2
SM 44:0	0.306614	0.193395	0.400965	0.260251	0	0.516249	0.432037	0.308091	0.326771	0.239648
SM 44:2	6.23	4.9	6.54	5.43	3.93	7.26	6.67	6.51	5.82	5.81
TG(12:0_12:0_14:0)	1.13723	1.13736	1.06889	1.08765	1.20892	1.22571	1.16761	1.22135	1.1315	1.18393
TG(12:0_12:0_16:0)	1.65946	1.79	1.51749	1.56475	2.1	1.43922	1.66	2.17	1.52449	2.07
TG(12:0_14:0_15:0)	0.817924	0.737476	0.81042	0.78344	0.937135	0.815898	0.840977	0.960969	0.824732	0.830043
TG(12:0_14:0_16:0)	3.21	3.17	2.89	2.93	3.51	3.19	3.19	3.67	2.76	3.78
TG(12:0_14:0_16:1)	0.727461	0.805872	0.658308	0.62861	1.17017	0.593538	0.787012	1.26599	0.512127	1.26936
TG(12:0_14:0_18:1)	5.24	4.66	4.44	4.24	5.42	4.75	5.11	5.81	4.07	6.02
TG(12:0_14:1_16:1)	0.253772	0.274907	0.261179	0.194519	0.33016	0.239456	0.366495	0.464268	0.252544	0.511352
TG(12:0_15:0_18:1)	0.842098	0.686554	0.659531	0.622517	0.998172	0.659572	0.85325	0.970283	0.749791	0.982237
TG(12:0_16:0_17:0)	2.02	2.33	1.94	2.05	2.24	2.14	2.28	2.58	2.04	2.31
TG(12:0_16:0_20:5)	0.0795765	0.0463092	0.0484927	0.0470855	0	0.0836277	0.044441	0.046853	0	0
TG(13:0_14:0_16:0)	2.07	2.24	1.81	1.77	2.4	1.95	2.07	2.32	1.89	2.28
TG(14:0_14:0_16:0)	9.27	8.19	7.89	7.44	8.24	8.57	8.88	9.52	7.71	8.76
TG(14:0_14:0_17:0)	3.8	3.73	3.39	3.3	3.76	3.8	3.78	4.09	3.43	3.89
TG(14:0_14:1_15:0)	0.625898	0.659049	0.47393	0.501404	0.952492	0.472437	0.656077	0.876737	0.454454	0.836449
TG(14:0_14:1_18:2)	1.26653	1.1646	1.07391	0.883175	1.25794	1.06517	1.23582	1.2566	0.903267	1.34309
TG(14:0_15:0_16:0)	1.5374	1.4964	1.20315	1.2121	1.34283	1.47112	1.44807	1.4032	1.27128	1.36535
TG(14:0_15:0_16:1)	1.89	2.04	1.63	1.66	2.38	1.81	2.05	2.26	1.69537	2.29
TG(14:0_15:0_20:5)	0	0	0	0	0	0	0	0	0	0
TG(14:0_15:0_22:5)	1.03366	1.26329	0.981378	0.883829	0.820832	0.923317	0.798203	0.996768	0.944268	0.875294
TG(14:0_16:0_16:1)	31.8	26.2	27.7	24.6	25	30.6	30.5	30.5	26.4	28.9
TG(14:0_16:0_18:1)	127	106	118	104	93.5	130	120	121	115	114
TG(14:0_16:0_20:4)	2.13	1.75	2.01	1.51568	1.31329	1.66251	1.83	1.75	1.56352	1.57
TG(14:0_16:1_17:0)	6.36	6.02	6.36	4.71	5.7	6.97	6.51	6.6	5.93	6.24
TG(14:0_16:1_17:1)	4.93	4.91	4.29	3.85	5.63	4.65	5.21	5.56	4.28	5.61
TG(14:0_16:1_18:1)	50	42.1	45	40.2	39.5	48.6	46.9	47.5	43.2	44.7
TG(14:0_16:1_18:3)	1.66439	1.30757	1.64	1.26474	1.17976	1.64607	1.46413	1.47066	1.34923	1.37872
TG(14:0_16:1_20:5)	0.183314	0	0.147793	0	0	0	0	0	0	0
TG(14:0_17:0_18:0)	2.9	2.55	2.39	2.83	2.77	3.26	3.35	2.47	3.24	2.68
TG(14:0_17:0_18:1)	26.7	22	24.6	21.6	20.4	26.8	27.2	25.1	28	22.5
TG(14:0_18:1_18:3)	13.7	11.3	12.6	11	9.98	12.2	11.9	11.5	11.8	11.1
TG(14:0_18:2_20:4)	2.06	1.71	1.74	1.8	1.32875	1.78	1.76	1.49263	1.61035	1.61
TG(14:1_15:0_16:1)	0.618223	0.820944	0.565044	0.579345	1.3072	0.625674	0.861638	1.1322	0.593625	1.18179
TG(14:1_15:0_18:2)	0.613966	0.692851	0.561608	0.555401	0.987971	0.585153	0.791384	0.817512	0.438696	0.966336
TG(14:1_16:0_16:1)	8	7.32	7.25	6.69	8.15	7.51	7.9	8.47	6.67	8.27
TG(14:1_16:0_18:2)	9.24	7.82	8.15	7.45	7.65	8.36	8.59	8.61	7.9	8.21
TG(14:1_18:0_18:4)	2.06	1.59651	1.95	1.67	1.29301	1.78	1.6041	1.58738	1.51948	1.58
TG(15:0_15:0_16:0)	25.6	22.6	23	20.7	19.6	26.3	25	25.1	22.8	23.6
TG(15:0_15:0_17:0)	2.42	2.31	1.89	1.74	2.09	2.27	2.25	2.39	1.98	1.91
TG(15:0_16:0_16:0)	14	13.4	13.2	12.1	12.1	15	14.3	14.7	13.9	13.7
TG(15:0_16:0_16:1)	8.63	8.03	7.28	7.64	8.8	8.21	8.93	9.03	7.38	9.09
TG(15:0_16:0_17:0)	5.13	4.73	4.53	4.23	4.63	5.18	5.32	4.9	4.54	4.43
TG(15:0_16:0_18:1)	28.7	25.6	26.5	25	22.8	29.4	26	29.2	25.5	27.8
TG(15:0_16:0_22:5)	2.48	2.02	2.28	1.76	1.56292	1.99	2.04	1.83	1.93	1.75
TG(15:0_16:1_18:1)	41.3	39	37.5	36.4	38.8	39.9	39.8	41.1	39.4	38.3
TG(15:0_16:1_18:2)	5.23	4.94	4.67	4.28	5.07	4.97	5.05	5.19	4.68	5.24
TG(15:0_16:1_18:3)	0.759808	0.647812	0.651661	0.587306	0.573387	0.618021	0.666375	0.596343	0.444947	0.659739
TG(15:0_16:1_20:5)	0	0	0	0	0	0	0	0	0	0
TG(15:0_17:0_18:0)	97.4	77	85.8	78	69.4	100	97.5	92.3	93	81.9
TG(15:0_17:0_19:1)	16	12.9	10.1	11.4	11.4	15.7	13	13	15	12
TG(15:0_18:1_18:3)	6.12	5.56	5.54	5.06	4.8	5.85	5.44	5.54	5.53	5.11
TG(15:0_18:1_22:5)	5.81	5.05	5.17	4.76	4.09	5.04	4.55	4.44	4.74	4.29
TG(15:0_18:2_20:5)	0	0	0	0	0	0	0	0	0	0
TG(15:0_18:2_22:5)	2.66	3.12	2.13	1.18217	2.98	1.91	4.03	1.03856	2.76	1.45606
TG(16:0_16:0_16:0)	56.8	45.5	50.1	45.7	41.4	61.6	57.9	54.6	55.6	51.9
TG(16:0_16:0_17:0)	26.1	22.3	23.4	22.5	20.2	27.4	26.4	26	26.3	22.8
TG(16:0_16:0_18:1)	338	270	299	274	248	353	325	311	326	293
TG(16:0_16:1_18:1)	243	205	229	205	180	245	224	228	225	211
TG(16:0_16:1_18:2)	65.6	55	59.5	53.2	48.9	61.5	59	58.6	57	54.9
TG(16:0_16:1_20:5)	2.15	1.55919	2.05	1.73	1.38647	1.60371	1.36061	1.46776	1.46973	1.44449
TG(16:0_17:0_18:0)	32.2	28.1	29.2	27.1	23.7	34.9	32.3	31.5	33	28.6
TG(16:0_17:0_18:1)	63.8	51.2	59.1	54.4	46.7	61.9	60.8	59.5	61.9	51.8
TG(16:0_17:0_19:0)	3.9	3.11	3.54	3.08	2.66	3.9	3.75	3.53	3.61	3
TG(16:0_17:0_22:5)	21.9	18.6	19.2	17.8	15.6	19.7	18	17.8	19.1	17.1
TG(16:0_17:1_18:0)	58.1	49.4	53.5	49.4	43.9	61.3	57.9	56.1	60.1	52.1
TG(16:0_17:1_18:1)	98.3	83.5	89.1	81.3	72.4	97.2	88.7	89.8	90.7	84.2
TG(16:0_17:1_22:6)	0.638467	0.531742	0.493778	0.527844	0.356317	0.483116	0.375057	0.465136	0.374129	0.37499
TG(16:0_18:0_18:0)	103	85.2	91.7	84.9	69.8	106	107	101	99.2	90.3
TG(16:0_18:0_18:1)	533	415	462	417	374	524	506	483	503	435
TG(16:0_18:0_19:0)	10.4	8.53	9.7	8.69	7.49	11.1	10.7	10.3	10.5	8.95
TG(16:0_18:0_20:4)	216	180	201	185	156	209	193	193	197	183
TG(16:0_18:0_21:0)	1.31703	1.04747	1.12246	1.0869	1.02995	1.29146	1.34887	1.31164	1.19821	1.14697
TG(16:0_18:0_22:0)	7.56	6.13	6.46	5.75	5.04	7.46	7.79	6.95	6.52	6.29
TG(16:0_18:0_22:5)	25	21.9	23.4	22	19.2	23.7	20.2	21.5	23.4	20.6
TG(16:0_18:1_18:1)	724	578	650	596	529	736	673	654	703	615
TG(16:0_18:1_18:2)	287	242	270	249	211	283	264	263	267	246
TG(16:0_18:1_18:3)	85.6	72.9	78.5	71.7	64.2	80.4	76.7	74.6	75.1	69.8
TG(16:0_18:1_22:5)	64.3	54.3	61.7	56.4	46.4	58.1	53.5	54.1	55.2	50.4
TG(16:0_18:2_22:5)	20.5	17.3	19.3	17.8	14.9	17.3	16.6	16.1	16.5	15.6
TG(16:0_20:2_20:3)	25.9	18.3	24.4	21.9	16	25.7	23.2	20.1	19.6	18.9
TG(16:0_20:4_20:5)	0.668064	0.539231	0.630404	0.563028	0.316493	0.535979	0.508188	0.484447	0.507541	0.474614
TG(16:0_20:4_22:6)	0.168525	0.138615	0.109343	0.110414	0.0466605	0.139946	0.154036	0.140986	0.144271	0.0965751
TG(16:0_20:5_22:5)	1.09566	0.948231	1.05765	0.931469	0.706169	0.825269	0.802244	0.709605	0.810138	0.841094
TG(16:0_22:5_22:6)	0.580675	0.475445	0.646683	0.645989	0.393975	0.654063	0.475444	0.640144	0.607732	0.44031
TG(16:1_17:1_18:1)	26.5	23.5	23.7	21.6	20.5	25.5	24	23.8	24.4	22.7
TG(16:1_18:0_18:4)	19.5	16.8	17.9	16.1	14.4	17.5	16.4	16.1	16	15.5
TG(16:1_18:0_20:4)	89.5	75.8	83.2	76.5	66.5	81.8	77.3	75.4	76.8	71.2
TG(16:1_18:1_19:1)	39.9	33.9	35.1	32.2	28.4	38.2	34.5	35.9	38	34.5
TG(16:1_18:1_20:4)	29.7	25.1	27.5	24.9	21.4	25.2	24.1	23.8	23.5	22.9
TG(16:1_18:1_20:5)	6.01	4.91	5.66	5.05	4.21	4.61	4.46	4.33	4.26	4.24
TG(16:1_18:1_22:6)	7.82	6.59	7.36	6.7	5.43	6.14	5.8	5.52	5.9	5.66
TG(16:1_20:5_22:5)	0.109486	0	0.149223	0.0984482	0	0.166435	0.127996	0.0870929	0.0235025	0.135872
TG(17:0_17:0_18:1)	15.8	11.4	14	11.8	9.58	14.4	13	12.7	13.5	11.5
TG(17:0_17:1_19:1)	34.5	29.4	23.1	21.5	24.6	33.5	28.6	27.4	33.8	26.6
TG(17:0_18:0_18:1)	86.2	72.2	78.5	70.3	61.8	89.7	85.7	83.8	85.6	75
TG(17:0_18:0_22:5)	6.17	5.35	5.64	5.35	4.54	5.79	5.8	5.26	6.05	5.12
TG(17:0_18:1_18:1)	113	94.4	103	93.4	78.9	116	104	99.6	106	93.8
TG(17:0_18:1_18:2)	33.4	27.7	30.9	25.7	23.4	29.4	29.2	28.6	29.9	26.3
TG(17:0_18:1_20:0)	25.6	20.6	24.3	20	17.9	26.6	26.2	24.5	25	22.1
TG(17:0_18:1_20:5)	1.32214	1.096	1.33289	1.13032	0.966543	1.06123	1.04148	0.64277	1.03382	1.06692
TG(17:0_18:1_22:1)	32.1	27.5	27.1	24.4	23.1	33.4	31.7	29.4	32.3	27
TG(17:0_18:1_22:5)	11.6	9.82	10.4	9.52	8.23	10.2	9.83	9.72	10.1	9.2
TG(17:0_20:3_22:5)	2.96	2.53	2.54	2.14	1.88	2.43	2.1	2.27	2.31	1.96
TG(17:0_20:5_22:5)	0	0	0	0	0	0	0	0	0	0
TG(17:1_18:0_18:2)	17.6	14.3	13.9	13.1	13.3	16.1	15.5	15.4	15.5	13.5
TG(17:1_18:0_18:3)	8.19	4.96	5.2	5.58	5.21	5.45	5.12	7.1	5.32	4.89
TG(17:1_18:1_18:2)	16	16.1	15.2	14	12.6	16.9	15.2	13.5	16.5	14.7
TG(17:1_18:1_18:3)	2.46	1.95	2.03	1.91	1.92	2.12	1.78	1.89	1.97	1.8
TG(17:1_18:1_22:5)	4.63	4.36	4.34	3.97	3.58	4.01	3.97	3.77	4.04	3.59
TG(17:1_18:1_22:6)	0.764492	0.616275	0.760405	0.683759	0.485081	0.598153	0.599858	0.514709	0.561264	0.537688
TG(17:1_18:2_18:3)	1.72204	1.46617	1.40118	1.28725	0.997804	1.44699	1.31321	1.2084	1.19118	1.11414
TG(17:1_18:2_22:5)	0.976719	0.902472	0.937569	0.830317	0.758159	0.797874	0.843839	0.641346	0.850405	0.706627
TG(18:0_18:0_18:0)	24	18.9	20.9	19.1	16.6	24	24.1	23	21.8	19.8
TG(18:0_18:0_18:1)	304	247	266	240	205	309	302	287	288	258
TG(18:0_18:0_22:5)	7.99	5.95	7.2	6.69	5.07	6.78	6.74	6.41	6.26	5.86
TG(18:0_18:1_18:1)	792	609	689	619	545	765	735	715	715	637
TG(18:0_18:1_18:2)	241	204	267	207	172	246	241	238	242	210
TG(18:0_18:1_19:1)	129	106	110	100	91.4	129	122	119	125	106
TG(18:0_18:1_20:0)	98.1	76.5	83.9	72.7	63.4	99.1	94.5	90.7	87.3	78.4
TG(18:0_18:1_20:1)	373	297	326	288	248	374	360	345	338	311
TG(18:0_18:1_20:2)	144	13.9	128	13.7	103	149	144	143	142	76.6
TG(18:0_18:1_20:3)	22.1	18.6	19.7	18.1	14.2	22.9	18.7	21.5	18.4	16.6
TG(18:0_18:1_20:5)	9.91	9.02	9.5	9.16	7.71	8.77	8.91	8.4	7.44	8.29
TG(18:0_18:1_21:0)	7.14	5.54	6.07	5.37	4.95	6.83	6.86	6.73	6.09	5.83
TG(18:0_18:1_22:0)	21.2	15.1	17.3	14	11.8	19.7	20.2	18	16.6	15.7
TG(18:0_18:1_22:1)	178	136	153	129	113	181	167	161	151	141
TG(18:0_18:1_22:5)	45.4	39.8	37.8	40.8	32.3	38.8	38.4	35.8	37.7	33.3
TG(18:0_18:1_22:6)	14.5	11.6	13.3	12.2	9.75	12.2	11.5	11.1	11.3	10.5
TG(18:0_18:2_20:1)	74	77.5	66.2	66.3	53.5	88.9	75.6	74.5	63.6	76
TG(18:0_18:2_20:5)	17.2	14.5	15.8	14.3	12	14.1	12.8	12.4	12.6	12.1
TG(18:0_18:2_22:4)	32.5	25.6	34	26.2	25.9	36.6	33.8	32.8	32.7	31.4
TG(18:0_18:2_22:5)	14.4	12.9	13.9	12.4	11.1	13.2	13.1	13	13.4	12.2
TG(18:0_20:0_20:1)	25.9	20.1	22.9	20.6	15.8	26.3	27	24.8	21.8	20.9
TG(18:0_20:1_20:3)	6.15	18.6	20.2	18	16	23.4	23.4	23.2	22.4	20.8
TG(18:0_20:1_22:5)	9.76	8.27	10.9	7.82	7.57	9.81	9.81	8.96	9.58	8.55
TG(18:0_20:3_22:4)	8.24	6.88	7.47	7.01	6.58	7.78	7.68	7.74	7.95	6.87
TG(18:0_20:3_22:5)	6.85	5.6	6.6	5.81	4.97	6.24	5.63	5.67	5.86	5.5
TG(18:0_20:4_22:5)	2.68	2.24	2.47	2.37	1.89	2.37	2.37	2.3	2.22	2.25
TG(18:0_20:5_22:5)	0.585038	0.447507	0.351909	0.478209	0.235622	0.31226	0.272344	0.368529	0.461304	0.457844
TG(18:0_22:1_22:5)	5.75	4.9	5.21	3.99	3.36	5.83	4.15	5.41	5.05	4.27
TG(18:0_22:3_22:5)	2.23	1.72	1.96	1.65	1.43143	1.91	1.68	1.69742	1.67218	1.56
TG(18:0_22:4_22:5)	1.40074	1.14131	1.1752	1.12313	1.08301	1.10844	0.863911	1.05956	1.07811	0.852461
TG(18:0_22:5_22:5)	0.953715	0.823314	1.0128	0.781437	0.627677	0.896387	0.976655	0.686465	0.857149	0.702044
TG(18:1_18:1_18:1)	388	304	293	316	287	373	331	325	355	303
TG(18:1_18:1_20:1)	284	213	235	219	194	313	253	246	251	258
TG(18:1_18:1_20:2)	160	128	144	130	114	152	146	143	149	128
TG(18:1_18:1_22:4)	17.6	13	15.1	16.5	12.6	18.7	15.3	15.6	15.7	14.2
TG(18:1_18:1_22:5)	34.3	28.5	31.9	30.1	24.5	30.2	27.2	27.1	27.8	26.3
TG(18:1_18:1_22:6)	16.1	13.8	14.8	13.6	11.4	13.2	12.1	11.9	12.1	11.4
TG(18:1_18:2_19:0)	69.1	55.7	61	53.6	48	68.8	63.4	61	66.3	56.4
TG(18:1_18:2_19:1)	24.2	19.4	21.8	19.9	18.2	23.5	21.6	21.4	22.2	19.3
TG(18:1_18:2_20:2)	49.8	42.1	45.2	41.2	34	47	40.9	47	48.5	43.5
TG(18:1_18:2_22:6)	0.418242	0.372634	0.410813	0.306648	0.291032	0.311663	0.340028	0.304628	0.301518	0.262469
TG(18:1_18:3_22:5)	4.12	3.36	3.59	3.61	2.83	3.26	2.94	3.02	3.07	2.98
TG(18:1_19:0_22:1)	9.07	7.24	7.81	6.57	5.77	8.75	8.3	8.01	7.73	6.97
TG(18:1_19:0_22:5)	5.96	4.7	5.45	4.84	4.1	5.81	5.02	5.08	5.11	4.52
TG(18:1_19:1_20:0)	22.3	17.7	20	16.8	14.1	22.4	21.1	20.7	19.3	17.6
TG(18:1_19:1_20:1)	32.9	31.3	29.2	26.2	23.2	33.5	31.5	35.8	31.5	27.7
TG(18:1_19:1_20:2)	11.9	7.71	9.27	8.64	6.62	10.3	9.54	8.3	9.22	7.47
TG(18:1_19:1_20:3)	7.8	6.28	6.61	6.2	5.6	6.7	5.9	6.31	7.17	5.83
TG(18:1_19:1_22:1)	16.8	12.9	14.9	12.2	10.4	16.2	17.8	15.1	16.3	13.1
TG(18:1_19:1_22:2)	3.65	2.98	3.44	2.47	3.48	3.66	3.99	3.68	2.95	2.58
TG(18:1_19:1_22:4)	4.8	4.14	4.33	4.02	3.86	4.2	4.36	4.05	4.98	3.84
TG(18:1_19:1_22:5)	9.43	8	8	7.67	6.65	8.31	7.6	7.49	8.2	7.09
TG(18:1_20:1_20:1)	224	174	195	169	145	222	209	202	197	182
TG(18:1_20:1_20:2)	36.1	28.7	39.8	27.7	21.7	45	29.6	29.3	28.7	26.9
TG(18:1_20:1_20:3)	30.1	23.3	24	23.3	18.6	27	23.8	24.2	24.6	22
TG(18:1_20:1_22:0)	64.1	46.7	56.3	47.2	38	64.2	64.1	58.7	51.5	49.8
TG(18:1_20:1_22:1)	142	108	121	102	87.9	141	130	126	117	111
TG(18:1_20:1_22:3)	25.8	20.2	23.2	19.6	17.1	24.4	23	23.3	22.2	20
TG(18:1_20:1_22:4)	11.1	7.83	9.41	8.24	7.5	11	9.53	9.09	10	8.6
TG(18:1_20:1_22:5)	22.9	19.3	24.2	20.3	19	21.2	22.3	21.1	21.7	20.9
TG(18:1_20:2_20:2)	43.8	36.8	43.3	35.6	32.2	43.6	42.5	41	42.1	37
TG(18:1_20:2_22:1)	62.9	47.4	54.8	46	39.4	61.1	58.2	55.4	51.8	48.8
TG(18:1_20:2_22:4)	21	15	16.6	15.1	11.3	21	16.8	15.3	16.9	14.8
TG(18:1_20:3_20:4)	5.4	4.56	4.94	4.65	3.84	4.83	4.44	4.65	4.88	4.64
TG(18:1_20:3_22:4)	12.7	10.7	11.5	10.7	8.54	11.9	11.1	10.5	11	10.4
TG(18:1_20:3_22:5)	2.9	2.31	2.55	2.29	2.02	2.32	2.36	2.22	2.47	2.12
TG(18:1_20:3_22:6)	1.78306	1.6017	1.98	1.67	1.52559	1.83	1.62863	1.23036	1.49766	1.59
TG(18:1_20:5_22:5)	0.478258	0.393954	0.419764	0.249837	0.347802	0.332008	0.347899	0.200011	0.205385	0.343227
TG(18:1_22:1_22:1)	56.4	41.5	49.1	40.9	33.1	54.4	54.4	49.7	44.2	43.1
TG(18:1_22:1_22:5)	3.49	2.86	4.05	2.95	2.71	3.21	3.37	3.11	3.13	3.03
TG(18:1_22:3_22:5)	3.26	2.51	3.03	2.77	2.29	2.76	2.69	2.61	2.89	2.79
TG(18:1_22:4_22:5)	2.01	1.78	1.88	1.65	1.45821	1.81	1.73	1.66576	1.83	1.78
TG(18:1_22:5_22:5)	1.55137	1.36682	1.52265	1.37412	1.01663	1.37414	1.22711	1.24023	1.32485	1.22204
TG(18:1_22:5_22:6)	0.431271	0.355055	0.450271	0.429115	0.294231	0.431916	0.367398	0.403224	0.438905	0.36887
TG(18:2_19:1_22:1)	2.43	2.45	2.43	2.31	1.97	3.48	2.54	2.85	2.79	2.46
TG(18:2_20:2_22:5)	1.30333	1.1022	1.46115	1.09361	0.952535	1.16257	0.910252	1.32858	1.21505	1.08353
TG(18:2_20:3_22:5)	0.726444	0.451595	0.541267	0.48586	0.435723	0.583769	0.47635	0.54631	0.400382	0.400775
TG(18:2_20:5_22:5)	0	0	0	0	0	0	0	0	0	0
TG(18:2_22:5_22:6)	0	0	0	0	0	0	0	0	0	0
TG(20:1_20:1_20:4)	32.4	25.2	28.8	26.3	21.2	29.3	28.8	28.6	28.1	25.3
TG(20:1_20:1_22:5)	19	15.7	17.4	16	13.1	19	18.3	17.7	17.9	16.2
TG(20:1_20:2_22:5)	7.55	6.2	7.01	6.61	5.62	7.4	7.24	6.69	7.27	6.19
TG(20:1_20:3_22:1)	16.1	11.7	13.4	11.2	9.57	14.6	14.2	13.2	12	11.6
TG(20:1_20:4_22:1)	8.8	6.7	7.87	7.02	5.67	8.91	8.79	7.44	7.28	6.69
TG(20:1_22:0_22:2)	27.9	28.1	23.8	28.8	23.9	3.6	29	32.9	27.9	22.3
TG(20:1_22:1_22:2)	3.33	2.43	2.52	2.37	1.81	2.47	2.7	2.63	2.26	2.48
TG(20:1_22:1_22:5)	5	3.64	4.48	3.84	2.95	4.45	4.5	4.29	3.83	3.93
TG(20:1_22:2_22:5)	0.918379	0.625458	0.751861	0.580494	0.527317	0.795626	0.782652	0.656763	0.601834	0.645849
TG(20:1_22:3_22:5)	1.09113	0.669442	1.07953	0.99813	1.12143	1.06913	1.39845	0.931075	1.00398	0.92913
TG(20:2_22:2_22:4)	3.56	2.78	2.98	2.65	2.34	3.26	3.02	3.11	2.98	2.88
TG(20:2_22:3_22:5)	1.23741	1.17697	1.20576	1.06623	0.917734	1.29238	1.13844	1.26495	1.18816	1.09604
TG(20:2_22:5_22:5)	0.116331	0.464694	0.0253461	0.0269693	0	0.0337394	0.0558929	0.0187208	0.0213521	0.0491526
TG(20:3_20:5_22:6)	0	0	0	0	0	0	0	0	0	0
TG(20:3_22:3_22:5)	1.59137	1.21876	1.49075	1.21583	0.915259	1.39912	1.37609	1.41428	1.38103	1.36551

## Sheet: NOMO1_Differential analysis
Supplementary Table S4C: Differential analysis output by LipidSuite of NOMO1 cells.
Molecule	Class	total_chain_length	total_unsaturation	logFC	P.Value	adj.P.Val
CE(16:1)	CE	16	1	0.247	0.0902	0.167
CE(18:1)	CE	18	1	0.612	9.56e-05	0.000386
CE(18:2)	CE	18	2	0.0792	0.807	0.913
CE(18:3)	CE	18	3	0.000447	0.997	1
CE(20:4)	CE	20	4	0.0806	0.962	1
CE(20:5)	CE	20	5	0.207	0.218	0.343
CE(22:5)	CE	22	5	-1.5	4.88e-05	0.000213
CE(22:6)	CE	22	6	-2.73	0.0167	0.0405
Cer(d16:2_24:0)	Cer	40	2	0.0643	0.61	0.739
Cer(d18:0_16:0)	Cer	34	0	0.14	0.192	0.309
Cer(d18:0_17:0)	Cer	35	0	0	1	1
Cer(d18:0_18:0)	Cer	36	0	0.17	0.194	0.312
Cer(d18:0_20:0)	Cer	38	0	0.0816	0.514	0.643
Cer(d18:0_22:0)	Cer	40	0	-0.028	0.826	0.926
Cer(d18:0_23:0)	Cer	41	0	0.035	0.702	0.821
Cer(d18:0_24:0)	Cer	42	0	-0.154	0.205	0.327
Cer(d18:1_16:0)	Cer	34	1	-0.0764	0.442	0.581
Cer(d18:1_17:0)	Cer	35	1	-0.2	0.118	0.212
Cer(d18:1_18:0)	Cer	36	1	-0.121	0.242	0.372
Cer(d18:1_19:0)	Cer	37	1	-0.0435	0.674	0.795
Cer(d18:1_20:0)	Cer	38	1	-0.0971	0.391	0.532
Cer(d18:1_22:0)	Cer	40	1	-0.111	0.385	0.527
Cer(d18:1_23:0)	Cer	41	1	-0.196	0.123	0.219
Cer(d18:1_24:0)	Cer	42	1	-0.335	0.0196	0.0468
Cer(d18:1_24:1)	Cer	42	2	0.0702	0.564	0.689
Cer(d18:1_26:0)	Cer	44	1	-0.325	0.00853	0.0225
Cer(d18:1_26:1)	Cer	44	2	0	1	1
Cer(d18:2_16:0)	Cer	34	2	0.0746	0.493	0.627
Cer(d18:2_18:0)	Cer	36	2	-0.141	0.222	0.346
Cer(d18:2_20:0)	Cer	38	2	0	1	1
Cer(d18:2_22:0)	Cer	40	2	-0.0588	0.659	0.781
Cer(d18:2_23:0)	Cer	41	2	-0.112	0.445	0.584
Cer(d18:2_24:0)	Cer	42	2	-0.181	0.144	0.245
Cer(d18:2_26:0)	Cer	44	2	0	1	1
DG(14:0_16:0)	DG	30	0	0.472	0.111	0.2
DG(14:0_18:1)	DG	32	1	0.449	0.0114	0.0291
DG(16:0_16:0)	DG	32	0	0.369	0.000311	0.00113
DG(16:0_17:0)	DG	33	0	0.397	0.00348	0.00997
DG(16:0_17:1)	DG	33	1	0.481	0.00678	0.0182
DG(16:0_18:0)	DG	34	0	0.375	0.00183	0.00557
DG(16:0_18:1)	DG	34	1	0.412	0.000208	0.000788
DG(16:0_18:2)	DG	34	2	0.284	0.00931	0.0243
DG(16:0_20:1)	DG	36	1	0.386	0.000321	0.00116
DG(16:0_20:3)	DG	36	3	0.251	0.0124	0.0313
DG(16:0_20:4)	DG	36	4	-0.723	0.000253	0.000949
DG(16:0_22:1)	DG	38	1	0.501	2.83e-05	0.000129
DG(16:0_22:6)	DG	38	6	-1.65	7.7e-06	4.02e-05
DG(17:0_18:1)	DG	35	1	0.544	0.000164	0.000632
DG(17:0_22:5)	DG	39	5	-0.782	1.95e-06	1.27e-05
DG(17:1_18:0)	DG	35	1	0.366	0.00273	0.008
DG(18:0_18:0)	DG	36	0	0.292	0.0134	0.0336
DG(18:0_18:2)	DG	36	2	0.193	0.0109	0.0281
DG(18:0_18:3)	DG	36	3	0.159	0.106	0.193
DG(18:0_20:3)	DG	38	3	0.563	0.000108	0.000433
DG(18:0_20:4)	DG	38	4	-0.878	8.35e-07	6.43e-06
DG(18:0_22:4)	DG	40	4	0.139	0.178	0.292
DG(18:1_18:1)	DG	36	2	0.411	0.000518	0.00177
DG(18:1_18:2)	DG	36	3	0.0581	0.543	0.669
DG(18:1_18:3)	DG	36	4	0.0535	0.603	0.733
DG(18:1_19:0)	DG	37	1	0.393	0.0601	0.119
DG(18:1_20:1)	DG	38	2	0.845	7.08e-06	3.73e-05
DG(18:1_20:4)	DG	38	5	-0.557	6.83e-05	0.000287
DG(18:1_22:4)	DG	40	5	-0.639	0.000328	0.00118
DG(18:1_22:5)	DG	40	6	-0.999	1.86e-06	1.24e-05
DG(18:2_18:2)	DG	36	4	0.0366	0.758	0.872
DG(19:1_18:1)	DG	37	2	0.551	0.00469	0.0132
DG(20:1_20:2)	DG	40	3	0	1	1
GM3(d18:1_16:0)	GM3	34	1	-0.199	0.136	0.235
Hex2Cer(d18:1_16:0)	Hex2Cer	34	1	-0.2	0.0446	0.0935
Hex2Cer(d18:1_18:0)	Hex2Cer	36	1	-0.292	0.0369	0.0803
Hex2Cer(d18:1_20:0)	Hex2Cer	38	1	-0.284	0.0215	0.0508
Hex2Cer(d18:1_22:0)	Hex2Cer	40	1	-0.266	0.0406	0.0872
Hex2Cer(d18:1_24:0)	Hex2Cer	42	1	-0.242	0.0491	0.1
Hex2Cer(d18:1_24:1)	Hex2Cer	42	2	-0.044	0.697	0.818
Hex2Cer(d18:1_26:1)	Hex2Cer	44	2	0	1	1
LPC(14:0)	LPC	14	0	0.285	0.0224	0.052
LPC(15:0)	LPC	15	0	0.276	0.00928	0.0243
LPC(16:0)	LPC	16	0	0.216	0.0522	0.105
LPC(16:1)	LPC	16	1	0.458	0.000895	0.00292
LPC(17:0)	LPC	17	0	0.174	0.105	0.192
LPC(18:0)	LPC	18	0	0.222	0.0453	0.0948
LPC(18:1)	LPC	18	1	0.379	0.00349	0.00997
LPC(18:2)	LPC	18	2	0.6	0.000416	0.00145
LPC(18:3)	LPC	18	3	0	1	1
LPC(19:0)	LPC	19	0	0.201	0.132	0.23
LPC(19:1)	LPC	19	1	0	1	1
LPC(20:0)	LPC	20	0	-0.361	0.327	0.467
LPC(20:1)	LPC	20	1	0	1	1
LPC(20:2)	LPC	20	2	0	1	1
LPC(20:3)	LPC	20	3	0.127	0.364	0.508
LPC(20:4)	LPC	20	4	-0.631	0.00029	0.00107
LPC(20:5)	LPC	20	5	-0.934	3.13e-06	1.94e-05
LPC(22:5)	LPC	22	5	-0.117	0.373	0.516
LPC(22:6)	LPC	22	6	0	1	1
LPC(O-16:0)	LPCO	16	0	-0.748	0.382	0.524
LPC(O-18:0)	LPCO	18	0	-0.519	0.358	0.502
LPC(O-18:1)	LPCO	18	1	-0.286	0.454	0.592
LPE(16:0)	LPE	16	0	0.641	0.000179	0.000682
LPE(17:0)	LPE	17	0	-0.217	0.16	0.266
LPE(18:0)	LPE	18	0	0.349	0.00315	0.00908
LPE(18:1)	LPE	18	1	0.838	5.93e-05	0.000252
LPE(18:2)	LPE	18	2	1.67	5.24e-08	1.12e-06
LPE(20:1)	LPE	20	1	0.283	0.391	0.532
LPE(20:4)	LPE	20	4	-1.01	9.4e-06	4.79e-05
LPE(20:5)	LPE	20	5	-0.978	5.57e-06	3.1e-05
LPE(22:5)	LPE	22	5	0.026	0.817	0.921
LPE(P-20:0)	LPEP	20	0	-0.114	0.487	0.623
PC(10:0_16:0)	PC	26	0	0	1	1
PC(10:0_18:1)	PC	28	1	-0.159	0.188	0.303
PC(10:0_19:0)	PC	29	0	-0.253	0.0543	0.109
PC(10:0_21:0)	PC	31	0	-0.259	0.0153	0.0378
PC(10:0_22:0)	PC	32	0	-0.335	0.00452	0.0128
PC(10:0_23:0)	PC	33	0	-0.283	0.00836	0.0222
PC(10:0_24:0)	PC	34	0	-0.393	0.00186	0.00562
PC(10:0_25:0)	PC	35	0	-0.25	0.0495	0.1
PC(11:0_16:0)	PC	27	0	0	1	1
PC(11:0_25:0)	PC	36	0	-0.141	0.25	0.381
PC(12:0_17:1)	PC	29	1	-0.18	0.162	0.268
PC(12:0_18:1)	PC	30	1	-0.0798	0.5	0.627
PC(12:0_18:2)	PC	30	2	-0.264	0.048	0.0986
PC(12:0_18:3)	PC	30	3	0	1	1
PC(12:0_19:1)	PC	31	1	0.047	0.62	0.745
PC(12:0_20:1)	PC	32	1	0.0403	0.655	0.778
PC(12:0_20:3)	PC	32	3	-0.257	0.0522	0.105
PC(12:0_22:1)	PC	34	1	-0.0513	0.485	0.623
PC(12:0_22:2)	PC	34	2	0.0061	0.944	1
PC(12:0_22:4)	PC	34	4	-0.278	0.0467	0.0962
PC(12:0_26:0)	PC	38	0	-0.0263	0.348	0.489
PC(13:0_18:2)	PC	31	2	-0.158	0.222	0.346
PC(13:0_20:1)	PC	33	1	0.0655	0.456	0.592
PC(13:0_20:2)	PC	33	2	0.121	0.21	0.333
PC(13:0_20:3)	PC	33	3	-0.0614	0.633	0.756
PC(13:0_20:4)	PC	33	4	-0.0119	0.414	0.555
PC(13:0_22:1)	PC	35	1	-0.0227	0.797	0.903
PC(13:0_22:2)	PC	35	2	0.136	0.145	0.246
PC(13:0_22:4)	PC	35	4	-0.348	0.0103	0.0267
PC(14:0_14:0)	PC	28	0	-0.235	0.0859	0.16
PC(14:0_16:0)	PC	30	0	-0.401	0.00106	0.00339
PC(14:0_20:3)	PC	34	3	0.0198	0.83	0.93
PC(14:0_20:5)	PC	34	5	-1.05	1.09e-05	5.41e-05
PC(14:0_22:4)	PC	36	4	-0.0237	0.791	0.902
PC(14:0_22:6)	PC	36	6	-1.16	8.98e-06	4.62e-05
PC(14:0_24:1)	PC	38	1	0.0694	0.537	0.663
PC(14:0_26:0)	PC	40	0	0	1	1
PC(14:1_22:2)	PC	36	3	0.0637	0.487	0.623
PC(14:1_22:6)	PC	36	7	-1.06	1.43e-06	1.02e-05
PC(15:0_20:5)	PC	35	5	-1.23	5.55e-06	3.1e-05
PC(15:0_22:1)	PC	37	1	0.146	0.207	0.329
PC(15:0_22:2)	PC	37	2	0.111	0.233	0.36
PC(15:0_22:4)	PC	37	4	-0.88	3.63e-06	2.15e-05
PC(15:0_22:6)	PC	37	6	-1.3	3.3e-06	2.02e-05
PC(15:1_22:2)	PC	37	3	-0.125	0.179	0.293
PC(15:1_22:4)	PC	37	5	-1.07	1.4e-06	1.01e-05
PC(16:0_20:4)	PC	36	4	-1.05	3.43e-06	2.07e-05
PC(16:0_20:5)	PC	36	5	-1.14	1.77e-06	1.2e-05
PC(16:0_22:5)	PC	38	5	-0.881	5.06e-06	2.89e-05
PC(16:0_23:5)	PC	39	5	-0.484	0.000777	0.00256
PC(16:0_24:1)	PC	40	1	-0.00985	0.927	1
PC(16:0_26:0)	PC	42	0	0	1	1
PC(16:0_26:2)	PC	42	2	0	1	1
PC(16:1_22:2)	PC	38	3	-0.242	0.0227	0.0526
PC(16:1_22:6)	PC	38	7	-1.08	1.98e-05	9.17e-05
PC(16:1_24:1)	PC	40	2	0.217	0.114	0.205
PC(17:0_20:0)	PC	37	0	-0.24	0.0465	0.096
PC(17:0_22:1)	PC	39	1	0	1	1
PC(17:0_22:2)	PC	39	2	0.219	0.158	0.263
PC(17:0_22:4)	PC	39	4	-0.547	0.000138	0.000538
PC(17:0_22:6)	PC	39	6	-0.825	5.35e-06	3.03e-05
PC(17:1_22:2)	PC	39	3	-0.148	0.252	0.382
PC(17:1_22:6)	PC	39	7	-1.38	5.81e-06	3.18e-05
PC(18:0_18:1)	PC	36	1	0.024	0.795	0.903
PC(18:0_20:4)	PC	38	4	-0.671	4.3e-05	0.00019
PC(18:0_22:3)	PC	40	3	-0.0245	0.831	0.93
PC(18:0_22:4)	PC	40	4	-0.306	0.00354	0.0101
PC(18:0_22:5)	PC	40	5	-0.456	0.000591	0.002
PC(18:0_24:1)	PC	42	1	0	1	1
PC(18:1_18:1)	PC	36	2	0.0914	0.278	0.417
PC(18:1_20:1)	PC	38	2	0.229	0.0341	0.0747
PC(18:1_20:5)	PC	38	6	-1.08	1.41e-06	1.01e-05
PC(18:1_22:5)	PC	40	6	-0.709	1.56e-05	7.48e-05
PC(18:1_22:6)	PC	40	7	-0.742	1.72e-05	8.14e-05
PC(18:2_22:6)	PC	40	8	-0.919	3.55e-05	0.000159
PC(18:3_20:5)	PC	38	8	-0.227	0.327	0.467
PC(18:3_22:6)	PC	40	9	-1.44	3.37e-06	2.05e-05
PC(18:3_24:1)	PC	42	4	-0.06	0.331	0.47
PC(18:4_22:6)	PC	40	10	-1.74	1.93e-08	6.31e-07
PC(19:0_22:2)	PC	41	2	0	1	1
PC(19:0_22:6)	PC	41	6	-0.936	0.000356	0.00126
PC(19:1_22:4)	PC	41	5	-0.499	0.00241	0.00716
PC(19:1_22:6)	PC	41	7	-0.00422	0.646	0.77
PC(20:0_22:5)	PC	42	5	0	1	1
PC(20:0_22:6)	PC	42	6	-1.09	6.35e-08	1.19e-06
PC(20:0_24:1)	PC	44	1	0	1	1
PC(20:1_22:2)	PC	42	3	0	1	1
PC(20:1_22:6)	PC	42	7	-0.652	0.000134	0.000526
PC(20:2_22:6)	PC	42	8	-0.483	0.00118	0.00376
PC(20:3_22:6)	PC	42	9	-1.06	3.51e-06	2.1e-05
PC(20:4_22:6)	PC	42	10	-1.52	1.4e-06	1.01e-05
PC(20:5_22:6)	PC	42	11	-1.8	1.79e-07	2.15e-06
PC(21:0_22:1)	PC	43	1	0	1	1
PC(21:0_22:2)	PC	43	2	0	1	1
PC(21:0_22:6)	PC	43	6	0	1	1
PC(22:0_22:2)	PC	44	2	0	1	1
PC(22:0_22:4)	PC	44	4	0	1	1
PC(22:0_22:6)	PC	44	6	0	1	1
PC(22:1_22:2)	PC	44	3	0	1	1
PC(22:1_22:4)	PC	44	5	0	1	1
PC(22:1_22:6)	PC	44	7	0	1	1
PC(22:2_22:6)	PC	44	8	0	1	1
PC(22:4_22:6)	PC	44	10	-0.752	8.97e-05	0.000369
PC(23:1_23:1)	PC	46	2	0	1	1
PC(O-14:0_15:0)	PC	29	0	-0.35	0.0178	0.043
PC(O-14:0_16:0)	PC	30	0	-0.416	0.00152	0.00473
PC(O-14:0_18:0)	PC	32	0	-0.426	0.00157	0.00485
PC(O-14:0_18:1)	PC	32	1	-0.37	0.00119	0.00376
PC(O-14:0_18:2)	PC	32	2	0.223	0.0263	0.0597
PC(O-14:0_18:3)	PC	32	3	0.248	0.0205	0.0485
PC(O-14:0_20:4)	PC	34	4	0.386	0.00248	0.00734
PC(O-14:0_22:0)	PC	36	0	-0.421	0.0198	0.0471
PC(O-15:0_20:4)	PC	35	4	-0.193	0.0622	0.122
PC(O-16:0_12:0)	PC	28	0	-0.202	0.117	0.209
PC(O-16:0_14:1)	PC	30	1	-0.189	0.302	0.445
PC(O-16:0_15:0)	PC	31	0	-0.0782	0.475	0.612
PC(O-16:0_15:1)	PC	31	1	-0.00588	0.946	1
PC(O-16:0_17:0)	PC	33	0	-0.312	0.014	0.0348
PC(O-16:0_17:1)	PC	33	1	-0.238	0.0439	0.0927
PC(O-16:0_18:0)	PC	34	0	-0.536	0.00131	0.00414
PC(O-16:0_18:1)	PC	34	1	-0.19	0.226	0.351
PC(O-16:0_18:2)	PC	34	2	-0.329	0.337	0.478
PC(O-16:0_18:3)	PC	34	3	0.529	0.000267	0.000993
PC(O-16:0_19:0)	PC	35	0	-0.345	0.0317	0.07
PC(O-16:0_20:3)	PC	36	3	-0.261	0.34	0.482
PC(O-16:0_20:4)	PC	36	4	-0.505	0.000478	0.00164
PC(O-16:0_20:5)	PC	36	5	-1.15	9.8e-07	7.47e-06
PC(O-16:0_22:0)	PC	38	0	0	1	1
PC(O-16:0_22:1)	PC	38	1	0.295	0.0165	0.0402
PC(O-16:0_22:4)	PC	38	4	-1.43	7.39e-07	5.9e-06
PC(O-16:0_22:5)	PC	38	5	-1.18	5.09e-07	4.75e-06
PC(O-16:0_22:6)	PC	38	6	-0.919	3.69e-06	2.17e-05
PC(O-17:0_20:4)	PC	37	4	-0.703	4.96e-05	0.000215
PC(O-18:0_17:2)	PC	35	2	0.491	0.000426	0.00148
PC(O-18:0_18:1)	PC	36	1	-0.0749	0.286	0.426
PC(O-18:0_22:1)	PC	40	1	0.272	0.0373	0.0808
PC(O-18:0_22:2)	PC	40	2	0.335	0.0108	0.0279
PC(O-18:0_22:4)	PC	40	4	-0.456	0.00553	0.0152
PC(O-18:0_22:5)	PC	40	5	-1.34	1.48e-06	1.04e-05
PC(O-18:0_22:6)	PC	40	6	-1.17	6.16e-07	5.31e-06
PC(O-18:1_18:1)	PC	36	2	-0.0175	0.846	0.942
PC(O-18:2_24:0)	PC	42	2	-0.0298	0.764	0.878
PC(O-20:0_20:3)	PC	40	3	-0.182	0.187	0.303
PC(O-20:0_22:4)	PC	42	4	-1.17	0.000111	0.000441
PC(O-20:0_22:6)	PC	42	6	-1.15	1.62e-05	7.74e-05
PC(O-22:1_22:3)	PC	44	4	0	1	1
PC(O-24:0_18:3)	PC	42	3	0.0995	0.413	0.554
PC(P-16:0_12:0)	PC	28	0	-0.17	0.142	0.243
PC(P-16:0_13:0)	PC	29	0	-0.0583	0.497	0.627
PC(P-16:0_14:0)	PC	30	0	-0.16	0.0979	0.18
PC(P-16:0_14:1)	PC	30	1	0.0855	0.403	0.543
PC(P-16:0_15:1)	PC	31	1	0.229	0.0338	0.0741
PC(P-16:0_16:0)	PC	32	0	0.226	0.0234	0.0536
PC(P-16:0_17:0)	PC	33	0	0.341	0.00612	0.0166
PC(P-16:0_17:1)	PC	33	1	0.466	0.000439	0.00152
PC(P-16:0_17:2)	PC	33	2	0.45	0.000358	0.00126
PC(P-16:0_18:1)	PC	34	1	0.425	0.00101	0.00325
PC(P-16:0_18:2)	PC	34	2	0.226	0.0222	0.0516
PC(P-16:0_18:3)	PC	34	3	-0.164	0.0686	0.132
PC(P-16:0_18:4)	PC	34	4	-1.15	1.4e-05	6.76e-05
PC(P-16:0_19:1)	PC	35	1	0.465	0.000375	0.00131
PC(P-16:0_20:3)	PC	36	3	-0.197	0.395	0.535
PC(P-16:0_20:4)	PC	36	4	-0.686	0.000944	0.00307
PC(P-16:0_20:5)	PC	36	5	-1.36	1.95e-07	2.23e-06
PC(P-16:0_22:4)	PC	38	4	-1.06	1.58e-06	1.09e-05
PC(P-16:0_22:6)	PC	38	6	-0.333	0.391	0.532
PC(P-18:0_17:2)	PC	35	2	0.524	5.5e-05	0.000235
PC(P-18:0_18:1)	PC	36	1	0.46	0.00236	0.00707
PC(P-18:0_20:5)	PC	38	5	-0.348	0.311	0.453
PC(P-18:0_22:4)	PC	40	4	-0.9	6.08e-06	3.28e-05
PC(P-18:0_22:6)	PC	40	6	-1.26	1.14e-07	1.64e-06
PC(P-18:1_18:1)	PC	36	2	-0.0175	0.797	0.903
PC(P-20:0_20:5)	PC	40	5	-0.785	1.25e-05	6.18e-05
PC(P-20:0_22:4)	PC	42	4	-1.21	5.91e-06	3.21e-05
PE(14:0_16:0)	PE	30	0	0.0201	0.871	0.966
PE(14:0_16:1)	PE	30	1	-0.264	0.296	0.438
PE(14:0_18:1)	PE	32	1	0.452	0.00237	0.00709
PE(14:0_20:4)	PE	34	4	-0.195	0.506	0.634
PE(15:0_16:0)	PE	31	0	-0.445	0.0643	0.125
PE(15:0_18:0)	PE	33	0	0.034	0.777	0.889
PE(15:0_18:1)	PE	33	1	-0.159	0.292	0.433
PE(16:0_16:0)	PE	32	0	0.0827	0.673	0.795
PE(16:0_17:0)	PE	33	0	0.0451	0.839	0.937
PE(16:0_18:0)	PE	34	0	-0.1	0.36	0.503
PE(16:0_18:1)	PE	34	1	0.322	0.00274	0.008
PE(16:0_18:2)	PE	34	2	0.483	0.000983	0.00318
PE(16:0_18:3)	PE	34	3	-0.153	0.18	0.294
PE(16:0_20:4)	PE	36	4	-0.866	2.04e-05	9.41e-05
PE(16:0_20:5)	PE	36	5	-0.964	4.05e-06	2.35e-05
PE(16:1_16:1)	PE	32	2	-0.344	0.0957	0.176
PE(16:1_17:0)	PE	33	1	-0.21	0.152	0.255
PE(16:1_17:1)	PE	33	2	-0.119	0.328	0.467
PE(16:1_18:2)	PE	34	3	-0.13	0.228	0.354
PE(16:1_20:5)	PE	36	6	-0.403	0.357	0.501
PE(17:0_18:0)	PE	35	0	0.283	0.515	0.643
PE(17:0_18:1)	PE	35	1	0.216	0.0309	0.0684
PE(17:0_18:3)	PE	35	3	-0.128	0.0858	0.16
PE(17:0_20:3)	PE	37	3	-0.0941	0.222	0.346
PE(17:0_20:4)	PE	37	4	0.0269	0.729	0.848
PE(17:0_20:5)	PE	37	5	-1.11	6.44e-07	5.41e-06
PE(17:1_18:1)	PE	35	2	0.0864	0.733	0.851
PE(17:1_18:2)	PE	35	3	-0.0296	0.77	0.883
PE(18:0_18:1)	PE	36	1	0.179	0.0767	0.145
PE(18:0_19:1)	PE	37	1	0.312	0.469	0.606
PE(18:0_20:1)	PE	38	1	0.485	0.432	0.57
PE(18:0_20:2)	PE	38	2	0.406	0.00291	0.00847
PE(18:0_20:3)	PE	38	3	-0.0284	0.773	0.886
PE(18:0_20:4)	PE	38	4	-1.05	6.94e-07	5.68e-06
PE(18:0_20:5)	PE	38	5	-1.02	1.61e-06	1.1e-05
PE(18:0_22:2)	PE	40	2	-0.383	0.457	0.592
PE(18:0_22:4)	PE	40	4	0.26	0.454	0.592
PE(18:0_24:1)	PE	42	1	-0.436	0.024	0.0548
PE(18:1_18:1)	PE	36	2	0.466	0.000339	0.00121
PE(18:1_18:2)	PE	36	3	0.68	9.92e-05	0.000399
PE(18:1_19:0)	PE	37	1	0.5	0.456	0.592
PE(18:1_19:1)	PE	37	2	0.283	0.517	0.643
PE(18:1_20:1)	PE	38	2	0.471	0.00472	0.0132
PE(18:1_20:5)	PE	38	6	-0.762	1.03e-05	5.18e-05
PE(18:1_22:0)	PE	40	1	0.0741	0.751	0.866
PE(18:1_22:2)	PE	40	3	0.462	0.449	0.589
PE(18:1_22:4)	PE	40	5	-0.408	0.000684	0.00229
PE(18:1_22:6)	PE	40	7	0.298	0.179	0.293
PE(18:2_20:5)	PE	38	7	0.0111	0.936	1
PE(18:2_22:4)	PE	40	6	-0.167	0.16	0.266
PE(19:1_20:1)	PE	39	2	0.508	0.42	0.562
PE(20:0_22:6)	PE	42	6	-0.349	0.0269	0.0609
PE(20:3_20:5)	PE	40	8	0.471	0.0367	0.0799
PE(20:4_22:0)	PE	42	4	0.0798	0.62	0.745
PE(O-16:0_16:0)	PE	32	0	0.202	0.488	0.623
PE(O-18:0_16:0)	PE	34	0	0.306	0.492	0.627
PE(O-18:0_20:4)	PE	38	4	1.08	0.576	0.704
PE(O-20:0_22:4)	PE	42	4	0.309	0.438	0.577
PE(P-16:0_14:0)	PE	30	0	0	1	1
PE(P-16:0_16:0)	PE	32	0	0.283	0.0861	0.16
PE(P-16:0_16:1)	PE	32	1	1.2	3.89e-07	3.79e-06
PE(P-16:0_17:1)	PE	33	1	-0.238	0.0127	0.0319
PE(P-16:0_18:1)	PE	34	1	1.14	4.38e-07	4.2e-06
PE(P-16:0_18:2)	PE	34	2	1.68	4.28e-09	2.84e-07
PE(P-16:0_18:3)	PE	34	3	1.58	4.51e-07	4.27e-06
PE(P-16:0_20:3)	PE	36	3	1.16	1.28e-06	9.63e-06
PE(P-16:0_20:4)	PE	36	4	-0.717	7.99e-05	0.000333
PE(P-16:0_20:5)	PE	36	5	-0.733	0.000126	0.000498
PE(P-16:0_22:4)	PE	38	4	0.724	3.5e-05	0.000158
PE(P-16:0_22:6)	PE	38	6	-1.25	2.28e-07	2.44e-06
PE(P-18:0_16:0)	PE	34	0	-0.0741	0.562	0.689
PE(P-18:0_18:1)	PE	36	1	0.953	5.71e-06	3.16e-05
PE(P-18:0_18:2)	PE	36	2	1.48	3.44e-08	8.77e-07
PE(P-18:0_18:3)	PE	36	3	1.34	1.99e-07	2.24e-06
PE(P-18:0_20:1)	PE	38	1	0.881	5.02e-05	0.000216
PE(P-18:0_20:2)	PE	38	2	0.395	0.426	0.566
PE(P-18:0_20:3)	PE	38	3	0.703	9.1e-05	0.000371
PE(P-18:0_20:4)	PE	38	4	-0.848	7.09e-06	3.73e-05
PE(P-18:0_20:5)	PE	38	5	-0.833	4.28e-06	2.47e-05
PE(P-18:0_22:2)	PE	40	2	1.6	1.54e-06	1.08e-05
PE(P-18:0_22:4)	PE	40	4	-0.091	0.409	0.549
PE(P-18:0_22:6)	PE	40	6	-1.43	6.88e-08	1.19e-06
PE(P-18:1_22:6)	PE	40	7	-1.11	2.84e-06	1.77e-05
PE(P-20:0_16:0)	PE	36	0	0.553	0.402	0.543
PE(P-20:0_20:4)	PE	40	4	-1.04	6.99e-06	3.73e-05
PE(P-20:0_22:4)	PE	42	4	0.0661	0.718	0.836
PE(P-20:0_22:6)	PE	42	6	-0.23	0.254	0.385
PG(16:0_16:1)	PG	32	1	-0.233	0.145	0.246
PG(16:0_18:2)	PG	34	2	-0.044	0.608	0.737
PG(16:1_18:1)	PG	34	2	-0.000916	0.994	1
PG(18:0_18:2)	PG	36	2	0.638	0.125	0.221
PG(18:0_20:4)	PG	38	4	-0.0227	0.911	1
PG(18:1_16:0)	PG	34	1	-0.0467	0.367	0.51
PG(18:1_17:0)	PG	35	1	0.00532	0.94	1
PG(18:1_18:0)	PG	36	1	0.261	0.365	0.508
PG(18:1_18:1)	PG	36	2	0.067	0.821	0.923
PG(18:1_18:2)	PG	36	3	0.0507	0.861	0.958
PG(18:1_18:3)	PG	36	4	0.0742	0.797	0.903
PG(18:1_20:3)	PG	38	4	0.366	0.523	0.649
PG(18:1_20:4)	PG	38	5	0.317	0.493	0.627
PG(18:1_20:5)	PG	38	6	0	1	1
PG(18:1_22:6)	PG	40	7	0.196	0.37	0.513
PG(18:2_18:2)	PG	36	4	-0.218	0.324	0.467
PG(18:2_18:3)	PG	36	5	0	1	1
PG(18:2_20:4)	PG	38	6	0	1	1
PG(18:3_22:6)	PG	40	9	0	1	1
PG(20:3_22:6)	PG	42	9	0	1	1
PG(20:4_22:6)	PG	42	10	0	1	1
PG(20:5_22:6)	PG	42	11	0	1	1
PG(22:6_22:6)	PG	44	12	-0.547	0.125	0.221
PI(14:0_18:1)	PI	32	1	-0.642	0.136	0.235
PI(16:0_16:0)	PI	32	0	-0.407	0.129	0.226
PI(16:0_16:1)	PI	32	1	-0.752	0.0733	0.14
PI(16:0_18:0)	PI	34	0	-0.133	0.175	0.288
PI(16:0_18:1)	PI	34	1	-0.315	0.0687	0.132
PI(16:0_20:3)	PI	36	3	-0.432	0.0597	0.119
PI(16:0_20:4)	PI	36	4	-0.392	0.186	0.302
PI(16:0_20:5)	PI	36	5	-0.338	0.421	0.562
PI(16:0_22:6)	PI	38	6	-0.18	0.547	0.673
PI(16:1_18:1)	PI	34	2	-0.385	0.0689	0.132
PI(17:0_18:1)	PI	35	1	-0.26	0.0622	0.122
PI(17:0_20:4)	PI	37	4	-0.383	0.0489	0.0999
PI(17:1_18:0)	PI	35	1	0	1	1
PI(17:1_18:1)	PI	35	2	-0.27	0.128	0.226
PI(18:0_18:1)	PI	36	1	-0.0942	0.306	0.45
PI(18:0_18:2)	PI	36	2	-0.162	0.144	0.246
PI(18:0_18:3)	PI	36	3	-0.198	0.0636	0.124
PI(18:0_19:1)	PI	37	1	0.0339	0.867	0.963
PI(18:0_20:1)	PI	38	1	0.281	0.524	0.649
PI(18:0_20:2)	PI	38	2	0.223	0.598	0.728
PI(18:0_20:3)	PI	38	3	-0.214	0.00843	0.0223
PI(18:0_20:4)	PI	38	4	-0.0396	0.702	0.821
PI(18:0_20:5)	PI	38	5	0.0398	0.322	0.466
PI(18:0_22:1)	PI	40	1	0.269	0.614	0.742
PI(18:0_22:2)	PI	40	2	0.45	0.5	0.627
PI(18:0_22:4)	PI	40	4	0.228	0.282	0.423
PI(18:0_22:6)	PI	40	6	0.127	0.426	0.566
PI(18:1_18:2)	PI	36	3	-0.299	0.0217	0.0509
PI(18:1_19:1)	PI	37	2	0.00195	0.993	1
PI(18:1_20:1)	PI	38	2	0.217	0.626	0.75
PI(18:1_20:3)	PI	38	4	-0.336	0.00228	0.00687
PI(18:1_20:4)	PI	38	5	0.0378	0.705	0.823
PI(18:1_20:5)	PI	38	6	0.0521	0.429	0.569
PI(18:1_22:2)	PI	40	3	0.00415	0.987	1
PI(20:1_20:4)	PI	40	5	0.113	0.581	0.708
PS(16:0_16:1)	PS	32	1	-0.785	0.326	0.467
PS(16:0_18:1)	PS	34	1	-0.557	0.155	0.26
PS(16:0_18:2)	PS	34	2	-0.72	0.326	0.467
PS(18:0_18:1)	PS	36	1	-0.191	0.0446	0.0935
PS(18:0_18:2)	PS	36	2	-0.364	0.0615	0.122
PS(18:0_18:3)	PS	36	3	-0.719	0.246	0.376
PS(18:0_22:6)	PS	40	6	-0.151	0.498	0.627
SM 32:0	SM	32	0	-0.181	0.212	0.334
SM 32:1	SM	32	1	-0.16	0.211	0.333
SM 33:0	SM	33	0	-0.227	0.0633	0.124
SM 33:1	SM	33	1	-0.138	0.288	0.427
SM 33:2	SM	33	2	-0.1	0.261	0.394
SM 34:0	SM	34	0	-0.131	0.19	0.306
SM 34:1	SM	34	1	-0.146	0.134	0.232
SM 35:0	SM	35	0	-0.195	0.0554	0.111
SM 35:1	SM	35	1	-0.246	0.0429	0.0908
SM 36:0	SM	36	0	-0.121	0.165	0.273
SM 36:1	SM	36	1	-0.241	0.0309	0.0684
SM 36:2	SM	36	2	-0.0785	0.378	0.521
SM 38:0	SM	38	0	-0.297	0.0185	0.0444
SM 38:2	SM	38	2	-0.176	0.314	0.456
SM 40:0	SM	40	0	-0.186	0.157	0.263
SM 40:1	SM	40	1	-0.235	0.0828	0.155
SM 40:2	SM	40	2	-0.118	0.286	0.426
SM 41:1	SM	41	1	-0.191	0.133	0.231
SM 41:2	SM	41	2	-0.0506	0.697	0.818
SM 42:1	SM	42	1	-0.242	0.0732	0.14
SM 42:2	SM	42	2	-0.0391	0.741	0.859
SM 43:1	SM	43	1	-0.326	0.0325	0.0716
SM 43:2	SM	43	2	-0.131	0.312	0.454
SM 44:0	SM	44	0	-0.381	0.0157	0.0383
SM 44:2	SM	44	2	-0.183	0.283	0.424
TG(12:0_12:0_14:0)	TG	38	0	0.0119	0.892	0.984
TG(12:0_12:0_16:0)	TG	40	0	-0.0188	0.744	0.86
TG(12:0_14:0_15:0)	TG	41	0	-0.048	0.526	0.65
TG(12:0_14:0_16:0)	TG	42	0	0.00263	0.973	1
TG(12:0_14:0_16:1)	TG	42	1	-0.0858	0.284	0.424
TG(12:0_14:0_18:1)	TG	44	1	0.049	0.563	0.689
TG(12:0_14:1_16:1)	TG	42	2	-0.14	0.171	0.281
TG(12:0_15:0_18:1)	TG	45	1	0.142	0.197	0.315
TG(12:0_16:0_17:0)	TG	45	0	0.277	0.0114	0.0291
TG(12:0_16:0_20:5)	TG	48	5	-1.3	5.19e-07	4.77e-06
TG(13:0_14:0_16:0)	TG	43	0	0.0508	0.499	0.627
TG(14:0_14:0_16:0)	TG	44	0	0.0957	0.269	0.406
TG(14:0_14:0_17:0)	TG	45	0	0.224	0.0143	0.0356
TG(14:0_14:1_15:0)	TG	43	1	-0.054	0.616	0.743
TG(14:0_14:1_18:2)	TG	46	3	-0.227	0.0305	0.0683
TG(14:0_15:0_16:0)	TG	45	0	0.277	0.0464	0.096
TG(14:0_15:0_16:1)	TG	45	1	0.0812	0.387	0.528
TG(14:0_15:0_20:5)	TG	49	5	-0.864	1.34e-05	6.53e-05
TG(14:0_15:0_22:5)	TG	51	5	-0.763	2.29e-05	0.000105
TG(14:0_16:0_16:1)	TG	46	1	0.19	0.0415	0.0888
TG(14:0_16:0_18:1)	TG	48	1	0.288	0.00636	0.0172
TG(14:0_16:0_20:4)	TG	50	4	-0.512	0.000825	0.00271
TG(14:0_16:1_17:0)	TG	47	1	0.366	0.000747	0.00248
TG(14:0_16:1_17:1)	TG	47	2	0.0945	0.341	0.482
TG(14:0_16:1_18:1)	TG	48	2	0.199	0.0222	0.0516
TG(14:0_16:1_18:3)	TG	48	4	-0.425	0.00176	0.00541
TG(14:0_16:1_20:5)	TG	50	6	-1.4	3.25e-07	3.27e-06
TG(14:0_17:0_18:0)	TG	49	0	0.101	0.345	0.486
TG(14:0_17:0_18:1)	TG	49	1	0.365	0.00603	0.0165
TG(14:0_18:1_18:3)	TG	50	4	-0.166	0.106	0.192
TG(14:0_18:2_20:4)	TG	52	6	-0.646	3.77e-05	0.000168
TG(14:1_15:0_16:1)	TG	45	2	-0.0763	0.484	0.623
TG(14:1_15:0_18:2)	TG	47	3	-0.187	0.0802	0.151
TG(14:1_16:0_16:1)	TG	46	2	0.0349	0.679	0.8
TG(14:1_16:0_18:2)	TG	48	3	-0.113	0.24	0.369
TG(14:1_18:0_18:4)	TG	50	5	-0.515	0.000311	0.00113
TG(15:0_15:0_16:0)	TG	46	0	0.216	0.0307	0.0684
TG(15:0_15:0_17:0)	TG	47	0	0.253	0.0417	0.0889
TG(15:0_16:0_16:0)	TG	47	0	0.329	0.00177	0.00542
TG(15:0_16:0_16:1)	TG	47	1	0.303	0.00544	0.015
TG(15:0_16:0_17:0)	TG	48	0	0.436	0.00056	0.0019
TG(15:0_16:0_18:1)	TG	49	1	0.338	0.00067	0.00226
TG(15:0_16:0_22:5)	TG	53	5	-0.591	0.000232	0.000872
TG(15:0_16:1_18:1)	TG	49	2	0.295	0.00299	0.00865
TG(15:0_16:1_18:2)	TG	49	3	0.0279	0.744	0.86
TG(15:0_16:1_18:3)	TG	49	4	-0.267	0.0155	0.0381
TG(15:0_16:1_20:5)	TG	51	6	-1.33	2.45e-07	2.57e-06
TG(15:0_17:0_18:0)	TG	50	0	0.0725	0.497	0.627
TG(15:0_17:0_19:1)	TG	51	1	0.136	0.246	0.376
TG(15:0_18:1_18:3)	TG	51	4	-0.149	0.121	0.215
TG(15:0_18:1_22:5)	TG	55	6	-1.06	6.13e-07	5.31e-06
TG(15:0_18:2_20:5)	TG	53	7	-1.52	1.79e-07	2.15e-06
TG(15:0_18:2_22:5)	TG	55	7	-1.49	1.71e-07	2.14e-06
TG(16:0_16:0_16:0)	TG	48	0	0.133	0.195	0.313
TG(16:0_16:0_17:0)	TG	49	0	0.213	0.025	0.0569
TG(16:0_16:0_18:1)	TG	50	1	0.208	0.0234	0.0536
TG(16:0_16:1_18:1)	TG	50	2	0.289	0.00485	0.0135
TG(16:0_16:1_18:2)	TG	50	3	0.121	0.129	0.226
TG(16:0_16:1_20:5)	TG	52	6	-1.48	6.36e-07	5.41e-06
TG(16:0_17:0_18:0)	TG	51	0	0.132	0.239	0.369
TG(16:0_17:0_18:1)	TG	51	1	0.215	0.016	0.039
TG(16:0_17:0_19:0)	TG	52	0	0.179	0.138	0.236
TG(16:0_17:0_22:5)	TG	55	5	-0.717	1.34e-05	6.53e-05
TG(16:0_17:1_18:0)	TG	51	1	0.255	0.01	0.026
TG(16:0_17:1_18:1)	TG	51	2	0.284	0.00271	0.00797
TG(16:0_17:1_22:6)	TG	55	7	-1.89	4.58e-08	1.05e-06
TG(16:0_18:0_18:0)	TG	52	0	-0.0203	0.885	0.977
TG(16:0_18:0_18:1)	TG	52	1	0.0952	0.252	0.382
TG(16:0_18:0_19:0)	TG	53	0	0.0866	0.516	0.643
TG(16:0_18:0_20:4)	TG	54	4	-0.168	0.0461	0.0959
TG(16:0_18:0_21:0)	TG	55	0	-0.0209	0.876	0.97
TG(16:0_18:0_22:0)	TG	56	0	0.0317	0.819	0.922
TG(16:0_18:0_22:5)	TG	56	5	-1.31	2.91e-08	8.04e-07
TG(16:0_18:1_18:1)	TG	52	2	0.144	0.0723	0.138
TG(16:0_18:1_18:2)	TG	52	3	0.139	0.0996	0.182
TG(16:0_18:1_18:3)	TG	52	4	-0.0815	0.307	0.45
TG(16:0_18:1_22:5)	TG	56	6	-1.02	5.78e-07	5.11e-06
TG(16:0_18:2_22:5)	TG	56	7	-1.25	1.82e-07	2.15e-06
TG(16:0_20:2_20:3)	TG	56	5	-0.578	0.000335	0.0012
TG(16:0_20:4_20:5)	TG	56	9	-1.33	2.11e-06	1.36e-05
TG(16:0_20:4_22:6)	TG	58	10	-1.77	1.33e-07	1.76e-06
TG(16:0_20:5_22:5)	TG	58	10	-1.73	9.91e-08	1.49e-06
TG(16:0_22:5_22:6)	TG	60	11	-2.28	1.42e-08	5.23e-07
TG(16:1_17:1_18:1)	TG	51	3	0.171	0.0485	0.0992
TG(16:1_18:0_18:4)	TG	52	5	-0.646	8.7e-05	0.000361
TG(16:1_18:0_20:4)	TG	54	5	-0.601	4.64e-05	0.000204
TG(16:1_18:1_19:1)	TG	53	3	0.292	0.000176	0.000675
TG(16:1_18:1_20:4)	TG	54	6	-1.13	5.35e-07	4.79e-06
TG(16:1_18:1_20:5)	TG	54	7	-1.49	1.27e-07	1.72e-06
TG(16:1_18:1_22:6)	TG	56	8	-1.58	7.71e-08	1.25e-06
TG(16:1_20:5_22:5)	TG	58	11	-1.8	1.62e-07	2.06e-06
TG(17:0_17:0_18:1)	TG	52	1	0.299	0.00673	0.0181
TG(17:0_17:1_19:1)	TG	53	2	0.0934	0.372	0.514
TG(17:0_18:0_18:1)	TG	53	1	0.179	0.0653	0.127
TG(17:0_18:0_22:5)	TG	57	5	-1.07	2.32e-06	1.48e-05
TG(17:0_18:1_18:1)	TG	53	2	0.184	0.0461	0.0959
TG(17:0_18:1_18:2)	TG	53	3	-0.00514	0.954	1
TG(17:0_18:1_20:0)	TG	55	1	0.201	0.0601	0.119
TG(17:0_18:1_20:5)	TG	55	6	-1.81	7e-08	1.19e-06
TG(17:0_18:1_22:1)	TG	57	2	0.169	0.0689	0.132
TG(17:0_18:1_22:5)	TG	57	6	-1.24	2.26e-07	2.44e-06
TG(17:0_20:3_22:5)	TG	59	8	-1.6	5.97e-08	1.19e-06
TG(17:0_20:5_22:5)	TG	59	10	-1.84	3.96e-08	9.38e-07
TG(17:1_18:0_18:2)	TG	53	3	0.162	0.126	0.223
TG(17:1_18:0_18:3)	TG	53	4	-0.0388	0.674	0.795
TG(17:1_18:1_18:2)	TG	53	4	-0.0884	0.308	0.45
TG(17:1_18:1_18:3)	TG	53	5	-0.33	0.00133	0.00418
TG(17:1_18:1_22:5)	TG	57	7	-1.34	5.4e-08	1.12e-06
TG(17:1_18:1_22:6)	TG	57	8	-2.04	9.49e-09	3.93e-07
TG(17:1_18:2_18:3)	TG	53	6	-1.23	5.28e-07	4.79e-06
TG(17:1_18:2_22:5)	TG	57	8	-1.21	7.24e-07	5.86e-06
TG(18:0_18:0_18:0)	TG	54	0	-0.068	0.653	0.777
TG(18:0_18:0_18:1)	TG	54	1	0.0782	0.379	0.522
TG(18:0_18:0_22:5)	TG	58	5	-1.28	2.1e-07	2.32e-06
TG(18:0_18:1_18:1)	TG	54	2	0.0395	0.628	0.752
TG(18:0_18:1_18:2)	TG	54	3	-0.103	0.148	0.25
TG(18:0_18:1_19:1)	TG	55	2	0.155	0.0757	0.144
TG(18:0_18:1_20:0)	TG	56	1	0.158	0.11	0.199
TG(18:0_18:1_20:1)	TG	56	2	0.247	0.0144	0.0356
TG(18:0_18:1_20:2)	TG	56	3	0.11	0.221	0.346
TG(18:0_18:1_20:3)	TG	56	4	-0.0276	0.817	0.921
TG(18:0_18:1_20:5)	TG	56	6	-1.66	2.03e-09	2.69e-07
TG(18:0_18:1_21:0)	TG	57	1	0.172	0.0848	0.159
TG(18:0_18:1_22:0)	TG	58	1	0.144	0.149	0.251
TG(18:0_18:1_22:1)	TG	58	2	0.241	0.0221	0.0516
TG(18:0_18:1_22:5)	TG	58	6	-1.53	2.87e-09	2.7e-07
TG(18:0_18:1_22:6)	TG	58	7	-2.27	4.68e-10	1.64e-07
TG(18:0_18:2_20:1)	TG	56	3	-0.0784	0.397	0.538
TG(18:0_18:2_20:5)	TG	56	7	-2.05	6.86e-09	3.5e-07
TG(18:0_18:2_22:4)	TG	58	6	-0.991	2.6e-06	1.64e-05
TG(18:0_18:2_22:5)	TG	58	7	-1.42	2.27e-08	6.83e-07
TG(18:0_20:0_20:1)	TG	58	1	0.362	0.0188	0.0451
TG(18:0_20:1_20:3)	TG	58	4	-0.225	0.13	0.227
TG(18:0_20:1_22:5)	TG	60	6	-1.44	5.42e-08	1.12e-06
TG(18:0_20:3_22:4)	TG	60	7	-1.41	6.68e-08	1.19e-06
TG(18:0_20:3_22:5)	TG	60	8	-1.56	3.9e-08	9.38e-07
TG(18:0_20:4_22:5)	TG	60	9	-1.61	2.84e-07	2.89e-06
TG(18:0_20:5_22:5)	TG	60	10	-1.98	9.21e-09	3.93e-07
TG(18:0_22:1_22:5)	TG	62	6	-1.31	6.16e-08	1.19e-06
TG(18:0_22:3_22:5)	TG	62	8	-1.67	6.71e-07	5.56e-06
TG(18:0_22:4_22:5)	TG	62	9	-1.62	3.52e-07	3.49e-06
TG(18:0_22:5_22:5)	TG	62	10	-2	1.34e-08	5.23e-07
TG(18:1_18:1_18:1)	TG	54	3	0.218	0.0792	0.15
TG(18:1_18:1_20:1)	TG	56	3	0.244	0.00698	0.0187
TG(18:1_18:1_20:2)	TG	56	4	-0.422	0.000723	0.00241
TG(18:1_18:1_22:4)	TG	58	6	-1.44	9.67e-06	4.89e-05
TG(18:1_18:1_22:5)	TG	58	7	-1.38	1.95e-07	2.23e-06
TG(18:1_18:1_22:6)	TG	58	8	-1.86	4.82e-09	2.9e-07
TG(18:1_18:2_19:0)	TG	55	3	0.0678	0.431	0.57
TG(18:1_18:2_19:1)	TG	55	4	-0.262	0.00744	0.0198
TG(18:1_18:2_20:2)	TG	56	5	-0.42	0.00166	0.00512
TG(18:1_18:2_22:6)	TG	58	9	-1.36	1.39e-06	1.01e-05
TG(18:1_18:3_22:5)	TG	58	9	-1.57	1.46e-07	1.9e-06
TG(18:1_19:0_22:1)	TG	59	2	0.199	0.0377	0.0815
TG(18:1_19:0_22:5)	TG	59	6	-1.24	1.26e-07	1.72e-06
TG(18:1_19:1_20:0)	TG	57	2	0.207	0.042	0.0893
TG(18:1_19:1_20:1)	TG	57	3	0.136	0.0941	0.174
TG(18:1_19:1_20:2)	TG	57	4	-0.13	0.308	0.45
TG(18:1_19:1_20:3)	TG	57	5	-0.783	0.00497	0.0138
TG(18:1_19:1_22:1)	TG	59	3	0.131	0.209	0.332
TG(18:1_19:1_22:2)	TG	59	4	-0.634	0.0015	0.00469
TG(18:1_19:1_22:4)	TG	59	6	-1.37	6.62e-08	1.19e-06
TG(18:1_19:1_22:5)	TG	59	7	-1.36	1.09e-07	1.6e-06
TG(18:1_20:1_20:1)	TG	58	3	0.22	0.0294	0.066
TG(18:1_20:1_20:2)	TG	58	4	-0.735	0.00378	0.0107
TG(18:1_20:1_20:3)	TG	58	5	-0.557	6.03e-05	0.000255
TG(18:1_20:1_22:0)	TG	60	2	0.374	0.00608	0.0166
TG(18:1_20:1_22:1)	TG	60	3	0.241	0.0121	0.0305
TG(18:1_20:1_22:3)	TG	60	5	-0.56	9.12e-05	0.000371
TG(18:1_20:1_22:4)	TG	60	6	-0.819	1.9e-05	8.92e-05
TG(18:1_20:1_22:5)	TG	60	7	-1.21	0.000271	0.00101
TG(18:1_20:2_20:2)	TG	58	5	-0.946	7.82e-06	4.05e-05
TG(18:1_20:2_22:1)	TG	60	4	-0.0603	0.466	0.603
TG(18:1_20:2_22:4)	TG	60	7	-1.28	1.9e-06	1.25e-05
TG(18:1_20:3_20:4)	TG	58	8	-1.16	7.92e-07	6.25e-06
TG(18:1_20:3_22:4)	TG	60	8	-1.34	9.15e-08	1.42e-06
TG(18:1_20:3_22:5)	TG	60	9	-1.69	2.74e-08	7.89e-07
TG(18:1_20:3_22:6)	TG	60	10	-1.71	5.41e-09	2.99e-07
TG(18:1_20:5_22:5)	TG	60	11	-1.96	2e-08	6.31e-07
TG(18:1_22:1_22:1)	TG	62	3	0.258	0.012	0.0305
TG(18:1_22:1_22:5)	TG	62	7	-1.29	3.56e-09	2.7e-07
TG(18:1_22:3_22:5)	TG	62	9	-1.61	3.27e-08	8.67e-07
TG(18:1_22:4_22:5)	TG	62	10	-1.71	9.19e-08	1.42e-06
TG(18:1_22:5_22:5)	TG	62	11	-2.07	9.41e-10	1.64e-07
TG(18:1_22:5_22:6)	TG	62	12	-2.58	3.44e-09	2.7e-07
TG(18:2_19:1_22:1)	TG	59	4	-0.245	0.0398	0.0856
TG(18:2_20:2_22:5)	TG	60	9	-1.3	1.85e-06	1.24e-05
TG(18:2_20:3_22:5)	TG	60	10	-1.89	1.21e-07	1.71e-06
TG(18:2_20:5_22:5)	TG	60	12	-1.95	2.62e-07	2.71e-06
TG(18:2_22:5_22:6)	TG	62	13	-1.86	7.32e-08	1.21e-06
TG(20:1_20:1_20:4)	TG	60	6	-0.635	0.0271	0.0611
TG(20:1_20:1_22:5)	TG	62	7	-1.05	9.88e-10	1.64e-07
TG(20:1_20:2_22:5)	TG	62	8	-1.58	9.16e-09	3.93e-07
TG(20:1_20:3_22:1)	TG	62	5	-0.611	0.000146	0.000566
TG(20:1_20:4_22:1)	TG	62	6	-0.637	1.96e-05	9.17e-05
TG(20:1_22:0_22:2)	TG	64	3	0.869	0.326	0.467
TG(20:1_22:1_22:2)	TG	64	4	0	1	1
TG(20:1_22:1_22:5)	TG	64	7	-1.33	3.66e-09	2.7e-07
TG(20:1_22:2_22:5)	TG	64	8	0	1	1
TG(20:1_22:3_22:5)	TG	64	9	0	1	1
TG(20:2_22:2_22:4)	TG	64	8	0	1	1
TG(20:2_22:3_22:5)	TG	64	10	-0.0922	0.107	0.193
TG(20:2_22:5_22:5)	TG	64	12	-1.87	5.87e-10	1.64e-07
TG(20:3_20:5_22:6)	TG	62	14	-1.66	8.08e-07	6.3e-06
TG(20:3_22:3_22:5)	TG	64	11	-1.24	1.88e-08	6.31e-07

## Sheet: K562_Differential analysis
Supplementary Table S4D: Differential analysis output by LipidSuite of K562 cells.
Molecule	Class	total_chain_length	total_unsaturation	logFC	P.Value	adj.P.Val
CE(16:1)	CE	16	1	-0.0398	0.784	0.96
CE(18:1)	CE	18	1	0.0431	0.666	0.878
CE(18:2)	CE	18	2	-0.138	0.473	0.71
CE(18:3)	CE	18	3	-0.136	0.369	0.634
CE(20:4)	CE	20	4	-0.338	0.0199	0.25
CE(20:5)	CE	20	5	-0.0481	0.763	0.948
CE(22:5)	CE	22	5	-0.104	0.578	0.806
CE(22:6)	CE	22	6	-0.0346	0.838	1
Cer(d16:2_24:0)	Cer	40	2	0.0959	0.457	0.695
Cer(d18:0_16:0)	Cer	34	0	0.227	0.298	0.601
Cer(d18:0_17:0)	Cer	35	0	0	1	1
Cer(d18:0_18:0)	Cer	36	0	0.159	0.328	0.608
Cer(d18:0_20:0)	Cer	38	0	0.0516	0.588	0.811
Cer(d18:0_22:0)	Cer	40	0	0.146	0.489	0.721
Cer(d18:0_23:0)	Cer	41	0	0	1	1
Cer(d18:0_24:0)	Cer	42	0	0.132	0.549	0.773
Cer(d18:1_16:0)	Cer	34	1	0.0871	0.157	0.506
Cer(d18:1_17:0)	Cer	35	1	-0.0195	0.345	0.612
Cer(d18:1_18:0)	Cer	36	1	0.123	0.0448	0.377
Cer(d18:1_19:0)	Cer	37	1	0	1	1
Cer(d18:1_20:0)	Cer	38	1	0.0983	0.315	0.608
Cer(d18:1_22:0)	Cer	40	1	0.109	0.238	0.565
Cer(d18:1_23:0)	Cer	41	1	0.0563	0.56	0.784
Cer(d18:1_24:0)	Cer	42	1	0.208	0.0707	0.454
Cer(d18:1_24:1)	Cer	42	2	0.161	0.0952	0.462
Cer(d18:1_26:0)	Cer	44	1	0	1	1
Cer(d18:1_26:1)	Cer	44	2	0.206	0.0954	0.462
Cer(d18:2_16:0)	Cer	34	2	0.0404	0.713	0.918
Cer(d18:2_18:0)	Cer	36	2	0	1	1
Cer(d18:2_20:0)	Cer	38	2	0	1	1
Cer(d18:2_22:0)	Cer	40	2	0.0809	0.45	0.694
Cer(d18:2_23:0)	Cer	41	2	0	1	1
Cer(d18:2_24:0)	Cer	42	2	0.125	0.286	0.587
Cer(d18:2_26:0)	Cer	44	2	0	1	1
DG(14:0_16:0)	DG	30	0	0.0821	0.673	0.883
DG(14:0_18:1)	DG	32	1	0.279	0.0106	0.152
DG(16:0_16:0)	DG	32	0	0.28	0.0194	0.25
DG(16:0_17:0)	DG	33	0	0.332	0.00848	0.135
DG(16:0_17:1)	DG	33	1	0.27	0.0374	0.349
DG(16:0_18:0)	DG	34	0	0.297	0.0278	0.298
DG(16:0_18:1)	DG	34	1	0.165	0.0491	0.392
DG(16:0_18:2)	DG	34	2	0.126	0.0326	0.322
DG(16:0_20:1)	DG	36	1	0.23	0.0637	0.439
DG(16:0_20:3)	DG	36	3	0.178	0.102	0.475
DG(16:0_20:4)	DG	36	4	-0.997	0.0813	0.459
DG(16:0_22:1)	DG	38	1	0.286	0.0217	0.257
DG(16:0_22:6)	DG	38	6	-0.0198	0.829	1
DG(17:0_18:1)	DG	35	1	0.259	0.0712	0.454
DG(17:0_22:5)	DG	39	5	-0.0156	0.973	1
DG(17:1_18:0)	DG	35	1	0.295	0.0224	0.26
DG(18:0_18:0)	DG	36	0	0.306	0.0322	0.322
DG(18:0_18:2)	DG	36	2	0.206	0.08	0.459
DG(18:0_18:3)	DG	36	3	0.0499	0.538	0.767
DG(18:0_20:3)	DG	38	3	0.189	0.126	0.492
DG(18:0_20:4)	DG	38	4	0.157	0.174	0.521
DG(18:0_22:4)	DG	40	4	0.132	0.348	0.613
DG(18:1_18:1)	DG	36	2	0.182	0.0367	0.348
DG(18:1_18:2)	DG	36	3	0.0606	0.417	0.675
DG(18:1_18:3)	DG	36	4	-0.0164	0.845	1
DG(18:1_19:0)	DG	37	1	0.353	0.0179	0.238
DG(18:1_20:1)	DG	38	2	0.245	0.0322	0.322
DG(18:1_20:4)	DG	38	5	-0.167	0.114	0.492
DG(18:1_22:4)	DG	40	5	0.126	0.518	0.752
DG(18:1_22:5)	DG	40	6	0.109	0.423	0.676
DG(18:2_18:2)	DG	36	4	0.0164	0.927	1
DG(19:1_18:1)	DG	37	2	0.329	0.0214	0.257
DG(20:1_20:2)	DG	40	3	0.266	0.0243	0.269
GM3(d18:1_16:0)	GM3	34	1	0	1	1
Hex2Cer(d18:1_16:0)	Hex2Cer	34	1	0.0163	0.675	0.884
Hex2Cer(d18:1_18:0)	Hex2Cer	36	1	0	1	1
Hex2Cer(d18:1_20:0)	Hex2Cer	38	1	0	1	1
Hex2Cer(d18:1_22:0)	Hex2Cer	40	1	0	1	1
Hex2Cer(d18:1_24:0)	Hex2Cer	42	1	0	1	1
Hex2Cer(d18:1_24:1)	Hex2Cer	42	2	0.0723	0.449	0.694
Hex2Cer(d18:1_26:1)	Hex2Cer	44	2	0	1	1
LPC(14:0)	LPC	14	0	-0.0852	0.26	0.565
LPC(15:0)	LPC	15	0	0	1	1
LPC(16:0)	LPC	16	0	0.014	0.825	0.996
LPC(16:1)	LPC	16	1	-0.0878	0.48	0.714
LPC(17:0)	LPC	17	0	0.0171	0.833	1
LPC(18:0)	LPC	18	0	0.077	0.341	0.608
LPC(18:1)	LPC	18	1	0.0148	0.782	0.96
LPC(18:2)	LPC	18	2	-0.034	0.736	0.931
LPC(18:3)	LPC	18	3	0	1	1
LPC(19:0)	LPC	19	0	0	1	1
LPC(19:1)	LPC	19	1	0	1	1
LPC(20:0)	LPC	20	0	0.535	0.439	0.687
LPC(20:1)	LPC	20	1	0.0943	0.317	0.608
LPC(20:2)	LPC	20	2	0	1	1
LPC(20:3)	LPC	20	3	0	1	1
LPC(20:4)	LPC	20	4	0	1	1
LPC(20:5)	LPC	20	5	0	1	1
LPC(22:5)	LPC	22	5	0	1	1
LPC(22:6)	LPC	22	6	0	1	1
LPC(O-16:0)	LPCO	16	0	0.387	0.46	0.695
LPC(O-18:0)	LPCO	18	0	0.519	0.247	0.565
LPC(O-18:1)	LPCO	18	1	-0.0257	0.88	1
LPE(16:0)	LPE	16	0	0.0394	0.668	0.879
LPE(17:0)	LPE	17	0	0.0173	0.972	1
LPE(18:0)	LPE	18	0	0.117	0.0426	0.377
LPE(18:1)	LPE	18	1	0.18	0.0571	0.425
LPE(18:2)	LPE	18	2	0	1	1
LPE(20:1)	LPE	20	1	-0.247	0.33	0.608
LPE(20:4)	LPE	20	4	0	1	1
LPE(20:5)	LPE	20	5	0	1	1
LPE(22:5)	LPE	22	5	0	1	1
LPE(P-20:0)	LPEP	20	0	0.328	0.425	0.677
PC(10:0_16:0)	PC	26	0	0	1	1
PC(10:0_18:1)	PC	28	1	0	1	1
PC(10:0_19:0)	PC	29	0	0.131	0.301	0.603
PC(10:0_21:0)	PC	31	0	0.105	0.245	0.565
PC(10:0_22:0)	PC	32	0	0.121	0.228	0.565
PC(10:0_23:0)	PC	33	0	0.102	0.254	0.565
PC(10:0_24:0)	PC	34	0	0.107	0.237	0.565
PC(10:0_25:0)	PC	35	0	0.156	0.154	0.505
PC(11:0_16:0)	PC	27	0	0	1	1
PC(11:0_25:0)	PC	36	0	0.212	0.177	0.525
PC(12:0_17:1)	PC	29	1	0.0311	0.821	0.994
PC(12:0_18:1)	PC	30	1	0.104	0.403	0.663
PC(12:0_18:2)	PC	30	2	0.052	0.688	0.896
PC(12:0_18:3)	PC	30	3	-0.0618	0.773	0.955
PC(12:0_19:1)	PC	31	1	0.0762	0.418	0.675
PC(12:0_20:1)	PC	32	1	0.0925	0.306	0.606
PC(12:0_20:3)	PC	32	3	0.0744	0.508	0.742
PC(12:0_22:1)	PC	34	1	0.0778	0.234	0.565
PC(12:0_22:2)	PC	34	2	0.105	0.198	0.549
PC(12:0_22:4)	PC	34	4	0.0796	0.457	0.695
PC(12:0_26:0)	PC	38	0	0.267	0.138	0.497
PC(13:0_18:2)	PC	31	2	0.0946	0.437	0.686
PC(13:0_20:1)	PC	33	1	0.112	0.204	0.554
PC(13:0_20:2)	PC	33	2	0.0839	0.34	0.608
PC(13:0_20:3)	PC	33	3	0.141	0.212	0.557
PC(13:0_20:4)	PC	33	4	0	1	1
PC(13:0_22:1)	PC	35	1	0.123	0.149	0.502
PC(13:0_22:2)	PC	35	2	0.114	0.167	0.51
PC(13:0_22:4)	PC	35	4	0.0783	0.418	0.675
PC(14:0_14:0)	PC	28	0	0.142	0.338	0.608
PC(14:0_16:0)	PC	30	0	0.0964	0.391	0.657
PC(14:0_20:3)	PC	34	3	0.088	0.319	0.608
PC(14:0_20:5)	PC	34	5	-0.0449	0.689	0.896
PC(14:0_22:4)	PC	36	4	0.118	0.192	0.536
PC(14:0_22:6)	PC	36	6	-0.0346	0.735	0.931
PC(14:0_24:1)	PC	38	1	0.241	0.104	0.48
PC(14:0_26:0)	PC	40	0	0.261	0.217	0.558
PC(14:1_22:2)	PC	36	3	0.131	0.117	0.492
PC(14:1_22:6)	PC	36	7	0	1	1
PC(15:0_20:5)	PC	35	5	-0.0329	0.772	0.955
PC(15:0_22:1)	PC	37	1	0.199	0.111	0.492
PC(15:0_22:2)	PC	37	2	0.134	0.123	0.492
PC(15:0_22:4)	PC	37	4	0.104	0.177	0.525
PC(15:0_22:6)	PC	37	6	-0.0715	0.524	0.754
PC(15:1_22:2)	PC	37	3	0.116	0.0914	0.459
PC(15:1_22:4)	PC	37	5	0.0341	0.659	0.872
PC(16:0_20:4)	PC	36	4	0.0767	0.262	0.565
PC(16:0_20:5)	PC	36	5	0.0361	0.68	0.888
PC(16:0_22:5)	PC	38	5	0.0709	0.379	0.643
PC(16:0_23:5)	PC	39	5	0.0927	0.249	0.565
PC(16:0_24:1)	PC	40	1	0.251	0.153	0.505
PC(16:0_26:0)	PC	42	0	0.204	0.261	0.565
PC(16:0_26:2)	PC	42	2	0.265	0.142	0.497
PC(16:1_22:2)	PC	38	3	0.136	0.132	0.493
PC(16:1_22:6)	PC	38	7	-0.0247	0.812	0.988
PC(16:1_24:1)	PC	40	2	0.253	0.11	0.492
PC(17:0_20:0)	PC	37	0	0.266	0.145	0.499
PC(17:0_22:1)	PC	39	1	-0.782	0.223	0.565
PC(17:0_22:2)	PC	39	2	0.212	0.115	0.492
PC(17:0_22:4)	PC	39	4	0.133	0.143	0.497
PC(17:0_22:6)	PC	39	6	-0.00357	0.961	1
PC(17:1_22:2)	PC	39	3	0.0697	0.55	0.773
PC(17:1_22:6)	PC	39	7	-0.126	0.287	0.587
PC(18:0_18:1)	PC	36	1	0.124	0.137	0.497
PC(18:0_20:4)	PC	38	4	0.108	0.2	0.551
PC(18:0_22:3)	PC	40	3	0.21	0.13	0.492
PC(18:0_22:4)	PC	40	4	0.123	0.213	0.557
PC(18:0_22:5)	PC	40	5	0.0901	0.261	0.565
PC(18:0_24:1)	PC	42	1	0.267	0.149	0.502
PC(18:1_18:1)	PC	36	2	0.122	0.115	0.492
PC(18:1_20:1)	PC	38	2	0.16	0.101	0.475
PC(18:1_20:5)	PC	38	6	-0.0136	0.867	1
PC(18:1_22:5)	PC	40	6	0.0748	0.354	0.62
PC(18:1_22:6)	PC	40	7	-0.0318	0.71	0.918
PC(18:2_22:6)	PC	40	8	-0.00596	0.952	1
PC(18:3_20:5)	PC	38	8	2.02	0.00318	0.0783
PC(18:3_22:6)	PC	40	9	-0.0414	0.764	0.948
PC(18:3_24:1)	PC	42	4	0.231	0.139	0.497
PC(18:4_22:6)	PC	40	10	0	1	1
PC(19:0_22:2)	PC	41	2	0.242	0.188	0.535
PC(19:0_22:6)	PC	41	6	0.0761	0.334	0.608
PC(19:1_22:4)	PC	41	5	0.221	0.0832	0.459
PC(19:1_22:6)	PC	41	7	-0.0282	0.874	1
PC(20:0_22:5)	PC	42	5	0	1	1
PC(20:0_22:6)	PC	42	6	0.17	0.0955	0.462
PC(20:0_24:1)	PC	44	1	0.285	0.123	0.492
PC(20:1_22:2)	PC	42	3	0.252	0.155	0.506
PC(20:1_22:6)	PC	42	7	0.116	0.263	0.565
PC(20:2_22:6)	PC	42	8	0.067	0.429	0.677
PC(20:3_22:6)	PC	42	9	0.0496	0.542	0.768
PC(20:4_22:6)	PC	42	10	0.0444	0.696	0.903
PC(20:5_22:6)	PC	42	11	0	1	1
PC(21:0_22:1)	PC	43	1	0	1	1
PC(21:0_22:2)	PC	43	2	0.248	0.218	0.558
PC(21:0_22:6)	PC	43	6	0.00669	0.901	1
PC(22:0_22:2)	PC	44	2	0.279	0.122	0.492
PC(22:0_22:4)	PC	44	4	0.198	0.266	0.565
PC(22:0_22:6)	PC	44	6	0.211	0.137	0.497
PC(22:1_22:2)	PC	44	3	0.261	0.165	0.507
PC(22:1_22:4)	PC	44	5	0.214	0.205	0.554
PC(22:1_22:6)	PC	44	7	0.16	0.236	0.565
PC(22:2_22:6)	PC	44	8	0.0427	0.429	0.677
PC(22:4_22:6)	PC	44	10	-0.00314	0.974	1
PC(23:1_23:1)	PC	46	2	0.279	0.156	0.506
PC(O-14:0_15:0)	PC	29	0	0.277	0.0897	0.459
PC(O-14:0_16:0)	PC	30	0	0.108	0.407	0.665
PC(O-14:0_18:0)	PC	32	0	0.0775	0.527	0.755
PC(O-14:0_18:1)	PC	32	1	0.0882	0.426	0.677
PC(O-14:0_18:2)	PC	32	2	0.121	0.22	0.561
PC(O-14:0_18:3)	PC	32	3	0.0959	0.284	0.585
PC(O-14:0_20:4)	PC	34	4	0.092	0.242	0.565
PC(O-14:0_22:0)	PC	36	0	0.182	0.211	0.557
PC(O-15:0_20:4)	PC	35	4	0.231	0.0871	0.459
PC(O-16:0_12:0)	PC	28	0	0.171	0.338	0.608
PC(O-16:0_14:1)	PC	30	1	-0.0474	0.84	1
PC(O-16:0_15:0)	PC	31	0	0.0522	0.651	0.868
PC(O-16:0_15:1)	PC	31	1	0.131	0.164	0.507
PC(O-16:0_17:0)	PC	33	0	0.0744	0.404	0.663
PC(O-16:0_17:1)	PC	33	1	0.105	0.272	0.57
PC(O-16:0_18:0)	PC	34	0	0.143	0.269	0.569
PC(O-16:0_18:1)	PC	34	1	-0.51	0.00329	0.0783
PC(O-16:0_18:2)	PC	34	2	-0.421	0.00372	0.0783
PC(O-16:0_18:3)	PC	34	3	0.113	0.143	0.497
PC(O-16:0_19:0)	PC	35	0	0.176	0.251	0.565
PC(O-16:0_20:3)	PC	36	3	-0.103	0.237	0.565
PC(O-16:0_20:4)	PC	36	4	0.0541	0.46	0.695
PC(O-16:0_20:5)	PC	36	5	0.1	0.154	0.505
PC(O-16:0_22:0)	PC	38	0	0.17	0.34	0.608
PC(O-16:0_22:1)	PC	38	1	0.16	0.239	0.565
PC(O-16:0_22:4)	PC	38	4	0.0913	0.331	0.608
PC(O-16:0_22:5)	PC	38	5	0.0472	0.453	0.695
PC(O-16:0_22:6)	PC	38	6	0.0632	0.395	0.657
PC(O-17:0_20:4)	PC	37	4	0.0769	0.428	0.677
PC(O-18:0_17:2)	PC	35	2	0.124	0.129	0.492
PC(O-18:0_18:1)	PC	36	1	-0.492	0.000326	0.0144
PC(O-18:0_22:1)	PC	40	1	0.167	0.3	0.603
PC(O-18:0_22:2)	PC	40	2	0.162	0.259	0.565
PC(O-18:0_22:4)	PC	40	4	0.0652	0.618	0.838
PC(O-18:0_22:5)	PC	40	5	0.0742	0.551	0.773
PC(O-18:0_22:6)	PC	40	6	0.0778	0.319	0.608
PC(O-18:1_18:1)	PC	36	2	-0.472	0.000548	0.0202
PC(O-18:2_24:0)	PC	42	2	0.145	0.345	0.612
PC(O-20:0_20:3)	PC	40	3	0.131	0.351	0.618
PC(O-20:0_22:4)	PC	42	4	0.147	0.31	0.608
PC(O-20:0_22:6)	PC	42	6	0.124	0.127	0.492
PC(O-22:1_22:3)	PC	44	4	0.139	0.313	0.608
PC(O-24:0_18:3)	PC	42	3	0.123	0.392	0.657
PC(P-16:0_12:0)	PC	28	0	0.147	0.293	0.596
PC(P-16:0_13:0)	PC	29	0	0.137	0.226	0.565
PC(P-16:0_14:0)	PC	30	0	0.12	0.19	0.535
PC(P-16:0_14:1)	PC	30	1	0.111	0.306	0.606
PC(P-16:0_15:1)	PC	31	1	0.111	0.215	0.557
PC(P-16:0_16:0)	PC	32	0	0.0858	0.441	0.687
PC(P-16:0_17:0)	PC	33	0	0.0852	0.327	0.608
PC(P-16:0_17:1)	PC	33	1	0.175	0.0524	0.409
PC(P-16:0_17:2)	PC	33	2	0.134	0.108	0.492
PC(P-16:0_18:1)	PC	34	1	0.121	0.19	0.535
PC(P-16:0_18:2)	PC	34	2	0.0513	0.601	0.822
PC(P-16:0_18:3)	PC	34	3	0.0983	0.399	0.659
PC(P-16:0_18:4)	PC	34	4	0.185	0.143	0.497
PC(P-16:0_19:1)	PC	35	1	0.0677	0.44	0.687
PC(P-16:0_20:3)	PC	36	3	-0.0964	0.581	0.806
PC(P-16:0_20:4)	PC	36	4	0.0176	0.896	1
PC(P-16:0_20:5)	PC	36	5	0.101	0.253	0.565
PC(P-16:0_22:4)	PC	38	4	0.0723	0.356	0.62
PC(P-16:0_22:6)	PC	38	6	1.92	4.67e-07	4.43e-05
PC(P-18:0_17:2)	PC	35	2	0.108	0.171	0.516
PC(P-18:0_18:1)	PC	36	1	0.131	0.261	0.565
PC(P-18:0_20:5)	PC	38	5	1.24	0.000129	0.00658
PC(P-18:0_22:4)	PC	40	4	0.0713	0.33	0.608
PC(P-18:0_22:6)	PC	40	6	0.0337	0.648	0.866
PC(P-18:1_18:1)	PC	36	2	-0.55	1.89e-05	0.00125
PC(P-20:0_20:5)	PC	40	5	0.0277	0.716	0.921
PC(P-20:0_22:4)	PC	42	4	0.191	0.129	0.492
PE(14:0_16:0)	PE	30	0	0.0667	0.597	0.817
PE(14:0_16:1)	PE	30	1	-0.121	0.85	1
PE(14:0_18:1)	PE	32	1	0.226	0.184	0.534
PE(14:0_20:4)	PE	34	4	0.362	0.493	0.723
PE(15:0_16:0)	PE	31	0	-0.148	0.613	0.836
PE(15:0_18:0)	PE	33	0	-0.199	0.132	0.493
PE(15:0_18:1)	PE	33	1	-0.296	0.364	0.631
PE(16:0_16:0)	PE	32	0	0.0561	0.592	0.815
PE(16:0_17:0)	PE	33	0	0.0492	0.614	0.836
PE(16:0_18:0)	PE	34	0	0.176	0.0842	0.459
PE(16:0_18:1)	PE	34	1	0.142	0.141	0.497
PE(16:0_18:2)	PE	34	2	0.166	0.0879	0.459
PE(16:0_18:3)	PE	34	3	-0.0297	0.951	1
PE(16:0_20:4)	PE	36	4	0.126	0.209	0.557
PE(16:0_20:5)	PE	36	5	-0.0108	0.914	1
PE(16:1_16:1)	PE	32	2	-0.00976	0.986	1
PE(16:1_17:0)	PE	33	1	-0.081	0.858	1
PE(16:1_17:1)	PE	33	2	-0.316	0.477	0.713
PE(16:1_18:2)	PE	34	3	-0.218	0.542	0.768
PE(16:1_20:5)	PE	36	6	1.42	0.0113	0.16
PE(17:0_18:0)	PE	35	0	-0.127	0.404	0.663
PE(17:0_18:1)	PE	35	1	0.121	0.0904	0.459
PE(17:0_18:3)	PE	35	3	-0.253	0.232	0.565
PE(17:0_20:3)	PE	37	3	-0.107	0.632	0.849
PE(17:0_20:4)	PE	37	4	1.14	0.000992	0.0329
PE(17:0_20:5)	PE	37	5	-0.00325	0.977	1
PE(17:1_18:1)	PE	35	2	-0.631	0.000705	0.0246
PE(17:1_18:2)	PE	35	3	-0.365	0.249	0.565
PE(18:0_18:1)	PE	36	1	0.134	0.134	0.496
PE(18:0_19:1)	PE	37	1	-0.308	0.123	0.492
PE(18:0_20:1)	PE	38	1	-0.427	0.315	0.608
PE(18:0_20:2)	PE	38	2	0.309	0.0662	0.439
PE(18:0_20:3)	PE	38	3	-0.193	0.371	0.635
PE(18:0_20:4)	PE	38	4	0.0852	0.254	0.565
PE(18:0_20:5)	PE	38	5	0.0344	0.638	0.855
PE(18:0_22:2)	PE	40	2	0.16	0.0981	0.468
PE(18:0_22:4)	PE	40	4	0.243	0.0324	0.322
PE(18:0_24:1)	PE	42	1	0.213	0.0819	0.459
PE(18:1_18:1)	PE	36	2	0.192	0.0551	0.422
PE(18:1_18:2)	PE	36	3	0.194	0.114	0.492
PE(18:1_19:0)	PE	37	1	-1.2	0.0344	0.332
PE(18:1_19:1)	PE	37	2	-0.831	0.00856	0.135
PE(18:1_20:1)	PE	38	2	0.167	0.0853	0.459
PE(18:1_20:5)	PE	38	6	-0.0904	0.242	0.565
PE(18:1_22:0)	PE	40	1	0.2	0.328	0.608
PE(18:1_22:2)	PE	40	3	-0.976	0.2	0.551
PE(18:1_22:4)	PE	40	5	0.127	0.123	0.492
PE(18:1_22:6)	PE	40	7	0.599	0.0774	0.459
PE(18:2_20:5)	PE	38	7	1.26	0.00378	0.0783
PE(18:2_22:4)	PE	40	6	0.118	0.183	0.534
PE(19:1_20:1)	PE	39	2	-0.834	0.297	0.601
PE(20:0_22:6)	PE	42	6	0.189	0.0964	0.463
PE(20:3_20:5)	PE	40	8	1.69	0.00369	0.0783
PE(20:4_22:0)	PE	42	4	1.33	1.41e-05	0.00117
PE(O-16:0_16:0)	PE	32	0	-0.592	0.33	0.608
PE(O-18:0_16:0)	PE	34	0	-0.259	0.395	0.657
PE(O-18:0_20:4)	PE	38	4	0.61	0.00229	0.0659
PE(O-20:0_22:4)	PE	42	4	-0.369	0.33	0.608
PE(P-16:0_14:0)	PE	30	0	0.167	0.459	0.695
PE(P-16:0_16:0)	PE	32	0	0.121	0.329	0.608
PE(P-16:0_16:1)	PE	32	1	0.169	0.15	0.503
PE(P-16:0_17:1)	PE	33	1	-1.14	3.16e-05	0.0019
PE(P-16:0_18:1)	PE	34	1	0.193	0.0886	0.459
PE(P-16:0_18:2)	PE	34	2	0.152	0.0878	0.459
PE(P-16:0_18:3)	PE	34	3	0.207	0.061	0.438
PE(P-16:0_20:3)	PE	36	3	0.157	0.168	0.511
PE(P-16:0_20:4)	PE	36	4	0.138	0.187	0.535
PE(P-16:0_20:5)	PE	36	5	-0.00614	0.945	1
PE(P-16:0_22:4)	PE	38	4	-0.0721	0.741	0.934
PE(P-16:0_22:6)	PE	38	6	0.0019	0.984	1
PE(P-18:0_16:0)	PE	34	0	0.129	0.309	0.608
PE(P-18:0_18:1)	PE	36	1	0.196	0.0848	0.459
PE(P-18:0_18:2)	PE	36	2	0.114	0.173	0.521
PE(P-18:0_18:3)	PE	36	3	0.125	0.245	0.565
PE(P-18:0_20:1)	PE	38	1	0.199	0.118	0.492
PE(P-18:0_20:2)	PE	38	2	-1.53	0.000316	0.0144
PE(P-18:0_20:3)	PE	38	3	0.106	0.305	0.606
PE(P-18:0_20:4)	PE	38	4	0.0925	0.259	0.565
PE(P-18:0_20:5)	PE	38	5	0.0235	0.744	0.936
PE(P-18:0_22:2)	PE	40	2	0.164	0.232	0.565
PE(P-18:0_22:4)	PE	40	4	0.162	0.244	0.565
PE(P-18:0_22:6)	PE	40	6	0.0235	0.763	0.948
PE(P-18:1_22:6)	PE	40	7	-0.0154	0.889	1
PE(P-20:0_16:0)	PE	36	0	-0.0835	0.847	1
PE(P-20:0_20:4)	PE	40	4	0.0995	0.436	0.686
PE(P-20:0_22:4)	PE	42	4	0.309	0.256	0.565
PE(P-20:0_22:6)	PE	42	6	1.99	4.13e-07	4.43e-05
PG(16:0_16:1)	PG	32	1	0.445	0.161	0.507
PG(16:0_18:2)	PG	34	2	0.259	0.233	0.565
PG(16:1_18:1)	PG	34	2	-0.134	0.417	0.675
PG(18:0_18:2)	PG	36	2	-1.6	0.00334	0.0783
PG(18:0_20:4)	PG	38	4	-0.964	0.00482	0.094
PG(18:1_16:0)	PG	34	1	0.106	0.414	0.674
PG(18:1_17:0)	PG	35	1	0.0971	0.335	0.608
PG(18:1_18:0)	PG	36	1	-0.0331	0.665	0.878
PG(18:1_18:1)	PG	36	2	-1	0.00304	0.0783
PG(18:1_18:2)	PG	36	3	-0.85	0.0177	0.238
PG(18:1_18:3)	PG	36	4	-0.763	0.08	0.459
PG(18:1_20:3)	PG	38	4	-0.334	0.00946	0.143
PG(18:1_20:4)	PG	38	5	0.194	0.44	0.687
PG(18:1_20:5)	PG	38	6	1.62	0.00436	0.0877
PG(18:1_22:6)	PG	40	7	1.98	8.42e-10	1.86e-07
PG(18:2_18:2)	PG	36	4	-0.255	0.405	0.664
PG(18:2_18:3)	PG	36	5	0	1	1
PG(18:2_20:4)	PG	38	6	0.637	0.00777	0.135
PG(18:3_22:6)	PG	40	9	0.914	8.4e-05	0.00464
PG(20:3_22:6)	PG	42	9	1.84	9.4e-08	1.56e-05
PG(20:4_22:6)	PG	42	10	1.56	1.76e-07	2.33e-05
PG(20:5_22:6)	PG	42	11	2.36	7.77e-10	1.86e-07
PG(22:6_22:6)	PG	44	12	4.28	6.2e-13	4.11e-10
PI(14:0_18:1)	PI	32	1	0.00101	0.997	1
PI(16:0_16:0)	PI	32	0	0.586	0.0198	0.25
PI(16:0_16:1)	PI	32	1	0.00769	0.984	1
PI(16:0_18:0)	PI	34	0	-0.192	0.588	0.811
PI(16:0_18:1)	PI	34	1	-0.264	0.201	0.551
PI(16:0_20:3)	PI	36	3	-0.594	0.124	0.492
PI(16:0_20:4)	PI	36	4	1.41	0.00519	0.0983
PI(16:0_20:5)	PI	36	5	1.45	0.00327	0.0783
PI(16:0_22:6)	PI	38	6	1.37	1.64e-05	0.00121
PI(16:1_18:1)	PI	34	2	-0.22	0.297	0.601
PI(17:0_18:1)	PI	35	1	-0.329	0.153	0.505
PI(17:0_20:4)	PI	37	4	1.3	0.00743	0.133
PI(17:1_18:0)	PI	35	1	0	1	1
PI(17:1_18:1)	PI	35	2	-0.306	0.265	0.565
PI(18:0_18:1)	PI	36	1	-0.524	0.0238	0.267
PI(18:0_18:2)	PI	36	2	-0.475	0.0228	0.26
PI(18:0_18:3)	PI	36	3	-0.379	0.0461	0.382
PI(18:0_19:1)	PI	37	1	-1.69	0.0101	0.149
PI(18:0_20:1)	PI	38	1	-2.87	0.00848	0.135
PI(18:0_20:2)	PI	38	2	-2.19	0.00357	0.0783
PI(18:0_20:3)	PI	38	3	-0.309	0.322	0.608
PI(18:0_20:4)	PI	38	4	1.15	0.000355	0.0147
PI(18:0_20:5)	PI	38	5	0.7	0.00109	0.0343
PI(18:0_22:1)	PI	40	1	-0.497	0.33	0.608
PI(18:0_22:2)	PI	40	2	-1.07	0.33	0.608
PI(18:0_22:4)	PI	40	4	-0.409	0.128	0.492
PI(18:0_22:6)	PI	40	6	0.408	0.126	0.492
PI(18:1_18:2)	PI	36	3	0.141	0.653	0.869
PI(18:1_19:1)	PI	37	2	-1.76	0.00921	0.142
PI(18:1_20:1)	PI	38	2	-2.29	0.00849	0.135
PI(18:1_20:3)	PI	38	4	-0.236	0.504	0.738
PI(18:1_20:4)	PI	38	5	0.701	0.00223	0.0659
PI(18:1_20:5)	PI	38	6	0.694	0.000523	0.0202
PI(18:1_22:2)	PI	40	3	-1.29	0.0345	0.332
PI(20:1_20:4)	PI	40	5	0.367	0.0757	0.459
PS(16:0_16:1)	PS	32	1	0.761	0.378	0.642
PS(16:0_18:1)	PS	34	1	0.423	0.34	0.608
PS(16:0_18:2)	PS	34	2	0.531	0.482	0.715
PS(18:0_18:1)	PS	36	1	0.235	0.456	0.695
PS(18:0_18:2)	PS	36	2	0.0852	0.776	0.957
PS(18:0_18:3)	PS	36	3	-0.0458	0.943	1
PS(18:0_22:6)	PS	40	6	1.93	0.00663	0.122
SM 32:0	SM	32	0	0.218	0.19	0.535
SM 32:1	SM	32	1	0.158	0.214	0.557
SM 33:0	SM	33	0	0	1	1
SM 33:1	SM	33	1	0.156	0.245	0.565
SM 33:2	SM	33	2	0	1	1
SM 34:0	SM	34	0	0.152	0.279	0.579
SM 34:1	SM	34	1	0.147	0.148	0.502
SM 35:0	SM	35	0	0.14	0.466	0.701
SM 35:1	SM	35	1	0.15	0.115	0.492
SM 36:0	SM	36	0	0.142	0.48	0.714
SM 36:1	SM	36	1	0.153	0.13	0.492
SM 36:2	SM	36	2	0.12	0.237	0.565
SM 38:0	SM	38	0	0.149	0.115	0.492
SM 38:2	SM	38	2	0.178	0.0814	0.459
SM 40:0	SM	40	0	0.256	0.0891	0.459
SM 40:1	SM	40	1	0.258	0.0482	0.392
SM 40:2	SM	40	2	0.117	0.249	0.565
SM 41:1	SM	41	1	0.173	0.205	0.554
SM 41:2	SM	41	2	0.17	0.185	0.535
SM 42:1	SM	42	1	0.28	0.0651	0.439
SM 42:2	SM	42	2	0.24	0.0631	0.439
SM 43:1	SM	43	1	0.263	0.0913	0.459
SM 43:2	SM	43	2	0.238	0.087	0.459
SM 44:0	SM	44	0	0	1	1
SM 44:2	SM	44	2	0.265	0.0943	0.462
TG(12:0_12:0_14:0)	TG	38	0	0.0704	0.0909	0.459
TG(12:0_12:0_16:0)	TG	40	0	0.0283	0.845	1
TG(12:0_14:0_15:0)	TG	41	0	0	1	1
TG(12:0_14:0_16:0)	TG	42	0	0.0731	0.453	0.695
TG(12:0_14:0_16:1)	TG	42	1	0.0926	0.346	0.612
TG(12:0_14:0_18:1)	TG	44	1	0.0944	0.449	0.694
TG(12:0_14:1_16:1)	TG	42	2	0	1	1
TG(12:0_15:0_18:1)	TG	45	1	0	1	1
TG(12:0_16:0_17:0)	TG	45	0	0.1	0.206	0.554
TG(12:0_16:0_20:5)	TG	48	5	0	1	1
TG(13:0_14:0_16:0)	TG	43	0	0.0357	0.73	0.928
TG(14:0_14:0_16:0)	TG	44	0	0.0828	0.265	0.565
TG(14:0_14:0_17:0)	TG	45	0	0.079	0.205	0.554
TG(14:0_14:1_15:0)	TG	43	1	0	1	1
TG(14:0_14:1_18:2)	TG	46	3	0.0347	0.737	0.931
TG(14:0_15:0_16:0)	TG	45	0	0.0416	0.622	0.841
TG(14:0_15:0_16:1)	TG	45	1	0.079	0.553	0.775
TG(14:0_15:0_20:5)	TG	49	5	0	1	1
TG(14:0_15:0_22:5)	TG	51	5	-0.0752	0.266	0.565
TG(14:0_16:0_16:1)	TG	46	1	0.123	0.143	0.497
TG(14:0_16:0_18:1)	TG	48	1	0.136	0.129	0.492
TG(14:0_16:0_20:4)	TG	50	4	-0.0393	0.773	0.955
TG(14:0_16:1_17:0)	TG	47	1	0.152	0.114	0.492
TG(14:0_16:1_17:1)	TG	47	2	0.105	0.396	0.657
TG(14:0_16:1_18:1)	TG	48	2	0.095	0.193	0.536
TG(14:0_16:1_18:3)	TG	48	4	0.063	0.58	0.806
TG(14:0_16:1_20:5)	TG	50	6	0	1	1
TG(14:0_17:0_18:0)	TG	49	0	0.152	0.163	0.507
TG(14:0_17:0_18:1)	TG	49	1	0.171	0.0823	0.459
TG(14:0_18:1_18:3)	TG	50	4	0.00606	0.942	1
TG(14:0_18:2_20:4)	TG	52	6	-0.0557	0.623	0.842
TG(14:1_15:0_16:1)	TG	45	2	0.00511	0.956	1
TG(14:1_15:0_18:2)	TG	47	3	0	1	1
TG(14:1_16:0_16:1)	TG	46	2	0.052	0.521	0.753
TG(14:1_16:0_18:2)	TG	48	3	0.0514	0.396	0.657
TG(14:1_18:0_18:4)	TG	50	5	-0.0697	0.579	0.806
TG(15:0_15:0_16:0)	TG	46	0	0.144	0.0834	0.459
TG(15:0_15:0_17:0)	TG	47	0	0.053	0.625	0.843
TG(15:0_16:0_16:0)	TG	47	0	0.146	0.0137	0.189
TG(15:0_16:0_16:1)	TG	47	1	0.0778	0.328	0.608
TG(15:0_16:0_17:0)	TG	48	0	0.067	0.341	0.608
TG(15:0_16:0_18:1)	TG	49	1	0.102	0.16	0.507
TG(15:0_16:0_22:5)	TG	53	5	-0.0643	0.616	0.838
TG(15:0_16:1_18:1)	TG	49	2	0.0415	0.254	0.565
TG(15:0_16:1_18:2)	TG	49	3	0.0574	0.34	0.608
TG(15:0_16:1_18:3)	TG	49	4	0	1	1
TG(15:0_16:1_20:5)	TG	51	6	0	1	1
TG(15:0_17:0_18:0)	TG	50	0	0.195	0.0671	0.441
TG(15:0_17:0_19:1)	TG	51	1	0.164	0.239	0.565
TG(15:0_18:1_18:3)	TG	51	4	0.0244	0.722	0.923
TG(15:0_18:1_22:5)	TG	55	6	-0.102	0.282	0.582
TG(15:0_18:2_20:5)	TG	53	7	0	1	1
TG(15:0_18:2_22:5)	TG	55	7	-0.189	0.659	0.872
TG(16:0_16:0_16:0)	TG	48	0	0.24	0.0209	0.257
TG(16:0_16:0_17:0)	TG	49	0	0.173	0.0427	0.377
TG(16:0_16:0_18:1)	TG	50	1	0.176	0.0704	0.454
TG(16:0_16:1_18:1)	TG	50	2	0.0994	0.245	0.565
TG(16:0_16:1_18:2)	TG	50	3	0.0505	0.517	0.752
TG(16:0_16:1_20:5)	TG	52	6	-0.258	0.0618	0.438
TG(16:0_17:0_18:0)	TG	51	0	0.196	0.0449	0.377
TG(16:0_17:0_18:1)	TG	51	1	0.11	0.251	0.565
TG(16:0_17:0_19:0)	TG	52	0	0.134	0.26	0.565
TG(16:0_17:0_22:5)	TG	55	5	-0.015	0.863	1
TG(16:0_17:1_18:0)	TG	51	1	0.181	0.0438	0.377
TG(16:0_17:1_18:1)	TG	51	2	0.0916	0.271	0.57
TG(16:0_17:1_22:6)	TG	55	7	0	1	1
TG(16:0_18:0_18:0)	TG	52	0	0.221	0.0525	0.409
TG(16:0_18:0_18:1)	TG	52	1	0.163	0.122	0.492
TG(16:0_18:0_19:0)	TG	53	0	0.207	0.0567	0.425
TG(16:0_18:0_20:4)	TG	54	4	0.0631	0.465	0.7
TG(16:0_18:0_21:0)	TG	55	0	0.171	0.0487	0.392
TG(16:0_18:0_22:0)	TG	56	0	0.187	0.122	0.492
TG(16:0_18:0_22:5)	TG	56	5	-0.025	0.75	0.94
TG(16:0_18:1_18:1)	TG	52	2	0.142	0.137	0.497
TG(16:0_18:1_18:2)	TG	52	3	0.0779	0.354	0.62
TG(16:0_18:1_18:3)	TG	52	4	0.0194	0.801	0.976
TG(16:0_18:1_22:5)	TG	56	6	-0.0538	0.547	0.773
TG(16:0_18:2_22:5)	TG	56	7	-0.122	0.162	0.507
TG(16:0_20:2_20:3)	TG	56	5	0.0263	0.864	1
TG(16:0_20:4_20:5)	TG	56	9	0	1	1
TG(16:0_20:4_22:6)	TG	58	10	0	1	1
TG(16:0_20:5_22:5)	TG	58	10	-0.0443	0.149	0.502
TG(16:0_22:5_22:6)	TG	60	11	0	1	1
TG(16:1_17:1_18:1)	TG	51	3	0.0608	0.388	0.657
TG(16:1_18:0_18:4)	TG	52	5	-0.0493	0.536	0.766
TG(16:1_18:0_20:4)	TG	54	5	-0.0279	0.724	0.925
TG(16:1_18:1_19:1)	TG	53	3	0.103	0.251	0.565
TG(16:1_18:1_20:4)	TG	54	6	-0.098	0.253	0.565
TG(16:1_18:1_20:5)	TG	54	7	-0.229	0.0314	0.322
TG(16:1_18:1_22:6)	TG	56	8	-0.214	0.0432	0.377
TG(16:1_20:5_22:5)	TG	58	11	0	1	1
TG(17:0_17:0_18:1)	TG	52	1	0.0745	0.585	0.81
TG(17:0_17:1_19:1)	TG	53	2	0.186	0.217	0.558
TG(17:0_18:0_18:1)	TG	53	1	0.192	0.059	0.435
TG(17:0_18:0_22:5)	TG	57	5	0.055	0.524	0.754
TG(17:0_18:1_18:1)	TG	53	2	0.112	0.277	0.579
TG(17:0_18:1_18:2)	TG	53	3	0.0335	0.731	0.928
TG(17:0_18:1_20:0)	TG	55	1	0.208	0.0746	0.459
TG(17:0_18:1_20:5)	TG	55	6	-0.169	0.0621	0.438
TG(17:0_18:1_22:1)	TG	57	2	0.202	0.065	0.439
TG(17:0_18:1_22:5)	TG	57	6	-0.00712	0.933	1
TG(17:0_20:3_22:5)	TG	59	8	-0.109	0.394	0.657
TG(17:0_20:5_22:5)	TG	59	10	0	1	1
TG(17:1_18:0_18:2)	TG	53	3	0.08	0.376	0.641
TG(17:1_18:0_18:3)	TG	53	4	-0.0506	0.755	0.945
TG(17:1_18:1_18:2)	TG	53	4	0.0569	0.526	0.755
TG(17:1_18:1_18:3)	TG	53	5	-0.0996	0.247	0.565
TG(17:1_18:1_22:5)	TG	57	7	-0.103	0.177	0.525
TG(17:1_18:1_22:6)	TG	57	8	0	1	1
TG(17:1_18:2_18:3)	TG	53	6	-0.118	0.423	0.676
TG(17:1_18:2_22:5)	TG	57	8	0	1	1
TG(18:0_18:0_18:0)	TG	54	0	0.187	0.0946	0.462
TG(18:0_18:0_18:1)	TG	54	1	0.204	0.0741	0.459
TG(18:0_18:0_22:5)	TG	58	5	-0.0223	0.852	1
TG(18:0_18:1_18:1)	TG	54	2	0.142	0.185	0.534
TG(18:0_18:1_18:2)	TG	54	3	0.124	0.303	0.606
TG(18:0_18:1_19:1)	TG	55	2	0.17	0.101	0.475
TG(18:0_18:1_20:0)	TG	56	1	0.2	0.12	0.492
TG(18:0_18:1_20:1)	TG	56	2	0.184	0.113	0.492
TG(18:0_18:1_20:2)	TG	56	3	1.31	0.128	0.492
TG(18:0_18:1_20:3)	TG	56	4	0.0868	0.52	0.753
TG(18:0_18:1_20:5)	TG	56	6	-0.113	0.163	0.507
TG(18:0_18:1_21:0)	TG	57	1	0.162	0.138	0.497
TG(18:0_18:1_22:0)	TG	58	1	0.206	0.215	0.557
TG(18:0_18:1_22:1)	TG	58	2	0.188	0.163	0.507
TG(18:0_18:1_22:5)	TG	58	6	-0.0853	0.355	0.62
TG(18:0_18:1_22:6)	TG	58	7	-0.105	0.32	0.608
TG(18:0_18:2_20:1)	TG	56	3	0.169	0.181	0.531
TG(18:0_18:2_20:5)	TG	56	7	-0.197	0.061	0.438
TG(18:0_18:2_22:4)	TG	58	6	0.224	0.0415	0.377
TG(18:0_18:2_22:5)	TG	58	7	0.00966	0.89	1
TG(18:0_20:0_20:1)	TG	58	1	0.21	0.156	0.506
TG(18:0_20:1_20:3)	TG	58	4	0.631	0.0726	0.458
TG(18:0_20:1_22:5)	TG	60	6	0.0879	0.423	0.676
TG(18:0_20:3_22:4)	TG	60	7	0.0742	0.288	0.587
TG(18:0_20:3_22:5)	TG	60	8	-0.0375	0.676	0.884
TG(18:0_20:4_22:5)	TG	60	9	-0.00832	0.923	1
TG(18:0_20:5_22:5)	TG	60	10	0	1	1
TG(18:0_22:1_22:5)	TG	62	6	0.104	0.542	0.768
TG(18:0_22:3_22:5)	TG	62	8	-0.064	0.593	0.815
TG(18:0_22:4_22:5)	TG	62	9	-0.168	0.0403	0.371
TG(18:0_22:5_22:5)	TG	62	10	-0.00287	0.628	0.844
TG(18:1_18:1_18:1)	TG	54	3	0.0923	0.338	0.608
TG(18:1_18:1_20:1)	TG	56	3	0.213	0.0831	0.459
TG(18:1_18:1_20:2)	TG	56	4	0.0939	0.328	0.608
TG(18:1_18:1_22:4)	TG	58	6	0.094	0.419	0.675
TG(18:1_18:1_22:5)	TG	58	7	-0.0997	0.278	0.579
TG(18:1_18:1_22:6)	TG	58	8	-0.192	0.0554	0.422
TG(18:1_18:2_19:0)	TG	55	3	0.144	0.179	0.528
TG(18:1_18:2_19:1)	TG	55	4	0.0657	0.448	0.694
TG(18:1_18:2_20:2)	TG	56	5	0.104	0.317	0.608
TG(18:1_18:2_22:6)	TG	58	9	0	1	1
TG(18:1_18:3_22:5)	TG	58	9	-0.188	0.0659	0.439
TG(18:1_19:0_22:1)	TG	59	2	0.138	0.28	0.581
TG(18:1_19:0_22:5)	TG	59	6	0.0352	0.747	0.938
TG(18:1_19:1_20:0)	TG	57	2	0.166	0.213	0.557
TG(18:1_19:1_20:1)	TG	57	3	0.17	0.145	0.499
TG(18:1_19:1_20:2)	TG	57	4	0.0415	0.798	0.975
TG(18:1_19:1_20:3)	TG	57	5	-0.0217	0.822	0.994
TG(18:1_19:1_22:1)	TG	59	3	0.236	0.117	0.492
TG(18:1_19:1_22:2)	TG	59	4	0.0694	0.657	0.872
TG(18:1_19:1_22:4)	TG	59	6	0.0174	0.834	1
TG(18:1_19:1_22:5)	TG	59	7	-0.0325	0.721	0.923
TG(18:1_20:1_20:1)	TG	58	3	0.17	0.163	0.507
TG(18:1_20:1_20:2)	TG	58	4	0.0563	0.781	0.96
TG(18:1_20:1_20:3)	TG	58	5	0.0413	0.731	0.928
TG(18:1_20:1_22:0)	TG	60	2	0.207	0.189	0.535
TG(18:1_20:1_22:1)	TG	60	3	0.17	0.215	0.557
TG(18:1_20:1_22:3)	TG	60	5	0.104	0.37	0.634
TG(18:1_20:1_22:4)	TG	60	6	0.139	0.26	0.565
TG(18:1_20:1_22:5)	TG	60	7	0.0266	0.709	0.918
TG(18:1_20:2_20:2)	TG	58	5	0.113	0.251	0.565
TG(18:1_20:2_22:1)	TG	60	4	0.15	0.261	0.565
TG(18:1_20:2_22:4)	TG	60	7	0.12	0.484	0.716
TG(18:1_20:3_20:4)	TG	58	8	0.0112	0.894	1
TG(18:1_20:3_22:4)	TG	60	8	0.0304	0.762	0.948
TG(18:1_20:3_22:5)	TG	60	9	-0.0624	0.515	0.751
TG(18:1_20:3_22:6)	TG	60	10	-0.144	0.228	0.565
TG(18:1_20:5_22:5)	TG	60	11	0	1	1
TG(18:1_22:1_22:1)	TG	62	3	0.17	0.27	0.569
TG(18:1_22:1_22:5)	TG	62	7	-0.00369	0.973	1
TG(18:1_22:3_22:5)	TG	62	9	-0.00189	0.984	1
TG(18:1_22:4_22:5)	TG	62	10	0.0144	0.862	1
TG(18:1_22:5_22:5)	TG	62	11	-0.0845	0.46	0.695
TG(18:1_22:5_22:6)	TG	62	12	0	1	1
TG(18:2_19:1_22:1)	TG	59	4	0.279	0.0249	0.27
TG(18:2_20:2_22:5)	TG	60	9	-0.0326	0.788	0.964
TG(18:2_20:3_22:5)	TG	60	10	0	1	1
TG(18:2_20:5_22:5)	TG	60	12	0	1	1
TG(18:2_22:5_22:6)	TG	62	13	0	1	1
TG(20:1_20:1_20:4)	TG	60	6	0.0776	0.48	0.714
TG(20:1_20:1_22:5)	TG	62	7	0.143	0.165	0.507
TG(20:1_20:2_22:5)	TG	62	8	0.0808	0.368	0.634
TG(20:1_20:3_22:1)	TG	62	5	0.0987	0.493	0.723
TG(20:1_20:4_22:1)	TG	62	6	0.124	0.366	0.634
TG(20:1_22:0_22:2)	TG	64	3	-0.517	0.397	0.657
TG(20:1_22:1_22:2)	TG	64	4	0.0337	0.818	0.993
TG(20:1_22:1_22:5)	TG	64	7	0.0971	0.489	0.721
TG(20:1_22:2_22:5)	TG	64	8	0	1	1
TG(20:1_22:3_22:5)	TG	64	9	0.0368	0.713	0.918
TG(20:2_22:2_22:4)	TG	64	8	0.105	0.33	0.608
TG(20:2_22:3_22:5)	TG	64	10	0.0713	0.339	0.608
TG(20:2_22:5_22:5)	TG	64	12	0	1	1
TG(20:3_20:5_22:6)	TG	62	14	0	1	1
TG(20:3_22:3_22:5)	TG	64	11	0.109	0.369	0.634
