# Supplementary material for: ACSL4-Associated Lipid Metabolism is a Distinct Therapeutic Vulnerability in KMT2A-Rearranged Acute Myeloid Leukemia
Source: Research Square preprint supplement (doi:10.21203/rs.3.rs-4924771/v1), 2024-10-15
Supplement: Supplementary file 5 [file bf26567b0d94056d362032ae.xlsx]

## Sheet: TCGA_KRADS12 score
Supplementary Table S5A: Log2FC of KRADS12 gene expression data of TCGA-LAML cohort
Patient	ABHD3	ACSL3	CALU	CYP51A1	DPYSL2	FADS1	GLIPR1	HMGCS1	IDI1	KCTD12	PSAT1	SCD		SUM	KRADS12
TCGA-AB-2897	0.0572355	-0.638567	-0.557447	-1.24955	-3.66976	-2.16989	-0.808191	-1.0569	-0.475086	-4.05255	-2.53579	-2.41472		-19.5712	low
TCGA-AB-2862	0.397006	-0.910793	0.208028	-2.3502	-2.70445	-1.89388	0.0886506	-1.51263	-0.66907	-4.47629	0.613936	-3.83203		-17.0417	low
TCGA-AB-3011	0.206463	-0.957802	-0.366392	-1.06703	-3.53039	-1.22885	-0.498363	-1.0344	-0.905498	-2.60562	-1.27283	-2.15175		-15.4125	low
TCGA-AB-2872	0.361741	-0.360106	-0.0568258	-1.67331	-2.38324	-3.12184	-2.33615	-1.07278	0.0395178	-3.68922	0.938526	-0.865632		-14.2193	low
TCGA-AB-2955	-0.054643	-1.32713	-0.265689	-0.16342	-2.62627	-1.53472	1.02928	0.0490031	0.342289	-1.99954	-4.16085	-3.28489		-13.9966	low
TCGA-AB-2803	0.332417	-0.122597	0.100792	-0.86334	-2.29482	-2.55825	-0.611396	-0.440035	-0.293058	-3.21372	-2.08286	-1.33729		-13.3842	low
TCGA-AB-3006	-0.0427813	-0.256058	0.175583	-0.522454	-4.8466	0.0463847	-2.29628	-0.200057	-0.819985	-2.59938	0.0323061	-1.99862		-13.328	low
TCGA-AB-2919	0.0822081	-0.553136	0.000562886	-2.22547	-1.45781	0.126176	-0.797308	-0.632107	-1.02221	-4.02336	-1.46364	-0.623754		-12.5899	low
TCGA-AB-2886	-0.0649535	-0.350958	-0.0892096	-0.884463	-1.86325	-2.28861	-0.218214	-0.439593	0.261661	-3.27621	-0.943413	-2.38938		-12.5466	low
TCGA-AB-2979	-0.693067	-1.54023	-0.358625	-1.14315	-0.187404	-1.18911	0.120509	-1.00469	-0.239041	-0.174796	-1.77112	-4.02856		-12.2093	low
TCGA-AB-2871	-0.591888	-0.415534	-0.240923	-0.690028	-2.82675	-0.0531992	-1.55032	-0.377524	-0.584274	-2.9394	0.0564702	-1.3337		-11.5471	low
TCGA-AB-2984	1.09399	-0.173184	-1.31129	-0.821741	-1.51984	-1.31526	-0.073148	-1.05836	-0.997012	-0.628147	-1.00979	-3.00119		-10.815	low
TCGA-AB-2909	-0.670622	-3.23434	-0.0420454	-0.132747	1.99508	0.0790043	0.572989	-0.210895	0.0350948	-4.38909	-3.70958	-0.718165		-10.4253	low
TCGA-AB-2986	-0.44042	-0.562181	-0.627985	0.538338	-4.47107	0.455489	-0.816488	-0.1502	-0.0486619	-1.39688	-1.06493	-1.82838		-10.4134	low
TCGA-AB-3008	-0.230431	-0.528823	0.0979452	-0.288341	-1.02104	-1.01458	-0.602322	-0.492568	-0.0897439	-1.82629	-3.68064	-0.601478		-10.2783	low
TCGA-AB-2810	-0.909781	-0.721153	-0.373759	-0.494675	-2.90719	0.554529	-0.0673942	-0.397169	0.300767	-3.63962	-0.726936	-0.422641		-9.80503	low
TCGA-AB-2841	-0.0499494	-0.470443	0.352758	0.202718	-1.54562	-1.14972	0.193066	-0.280248	-0.0414178	-4.2784	-1.09641	-1.43344		-9.5971	low
TCGA-AB-2999	0.683113	-0.0891679	0.491579	-0.937518	-3.22213	-1.5814	-0.359391	-0.572533	0.534946	-2.88097	0.344188	-1.94978		-9.53906	low
TCGA-AB-3007	-0.0933639	-0.211492	-0.296916	-0.604751	-0.464238	-0.76321	-0.738528	-0.548834	-0.125816	-4.23714	-1.44575	0.29493		-9.23511	low
TCGA-AB-2811	-0.36579	0.179655	-1.20779	-0.398493	-3.27595	-0.865134	-1.19935	-0.60834	1.06463	1.77112	-1.91061	-2.38145		-9.19751	low
TCGA-AB-2858	-0.346446	-0.161035	0.289236	-0.661904	-3.43323	-1.38833	-0.557378	-0.315415	0.663918	-3.03205	0.533619	-0.383373		-8.79238	low
TCGA-AB-2875	-0.428675	-0.330459	0.13379	0.161571	-3.4251	-0.363753	-1.59499	0.664348	0.277013	-1.76521	-0.0749158	-1.78392		-8.53029	low
TCGA-AB-2966	-0.206051	0.0403972	0.438482	-3.04942	-2.76713	0.36606	-1.03938	0.582341	-0.0573698	-3.42556	-0.7568	1.34584		-8.5286	low
TCGA-AB-2964	-0.224546	0.504522	0.202701	-0.0607699	-3.22506	-0.36354	-0.671663	-0.0170777	-1.10925	-2.87594	-0.774225	0.122956		-8.4919	low
TCGA-AB-2972	-0.551395	-0.222397	-0.130979	0.173606	-4.63243	-0.00482529	-1.25668	0.59692	-0.557948	-2.67124	2.42605	-1.5784		-8.40971	low
TCGA-AB-2937	-0.657981	-1.09215	-0.45014	-0.782204	-2.99947	-0.220998	-0.443414	-1.3968	-1.32231	-3.65152	3.86818	1.43603		-7.71277	low
TCGA-AB-2822	0.14594	-0.743561	-0.00748059	-1.29898	0.292687	-0.283392	0.941965	-0.188069	-0.328343	-3.36277	-1.35969	-1.21114		-7.40284	low
TCGA-AB-2993	0.39844	-0.056445	0.0783595	-0.0246659	-4.16005	0.269076	-0.424695	-0.191131	-0.583829	-1.83202	0.692285	-1.37928		-7.21396	low
TCGA-AB-2903	0.431595	0.139277	0.243165	-0.0135465	-2.57312	0.211557	-1.02764	0.731576	-0.485799	-3.12507	-2.74583	1.06176		-7.15208	low
TCGA-AB-2877	0.0248001	-0.435566	0.32563	-2.19943	-1.297	0.287131	-1.24835	1.22127	-0.0819955	-3.4299	-0.148997	0.000648206		-6.98177	low
TCGA-AB-3012	0.0279867	-0.00352867	0.760144	-1.05504	-1.01177	-0.248871	0.25204	-0.541875	0.30336	-3.49666	-0.489853	-1.21497		-6.71904	low
TCGA-AB-2869	-0.475444	-0.0629086	-0.0696522	-0.00799227	-3.17184	0.505739	-0.487604	-0.281686	-0.644041	-2.16086	0.334936	-0.13005		-6.65141	low
TCGA-AB-2895	-0.282978	-0.289251	-0.389659	-0.234862	-3.06664	0.546927	-0.150166	-0.168099	-0.234306	-0.999878	-0.716464	-0.347459		-6.33284	low
TCGA-AB-2988	-0.607587	-0.214106	-0.0723026	0.434749	-3.35917	0.43214	-1.23245	0.58308	0.562316	-1.33582	0.170623	-1.5261		-6.16462	low
TCGA-AB-2913	0.00908152	0.174435	-0.152971	0.475078	-2.54539	0.616055	-0.373235	0.779613	0.019425	-5.06993	-0.150325	0.334685		-5.88348	low
TCGA-AB-2845	0.381849	-0.298866	0.14478	-0.697836	-0.383627	-2.28449	0.131722	-0.264815	0.276812	1.017	-1.87323	-1.74397		-5.59468	low
TCGA-AB-3000	-0.0684862	-0.738407	-0.32553	0.140391	0.141587	-1.61192	0.410906	-0.393197	0.00636203	0.77678	-2.0181	-1.77232		-5.45194	low
TCGA-AB-2874	0.0664717	-0.590988	-0.922981	-0.44153	0.12301	0.200452	0.21492	-0.33033	-0.234906	-1.65485	-0.625686	-1.10149		-5.2979	low
TCGA-AB-2918	-0.182477	-0.608614	0.0242578	-0.284265	1.00195	-0.278436	0.571048	-1.08122	0.395596	-0.218427	-1.94268	-2.52614		-5.12941	low
TCGA-AB-2839	-0.59819	0.00450588	0.0386076	0.951462	-0.135675	0.632081	0.0342593	0.744719	0.740914	-1.33583	-4.91668	-0.937625		-4.77745	low
TCGA-AB-3001	-0.237394	-0.0894637	0.701491	0.365887	-2.44957	-0.281118	0.362487	-0.179751	-0.532642	-0.879097	-0.319745	-0.850748		-4.38966	low
TCGA-AB-2990	1.02774	-0.16313	0.0881913	-0.559545	-2.02279	-0.0689822	-0.976507	0.0296759	-0.124561	-2.8321	2.51362	-1.21481		-4.3032	low
TCGA-AB-2967	-0.555829	0.138264	0.0451866	0.180816	-1.06137	0.111611	0.295601	-0.306493	-0.569929	1.69578	-2.90958	-1.22373		-4.15967	low
TCGA-AB-2991	-0.0387057	0.0545467	0.987231	0.256901	-0.558586	-0.870233	0.00509437	-0.0779685	0.154284	-2.54245	-0.464823	-1.04478		-4.13949	low
TCGA-AB-2994	0.433902	-0.312441	0.136499	-0.631781	0.771883	-0.530861	-0.0256277	-0.398036	-0.44002	-0.217764	-0.989572	-1.93439		-4.13821	low
TCGA-AB-2944	-0.0643723	-0.0841346	-1.33738	-0.327479	-0.393382	0.165451	-0.466574	0.611094	0.46018	-1.42365	-2.79285	1.55704		-4.09605	low
TCGA-AB-2943	-0.731567	-0.256189	-0.363714	-0.379977	-0.853774	0.457313	-1.09325	-0.1035	0.194943	-0.217142	0.552362	-1.14823		-3.94272	low
TCGA-AB-2920	-1.82885	-1.12763	-2.07912	-0.895244	1.4942	0.756988	-1.77136	-0.364102	-0.254594	-2.03672	1.46324	2.91532		-3.72787	low
TCGA-AB-2816	0.88551	-0.553136	-0.315168	-0.0903112	1.62588	-2.18188	0.556968	-0.414733	-0.583839	3.04771	-3.18042	-2.51501		-3.71843	low
TCGA-AB-2806	-0.813301	0.0105488	0.553954	0.0779251	1.09053	-2.86624	0.285954	0.078976	1.0265	-3.9665	-0.55312	1.43656		-3.63821	low
TCGA-AB-2856	-0.975579	-0.658276	-0.38598	-0.385307	0.176774	-0.232468	0.230141	-0.188087	-0.423633	-0.100142	-0.23185	-0.396527		-3.57093	low
TCGA-AB-2867	0.269653	-0.548685	0.202753	-0.42353	-1.35613	-1.7999	0.639206	0.0745976	0.438202	1.30555	-0.344405	-1.94534		-3.48803	low
TCGA-AB-2812	-0.0573427	0.652873	0.366918	0.596319	-3.32773	0.431922	-0.405217	-0.612932	0.226157	-1.2991	-0.812575	0.833909		-3.4068	low
TCGA-AB-2977	-0.663071	-0.594133	-1.18019	0.389801	0.629406	-0.128912	0.437233	0.012486	-0.232572	0.490445	0.114838	-2.63369		-3.35836	low
TCGA-AB-2879	-0.207635	-0.25185	0.0987664	-0.506456	-1.8043	0.388897	-1.84913	-0.00260487	-0.929261	-2.80247	2.65233	1.87317		-3.34055	low
TCGA-AB-2887	-0.906518	0.300738	-1.23981	-0.969093	1.0323	0.272902	-1.58332	0.652151	-0.488283	-1.79373	-0.160593	1.67043		-3.21282	low
TCGA-AB-2930	0.0230332	0.0618117	-0.0965409	-0.0740433	-0.00866254	-0.537192	0.221207	-0.230015	0.321815	-1.14583	-1.79442	0.058472		-3.20036	low
TCGA-AB-2982	0.500677	-0.0975402	0.623012	-0.435306	-0.939489	-1.01399	-0.326744	-0.119954	0.488414	-2.05362	1.1247	-0.467921		-2.71776	low
TCGA-AB-2911	0.408097	-0.248687	-0.553204	-0.59395	-0.0258339	0.092469	-0.229417	-0.8643	-1.27921	2.36487	-0.0769045	-1.64771		-2.65378	low
TCGA-AB-2921	0.426625	0.0931502	-0.03215	0.00881299	-0.217928	-0.373206	0.594479	-0.310089	0.358267	0.503103	-1.31148	-2.38305		-2.64346	low
TCGA-AB-2889	0.420309	-0.611526	0.155381	-0.0480321	-0.0768471	-0.339502	0.205292	-0.114592	-0.517264	2.4644	-2.22555	-1.78256		-2.47049	low
TCGA-AB-2840	0.779961	-0.562032	0.433628	-0.786328	0.0328933	-0.204021	-0.00941741	-1.26225	0.610344	-0.338501	0.752524	-1.75825		-2.31145	low
TCGA-AB-2946	0.742378	-1.08779	0.0409045	-0.709631	-0.827443	-0.595839	0.0563707	-0.903887	0.522411	1.88481	0.0506388	-1.29991		-2.12698	low
TCGA-AB-2830	0.0321589	-0.458894	-0.240988	-0.432969	-0.091314	0.120686	0.478496	-0.475342	-0.0635024	-0.817889	1.07113	-1.23664		-2.11507	low
TCGA-AB-2914	-0.0817976	-0.414939	0.192546	1.18156	-0.132546	-0.551399	-0.380946	0.533154	0.0329989	1.55373	-2.62718	-1.41864		-2.11345	low
TCGA-AB-2884	-0.404059	0.298683	-0.393919	-1.06025	0.487897	-1.07127	0.175619	-0.716096	-0.145341	2.89167	0.688152	-2.68827		-1.93719	low
TCGA-AB-2952	-1.25904	-0.668227	-1.61427	-1.21652	1.47311	0.111587	-1.23825	-0.283836	-0.60303	2.12756	0.397329	1.04197		-1.73162	low
TCGA-AB-2976	-0.0446434	0.412248	-0.139326	0.608821	-2.98728	1.28814	-0.20026	0.435788	1.00135	-0.289233	-2.94878	1.26899		-1.59418	low
TCGA-AB-2885	-1.55908	-0.133301	-0.986124	-0.605712	1.91361	0.695356	-2.04444	0.56131	0.283952	0	-1.29471	1.69158		-1.47756	low
TCGA-AB-2844	0.0234514	0.0599991	0.0765003	-0.0691919	-2.34653	0.458287	-0.41235	-0.133448	0.0356327	2.08917	-0.949377	-0.301441		-1.4693	low
TCGA-AB-2936	0.101099	-0.276116	-0.826202	-0.285911	-0.803088	-0.699243	1.32973	0.179272	-0.687352	-1.07252	2.03152	-0.407343		-1.41616	low
TCGA-AB-2975	0.632285	-0.274589	0.0149909	0.533502	-0.951402	-0.434282	-0.391027	0.229433	-0.00837617	-2.3223	2.40369	-0.831382		-1.39946	low
TCGA-AB-2900	0.0580202	0.531488	-0.323516	-0.598551	-0.451617	-0.57883	0.58533	-0.956844	-0.414227	2.78174	-0.492474	-1.45083		-1.31032	low
TCGA-AB-2898	-0.105437	-0.118405	-0.440714	-0.309069	0	0.0443182	-0.965348	0.447084	-0.0671802	-1.27776	0.301432	1.26873		-1.22235	low
TCGA-AB-2842	-0.184569	0.357368	0.595186	0.496792	-0.974978	-0.203305	0.484463	-0.0638444	0.158338	1.53997	-1.70958	-1.59672		-1.10088	low
TCGA-AB-2995	-0.355412	-0.304924	-0.125993	-0.340443	-0.439287	0.322899	-1.16709	-0.00145142	-0.867878	-1.41189	1.7791	1.86288		-1.04948	low
TCGA-AB-2927	0	0.12647	-0.670133	-0.289924	0.427537	-0.959238	0.353018	-0.161127	0.197027	1.17464	-0.241007	-0.889636		-0.932372	low
TCGA-AB-2954	-0.0903231	-0.733242	-0.178382	0.132564	1.63611	-0.301586	0.00983557	-0.20669	-0.639224	2.58341	-3.16787	0.0582408		-0.89716	low
TCGA-AB-2882	0.11663	-0.481355	-0.706896	-0.885576	-1.19154	0	-0.347354	0.054437	-0.225737	0.833347	1.02211	0.965384		-0.846543	low
TCGA-AB-2819	-0.399624	0.582916	0.689423	1.11694	-1.7848	-0.958401	-2.48269	0.751412	0.790415	-0.545045	0.666035	0.866061		-0.70736	low
TCGA-AB-2881	0.521307	-0.431666	0.0535922	0.184464	-0.498425	0.0468459	1.31668	0.249146	-0.095617	1.43304	-1.21772	-2.14245		-0.580804	low
TCGA-AB-2939	-1.14325	0.0977953	-0.567514	-0.121311	0.431431	-0.339787	1.32741	-0.245453	0.509783	-1.28136	-0.035204	0.840758		-0.526702	low
TCGA-AB-2971	-0.0480344	-0.426802	0.072917	-0.656438	0.748471	-0.804749	0.8567	-0.350226	-0.48241	2.08773	0	-1.45997		-0.462815	low
TCGA-AB-2950	0.0122438	0.203914	0.465125	-0.107415	-0.280396	-0.650014	-2.20185	0.0122699	-0.0204051	-1.21324	2.78855	0.73639		-0.254827	low
TCGA-AB-2814	-0.411745	-0.018022	-0.0548272	0.281129	1.50452	-1.5389	0.90432	-0.141621	-0.0443714	0.0536336	-1.45581	0.711472		-0.210226	low
TCGA-AB-3002	-0.304858	-0.374891	0.209652	-0.513568	0.35445	0.123546	0.496787	-0.213373	-0.0139881	-0.323942	0.240485	0.172131		-0.147571	low
TCGA-AB-2820	-0.54091	-0.501982	-1.01227	0.455202	1.30295	0.318845	-2.73169	0.231129	0.209192	0.329237	1.60623	0.202392		-0.131672	low
TCGA-AB-2848	0.365565	-0.158932	-0.742888	0.469179	-1.16438	0.0137246	0.7681	0.413124	-0.0980405	1.5345	-0.751645	-0.761157		-0.11285	high
TCGA-AB-2931	-0.206409	0.00219216	0.136035	0.257362	-0.758421	0.372329	0.0856886	0.226816	-0.32406	-1.42089	0.711522	0.837337		-0.0805035	high
TCGA-AB-2846	0.076033	-0.424552	0.34301	-0.129292	-0.000788863	-0.19065	0.841058	-0.0521492	-0.303277	2.90286	-0.75118	-2.21917		0.0919031	high
TCGA-AB-2904	-1.34601	-0.390444	-0.156681	-0.0373779	-0.0125026	1.08766	0.379893	0.207363	0.381112	-1.3851	0.0147043	1.50113		0.243741	high
TCGA-AB-2823	0.20452	0.10236	1.08551	0.392308	1.68825	-0.095575	0.22497	0.274289	0.25877	-1.77695	-1.89837	-0.0997372		0.360347	high
TCGA-AB-2880	0.119352	-0.520715	-0.0537272	0.572472	0.614507	-0.468999	0.075314	0.157984	0.366106	1.32844	-0.151808	-1.64079		0.398141	high
TCGA-AB-2824	-1.0754	0.343771	0.0648196	-0.154895	-1.62379	1.04311	-1.03158	-0.465786	-0.392089	0.748261	2.00474	0.962313		0.423465	high
TCGA-AB-2980	-0.0618133	0.356147	1.31392	0	-0.519193	-0.121171	-0.210139	0.0075725	0.742042	-2.72341	1.2997	0.346775		0.430426	high
TCGA-AB-2817	-0.541653	0.43685	-1.33643	-0.678544	0.946854	-0.335147	-0.108801	0.319786	-0.143575	1.0878	-0.404073	1.2823		0.525368	high
TCGA-AB-2928	-0.467523	0.00850868	-1.07869	0.387127	1.02606	1.1929	-0.262713	2.27705	0.720127	-3.96772	-2.34626	3.07258		0.561452	high
TCGA-AB-2908	-1.08235	-0.336534	0.0511238	0.0276509	0.178035	-0.588194	-0.811687	-0.277018	0.424752	-0.62087	1.94179	1.67552		0.582224	high
TCGA-AB-2851	0.177854	-0.109923	-0.564794	4.40133e-05	1.09242	-0.290205	0.838099	-0.343582	0.0204456	2.91153	-1.49456	-1.60088		0.636446	high
TCGA-AB-2835	-0.139849	0	0.102976	0.0159774	0.492551	-0.202594	1.12487	-0.110311	-0.143903	1.33814	-1.01259	-0.778823		0.686443	high
TCGA-AB-3009	-0.101833	0.275308	0.37358	0.402767	1.06135	-0.848501	-0.531494	0.393102	-0.197722	-1.80044	-0.532211	2.19767		0.69158	high
TCGA-AB-2821	-0.0299028	-0.335533	-0.250201	0.0254666	-0.12507	-0.290708	0.186035	-0.130087	-0.643666	0.952287	1.57685	0.0528815		0.988351	high
TCGA-AB-2924	0.422676	0.376568	-0.00545836	-0.188145	-2.55459	-0.33285	1.67965	0.173569	-0.80294	2.57207	0.325792	-0.667134		0.999212	high
TCGA-AB-2890	0.153968	-0.186597	-0.865697	-0.196973	0.47422	-0.424547	0.431882	-0.0178612	0.225198	0.905438	0.753169	-0.03476		1.21744	high
TCGA-AB-2818	0.906275	0.243657	0.0711991	0.0491582	-1.41164	-0.743246	0.931137	0.356234	-0.0100345	2.17824	-0.467154	-0.848895		1.25493	high
TCGA-AB-2959	0.233821	0.715328	-0.720844	0.336916	-0.435673	0.170472	1.15743	0.341856	-0.384389	-1.70998	-0.00331942	1.55793		1.25955	high
TCGA-AB-2870	0.184627	-0.633977	-0.0387509	0.0817441	1.71411	0.0433913	0.13961	0.272839	-0.504925	2.27974	-1.03762	-1.23473		1.26607	high
TCGA-AB-2896	-0.566026	-0.16223	-0.00149103	0.36296	-0.0848838	1.0984	0.535765	0.263452	0.452219	-0.305799	-0.727137	0.418523		1.28375	high
TCGA-AB-2859	-0.0252731	0.0533919	0.37762	0.872394	-3.2369	0.454518	0.542702	0.840277	0.156534	-0.260458	1.18574	0.342882		1.30343	high
TCGA-AB-2929	-0.378855	0.297228	-1.30766	-0.108194	0.770923	0.25133	-0.278591	0.649517	0.205048	0.310191	-0.82338	1.71676		1.30431	high
TCGA-AB-2925	-0.633623	0.366428	0.223185	-0.535648	0.0684973	0.165536	0.451531	-0.834543	-0.569315	0.356463	1.9078	0.38828		1.35459	high
TCGA-AB-2983	-0.322575	0.566199	-0.0523369	0.089318	0.973325	-0.22636	0.486383	0.0760852	-0.157059	1.66753	-0.71231	-0.999609		1.38859	high
TCGA-AB-2934	0.0176204	-0.265657	-0.648484	0.00382027	1.14814	-0.193356	0.554239	0.0136871	0.0204235	2.56138	-1.20874	-0.60385		1.39922	high
TCGA-AB-2853	-0.283522	0.403487	0.340973	1.39185	-4.34661	0.753978	0.150064	1.55609	0.73505	-0.14204	0.787354	0.158728		1.50541	high
TCGA-AB-2857	-0.541261	0.448896	-0.31044	-0.286503	-1.29543	0.610651	-1.70923	0.43449	1.1895	-1.20185	1.84162	2.40477		1.58521	high
TCGA-AB-2855	0.586003	0.643682	0.153297	0.87192	1.50733	0.93542	-0.468131	0.826616	-0.588746	-3.01326	-1.38103	1.70761		1.78072	high
TCGA-AB-2942	0.492772	-0.472859	-0.0597231	0.523221	0.282261	0.0208016	1.05517	0.420573	0.059617	2.27429	-1.38817	-1.3602		1.84775	high
TCGA-AB-2940	0.229265	0.00676813	0.0462316	0.487463	0.383393	0.191807	-1.95628	0.157994	0.244259	1.53801	0.125488	0.446499		1.90089	high
TCGA-AB-2917	-0.135682	1.09731	-0.245084	0.223791	0.424288	0.0035685	-1.9055	0.943985	0.828152	0.586158	-1.62827	1.75124		1.94396	high
TCGA-AB-2849	0.403187	0.824642	0.306083	-2.31108	-0.0185613	0.516655	-2.12039	1.17326	-0.31821	0.5155	0.456436	3.39567		2.8232	high
TCGA-AB-2868	-0.567497	-0.0105906	0.096078	0.639747	-0.170657	-0.582246	-2.49985	0.131964	0.65669	-0.440098	2.86011	2.82204		2.93568	high
TCGA-AB-2941	0.419028	0.218229	-0.000683937	1.63388	0.129038	1.53005	-3.65606	2.68248	0.267847	-1.0607	-0.313712	1.50172		3.35111	high
TCGA-AB-2899	0.193485	0.531256	-0.363888	-0.0573338	0.185059	0.137964	-0.483683	0.253332	0.348996	2.44428	-0.0635943	0.44725		3.57312	high
TCGA-AB-2932	-0.0516537	0.0468287	0.114985	-0.361356	0.833287	0.271677	1.24308	-0.453164	-0.323601	3.36593	-0.100559	-0.860046		3.7254	high
TCGA-AB-2834	0.399233	0.595311	0.141067	-0.0743936	-0.211715	0.0809963	-0.122093	0.656855	-0.0170316	2.39104	-0.558245	0.497865		3.77889	high
TCGA-AB-2956	-0.356172	-0.0142937	0.568223	0.254118	1.07706	0.28063	-0.699523	-0.137074	0.151257	0.659714	3.19303	-1.13861		3.83837	high
TCGA-AB-2832	-0.425764	0.0445266	-0.347947	0.872108	1.29565	-1.30224	-0.405362	0.374406	1.03901	-2.59158	3.61524	1.73735		3.9054	high
TCGA-AB-2949	-0.357437	-0.0511378	-0.132369	0.191765	0.581358	0.1868	-0.296341	0.51429	0.782246	-0.436876	1.54417	1.43935		3.96582	high
TCGA-AB-2998	0.161341	0.219192	0.885423	-1.08764	1.28048	-0.154841	0.616075	-0.624534	0.876664	-0.109917	2.93647	-0.798582		4.20013	high
TCGA-AB-2866	0.132272	0.050994	-0.328425	0.710912	1.63382	-0.932511	1.01351	0.887227	-0.195566	0.40848	0.0870717	0.74558		4.21336	high
TCGA-AB-2807	-0.491371	0.252376	0.423648	0.138016	0.996765	0.134674	0.756015	0.360879	-0.290718	0.808783	-0.326536	1.68415		4.44668	high
TCGA-AB-2963	0.265758	0.804044	0.365699	0.730006	-3.41703	0.425681	-0.210191	0.248036	0.271127	2.02484	2.85109	0.144145		4.5032	high
TCGA-AB-2837	0.657535	0.26199	-0.351076	0.163644	1.8134	-0.665375	0.636628	-0.102246	-0.422386	3.60575	1.23252	-2.32083		4.50956	high
TCGA-AB-2970	0.159105	1.04809	0	0.119011	1.63499	-0.217164	0.313598	-0.020767	-0.0378119	3.0766	-0.222647	-1.20466		4.64833	high
TCGA-AB-2808	0.00973194	0.491498	0.343401	0.636596	-0.0143231	-0.0352324	0	0.224945	0.806239	1.43027	-0.664701	1.466		4.69443	high
TCGA-AB-2938	-0.991972	0.0480635	0.573725	0.0216276	-0.760732	1.17121	-2.97283	0.68966	-0.378398	0.447208	4.82469	2.0434		4.71565	high
TCGA-AB-2992	0.149941	0.123556	0.128748	-0.785111	1.134	-0.119821	-0.150372	-0.403537	-0.378754	2.35688	2.35561	0.304506		4.71565	high
TCGA-AB-2863	0.574436	-0.313154	0.364342	0.347926	-0.333251	0.177424	0.423554	-0.0200508	-0.309926	-1.33849	4.95377	0.233882		4.76046	high
TCGA-AB-2978	-0.606219	0.29638	0.293916	0.504251	0.318426	-0.170568	-0.876884	-0.454212	0.020894	1.76883	2.9925	0.810112		4.89742	high
TCGA-AB-2973	0.161808	0.605276	-0.139346	0.276548	1.20873	-0.476744	1.17403	0.0606752	0.510718	3.40416	0.240681	-1.85583		5.1707	high
TCGA-AB-2948	0.27407	0.113704	-0.20149	-0.684779	1.31701	-0.20946	0.771493	-0.469826	-0.855165	2.63814	2.574	0.150404		5.4181	high
TCGA-AB-2843	-0.0304218	-0.0401595	-0.389714	0.456963	0.556368	0.068572	-0.0926005	0	-0.629791	0.740748	3.50291	1.39552		5.53839	high
TCGA-AB-2836	0.75719	0.0527331	-0.483307	0.359997	0.991461	0.362413	0.700147	0.21191	-0.256353	2.72671	0.134944	0.240153		5.798	high
TCGA-AB-2888	0.688299	-0.158133	0.0349884	0.116235	1.35881	-0.121288	1.19146	0.309351	0.702691	3.86793	0.0429053	-2.1303		5.90295	high
TCGA-AB-2916	0.69825	0.388324	-0.135185	-0.0755507	-0.918629	0.67608	1.41326	-0.479932	0.177952	4.35888	-0.22427	0.1124		5.99158	high
TCGA-AB-2915	0.261621	0.151952	-1.28884	-0.343625	0.248442	0.361733	1.46658	0.149576	0.446732	1.97139	1.11278	1.50064		6.03899	high
TCGA-AB-2826	0.0299903	0.340704	0.477046	0.528548	1.17369	-0.460189	0.287729	0.173524	0	2.63962	2.2612	-1.40014		6.05172	high
TCGA-AB-3005	-0.897364	0.885482	0.438067	0.925636	1.11503	0.408199	-1.51622	0.580834	1.27546	-1.07095	1.97419	1.98		6.09836	high
TCGA-AB-2854	0.76245	0.172745	-0.524022	0.0459211	0.165879	0.332829	0.0923402	0.113379	0.732029	2.47803	1.61074	0.464263		6.44658	high
TCGA-AB-2873	0.144408	0.780301	-0.103538	-0.598169	1.11107	-0.770429	0.648617	-0.859116	0.620765	4.12525	2.97314	-1.58893		6.48338	high
TCGA-AB-2996	0.812603	-0.297395	0.0792396	-0.0956716	0.207676	0.406487	0.574564	-0.0857153	-0.623529	2.64364	2.11092	0.971594		6.70442	high
TCGA-AB-2935	0.486512	-0.141142	0.178755	-0.102125	0.466304	-1.02708	-0.364343	-0.108706	0.19482	1.66494	4.70834	0.780058		6.73633	high
TCGA-AB-2861	-0.0331588	-0.23977	0.118693	0.859627	0.198254	0.367722	0.399569	0.309993	0.292497	-1.28213	4.74225	1.4759		7.20944	high
TCGA-AB-2815	0.762056	0.407856	0.617096	0.372741	1.55006	0.768712	1.24718	0.323357	-0.0305045	4.13138	-1.48032	-1.27178		7.39783	high
TCGA-AB-2828	0.468307	0.64518	0.573821	0.486088	1.54623	-0.243159	0.689858	0.521711	-0.327933	4.03942	1.10114	-1.61888		7.88178	high
TCGA-AB-2965	0.249685	0.839159	0.763426	0.73493	0.302832	0.892376	1.0842	0.117524	0.604295	1.88482	-0.0240204	0.500069		7.9493	high
TCGA-AB-2987	0.710651	0.733522	0.0521795	-0.117792	2.22614	-2.11175	0.536335	-0.626936	1.12	3.99809	1.11404	0.707601		8.34208	high
TCGA-AB-2847	0.469408	0.364653	-0.911258	0.118668	-0.212302	0.861479	-0.45155	0.391531	0.0815631	-0.195495	4.79943	3.10531		8.42143	high
TCGA-AB-2838	-0.359532	0.0289267	-0.835567	-0.108966	0.585408	0.905062	-0.944676	0.639019	0.756857	2.04017	3.34548	2.80958		8.86176	high
TCGA-AB-2969	-0.494946	0.0957335	0.268092	0.158552	1.43593	0.218495	1.15175	-0.439594	-0.286023	1.90719	4.99968	0		9.01486	high
TCGA-AB-2813	-0.372534	0.315968	0.200019	0.277915	1.84962	-0.193193	-0.34131	0.102642	0.882718	3.77934	1.69211	1.00453		9.19783	high
TCGA-AB-2981	0.590168	0.521095	-0.290607	0.727792	2.03861	0.419357	1.10415	0.525107	0.811047	3.8229	-0.18272	-0.552089		9.53481	high
TCGA-AB-2933	-0.106687	1.01948	-0.277631	0.653295	1.45664	0.303354	-0.103883	0.366533	-0.00756392	2.90438	1.69983	1.78795		9.6957	high
TCGA-AB-2910	-0.761167	0.041451	0.510809	0.320549	1.57127	1.41058	-2.24686	0.704899	0.651112	-0.00830747	4.59947	3.06347		9.85728	high
TCGA-AB-2901	0.514487	0.0364673	0.442589	1.19708	2.31334	1.42768	-3.31325	1.33424	0.904225	-1.73477	2.97735	4.10411		10.2036	high
TCGA-AB-2985	0.0919892	0.4795	0.395926	0.586578	1.56482	0.825485	-0.46635	-0.391722	0.607898	3.0024	2.7217	0.841083		10.2593	high
TCGA-AB-2865	0.0501021	0.0540314	-0.477421	1.32684	1.00542	1.16483	-0.57501	1.41384	0.404981	2.24322	0.0858923	3.69835		10.3951	high
TCGA-AB-2891	0.309615	0.262164	0.0292339	0.84686	1.78945	0.14312	0.443907	0.708229	1.20421	1.92574	1.82161	1.16695		10.6511	high
TCGA-AB-2805	0.227493	0.97671	-0.690498	1.15864	2.52699	0.554046	1.07965	1.41182	-0.2374	3.60483	-0.895654	0.95464		10.6713	high
TCGA-AB-2912	0.540141	0.756514	0.944763	0.541163	2.03138	0.439836	0.528525	-0.105447	-0.0856671	3.45065	3.34014	-1.03697		11.345	high
TCGA-AB-2825	-0.345434	0.701623	0.0300202	0.895922	2.39595	0.570208	0.475807	0.399107	0.361974	3.53791	2.41704	0.523612		11.9637	high
TCGA-AB-2833	0.0312059	0.709555	-0.339581	1.27811	1.44171	0.959245	0.460437	0.591316	0.295402	3.91165	2.59814	0.936028		12.8732	high
TCGA-AB-2860	0.198045	0.50001	1.09985	1.09801	0.770543	0.623962	-0.80551	0.853076	1.13881	2.18881	4.03903	2.64324		14.3479	high

## Sheet: TCGA_RNAseq
Supplementary Table S5B: Gene expression data of TCGA-LAML
	TCGA-AB-2897-03A-01T-0735-13	TCGA-AB-2862-03A-01T-0736-13	TCGA-AB-3011-03A-01T-0736-13	TCGA-AB-2872-03A-01T-0735-13	TCGA-AB-2955-03A-01T-0734-13	TCGA-AB-2803-03A-01T-0734-13	TCGA-AB-3006-03A-01T-0736-13	TCGA-AB-2919-03A-01T-0740-13	TCGA-AB-2886-03A-01T-0735-13	TCGA-AB-2979-03B-01T-0760-13	TCGA-AB-2871-03A-01T-0735-13	TCGA-AB-2984-03A-01T-0734-13	TCGA-AB-2909-03A-01T-0744-13	TCGA-AB-2986-03A-01T-0734-13	TCGA-AB-3008-03A-01T-0736-13	TCGA-AB-2810-03A-01T-0736-13	TCGA-AB-2841-03B-01T-0760-13	TCGA-AB-2999-03B-01T-0748-13	TCGA-AB-3007-03A-01T-0736-13	TCGA-AB-2811-03B-01T-0760-13	TCGA-AB-2858-03A-01T-0736-13	TCGA-AB-2875-03A-01T-0735-13	TCGA-AB-2966-03A-01T-0734-13	TCGA-AB-2964-03A-01T-0734-13	TCGA-AB-2972-03A-01T-0734-13	TCGA-AB-2937-03A-01T-0734-13	TCGA-AB-2822-03A-01T-0734-13	TCGA-AB-2993-03A-01T-0735-13	TCGA-AB-2903-03A-01T-0734-13	TCGA-AB-2877-03A-01T-0735-13	TCGA-AB-3012-03A-01T-0736-13	TCGA-AB-2869-03A-01T-0735-13	TCGA-AB-2895-03A-01T-0735-13	TCGA-AB-2988-03B-01T-0748-13	TCGA-AB-2913-03A-01T-0734-13	TCGA-AB-2845-03B-01T-0748-13	TCGA-AB-3000-03A-01T-0736-13	TCGA-AB-2874-03A-01T-0735-13	TCGA-AB-2918-03A-01T-0740-13	TCGA-AB-2839-03A-01T-0734-13	TCGA-AB-3001-03A-01T-0736-13	TCGA-AB-2990-03B-01T-0748-13	TCGA-AB-2967-03A-01T-0734-13	TCGA-AB-2991-03A-01T-0735-13	TCGA-AB-2994-03A-01T-0735-13	TCGA-AB-2944-03A-01T-0740-13	TCGA-AB-2943-03A-01T-0740-13	TCGA-AB-2920-03B-01T-0760-13	TCGA-AB-2816-03A-01T-0734-13
KRADS12 Score	-19.5712	-17.0417	-15.4125	-14.2193	-13.9966	-13.3842	-13.328	-12.5899	-12.5466	-12.2093	-11.5471	-10.815	-10.4253	-10.4134	-10.2783	-9.80503	-9.5971	-9.53906	-9.23511	-9.19751	-8.79238	-8.53029	-8.5286	-8.4919	-8.40971	-7.71277	-7.40284	-7.21396	-7.15208	-6.98177	-6.71904	-6.65141	-6.33284	-6.16462	-5.88348	-5.59468	-5.45194	-5.2979	-5.12941	-4.77745	-4.38966	-4.3032	-4.15967	-4.13949	-4.13821	-4.09605	-3.94272	-3.72787	-3.71843
KRADS12	low	low	low	low	low	low	low	low	low	low	low	low	low	low	low	low	low	low	low	low	low	low	low	low	low	low	low	low	low	low	low	low	low	low	low	low	low	low	low	low	low	low	low	low	low	low	low	low	low
A1BG	304.092	393.798	204.21	296.668	81.2865	412.428	94.9074	275.651	260.704	286.294	246.745	466.195	143.592	668.229	140.564	250.772	337.827	731.361	334.256	168.084	243.683	172.869	110.452	57.0846	15.8198	240.226	293.216	162.795	291.14	188.566	294.432	74.4409	176.658	95.5245	253.85	194.263	213.343	179.219	160.476	231.333	321.371	129.578	346.903	266.078	286.341	203.577	123.251	226.591	195.192
A2LD1	50.0451	55.0504	31.0281	56.5076	21.9298	71.4095	42.4374	38.4324	38.6945	26.8395	300.327	41.7143	135.743	63.1979	34.4324	25.4511	51.4748	38.1266	63.168	38.1594	79.6215	78.3448	34.9764	85.0561	60.6036	77.3786	34.0976	118.371	46.0331	15.4717	30.8752	84.4409	121.689	57.117	71.2144	46.7229	31.5638	28.0813	54.1682	66.303	36.8571	10.5004	83.5267	32.5206	27.6388	35.2151	51.9809	52.4326	83.7212
A2M	156.708	10.0055	22.7273	344.442	13.1579	467.078	93.2187	14.5386	6.7993	84.8681	40.3536	12.987	0	0	786.465	2.6333	6.4748	111.691	9.6	4.2804	33.123	11.7241	5.8036	118.247	11.7117	7.5512	43.1119	62.465	2.924	4.717	527.933	8.0451	9.7259	18.1132	26.7763	84.3608	39.8637	2.6761	34.0136	6.0693	180	8.6005	252.9	229.369	9.4073	32.4528	42.3867	66.2782	0
A2ML1	10.1466	3.0017	2.1645	8.5311	10.2339	2.0576	3.8204	6.9532	2.7197	1.7681	7.8953	0	5.3303	2.0833	4.7587	5.2667	7.1942	1.6598	3.2	0.535	5.5205	2.069	3.8691	9.1743	7.2072	1.0787	5.487	7.3488	14.6199	2.8302	1.8622	20.1126	12.3784	6.0377	0	2.5957	29.4118	11.5965	3.0921	12.987	0.9524	0.7819	5.8005	0	2.8222	16.6038	9.4193	10.1966	0
A4GALT	16.9109	56.031	28.1385	61.8502	7.3099	11.3169	55.7784	10.1138	1.3599	548.696	71.0575	35.0649	0	32.2917	165.874	14.4833	0	23.2378	266.4	0.535	4.7319	17.931	6.7709	163.099	179.279	303.128	12.5416	5.5116	0	0	15.8287	223.653	128.205	146.415	38.5579	55.8079	20.8034	8.0283	11.1317	2.5974	115.238	23.4558	70.7657	22.9369	51.7404	4.5283	51.806	8.74	0
AAAS	677.565	1051.58	793.29	713.41	538.012	514.403	677.746	941.846	743.158	1401.5	654.431	2225.97	619.649	679.167	802.175	886.115	1007.19	641.53	779.2	1479.4	850.946	833.793	603.575	807.339	872.072	1360.3	609.837	665.068	757.31	716.038	745.81	756.235	738.285	738.868	525.887	725.503	814.204	649.403	1012.37	570.563	619.048	996.091	569.606	688.108	715.898	861.887	787.855	1487.98	484.615
AACS	333.709	349.193	431.818	105.572	141.813	190.329	220.821	725.664	175.421	165.021	207.909	246.753	374.454	208.333	367.097	646.482	253.957	368.485	809.6	246.121	141.167	256.552	204.094	122.324	227.928	179.072	193.612	303.139	417.154	811.321	582.868	355.591	358.974	258.868	363.087	271.252	244.62	280.992	110.08	359.307	499.048	440.969	377.03	266.268	385.701	380.377	148.69	479.243	161.538
AADAT	1.1274	2.0011	2.1645	1.0664	1.462	0	6.8768	0.6321	233.894	3.5362	39.4764	1.2987	290.502	0	46.9069	50.0332	0	0.8299	0	2.6752	11.041	244.138	194.421	0	52.2523	61.4887	518.127	17.4534	36.0624	0.9434	5.5866	0.8045	30.9461	138.868	1.0711	5.1914	1.4347	16.0567	1.2369	93.5065	4.7619	14.0735	0	1.9945	0	56.6038	100.921	300.801	17.3077
AAGAB	537.768	495.274	422.078	377.499	685.673	492.798	725.119	625.79	400.476	457.345	645.658	231.169	376.453	1064.58	532.971	759.715	410.791	723.692	442.4	988.229	468.454	413.103	728.352	662.589	924.324	134.844	491.476	701.812	879.142	1007.55	343.575	593.725	558.798	947.17	629.78	696.301	517.217	517.381	672.232	736.797	438.095	904.613	662.413	556.47	628.41	369.057	630.418	261.471	715.385
AAK1	9543.4	4451.46	3116.88	6828.05	5114.04	6942.39	2315.19	2520.86	2209.76	2705.17	4018.69	1451.95	1934.9	1445.83	3097.89	3961.84	5290.65	7179.66	5168	1711.61	2342.27	2493.79	4706.72	2424.06	2470.27	2448.76	1499.51	5559.38	6440.55	12777.4	6512.1	4129.53	4127.32	1907.17	2640.15	2878	3314.92	3367.44	2209.65	2893.51	6805.71	4544.18	6300.46	6773.37	5949.2	3107.92	3335.77	904.588	3845.19
AAMP	1009.02	856.473	721.861	778.459	536.55	851.852	902.388	969.659	941.016	1297.19	832.513	1163.64	606.989	1177.08	926.581	1050.7	912.23	847.35	929.6	1231.14	870.663	859.31	504.914	743.119	842.342	1139.16	587.889	747.742	715.4	818.868	825.885	806.919	707.339	847.547	653.343	1129.14	992.826	633.346	1060.61	654.545	822.857	913.213	803.944	907.504	657.573	914.717	822.84	1364.17	684.615
AANAT	6.7644	1.0006	4.329	9.5974	1.462	3.0864	2.2923	1.2642	1.3599	6.483	5.2635	0	3.3314	0	4.0789	5.2667	2.8777	2.4898	0.8	2.6752	1.5773	1.3793	1.9345	1.0194	1.8018	3.2362	3.1354	0.9186	0.9747	1.8868	0.9311	3.218	0.8842	2.2642	9.6395	7.1382	9.3257	4.4602	5.5659	3.4632	3.8095	1.5637	11.6009	2.9918	1.8815	2.2642	4.7096	4.37	10.5769
AARS	966.178	2249.24	1593.07	1376.7	866.959	1030.86	1314.23	1577.75	1243.58	1713.86	1332.55	383.117	1196.66	1283.33	2021.07	1701.13	1683.45	1539.51	2124.8	498.127	1213.72	1433.79	2218.91	1465.85	1486.49	922.33	1245.54	1596.53	1371.35	1182.08	1689.01	1506.03	1441.2	1380.38	1060.34	1446.46	1645.62	1533.41	1632.03	1096.1	2096.19	1805.32	1143.85	1520.82	1374.41	1381.13	2069.55	2024.04	533.654
AARS2	518.264	563.311	642.576	643.786	269.006	504.846	675.446	707.756	525.453	674.148	636.008	157.143	421.095	396.875	655.806	408.074	476.108	510.02	568.576	373.462	484.227	683.331	394.645	404.689	500.901	429.342	541.642	667.558	417.154	634.906	417.868	598.383	618.444	576.604	457.34	576.132	556.664	621.58	592.096	387.013	553.143	564.504	371.23	431.553	477.893	489.721	492.493	1124.54	231.731
AARSD1	558.061	508.281	310.606	434.018	280.702	655.35	391.977	383.692	334.523	389.568	377.219	161.039	267.848	560.417	314.072	491.116	309.353	463.096	473.6	485.821	452.681	422.069	236.981	400.612	407.207	253.506	268.861	350.906	213.45	383.962	405.959	361.223	300.619	347.17	311.677	528.228	337.159	291.696	281.385	266.667	385.714	447.224	207.657	353.029	218.25	382.642	394.937	259.286	123.077
AASDH	366.404	455.252	534.632	686.75	758.772	306.584	774.785	554.994	641.849	343.009	625.481	375.325	451.744	381.25	537.729	148.783	276.978	482.185	609.6	135.367	489.748	552.414	569.721	608.563	598.198	282.632	607.486	764.277	802.144	500.943	385.475	687.852	656.057	763.019	1034.64	603.504	603.3	676.164	707.483	677.056	476.19	519.156	417.633	323.111	406.397	596.981	583.995	222.141	309.615
AASDHPPT	471.251	690.381	463.204	456.412	897.661	808.642	908.5	855.246	1060	548.696	867.603	968.831	481.061	772.917	768.865	456.882	551.079	840.711	729.6	347.78	1063.83	874.483	1106.55	1403.67	1125.23	432.578	893.592	801.021	1118.91	690.566	683.426	1014.48	923.961	789.434	1063.56	828.034	967.001	784.992	617.811	869.143	797.143	818.608	726.218	464.722	422.389	801.509	1348.3	324.108	643.269
AASS	33.8219	16.0088	14.0693	18.1285	4.386	24.6914	5.3486	522.124	5.4394	13.5553	33.3356	14.2857	0	5.2083	7.4779	89.5332	6.4748	45.6457	7.2	3.7453	8.6751	15.1724	11.6072	20.3874	29.7297	0	73.6821	7.3488	432.748	6.6038	25.1397	29.7667	9.7259	6.7925	3.2132	19.4679	4.3042	1.7841	4.329	2.5974	20.9524	25.0195	18.5615	24.9314	5.6444	343.396	84.1006	9.4683	0
AATF	1518.6	1336.74	1024.89	1066.38	1036.55	1322.02	1261.51	877.37	888.662	1461.62	1050.07	470.13	1134.02	2034.38	1473.15	1953.93	1026.62	884.697	1116.8	2029.43	1235.02	1071.72	848.294	1327.22	1192.79	469.256	1116.21	979.23	889.864	1217.92	1073.56	1071.6	791.335	1143.4	1033.57	1322.52	1200.14	1272.04	1032.78	1320.35	1180.95	1370.6	1278.42	1410.12	880.527	1232.45	705.1	474.873	720.192
AATK	42.841	47.026	110.39	220.741	2.924	156.379	45.0812	103.034	79.1433	30.806	117.552	18.1818	337.809	65.625	26.5126	99.4872	212.95	20.914	133.6	311.15	113.565	71.7241	160.566	109.072	39.6396	163.97	29.7864	79.9184	11.6959	11.3208	175.047	68.3829	143.236	56.6038	86.7553	24.0104	49.4978	142.726	19.7897	32.0346	167.619	37.9437	254.06	141.611	292.568	215.094	111.013	245.448	67.3077
ABAT	174.746	110.061	395.022	360.437	178.363	176.955	197.899	316.056	223.695	190.364	282.475	114.286	213.213	77.0833	174.031	161.95	152.518	183.413	219.2	186.731	193.218	246.897	236.981	124.363	168.469	184.466	288.458	273.744	274.854	317.925	122.905	274.336	233.422	176.604	268.834	262.816	228.12	251.554	215.832	284.849	218.095	256.45	470.998	229.369	203.198	246.792	180.312	247.633	219.231
ABCA1	2376.88	833.461	553.03	2286.1	634.503	1367.28	229.226	595.834	39.4357	165.34	442.135	316.883	628.284	43.75	847.573	239.633	330.935	3001.38	1151.08	1338.59	33.123	46.8966	2813.61	1454.52	213.513	70.1187	995.493	581.476	192.982	233.962	3087.26	127.916	156.269	87.2679	225.992	707.982	300.94	302.401	305.504	94.8052	2019.86	292.408	490.104	2271.51	2248.97	786.264	292.67	158.048	346.154
ABCA10	6.7644	7.0039	10.8225	75.1906	11.0088	14.4033	4.5845	2.5284	8.1591	4.0253	14.9133	7.7922	0.6663	0	4.0789	59.2499	5.036	4.9795	11.2	3.2103	21.2934	15.1724	3.8691	5.0968	9.9099	2.1575	25.0833	38.7283	11.6959	9.434	15.0186	16.8946	23.2891	3.0189	11.7816	7.7872	10.043	8.0283	5.5659	5.1948	18.6381	5.473	23.2019	11.9671	1.8815	11.3208	16.1473	16.0233	18.2692
ABCA11P	74.7238	77.4028	58.2143	108.782	244.137	97.0885	86.3572	135.367	96.801	50.2608	38.8272	17.3247	31.2423	0	113.916	8.8875	53.0432	132.696	132.184	0	82.7839	89.3931	197.419	107.584	144.072	67.7886	246.914	14.0914	67.8168	44.7264	96.6853	70.2172	101.653	85.1019	4.3913	117.846	119.362	105.956	8.6085	5.3766	78.0762	65.2619	47.0534	61.4311	28.5795	118.34	170.724	88.2884	26.3942
ABCA12	1.1274	0	6.4935	1.0664	52.6316	0	9.1691	1.8963	0	1.7681	2.6318	6.4935	6.6629	0	7.4779	3.95	0	0	5.6	0	5.5205	8.9655	17.4108	11.213	0.9009	5.3937	1.5677	0	0	0	1.8622	10.4586	3.5367	2.2642	11.7816	5.8404	3.5868	0	0	5.1948	2.8571	3.9093	0	0	0	6.0377	0	17.48	12.5
ABCA13	153.326	10.0055	99.5671	246.334	20.4678	469.136	244.508	67.0038	8.839	17.0915	17.5451	124.675	140.587	37.5	506.458	405.533	60.4317	387.574	62.4	6.4205	86.7508	28.2759	171.206	322.12	21.6216	4.315	15.6771	526.359	926.901	564.151	79.1434	78.037	30.9461	3.0189	44.9843	88.9033	70.3013	53.5222	61.2245	16.4502	120	533.229	450.116	96.734	59.2662	17.3585	10.0921	74.2899	1.9231
ABCA2	4755.36	4978.75	9751.08	4302.85	2497.08	3228.4	6703.34	13292.7	1474.08	5884.19	8556.72	1432.47	1025.42	1490.62	4804.89	6005.31	4805.76	2066.51	4119.2	7857.68	1043.38	1619.31	3436.7	3757.39	3375.68	868.393	6020.77	5529.07	3397.66	5596.23	3554	5115.85	3649.87	3569.81	4234.95	3309.54	3785.51	2053.47	4032.16	2591.34	7830.48	3745.9	1278.42	6329.59	4307.62	4806.79	4495.01	10743.6	979.808
ABCA3	366.404	258.143	244.589	342.309	30.7018	136.831	71.8243	236.41	89.7501	398.998	184.223	44.1558	199.22	12.5	180.829	300.2	590.648	130.298	376	78.6517	64.6688	255.862	80.2832	72.3751	39.6396	574.973	205.369	60.6278	116.959	106.604	594.041	174.578	159.151	29.434	19.279	161.583	314.921	180.191	150.278	27.7056	778.095	201.72	42.9234	432.81	431.797	36.2264	118.414	291.333	76.9231
ABCA5	281.849	413.228	207.792	1943.47	260.921	735.597	271.251	67.0038	62.5531	17.1917	607.059	44.1558	3.9977	125	100.612	872.948	415.108	606.673	555.2	165.329	210.568	77.931	50.2979	194.699	276.577	5.3937	413.874	897.328	431.774	51.8868	384.423	528.56	809.602	86.0377	349.163	155.743	181.492	295.264	20.4082	174.026	466.124	154.808	573.086	544.503	285.042	175.094	460.199	249.09	122.115
ABCA6	5.637	1.0006	8.658	17.0621	4.386	4.1152	6.1127	0.6321	11.5587	9.4298	5.2635	11.6883	3.3314	14.5833	8.1577	11.85	0	4.1496	3.2	0	2.3659	31.7241	0	39.7554	6.3063	14.0237	4.7031	17.4534	18.5185	2.8302	18.622	0.8045	6.1892	18.1132	8.5684	136.275	20.0861	0.892	79.7774	1.7316	8.5714	6.2549	13.9211	1.9945	1.8815	113.207	18.1657	3.6417	24.0385
ABCA7	614.431	1356.75	2933.98	1814.98	875.731	1247.94	1397.52	2965.87	303.247	5773.98	2424.73	549.351	790.885	823.958	2793.34	1943.4	1969.78	1512.12	1616	4334.94	459.779	480	488.47	1207.95	4952.25	276.16	271.997	1316.36	1221.25	1905.66	1351.96	1556.72	1473.03	1323.02	1108.54	2057.11	2771.88	627.994	1635.13	910.822	1943.81	1949.96	2301.62	1692.35	2783.63	1483.77	1989.48	2616.9	2732.69
ABCA8	4.5096	0	11.9048	15.9957	0	0	3.0564	1.8963	0.6799	1.7681	1.7545	6.4935	0	0	18.3549	0	0.7194	4.9795	0	0	10.2524	0	0	11.213	0.9009	0	2.3516	6.4302	0	0	22.3464	0	0.8842	0.7547	0	3.2446	1.4347	0	0.6184	0	29.5238	1.5637	20.8817	2.9918	0	0	51.1332	0	0
ABCA9	11.274	3.0017	12.987	12.7966	0	16.4609	2.2923	0.6321	27.8769	2.3574	7.018	10.3896	6.6629	8.3333	11.5568	6.5833	0.7194	15.7685	0	8.0257	7.0978	445.517	0	13.2518	2.7027	17.26	4.7031	21.1279	15.5945	19.8113	25.1397	5.6315	7.9576	29.434	16.0658	16.2232	10.043	1.7841	88.4354	1.7316	16.1905	16.4191	24.3619	2.9918	0.9407	111.698	26.2394	1.4567	22.1154
ABCB1	20.2931	49.0271	125.541	53.3191	1713.45	23.6626	248.329	25.9166	452.15	383.085	262.298	12.987	940.134	45.8333	1317.47	161.95	43.8849	63.904	48.8	41.1985	447.95	554.483	2771.22	363.914	42.3423	132.686	3758.57	98.2905	27.2904	32.0755	19.5531	310.539	125.553	9.8113	14.9948	601.557	690.818	329.162	122.449	28.5714	153.333	78.9679	12.761	69.808	46.096	1023.4	1256.13	153.678	12.5
ABCB10	985.344	2156.19	871.212	3278.06	1103.8	4104.94	1133.91	661.821	959.375	1587.15	886.025	874.026	678.949	571.875	2135.96	1007.25	736.691	3772	3858.4	371.322	1022.87	1000	962.431	2162.08	2185.59	717.368	1008.03	976.475	657.895	1243.4	1331.47	871.279	728.559	731.321	929.675	1144.71	1039.45	1330.03	1137.91	1056.28	1499.05	759.187	1104.41	1311.39	830.668	640.755	1743.24	869.629	736.538
ABCB11	0	0	2.1645	0	1.462	0	0	1.2642	0	1.1787	0	0	0.6663	0	2.7192	0	0	0	0	0	0.7886	0	0.9673	0	0	0	0	0.9186	32.1637	0	0	0	0.8842	0	1.0711	1.2979	0	0	3.7106	0.8658	0	0	1.1601	0	0	1.5094	0.6728	0	0
ABCB4	9.0192	17.0094	15.1515	20.2613	5.848	5.144	5.3486	1.8963	10.1989	5.8936	23.6858	0	7.3292	3.125	8.8375	7.9	1.4388	4.9795	10.4	5.3505	8.6751	71.0345	18.3781	29.5617	3.6036	2.1575	8.6224	0.9186	0.9747	0.9434	6.5177	8.8496	0	10.566	0	13.6275	3.5868	10.7044	1.8553	2.5974	19.0476	14.0735	6.9606	10.9698	7.5259	6.7925	34.313	5.0983	14.4231
ABCB6	45.5017	84.9369	75.0433	408.766	12.4123	72.1811	163.408	115.449	53.2313	837.312	100.91	39	35.9796	46.875	195.833	19.75	170.82	281.003	148.504	30.9684	71.4669	35.9172	64.3523	414.934	1055.58	13.3765	52.5181	46.1506	76.2086	44.5755	157.579	149.179	113.201	107.419	48.433	93.608	58.1349	31.6584	18.0272	23.1861	251.229	77.3808	358.689	101.641	91.524	120.83	395.616	98.1719	9.5962
ABCB7	888.388	634.351	856.061	685.684	808.48	903.292	1117.1	1028.44	743.158	582.879	945.678	306.493	690.275	870.833	775.663	979.598	531.655	856.48	766.4	582.664	791.798	720.69	759.305	1319.06	1039.64	338.727	1102.88	762.44	806.043	975.472	972.998	823.009	760.389	1006.79	863.269	831.927	755.38	1079.36	719.852	1131.6	861.905	895.231	738.979	694.091	488.241	454.34	784.49	482.884	447.115
ABCB8	232.244	430.238	1278.14	419.088	171.053	192.387	463.801	1043.62	357.641	592.898	573.723	719.481	283.839	275	334.466	697.832	551.079	311.221	274.4	739.433	440.852	384.138	636.462	336.391	489.189	458.468	320.596	448.278	402.534	873.585	293.296	521.319	365.164	378.868	317.032	356.262	467.719	245.31	457.638	309.091	382.857	989.836	327.146	362.005	611.477	210.566	367.351	344.501	195.192
ABCB9	72.2435	123.608	102.522	59.0136	24.9123	36.0494	129.116	159.33	80.1564	112.586	121.754	47.2338	112.223	78.5208	88.1237	86.4917	80.7698	54.0943	139.552	100.021	45.7177	78.5103	74.7988	139.562	148.495	130.658	54.3288	100.541	70.575	102.293	86.3128	138.045	168.656	73.8264	135.82	53.8027	110.359	67.0812	101.534	54.7013	76.4857	127.834	107.007	65.9187	52.0038	188.906	100.093	493.518	47.5192
ABCC1	5050.73	5081.81	3859.31	2768.33	3673.98	4556.58	6127.22	4704.8	7125.62	6063.36	7673.33	2157.14	10808.5	3637.5	7180.83	3256.11	3349.64	4175.34	4949.6	2555.38	7794.16	9129.66	8897.9	3890.93	3450.45	11293.4	3209.09	6314.47	3954.19	3600.94	6310.99	8066.77	11447.4	8317.74	4619.45	3981.83	4048.78	3738.53	5606.06	6263.2	5153.33	2976.54	3097.45	4305.16	5622.77	10270.2	4445.22	6968.68	2575
ABCC10	910.936	878.485	939.394	842.442	681.287	394.033	679.274	749.052	786.673	768.528	1201.84	283.117	522.371	234.375	622.706	595.132	854.676	565.177	727.2	573.569	837.539	824.138	407.22	515.8	803.604	633.226	584.754	891.963	806.043	798.113	727.188	835.881	1063.66	657.359	578.369	558.728	765.423	528.978	927.644	516.883	846.667	752.15	854.988	700.075	1238.01	722.264	732.012	1330.66	868.269
ABCC13	4.5096	7.0039	8.658	6.3983	0	11.3169	0	5.689	1.3599	0	21.0541	15.5844	1.3326	0	0.6798	0	36.6906	15.7685	23.2	0	3.9432	1.3793	6.7709	297.656	109.91	3.2362	5.487	4.593	0	0	5.5866	6.436	0	30.1887	0	2.5957	1.4347	0	0.6184	3.4632	20.9524	7.0367	0	8.9753	11.2888	0.7547	42.3867	0	0
ABCC2	36.0767	34.0188	206.71	73.5804	39.4737	18.5185	13.7536	148.546	69.3524	24.7532	65.7939	29.8701	30.6493	20.8333	29.9116	75.0499	37.4101	68.0536	40	85.0722	32.3344	32.4138	39.658	25.4842	51.3514	17.26	83.0884	146.058	208.577	127.359	50.2793	30.5712	56.5871	45.283	62.1211	51.2654	38.0201	42.8178	72.9746	38.0952	60	114.152	29.0023	37.8958	99.7178	110.189	34.313	44.4283	50.9615
ABCC3	6.7644	5.0028	2.1645	4.2655	11.6959	9.2593	31.3276	1.2642	1.3599	10.6085	125.447	0	16.6572	34.375	20.3943	14.4833	146.763	1.6598	8.8	28.8925	1.5773	5.5172	0	0	7.2072	2.1575	5.487	4.593	1.9493	0.9434	26.0708	32.1802	25.641	34.717	0	3.2446	5.0215	24.085	19.7897	52.8139	35.2381	17.9828	156.613	12.9643	78.0809	87.5472	98.2295	8.0117	122.115
ABCC4	48.478	154.085	829.004	125.833	576.023	105.967	1282.9	583.439	1021.93	510.387	1130.78	338.961	988.107	1436.46	864.718	471.366	192.806	126.148	428.8	275.013	941.64	1800.69	413.023	928.644	2193.69	458.468	700.764	1204.29	436.647	420.755	125.698	2218.83	2101.68	1129.81	1068.91	601.557	314.204	643.159	944.96	2479.65	311.429	522.283	1655.45	272.251	134.525	1004.53	644.547	214.13	547.115
ABCC5	1474.63	954.527	1071.43	1668.89	1413.74	1455.76	2276.22	1070.16	970.253	3259.76	2269.45	575.325	844.188	912.5	2201.9	347.599	2031.65	1946.17	1899.2	727.662	1848.58	1239.31	1138.47	1140.67	3410.81	731.392	1791.1	2782.45	1575.05	1599.06	1890.13	2536.61	1746.24	1914.72	1132.1	2077.87	1208.03	1057.96	1465.06	816.45	1510.48	1260.36	1272.62	657.193	1908.75	1244.53	1682.01	1477.79	712.5
ABCC6	683.202	139.077	509.74	376.433	35.0877	653.292	307.927	219.975	97.9092	15.3234	292.125	158.442	46.6402	159.375	42.1482	263.333	190.648	458.947	804	25.1471	119.085	34.4828	66.7415	106.014	123.423	134.844	40.7603	450.115	201.754	137.736	600.559	152.856	471.264	345.66	122.1	27.904	34.4333	52.6302	53.8033	158.442	210.476	235.34	324.826	441.785	315.146	82.2642	156.763	58.2666	204.808
ABCC6P2	23.6753	1.0006	16.2338	17.0621	0	11.3169	15.2818	8.2174	4.7595	0	12.2815	16.8831	0.6663	8.3333	0	9.2167	12.2302	26.5575	26.4	6.4205	0	3.4483	1.9345	4.0775	14.4144	3.2362	0	20.2093	1.9493	6.6038	27.933	3.218	24.7569	13.5849	0	0	0	0	0	0	7.619	16.4191	22.0418	13.9616	8.4666	1.5094	12.1105	1.4567	0
ABCC9	21.4205	6.0033	5.4113	46.9208	81.8713	8.2305	3.8204	5.0569	0	12.966	0	15.5844	0	3.125	61.8627	0	0	15.7685	1.6	0	4.7319	0	0	22.4261	2.7027	0	0.7839	49.6045	0.9747	0.9434	65.1769	0	5.305	3.7736	3.2132	2.5957	2.8694	4.4602	4.9474	0.8658	26.6667	3.9093	40.6032	15.9561	0	0	10.0921	1.4567	0
ABCD1	538.895	355.196	270.563	570.514	200.292	243.827	391.977	185.841	930.138	1186.39	579.864	238.961	558.35	334.375	622.026	360.766	563.309	251.466	373.6	1434.46	907.729	778.621	222.472	297.656	159.459	1375.4	299.432	336.209	145.224	148.113	354.749	300.08	375.774	278.491	260.266	563.271	613.343	424.61	660.482	234.632	407.619	207.975	774.942	320.12	647.225	370.566	403.683	1187.18	827.885
ABCD2	6.7644	18.01	15.1515	21.3276	24.8538	2.0576	22.9226	10.7459	27.8769	8.2511	150.01	3.8961	1.9989	0	14.276	6.5833	17.2662	59.7544	32	4.2804	66.2461	59.3103	30.9526	34.6585	56.7568	9.7087	14.1093	1.8372	6.8226	10.3774	7.4488	31.3757	7.9576	7.5472	18.2079	24.0104	22.2382	7.1363	6.8027	3.4632	34.2857	32.0563	16.2413	15.9561	29.1627	2.2642	206.551	8.0117	34.6154
ABCD3	758.737	651.36	738.095	571.581	516.082	645.062	672.397	362.832	822.03	263.445	697.416	416.883	461.072	406.25	455.473	535.882	482.734	878.058	679.2	243.446	846.215	653.793	774.781	862.385	657.658	263.215	924.946	792.754	500.975	337.736	696.462	728.077	828.47	622.641	779.727	587.281	659.971	897.389	494.743	754.113	1047.62	731.822	699.536	736.973	513.641	1501.13	2173.83	519.301	511.538
ABCD4	781.285	947.524	887.446	767.795	432.748	759.259	651.767	1180.15	918.579	782.083	632.499	433.766	646.3	587.5	611.149	938.782	862.59	1093.84	724.8	912.788	821.767	748.276	614.215	362.895	584.685	715.21	707.035	703.65	748.538	994.34	805.4	644.409	801.061	707.17	675.835	691.11	612.625	575.364	757.576	536.797	799.048	1023.46	424.594	610.322	627.469	806.793	496.53	1115.08	248.077
ABCE1	1375.42	1677.93	1961.04	1062.12	2826.02	1835.39	2594.08	2261.06	2559.92	1515.25	2771.24	2216.88	2259.39	3035.42	2537.05	1714.3	973.381	1790.14	2065.6	582.13	2620.66	2779.31	3028.52	3516.82	3493.69	959.008	2835.98	2782.45	2091.62	2317.92	1679.7	2471.44	2270.56	2781.13	3173.53	2666.45	2299.14	2829.54	2435.37	3600.87	2143.81	2472.24	2038.28	1906.76	909.69	2689.06	2765.23	1227.24	1131.73
ABCF1	1842.16	1870.03	1700.22	1685.95	1176.9	1511.32	1774.21	1457.65	1470.68	1549.43	1595.72	754.545	1439.18	2427.08	1963.97	2161.96	1197.12	1452.36	1405.6	2942.22	1981.86	1585.52	1419.95	1829.77	1855.86	1125.13	1368.61	1275.02	1320.66	1533.96	1718.81	1506.84	1214.85	1368.3	1247.78	1539.91	1599.71	1421.01	1669.76	1374.03	1541.9	1639.56	1676.33	2064.32	1300.09	1311.7	1694.12	1634.38	910.577
ABCF2	1098.08	1283.71	933.983	1040.79	802.632	753.086	1149.95	1132.74	1208.91	1281.86	1149.2	385.714	1154.01	1202.08	1301.84	886.115	824.46	962.71	624	909.042	1448.74	1345.52	684.826	1247.71	1525.23	756.203	747.012	1009.54	798.246	1224.53	1135.94	1104.59	980.548	1084.53	923.248	1284.23	1055.95	518.273	1324.68	1009.52	1125.71	1163.41	1118.33	1183.74	853.245	452.83	992.387	817.189	563.462
ABCF3	589.628	861.476	477.273	643.029	459.064	690.329	488.252	613.78	566.378	771.475	518.456	236.364	455.075	438.542	544.528	477.949	710.072	698.794	662.4	1280.9	605.678	580	471.059	385.321	553.153	353.83	440.525	486.859	423.002	499.057	597.765	576.83	526.083	489.811	430.564	669.695	592.539	415.689	590.6	408.658	537.143	546.521	429.234	597.357	632.173	473.207	534.207	911.872	386.538
ABCG1	465.614	47.026	77.9221	110.904	182.749	132.716	268.195	98.6094	55.0739	346.545	877.253	81.8182	370.457	396.875	843.644	104.016	19.4245	126.148	522.4	471.375	72.5552	62.069	991.449	362.895	190.09	371.089	1025.28	405.104	12.6706	16.0377	244.879	469.831	636.605	180.377	588.009	463.984	451.937	364.843	243.661	355.844	417.143	33.62	44.0835	323.111	95.9548	845.283	588.704	710.124	33.6538
ABCG2	5.637	6.0033	12.987	24.5268	19.0058	47.3251	22.1585	6.9532	2.0398	58.3468	17.5451	38.961	11.9932	6.25	54.3848	0	28.777	27.3874	19.2	0	5.5205	0.6897	23.2144	70.3364	49.5495	2.1575	4.7031	8.2674	10.7212	0.9434	25.1397	8.0451	1.7683	1.5094	9.6395	18.17	9.3257	0.892	8.658	4.329	45.7143	2.3456	11.6009	11.9671	4.7037	6.0377	169.547	7.2833	0
ABHD1	33.8219	27.0149	33.5498	39.4561	13.1579	25.7202	22.1585	27.8129	10.1989	4.1255	35.0901	20.7792	24.6527	14.5833	10.877	21.0666	20.1439	40.6662	53.6	36.3831	20.5047	8.9655	23.2144	31.6004	7.2072	14.0237	18.0286	39.4999	66.2768	39.6226	24.2086	53.0973	61.008	15.8491	22.4921	15.5743	24.3902	14.2726	21.0266	20.7792	27.619	31.2744	46.4037	6.9808	11.2888	4.5283	13.4561	21.85	22.1154
ABHD10	361.894	642.355	543.29	527.859	1076.02	880.658	764.088	880.531	1028.73	589.362	662.326	942.857	586.334	982.292	891.91	323.899	406.475	898.806	506.4	486.891	1021.29	889.655	1153.95	934.76	875.676	608.414	1221.24	896.556	812.865	584.906	511.173	983.105	795.756	972.83	914.68	1170.67	947.633	727.902	756.339	800	538.095	860.829	462.877	363.002	294.45	621.887	804.675	339.403	589.423
ABHD11	14.6561	59.0326	67.0996	23.4604	36.5497	29.8354	77.1729	131.479	59.1535	40.0766	118.429	79.2208	67.2952	98.9583	72.7396	126.4	16.5468	42.326	44	331.728	34.7003	69.6552	22.2472	69.317	141.441	86.2999	20.3802	99.2091	59.4542	108.491	19.5531	111.826	66.313	124.528	78.1869	87.6055	49.4978	15.1646	118.738	82.2511	52.381	145.426	162.413	42.8821	50.7996	39.2453	96.2111	79.3882	100
ABHD12	622.322	575.318	523.809	399.893	209.064	421.811	419.484	579.646	306.646	727.862	365.814	920.779	514.375	347.917	440.517	775.515	830.935	322.01	597.6	1664.53	346.214	455.862	228.275	353.721	275.676	704.423	558.103	394.08	320.663	636.793	484.171	429.606	421.751	433.962	323.458	518.495	487.087	564.659	620.903	318.615	608.571	778.733	489.559	542.508	640.64	316.226	371.388	870.357	390.385
ABHD12B	63.1342	27.0149	62.7706	60.7838	260.234	61.7284	22.1585	58.7863	65.2728	188.596	28.9493	14.2857	413.099	0	213.46	14.4833	29.4964	64.7339	41.6	3.2103	23.6593	38.6207	113.17	153.925	14.4144	10.7875	168.528	75.3254	21.4425	18.8679	63.3147	40.2253	45.977	19.6226	43.9132	79.1694	87.5179	85.6355	51.9481	39.8268	82.8571	43.0023	68.4455	20.9424	66.7921	18.8679	9.4193	34.9599	81.7308
ABHD13	573.844	499.276	753.247	805.119	616.959	718.107	646.418	557.522	636.41	334.168	631.622	1598.7	424.426	544.792	602.311	568.799	553.957	1014.16	642.4	723.917	753.943	622.759	660.644	822.63	809.009	355.987	759.553	768.87	820.663	625.472	907.821	671.762	652.52	676.981	1006.79	582.09	538.02	794.805	583.797	748.918	774.286	686.474	750.58	797.806	703.669	756.981	617.635	286.963	779.808
ABHD14A	476.888	319.667	242.424	274.06	90.6433	332.901	348.424	369.305	157.743	506.262	257.035	451.948	131.925	459.375	213.61	587.232	436.691	211.846	376.8	597.111	164.038	195.172	141.434	229.358	225.541	373.247	185.773	265.761	163.743	280.189	381.071	327.538	236.958	238.491	238.845	207.008	272.059	236.39	385.714	171.429	323.81	337.764	222.738	344.223	178.137	126.038	134.83	871.085	113.462
ABHD14B	2280.72	1706.94	1255.41	1356.44	599.415	1701.65	1973.64	1981.04	1376.85	1819.95	2223.84	4767.53	1451.18	2928.12	1531.61	3437.81	1330.22	1308.79	1606.4	2751.2	1871.45	1413.1	1036.91	1685.02	1683.78	2888.89	1730.75	1242.87	1407.41	1799.06	1238.36	2063.56	1562.33	1241.51	1403.08	1075.92	1378.05	1544.12	1332.1	1761.9	1263.81	1795.93	1416.47	1346.3	652.869	1622.64	814.767	1806.26	1090.38
ABHD15	558.061	558.308	540.043	423.354	203.216	329.218	591.404	628.319	673.806	944.158	695.661	819.481	630.976	705.208	477.906	441.083	646.763	383.424	516	430.712	647.476	666.207	204.094	573.904	571.171	742.179	618.46	599.847	450.292	641.509	626.629	588.898	613.616	793.962	827.924	741.077	868.006	467.427	792.208	482.251	487.619	613.761	1011.6	414.859	684.854	328.302	355.241	501.821	708.654
ABHD2	3718.15	2305.27	5482.68	5776.59	4114.04	2799.38	6654.44	5037.93	2550.4	4588.77	6489.91	2931.17	7540.39	5714.58	4234.53	3427.28	2374.1	1921.27	2696	1705.19	2831.23	3945.52	4250.17	6339.45	7245.95	3190.94	4167.74	8044.2	7279.73	3359.43	3708.57	10247.8	12931	6688.3	7374.2	3468.53	3569.58	5986.46	6179.34	10435.5	4551.43	4228.3	8937.35	3433.56	3333.96	4666.42	4905.42	3577.57	8371.15
ABHD3	936.866	1185.66	1038.96	1157.02	866.959	1133.74	874.116	953.224	860.785	556.947	597.409	1922.08	565.679	663.542	767.505	479.266	869.784	1445.72	844	698.769	708.202	668.966	780.585	770.642	614.414	570.658	996.277	1186.83	1214.42	916.038	918.063	647.627	740.053	590.943	906.111	1173.26	858.68	942.883	793.445	594.805	763.809	1835.81	612.529	876.589	1216.37	861.132	542.281	253.46	1663.46
ABHD4	305.524	2576.42	584.416	95.9744	257.31	188.272	650.239	513.274	4585.42	1020.77	1560.63	692.208	685.611	508.333	1367.1	464.783	1143.88	1079.73	1660	2203.32	871.451	2497.93	738.992	287.462	608.108	1099.24	1112.29	575.045	870.37	749.057	2002.79	636.364	809.903	813.585	194.932	286.827	554.519	394.28	1139.15	1210.39	1671.43	374.511	574.246	1075.04	571.966	902.641	569.866	1493.81	437.5
ABHD5	585.118	365.202	383.117	721.941	476.608	922.84	397.326	367.889	305.966	340.651	431.608	457.143	360.462	533.333	663.494	833.448	625.899	678.046	417.6	690.209	376.183	337.241	261.162	793.068	1064.86	172.6	248.481	758.766	655.945	948.113	753.259	564.763	401.415	313.207	435.919	367.943	305.595	728.794	257.885	470.996	631.429	663.8	2143.85	570.431	974.6	547.924	630.418	359.068	564.423
ABHD6	20.2931	22.0122	90.9091	18.1285	7.3099	56.5844	93.9828	97.3451	65.9527	21.8064	112.288	103.896	155.245	125	26.5126	28.9666	28.0576	25.7276	32	21.4018	142.744	53.1034	57.0688	13.2518	23.4234	39.9137	41.5442	67.9766	44.8343	92.4528	81.9367	95.7361	71.618	104.906	98.5369	55.8079	38.7374	53.5222	77.9221	42.4242	67.619	78.1861	147.332	13.9616	45.1552	61.8868	63.9165	121.632	210.577
ABHD8	251.409	146.081	298.701	219.675	55.5556	195.473	235.339	285.082	186.299	374.245	228.963	372.727	195.223	107.292	125.085	360.766	164.748	73.0331	155.2	457.999	211.357	160	137.352	146.789	147.748	311.758	204.585	160.756	216.374	153.774	181.564	183.427	183.024	137.358	144.592	180.402	266.141	172.163	139.147	159.307	100	194.683	262.181	128.646	184.384	326.793	209.915	1077.2	140.385
ABI1	1994.34	1454.7	1962.94	1738.64	2502.6	1877.15	1706.38	1859.18	1565.96	1267.85	1977.57	2672.56	2218.66	1875.77	1535.38	1574.48	1293.94	2227.04	1621.98	2608.59	1949.23	1683.03	2296.68	2152.87	1823.23	1616.39	2547.41	1997.06	1913.94	1691.07	2071.82	1841.17	1982.31	2117.8	2078.55	2185.54	1548.89	1974.8	1754.24	2685.21	1841.75	1763.21	1996.29	1664.18	1544.99	2184.51	1809.62	1190.28	2113.77
ABI2	847.802	1224.68	1436.15	256.998	52.6316	371.399	1946.9	2221.24	208.737	48.3277	1705.38	1711.69	1335.91	678.125	348.742	591.182	445.324	1011.67	2276.8	479.401	207.413	1022.76	355.954	1139.65	1401.8	1464.94	964.139	1110.59	1367.45	1970.75	1704.84	1333.87	2203.36	1386.42	2175.31	258.274	71.0187	1328.24	353.741	1125.54	1470.48	950.743	730.859	2622.79	1594.54	2069.43	836.969	1047.34	350.962
ABI3	30.4397	33.0182	11.9048	59.7174	125.731	19.5473	29.7994	8.8496	14.9584	169.147	171.941	7.7922	11.3269	93.75	159.076	31.5999	76.9784	63.904	46.4	494.917	18.9274	81.3793	57.0688	10.1937	27.027	25.89	12.5416	13.779	4.8733	18.8679	27.933	114.24	11.4943	56.6038	12.8526	197.274	236.729	58.8744	103.896	43.29	107.619	83.6591	80.0464	37.8958	92.1919	206.792	189.058	271.668	627.885
ABI3BP	10.1466	6.0033	16.2338	14.9294	38.0117	8.2305	11.4613	10.7459	4.0796	2.9468	4.3863	24.6753	4.664	0	6.7981	1.3167	0.7194	11.6189	5.6	3.7453	6.3091	4.8276	14.509	7.1356	30.6306	9.7087	6.2708	10.1046	5.848	5.6604	14.8976	8.8496	12.3784	4.5283	14.9948	7.7872	8.6083	8.0283	4.9474	10.3896	24.7619	8.6005	30.1624	6.9808	3.7629	23.3962	6.728	7.2833	0
ABL1	2514.09	2916.61	2791.13	2261.8	1997.08	1437.24	2419.1	3692.79	2015.98	4473.85	2517.72	2137.66	1914.25	1705.21	4064.58	2707.06	2297.12	2210.91	2932	2813.8	2227.92	2263.45	2553.59	2224.26	2345.95	3378.64	3189.5	2491.25	2183.24	3058.49	2810.99	2393.4	2309.46	1774.34	2144.25	3099.94	3383.79	3033.82	2084.11	2429.44	2768.57	2393.28	1832.95	2623.78	2087.49	1918.49	1201.63	4586.31	1615.38
ABL2	1715.9	1557.86	1870.13	2155.16	1659.36	1505.14	2254.06	1670.04	1487	839.841	1597.48	776.623	1621.75	1558.33	1268.52	1244.25	1071.22	1539.51	1839.2	846.442	1356.47	1512.41	1896.81	2218.14	1218.02	1053.94	1856.16	2241.39	2175.44	2406.6	1665.74	1972.65	1967.29	1790.19	2165.67	1256.98	1244.62	2289.86	1236.86	2071.86	1831.43	1679.44	1255.22	1784.09	1896.52	2005.28	1574.36	1093.95	1287.5
ABLIM1	350.62	473.262	402.597	277.259	657.895	172.839	667.813	175.095	860.785	670.105	2265.07	20.7792	3277.48	614.583	1499.66	85.5832	241.727	843.201	463.2	181.38	854.89	1435.17	944.053	712.538	1315.32	563.107	1238.49	146.976	88.694	254.717	248.603	600.965	714.412	719.245	1121.39	386.113	281.205	667.244	481.138	1397.4	620.952	278.342	257.541	646.223	622.766	9003.02	4608.71	1214.86	425
ABLIM3	2.2548	2.0011	4.329	17.0621	0	7.2016	3.8204	0.6321	4.0796	5.3043	22.8086	0	2.6652	10.4167	24.4731	2.6333	253.237	10.789	0	18.1915	22.082	2.7586	1.9345	1.0194	4.5045	14.0237	3.1354	6.4302	0.9747	0	8.3799	0.8045	1.7683	3.0189	0	2.5957	2.8694	0.892	0	6.9264	22.8571	2.3456	18.5615	9.9726	6.5851	7.5472	72.6629	3.6417	0
ABO	99.2108	9.005	5.4113	215.409	402.047	1.0288	447.755	268.015	0.6799	545.16	68.4257	12.987	798.881	10.4167	4.0789	210.666	123.022	4.1496	12	1.0701	1.5773	0.6897	19.3454	504.587	657.658	6.4725	333.921	7.3488	184.21	16.9811	34.4507	96.5406	5.305	2.2642	3.2132	801.428	687.948	343.434	0.6184	49.3506	56.1905	1.5637	77.7262	66.8163	70.555	1428.68	169.547	256.373	0.9615
ABP1	985.344	46.0254	44.3723	396.694	14.6199	794.239	32.8558	60.0506	34.6762	18.2702	10.527	27.2727	3.3314	53.125	8.1577	27.65	97.8417	10.789	6.4	52.9695	3.9432	50.3448	10.6399	5.0968	23.4234	314.995	7.8385	135.035	120.858	226.415	59.5903	28.1577	51.2821	6.0377	6.4263	28.5529	205.882	359.491	0.6184	19.0476	0.9524	22.674	131.09	171.528	71.4958	16.6038	8.0737	18.2083	16.3462
ABR	3197.29	3819.11	2804.11	4184.48	165.205	2603.91	1528.18	2903.92	182.9	1491.68	1629.06	1345.45	623.647	1085.42	1153.64	3170.53	4888.49	2639.15	3714.4	3411.45	879.337	508.276	1096.88	1278.29	1411.71	1464.94	926.514	2080.63	1368.42	2768.87	4274.67	1982.3	1458.89	1392.45	2218.15	1624.92	2768.29	2605.64	2369.2	2002.6	4320.95	2484.75	3569.61	4393.92	5197.55	4080	2457.08	7091.77	3842.31
ABRA	6.7644	7.0039	38.961	27.7259	59.9415	3.0864	15.2818	8.8496	8.839	1.1787	9.6498	76.6234	3.9977	3.125	9.5173	6.5833	1.4388	10.789	16	1.0701	6.3091	5.5172	18.3781	10.1937	20.7207	9.7087	19.5963	20.2093	20.4678	11.3208	2.7933	16.0901	2.6525	13.5849	32.1316	8.4361	13.6298	11.5965	16.6976	25.974	8.5714	11.7279	95.1276	8.9753	6.5851	3.7736	6.728	34.9599	58.6538
ABT1	552.424	661.365	441.558	393.495	391.813	509.259	446.227	451.959	437.872	519.228	457.926	454.546	361.795	530.208	441.197	704.415	440.288	502.103	464.8	670.947	539.432	378.621	435.27	488.277	504.505	588.997	412.307	372.953	406.433	535.849	549.348	397.426	370.469	357.736	323.458	539.909	481.349	387.144	422.387	329.87	525.714	480.062	381.671	521.566	569.144	396.981	386.863	786.599	266.346
ABTB1	448.704	507.28	504.329	725.14	1149.12	674.897	419.484	762.958	1848.04	2692.8	866.726	566.234	843.522	919.792	1554.04	762.349	1158.99	712.903	492	2501.34	1661.67	888.966	416.892	189.602	371.171	1606.26	436.606	484.104	338.207	350	667.598	563.958	802.829	767.547	488.401	807.268	2264.71	425.502	755.102	556.71	1132.38	570.758	925.754	500.623	870.179	714.717	810.057	1171.16	923.077
ABTB2	704.622	509.281	1156.93	280.459	473.684	643.004	263.61	639.064	189.019	231.619	87.7253	212.987	142.586	138.542	375.255	704.415	523.022	450.648	251.2	37.4532	73.3438	93.7931	664.513	208.97	45.045	111.111	66.6275	207.604	1136.45	763.207	625.698	118.262	113.174	97.3585	99.608	223.881	154.232	305.077	186.147	120.346	945.714	925.723	89.3271	725.006	229.539	185.66	499.221	254.188	71.1538
ACAA1	1158.96	1377.76	856.061	930.952	725.146	924.897	767.908	1033.5	1075.64	1366.73	737.769	432.467	782.89	847.917	831.407	1572.1	1182.01	961.05	816	2153.02	1013.41	918.621	381.103	554.536	633.333	1166.13	527.533	734.882	918.129	876.415	869.646	744.972	821.397	866.415	742.24	1070.08	1164.99	702.925	949.289	637.229	809.524	1250.98	683.295	810.77	1116.65	693.585	620.326	1005.1	1101.92
ACAA2	904.171	1106.61	807.359	474.54	896.199	652.263	612.798	513.274	1194.63	1082.07	578.987	298.701	996.102	1002.08	1471.79	1111.26	643.165	703.774	883.2	661.316	1414.04	1072.41	795.094	697.248	1058.56	834.952	1042.52	704.568	989.279	975.472	937.616	961.384	916.888	1011.32	367.371	1395.85	1445.48	1271.15	833.024	31.1688	984.762	876.466	849.188	883.57	605.832	323.019	1212.39	391.114	887.5
ACACA	1237.88	1218.67	1840.91	1742.47	2311.4	572.016	2795.8	1894.44	1956.82	1264.77	2258.05	467.533	2240.73	1426.04	1923.18	1238.98	990.648	814.983	2144.8	1148.21	1653.79	2810.34	1657.9	2393.48	2201.8	974.11	1229.08	2775.1	1359.65	2000.94	1303.54	2437.65	2608.31	2545.66	2923.98	1425.05	1455.52	1812.62	2487.94	2619.91	1835.24	1290.85	1547.56	2018.45	1040.45	1541.89	857.153	722.505	972.115
ACACB	679.82	331.183	188.312	2688.35	111.111	949.588	945.941	125.79	220.976	367.173	539.51	120.779	485.725	128.125	121.686	408.166	1017.27	1482.24	2468.8	440.342	994.48	844.138	274.704	426.096	519.82	230.852	1359.2	1282.37	173.489	516.981	2501.86	272.727	973.475	390.943	891.117	512.005	230.273	512.921	453.309	283.983	1569.52	315.872	596.288	1487.91	491.063	40	514.696	270.94	151.923
ACAD10	1025.93	1127.62	1250	1319.11	845.029	838.477	1013.94	1106.19	1153.15	909.975	943.924	310.39	785.555	637.5	808.973	1058.6	859.712	889.676	975.2	350.455	951.104	951.724	963.399	596.33	789.189	924.488	899.863	1278.69	1117.93	1190.57	903.166	1149.64	1271.44	928.302	1034.64	851.395	816.356	725.226	1079.16	889.178	782.857	1039.87	734.339	897.532	837.253	683.774	690.971	917.698	460.577
ACAD11	659.335	986.545	1048.5	1361.57	1121.35	1024.69	942.8	1400.91	774.326	875.108	1033.28	372.727	696.192	316.667	611.067	631.999	1147.96	1691.34	1735.79	980.712	609.621	786.207	728.256	391.366	830.559	261.057	1008.03	1237.26	573.099	1321.7	607.02	710.314	1166.08	1169.06	1245.55	1200.31	852.224	819.577	1056.78	857.056	912.381	1189.85	279.582	1185.74	1028.97	813.426	1073.75	696.038	293.269
ACAD8	591.883	882.488	566.017	567.315	500	634.774	604.394	705.436	652.048	523.943	687.766	249.351	455.742	388.542	529.572	300.2	744.604	928.683	769.6	719.636	546.53	460	405.285	209.99	517.117	299.892	460.122	645.778	457.115	751.887	658.287	578.439	626.879	629.434	637.277	597.015	584.649	343.434	794.063	458.009	559.048	555.903	372.39	689.105	882.408	510.943	968.166	531.682	315.385
ACAD9	964.228	961.471	873.485	1079.24	615.497	1018.52	948.997	1597.45	1025.93	918.173	881.595	145.454	698.031	664.583	845.085	634.632	965.432	765.13	846.208	585.361	868.226	1100.28	588.099	779.817	1006.31	721.683	609.202	849.156	499.025	765.094	707.626	971.891	868.285	836.936	769.252	944.841	1014.31	680.553	894.514	684.883	860.029	693.784	678.921	849.723	842.07	298.113	777.157	1254.39	396.154
ACADM	1138.67	1160.64	1200.22	789.123	1280.7	978.395	1329.51	1164.98	1539.35	786.798	957.083	1267.53	967.452	1264.58	1687.97	1049.38	802.158	1609.22	1268	168.004	1239.75	1383.45	1595.99	1271.15	1364.86	601.942	1693.91	1137.23	1375.24	1111.32	1352.89	1033.79	1301.5	1618.87	1636.57	1556.78	1596.84	1140.92	988.25	1676.19	1073.33	1257.23	1162.41	1211.67	624.647	1067.17	1568.98	450.838	968.269
ACADS	258.174	363.201	113.636	226.073	93.5673	230.453	244.508	243.363	219.616	542.802	203.523	415.584	289.836	300	260.367	277.816	403.597	247.317	280	783.307	244.48	291.034	74.4796	237.513	379.279	714.132	166.961	194.744	125.731	113.207	296.089	403.862	358.974	271.698	248.484	240.104	316.356	263.151	390.229	198.268	319.048	172.791	279.582	254.301	183.443	343.396	273.832	423.161	142.308
ACADSB	524.239	383.212	616.883	563.05	676.901	602.881	479.847	584.071	1217.07	629.439	627.236	337.662	559.683	334.375	619.986	305.466	369.065	776.807	549.6	82.397	1287.07	1442.07	626.789	652.395	619.82	800.432	1110.72	790.917	640.351	500	689.944	730.491	553.492	552.453	590.151	904.607	744.62	542.358	611.008	523.809	880.952	487.099	685.615	735.976	285.983	873.207	466.927	238.165	378.846
ACADVL	6258.86	7298.85	5626.55	8517.11	2140.34	6489.7	4614.99	5188.27	4910.38	4987.76	4437.99	2608.86	3264.07	2796.85	2564.24	7959.17	9166.83	6030.11	5221.53	14470.8	4144.28	4357.21	2093.15	1797.14	4849.52	3797.16	2909.64	4231.97	2564.33	6129.16	7324.81	3828.58	4516.3	5935.82	3840.66	3437.35	3841.44	3833.83	5727.86	2515.88	4605.38	8266.55	3805.05	5711.26	9150.48	4516.82	6796	4527.28	2923.05
ACAP1	2662.91	3485.93	2338.74	2447.35	1656.43	2031.89	2252.53	3273.7	1952.75	3303.96	2931.78	2083.12	1572.44	2965.62	1855.88	3878.89	3961.15	2273.16	2001.6	5025.15	2163.25	2142.76	2307.9	748.216	1136.04	3156.42	1801.29	1989.69	1591.62	1001.89	2224.39	1641.19	2740.05	1685.28	900.756	2138.22	1470.59	1588.72	2316.02	1249.35	2051.43	1649.73	1155.45	2350.54	1914.39	3226.42	1643.66	1743.63	1280.77
ACAP2	2405.86	1907.05	2852.81	3789.92	3682.75	2616.26	3524.74	2393.17	3078.7	1834.68	3083.54	3320.78	2629.84	1692.71	2217.54	1610.28	1908.63	2833.35	2973.6	1836.81	2708.99	2786.21	3221.97	3108.05	3142.34	1852.21	3983.54	2983.62	2503.9	3432.08	2476.72	2424.78	3135.28	3743.4	3631.94	2778.72	2582.5	3528.01	2724.8	4219.05	2351.43	2258.01	3895.59	3061.58	3159.92	3164.53	3284.63	1715.95	3790.38
ACAP3	1549.65	3205.38	2198.05	1929.09	577.485	1769.55	992.084	2945.25	1509.43	2613	1386.94	851.948	1205.32	925.344	1309.36	2726.81	4423.47	2506.98	2201.6	7384.99	1172.71	1417.24	913.101	451.58	1033.69	1402.37	1471.29	1435.74	1260.23	2237.74	2151.77	1334.98	1596.82	1674.35	1160.67	1352	1892.09	964.72	2043.82	706.416	2136.21	2160.28	1249.42	2853.83	3782.07	1444.53	1533.32	4710.72	1317.31
ACAT1	892.897	762.421	374.459	943.748	859.649	629.63	569.245	233.249	725.48	704.288	616.709	275.325	1030.75	504.167	1105.37	666.232	356.115	536.96	784.8	365.436	1154.57	907.586	210.864	966.361	846.847	553.398	366.843	465.731	289.474	223.585	739.292	704.747	333.333	793.207	566.587	966.905	982.783	922.366	1370.44	757.576	504.762	653.636	1100.93	730.99	309.501	587.924	922.415	260.743	601.923
ACAT2	271.748	379.7	307.5	194.849	295.38	103.107	330.46	370.101	197.103	264.712	302.021	118.13	333.724	436.115	519.783	622.795	342.806	242.42	387.824	201.043	255.095	419.303	264.035	376.463	302.541	91.4024	166.874	275.259	385.789	418.104	388.277	442.381	315.659	470	469.1	412.239	474.218	421.273	545.362	457.238	351.81	346.568	225.87	371.07	325.786	476.362	371.449	261.442	225.519
ACBD3	1028.18	978.541	857.143	1315.92	1247.08	1274.69	1070.49	843.869	1145.67	641.815	842.163	1016.88	682.28	993.75	923.861	541.149	943.165	1402.57	1085.6	1057.78	1215.3	917.241	1365.78	1139.65	1049.55	738.943	1175.78	991.172	1498.05	1021.7	1352.89	960.579	878.868	952.453	1181.37	1134.33	1213.77	1184.62	847.866	993.074	1112.38	1023.46	1208.82	1213.66	840.075	923.019	1263.53	483.613	920.192
ACBD4	139.797	167.092	245.671	198.347	95.0292	110.082	157.402	376.106	300.527	343.598	296.511	377.922	163.241	210.417	229.776	211.983	159.712	144.406	162.4	306.581	234.227	248.965	130.581	70.3364	200	255.663	245.346	202.093	139.376	147.17	148.976	230.893	347.48	246.792	202.429	232.317	265.423	185.544	241.806	195.671	145.714	245.504	178.654	116.679	157.102	289.811	195.113	351.784	196.154
ACBD5	728.298	522.289	638.528	853.106	1054.09	903.292	657.88	479.772	732.279	563.43	701.802	664.935	699.604	481.25	750.51	556.949	512.95	789.256	603.2	542.001	742.902	709.655	886.017	492.355	520.721	489.752	872.428	701.812	695.906	666.981	766.294	537.409	685.234	768.302	716.535	888.384	758.967	851.003	596.166	750.649	1086.67	652.072	624.13	710.047	650.047	620.377	610.234	323.38	748.077
ACBD6	649.38	539.298	471.861	460.677	384.503	404.321	444.699	456.384	384.838	502.136	535.124	261.039	491.055	607.292	496.941	566.166	387.05	352.717	484.8	513.109	365.142	468.276	398.514	508.665	437.838	394.822	435.038	433.58	255.361	346.226	488.827	465.004	391.689	473.207	400.574	544.452	452.654	452.263	475.572	465.801	452.381	474.589	269.142	510.596	369.708	468.679	400.319	563.001	193.269
ACBD7	9.0192	89.0492	23.8095	20.2613	30.7018	5.144	49.6657	110.62	8.839	12.966	30.7038	53.2468	17.9898	17.7083	16.9952	23.7	5.7554	26.5575	48.8	6.9556	6.3091	4.1379	27.0835	21.4067	18.018	17.26	12.5416	16.5348	63.3528	21.6981	20.4842	56.3154	19.4518	12.8302	42.8421	8.4361	4.3042	8.0283	11.7502	10.3896	15.2381	51.6028	6.9606	26.926	15.0517	26.4151	4.0368	24.7633	3.8462
ACCN2	110.485	132.073	15.1515	14.9294	1.462	25.7202	3.0564	60.6827	137.345	2.3574	21.0541	25.974	18.6561	27.0833	1.3596	17.1166	37.4101	70.5434	1620.8	20.8668	145.899	241.379	0	0	1.8018	734.628	11.7578	5.5116	8.7719	38.6792	108.007	8.8496	22.1043	61.8868	62.1211	3.8936	1.4347	3.5681	11.1317	24.2424	58.0952	39.8749	8.1206	1421.09	94.0734	13.5849	8.7465	51.7116	16.3462
ACCN3	6.7644	22.0122	387.446	13.863	5.848	6.1728	18.3381	443.742	16.9981	10.0192	28.0721	125.974	9.9943	7.2917	6.7981	208.033	24.4604	12.4488	8.8	118.78	22.8707	12.4138	146.057	9.1743	15.3153	16.1812	25.8671	23.8837	29.2398	286.793	11.1732	26.5487	10.6101	9.8113	9.6395	13.6275	16.4993	64.2266	14.8423	4.329	20	317.435	4.6404	32.9095	23.5183	58.8679	24.221	32.0466	17.3077
ACCN4	3.3822	1.0006	1.0823	3.1991	1.462	1.0288	0.7641	3.1606	0	2.9468	0.8773	10.3896	0	0	3.399	3.95	5.7554	1.6598	0	3.7453	0.7886	1.3793	0.9673	8.1549	9.009	1.0787	3.1354	0	2.924	1.8868	0.9311	3.218	5.305	0.7547	0	0	0.7174	0	1.2369	2.5974	4.7619	1.5637	6.9606	1.9945	2.8222	3.0189	4.7096	8.0117	0
ACCS	3860.2	4351.4	832.251	2009.06	2426.9	1372.43	1292.07	2515.17	2875.4	5445.7	1292.19	516.883	2732.45	396.875	1880.35	429.233	4852.52	4963.76	6376.8	2409.84	3675.87	3586.21	502.979	545.362	990.991	3327.94	1298.06	3176.53	717.349	440.566	3075.42	1103.78	2950.49	1006.79	1472.7	2094.74	4326.4	1466.51	1819.42	1260.61	3511.43	1310.4	631.091	2654.7	1541.86	2299.62	1490.26	795.339	361.538
ACD	494.927	641.354	691.558	380.699	166.667	572.016	482.139	816.688	320.245	843.966	512.316	1085.71	415.098	594.792	509.177	1041.48	743.885	492.144	444	994.115	377.76	401.379	176.043	306.83	446.847	425.027	386.439	441.848	428.85	700.943	517.691	508.447	434.129	403.774	333.098	408.825	453.372	377.332	687.693	354.113	589.524	747.459	386.311	404.887	560.677	271.698	414.448	1337.22	256.731
ACE	219.842	52.0287	5.4113	2.1328	1.462	10.2881	3.0564	10.7459	12.9186	8.8404	44.7399	0	546.357	22.9167	15.6356	2.6333	530.216	39.8363	20	31.5677	6.3091	24.1379	101.563	3.0581	9.9099	212.513	6.2708	19.2907	1.9493	8.4906	113.594	19.3081	55.7029	38.4906	3.2132	21.4147	8.6083	22.3009	23.5003	20.7792	150.476	0	15.0812	123.66	21.6369	458.113	124.469	3292.06	86.5385
ACER2	28.1849	87.0481	76.8398	73.5804	26.3158	22.6337	72.5883	104.93	67.9925	38.8979	101.761	29.8701	70.6266	7.2917	59.1434	7.9	62.5899	68.8835	92	8.0257	69.4006	58.6207	72.5451	56.0652	68.4685	59.3312	47.815	53.279	37.037	66.0377	104.283	67.5784	82.2281	41.5094	32.1316	40.8825	27.2597	66.0107	22.2635	14.7186	118.095	43.7842	40.6032	77.7861	76.1994	37.7358	61.898	5.8267	5.7692
ACER3	434.047	294.163	870.13	603.572	915.205	457.819	469.15	678.255	505.184	414.322	493.016	493.507	480.394	434.375	698.164	1199.48	606.475	420.771	406.4	523.809	554.416	680	596.804	550.459	575.676	343.042	796.394	775.301	1141.33	842.453	527.933	579.244	690.539	584.151	702.611	713.822	826.399	1206.93	863.327	906.494	630.476	713.057	1714.62	728.995	886.171	596.981	822.168	332.119	2125.96
ACHE	19.1657	12.0066	25.974	61.8502	2.924	26.749	87.8701	25.2845	11.5587	429.055	39.4764	25.974	0	11.4583	165.874	2.6333	80.5755	130.298	84	11.771	6.3091	9.6552	9.6727	192.661	306.306	7.5512	15.6771	2.7558	1.9493	2.8302	19.5531	4.0225	0	6.0377	4.2842	33.0954	30.8465	0	3.0921	0.8658	193.333	18.7647	34.8028	34.904	8.4666	0.7547	160.128	22.5783	0
ACIN1	8828.64	7732.27	8180.74	9938.68	5654.97	7028.81	7103.72	8814.79	8757.44	6904.38	7117.15	3894.81	7048.67	5513.54	6085.66	7017.82	7387.77	7641.09	7276.8	7128.95	6985.02	7045.52	5924.51	5362.9	6588.29	4033.44	6408.78	7966.12	6438.6	8334.91	6603.35	6810.94	7638.37	7238.49	7318.51	6658.01	6346.48	6328.11	6717.38	5780.09	7567.62	7315.09	5093.97	7729.74	8376.29	5491.32	5750.46	8331.39	5264.42
ACLY	2146.56	2667.47	2976.19	1993.07	2888.89	1953.7	3788.35	3233.25	3511.81	4442.61	3343.21	1757.14	3380.08	2946.88	4370.5	2506.93	2649.64	2016.71	2638.4	1849.12	3228.71	4544.14	2965.64	3373.09	3658.56	4259.98	2887.71	3483.34	2714.43	2934.91	2740.22	3582.46	3309.46	3469.43	3207.81	3475.02	3383.07	2910.72	3941.25	3143.72	2819.05	3097.73	3447.8	2867.12	2843.84	2631.7	1754	2246.18	3042.31
ACN9	298.76	292.161	193.723	205.812	188.596	315.844	195.607	191.53	172.021	101.37	171.941	735.065	131.925	245.833	186.948	273.866	126.619	276.364	315.2	65.8106	254.732	197.931	97.694	209.99	166.667	274.002	276.7	176.372	214.425	219.811	268.156	183.427	170.645	184.906	156.374	177.807	199.426	71.3629	208.411	208.658	210.476	250.977	204.176	215.408	108.184	86.7925	246.247	124.545	249.038
ACO1	666.291	687.38	441.558	455.345	428.363	423.868	663.228	690.265	363.76	120.23	595.654	162.338	595.663	351.042	253.569	260.7	444.604	567.667	572.8	191.011	533.912	308.966	124.778	972.477	876.577	47.4649	337.057	585.15	615.01	623.585	756.983	632.341	493.369	366.038	455.198	298.507	388.092	697.573	262.832	330.736	624.762	415.95	373.55	584.393	503.293	703.396	629.073	450.109	185.577
ACO2	1353.2	1648.9	1149.65	1035.88	1286.55	670.988	1563.5	1248.27	1533.35	3144.45	1235.99	573.467	1706.1	1105.1	2445.16	1611.07	1520.29	791.09	1505.93	2066.62	1588.08	2042.03	1505.37	1414.12	1416.68	2809.23	1230.73	1119.61	1075.53	1029.92	1566.09	1539.07	1257.6	1553.68	1088.13	1659.99	1631.97	1453.5	2085.22	1289.72	1538.41	1251.18	1448.9	1543.33	1327.82	1492.63	2113.83	2758.62	1402.8
ACOT1	134.16	66.0365	81.1688	75.7131	95.0292	53.4979	124.546	39.1909	110.828	98.4235	150.01	205.195	129.26	76.0417	127.804	111.916	53.2374	56.4347	112	225.789	88.3281	98.6207	121.876	167.176	213.513	314.995	34.4895	149.732	110.136	38.6792	72.6257	171.36	142.352	102.641	113.532	109.02	118.364	82.9594	105.751	84.8485	74.2857	82.8772	96.2877	100.723	12.2295	155.472	63.9165	202.476	8.6538
ACOT11	893.145	694.003	510.887	943.642	78.9474	363.755	802.116	521.663	581.377	232.763	786.51	93.5065	272.506	321.167	304.405	205.084	530.317	408.147	934.368	199.583	331.932	460.959	573.957	529.286	456.622	769.148	309.771	588.347	113.304	165.783	498.808	554.714	806.039	533.887	490.885	405.62	364.067	1379.2	358.312	408.58	560.362	234.363	245.94	1294.17	704.318	971.766	749.841	1952.28	192.654
ACOT13	585.096	626.516	570.584	669.731	946.667	654.753	630.502	516.745	616.842	432.332	532.545	891.753	455.589	549.438	624.058	542.584	578.396	665.531	562.336	201.124	729.101	475.393	622.978	735.79	724.234	667.476	828.916	578.334	968.421	555.491	580.717	656.259	572.9	519.034	895.176	607.807	634.24	517.221	530.037	699.861	588.067	562.549	628.596	552.76	525.56	456.724	424.399	329.548	350.279
ACOT2	118.377	53.0293	99.5671	53.3191	89.1813	40.1235	111.557	56.2579	118.307	172.094	176.328	202.597	161.242	45.8333	135.282	64.5166	53.2374	63.0741	104	244.516	89.9054	124.828	180.879	203.874	218.919	310.68	53.302	150.651	102.339	31.1321	64.2458	145.615	152.962	122.264	91.0396	101.882	119.082	101.692	94.6197	87.4459	91.4286	71.9312	98.6079	95.7367	23.5183	252.076	100.248	498.179	33.6538
ACOT4	33.8219	7.0039	37.8788	11.7302	7.3099	19.5473	43.553	12.0101	69.3524	4.1255	24.5631	29.8701	58.6334	195.833	10.877	19.75	7.9137	20.7481	54.4	57.7849	14.1956	57.2414	15.4763	142.712	72.0721	49.6224	13.3255	130.442	42.885	8.4906	10.2421	111.022	183.024	86.0377	9.6395	5.8404	8.6083	14.2726	82.2511	6.9264	28.5714	5.473	60.3248	10.9698	1.8815	25.6604	10.0921	133.285	25
ACOT7	299.887	311.172	186.147	271.928	64.3275	146.09	326.265	334.387	131.226	358.921	186.855	206.494	366.459	353.125	433.719	575.382	506.475	229.888	476	680.578	165.615	151.724	50.2979	187.564	321.622	378.641	127.768	246.185	217.349	269.811	230.912	319.389	284.704	338.868	265.621	219.987	282.64	247.094	857.761	207.792	247.619	480.062	234.339	332.087	502.352	449.811	176.948	1595.78	98.0769
ACOT8	521.928	543.74	497.143	556.022	369.635	280.257	422.946	484.949	443.978	596.947	490.674	553.117	351.447	336.188	403.005	355.802	532.158	375.44	430.04	577.164	438.115	474.614	343.641	330.153	351.441	528.835	278.417	397.525	347.953	470.255	360.54	469.405	506.481	523.932	347.846	481.642	584.742	350.347	373.612	306.84	359.295	431.157	418.399	363.48	641.364	441.94	436.408	678.143	499.75
ACOT9	178.129	23.0127	442.641	214.343	266.082	153.292	334.671	247.788	454.87	316.487	391.255	380.519	417.763	405.208	345.343	510.866	410.791	253.956	148.8	556.447	428.233	507.586	329.838	170.234	354.955	497.303	339.408	384.894	330.409	500.943	25.1397	438.455	509.284	636.981	304.179	468.527	413.199	396.956	623.995	325.541	178.095	454.261	511.601	70.8053	470.367	398.491	297.38	348.143	603.846
ACOX1	1200.14	1546.85	1087.27	1312.72	1412.28	1388.89	1020.34	1089.87	1274.43	1027.39	1146.88	927.494	1216.64	976.042	1522.4	712.315	907.381	1358	1427.08	452.204	1287.85	1366.32	1353.21	973.496	1440.09	1375.2	1095.83	1092.22	1351.85	1396.23	1719.74	1691.07	1528.74	1075.79	1366.15	1125.46	1460.83	1548.58	1065.77	1298.81	1449.67	878.812	1519.72	1401.53	1151.46	1440.75	1174.72	911.144	1224.04
ACOX2	0	1.0006	0	4.2655	1.462	6.1728	8.405	1.2642	0	3.5362	12.2815	0	0	4.1667	2.0394	1.3167	0	0	0.8	59.9251	0.7886	0	0	0	23.4234	0	0	2.7558	0	0.9434	3.7244	0	10.6101	0	10.7105	1.2979	0	0.892	0.6184	3.4632	0	0	10.4408	0	0	15.8491	1.3456	3.6417	0
ACOX3	314.543	353.195	255.411	357.238	248.538	179.012	401.146	278.129	417.474	424.93	475.471	58.4416	331.146	153.125	365.058	138.25	312.95	267.235	386.4	178.705	288.644	454.483	246.653	330.275	308.108	283.711	268.078	413.371	242.69	224.528	349.162	368.463	415.562	418.113	390.935	371.188	321.377	282.776	317.254	306.493	300	211.884	322.506	305.161	253.998	394.717	424.54	453.023	166.346
ACP1	1302.14	1544.85	941.558	729.405	1122.81	1267.49	1073.54	1225.66	1054.56	1081.48	1327.28	1249.35	1024.09	1522.92	1270.56	1957.88	839.568	1490.54	1139.2	1283.04	1371.45	1024.83	1241.97	1057.08	1334.23	771.305	1059.77	1006.79	991.228	1086.79	1378.96	1120.68	1149.43	1269.43	1137.46	1308.89	1104.02	955.371	1136.67	1253.68	1381.9	1354.18	851.508	1314.39	701.787	1195.47	1153.19	1020.39	682.692
ACP2	458.85	287.159	454.546	243.135	269.006	434.156	331.614	570.164	282.849	311.772	434.24	258.442	171.236	283.333	301.156	380.516	458.273	391.723	214.4	444.088	212.145	254.483	204.094	346.585	411.712	416.397	213.992	264.558	599.415	498.113	351.955	392.599	634.836	329.057	248.484	226.476	342.181	171.271	294.372	210.39	308.571	607.506	457.077	247.32	475.071	330.566	747.486	935.907	465.385
ACP5	179.256	47.026	50.8658	253.799	96.4912	149.177	141.356	121.365	36.036	315.309	193.873	36.3636	85.9513	98.9583	114.888	80.3165	114.388	68.0536	177.6	125.201	56.7823	51.7241	60.9379	82.5688	75.6757	29.1262	39.9765	43.1743	14.6199	152.83	53.0726	171.36	73.3864	155.472	173.511	254.38	241.033	184.652	236.24	13.8528	64.7619	72.7131	66.1253	120.668	57.3848	62.6415	174.929	45.8849	73.0769
ACP6	171.364	94.052	207.792	229.272	20.4678	131.687	419.484	220.607	492.946	10.6085	694.784	97.4026	321.818	386.458	1.3596	192.233	135.252	264.745	616.8	306.581	423.502	373.103	16.4436	280.326	547.748	412.082	264.942	638.429	203.704	236.792	172.253	446.5	549.956	590.189	581.582	35.6911	32.2812	283.668	329.004	297.836	228.571	275.215	189.095	189.479	37.6294	240	378.116	662.782	154.808
ACPL2	64.2616	147.081	142.857	91.7089	38.0117	124.486	158.166	138.432	167.262	26.5213	114.043	37.6623	71.2929	8.3333	53.0252	67.1499	37.4101	154.365	297.6	73.3012	107.255	68.2759	126.712	203.874	44.1441	35.5987	47.0312	118.5	162.768	106.604	185.289	63.5559	26.5252	21.8868	128.526	70.0844	62.4103	81.1753	121.212	22.5108	117.143	154.027	53.3643	196.46	118.532	83.0189	112.358	77.2032	87.5
ACPP	23.6753	58.0321	229.437	105.572	119.883	30.8642	207.832	125.158	76.8315	135.553	171.064	105.195	8.6618	178.125	48.9463	223.833	12.9496	7.4693	26.4	154.093	41.7981	254.483	42.5598	107.034	92.7928	173.679	49.3827	163.511	91.6179	143.396	17.6909	102.172	115.827	276.981	164.942	282.933	270.445	586.068	383.426	173.16	44.7619	283.815	346.868	21.9397	92.1919	94.3396	79.391	28.405	999.038
ACR	13.5287	10.0055	6.4935	11.7302	0	1.0288	7.6409	1.8963	7.4792	2.3574	5.2635	0	16.6572	0	3.399	0	3.5971	20.7481	19.2	1.0701	11.8297	4.1379	6.7709	2.0387	3.6036	25.89	25.0833	0	0	0	27.0019	0	0.8842	0	3.2132	0	3.5868	12.4885	1.2369	5.1948	19.0476	0	0	8.9753	4.7037	32.4528	55.8428	107.065	0
ACRBP	334.837	275.152	151.515	380.699	108.187	145.062	467.622	231.353	216.216	209.813	224.577	180.519	189.226	189.583	110.129	323.899	619.424	220.759	433.6	584.27	234.227	146.207	244.719	190.622	108.108	156.419	122.281	303.139	288.499	123.585	329.609	259.051	326.26	208.302	63.1922	157.041	185.796	104.368	312.925	121.212	273.333	136.826	244.78	299.177	278.457	171.321	111.686	155.135	159.615
ACRC	84.5547	81.0448	85.4978	226.073	74.5614	98.7654	88.6342	66.3717	103.349	61.2936	79.83	48.0519	26.6516	17.7083	61.1829	34.2333	114.388	184.243	94.4	31.0326	104.89	46.2069	34.8216	54.0265	101.802	22.6537	39.1926	51.4417	97.4659	116.981	46.5549	65.1649	53.0504	49.0566	85.6843	87.6055	98.2783	66.0107	44.5269	32.0346	73.3333	111.806	62.645	58.8382	93.1326	85.283	126.487	46.6133	6.7308
ACRV1	6.7644	1.0006	14.0693	13.863	16.0819	2.0576	12.9895	17.067	10.1989	5.3043	3.509	12.987	9.328	4.1667	16.3154	5.2667	2.8777	4.1496	8.8	1.6051	5.5205	8.9655	4.8363	1.0194	4.5045	20.4962	3.1354	13.779	9.7466	7.5472	2.7933	7.2405	3.5367	12.0755	6.4263	11.6807	9.3257	8.0283	13.6054	11.2554	7.619	17.9828	2.3202	2.9918	5.6444	3.7736	12.1105	10.1966	0
ACSBG1	2.2548	1.0006	2.1645	9.5974	5.848	4.1152	11.4613	30.9735	10.1989	83.6894	7.8953	11.6883	3.9977	3.125	133.923	9.2167	2.8777	16.5984	5.6	5.3505	8.6751	4.8276	6.7709	2.0387	45.9459	6.4725	3.9193	7.3488	2.924	6.6038	2.7933	44.2478	5.305	12.0755	8.5684	14.2764	20.8034	11.5965	13.6054	33.7662	12.381	4.6912	46.4037	9.9726	4.7037	5.283	37.0043	8.0117	0
ACSBG2	10.1466	17.0094	21.645	13.863	17.5439	3.0864	9.9331	13.9064	4.0796	5.8936	9.6498	7.7922	5.9966	25	4.0789	3.95	5.7554	12.4488	10.4	2.6752	4.7319	6.8966	4.8363	2.0387	10.8108	3.2362	7.8385	17.4534	14.6199	3.7736	7.4488	10.4586	10.6101	6.0377	14.9948	5.1914	6.4562	14.2726	6.1843	10.3896	9.5238	8.6005	10.4408	10.9698	6.5851	4.566	10.7649	8.74	0.9615
ACSF2	286.358	307.17	307.359	95.9744	65.7895	76.1317	371.347	432.996	521.503	393.694	289.493	220.779	515.708	346.875	392.93	369.983	145.324	106.23	376	434.457	365.931	347.586	398.514	74.4139	105.405	1220.06	292.377	191.988	201.754	150	301.676	252.615	377.542	360.755	388.793	373.783	225.251	226.577	309.215	488.312	275.238	224.394	150.812	202.443	175.917	730.566	217.989	452.294	409.615
ACSF3	760.992	658.364	766.234	591.842	624.269	467.078	787.775	804.678	561.618	935.907	750.051	520.779	661.625	640.625	835.486	828.182	672.662	453.137	636.8	699.304	624.606	528.276	765.109	465.851	511.712	812.298	552.616	568.615	426.901	524.528	704.842	597.747	561.45	629.434	546.237	648.28	631.277	692.221	902.907	566.234	609.524	691.165	476.798	506.607	511.759	716.226	896.849	771.304	471.154
ACSL1	3259.3	965.534	1225.11	4827.51	1014.62	5002.06	615.091	898.23	737.719	599.381	636.008	597.403	1019.42	851.042	857.92	1709.03	1958.27	1542	885.6	3223.65	1037.07	613.793	227.308	92.7625	403.604	242.718	214.776	1046.29	1343.08	1713.21	1051.21	1004.02	1289.12	1344.15	950.025	826.736	1140.6	2639.54	1544.22	1228.57	1159.05	4174.35	3552.2	914.485	3111.95	490.566	720.574	338.674	7754.81
ACSL3	471.251	390.216	377.706	571.581	292.398	673.868	614.327	500	575.217	252.247	550.037	650.649	77.9558	496.875	508.498	445.033	529.496	689.665	633.6	830.926	656.151	583.448	754.469	1040.77	628.829	344.121	438.174	705.487	807.992	542.453	731.844	702.333	600.354	632.453	827.924	596.366	439.742	487.052	481.138	735.931	689.524	655.199	807.425	761.905	590.781	692.076	614.271	335.761	500
ACSL4	945.885	852.471	1798.7	984.271	2692.98	1306.58	1765.04	1138.43	2273.67	1607.78	1735.21	2118.18	2118.13	1913.54	1879.67	563.532	1064.03	1176	1175.2	1286.25	2303.63	2513.1	2157.01	1518.86	4766.67	1170.44	2405.64	2065.94	2423	1536.79	1063.31	2284.79	1717.06	2307.92	2167.81	2521.74	2625.54	2040.98	1411.87	2739.39	1075.24	1892.1	3919.95	933.433	1492	2033.21	1575.71	640.204	3101.92
ACSL5	954.904	761.421	1163.42	900.027	1877.19	822.016	1983.57	1183.94	1477.48	1703.85	1715.03	667.533	1415.2	1787.5	1685.25	907.182	661.87	684.686	1027.2	703.05	1402.21	1382.07	1082.37	1185.53	2076.58	721.683	1433.67	1646.14	1207.6	979.245	715.084	1977.47	1591.51	2085.28	1529.46	1691.76	1752.51	1686.84	1786.64	1824.24	860	1288.51	1366.59	824.732	637.817	1361.51	1765.44	1707.94	1221.15
ACSL6	16.9109	20.0111	8.658	43.7217	13.1579	22.6337	34.384	18.9633	12.2387	311.183	120.184	2.5974	0	7.2917	227.056	2.6333	117.986	103.74	137.6	0.535	15.7729	22.7586	19.3454	216.106	279.279	6.4725	13.3255	3.6744	0	1.8868	45.6238	22.5261	2.6525	12.8302	12.8526	26.6061	17.2166	1.7841	0.6184	0.8658	222.857	7.8186	40.6032	52.8546	26.3405	1.5094	205.206	5.0983	0
ACSM1	302.142	135.075	29.2208	342.309	2.924	174.897	126.839	171.934	82.9509	5.8936	108.779	3.8961	18.6561	14.5833	6.7981	290.983	135.971	228.229	125.6	29.4275	171.924	122.759	0.9673	95.8206	111.712	2.1575	9.4062	191.988	38.9864	301.887	145.251	216.412	22.9885	24.9057	265.621	36.34	7.1736	8.9204	10.5133	19.0476	26.6667	100.078	11.6009	36.8985	189.088	3.0189	4.7096	12.3816	0
ACSM3	879.56	725.791	202.587	601.919	428.86	1084.43	1054.49	683.04	743.185	343.256	858.471	19.8571	87.5571	758.833	258.552	1028.06	600.194	1157.11	501.688	209.652	1220.46	646.917	163.816	722.447	902.252	118.555	113.298	887.48	1346.35	3058.85	525.419	1169.17	701.105	355.796	1627.04	469.961	288.917	285.8	138.584	341.004	158.752	598.444	245.464	201.107	832.314	629.683	142.931	13.11	92.6827
ACSS1	1403.61	1987.1	2291.13	1658.22	2336.26	1227.37	2756.83	3279.39	3331.63	5109.77	2702.82	1779.22	2425.29	2171.88	3959.89	2438.46	1603.6	1722.09	2081.6	1540.93	3037.85	3197.24	2786.7	2253.82	2343.24	4745.42	2829.71	2063.18	1846	2922.64	1755.12	2308.93	2547.3	2647.55	2197.8	2739.78	3297.7	2222.96	1845.39	2657.14	1966.67	2555.9	1769.14	2145.1	1254	1831.7	2836.55	3865.99	1358.65
ACSS2	604.284	1240.69	622.294	737.937	42.3977	545.268	481.375	786.979	531.702	306.468	351.778	344.156	915.481	411.458	88.3753	601.716	1164.03	747.76	1204.8	924.559	396.688	625.517	91.8904	323.14	317.117	893.204	413.09	448.278	433.723	539.623	672.253	584.875	855.88	832.453	403.787	424.4	370.158	699.357	1196.66	244.156	574.286	581.705	692.575	757.916	1217.31	1427.17	475.673	383.103	816.346
ACTA2	440.068	535.826	388.907	387.331	227.88	286.842	1030.84	274.558	297.338	687.603	302.494	321.675	261.045	1166.81	436.152	198.513	234.568	332.782	438.44	434.211	665.142	176.324	434.893	189.276	468.775	633.873	402.736	504.469	444.103	229.576	789.069	376.476	453.033	394.196	516.741	293.407	234.182	222.296	579.184	259.186	286.781	473.221	678.353	378.15	203.594	97.8113	244.094	270.845	364.606
ACTB	73797.1	74798.3	51280.3	65564.4	80327.5	114248	64440.9	36276.2	68119.7	129723	48370.8	114479	78562.5	70418.8	104838	96534.4	149316	59044.8	64556.8	91841.6	76849.4	100334	54256	47616.7	30741.4	157597	43583.8	40249.5	43968.8	42367.9	75977.3	53756.2	42014.1	50806.8	31575.7	98009.7	89342.2	48869.3	83512.7	49660.6	85452.4	58157.9	102188	110733	170436	34067.2	68742.5	84383.8	140614
ACTG1	81386.7	68065.6	28254.3	48944.8	33937.1	79504.1	44058.8	35158.7	31169.1	23566.2	46411.9	39480.5	32764.1	62783.3	56341.3	66677.2	60316.5	74546.1	57407.2	64509.9	45873.8	42102.1	17640.1	35152.3	43569.4	74976.3	23514.8	32648.1	52568.2	37929.3	74494.4	41574.4	31663.1	35739.6	30293.7	53458.1	53307	74727.7	55941.9	40502.2	75103.8	48190.8	40005.8	77896.8	48411.1	57905.7	35186.4	87671.5	41901.9
ACTL6A	565.953	1008.56	993.506	661.157	773.392	699.588	981.853	1056.26	988.611	703.698	819.354	662.338	669.62	1010.42	1127.8	437.133	605.755	873.908	832.8	144.462	973.975	866.207	808.636	1226.3	1166.67	343.042	754.066	1027	1114.04	1079.25	730.913	1065.16	729.443	1104.91	846.132	1212.85	1001.43	706.493	1063.7	883.117	905.714	1099.3	762.181	756.918	713.076	750.943	904.923	414.421	323.077
ACTN1	12259.3	9589.3	4559.52	9243.4	1561.4	7234.57	6001.91	4151.71	864.185	3852.66	4914.37	2087.01	1499.82	2689.58	1704.96	4535.91	9396.4	5689.12	7967.2	2047.62	1175.87	3360	1523.45	6283.38	2391.89	3210.36	1186.75	3730.45	1348.93	3837.74	13451.6	2563.15	2557.91	3253.58	3339.55	2711.23	3092.54	10764.2	3528.14	4021.64	10345.7	3317.44	4133.41	10518.1	8622.77	3685.28	3481.77	8379.46	2371.15
ACTN4	9921.47	10445.3	10222.9	9232.02	5670.56	8575.79	10075.1	8961.32	6413.12	14193.8	8369.15	5949.87	6399.17	11313.4	11193.7	15269.2	11361.5	4220.36	7747.9	11196.5	7718.58	8721.74	8781.7	9467.82	5709	9251.35	5184.21	9466.29	6955.3	7646.52	9654.73	12298.3	9798.54	7395.71	5884.12	7869.42	9674.92	9124.8	11089.4	6839.71	9086.08	8135.06	8169.69	9255.3	12122.4	7800.94	5462.27	14074.9	6987.6
ACTR10	482.525	513.284	468.615	372.167	615.497	681.07	499.714	515.171	503.825	435.538	551.792	1272.73	469.067	690.625	547.927	658.332	523.022	640.7	468.8	434.457	701.893	546.897	520.39	679.918	584.685	676.375	645.111	526.359	691.033	550	542.831	525.342	640.141	595.472	575.156	664.504	501.435	492.404	599.258	695.238	603.809	548.866	563.805	427.824	544.685	678.491	579.958	345.958	913.462
ACTR1A	1589.63	1590.88	1472.94	1217.81	1595.03	1242.8	1319.58	1350.19	1303.42	2614.41	1212.36	1259.74	1455.18	1880.21	2135.28	1959.2	2252.52	1272.27	1292.8	3573.03	1858.04	1486.9	1525.38	1601.43	1424.32	2409.92	1280.03	1089.46	1689.08	1489.62	1619.18	1415.12	1519.01	1266.42	1134.25	1559.38	1679.34	1247.96	1631.42	1314.29	1432.38	1178.26	1778.42	1542.76	1923.8	1677.74	1262.18	1914.79	1960.58
ACTR1B	930.101	906.501	1132.03	805.119	551.17	706.79	1126.27	1215.55	1046.4	1512.89	1527.3	2214.29	961.455	1235.42	978.926	1472.03	1278.42	995.906	1223.2	2787.59	1108.83	1334.48	708.04	659.531	823.423	1484.36	843.425	1106.92	715.4	829.245	930.168	1069.99	1393.46	1341.13	781.869	994.16	975.61	875.088	1294.37	942.857	813.333	1152.46	849.188	668.163	919.097	798.491	893.485	2434.81	677.885
ACTR2	6021.42	4666.58	4243.51	3461.48	9997.08	8016.46	7857.12	3683.31	6811.49	4435.54	6341.66	6770.13	7255.89	8855.21	6480.63	3931.56	5293.53	6485.01	5713.6	1964.15	8346.21	7966.21	8719.92	8743.12	6825.23	4148.87	10010.6	6342.95	8760.23	5312.26	5000	7025.74	6705.57	9052.08	7083.95	8607.4	8706.6	9382.44	7641.31	9869.26	5989.52	5370.6	13438.5	6350.54	7017.87	6791.7	7160.66	2781.5	11276
ACTR3	4427.28	3097.71	3008.66	3834.71	8671.05	4195.47	4030.56	2768.65	3789.9	3908.65	3402.86	3532.47	3825.17	3490.62	4776.34	2761.05	4774.1	3344.59	3088	3550.56	4879.34	4568.97	3821.67	4360.86	3777.48	2272.92	3880.85	3820.47	4913.26	3306.6	3900.37	3969.43	3638.37	4104.15	3562.32	4687.22	5203.01	6071.2	3912.18	4658.01	3765.71	3691.95	6126.45	4200.45	4844.78	5029.43	5391.19	2897.31	6584.62
ACTR3B	100.338	94.052	146.104	83.1778	283.626	69.9588	246.8	130.847	113.547	129.07	254.403	89.6104	137.922	241.667	175.391	82.9499	84.8921	88.8017	65.6	90.4227	135.647	143.448	53.1997	217.125	216.216	76.5912	107.388	259.964	112.086	102.83	104.283	202.735	216.623	264.906	170.298	150.552	93.9742	32.1133	215.832	198.268	128.571	80.5317	125.29	99.7258	60.207	67.1698	137.925	67.7349	17.3077
ACTR3C	3.3822	3.0017	25.974	5.3319	38.0117	0	20.6304	34.134	71.3921	23.5745	22.8086	32.4675	15.9909	16.6667	24.4731	17.1166	4.3165	12.4488	2.4	8.0257	22.8707	28.2759	30.9526	19.368	31.5315	77.6699	28.2187	45.9301	19.4932	15.0943	1.8622	28.1577	38.0195	34.717	41.7711	20.1168	25.1076	23.193	7.4212	45.0216	3.8095	19.5465	19.7216	0.9973	2.8222	27.1698	34.9859	33.5033	0
ACTR5	352.875	343.19	335.498	404.159	182.749	291.152	249.857	494.311	338.603	217.475	357.919	110.39	251.857	123.958	257.648	491.116	296.403	429.07	329.6	398.074	261.83	244.138	213.766	250.764	287.387	94.9299	265.726	401.429	276.803	460.377	285.847	310.539	343.059	292.83	253.84	334.848	285.509	253.338	278.293	189.61	358.095	376.075	138.051	322.114	272.813	440	294.688	540.422	161.538
ACTR6	372.728	390.216	282.467	261.264	286.55	352.881	407.259	313.527	411.355	217.475	358.796	384.416	240.53	448.958	380.693	234.366	210.791	417.451	404.8	118.245	518.927	367.731	354.987	365.953	357.658	143.474	465.608	353.662	472.71	451.887	369.646	444.891	557.029	404.528	430.564	438.027	355.811	293.48	386.518	401.732	351.429	377.639	221.578	354.026	247.413	415.849	415.121	120.175	273.077
ACTR8	434.047	619.342	508.658	455.345	726.608	437.243	785.482	568.268	782.594	543.981	679.871	183.117	535.696	473.958	655.337	264.649	449.64	624.101	608	377.207	723.186	732.414	733.189	531.091	546.847	351.672	725.064	783.568	674.464	583.962	543.762	774.739	820.513	657.359	673.693	786.502	705.165	655.647	440.94	662.338	700.952	461.298	460.557	509.599	495.767	563.774	610.234	303.714	237.5
ACVR1	65.389	374.207	313.853	53.3191	211.988	36.0082	385.1	364.096	154.343	84.2788	328.092	680.519	266.516	435.417	176.071	312.05	148.201	186.732	544.8	234.885	171.924	202.069	472.994	332.314	309.91	175.836	157.554	504.313	700.78	409.434	454.376	684.634	579.134	289.057	556.948	151.849	116.212	269.395	294.372	340.26	150.476	338.546	386.311	271.254	463.782	689.811	300.071	323.38	474.038
ACVR1B	1042.84	1035.57	613.636	863.77	166.667	1316.87	654.823	978.508	1206.19	539.266	289.493	759.74	627.644	307.292	403.127	546.416	1446.76	1095.5	882.4	1147.67	1675.08	828.276	385.94	522.936	207.207	1048.54	168.528	614.545	873.294	783.962	1476.72	399.839	266.136	142.642	668.337	547.696	936.155	793.913	195.424	331.602	1034.29	790.461	1104.41	861.63	1380.06	793.207	282.578	1135.47	1168.27
ACVR1C	7.8918	5.0028	3.2468	4.2655	14.6199	1.0288	6.8768	8.2174	13.5985	2.9468	50.8807	3.8961	1.3326	13.5417	3.399	3.95	7.1942	16.5984	12.8	2.6752	22.8707	16.5517	6.7709	22.4261	27.027	6.4725	4.7031	8.2674	0.9747	11.3208	7.4488	20.1126	15.0309	2.2642	16.0658	9.085	5.7389	10.7044	1.8553	0.8658	14.2857	14.8554	11.6009	10.9698	16.9332	9.8113	53.1516	4.37	14.4231
ACVR2A	42.841	64.0354	172.078	74.6468	131.579	166.667	58.0707	84.0708	44.1951	22.3958	126.324	158.442	17.9898	113.542	40.1088	31.5999	20.1439	129.468	64	47.084	56.7823	39.3103	67.7087	108.053	160.36	43.1499	137.958	85.43	218.324	87.7358	53.0726	82.864	75.1547	43.7736	130.669	49.9676	69.5839	66.0107	24.1187	69.2641	85.7143	87.5684	169.374	46.8711	31.0442	207.547	217.316	98.3248	100
ACVR2B	23.6753	39.0216	663.42	42.6553	20.4678	19.5473	115.377	801.517	51.6743	21.217	164.046	484.416	413.099	61.4583	12.2366	239.633	21.5827	83.8221	61.6	47.619	63.0915	68.2759	59.0033	97.8593	224.324	62.5674	94.8462	244.348	1062.38	735.849	35.3818	94.1271	98.1432	55.0943	154.232	44.7761	15.7819	43.7098	11.7502	296.104	58.0952	838.155	258.701	53.8519	104.421	477.736	337.075	193.008	50.9615
ACVRL1	4.5096	3.0017	3.2468	19.1949	1.462	16.4609	6.8768	4.4248	29.2368	18.2702	0	1.2987	0.6663	0	44.1876	0	0	7.4693	2.4	1.6051	123.817	23.4483	0.9673	10.1937	0.9009	11.8662	3.9193	7.3488	0	2.8302	14.8976	1.609	0.8842	0	1.0711	20.1168	11.4778	8.0283	25.3556	0.8658	18.0952	3.9093	13.9211	4.9863	12.2295	61.1321	17.4929	8.0117	45.1923
ACY1	368.658	380.72	201.299	292.189	111.111	251.461	415.664	284.93	350.841	512.156	427.222	149.351	304.494	384.375	288.769	439.766	338.849	265.359	264.8	437.667	410.095	393.793	121.663	413.863	446.531	531.823	146.58	298.261	203.704	252.83	227.868	387.667	202.476	301.132	265.621	256.327	257.353	162.351	389.178	201.732	197.143	422.987	216.937	187.315	115.372	210.566	192.826	369.993	64.4231
ACY3	2.2548	133.073	3.2468	0	618.421	3.0864	29.7994	0	121.707	1567.7	73.6892	366.234	97.9445	127.083	375.255	22.3833	2.8777	20.7481	15.2	512.574	35.489	377.931	244.719	2.0387	19.8198	1050.7	32.138	83.5928	0	0	7.4488	34.5937	43.3245	280.755	78.1869	850.746	796.987	23.193	335.807	225.108	115.238	1.5637	18.5615	138.619	19.7554	461.132	526.133	606.701	59.6154
ACYP1	74.4081	114.063	141.775	78.9123	116.959	126.543	143.649	190.266	146.184	92.5298	121.061	422.078	146.584	84.375	107.41	185.65	63.3094	151.046	124.8	37.9882	115.931	103.448	55.1343	71.3558	86.4865	155.34	99.5493	169.023	128.655	183.019	67.0391	115.044	141.468	209.811	126.384	154.445	124.821	98.124	230.674	151.515	86.6667	272.088	69.6056	76.7888	70.555	114.717	114.377	96.8682	110.577
ACYP2	64.2616	112.062	37.8788	57.5846	35.0877	75.1029	62.6552	65.1075	74.1118	55.4	37.7219	209.091	36.6459	119.792	62.5425	64.5166	41.7266	116.189	81.6	70.091	119.085	75.8621	62.8724	137.615	68.4685	195.254	44.6796	71.651	97.4659	104.717	87.5233	56.3154	82.2281	102.641	124.242	69.4354	63.8451	48.17	75.4484	99.5671	38.0952	67.24	93.9675	57.8409	30.1035	46.7925	41.7139	69.1916	51.9231
ADA	742.954	1914.06	3781.39	1515.33	1393.27	579.218	1246.99	4085.97	955.975	2326.21	911.466	4061.04	2974.98	1784.38	3490.14	5516.82	647.482	1019.97	1602.4	1271.8	1011.04	895.172	2320.48	2171.25	543.243	1142.39	1153.05	3084.67	3834.31	3788.68	1150.84	2742.56	2023.87	916.226	997.151	1551.59	2426.83	1494.16	1983.92	1125.54	1015.24	4888.19	191.415	1438.05	175.917	1518.49	1187.5	1514.2	444.231
ADAL	152.198	161.089	221.862	118.368	304.094	171.811	273.543	294.564	207.377	174.451	169.31	44.1558	189.892	140.625	343.984	81.6332	73.3813	219.929	198.4	38.5233	177.445	173.103	283.409	261.978	302.703	70.1187	184.205	262.72	223.197	229.245	213.222	169.751	237.843	260.377	262.408	242.7	163.558	143.618	168.831	294.372	192.381	262.705	178.654	204.438	136.406	176.604	202.514	63.3649	62.5
ADAM10	2219.84	1480.82	1414.5	2164.76	3671.05	1556.58	2400.76	1595.45	3176.61	2038.6	2619.48	1383.12	3257.49	1050	2493.54	605.666	1862.59	1818.36	2614.4	660.246	2660.88	3053.1	3212.3	2608.56	2401.8	1308.52	3683.32	2013.58	1690.06	1479.25	3118.25	2152.05	1908.93	2543.4	2548.04	2415.96	2938.31	3846.46	2398.27	3552.38	3298.1	1612.2	3732.02	3122.41	2830.67	2816.6	2198.73	1388.93	2895.19
ADAM11	55.2424	121.067	177.489	24.5268	102.339	37.037	17.574	185.209	11.5587	70.1341	45.6171	90.9091	15.3246	28.125	52.3453	43.4499	23.741	49.7953	81.6	63.6704	20.5047	23.4483	152.828	23.4455	37.8378	55.0162	62.7082	93.6975	9.7466	59.434	82.8678	65.1649	69.8497	45.283	53.5527	65.5419	99.7131	45.4939	32.7767	36.3636	37.1429	23.4558	19.7216	46.8711	16.9332	296.604	6.728	141.296	16.3462
ADAM12	23.6753	27.0149	51.9481	41.5889	102.339	4.1152	21.3945	32.8698	4.7595	20.6277	63.1622	16.8831	11.3269	8.3333	38.0693	6.5833	4.3165	21.578	32.8	3.7453	20.5047	21.3793	8.7054	46.8909	64.8649	4.315	21.9479	68.8952	62.3782	36.7925	39.1061	49.0748	47.7454	14.3396	42.8421	25.9572	26.5423	16.0567	12.3686	40.6926	39.0476	12.5098	34.8028	28.9205	26.3405	17.3585	20.1841	22.5783	15.3846
ADAM15	1573.84	1277.71	1023.81	3539.32	290.936	1329.22	1603.06	1826.8	2664.4	1323.98	1971.19	653.247	3084.78	1606.25	1006.8	2329.18	2911.04	587.585	1868	4297.74	2633.66	2834.76	262.13	1062.18	1349.55	2720.6	1233	1507.43	398.635	980.189	1191.81	1650.84	1794.43	1763.02	1177.79	1060.67	1418.94	2805.46	3098.95	972.294	1040	1430.33	1459.4	1209.67	2134.01	1704.91	1348.58	8719.53	1559.62
ADAM17	1635.85	956.529	1591.99	1357.5	1071.64	1147.12	1344.03	1115.04	1434.64	631.207	1265.88	898.701	1155.35	1319.79	761.387	1765.65	1841.01	1055.66	1148.8	1537.72	1739.75	1573.79	1098.82	1364.93	1313.51	905.07	1179.7	1284.21	2898.64	2170.75	1525.14	1170.56	1526.08	1468.68	2400.23	807.268	842.181	1573.55	1047.62	1649.35	1373.33	1569.19	1462.88	1426.08	3132.64	1098.11	795.255	1008.74	2186.54
ADAM19	67.6437	260.144	380.952	288.99	93.5673	79.2181	187.966	107.459	91.11	426.109	967.61	50.6494	35.3133	95.8333	105.371	119.817	123.741	247.317	217.6	215.623	141.167	261.379	282.442	218.145	250.451	96.0086	123.065	87.2672	51.6569	86.7925	94.9721	322.607	233.422	95.8491	92.1106	806.619	352.224	56.1983	90.9091	37.2294	300	293.98	155.452	309.15	583.255	89.0566	741.431	431.173	150
ADAM20	14.6561	17.0094	12.987	50.12	102.339	20.5761	10.6972	11.378	12.2387	1.7681	11.4043	24.6753	5.9966	14.5833	16.3154	1.3167	1.4388	23.2378	17.6	10.1659	7.0978	6.2069	22.2472	1.0194	21.6216	12.945	6.2708	18.3721	7.7973	14.1509	18.622	7.2405	13.2626	9.0566	18.2079	9.7339	4.3042	13.3806	5.5659	11.2554	16.1905	6.2549	30.1624	8.9753	11.2888	12.8302	0.6728	26.22	13.4615
ADAM21	13.5287	3.0017	6.4935	38.3898	54.0936	1.0288	11.4613	5.689	12.2387	5.8936	16.6678	3.8961	2.6652	21.875	4.7587	1.3167	0.7194	4.1496	8	0.535	5.5205	6.2069	42.5598	19.368	17.1171	6.4725	3.9193	13.779	7.7973	5.6604	6.5177	12.8721	17.6835	3.7736	8.5684	5.8404	10.043	6.2443	2.4737	4.329	10.4762	10.9461	6.9606	10.9698	5.6444	6.7925	5.3824	8.74	0
ADAM22	34.9493	83.0459	27.0563	154.625	36.5497	52.4691	93.9828	85.335	33.9963	11.7872	70.1802	1.2987	14.6584	6.25	30.5914	5.2667	77.6978	45.6457	706.4	6.9556	38.6435	73.1034	70.6105	77.472	34.2342	15.1025	81.5207	92.7789	72.1248	21.6981	85.6611	62.7514	61.008	6.0377	21.4211	75.2758	25.825	33.0054	64.9351	10.3896	24.7619	17.9828	3.4803	108.701	139.229	72.4528	59.8796	44.4283	17.3077
ADAM23	2.2548	3.0017	0	5.3319	4.386	0	1.5282	2.5284	0	0	21.0541	0	0	0	0.6798	0	0	57.2646	4.8	0.535	2.3659	6.8966	8.7054	4.0775	6.3063	2.1575	1.5677	0.9186	0	1.8868	0	4.0225	0	0	1.0711	1.2979	0.7174	0.892	0	0	1.9048	0.7819	3.4803	0.9973	0	0.7547	4.7096	2.185	0
ADAM28	75.5355	354.196	574.675	153.559	1508.77	40.1235	1463.23	1431.73	471.868	397.23	1013.23	594.805	417.097	1131.25	387.491	750.499	103.597	214.95	78.4	1173.89	1582.81	686.897	1050.45	1326.2	1218.02	606.257	6484.81	1661.75	1613.06	1273.58	85.6611	1541.43	1746.24	1949.43	2194.59	1393.25	890.244	379.116	2494.74	1670.13	232.381	1201.72	534.803	216.405	501.411	1535.09	2370.29	2168.97	1662.5
ADAM32	4.5096	0	0	7.4647	5.848	0	0.7641	1.2642	2.0398	0	0	3.8961	0	0	0.6798	0	3.5971	6.6394	2.4	0	0	22.069	0	0	38.7387	0	2.3516	15.6162	0	0	0.9311	0.8045	1.7683	0	0	0	0	8.9204	1.8553	0	0	0.7819	1.1601	2.9918	0	0	5.3824	2.9133	0
ADAM6	10710.3	6517.97	36497.7	25375.9	1064.93	4565.14	20169.4	26789.9	5111.66	6869.17	26830	18882.2	1996.62	9205.82	16336.6	9401.31	5734.86	18390.5	7351.22	31199.4	32079.9	8379.97	14010.2	34555.1	17099.3	5376.61	10474.2	21667.2	617.7	2950.97	42994.8	12315.3	1776.81	4879.37	4247.81	28886	7041.24	11918.6	6651.05	2800.34	34987.3	224725	43081.6	18929.6	7727.9	13422.1	41094.9	87202.2	2966.35
ADAM8	1560.32	865.478	471.861	343.375	84.7953	2190.33	592.932	451.327	948.496	721.379	2013.29	271.429	789.553	1741.67	144.12	448.983	4866.91	1301.32	508.8	13105.4	1013.41	1309.66	210.864	264.016	888.288	3778.86	235.94	1367.8	228.07	314.151	1233.71	1379.73	1305.92	433.962	887.904	319.922	240.316	138.266	406.926	663.203	931.429	420.641	2877.03	1565.69	8991.53	2138.87	1740.55	8162.42	5405.77
ADAM9	508.455	194.107	297.619	778.459	125.731	533.951	77.1729	80.9102	27.8769	138.5	51.7579	519.481	330.479	52.0833	166.553	263.333	662.59	384.254	549.6	1324.77	156.94	323.448	11.6072	47.9103	138.739	78.7487	611.405	329.778	154.971	203.774	575.419	83.6685	48.6295	89.0566	31.0606	411.421	253.228	950.019	897.959	35.4978	603.809	329.945	723.898	686.113	637.817	436.226	378.789	407.138	739.423
ADAMDEC1	1.1274	1.0006	1.0823	3.1991	0	2.0576	6.1127	0.6321	0	4.7149	9.6498	5.1948	0	8.3333	2.7192	27.65	0.7194	0.8299	0	44.9438	0.7886	1.3793	1.9345	2.0387	9.9099	0	20.3802	5.5116	5.848	4.717	1.8622	17.6991	5.305	29.434	1.0711	3.8936	2.1521	9.8124	13.6054	7.7922	4.7619	27.3651	18.5615	0	0	3.7736	6.728	0	7.6923
ADAMTS1	268.32	327.181	7.5758	53.3191	0	115.226	351.48	995.575	7.4792	7.0723	56.1442	3.8961	0.6663	0	8.8375	276.5	342.446	847.35	58.4	2.6752	7.0978	4.8276	7.7381	197.757	48.6486	2.1575	1.5677	13.779	446.394	7705.66	402.235	377.313	34.4828	3.7736	24.6342	3.8936	1.4347	0	1.2369	1.7316	734.286	1064.11	15.0812	652.206	265.287	11.3208	71.3173	189.366	0
ADAMTS10	50.7328	898.496	80.0866	126.9	665.205	13.3745	19.8663	91.024	24.4773	419.036	169.31	27.2727	12.6595	8.3333	627.464	64.5166	128.777	302.092	532.8	149.813	31.5457	66.2069	777.683	18.3486	37.8378	61.4887	54.0858	10.1046	14.6199	17.9245	312.849	27.3532	36.2511	9.8113	42.8421	111.616	553.802	82.9594	193.568	41.5584	388.571	39.8749	13.9211	546.497	122.295	1248.3	1178.08	495.266	70.1923
ADAMTS13	200.676	141.078	133.117	163.156	30.7018	83.3333	89.3983	212.389	83.6308	67.1873	95.6205	32.4675	69.2941	35.4167	78.8579	64.5166	127.338	83.8221	148.8	86.6774	132.492	81.3793	66.7415	25.4842	43.2432	94.9299	87.0076	110.232	57.5049	117.924	77.2812	79.646	168.877	68.6792	36.4158	94.7437	121.951	42.8178	69.2641	39.8268	100.952	39.093	19.7216	145.6	87.4882	89.8113	106.303	152.221	53.8462
ADAMTS14	12.4014	561.31	43.29	79.9787	39.4737	26.749	391.213	338.812	4.7595	210.992	338.62	50.6494	0.6663	135.417	276.683	73.7332	34.5324	66.3938	653.6	249.331	45.7413	6.8966	107.367	34.6585	140.541	28.0475	10.9739	555.755	1230.02	1716.04	53.0726	553.5	2152.96	1648.3	216.353	358.209	181.492	168.595	128.015	85.7143	142.857	236.904	85.8469	183.495	203.198	52.0755	43.7323	84.4865	101.923
ADAMTS15	108.23	221.122	0	36.257	7.3099	25.7202	0	0.6321	0	10.0192	0	0	24.6527	0	61.1829	0	35.2518	50.6252	207.2	0	0	0	1.9345	0	0	1.0787	0	0.9186	0	0.9434	103.352	0	0	0	0	0	6.4562	3.5681	0	0.8658	127.619	0	2.3202	72.7998	28.222	1.5094	0	0.7283	0
ADAMTS17	40.5862	34.0188	9.7403	45.8544	2.924	7.2016	6.8768	6.9532	8.839	11.1979	27.1948	3.8961	1.3326	2.0833	14.9558	10.5333	2.1583	26.5575	16.8	17.1215	26.8139	4.8276	18.3781	9.1743	17.1171	3.2362	3.9193	26.6395	9.7466	6.6038	53.0726	12.0676	12.3784	4.5283	12.8526	11.0318	7.891	7.1363	5.5659	6.0606	30.4762	23.4558	8.1206	120.668	11.2888	16.6038	31.6218	9.4683	1.9231
ADAMTS18	316.798	93.0514	2.1645	832.845	2.924	106.996	22.9226	1.2642	0	0.5894	7.8953	0	0	0	2.0394	5.2667	108.633	0.8299	517.6	0	1.5773	0	19.3454	0	21.6216	1.0787	108.172	14.6976	0	0	5.5866	0	0	0	222.779	7.1382	57.3888	0	0	55.4113	537.143	0	0	380.952	0	16.6038	0	0	0
ADAMTS2	116.122	694.384	2.1645	445.748	0	78.1893	0	0.6321	348.802	6.483	2.6318	2.5974	33.3145	0	8.8375	0	48.2014	135.277	738.4	193.151	18.9274	0	0	2.0387	0.9009	119.741	3.1354	6.4302	11.6959	11.3208	339.851	3.218	1.7683	3.0189	0	1.2979	1.4347	0.892	21.0266	0	113.333	19.5465	64.9652	801.795	536.218	40.7547	8.0737	2.185	6.7308
ADAMTS3	11.274	77.0426	42.2078	17.0621	1543.86	29.8354	4.5845	46.1441	143.464	68.366	113.166	3.8961	0	0	169.273	5.2667	15.1079	18.2583	7.2	4.8154	30.7571	91.7241	2.9018	77.472	144.144	2.1575	124.633	16.5348	76.0234	2.8302	87.5233	20.9171	27.4094	0.7547	2.1421	71.3822	119.082	979.456	0	6.0606	175.238	3.1274	0	244.328	8.4666	0	143.98	62.6366	0.9615
ADAMTS4	29.3123	18.01	2.1645	19.1949	1.462	21.6049	1.5282	2.5284	3.3996	16.5021	5.2635	1.2987	0.6663	0	6.1183	2.6333	1.4388	11.6189	60.8	2.1402	2.3659	3.4483	0.9673	10.1937	1.8018	1.0787	0.7839	9.186	2.924	0	41.8994	8.0451	1.7683	2.2642	0	16.2232	4.3042	0.892	8.0396	4.329	23.8095	0.7819	9.2807	42.8821	2.8222	2.2642	10.0921	4.37	0
ADAMTS5	4.5096	2.0011	7.5758	29.8587	1.462	15.4321	5.3486	23.3881	1.3599	1.1787	0	5.1948	0	0	12.9164	40.8166	0.7194	14.1087	1.6	2.6752	2.3659	0	0.9673	11.213	11.7117	0	0.7839	14.6976	0.9747	111.321	21.4153	9.6541	1.7683	3.7736	4.2842	0	3.5868	0.892	2.4737	2.5974	15.2381	6.2549	459.397	8.9753	0	0	8.0737	0	46.1538
ADAMTS6	13.5287	38.021	84.4156	9.5974	13.1579	18.5185	38.9685	20.8597	97.2293	71.3128	67.5485	85.7143	972.782	32.2917	27.1924	15.8	37.4101	22.4079	18.4	34.2429	13.4069	64.1379	3.8691	5.0968	48.6486	36.6775	900.647	25.7209	11.6959	33.0189	20.4842	40.2253	18.5676	112.453	129.597	109.02	137.016	7.1363	532.467	174.892	14.2857	24.2377	34.8028	19.9452	14.111	31.6981	147.344	95.4115	0
ADAMTS7	13.5287	98.0542	18.3983	1.0664	0	21.6049	5.3486	98.6094	42.8353	7.0723	6.1408	5.1948	201.219	6.25	19.7145	14.4833	2.1583	42.326	15.2	16.5864	52.0505	442.759	6.7709	10.1937	0.9009	149.946	25.0833	26.6395	230.994	360.377	314.711	7.2405	24.7569	1.5094	6.4263	2.5957	5.0215	0.892	2.4737	2.5974	55.2381	29.7107	9.2807	51.8574	57.3848	11.3208	8.0737	6.555	0
ADAMTS9	19.1657	2.0011	9.7403	42.6553	2.924	17.4897	2.2923	4.4248	1.3599	8.2511	2.6318	5.1948	0	0	57.7838	0	0	5.8095	24.8	0.535	10.2524	0	0	60.1427	6.3063	0	3.9193	13.779	0	0	75.419	0	0.8842	0	0	7.1382	5.7389	0.892	1.2369	0	68.5714	0.7819	17.4014	62.8272	0	0	28.2578	0	0
ADAMTSL2	5.637	28.0155	0	4.2655	0	6.1728	2.2923	0.6321	15.6383	0	18.4223	0	6.6629	18.75	25.153	0	0	4.9795	49.6	6.9556	7.8864	0	2.9018	0	5.4054	20.4962	0	12.8604	3.8986	0	2.7933	13.6766	17.6835	15.0943	28.9184	0	0.7174	0	4.329	9.5238	4.7619	0	32.4826	16.9534	4.7037	0	0	0	0
ADAMTSL4	1834.27	2957.63	530.303	1289.26	64.3275	898.148	1592.36	415.297	4181.54	448.505	747.419	528.571	618.983	1176.04	48.2665	406.849	5710.07	608.333	2411.2	3699.84	5261.04	3971.72	49.3307	291.539	341.441	5585.76	248.481	1097.73	603.314	1156.6	1138.73	2219.63	4399.65	3984.91	695.114	357.56	335.724	2972.27	2870.13	387.013	1381.9	645.035	993.039	1228.62	8214.49	390.189	292.67	1150.76	2348.08
ADAMTSL5	1.1274	13.0072	2.1645	3.1991	0	5.144	3.8204	5.689	2.0398	3.5362	35.9674	3.8961	0.6663	0	0.6798	6.5833	4.3165	4.1496	7.2	12.306	9.4637	10.3448	3.8691	9.1743	171.171	0	3.9193	0.9186	6.8226	2.8302	0.9311	19.3081	0	1.5094	1.0711	5.1914	0	0.892	1.2369	0	5.7143	17.2009	23.2019	2.9918	6.5851	22.6415	26.2394	15.295	0
ADAP1	337.091	308.17	298.701	225.007	17.5439	289.095	171.92	225.417	530.335	651.245	218.436	635.935	566.346	316.927	121.006	612.249	778.05	193.812	256	2278.22	187.697	457.931	55.1343	181.447	99.4324	567.422	86.2238	187.441	119.308	375.472	463.687	139.984	234.306	429.819	185.774	312.135	360.337	179.299	748.299	358.017	497.143	298.374	1003.48	427.106	1182.5	146.415	400.319	265.113	1851.92
ADAP2	19.1657	43.0238	54.1126	15.9957	62.8655	11.3169	35.9121	15.1707	136.665	128.481	14.9133	29.8701	31.9819	91.6667	135.282	52.6666	8.6331	36.5166	8	329.053	59.1483	177.241	24.1817	31.6004	17.1171	392.664	67.4113	93.6975	68.2261	21.6981	51.2104	57.1199	32.7144	49.8113	10.7105	245.944	220.23	113.289	233.148	52.8139	40.9524	66.4582	634.571	49.8629	62.0884	80	86.119	9.4683	941.346
ADAR	6373.17	6684.69	7865.8	7030.66	9078.95	5313.79	10004.2	8154.24	10254.6	10398.7	10065.6	2790.91	10432.1	6581.25	11231.8	6556.99	6774.82	6514.89	6228.8	8056.71	9820.19	10513.1	18297.8	8672.78	7912.61	7227.62	9073.09	8294.98	7810.92	7016.98	8708.57	9180.21	8944.3	8317.74	8028.62	9966.9	9889.53	9361.93	7515.77	8517.75	8800.95	6171.23	7316.71	8690.1	7038.57	9024.15	10069.2	6753.1	7679.81
ADARB1	652.762	813.449	1308.44	926.686	644.737	931.07	1217.19	1925.41	87.7104	932.96	1465.01	502.597	295.166	570.833	614.548	1036.21	553.237	1097.99	1231.2	443.553	310.726	180	1056.26	1063.2	1442.34	190.939	1052.71	1395.36	1038.01	2007.55	947.859	1139.98	885.942	990.189	1776.88	721.609	574.606	1231.9	479.901	962.771	572.381	1777.95	592.807	788.831	1205.08	318.491	1014.59	1665.7	579.808
ADARB2	22.5479	0	4.329	2.1328	1.462	18.5185	2.2923	36.6625	18.358	1.1787	7.8953	7.7922	0	6.25	0	1.3167	0	4.9795	7.2	0	3.1546	1.3793	7.7381	9.1743	7.2072	15.1025	54.0858	2.7558	1.9493	0	39.1061	0	0	7.5472	11.7816	0	0.7174	2.6761	6.8027	2.5974	9.5238	0.7819	1.1601	34.904	0	75.4717	115.05	32.0466	7.6923
ADAT1	500.564	494.273	540.043	524.66	527.778	403.292	559.312	531.606	482.747	406.66	596.532	185.714	507.712	405.208	526.852	341.016	375.54	410.811	453.6	169.074	522.082	547.586	436.238	400.612	499.099	318.231	380.168	705.487	462.963	601.887	359.404	632.341	478.338	455.849	545.166	420.506	562.41	465.643	523.809	414.719	378.095	516.028	455.916	401.895	445.908	451.321	559.101	289.876	423.077
ADAT2	801.578	1040.57	1146.1	1648.63	2121.34	1100.82	871.824	956.384	1179.67	1032.56	1573.79	507.792	1448.51	742.708	1315.43	597.766	718.705	1597.6	1196.8	745.853	960.568	1401.38	901.494	666.667	1561.26	322.546	1380.36	1820.67	497.076	1047.17	946.927	1204.34	1223.7	1256.6	1761.88	1384.17	969.154	725.226	737.168	1398.27	940.952	1153.24	553.364	1496.88	567.263	1443.02	1202.98	1195.19	223.077
ADAT3	57.4972	102.056	116.883	63.9829	23.3918	41.1523	68.7679	85.335	73.4319	222.779	81.5845	87.013	55.9683	37.5	56.4242	100.067	140.288	44.8158	75.2	245.051	68.612	64.1379	44.4943	38.736	71.1712	74.4337	36.0572	52.3603	34.1131	61.3208	94.9721	61.9469	57.4713	67.1698	42.8421	64.244	123.386	45.4939	59.3692	27.7056	80.9524	47.6935	40.6032	115.682	118.532	65.6604	61.898	253.46	78.8462
ADC	59.752	339.187	72.5108	65.0493	2.924	12.3457	11.4613	126.422	17.6781	10.6085	60.5304	27.2727	12.6595	16.6667	8.1577	32.9166	28.777	119.509	80.8	6.4205	83.5962	24.1379	17.4108	53.0071	23.4234	2.1575	24.2994	40.4185	110.136	465.094	108.007	50.6838	15.9151	8.3019	24.6342	64.8929	8.6083	14.2726	19.7897	17.316	93.3333	56.294	20.8817	54.8492	126.999	50.566	56.5156	10.1966	26.9231
ADCK1	245.772	202.112	243.506	203.679	160.819	164.609	181.089	341.34	152.983	308.236	231.595	115.584	165.24	273.958	269.205	132.983	164.029	271.385	192	332.263	190.063	195.862	138.319	227.319	373.874	120.82	146.58	251.697	210.526	384.906	170.391	296.058	224.58	241.509	200.287	259.572	215.925	134.698	223.253	182.684	151.429	222.83	228.538	167.539	126.999	129.811	153.399	206.118	125.962
ADCK2	328.072	304.168	333.333	425.486	109.649	241.769	489.78	388.116	287.608	307.647	324.584	763.636	295.166	311.458	445.275	610.932	315.827	211.63	210.4	386.838	348.58	253.103	214.733	303.772	158.559	665.588	264.158	271.906	307.992	138.679	343.575	444.891	121.132	252.83	206.713	214.796	449.785	185.544	636.364	148.918	333.333	379.202	415.313	323.111	177.799	171.321	235.482	656.956	275.962
ADCK4	648.253	725.401	634.199	593.975	295.322	562.757	605.158	747.155	475.268	991.896	748.297	1163.64	455.075	534.375	422.162	768.932	860.432	593.394	588.8	908.507	527.602	545.517	346.282	307.849	542.342	1020.5	405.252	530.034	650.097	629.245	663.873	576.026	751.547	618.868	533.385	544.452	633.429	419.257	530.612	407.792	550.476	661.454	518.562	500.623	626.529	793.207	425.213	1680.99	316.346
ADCK5	59.752	202.112	121.212	114.103	24.8538	68.93	68.0038	204.172	93.1498	162.664	85.0935	107.792	93.2805	26.0417	78.1781	94.7998	225.899	151.876	172.8	360.086	94.6372	88.9655	24.1817	21.4067	61.2613	46.3862	70.5467	71.651	55.5556	166.981	100.559	108.608	87.5332	108.679	81.4001	104.478	87.5179	56.1983	211.503	31.1688	99.0476	180.61	75.406	76.7888	178.739	106.415	104.958	487.983	26.9231
ADCY1	4.5096	14.0077	53.0303	23.4604	17.5439	5.144	14.5177	97.3451	4.0796	2.9468	7.018	16.8831	3.3314	17.7083	12.9164	134.3	2.1583	3.3197	21.6	2.6752	2.3659	2.7586	4.8363	36.6972	13.5135	4.315	7.0547	65.2208	109.162	244.34	40.0372	28.9622	32.7144	56.6038	85.6843	4.5425	4.3042	0.892	8.0396	12.987	86.6667	194.683	26.6821	9.9726	14.111	6.0377	8.7465	5.0983	0
ADCY2	0	2.0011	7.5758	4.2655	0	1.0288	6.1127	6.9532	0	1.7681	211.418	0	0	13.5417	3.399	88.2165	0	3.3197	0.8	4.8154	1.5773	0	0.9673	444.444	32.4324	0	69.7629	710.08	240.741	1.8868	2.7933	534.996	198.939	78.4906	1117.11	1.2979	2.1521	0.892	6.8027	0.8658	2.8571	6.2549	0	0.9973	0	0	0.6728	1.4567	103.846
ADCY3	152.537	455.302	448.322	758.667	1530.98	89.6502	996.08	516.315	1360.72	2828.46	1072.12	75	3521.16	614.135	3218.55	323.399	356.813	149.129	902.648	1492.76	1033.81	1456.84	1142.89	491.998	490.712	2067.28	1359.24	792.451	80.0682	231.991	353.473	363.548	663.342	893.713	773.429	1561.2	1586.62	1568.95	2046.97	1170.35	538.4	401.837	777.993	1024.4	457.103	1155.71	1955.57	3032.2	511.279
ADCY4	126.268	10.0055	426.407	814.716	24.8538	124.486	35.148	242.099	11.5587	84.2788	53.5124	29.8701	31.3156	21.875	40.7886	371.299	38.1295	34.0268	8.8	470.84	20.5047	17.931	10.6399	16.3099	45.9459	9.7087	43.8957	58.7906	75.0487	289.623	25.1397	20.1126	97.2591	45.283	40.7	17.5211	139.885	235.498	124.923	19.9134	36.1905	202.502	95.1276	34.904	92.1919	183.396	34.313	300.801	229.808
ADCY6	157.835	195.108	1020.56	56.5183	26.3158	77.1605	641.834	1180.78	42.1554	195.668	230.717	361.039	1218.64	169.792	112.169	225.15	81.295	154.365	482.4	54.5746	173.502	396.552	1796.22	258.92	99.0991	1444.44	881.05	750.498	950.292	722.641	606.145	572.003	1846.15	360	168.155	59.0526	171.449	559.307	213.358	1150.65	954.286	91.4777	331.786	577.412	682.973	2702.64	655.985	2965.77	39.4231
ADCY7	1563.7	2766.53	3324.68	1971.74	3299.71	1795.27	1902.58	2881.8	588.135	4997.2	4086.24	1455.84	1681.71	984.375	4017.68	2321.28	4235.97	2725.46	2458.4	2989.83	588.328	848.276	4082.84	1601.43	4541.44	772.384	1918.87	2133.91	2316.76	2383.96	3011.17	2232.5	2755.97	3204.53	2573.74	4789.75	4617.65	2908.04	3849.1	3748.05	3909.52	2198.59	5143.85	3860.38	9676.39	6469.43	4632.26	5651.86	7936.54
ADCY9	977.452	1225.68	489.178	508.664	24.8538	826.132	39.7326	537.295	1170.15	81.9213	247.385	232.468	889.496	56.25	205.303	380.516	1549.64	798.385	1391.2	342.429	537.066	762.069	41.5925	46.8909	43.2432	1528.59	61.1405	240.674	172.515	650	1332.4	337.892	251.105	251.321	122.1	71.3822	204.448	71.3629	901.051	46.7532	1517.14	269.742	1294.66	1112.94	2175.92	134.34	176.275	76.4749	1080.77
ADCYAP1	0	0	9.7403	0	0	0	6.1127	0	13.5985	0	0	0	0	0	3.399	1.3167	0	0	0.8	2.1402	649.054	0	4.8363	2.0387	1.8018	2.1575	0	0	1.9493	0	0	0	1.7683	0	7.4974	0	0	0	0	0	0	0	0	0	0	0	0	0	0
ADD1	5016.91	4754.63	5376.62	5096.24	5222.22	3405.35	4653.3	4694.06	4059.15	7034.62	5527.57	3518.18	6609.59	4016.67	5804.89	4929.59	5194.24	4290.7	4227.2	5090.42	5101.73	5217.24	4661.26	4943.93	5463.96	8527.51	5766.02	5173.57	4520.47	4963.21	4911.55	5811.75	5734.75	5499.62	4787.61	5327.71	5695.12	4778.64	5821.89	4959.31	5045.71	4032.84	5184.45	4952.38	6829.73	5295.09	5134.85	6457.39	6060.58
ADD2	83.4273	210.116	369.048	448.947	178.363	146.09	499.714	524.652	33.9963	2691.03	305.284	135.065	1547.12	70.8333	2285.52	279.133	40.2878	338.608	307.2	3.2103	43.3754	28.9655	50.2979	2823.65	3941.44	6.4725	125.416	52.3603	8.7719	39.6226	56.797	971.842	14.1468	21.8868	84.6132	727.45	1081.06	1333.6	7.4212	157.576	818.095	216.575	914.153	137.621	26.3405	4.5283	1063.7	148.58	22.1154
ADD3	1043.97	583.322	1793.29	1803.25	2730.99	1461.93	1683.29	1549.3	2249.87	1596.58	3470.41	798.701	3456.04	1397.92	1874.24	1487.83	1202.88	1392.61	824	913.323	3291.8	3340.69	3503.44	2095.82	2167.57	1654.8	4597.3	2300.18	2221.25	1714.15	1549.35	2371.68	2089.3	3297.36	2971.1	2791.04	2776.9	4232.71	3372.91	1686.58	1273.33	2311.18	2958.24	1060.08	2607.71	4687.55	4682.05	801.165	6353.85
ADH5	1329.2	1600.88	1200.22	1132.5	1619.88	1424.9	1496.08	1350.19	1447.56	1156.92	1486.07	885.714	1088.05	1481.25	1518.02	1291.65	1218.7	1532.04	1510.4	939.54	1884.07	1393.79	1237.14	1592.25	1567.57	708.738	2002.74	1309.01	1689.08	1676.42	1470.2	1528.56	1493.37	1508.68	1852.92	1673.59	1409.61	1572.66	1380.33	1223.38	1533.33	1354.96	1096.29	1398.16	1253.06	1812.83	1431.06	608.886	1125.96
ADHFE1	153.326	292.161	341.991	91.7089	269.006	180.041	304.107	344.501	250.213	239.281	294.757	102.597	204.551	94.7917	178.79	215.933	267.626	306.241	240	745.853	193.218	167.586	70.6105	71.3558	163.063	148.867	621.595	380.301	129.63	177.358	321.229	290.426	831.123	704.906	556.948	286.827	275.466	177.515	707.483	197.403	186.667	230.649	135.731	224.383	417.686	440.755	343.13	1054.62	262.5
ADI1	1834.27	1786.99	879.87	1295.65	881.579	2200.62	930.659	837.547	920.619	1005.45	788.65	1716.88	484.392	1687.5	1153.64	2165.91	1545.32	1376.01	1287.2	1317.82	1281.55	1193.79	738.992	1198.78	1013.51	1556.63	1240.84	1040.78	738.791	1091.51	1162.94	1032.18	899.204	926.793	1252.06	1130.43	1093.26	1250.64	1181.2	974.892	1180	981.235	1541.76	1313.39	915.334	1485.28	622.345	1154.41	996.154
ADIPOQ	2.2548	0	8.658	0	2.924	0	1.5282	5.0569	0	2.9468	0	0	0	0	0	0	0.7194	0	0	0	14.9842	0	0	16.3099	0	1.0787	3.9193	0	0	0	0	0	0	0	2.1421	2.5957	0	0	0.6184	0	6.6667	0	10.4408	0.9973	0	0	5.3824	0.7283	0
ADIPOR1	2067.64	1660.92	1364.72	1458.81	1309.94	2125.51	1215.66	1396.97	1604.62	4568.15	1715.91	4683.12	1735.02	1360.42	2845.68	2043.46	5496.4	1789.31	1940.8	3385.77	2027.6	2104.83	1990.64	1759.43	2136.94	4640.78	1530.08	1181.32	1269.01	1358.49	2600.56	1269.51	1040.67	1161.51	1019.64	1684.62	1724.53	1979.43	1869.51	1148.92	2494.29	1397.19	1984.92	2130.14	2021.64	1686.04	4298.55	2419.52	1653.85
ADIPOR2	1926.72	1278.71	1383.12	3780.33	1409.36	4124.49	1842.22	1845.13	1412.88	1373.21	1577.3	1448.05	1542.46	1766.67	1778.38	1306.13	1012.23	1378.5	1602.4	575.174	1495.27	1308.97	1989.67	2053.01	1950.45	1279.4	1530.08	1639.71	1501.95	2540.57	1337.99	1760.26	1551.72	1532.08	2142.11	1787.15	2031.56	2060.61	1703.77	1712.55	1397.14	1653.64	2118.33	1165.79	1444.03	1488.3	1859.63	1605.97	1251.92
ADK	333.709	516.285	471.861	345.508	627.193	242.798	568.481	331.226	499.745	376.013	658.817	345.454	302.495	760.417	450.034	504.283	348.921	273.874	501.6	450.508	570.189	666.897	387.874	551.478	536.036	382.956	251.617	566.778	535.088	335.849	310.056	492.357	522.546	913.207	751.88	577.547	597.561	428.178	925.788	858.875	398.095	484.754	464.037	402.892	331.138	553.962	414.448	288.42	301.923
ADM	133.033	44.0243	3.2468	156.758	1.462	132.716	7.6409	0.6321	1.3599	39.4873	3.509	5.1948	175.234	2.0833	19.0347	65.8332	17.9856	20.7481	4.8	124.131	5.5205	4.1379	0	16.3099	1.8018	2.1575	5.487	4.593	174.464	3.7736	12.1043	4.827	0.8842	4.5283	0	12.9786	5.0215	66.0107	12.987	0	11.4286	35.1837	9.2807	12.9643	13.1703	105.66	61.2252	153.678	0.9615
ADM2	16.9109	259.143	20.5628	12.7966	0	21.6049	9.1691	20.2276	9.519	12.966	21.9313	44.1558	3.9977	6.25	10.1971	123.766	124.46	267.235	381.6	34.778	30.7571	6.2069	87.0541	10.1937	14.4144	22.6537	4.7031	19.2907	13.6452	31.1321	197.393	7.2405	15.9151	15.8491	5.3553	5.8404	3.5868	5.3522	22.8819	6.0606	213.333	95.387	29.0023	422.837	184.384	35.4717	28.9306	91.7698	8.6538
ADNP	2820.74	3400.88	3961.04	3051.99	5217.84	2059.67	4001.53	3092.92	3866.05	2755.86	3802.89	1593.51	3989.74	2037.5	4685.93	2080.33	2251.08	3103.91	3427.2	1782.77	3518.14	3424.83	4814.09	4155.96	3793.69	3089.54	4123.06	4450.63	3597.47	3885.85	3590.32	4380.53	3987.62	3370.57	4208.17	3800.78	3761.84	3684.11	2742.73	4064.07	3622.86	2761.53	3128.77	3377.71	2247.41	2429.43	3880.07	2554.26	2061.54
ADNP2	1277.34	606.335	1338.74	1362.84	815.789	550.412	1139.26	1157.4	1126.64	745.543	1136.92	779.221	1146.68	532.292	2028.55	1478.61	587.77	632.401	752	1558.59	894.322	1222.07	1315.48	1054.03	1653.15	922.33	890.457	957.184	473.684	996.226	1175.05	1045.05	961.981	905.66	1123.54	898.767	934.72	1365.71	839.208	820.779	1073.33	981.235	875.87	1508.85	743.18	694.34	1067.07	1446.47	675.962
ADO	481.398	479.265	481.602	381.765	444.444	474.28	638.013	589.128	526.942	436.717	583.373	1246.75	409.768	631.25	426.241	549.049	493.525	668.917	516.8	329.053	626.972	507.586	548.441	775.739	556.757	588.997	537.723	660.475	797.271	599.057	598.697	797.265	680.813	655.849	769.017	458.144	530.846	388.928	494.743	657.143	651.429	594.214	679.814	429.818	461.9	430.943	484.42	839.039	665.385
ADORA2A	81.1725	70.0087	323.593	72.514	36.5497	59.6708	104.68	87.2314	52.3542	142.626	226.226	70.1299	81.2873	101.042	116.295	271.233	84.8921	80.5024	84	337.598	106.459	93.7931	199.257	54.0265	81.0811	100.324	66.6275	90.9417	54.5809	94.3679	59.5903	136.677	66.313	69.434	95.2381	62.8683	72.4175	66.0107	104.514	60.2857	106.667	108.679	141.531	83.7696	128.881	199.758	572.557	1008.74	151.923
ADORA2B	155.581	190.105	80.0866	47.9872	40.9357	93.6214	8.405	173.831	82.9509	66.0085	12.2815	80.5195	101.276	79.1667	32.6309	84.2665	102.158	158.515	165.6	14.9813	10.2524	72.4138	72.5451	32.6198	9.009	88.4574	51.7343	123.093	19.4932	92.4528	119.181	57.1199	68.9655	59.6226	144.592	60.3504	43.759	115.073	142.857	28.5714	105.714	94.6052	93.9675	90.7504	279.398	53.5849	27.585	11.6533	218.269
ADORA3	16.9109	16.0088	30.303	6.3983	89.1813	22.6337	55.0143	24.0202	16.9981	18.8596	9.6498	23.3766	27.9841	54.1667	38.0693	14.4833	12.2302	30.7071	12	79.7218	111.987	22.069	10.6399	19.368	23.4234	22.6537	102.685	31.2325	32.1637	11.3208	30.7263	24.9397	20.336	14.3396	47.1264	69.4354	58.8235	16.9487	17.9344	27.7056	25.7143	29.7107	27.8422	11.9671	66.7921	13.5849	71.9901	15.295	159.615
ADPGK	4308.94	3201.63	2792.9	3488.05	3363.25	4173.08	2731.09	2999.15	2815.37	3001.36	2765.75	1832.51	2702.76	2547.94	2548.09	3238.59	3447.9	3518.86	3134.16	5881.9	3270.48	3077.62	2039.09	2200.92	2398.77	2859.74	2586.81	3649.05	2818.27	3810	3709.47	2869.38	2909.06	3123.91	2884.44	3931	3022.68	3025.97	2337.24	2769.33	2922.04	3439.97	3134.08	2997.53	3547.83	1916.08	2166.01	2935.57	2450.07
ADPRH	372.041	515.285	11.9048	307.118	200.292	381.687	335.435	154.235	288.968	256.962	231.595	202.597	320.485	403.125	240.653	106.65	644.604	353.547	387.2	188.336	318.612	322.069	28.0508	171.254	133.333	818.77	188.909	357.336	558.48	390.566	445.996	508.447	508.4	406.038	363.087	302.401	393.113	272.963	452.072	295.238	573.333	29.7107	676.334	324.109	704.61	215.094	161.473	90.3132	622.115
ADPRHL1	18.0383	15.0083	77.9221	89.5761	11.6959	11.3169	29.7994	30.3413	25.8372	2.9468	14.036	16.8831	12.6595	23.9583	11.5568	15.8	33.0935	54.7749	28	75.9765	31.5457	7.5862	10.6399	10.1937	9.9099	17.26	1.5677	21.1279	27.2904	30.1887	54.9348	21.7216	22.1043	50.566	18.2079	13.6275	20.8034	10.7044	7.4212	19.0476	28.5714	14.0735	25.522	22.9369	35.7479	7.5472	16.8201	8.74	0
ADPRHL2	818.489	497.275	283.55	666.489	154.971	422.839	360.649	377.37	369.879	338.294	282.475	153.247	203.885	536.458	331.067	385.783	379.137	714.563	856.8	263.777	318.612	337.241	220.537	323.14	194.595	552.319	161.474	297.627	292.398	315.094	466.48	366.05	307.692	320.755	235.632	367.943	368.723	272.071	341.373	234.632	304.762	315.09	244.78	460.733	334.901	264.906	426.558	506.919	296.154
ADRA1D	4.5096	1.0006	5.4113	19.1949	10.2339	1.0288	0.7641	4.4248	0	4.7149	0	2.5974	6.6629	0	2.7192	1.3167	0	1.6598	4.8	0	0	0	12.5745	2.0387	0	0	2.3516	5.5116	2.924	4.717	4.6555	1.609	0	0.7547	1.0711	5.1914	3.5868	6.2443	2.4737	2.5974	4.7619	3.1274	0	3.989	6.5851	17.3585	0	8.74	13.4615
ADRA2A	24.8027	697.385	2.1645	51.1864	2.924	18.5185	9.9331	3.1606	88.3903	41.8447	28.0721	197.403	39.3111	108.333	31.2712	0	18.705	132.787	1619.2	2.1402	125.394	67.5862	0	10.1937	1.8018	316.073	20.3802	65.2208	0	2.8302	589.385	22.5261	27.4094	24.1509	123.171	3.2446	8.6083	24.085	69.8825	200.866	182.857	4.6912	95.1276	352.032	14.111	152.453	28.2578	41.5149	33.6538
ADRA2C	2.2548	5.0028	0	1.0664	2.924	0	0.7641	0	654.088	107.264	0.8773	0	36.6459	4.1667	37.3895	3.95	5.7554	10.789	89.6	1.6051	676.656	427.586	1.9345	1.0194	0.9009	550.162	11.7578	0.9186	6.8226	8.4906	2.7933	2.4135	0	2.2642	0	25.9572	121.234	46.3859	12.3686	1.7316	0.9524	9.3823	0	7.9781	20.6961	167.547	0	0.7283	0.9615
ADRB1	2.2548	19.0105	45.4545	0	2.924	0	350.716	213.654	3.3996	1.7681	227.208	110.39	92.6142	434.375	2.0394	27.65	13.6691	3.3197	1.6	368.111	10.2524	13.1034	3.8691	0	246.847	62.5674	50.9504	95.5347	91.6179	14.1509	1.8622	22.5261	288.24	170.566	183.15	4.5425	1.4347	11.5965	98.3302	143.723	40	181.392	49.884	3.989	12.2295	3.7736	157.436	3.6417	96.1538
ADRB2	491.545	905.5	1153.68	277.259	918.129	807.613	86.3419	2178.89	101.309	449.094	277.212	996.104	400.44	408.333	205.982	460.832	1270.5	1087.2	1084.8	76.5115	41.7981	196.552	37.7234	77.472	77.4775	152.104	139.526	1130.8	636.452	2605.66	501.862	1089.3	408.488	397.736	1136.39	942.894	1660.69	616.397	732.839	524.675	982.857	1559.81	634.571	606.333	1702.73	59.6226	183.003	32.0466	946.154
ADRBK1	13170.2	10627.9	9317.1	15749.4	5615.5	12041.2	9805.54	8327.43	16817.3	25049.7	9233.96	6496.1	16925.1	6066.67	11836.2	9160.03	16698.6	7992.98	8087.2	37951.8	15990.5	24126.2	6146.99	5029.56	4482.88	20195.3	10199.5	7938.56	4433.72	5024.53	10328.7	7644.41	7656.94	7040	4499.5	11825.4	13647.1	12289.6	12372.9	6859.74	11664.8	6865.52	10367.7	9821.99	12100.7	9542.64	15594.9	22584.9	9141.35
ADRBK2	1358.51	630.348	752.164	1520.66	2907.89	1209.88	1836.1	240.202	2520.48	1637.84	1601.86	662.338	1467.83	735.417	1293	982.232	552.518	1168.53	727.2	1184.59	1989.75	2358.62	1979.03	1385.32	1790.09	2530.74	2261.41	1279.61	1448.34	1397.17	812.849	958.97	959.328	1406.79	833.28	2386.11	2169.3	1800.13	939.394	1342.86	830.476	1372.95	2964.04	1108.95	1063.97	2235.47	3053.19	3096.14	3290.38
ADRM1	1676.44	1624.9	806.277	2210.61	941.52	743.827	612.798	660.556	1986.06	4066.6	963.223	735.065	1607.09	1131.25	1529.57	1495.73	1584.89	594.224	1388	2945.43	2361.2	1809.66	308.558	627.931	651.351	2976.27	377.033	507.069	440.546	568.868	793.296	637.973	681.698	538.113	683.332	931.213	1911.05	532.546	1067.41	843.29	1150.48	682.564	727.378	965.345	939.793	536.604	682.224	1487.98	547.115
ADSL	1784.67	1594.88	1058.44	1465.21	1081.87	967.078	1554.15	1374.84	1548.87	1477.53	1586.95	287.013	1223.97	1697.92	1820.53	1982.9	934.532	1278.08	1542.4	1053.5	1607.26	1648.97	1098.82	1803.26	1684.68	590.076	1090.34	1324.62	1257.31	1480.19	1472.07	1576.83	1028.29	1556.23	1151.38	1888.38	1550.22	1444.21	1598.64	1258.01	1340.95	1839.72	936.195	1476.94	944.497	1523.02	2605.77	1348.14	751.923
ADSS	1618.94	1625.9	1201.3	1052.52	2089.18	1875.51	1062.85	1310.37	1431.24	987.771	1230.79	2497.4	1447.18	1188.54	1612.51	857.149	1710.79	1968.58	1656.8	449.438	1564.67	1760	1740.11	1427.12	1063.96	1391.59	1596.71	1342.08	1580.9	1260.38	1771.88	1164.92	1062.78	1138.11	1252.06	1715.12	1568.87	1831.35	982.684	1309.09	1844.76	1539.48	1312.07	1805.04	1450.61	1185.66	1747.27	801.894	1224.04
ADSSL1	2.2548	22.0122	12.987	5.3319	7.3099	2.0576	3.0564	16.4349	13.5985	4.1255	3.509	3.8961	21.3213	1.0417	22.4337	10.5333	6.4748	2.4898	14.4	32.1027	3.1546	21.3793	0	6.1162	7.2072	24.8112	2.3516	2.7558	13.6452	16.9811	13.9665	20.1126	46.8612	11.3208	13.9237	11.6807	4.3042	5.3522	8.0396	1.7316	3.8095	14.8554	13.9211	7.9781	5.6444	10.566	12.7833	9.4683	25
AEBP1	1572.72	1522.84	712.121	132.231	10.2339	1351.85	430.182	1497.47	1621.62	2825.99	1683.45	366.234	1121.36	612.5	644.46	493.749	394.964	1365.22	1354.4	118.245	1288.64	855.862	59.9706	639.144	142.342	2501.62	581.619	242.511	606.238	4259.43	2340.78	1322.61	671.087	720	2074.63	162.881	1163.56	70.4709	105.751	198.268	845.714	742.768	45.2436	745.949	848.542	286.038	213.952	1447.2	178.846
AEBP2	758.737	653.361	860.39	770.994	1330.41	886.831	845.845	685.209	824.749	504.494	832.513	1706.49	666.955	838.542	617.947	613.566	494.964	913.744	754.4	968.967	711.356	773.103	1084.31	839.959	981.982	1079.83	950.029	733.963	969.786	768.868	727.188	746.581	798.409	890.566	1279.91	700.844	711.621	826.918	635.127	1150.65	698.095	915.559	929.234	657.193	564.44	998.491	759.597	683.176	840.385
AEN	448.704	772.427	543.29	360.437	372.807	179.012	653.295	594.817	548.02	801.532	624.604	684.416	578.339	656.25	872.876	369.983	404.317	316.2	418.4	360.621	604.101	655.862	519.423	797.146	869.369	558.792	257.887	434.499	381.092	654.717	407.821	698.311	568.523	393.962	408.072	467.229	385.222	335.406	733.457	365.368	563.809	748.241	671.694	691.1	397.93	528.302	356.587	560.087	449.038
AES	4538.9	6261.46	4086.58	2601.97	1150.58	2677.98	2577.27	3880.53	4695.56	5669.66	4959.11	17500	4903.22	5554.17	4138	7136.32	6644.6	4959.61	3788.8	17129.5	5656.94	4540.69	2796.37	3806.32	3074.77	6991.37	5401.53	2383.77	4167.64	3438.68	4839.85	3334.67	3807.25	3310.94	2862.93	3066.19	3314.2	2300.56	3116.26	3066.67	5083.81	4009.38	3767.98	5335.33	5329.26	3538.87	4548.16	6362.71	3701.92
AFAP1	22.5479	33.0182	9.7403	31.9915	49.7076	132.716	17.574	6.3211	149.244	14.7341	155.16	3.8961	17.3235	18.75	30.5914	9.2167	128.05	74.693	26.4	12.8411	165.576	96.2828	12.5745	24.4648	50.4505	166.127	16.4609	16.5348	9.7466	12.2642	56.797	27.8681	8.8417	6.0377	17.1369	9.7339	6.4562	53.4776	6.1843	9.5238	109.524	28.147	46.4037	91.7477	110.066	15.8491	126.433	32.0466	0.9615
AFAP1L1	11.274	12.0066	5.4113	25.5932	1.462	41.1523	6.1127	2.5284	27.8769	5.8936	14.9133	5.1948	428.424	6.25	24.4731	3.95	0	24.0677	24.8	0	21.2934	9.6552	4.8363	22.4261	2.7027	69.0399	10.9739	21.1279	13.6452	0.9434	145.251	16.8946	15.9151	0.7547	10.7105	4.5425	5.7389	0.892	3.7106	17.316	30.4762	4.6912	8.1206	84.7669	2.8222	98.8679	3.364	4.37	0
AFAP1L2	13.5287	7.0039	9.7403	9.5974	11.6959	9.2593	48.9016	30.3413	35.3561	22.9851	95.6205	10.3896	38.6448	66.6667	141.4	6.5833	2.1583	27.3874	5.6	5.8855	17.3502	35.8621	61.9051	3.0581	11.7117	21.575	292.377	22.9651	46.7836	17.9245	13.0354	27.3532	38.0195	47.5472	28.9184	12.9786	20.8034	6.2443	16.6976	52.8139	31.4286	17.9828	25.522	7.9781	7.5259	314.717	121.778	18.9366	3.8462
AFARP1	15.7835	25.0138	23.8095	9.5974	1.462	1.0288	13.7536	20.8597	17.6781	0	18.4223	35.0649	49.9717	11.4583	0	10.5333	2.8777	5.8095	20.8	6.4205	14.9842	10.3448	3.8691	17.3293	25.2252	14.0237	6.2708	16.5348	10.7212	27.3585	16.7598	10.4586	5.305	15.0943	17.1369	1.9468	2.1521	5.3522	24.7372	19.0476	7.619	23.4558	2.3202	17.9506	13.1703	15.8491	3.364	24.7633	0.9615
AFF1	5266.07	2832.57	7274.89	5007.73	2323.1	4164.61	7297.04	6688.37	2512.32	3494.92	7316.29	9594.81	7705.63	2885.42	3849.76	4312.08	3189.21	4456.68	5232.8	2952.92	3896.69	3633.1	3984.18	4953.11	8987.39	3818.77	6508.33	10185.5	8107.21	6471.7	4867.78	9023.33	8317.42	8778.87	9781.93	3776.77	3077.47	4341.54	6591.84	7671.86	4021.9	5818.61	5974.48	5130.89	6103.48	4629.43	6316.97	5655.5	4768.27
AFF2	25482.5	2459.36	545.455	11303.7	1233.92	20470.2	342.311	274.968	456.91	1522.91	131.588	200	484.392	157.292	1501.02	696.515	4508.63	17918	6624.8	60.9952	347.792	667.586	331.773	2474.01	112.613	119.741	3.1354	1664.51	286.55	458.491	20819.4	345.133	144.12	116.981	641.561	770.928	2307.03	2083.8	243.043	473.593	17871.4	229.867	429.234	11000.7	2192.85	84.5283	443.378	414.421	50.9615
AFF3	105.975	487.269	272.727	207.945	776.316	8.2305	535.626	510.114	1928.27	961.249	1014.1	937.662	630.976	193.75	1458.87	169.85	20.8633	235.698	1018.4	307.116	373.817	805.517	2725.76	803.262	492.793	2236.25	46.2473	326.104	632.554	133.962	531.657	201.931	71.618	609.057	1876.49	1548.35	2091.1	16.0567	850.34	1395.67	778.095	125.88	938.515	693.094	170.273	1951.7	839.66	873.999	1786.54
AFF4	3356.26	1594.88	3425.32	3986.14	4361.11	2211.93	3068.58	2475.98	2536.8	1793.43	3311.63	3066.23	3371.42	1415.62	2682.53	2995.41	2086.33	2947.05	2952.8	2329.05	2523.66	2878.62	3382.53	3390.42	2817.12	2275.08	4159.91	3666.14	3173.49	3250	3253.26	2810.94	3178.6	2852.83	3752.97	2484.1	2251.79	4086.42	2282	3295.24	3505.71	2115.72	2805.1	3762.65	3532.46	4091.32	2268.03	899.49	2388.46
AFG3L1	561.443	772.427	1027.06	1033.32	684.211	672.84	563.133	1079.65	750.637	709.592	694.784	381.818	454.409	262.5	579.878	552.999	973.381	701.284	652.8	445.693	582.808	662.759	707.073	352.701	493.694	406.688	381.736	722.94	500	947.17	487.896	671.762	615.385	649.057	565.516	717.716	666.428	468.319	670.996	387.879	533.333	1046.91	379.35	500.623	929.445	333.585	510.659	416.606	471.154
AFG3L2	966.189	888.861	904.61	736.188	887.427	782.788	1201.15	970.626	787.578	814.793	1254.6	247.143	1107.18	1650.11	1299.25	1173.91	590.13	933.928	867.976	758.004	1025.67	1098.01	936.538	1341.3	1355.32	727.983	1120.64	1211.97	809.766	1065.92	889.041	1146.85	1010.97	1407.54	1052.66	1077	1037.34	1143.76	1496.3	1154.76	903.524	1101.85	1072.59	1065.75	624.44	847.992	962.111	460.044	591.413
AFMID	321.308	396.219	324.675	357.238	178.363	416.667	487.488	331.858	560.258	367.173	457.049	418.182	370.457	629.167	280.082	439.766	278.417	280.514	381.6	245.586	459.779	417.241	106.399	390.418	445.946	603.02	174.015	426.232	354.776	383.962	200.186	396.621	450.928	483.019	476.619	347.826	304.161	281.884	363.636	355.844	203.81	550.43	261.021	274.246	206.961	352.453	226.735	678.077	138.462
AFTPH	1277.34	960.531	1623.38	1713.68	1650.58	2219.14	2193.7	1358.41	1801.12	955.945	2501.92	1337.66	1717.03	3516.67	1334.47	1647.15	1120.86	1475.6	1182.4	2451.58	1955.05	1694.48	1640.49	2180.43	1994.59	872.708	2085.05	1954.79	2930.8	1814.15	1204.84	1849.56	2253.76	1824.15	2392.73	1521.74	1708.75	2156.05	1418.06	2848.48	1486.67	1678.66	2689.1	1071.05	1578.55	1971.32	1865.69	1054.62	3161.54
AG2	51.8602	41.0227	5.4113	27.7259	1.462	28.8066	12.2254	5.689	4.7595	32.4149	5.2635	25.974	14.6584	4.1667	25.8328	17.1166	38.1295	36.5166	48.8	15.5163	6.3091	9.6552	0	6.1162	9.9099	10.7875	1.5677	10.1046	0	9.434	81.0056	1.609	3.5367	1.5094	3.2132	3.8936	2.8694	9.8124	7.4212	8.658	68.5714	25.0195	3.4803	101.72	85.6068	25.6604	9.4193	10.1966	4.8077
AGA	553.551	410.227	361.472	251.666	372.807	531.893	333.142	304.046	206.017	208.045	297.389	271.429	183.23	290.625	310.673	400.266	574.82	622.442	478.4	368.646	341.483	409.655	255.359	241.59	167.568	202.805	378.601	413.371	350.877	325.472	672.253	353.982	301.503	374.34	507.68	341.337	352.941	225.685	336.425	350.649	354.286	594.214	303.944	281.227	224.835	233.962	419.83	99.7815	248.077
AGAP1	5.637	28.0155	18.3983	21.3276	2.924	3.0864	12.2254	8.8496	2.0398	4.1255	124.57	1.2987	3.3314	3.125	4.0789	9.2167	23.0216	22.4079	34.4	12.306	17.3502	23.4483	4.8363	37.7166	15.3153	6.4725	11.7578	16.5348	23.3918	10.3774	20.4842	14.4811	5.305	2.2642	2.1421	7.1382	2.1521	8.0283	6.1843	0.8658	69.5238	10.9461	4.6404	13.9616	31.0442	273.207	65.9349	204.661	5.7692
AGAP11	6.7644	15.0083	5.4113	10.6638	0	4.1152	18.3381	10.847	4.1203	1.7681	7.8953	7.9481	3.3314	0	5.119	3.95	3.6403	7.4693	3.2	10.7972	16.5615	3.5034	8.7054	1.0194	8.1081	4.315	1.5677	42.8896	2.924	6.6038	4.6555	11.2631	41.5561	13.5849	9.6395	1.9468	2.1521	2.6761	1.2369	0	20.9524	4.6912	8.1206	1.9945	8.4666	3.0189	6.728	2.185	7.6923
AGAP2	1138.09	1545.54	817.229	652.615	774.313	488.251	1933.6	1228.67	1068	2063.32	1848.44	763.753	1371.62	1113.24	1431.99	825.061	1764.98	960.328	2213.33	798.694	1307.97	1221.43	1204.81	776.769	821.171	2516.19	1233.16	1059.78	464.386	487.151	1405.88	1575.9	2177.86	1314.93	1131.64	993.744	1279.53	909.753	1250.9	1239.12	2017.65	646.552	927.877	2165.84	1246.77	2411.92	1791.67	5443.58	796.798
AGAP3	514.092	601.332	327.922	446.814	4.386	465.021	201.719	513.274	415.434	86.6362	170.187	128.571	1035.41	303.125	881.713	35.5499	666.907	399.192	298.4	1187.8	597.003	520	26.1162	83.5882	262.162	526.429	835.587	533.708	145.224	525.472	513.966	342.719	487.18	385.66	337.382	362.103	187.948	437.99	612.863	64.0693	516.191	199.375	416.473	480.678	620.884	558.491	833.605	1664.24	339.423
AGAP4	3254.79	2050.13	954.545	2509.2	697.368	2049.38	750.334	1054.99	776.475	687.196	743.033	477.922	584.336	244.792	520.054	626.732	2382.01	2314.65	2717.6	513.644	551.262	708.966	658.709	372.069	536.036	325.782	413.09	1021.49	1704.68	1146.23	1345.44	712.792	1022.99	818.868	728.317	683.971	779.77	762.692	919.604	517.749	2695.24	1224.39	368.909	1372.23	1994.36	401.509	320.928	946.103	497.115
AGAP5	168.095	279.384	282.922	405.705	172.266	131.687	223.45	309.829	230.406	163.059	244.087	118.013	205.11	98.9583	198.844	124.069	174.712	171.819	259.624	41.0915	182.547	216.903	183.945	78.4913	153.288	63.6354	147.584	277.216	175.137	240.811	206.452	208.841	223.201	205.977	273.215	212.927	188.723	173.189	238.782	138.623	206.333	363.44	121.357	135.976	285.654	198.596	187.484	201.551	195.192
AGAP6	618.94	861.476	667.749	1082.38	649.123	865.226	412.607	1054.99	732.279	607.632	666.712	232.468	594.33	194.792	537.05	396.316	579.856	832.412	987.2	415.73	586.751	602.069	479.765	366.973	396.396	238.404	436.606	818.475	430.799	719.811	567.97	619.469	599.47	552.453	604.074	611.291	436.155	396.956	687.693	343.723	466.667	548.084	415.313	606.333	614.299	339.623	273.159	965.04	423.077
AGAP7	74.4081	82.0453	164.502	72.514	23.3918	67.9012	28.2713	175.095	43.5152	25.9319	49.1261	189.61	46.6402	34.375	25.153	150.1	48.2014	61.4142	154.4	37.4532	35.489	41.3793	12.5745	34.6585	18.9189	15.1025	137.958	47.7673	1250.49	104.717	52.1415	57.1199	76.9231	35.4717	57.8369	65.5419	38.7374	47.2779	288.806	45.8874	60.9524	776.388	44.0835	49.8629	111.947	97.3585	6.728	42.9716	91.3462
AGAP8	45.0958	193.957	307.446	97.9685	72.807	93.6214	117.669	271.719	147.544	213.756	83.9531	57.1429	142.606	29.1667	250.85	89.5332	136.691	155.195	122.4	153.253	167.981	70.9862	113.17	45.8716	44.1441	69.6872	98.6243	166.616	107.213	237.736	93.9292	234.916	101.247	123.019	210.998	174.562	101.148	58.8744	218.169	164.216	125.714	576.231	15.0812	125.654	56.9426	53.683	33.6402	136.956	56.7308
AGBL2	37.2041	40.0221	16.2338	164.223	42.3977	23.6626	9.9331	27.8129	66.6327	40.0766	66.6712	10.3896	31.3156	34.375	40.1088	6.5833	35.2518	81.3324	56.8	8.5607	41.0095	54.4828	11.6072	4.0775	41.4414	22.6537	39.1926	75.3254	5.848	25.4717	14.8976	34.5937	130.858	99.6226	88.8975	42.1804	27.977	31.2213	87.8169	39.8268	40	19.5465	3.4803	18.9479	52.6811	29.434	93.5199	15.295	0
AGBL3	10.1466	4.0022	8.658	23.4604	11.6959	0	3.0564	15.1707	18.358	8.2511	14.9133	7.7922	10.6606	0	12.9164	1.3167	7.1942	9.1291	0.8	2.6752	8.6751	8.9655	23.2144	5.0968	6.3063	16.1812	5.487	23.8837	7.7973	0.9434	6.5177	8.0451	21.2202	3.7736	17.1369	12.3297	5.7389	5.3522	4.329	10.3896	6.6667	2.3456	3.4803	4.9863	4.7037	35.4717	22.2026	8.74	0
AGBL5	695.659	832.51	602.868	492.69	380.132	342.634	981.899	941.422	435.859	908.248	578.127	769.052	744.272	469.896	785.248	808.485	630.352	597.76	856.064	544.757	434.55	473.124	656.775	704.394	801.856	677.476	448.403	695.456	653.996	676.424	911.62	789.244	686.154	567.57	711.244	462.057	601.169	548.656	572.696	742.035	774.371	778.796	526.705	751.932	439.351	539.668	489.815	924.29	261.548
AGER	167.982	443.245	247.835	343.375	216.374	262.346	145.941	353.35	452.15	365.994	301.775	451.948	208.548	142.708	135.282	71.0999	758.273	600.864	238.4	736.758	324.132	237.931	204.094	65.2396	151.351	174.757	326.083	177.29	184.21	271.698	191.806	189.059	160.035	165.283	157.445	333.55	238.164	154.322	215.213	113.42	202.857	229.085	119.49	188.482	402.634	281.509	206.551	383.831	76.9231
AGFG1	2818.49	1555.86	2455.63	3805.92	2871.34	1705.76	1662.66	1585.97	1979.26	1396.79	1817.67	2670.13	2025.52	1069.79	1851.8	1357.48	1839.57	2047.42	1820	4089.35	2045.74	2000.69	2158.94	2408.77	2198.2	1474.65	2257.5	2235.88	2280.7	2208.49	2206.7	1646.82	1615.38	1649.06	1732.96	1581.44	1725.25	2707.33	1680.89	2067.53	2211.43	2082.88	3932.71	2575.92	2924.74	2454.34	2053.4	1520.76	3866.35
AGFG2	322.435	426.236	396.104	274.06	169.591	338.477	381.28	349.558	127.826	627.67	507.929	733.766	186.561	300	446.635	213.3	401.439	318.69	328.8	157.838	223.186	180	155.73	249.745	1033.33	316.073	170.096	280.174	205.653	313.207	409.683	420.756	458.886	278.491	282.758	255.029	243.902	72.255	290.043	276.19	500.952	213.448	626.45	302.169	350.894	102.641	388.881	231.61	258.654
AGGF1	594.138	823.455	993.506	859.504	1374.27	1076.13	1312.7	1049.94	1160.63	753.794	1033.4	523.377	942.799	940.625	1125.09	584.599	711.511	1100.48	1026.4	268.058	1087.54	1096.55	1385.13	1395.51	1081.08	580.367	1338.82	1408.22	1519.49	958.491	928.305	1363.64	1282.05	1221.89	1321.68	1102.53	1107.6	1122.18	1006.8	1479.65	1027.62	1090.7	1168.21	771.877	712.135	1173.58	778.435	239.621	982.692
AGK	541.15	783.433	717.533	576.913	942.982	538.066	794.651	891.277	749.957	710.771	782.509	531.169	715.595	522.917	757.988	466.099	582.734	661.448	356	362.761	698.738	714.483	487.503	811.417	929.73	445.523	869.293	846.952	718.324	790.566	569.832	868.866	908.046	756.226	909.325	831.278	719.512	361.275	817.563	667.533	575.238	786.552	506.961	619.297	458.137	445.283	744.795	437.728	338.462
AGL	841.037	393.217	846.32	1304.19	1773.39	832.304	921.49	836.283	989.291	524.532	1034.28	585.714	768.898	506.25	821.21	331.799	382.014	766.018	588	149.813	740.536	762.759	747.698	1345.57	918.018	378.641	1198.51	1169.38	955.166	627.359	582.868	1197.1	1205.13	987.17	1199.58	913.043	812.052	947.343	765.615	956.71	619.048	637.998	810.905	661.182	494.826	1180.38	1155.88	262.928	416.346
AGMAT	20.2931	38.021	25.974	38.3898	19.0058	16.4609	16.0458	13.2743	97.9092	28.8787	121.061	44.1558	39.9773	187.5	57.7838	9.2167	10.7914	29.8772	38.4	22.4719	80.4416	133.103	18.3781	58.104	151.351	162.891	48.5989	59.7092	21.4425	13.2075	11.1732	57.9244	68.0813	100.377	118.887	35.0422	15.7819	50.8461	84.7248	46.7532	33.3333	21.8921	92.8074	15.9561	21.6369	18.8679	71.9901	59.7232	24.0385
AGPAT1	1425.64	1782.42	1376.13	1211.25	869.605	1132.87	1931.2	1551.22	1647.5	2552.15	1629.27	5293.7	1349.99	1210.62	2099.28	1674.85	2264.04	1251.84	2061.29	1116.07	1984.36	1820.55	1329.73	1107.3	2163.38	3341.57	996.143	1114.75	1220.87	1347.16	2580.65	1945.44	1720.57	1379.22	1228	1602.22	1667.32	1348.8	1657.45	1251.9	1913.88	1269.04	1404.84	2155.79	1632.88	1752.55	1340.8	2065.96	1254.01
AGPAT2	878.241	708.391	666.667	1067.45	192.982	799.383	551.671	707.965	1083.8	1185.21	410.554	1746.75	1587.1	678.125	652.617	1506.26	1226.62	562.687	609.6	1555.91	1201.89	921.379	328.871	490.316	317.117	1777.78	531.452	462.057	453.216	533.019	967.412	724.859	659.593	511.698	332.027	556.132	877.331	682.408	777.984	470.13	580.952	630.962	660.093	671.154	1040.45	668.679	379.462	2292.79	680.769
AGPAT3	517.475	1224.68	978.355	437.217	118.421	479.424	1305.06	1280.66	2090.77	1207.6	1508	1510.39	1233.3	679.167	583.957	1187.63	222.302	385.084	1133.6	685.928	1772.87	1717.93	1613.4	1412.84	2182.88	3305.29	169.312	1128.96	962.963	1111.32	856.611	1487.53	1035.37	1220.38	1083.91	528.877	882.353	870.628	910.946	1851.08	920	1180.61	2314.39	545.5	1351.83	1235.47	1683.36	3275.31	2625
AGPAT4	1660.65	429.237	179.654	1177.29	695.906	337.449	1337.15	388.748	933.537	168.558	868.48	106.493	690.942	465.625	323.589	346.283	754.676	543.599	673.6	468.165	873.028	920.69	441.074	938.838	699.099	699.029	36.0572	811.126	1078.95	502.83	983.24	670.153	2168.88	2118.49	1821.86	375.081	248.207	547.711	406.926	698.701	560.952	341.673	280.743	756.918	1549.39	975.094	411.084	432.629	639.423
AGPAT5	1086.81	1304.72	2109.31	942.682	3837.72	1519.55	1998.85	1764.85	2649.67	2037.42	1961.54	2048.05	1502.48	1302.08	3521.41	712.315	667.626	1395.1	2389.6	121.455	2522.87	2129.66	4050.92	2609.58	1731.53	1034.52	4924.16	2096.25	1931.77	1623.58	1431.1	1923.57	1919.54	1577.36	3003.23	2599.61	2326.4	2189.06	1680.27	2491.77	1626.67	1536.36	1127.61	1534.78	524.929	1532.83	1962.57	1751.64	707.692
AGPAT6	1356.26	1569.87	1168.83	1431.09	428.363	1103.91	1191.98	1314.79	1464.56	1242.96	1402.73	496.104	1488.49	820.833	966.01	1410.15	1745.32	1889.73	2292.8	1560.19	1671.14	1577.93	706.105	761.468	1105.41	1173.68	1758.18	917.684	1302.14	1561.32	1595.9	983.105	1041.56	1153.96	1269.2	1397.79	1213.06	1331.81	1586.89	970.563	1686.67	1392.49	1126.45	1686.36	1940.73	1219.62	1091.29	2538.24	1338.46
AGPAT9	4.5096	167.092	2.1645	2.1328	2.924	8.2305	142.884	4.4248	6.1193	44.2022	125.447	37.6623	115.934	511.458	21.7539	21.0666	60.4317	73.8631	50.4	195.292	13.4069	17.2414	8.7054	12.2324	99.0991	12.945	15.6771	116.662	11.6959	4.717	113.594	222.043	592.396	915.472	61.0501	132.382	27.977	8.9204	123.686	237.229	145.714	22.674	286.543	61.83	364.064	767.547	1066.4	587.036	311.538
AGPHD1	4.5096	4.0022	2.1645	4.2655	0	0	0.7641	1.8963	1.3599	2.3574	5.2635	0	11.3269	3.125	2.7192	1.3167	2.1583	2.4898	0.8	0.535	4.7319	3.4483	4.8363	8.1549	9.009	1.0787	1.5677	1.8372	8.7719	2.8302	0.9311	10.4586	1.7683	2.2642	2.1421	1.9468	4.3042	7.1363	3.0921	0.8658	6.6667	3.9093	4.6404	2.9918	4.7037	14.3396	5.3824	2.185	2.8846
AGPS	1388.95	1168.65	1549.78	1636.9	4456.14	1484.57	1752.05	1281.92	2034.34	1334.9	1476.42	1998.7	2186.76	1204.17	1802.86	865.048	1089.93	1423.32	2444.8	461.744	2090.69	2328.28	159.599	2057.08	1860.36	1713.05	2212.82	1658.08	1700.78	1389.62	1812.85	1477.07	1852.34	1763.02	2075.7	1730.05	2091.1	2558.36	1858.38	2830.3	1562.86	1359.66	1650.81	1983.55	1529.63	4271.7	1378.58	999.272	1603.85
AGR2	1.1274	0	0	1.0664	1660.82	0	0	0.6321	0	7.6617	0.8773	0	2.6652	0	422.842	0	0	0	0	0	0	4.8276	41.5925	0	0.9009	3.2362	0.7839	0	0	0.9434	0	0	0	0.7547	1.0711	64.244	43.0416	0	50.0928	0	1.9048	0	0	0	0	19.6226	2.6912	0	0
AGRN	2400.23	8794.86	287.879	1679.55	64.3275	985.597	119.198	895.702	391.637	913.511	703.557	227.273	1083.39	137.5	610.469	1167.88	5358.27	3280.68	8709.6	775.281	810.726	4004.83	623.888	82.5688	4027.93	2098.17	993.925	541.976	307.992	1165.09	6142.46	1687.05	206.012	132.076	204.571	452.953	543.042	1007.11	422.387	219.913	4578.1	542.611	858.469	8815.76	4228.6	353.962	267.776	406.409	243.269
AGRP	0	1.0006	6.4935	0	2.924	1.0288	5.3486	12.0101	10.1989	0.5894	7.018	1.2987	1.9989	1.0417	0.6798	3.95	4.3165	1.6598	0.8	10.1659	3.9432	6.2069	1.9345	2.0387	0	8.63	3.1354	5.5116	7.7973	2.8302	2.7933	6.436	7.9576	3.0189	1.0711	7.1382	7.891	1.7841	4.9474	6.0606	0.9524	3.1274	5.8005	0	4.7037	3.7736	4.7096	2.185	0
AGT	3.3822	4.0022	1.0823	12.7966	1.462	4.1152	1.5282	0	8.1591	1.1787	0	1.2987	0.6663	0	2.7192	1.3167	0	2.4898	0	0	0	1.3793	10.6399	2.0387	0.9009	1.0787	0	0.9186	0	2.8302	185.289	0.8045	0.8842	4.5283	4.2842	22.7125	65.9971	1.7841	12.987	1.7316	23.8095	0.7819	0	28.9205	0	0	0	18.9366	0
AGTPBP1	4427.28	2251.24	2003.25	2078.38	4327.49	4757.2	736.581	865.992	1308.18	1917.19	999.191	1515.58	3165.54	450	2327.67	1391.71	3110.79	4266.63	2540	1627.61	2872.24	2935.86	1374.49	872.579	552.252	1173.68	3230.26	1054.56	777.778	892.453	3752.33	921.159	625.995	405.283	736.885	2800.78	3774.75	5367.39	1217.69	517.749	3698.1	1306.49	2387.47	4112.69	4008.47	702.641	1447.2	566.642	2887.5
AGTR1	2.2548	1.0006	1.0823	8.5311	17.5439	2.0576	10.6972	1.8963	1.3599	5.3043	0.8773	0	0	0	16.9952	0	2.1583	9.1291	0.8	0	0	1.3793	0.9673	86.6463	145.946	0	3.9193	0.9186	6.8226	0	6.5177	2.4135	0	0.7547	9.6395	3.8936	6.4562	0	1.8553	8.658	14.2857	0	53.3643	3.989	0.9407	0.7547	10.0921	1.4567	0
AGTRAP	793.687	437.242	365.801	1097.31	307.017	1117.28	511.939	296.46	729.56	697.215	478.98	1063.64	169.904	637.5	219.578	642.532	1559.71	344.418	280.8	1667.74	985.016	609.655	196.355	658.512	350.45	495.146	21.164	587.906	84.7953	72.6415	502.793	338.697	214.854	375.849	246.342	574.302	713.773	1098.1	705.009	235.498	580	125.88	1519.72	497.632	952.963	217.358	713.846	1933.72	1546.15
AGXT	0	140.077	0	1.0664	0	7.2016	0	0	38.0758	0	72.812	0	5.9966	184.375	0	0	2.8777	8.2992	272.8	3.2103	24.4479	46.2069	0	0	11.7117	307.443	0	2.7558	0	0.9434	0	13.6766	161.804	66.4151	137.095	0	0	0	58.1323	91.7749	30.4762	0	10.4408	9.9726	0.9407	0	0	0	9.6154
AGXT2L2	3492.77	1512.69	2329.42	2143.19	1591.13	1500.43	1376.79	1825.03	1831.3	2093.89	1813.63	884.481	1288.79	878.031	1277.4	1695.48	1636.73	1547.49	1129.63	1762.45	1680.39	1556.55	1361.32	977.39	1028.53	1402.42	1426.42	1742.31	1348.53	1746.84	1270.42	1340.76	1943.69	1831.12	1608.67	1531.3	1645.73	1458.96	1844.58	1552.18	1317.94	1584.79	1248.81	1245.1	1781.64	1501.44	1396.97	2189.51	1515.87
AHCTF1	1155.58	975.539	1743.51	1553.72	2609.65	1124.49	1533.52	1435.52	1714.09	924.12	1732.57	814.286	1253.96	848.958	1427.6	1162.61	831.655	1350.28	1508.8	2380.95	1508.68	1804.83	1590.19	1609.58	2690.09	800.432	1334.12	1811.48	1208.58	1598.11	1351.02	1518.91	1420.87	1649.06	1912.9	1505.52	1113.34	1454.02	1348.18	1401.73	1735.24	1705.24	1790.02	1430.07	1322.67	3144.91	2062.15	632.921	894.231
AHCY	2588.5	2468.36	1884.2	1841.64	1213.45	1563.79	3681.38	2630.85	1994.22	2237.81	3201.97	1168.83	2114.8	3692.71	2850.44	3119.18	1373.38	1740.35	2508.8	2675.23	2694.01	2900.69	940.184	3040.77	3777.48	3964.4	1283.95	2461.86	2236.84	2520.75	2152.7	2593.72	2294.43	3104.15	2466.64	2307.59	2178.62	2145.35	3189.24	1998.27	1908.57	2737.29	2411.83	2119.17	917.215	2259.62	921.743	3178.44	1087.5
AHCYL1	1246.9	1741.96	1910.17	1286.06	2188.6	2147.12	2523.78	2271.81	2126.81	1976.13	2299.28	1020.78	2418.63	2920.83	2300.48	1905.21	1037.41	1578.51	1949.6	898.341	2660.88	2464.14	2758.65	2779.82	2158.56	1454.15	2744.27	2210.16	1987.33	2388.68	1615.46	2535.8	2198.94	2190.19	2738.68	1981.18	2043.76	2489.67	2883.74	2639.83	1717.14	1719.31	2383.99	1419.1	1347.13	2504.15	2491.4	1912.6	1735.58
AHCYL2	476.888	819.453	954.545	451.08	1004.39	378.601	660.172	1037.29	790.753	973.626	631.622	438.961	1124.7	364.583	734.194	404.216	523.741	548.578	426.4	178.705	727.129	829.655	976.94	678.899	373.874	993.528	989.222	922.277	1138.4	741.509	663.873	917.136	1038.02	548.679	712.251	831.927	876.614	443.342	722.944	926.407	727.619	549.648	524.362	726.004	691.439	483.019	771.707	265.841	628.846
AHDC1	1959.41	3768.08	1831.17	1656.09	725.146	888.889	2050.81	2305.94	2090.77	2553.12	2292.26	2462.34	1487.16	1052.08	1997.96	1356.16	2708.63	1675.61	2745.6	2996.79	2120.66	1831.72	1595.99	1288.48	887.387	2761.6	2943.37	1956.62	1469.79	1785.85	3069.83	2233.31	2249.34	1681.51	2008.23	1338.09	2144.91	2063.28	1380.33	1554.98	3358.1	982.799	387.471	2740.46	2656.63	2793.96	1665.19	3995.63	876.923
AHI1	489.29	646.357	948.052	600.373	1514.62	417.695	415.664	844.501	734.999	355.975	793.914	381.818	824.2	423.958	613.868	539.832	330.216	341.928	501.6	299.09	432.177	650.345	421.729	820.591	988.288	391.586	554.968	833.173	330.409	412.264	432.961	625.101	679.929	726.793	1097.83	707.982	479.197	621.75	534.323	1059.74	280.952	834.245	259.861	771.877	694.261	490.566	505.276	445.739	140.385
AHNAK	30155.6	18557.3	45801.9	11337.8	7377.19	21808.6	6525.31	37918.5	23328.2	24937.1	39635.2	11602.6	69777.1	8321.88	3281.44	16353	42896.4	32936.3	20884	15514.2	22641.2	55010.3	6913.06	17157	12008.1	23595.5	16148.9	26647.7	58283.6	53437.7	33595.9	15794	40700.3	35695.1	41595.4	20079.8	25223.8	43724.1	68669.1	36304.8	48226.7	29372.2	58366.6	26268.8	116188	65492.1	33877.3	18616.9	99903.9
AHNAK2	5.637	32.0177	796.537	13.863	615.497	2.0576	162.751	79.646	113.547	604.685	256.158	155.844	87.2839	67.7083	624.065	80.3165	10.7914	12.4488	59.2	81.862	47.3186	111.724	802.832	48.9297	206.306	304.207	529.101	115.744	69.2008	47.1698	9.311	67.5784	137.931	178.868	91.0396	872.81	1278.34	25.8691	457.019	249.351	55.2381	60.2033	180.975	52.8546	42.333	440.755	193.095	694.829	321.154
AHR	111.612	211.117	6861.47	74.6468	5865.5	91.5638	997.135	68.9001	1973.82	1124.5	379.85	3158.44	7510.41	1500	1482.66	130.35	249.64	130.298	237.6	3127.88	917.981	4188.97	1898.75	380.224	833.333	6694.71	554.968	2189.03	2162.77	216.038	621.974	2918.74	4266.14	4723.02	1868.99	1734.59	1793.4	1028.52	3544.84	1895.24	701.905	102.424	1957.08	804.787	4928.5	1215.09	1489.59	586.307	7942.31
AHRR	29.3123	45.0249	66.0173	83.1778	32.1637	3.0864	10.6972	19.5954	14.9584	12.966	14.9133	14.2857	16.6572	7.2917	34.6703	6.5833	7.9137	104.57	22.4	4.2804	8.6751	38.6207	83.185	3.0581	2.7027	17.26	3.9193	17.4534	14.6199	22.6415	33.5196	32.1802	56.5871	8.3019	34.2737	11.6807	15.0646	40.1417	34.0136	44.1558	23.8095	12.5098	2.3202	61.83	194.732	18.1132	31.6218	85.2149	14.4231
AHSA1	1038.33	1479.82	1060.61	679.285	994.152	741.769	1156.83	1213.02	1255.82	1316.05	1039.54	609.091	916.814	1783.33	1547.25	1278.48	1030.94	973.499	1235.2	718.566	1305.99	1048.97	767.043	1136.6	1215.32	636.462	1126.4	924.114	1592.59	1351.89	984.171	1268.7	1033.6	1425.66	894.33	1691.76	1497.13	1206.93	1818.18	1020.78	1092.38	1380.77	979.118	1082.02	1056.44	1400	1043.52	1627.82	948.077
AHSA2	1577.23	1782.99	1782.47	2412.16	1570.18	1679.01	1414.33	2737.04	2647.63	1877.71	2552.81	1219.48	2044.84	875	1517.34	887.432	2158.99	2304.69	1522.4	832.531	1436.91	2064.83	1178.13	606.524	1521.62	907.228	1882.81	2809.09	2635.48	2499.06	1163.87	1481.9	2463.31	2092.83	1909.69	2125.89	1569.58	1103.45	1964.75	1440.69	1319.05	2455.82	852.668	1810.02	2288.81	1198.49	1552.16	2206.12	796.154
AHSP	100.338	143.079	225.108	463.876	45.3216	468.107	466.094	258.534	49.6345	5728.6	372.832	610.39	0.6663	184.375	1268.52	100.067	1638.13	967.689	451.2	5.8855	33.9117	37.2414	161.534	1983.69	1996.4	57.1737	123.065	13.779	0	16.0377	179.702	52.2928	0.8842	50.566	41.7711	347.177	248.924	11.5965	9.8949	96.9697	750.476	81.3135	1309.74	250.312	161.806	0	1307.26	187.181	0
AIDA	331.86	338.077	368.896	350.925	425.439	559.671	486.525	318.666	434.975	273.712	522.597	476.351	506.48	711.115	403.046	299.33	392.425	555.566	386.336	214.163	472.382	431.724	388.677	463.18	936.063	422.654	487.682	345.082	565.663	408.491	396.899	527.289	533.616	460.257	475.773	337.91	333.752	327.377	313.37	488.26	508.571	394.457	529.002	334.261	469.671	537.494	743.362	348.98	451.606
AIF1	2272.83	2014.11	2175.32	1899.23	1469.3	5379.63	1628.27	1163.72	730.24	2143.51	1746.61	10224.7	222.541	6633.33	1179.47	4564.88	1753.96	1559.42	1175.2	6489.57	746.057	553.793	1074.63	2076.45	1490.99	2011.87	1950.23	1635.11	1996.1	1094.34	988.827	1282.38	1630.42	2334.34	1781.16	2674.89	1763.99	1411.2	2061.22	3002.6	519.048	2296.33	2916.47	1602.59	731.891	2037.74	2260.62	3455.94	5556.73
AIF1L	2072.15	1626.9	11.9048	659.024	7.3099	213.992	1242.41	58.7863	605.133	167.968	399.15	10.3896	103.275	751.042	104.691	35.5499	380.575	752.739	2748	21.4018	762.618	651.034	143.156	535.168	67.5676	2055.02	81.5207	491.452	80.8967	17.9245	985.102	1380.53	1883.29	2747.92	828.996	41.5315	28.6944	573.58	1803.34	135.931	721.905	10.9461	15.0812	2406.38	263.406	1186.42	475.673	158.048	53.8462
AIFM1	533.258	522.289	514.069	461.743	530.702	425.926	686.915	564.475	439.232	615.883	673.73	137.662	508.379	800	686.608	468.733	382.734	421.6	455.2	560.728	571.767	560	414.958	715.596	927.928	291.262	463.257	576.882	517.544	562.264	411.546	672.566	555.261	759.245	653.343	676.184	572.453	523.626	721.088	633.766	367.619	547.303	595.128	390.925	349.012	565.283	533.534	403.496	386.538
AIFM2	37.2041	17.0094	34.632	90.6425	67.2515	12.3457	28.2713	27.8129	20.3978	71.3128	107.025	10.3896	19.9887	126.042	44.8674	23.7	16.5468	48.9654	44.8	170.679	33.9117	26.8966	12.5745	83.5882	113.513	9.7087	56.4374	110.232	83.8207	30.1887	22.3464	92.5181	307.692	147.924	76.0448	53.2122	27.977	43.7098	118.738	107.359	34.2857	46.9116	233.179	16.9534	22.5776	5.283	129.179	74.2899	87.5
AIFM3	98.0834	3.0017	341.548	260.112	4.386	67.9012	33.6199	239.545	161.679	10.6085	1.7545	10.3896	18.6561	203.125	19.0347	470.997	91.5827	24.8977	12.8	730.107	31.388	185.993	0	17.3293	86.2342	25.89	57.9189	116.396	17.5439	288.585	23.2775	84.473	121.857	158.385	20.35	98.6372	156.341	285.282	95.4607	29.2121	36.1905	516.544	96.1833	50.8601	53.5466	15.8491	84.7734	168.915	142.019
AIG1	1712.51	717.396	135.281	2770.46	185.673	2601.85	370.583	234.513	99.949	40.0766	344.76	161.039	116.601	391.667	349.422	171.166	824.46	1397.59	1034.4	268.058	85.1735	71.7241	97.694	913.354	967.568	44.2287	25.8671	621.894	149.123	747.17	1482.31	666.935	261.715	241.509	865.411	267.359	137.016	194.464	235.003	293.507	589.524	191.556	344.548	819.746	437.441	375.094	150.708	196.65	37.5
AIM1	2270.57	2031.12	2527.06	1872.57	3989.77	1855.97	1663.42	634.008	1503.99	1983.2	1437.82	500	2725.79	798.958	2553.37	1213.96	2470.5	2181.86	1644.8	2298.56	1615.14	1593.79	1287.43	443.425	1164.86	1078.75	930.433	1037.1	1335.28	1300	2176.91	445.696	194.518	1795.47	1400.94	2550.94	3534.43	3301.43	1674.09	1396.54	2734.29	1989.05	4971	2627.77	3555.97	1757.74	2516.29	1240.35	4242.31
AIM2	9.0192	29.016	8.658	21.3276	11.6959	13.3745	38.2044	7.5853	6.7993	4.7149	71.0575	2.5974	0	57.2917	8.8375	3.95	12.2302	49.7953	52.8	72.2311	4.7319	6.8966	29.9853	19.368	31.5315	3.2362	23.5156	24.8023	8.7719	8.4906	12.1043	42.6388	7.0734	62.6415	19.279	26.6061	9.3257	6.2443	42.0532	4.329	23.8095	47.6935	56.8445	43.8793	17.8739	12.0755	78.0454	10.1966	165.385
AIMP1	943.179	893.524	1056.93	807.017	1072.27	1334.67	910.151	1019.57	1065.22	639.729	904.184	976.883	919.106	1330.05	902.135	1660.12	711.878	1141.63	960.968	983.622	1121.81	941.124	1088.44	1177.45	1231	371.942	1177.89	1031.11	1207.91	1165.18	833.966	968.117	830.362	1113.16	1172.45	1168.38	959.993	900.235	1188.21	1351.09	917.619	1717.04	732.332	782.209	645.569	1083.83	1013.59	373.7	760.933
AIMP2	332.232	332.013	234.08	227.875	244.751	232.119	350.915	277.516	385.939	366.241	320.022	297.909	313.009	575.74	294.833	356.237	222.914	271.675	234.512	145.918	405.26	424.828	202.933	409.174	397.045	451.823	154.301	350.171	376.365	300.311	265.801	340.45	298.373	320.709	272.219	331.674	320.416	149.791	338.837	277.238	268.257	472.307	373.109	268.123	228.335	111.215	186.946	227.553	105.673
AIP	836.528	902.499	708.875	828.579	459.064	610.082	673.161	788.875	1020.57	1368.5	668.466	535.065	773.562	820.833	764.786	1414.1	804.317	616.632	612	1738.9	1005.52	877.241	592.935	432.212	342.342	1216.83	544.778	472.162	650.097	780.189	795.158	588.093	483.643	642.264	407	926.671	906.026	615.505	795.3	546.32	674.286	1071.93	622.97	584.393	588.899	746.415	869.264	983.248	661.538
AJAP1	0	0	0	1.0664	0	0	0	0	0	1.1787	0.8773	3.8961	0	0	0	0	0	0	0	0	0	0	0	3.0581	2.7027	0	0	0	0	0.9434	0.9311	0	0	0	0	0.6489	0	1.7841	0	0	0	0	0	0.9973	0	3.0189	0	1.4567	0
AK1	47.3506	51.0282	54.1126	44.7881	26.3158	77.1605	58.8348	68.9001	42.8353	266.392	178.082	80.5195	35.3133	58.3333	76.8185	80.3165	66.9065	136.107	75.2	567.683	63.8801	86.8966	73.5123	88.685	181.081	91.6936	36.8411	67.058	86.7446	138.679	61.4525	67.5784	89.3015	107.924	44.9843	63.5951	63.1277	37.4655	70.5009	69.2641	150.476	106.333	113.689	47.8684	98.777	479.245	234.809	345.229	17.3077
AK2	4138.67	3030.67	4888.47	4269.99	2583.33	4273.66	4914.61	4979.77	2438.89	2421.1	3669.55	2990.91	2876.37	5796.88	2645.14	6069.82	2482.73	2877.34	3143.2	3171.75	3017.35	3273.79	2358.2	4737	4009.91	1710.9	3067.22	6381.53	4154.97	10277.4	2773.74	5137.57	4257.29	4059.62	4986.83	3389.36	2704.45	3300.2	5077.92	4357.96	2550.48	6394.84	9244.78	3581.15	2437.97	2446.79	3795.29	4399.85	2116.35
AK3	1220.97	1188.66	2168.83	1240.2	2456.14	1511.32	2131.04	2150.44	2319.9	1324.3	2136.99	1307.79	1957.56	2165.62	2345.34	1739.31	1016.55	1394.27	1376.8	1364.37	2089.91	2155.86	3077.85	1772.68	2629.73	1749.73	2324.91	2444.4	2924.95	2989.62	1628.49	1938.05	2720.6	2122.26	2352.03	1714.47	1917.5	2289.86	1920.22	2707.36	1301.9	2630.96	1645.01	1232.61	1173.1	2224.15	1729.11	1354.7	1175
AK3L1	462.232	411.227	59.5238	225.007	40.9357	422.839	32.0917	227.56	119.667	28.8787	29.8266	148.052	145.251	2.0833	22.4337	28.9666	312.95	366.825	444.8	11.771	101.735	407.586	174.108	32.6198	40.5405	320.388	261.807	25.7209	20.4678	141.509	545.624	31.3757	24.7569	9.0566	174.582	110.318	40.8895	828.702	320.346	121.212	353.333	285.379	76.5661	449.763	196.613	46.0377	54.4972	436.271	100
AK5	91.3191	41.0227	71.4286	107.705	160.819	31.893	27.5072	27.8129	35.3561	13.5553	76.321	102.597	15.3246	35.4167	38.0693	96.1165	20.1439	47.3056	47.2	1.6051	40.2208	45.5172	34.8216	66.2589	28.8288	86.2999	53.302	37.6627	97.4659	19.8113	24.2086	58.7289	32.7144	51.3208	80.329	29.8507	28.6944	85.6355	188.002	198.268	45.7143	59.4214	41.7633	44.8766	43.2738	20.3774	122.451	60.4516	436.538
AK7	0	6.0033	4.329	4.2655	1.462	1.0288	3.0564	4.4248	0	14.7341	4.3863	2.5974	1.9989	0	13.5962	0	2.8777	9.9591	4	0	0.7886	0	0.9673	18.3486	18.018	3.2362	3.1354	4.593	1.9493	0.9434	7.4488	0	2.6525	3.0189	0	6.4893	1.4347	0.892	0.6184	3.4632	12.381	3.9093	8.1206	0.9973	2.8222	3.0189	10.0921	2.185	0
AKAP1	965.051	517.286	839.827	1264.73	337.719	1548.35	1279.85	773.072	963.454	950.052	1102.71	412.987	740.913	992.708	912.305	595.132	482.734	499.613	638.4	329.588	889.59	1173.1	500.077	727.829	1111.71	1158.58	858.319	1025.16	557.505	607.547	441.341	786.806	904.509	963.019	871.838	952.628	969.871	762.692	1283.86	870.996	620.952	834.245	924.594	685.116	389.464	572.076	717.21	2024.04	404.808
AKAP10	1144.31	987.546	1414.5	1666.76	1476.61	1114.2	1268.39	922.25	1219.79	773.243	1295.7	538.961	912.15	742.708	989.123	954.582	653.957	881.377	895.2	321.562	1034.7	1155.86	1335.8	1190.62	1028.83	654.8	1346.66	1356.78	1396.69	1219.81	870.577	1189.86	1051.28	1040	1234.92	1185.59	1228.12	1784.07	825.603	1033.77	945.714	1228.3	1254.06	904.513	1197.55	1027.17	1302.55	327.021	950.962
AKAP11	1564.83	976.539	2596.32	2510.26	5906.43	1633.74	2517.67	2512.64	3375.83	1645.5	3138.81	2576.62	3192.86	930.208	2293.68	629.366	1086.33	1852.39	1939.2	477.796	2396.69	3384.83	3924.2	2642.2	2945.05	1335.49	3910.64	4114.42	2285.57	1212.26	1929.24	2779.57	3591.51	3144.91	3627.66	2814.41	2576.04	3132.83	1839.21	2716.02	2256.19	1630.96	2364.27	2223.88	1507.06	3473.96	3275.89	1496.72	2541.35
AKAP12	41.7136	288.159	21.645	74.6468	5.848	272.634	23.6867	5.689	35.3561	45.9702	9.6498	7.7922	1.3326	0	109.449	3.95	35.2518	1393.44	34.4	10.7009	26.8139	33.1034	5.8036	74.4139	11.7117	7.5512	14.1093	67.9766	18.5185	5.6604	901.303	26.5487	5.305	2.2642	12.8526	17.5211	23.6729	8.0283	11.7502	6.9264	68.5714	7.8186	60.3248	116.679	602.07	8.3019	50.4604	2.9133	10.5769
AKAP13	3526.49	4081.25	5204.55	3623.57	8861.11	3185.19	6228.08	3505.06	6271.63	6029.76	6825.9	2923.38	7888.86	4125	6382.73	3202.13	5241.01	4098.98	5115.2	5258.43	7209.78	6313.1	7241.93	4557.59	3402.7	3408.85	8023.52	5164.38	5428.85	4143.4	5723.46	5298.47	6326.26	5037.74	6231.39	6789.75	7336.44	6724.17	5254.79	5707.36	7547.62	3546.52	9893.27	6267.76	8356.54	7344.91	6990.44	3842.68	12264.4
AKAP2	736.437	618.892	713.452	412.231	1381.92	444.753	12.7373	276.991	2248.11	1293.48	302.749	461.467	2004.84	0	2216.64	46.1886	1002.88	675.905	1166.76	135.554	2545.23	2139.24	2074.38	204.771	367.189	1790.66	1165.75	301.642	426.413	299.123	1354.39	425.567	20.557	172.347	831.47	1411.43	1635.33	510.236	516.487	1286.1	1481.9	964.941	606.021	1215.32	1029.74	10.0906	336.732	396.883	205.712
AKAP3	15.7835	6.0033	6.4935	23.4604	4.386	21.6049	6.8768	8.2174	4.0796	5.8936	6.1408	1.2987	1.9989	16.6667	2.0394	2.6333	1.4388	6.6394	11.2	1.6051	2.3659	4.1379	5.8036	8.1549	18.018	4.315	47.815	11.9418	61.4035	14.1509	5.5866	4.827	6.1892	5.283	2.1421	10.3829	3.5868	1.7841	4.329	6.0606	19.0476	13.2916	9.2807	15.9561	6.5851	36.9811	12.1105	10.925	0.9615
AKAP5	129.65	96.0531	122.294	126.9	236.842	104.938	101.624	85.335	86.3505	35.9511	160.537	135.065	69.2941	22.9167	112.848	35.5499	38.8489	113.699	137.6	9.6308	66.2461	74.4828	186.683	133.537	96.3964	141.316	141.877	124.011	163.743	86.7925	78.2123	165.728	98.1432	49.0566	154.232	72.6801	87.5179	58.8744	54.4218	131.602	91.4286	71.1493	80.0464	94.7395	103.481	69.434	147.344	77.9315	67.3077
AKAP6	13.5287	6.0033	16.2338	21.3276	159.357	0	12.9895	8.8496	9.519	31.2362	33.3356	0	1.9989	1.0417	69.3406	1.3167	0.7194	16.5984	20	2.6752	7.8864	4.8276	25.149	12.2324	12.6126	2.1575	47.0312	8.2674	6.8226	8.4906	13.0354	24.9397	78.6914	21.1321	27.8474	70.7333	47.3458	13.3806	12.3686	1.7316	17.1429	19.5465	2.3202	12.9643	9.4073	21.1321	25.5666	8.74	0
AKAP7	22.5479	16.0088	37.8788	18.1285	255.848	3.0864	169.627	8.8496	154.343	102.549	240.367	6.4935	213.879	162.5	229.776	80.3165	11.5108	47.3056	20.8	225.254	128.549	128.276	128.647	329.256	317.117	158.576	16.4609	163.511	58.4795	10.3774	15.8287	235.72	183.024	396.226	184.221	264.114	192.252	210.521	282.622	108.225	40	22.674	389.791	31.9122	11.2888	188.679	419.157	62.6366	231.731
AKAP8	1659.53	1077.6	1700.22	1462.01	947.368	1126.54	1062.85	1037.29	1064.76	1194.05	1108.85	741.558	1047.41	839.583	989.803	2576.71	1051.08	1146.12	1044	1819.69	1084.38	1054.48	749.632	861.366	1055.86	688.242	1082.5	1135.39	779.727	1266.04	1265.36	1100.56	1201.59	1089.06	1049.63	1216.09	1028.69	1059.74	1079.16	967.965	1142.86	1189.21	889.791	1797.06	1188.15	969.057	835.624	1275.31	814.423
AKAP8L	1411.5	1721.95	1152.6	1516.4	976.608	1049.38	977.268	1437.42	1572.67	2079.27	1336.06	640.26	1130.69	1100	1328.35	1803.83	1643.88	1559.42	1137.6	4052.97	1249.21	1035.17	1342.57	844.037	1667.57	1176.91	1198.51	916.765	941.52	1083.02	1327.75	1025.74	1186.56	1145.66	890.046	1285.53	1248.21	816.214	1334.57	905.628	1506.67	1071.93	1059.16	1310.4	1269.99	1149.43	1238.63	1450.84	591.346
AKAP9	9571.59	4574.53	7032.47	9642.23	14327.5	15411.5	6082.14	5146.02	6588.48	2599.68	6410.08	1912.99	6173.83	4636.46	6340.58	5390.42	6376.26	8342.38	9117.6	1459.6	4836.75	6533.79	10553.9	8774.72	8054.05	1994.61	10919.9	8530.14	10136.5	6638.68	6309.12	6078.84	5929.27	5565.28	7662.32	6070.73	6533	4400.42	5089.05	8335.06	9780	6151.68	5776.1	11508.4	7946.38	2749.43	4597.28	1024.04	4378.85
AKD1	731.68	430.238	545.455	577.979	980.994	476.337	441.643	513.274	465.749	254.015	467.576	207.792	371.789	417.708	442.556	317.316	448.921	677.216	371.2	50.8293	386.435	303.448	1091.08	605.505	343.243	128.371	380.952	641.185	835.283	549.057	499.069	383.749	492.485	270.943	529.101	365.996	439.024	354.139	119.357	663.203	555.238	425.332	295.824	598.355	594.544	316.226	262.394	173.343	96.1538
AKIRIN1	1351.75	1456.8	1686.15	1012	1358.19	1054.53	1107.16	1261.69	1489.04	1017.24	1416.76	2629.87	1187.99	1303.12	1231.14	2347.61	993.525	1585.15	1460	1507.22	1571.77	1426.9	1615.34	1457.7	1554.95	1896.44	1602.98	1139.99	1697.86	1917.92	1543.76	1131.94	1053.05	1422.64	1404.15	1462.69	1068.87	1974.97	1028.45	1440.69	1528.57	1764.66	1350.35	1879.83	1269.05	1272.45	1486.9	1123.09	1404.81
AKIRIN2	498.309	586.324	1064.94	473.474	460.526	615.226	714.422	686.473	649.329	777.369	624.604	4314.29	1282.61	1212.5	583.957	1242.93	1046.76	729.501	498.4	2132.69	735.016	563.448	631.626	692.151	817.117	1404.53	899.863	805.615	886.94	823.585	991.62	711.183	832.891	1035.47	887.904	778.715	530.129	672.596	768.707	835.498	739.048	1035.18	1059.16	622.289	873.942	724.528	672.132	1042.97	1404.81
AKNA	5500.56	7946.39	7242.42	4757.13	4052.63	4683.13	3698.19	4343.87	5754.21	6480.04	7345.24	6019.48	5150.41	3518.75	5004.08	5540.52	9230.94	4700.68	4821.6	5369.72	6606.47	7177.24	4894.37	3553.52	2752.25	11438	4847.34	5600.72	3807.99	3872.64	7291.43	6205.15	4311.23	3824.15	3565.54	5202.47	6028.69	6094.4	5570.81	3581.82	9488.57	4012.51	6255.22	6256.79	9038.57	6524.53	7746	9769.12	8920.19
AKR1A1	1430.67	2421.34	948.052	1500.4	980.994	1198.56	1240.88	1284.45	1138.87	1317.22	1939.61	576.623	1417.2	1895.83	1275.32	1972.36	1030.94	1886.41	1565.6	1822.36	1258.68	1108.97	946.955	1023.45	936.036	1218.99	892.024	1062.82	1372.32	1208.49	1804.47	1140.79	1032.71	1366.04	986.441	1675.54	1331.42	830.486	1233.77	1421.64	1559.05	1702.11	624.13	2051.36	889.934	2570.57	2340.69	2307.36	977.885
AKR1B1	217.587	136.075	91.9913	38.3898	279.24	62.7572	630.372	87.8635	470.508	586.415	827.249	32.4675	697.605	837.5	982.325	608.299	92.0863	95.441	42.4	1559.12	623.817	257.241	21.2799	619.776	638.739	582.524	574.564	686.196	587.719	301.887	234.637	624.296	590.628	689.811	531.243	1061	822.812	149.862	720.47	416.45	593.333	437.06	467.517	247.32	126.999	356.226	657.33	529.497	361.538
AKR1C1	13.5287	68.0376	2.1645	10.6638	0	23.6626	7.6409	7.5853	4.0796	5.8936	17.5451	10.3896	7.9955	12.5	28.552	32.0344	1.4388	26.5575	43.272	31.5677	6.3091	22.7586	1.9345	9.1743	1004.92	9.7087	21.164	25.7209	52.6316	1.8868	12.1043	139.984	40.672	6.7925	10.7105	58.5724	7.1736	9.8124	4.329	136.364	27.619	32.8382	187.935	7.9781	0.9407	31.1925	22.8754	18.2229	7.6923
AKR1C2	6.7644	7.0039	0	4.2655	1.462	0	3.0564	8.8496	2.7197	2.9468	4.3863	10.3896	6.6629	3.125	6.7981	2.6333	0.7194	3.3197	59.2	10.7009	3.1546	5.5172	0	4.0775	124.324	3.2362	3.1354	7.3488	1.9493	0	12.1043	9.6541	39.7878	12.0755	1.0711	52.5633	3.5868	0.892	4.329	15.5844	0.9524	2.3456	23.2019	0.9973	4.7037	14.3396	2.6912	0	0.9615
AKR1C3	385.569	807.446	14.0693	331.645	532.164	115.226	566.189	577.118	756.757	700.162	618.463	344.156	675.617	863.542	708.362	631.999	82.0144	253.956	296	375.602	932.965	864.138	1018.53	670.744	2402.7	595.469	945.326	676.091	441.521	353.774	411.546	823.813	894.783	722.264	924.319	738.481	606.887	370.195	486.704	952.381	380.952	164.191	732.019	163.55	79.9624	1970.57	624.363	117.261	210.577
AKR1E2	74.4081	133.073	1.0823	13.863	0	29.8354	11.4613	10.1138	3.3996	2.3574	24.5631	16.8831	19.3224	5.2083	0.6798	111.482	7.1942	29.8772	121.528	2.1402	24.4479	62.7586	0.9673	12.2324	110.396	33.4412	28.2187	2.7558	5.848	0.9434	28.8641	71.601	50.3979	16.6038	0	167.904	2.8694	55.3063	0	78.355	77.1429	63.3307	35.9629	19.9452	18.8147	60.1283	49.7876	71.362	17.3077
AKR7A2	742.954	752.416	599.567	471.341	298.246	415.638	660.172	645.386	613.293	1065.57	598.286	531.169	568.345	754.167	1093.81	1009.88	605.755	336.948	576.8	580.524	643.533	666.897	482.667	610.601	392.793	1330.1	504.017	481.348	521.442	444.34	563.315	698.311	485.411	568.302	419.853	598.313	729.555	632.454	925.17	477.056	562.857	588.741	758.701	614.311	357.479	566.793	659.349	1149.31	583.654
AKR7A3	23.6753	4.0022	11.9048	65.0493	2.924	4.1152	12.2254	42.3515	5.4394	11.1979	14.9133	6.4935	5.3303	7.2917	17.6751	7.9	19.4245	16.5984	10.4	27.2873	8.6751	11.0345	11.6072	3.0581	4.5045	7.5512	7.8385	15.6162	4.8733	13.2075	15.8287	13.6766	21.2202	11.3208	16.0658	11.0318	8.6083	14.2726	11.1317	8.658	10.4762	8.6005	15.0812	10.9698	6.5851	12.0755	16.1473	16.7516	6.7308
AKR7L	27.0575	19.0105	34.632	60.7838	17.5439	6.1728	9.1691	33.5019	6.7993	3.5362	10.527	11.6883	9.9943	29.1667	22.4337	51.3499	10.0719	17.4284	12	25.6822	5.5205	6.8966	16.4436	10.1937	9.009	11.8662	22.7317	12.8604	3.8986	21.6981	16.7598	18.5036	5.305	6.7925	34.2737	14.2764	10.043	28.5452	8.0396	24.2424	14.2857	14.8554	13.9211	21.9397	12.2295	19.6226	6.0552	25.4916	0
AKT1	3236.75	3654.02	2775.97	2497.47	1508.77	2645.06	2831.71	2760.43	3454.02	3921.61	3066.88	4255.84	3363.43	3148.96	3453.43	3635.31	5328.06	2673.18	2500.8	6622.26	3238.17	3382.76	1550.53	2361.88	2429.73	4603.02	2759.16	3483.34	2329.43	2670.75	3331.47	4175.38	4259.06	2796.23	1755.46	2425.7	3058.11	2424.56	3276.44	2107.36	3210.48	2939.01	2987.24	3279.98	4335.84	1880.75	1625.5	4543.34	2769.23
AKT1S1	599.774	648.358	589.827	564.116	210.526	474.28	666.285	518.331	539.861	1096.8	589.514	1553.25	370.457	731.25	624.065	687.299	900.719	546.089	633.6	1350.45	630.126	677.241	547.473	459.735	645.946	860.841	295.512	462.057	445.419	587.736	539.106	522.124	450.044	475.472	414.498	476.963	624.103	433.53	590.6	418.182	537.143	588.741	568.446	518.574	542.803	452.075	358.605	1168.24	413.462
AKT2	4631.34	5241.9	3413.42	4225.01	1624.27	2566.87	2785.86	3655.5	2702.7	4539.86	2944.06	5120.78	1996.87	1836.46	2905.51	3324.58	5787.05	3696.47	4962.4	4777.96	2761.04	2461.38	1756.56	2074.41	2070.27	2817.69	2261.41	2302.02	2087.72	2603.77	3727.19	2608.21	2710.88	2281.51	2023.22	2604.8	3045.19	1914.31	2632.03	2021.64	3795.24	2591.87	2098.61	4864.62	3591.72	2766.79	2415.37	6037.14	1989.42
AKT3	374.295	195.108	96.3203	437.217	114.035	246.914	66.4756	66.3717	61.1933	57.1681	330.724	16.8831	711.597	27.0833	45.5472	51.3499	227.338	322.01	246.4	48.1541	103.312	124.828	1162.66	63.2008	102.703	65.8037	1428.96	68.8952	41.9103	46.2264	216.015	90.9091	42.4403	86.0377	152.09	428.942	110.474	526.302	95.2381	121.212	306.667	96.9507	560.325	245.325	336.783	879.245	942.6	956.3	67.3077
AKTIP	137.745	135.385	193.344	168.03	136.974	210.844	103.06	201.719	133.551	49.2589	241.078	101.208	117.26	192.208	39.5173	116.025	171.345	372.419	144.136	51.8406	146.609	107.124	54.4282	88.1142	76.5225	50.0539	136.116	151.753	193.343	183.802	176.089	169.767	161.565	152.43	102.211	113.55	95.7963	70.0516	130.074	138.996	237.286	229.914	156.021	149.708	153.001	100.491	236.841	76.402	121.846
ALAD	1177	1184.65	1054.11	1435.35	840.643	1262.35	1348.62	994.311	853.306	2972.74	892.166	564.935	791.552	965.625	2218.22	936.148	1592.09	1390.12	1575.2	741.038	999.211	810.345	682.891	2807.34	1757.66	855.448	967.274	972.8	731.969	959.434	1199.26	1053.9	1112.29	932.83	933.959	1408.83	1266.86	983.917	1187.38	1008.66	1507.62	1073.49	1790.02	1322.36	1450.61	1120.75	1369.83	1083.76	1075
ALAS1	2148.82	803.444	832.251	4409.49	410.819	5233.54	1131.61	862.2	919.939	722.558	535.124	659.74	604.324	843.75	527.532	817.649	1188.49	791.746	979.2	2416.27	965.3	1161.38	509.75	674.822	549.549	1343.04	431.119	1153.76	839.181	1098.11	722.533	1097.35	931.919	993.962	757.235	815.704	629.125	1139.13	1008.04	653.68	562.857	1238.47	863.109	647.22	1456.26	537.359	649.257	1182.81	610.577
ALAS2	155.581	602.333	268.398	895.761	241.228	366.255	826.743	783.186	106.068	15875.6	2917.74	398.701	1.9989	222.917	6598.23	192.233	13072.7	1430.79	943.2	25.6822	74.9211	254.483	627.757	3587.16	6690.99	172.6	304.919	67.9766	37.037	80.1887	443.203	679.002	3.5367	129.811	63.1922	737.184	540.889	20.5168	13.6054	570.563	2958.1	177.482	1283.06	914.485	1171.21	8.3019	6627.8	367.079	0
ALCAM	2329.2	1839.02	983.766	2171.15	3108.19	3120.37	1996.56	1098.61	287.608	1237.66	1175.52	511.688	1405.87	1686.46	1511.9	1019.1	2644.6	2863.23	2294.4	897.271	750.789	273.103	997.253	2565.75	833.333	72.2762	5521.46	1675.53	460.039	745.283	2525.14	1361.22	1430.59	2728.3	2147.46	2323.17	1693.69	3165.84	2667.9	2577.49	1870.48	1389.37	1107.89	3097.48	2252.12	1000.75	1061.69	469.046	2232.69
ALDH16A1	387.824	651.36	574.675	473.474	384.503	402.263	638.778	541.719	694.204	1438.04	487.752	383.117	430.423	740.625	709.042	789.999	900	474.715	537.6	1189.41	668.77	817.931	222.472	405.709	480.18	1086.3	359.788	373.871	423.977	310.377	625.698	584.071	491.6	443.774	279.545	623.621	975.61	401.417	583.797	258.009	479.048	444.879	517.401	558.464	633.114	611.321	345.149	1004.37	378.846
ALDH18A1	1697.86	2210.22	1445.89	1249.8	1510.23	1566.87	2359.5	1868.52	1880.67	2046.26	1130.78	684.416	1530.47	2087.5	2383.41	1731.41	1457.55	1615.86	2376.8	474.585	2268.14	2168.97	1685.95	2148.83	2165.77	1475.73	1428.96	1845.47	1846	1869.81	1884.54	2222.04	1663.13	1839.25	2068.2	1817.65	1755.38	1904.5	2136.67	1589.61	1935.24	1645.82	1223.9	2413.36	975.541	1715.47	1537.36	2115.08	665.385
ALDH1A1	7.8918	6.0033	29.2208	28.7923	5.848	21.6049	60.3629	13.9064	2.7197	24.7532	71.0575	18.1818	0.6663	36.4583	61.1829	6.5833	0	34.0268	36.8	3.7453	18.1388	16.5517	13.5417	304.791	2287.39	0	21.164	4.593	5.848	0.9434	10.2421	370.072	917.772	368.302	35.3448	38.2868	44.4763	4.4602	16.6976	368.831	210.476	36.7475	535.963	11.9671	2.8222	755.472	199.823	11.6533	17.3077
ALDH1A3	8.8275	9.4652	30.7684	37.8886	3.9035	13.3745	46.7087	21.4033	28.1693	56.7025	23.6069	15.3506	13.8522	0	153.297	0	0	14.0506	13.936	0	39.4953	16.0345	0	94.0367	42.6757	10.9169	19.6904	120.089	3.8986	4.8585	55.6145	7.5221	19.5756	26.0528	29.5718	69.1694	39.0818	14.8524	29.7588	19.6277	71.181	18.6787	81.1369	9.464	3.1703	4.5057	118.144	8.0044	0
ALDH1B1	360.767	451.249	253.247	171.688	138.889	221.193	546.323	379.899	329.764	173.272	471.085	179.221	215.211	584.375	240.653	168.533	233.813	264.745	295.2	59.39	343.849	351.034	75.4469	685.015	615.315	535.059	233.588	433.58	487.329	385.849	251.397	625.101	431.477	475.472	173.511	269.306	350.072	388.928	379.097	374.892	347.619	467.553	426.914	310.147	162.747	186.415	183.676	592.862	162.5
ALDH1L2	16.9109	58.0321	70.3463	89.5761	55.5556	13.3745	43.553	46.7762	22.4375	11.1979	37.7219	14.2857	13.3258	5.2083	23.7933	15.8	12.9496	96.271	599.2	2.6752	31.5457	37.931	60.9379	46.8909	59.4595	87.3786	33.7057	82.6742	36.0624	10.3774	73.5568	70.7965	50.3979	40.7547	37.4869	51.2654	26.5423	51.7381	74.2115	23.3766	89.5238	79.7498	147.332	63.8245	59.2662	23.3962	71.9901	103.423	62.5
ALDH2	577.227	1702.94	682.9	211.144	43.8596	790.124	179.561	254.741	7.4792	225.726	31.5811	70.1299	168.571	60.4167	59.1434	909.815	451.799	593.394	660.8	16.0514	14.1956	13.1034	350.151	267.074	33.3333	26.9687	70.5467	516.255	1649.12	161.321	954.376	1280.77	586.207	56.6038	167.084	349.773	116.212	111.505	476.809	221.645	560	163.409	31.3225	829.718	548.448	1323.02	746.141	915.514	577.885
ALDH3A2	1101.47	230.127	615.801	859.504	73.0994	915.638	336.199	259.798	633.69	64.2405	719.347	92.2078	722.257	233.333	142.08	742.599	558.993	557.708	212	247.726	366.719	377.931	548.441	242.61	337.838	212.513	576.132	356.418	468.811	350	641.527	209.171	320.955	640	48.1974	214.796	216.643	759.123	158.936	111.688	664.762	581.705	1187.93	335.079	422.389	62.6415	345.149	330.663	1129.81
ALDH3B1	2489.29	1489.82	954.545	2588.11	412.281	2107	2296.85	884.324	1039.61	3031.09	923.747	363.636	589.666	1919.79	690.687	1614.23	1568.35	1179.32	1332.8	4339.75	1082.02	1598.62	218.602	887.87	807.207	2790.72	1117.77	1433.94	230.994	811.321	1294.23	850.362	985.853	1569.06	1675.13	1516.55	2073.17	2071.31	2238.1	1090.04	1465.71	1355.75	2589.33	1042.13	1665.1	133.585	1392.71	230.881	2401.92
ALDH4A1	600.902	659.364	225.108	1615.57	255.848	696.502	405.731	333.123	399.116	1192.87	436.872	109.091	208.548	286.458	492.182	271.233	820.863	487.164	540	366.506	597.003	690.345	284.377	457.696	945.045	829.558	93.2785	203.011	160.819	241.509	564.246	422.365	240.495	204.528	287.042	704.737	741.75	705.601	321.583	321.212	279.048	204.066	535.963	510.596	524.929	106.415	164.837	749.454	201.923
ALDH5A1	621.195	941.52	783.55	619.568	1371.35	703.704	1810.12	1132.74	1622.3	1435.1	2423.85	929.87	629.643	1323.96	1586.68	396.316	518.705	882.207	1299.2	225.789	1834.38	1420	1423.82	2093.78	2593.69	1087.38	1392.12	1418.32	882.066	916.981	932.961	1402.25	1216.62	1337.36	1879.7	1109.02	1407.46	991.945	1203.46	1610.39	878.095	888.976	784.223	930.441	283.161	856.604	1204.99	1228.7	277.885
ALDH6A1	374.036	641.044	322.154	318.443	392.237	206.934	567.878	369.267	566.935	383.321	406.624	202.571	463.897	320.635	610.319	307.731	206.352	311.163	721.712	61.7549	569.211	555.172	268.688	499.49	479.613	701.974	422.99	423.614	464.25	447.566	525.307	659.887	570.044	515.207	489.011	451.94	623.91	588.423	462.975	431.784	424.781	248.819	443.828	430.516	261.627	416.672	273.462	328.558	159.615
ALDH7A1	195.04	481.266	101.732	158.891	20.4678	26.749	207.068	217.446	180.86	2.9468	145.624	90.9091	291.168	15.625	104.011	344.966	37.4101	200.011	256.8	33.7079	16.5615	117.931	17.4108	129.46	14.4144	112.19	76.0337	346.313	277.778	436.793	219.739	283.186	62.7763	55.0943	92.1106	153.147	95.4089	520.057	88.4354	94.3723	217.143	315.09	13.9211	167.539	95.9548	349.434	11.4377	20.3933	47.1154
ALDH8A1	28.1849	15.0083	38.961	41.5889	45.3216	14.4033	4.5845	9.4817	31.2766	7.6617	11.4043	23.3766	9.328	2.0833	14.9558	17.1166	7.9137	15.7685	20.8	6.4205	26.0252	8.9655	10.6399	13.2518	11.7117	0	10.9739	11.0232	24.3665	58.4906	23.2775	9.6541	14.1468	17.3585	20.35	11.6807	19.3687	16.0567	3.0921	10.3896	10.4762	8.6005	6.9606	9.9726	49.8589	85.283	6.0552	12.3816	14.4231
ALDH9A1	1018.04	1167.65	701.299	870.168	910.819	1337.45	1065.14	786.346	719.361	799.764	931.642	327.273	742.246	584.375	793.338	625.416	1076.26	1027.44	1341.6	760.3	871.451	834.483	901.494	800.204	629.73	611.65	610.621	694.464	684.211	780.189	1244.88	699.115	841.733	907.924	1096.76	923.426	982.066	973.212	862.09	770.563	1386.67	889.758	890.951	968.337	996.237	781.887	1225.85	472.688	748.077
ALDOA	17705.7	15617.6	11757.6	12637.7	7274.85	12882.7	11844.1	8618.2	8255.65	20635.9	10181.4	15341.6	11588.1	16178.1	12377.3	24912.6	17901.4	8577.24	10543.2	32726.6	9796.53	11875.9	7378.32	10499.5	8835.14	18611.7	8792.48	9133.67	6550.68	9566.98	12571.7	10186.6	8668.43	11498.1	6771.2	13451.7	11891.7	13539.3	15594.9	9010.39	10729.5	12980.5	11221.6	12629.3	12566.3	9492.08	7548.2	22632.9	11951.9
ALDOB	1.1274	8.0044	6.4935	7.4647	7.3099	9.2593	3.8204	6.9532	2.7197	6.483	6.1408	6.4935	3.9977	5.2083	6.7981	2.6333	13.6691	25.7276	15.2	0.535	7.8864	3.4483	17.4108	16.3099	5.4054	5.3937	10.9739	10.1046	10.7212	15.0943	8.3799	8.0451	14.1468	5.283	25.7053	3.8936	14.3472	4.4602	6.1843	6.9264	15.2381	8.6005	15.0812	2.9918	8.4666	13.5849	4.7096	7.2833	0.9615
ALDOC	62.0068	46.0254	95.2381	60.7838	8.7719	26.749	131.423	25.9166	70.7122	30.0575	71.0575	10.3896	111.27	45.8333	38.7492	86.8998	69.0647	36.5166	52	310.326	199.527	80	22.2472	47.9103	200	35.5987	32.9218	19.2907	88.694	28.3019	24.2086	102.172	105.217	161.509	98.5369	46.074	50.9326	10.7044	132.344	19.0476	45.7143	53.9484	53.3643	43.8793	36.6886	222.642	189.058	36.4166	67.3077
ALG1	457.125	503.358	290.411	516.46	287.208	356.708	485.104	349.621	422.145	377.416	479.427	138.26	260.126	582.302	383.95	308.323	445.374	362.402	502.808	208.052	448.194	454.745	76.6076	480.724	426.847	640.572	288.411	372.319	379.25	389.302	390.344	489.791	303.97	362.687	325.022	326.833	383.243	354.29	373.729	330.338	445.029	399.288	395.882	372.964	309.934	197.245	370.352	725.98	237.346
ALG10	226.607	134.074	330.087	444.681	551.17	152.263	427.889	447.535	444.671	167.379	437.749	685.714	359.13	114.583	309.313	64.5166	175.54	257.276	331.2	40.6635	287.855	414.483	398.514	510.703	435.135	344.121	464.041	542.894	448.343	276.415	212.291	541.432	486.295	481.509	635.135	360.156	296.987	421.041	362.399	432.9	226.667	310.399	262.181	240.339	299.153	551.698	460.871	317.553	304.808
ALG10B	443.067	312.173	625.541	699.547	951.754	379.63	645.654	1251.58	873.024	412.553	844.794	1270.13	596.995	448.958	674.371	260.7	305.036	730.331	404	225.789	690.063	914.483	1108.49	831.804	783.784	656.958	1454.83	1197.86	855.75	702.83	416.201	912.309	1066.31	880	1290.62	737.184	583.214	929.502	816.327	1014.72	391.429	795.153	418.793	382.947	438.382	1322.26	929.144	493.081	442.308
ALG11	149.944	85.047	67.0996	146.094	109.649	53.4979	74.8806	61.3148	169.301	55.4	92.1115	24.6753	72.6255	27.0833	94.4935	27.65	39.5683	74.693	121.6	4.8154	92.2713	86.8966	88.0214	61.1621	103.604	69.0399	60.3567	117.581	93.5673	41.5094	92.1788	119.067	116.711	78.4906	86.7553	105.775	65.2798	66.0107	55.0402	55.4113	74.2857	43.7842	42.9234	164.548	104.421	90.566	60.5524	63.3649	59.6154
ALG12	554.679	763.422	597.403	571.581	192.982	408.436	555.492	657.396	372.599	781.494	478.103	498.701	405.104	375	513.936	721.532	749.64	459.777	764.8	917.603	418.77	402.759	421.729	303.772	311.712	501.618	327.65	470.325	400.585	432.075	700.186	547.064	374.005	344.151	351.306	372.485	484.935	429.962	506.493	377.489	627.619	476.153	331.786	596.36	659.454	424.151	777.763	927.895	204.808
ALG13	1033.82	1012.56	2089.83	1192.22	1862.57	1083.33	1107.16	1664.98	1708.65	1067.33	1145.69	2022.08	1461.17	647.917	1012.24	1163.93	867.626	1581.83	1056.8	473.515	1925.87	1306.9	1218.76	1053.01	1410.81	929.881	1585.73	2480.23	898.635	1482.08	1016.76	1016.89	1332.45	1729.81	1440.57	1478.91	1193.69	1565.52	964.131	1538.53	1021.9	1272.09	892.111	1002.24	729.069	1303.4	1139.73	1203.93	1248.08
ALG14	50.7328	56.031	20.5628	39.4561	36.5497	21.6049	55.0143	39.823	20.3978	17.6809	41.2309	94.8052	25.9853	62.5	37.3895	60.5666	35.2518	43.9859	48.8	11.236	35.489	29.6552	89.9559	63.2008	72.0721	34.52	25.0833	45.9301	30.2144	52.8302	38.175	50.6838	31.8302	43.7736	24.6342	36.34	28.6944	31.2213	24.1187	38.961	38.0952	96.9507	34.8028	27.9232	28.222	26.4151	39.6955	24.7633	15.3846
ALG2	490.417	733.405	293.29	222.874	576.023	624.486	576.886	516.435	369.199	369.53	511.438	302.597	191.225	431.25	405.846	408.166	473.381	824.942	991.2	391.653	590.694	458.621	591	474.006	451.351	634.304	349.598	607.196	604.288	560.377	815.643	736.122	618.921	610.566	647.987	546.398	545.194	475.456	397.65	396.537	521.905	338.546	440.835	412.865	609.596	464.151	559.774	501.821	427.885
ALG3	1005.64	1390.77	901.515	1153.83	497.076	574.074	1049.86	975.98	926.738	1615.44	970.241	1915.58	848.852	1009.38	1135.96	884.798	1354.68	556.878	1092	1030.5	1092.27	1051.72	680.956	824.669	919.82	1126.21	741.525	783.568	556.53	860.377	908.752	870.475	656.057	846.793	601.932	1141.47	1000	883.116	1194.19	662.338	1040	1088.35	612.529	1248.57	864.534	683.019	633.109	2686.82	288.462
ALG5	471.251	384.212	299.784	466.009	173.977	457.819	284.241	321.745	269.93	155.592	258.789	336.364	229.203	445.833	303.875	571.432	307.194	506.252	540	262.172	327.287	300	312.428	484.2	300.901	104.639	307.27	324.267	307.992	338.679	423.65	318.584	245.8	322.264	324.529	399.091	268.293	321.133	399.505	309.957	434.286	547.303	266.821	477.686	301.035	231.698	240.191	182.083	192.308
ALG6	337.091	469.259	476.19	453.212	554.094	498.971	523.4	437.421	348.122	216.885	361.428	628.571	222.541	403.125	433.719	165.9	433.094	534.47	592.8	100.589	424.29	312.414	294.049	468.909	314.414	159.655	449.931	558.51	491.228	468.868	413.408	486.726	400.531	492.83	522.674	502.92	312.769	399.632	448.361	455.411	505.714	498.045	367.749	459.736	445.908	379.623	573.903	198.106	297.115
ALG8	670.801	726.401	585.498	699.547	596.491	544.239	910.029	555.626	562.978	492.707	672.853	1448.05	427.758	1115.62	716.519	588.549	516.547	566.007	735.2	266.453	674.29	552.414	614.215	768.604	675.676	505.933	546.345	665.987	650.097	844.34	586.592	731.295	575.597	850.566	793.651	767.683	733.142	558.415	753.865	670.13	480	659.109	696.056	726.004	350.894	387.17	942.6	435.543	279.808
ALG9	641.488	818.452	652.597	721.941	864.035	548.354	701.433	700.379	522.862	598.202	666.712	575.325	550.355	389.583	732.835	493.749	578.417	686.346	704	612.092	534.7	488.966	757.371	854.23	723.423	580.367	678.033	721.103	661.793	737.736	742.086	666.13	563.218	653.585	770.088	668.397	595.409	608.369	619.666	838.095	653.333	717.748	500	767.888	507.996	505.66	897.522	559.359	257.692
ALK	1.1274	2.0011	12.987	1.0664	2.924	2.0576	4.5845	4.4248	2.7197	0.5894	16.6678	12.987	13.3258	5.2083	6.1183	3.95	0	0	0.8	0.535	5.5205	0.6897	6.7709	2.0387	12.6126	12.945	7.0547	8.2674	0.9747	0	0	8.8496	7.0734	3.7736	18.2079	1.9468	0	0	7.4212	18.1818	1.9048	2.3456	6.9606	0	3.7629	6.7925	5.3824	26.22	8.6538
ALKBH1	173.619	253.14	247.835	236.737	127.193	215.021	258.262	253.477	225.735	180.934	227.208	181.818	140.587	256.25	214.14	125.083	160.432	250.636	241.6	109.684	228.707	202.759	285.344	174.312	209.91	173.679	239.859	225.976	236.842	216.981	223.464	247.788	246.684	198.491	243.129	219.338	291.966	222.117	119.975	194.805	215.238	207.193	171.694	174.52	188.147	209.811	214.625	198.835	210.577
ALKBH2	135.287	136.075	165.584	104.505	64.3275	180.041	154.346	239.57	149.583	128.481	156.151	246.753	103.941	142.708	118.967	209.35	100.719	174.284	108	138.577	201.104	139.31	100.596	217.125	161.261	175.836	149.716	191.988	159.844	193.396	128.492	164.924	137.047	123.019	126.384	151.849	96.8436	67.7948	128.633	107.359	146.667	257.232	60.3248	125.654	79.9624	133.585	126.487	225.055	11.5385
ALKBH3	303.269	388.214	239.178	316.716	276.316	366.255	286.533	330.594	202.618	292.324	300.898	63.6364	290.502	397.917	338.545	397.633	300	477.205	340.8	276.084	282.334	341.379	248.588	378.185	372.072	145.631	290.809	260.883	135.478	208.491	443.203	283.99	280.283	290.566	278.474	360.156	233.859	280.992	275.201	285.714	401.905	348.71	211.137	348.043	202.258	236.981	486.438	308.813	155.769
ALKBH4	389.673	253.78	262.435	345.732	211.988	343.704	239.282	252.724	347	295.925	209.067	264.117	195.023	197.698	280.143	256.973	191.396	161.644	209.016	224.355	259.803	243.083	455.96	240.571	171.315	471.025	158.323	216.101	286.949	169.915	219.646	239.139	169.655	126.143	174.271	203.725	255.265	108.142	160.519	181.203	189.752	141.251	218.19	128.846	214.713	125.245	139.284	149.993	105.981
ALKBH5	1669.97	1576.77	1683.05	1313.09	1150.16	1328	1904.41	1549.85	1622.58	1799.88	1836.46	3478.71	1747.99	1736.46	2295.57	2430.59	1314.91	1584.26	1700.03	1489.45	1766.63	1885.28	1623.08	1984.97	1937.57	3371.56	1441	1503.88	1717.98	1446.49	2000.14	1950.29	1866.93	1510.16	1311.78	1609.62	1793.59	1614.5	1676.25	1463.79	1923.91	1498.23	1914.81	2082.15	1725.71	1442.65	1421.83	1280.42	1478.09
ALKBH6	172.492	226.125	208.875	152.493	90.6433	243.827	165.807	209.229	150.263	334.758	157.905	446.753	135.923	134.375	159.755	208.033	380.575	179.263	174.4	611.022	139.59	142.759	64.8069	27.5229	136.937	148.867	154.419	165.349	64.3275	130.189	106.145	140.788	146.773	178.868	103.892	184.296	162.123	86.5276	181.818	97.8355	122.857	237.686	142.691	115.682	175.917	181.132	155.418	321.195	67.3077
ALKBH7	647.125	542.3	193.723	378.566	149.123	389.918	265.903	278.761	224.375	617.062	296.511	650.649	171.903	671.875	292.318	470.049	361.87	492.974	341.6	873.194	227.129	226.897	134.45	414.883	261.261	581.446	119.93	192.907	255.361	174.528	545.624	220.434	171.53	175.849	184.221	307.592	323.529	198.924	264.688	199.134	569.524	241.595	214.617	356.021	141.11	194.717	100.921	297.888	118.269
ALKBH8	148.816	158.087	244.589	250.6	352.339	221.193	398.09	214.286	308.686	143.215	349.147	111.688	210.547	272.917	247.451	142.2	97.1223	214.12	260	85.0722	260.252	275.172	300.82	323.14	383.784	64.7249	382.52	347.232	281.676	247.17	186.22	286.404	356.322	360	375.94	243.349	279.77	286.344	196.042	393.939	380	333.855	267.981	204.438	123.236	198.491	727.302	108.522	189.423
ALMS1	1604.28	992.548	1859.31	1877.9	7951.75	479.424	1944.6	1988.62	1613.46	1166.35	2587.9	793.506	2182.1	638.542	1884.43	520.082	708.633	1129.52	1567.2	355.27	1306.78	1635.86	1826.2	2273.19	3052.25	1238.4	1445.42	2954.23	1577	1484.91	1625.7	1750.6	1675.51	1772.83	2488.06	1417.91	1411.76	2070.42	1367.35	1956.71	1797.14	1236.12	2813.23	1930.69	1859.83	1948.68	1743.91	1257.83	841.346
ALMS1P	5.637	8.0044	5.4113	7.4647	26.3158	0	6.1127	9.4817	11.5587	5.8936	21.0541	0	2.6652	5.2083	4.7587	5.2667	0	1.6598	4	5.3505	1.5773	2.7586	3.8691	13.2518	8.1081	2.1575	7.0547	5.5116	10.7212	1.8868	0	5.6315	11.4943	7.5472	14.9948	3.8936	3.5868	5.3522	1.8553	2.5974	4.7619	4.6912	2.3202	3.989	2.8222	3.7736	14.1289	3.6417	3.8462
ALOX12	73.1454	36.17	26.1472	76.2143	36.5497	29.8663	19.9809	66.8584	34.7646	51.8285	41.4414	12.987	113.782	25	23.1135	32.9956	113.777	40.0437	36.12	53.5045	97.9416	42.3862	35.8469	20.3874	40.5405	201.618	22.0733	47.8316	22.4269	36.9811	28.9106	27.5704	25.8444	31.0642	28.9184	29.3056	42.5753	23.2197	19.932	29.7143	21.1524	36.7787	25.5568	32.0718	43.6971	49.2981	31.7093	39.0095	30.7692
ALOX12P2	1093.57	595.329	3.2468	448.947	8.7719	316.872	42.7889	659.924	6.1193	12.3766	799.177	2.5974	5.3303	0	17.6751	55.2999	314.389	458.947	867.2	81.862	7.8864	14.4828	18.3781	191.641	298.198	4.315	0.7839	873.591	14.6199	609.434	25.1397	177.796	264.368	2.2642	251.698	12.9786	40.8895	10.7044	18.5529	830.303	1109.52	42.2205	52.2042	532.535	26.3405	529.057	10.0921	500.364	44.2308
ALOX15	6.7644	12.0066	0	1.0664	2.924	16.4609	0	0	1.3599	3.5362	1.7545	1.2987	3.3314	0	0.6798	0	15.1079	0.8299	12	0.535	5.5205	17.2414	0	0	0	12.945	0	3.6744	6.8226	0.9434	6.5177	1.609	0	0.7547	0	9.085	5.7389	0	0	0	14.2857	0	1.1601	11.9671	45.1552	4.5283	0.6728	3.6417	0
ALOX15B	111.612	163.09	1.0823	7.4647	1.462	2.0576	2.2923	0	0.6799	0.5894	0.8773	0	0	0	3.399	2.6333	182.734	109.55	1.6	0	19.7161	0.6897	5.8036	0	0	21.575	0	2.7558	0	0.9434	285.847	1.609	0	0	0	0.6489	0	2.6761	0	0	7.619	5.473	2.3202	120.668	94.0734	0	6.0552	1.4567	0
ALOX5	1899.66	4056.24	114.719	665.423	33.6257	2181.07	45.8453	116.941	390.957	227.494	381.605	19.4805	455.742	126.042	58.4636	435.816	6841.73	2838.33	1842.4	2869.98	1070.98	511.034	26.1162	65.2396	89.1892	135.922	50.1666	291.197	76.9981	100.943	3248.6	2041.03	1194.52	1236.98	121.029	210.253	441.894	183.76	1231.91	265.801	3335.24	426.114	545.244	4218.4	10019.8	367.547	503.931	2584.85	1347.12
ALOX5AP	165.727	175.097	95.2381	344.442	252.924	559.671	315.568	159.292	56.4338	607.043	333.356	279.221	75.2907	446.875	363.698	1533.91	169.784	409.981	79.2	2141.79	348.58	174.483	123.81	128.44	281.982	97.0874	43.8957	259.046	663.743	904.717	320.298	444.891	61.8921	650.566	1419.15	906.554	545.194	223.901	860.235	177.489	132.381	626.27	3256.38	109.698	650.988	70.9434	659.349	741.442	1571.15
ALPK1	1396.84	971.537	1847.4	2370.57	1840.64	1597.74	1741.36	1371.05	1145.67	795.639	1112.36	274.026	980.778	822.917	1044.87	999.348	1119.42	1367.71	1422.4	837.346	1478.71	1002.76	1322.25	1507.65	1300	357.066	1657.85	1451.39	1196.88	1276.42	1331.47	1300.88	1627.76	1186.42	1796.16	1280.34	1255.38	1948.21	970.934	1587.88	1040.95	1319.78	1335.27	1472.95	1078.08	1744.91	1066.4	812.09	1431.73
ALPK3	74.4081	37.0205	33.5498	127.966	26.3158	45.2675	39.7326	20.2276	745.198	32.4149	28.9493	10.3896	46.6402	16.6667	50.9857	21.0666	13.6691	41.4961	45.6	31.5677	717.666	101.379	35.7889	30.581	18.018	212.513	7.0547	30.3139	36.0624	31.1321	92.1788	32.9847	105.217	32.4528	33.2027	33.0954	57.3888	29.4372	87.1985	31.1688	96.1905	25.8014	39.4432	80.7779	69.6143	40	26.9122	32.0466	8.6538
ALPL	57.4972	24.0133	24.8918	127.966	1.462	26.749	24.4508	11.378	0.6799	65.4192	9.6498	20.7792	1.9989	26.0417	74.7791	148.783	3.5971	27.3874	3.2	13.3761	38.6435	2.069	0	38.736	0.9009	6.4725	11.7578	23.8837	0	1.8868	196.462	1.609	8.8417	0.7547	4.2842	30.4997	13.6298	13.3806	8.0396	0.8658	187.619	190.774	54.5244	19.9452	3.7629	6.7925	61.898	7.2833	0
ALS2	1684.33	2856.58	1147.19	2337.51	3400.58	3575.1	2183.76	1811	6952.92	2720.5	1146.57	480.519	3303.46	953.125	1898.71	675.449	2910.07	3618.46	1874.4	591.225	5610.41	4160.69	3094.29	1300.71	1042.34	2225.46	3338.43	2359.89	1696.88	1683.02	2919.93	1523.73	3016.8	1313.21	1327.04	2807.27	3774.03	5518.14	2358.07	1374.03	3232.38	999.218	552.204	1777.11	6155.22	2616.6	1599.93	1989.8	650
ALS2CL	146.561	331.183	12.987	307.118	1.462	93.6214	96.2751	36.0303	949.856	25.9319	307.916	1.2987	359.796	103.125	2.0394	30.2833	359.712	385.914	834.4	364.901	667.981	509.655	38.6907	1.0194	108.108	1298.81	205.369	129.523	7.7973	13.2075	318.436	123.089	368.7	577.359	66.4053	20.1168	40.8895	32.1133	121.831	123.809	394.286	3.9093	63.8051	414.859	422.389	630.943	240.864	919.884	62.5
ALS2CR11	33.8219	14.0077	38.961	40.5225	21.9298	7.2016	15.2818	23.3881	21.0777	12.3766	25.4403	35.0649	10.6606	17.7083	34.6703	2.6333	6.4748	13.2788	29.6	1.6051	11.041	6.2069	21.2799	37.7166	27.9279	22.6537	39.1926	58.7906	68.2261	17.9245	15.8287	46.6613	36.2511	27.9245	43.9132	14.2764	13.6298	15.1646	9.8949	22.5108	24.7619	16.4191	29.0023	20.9424	18.8147	2.2642	37.0043	6.555	18.2692
ALS2CR12	11.274	35.0193	5.4113	44.7881	17.5439	8.2305	24.4508	15.8028	25.1572	40.0766	13.1588	9.0909	9.9943	11.4583	59.1434	1.3167	24.4604	15.7685	22.4	9.6308	15.7729	15.8621	20.3126	68.2977	125.225	29.1262	7.0547	21.1279	25.3411	29.2453	8.3799	37.8117	22.1043	15.8491	19.279	18.17	14.3472	14.2726	29.6846	8.658	29.5238	9.3823	55.6845	19.9452	42.333	14.3396	51.806	6.555	26.9231
ALS2CR4	89.0643	195.108	232.684	86.377	188.596	105.967	245.272	254.741	234.574	165.021	173.696	58.4416	199.887	213.542	342.624	85.5832	117.986	126.978	263.2	86.6774	121.451	165.517	135.417	371.05	227.027	40.9924	188.909	383.057	206.628	234.906	181.564	254.224	236.958	193.208	237.774	270.603	182.209	265.827	257.885	241.558	188.571	279.906	89.3271	178.509	79.9624	203.019	170.22	93.2265	78.8462
ALS2CR8	546.787	561.31	636.364	1215.68	1330.41	494.856	734.288	885.588	770.355	624.724	841.285	612.987	776.893	268.75	628.824	200.133	568.345	820.793	799.2	100.589	694.795	793.793	1012.73	762.487	659.46	609.493	1209.48	967.289	735.867	580.189	515.829	867.257	1174.18	1075.47	1141.74	760.545	834.29	563.767	682.127	971.429	500	713.839	483.759	636.25	581.374	1017.36	716.537	256.373	442.308
ALX3	14.6561	25.0138	37.8788	34.1242	8.7719	8.2305	22.9226	44.8799	14.9584	37.7192	80.7072	32.4675	13.9921	11.4583	13.5962	15.8	18.705	30.7071	57.6	12.306	16.5615	17.931	16.4436	14.2712	13.5135	11.8662	17.2448	25.7209	19.4932	30.1887	19.5531	24.1352	29.1777	15.8491	19.279	18.17	20.8034	16.9487	14.2239	22.5108	19.0476	18.7647	19.7216	25.9287	9.4073	8.3019	32.2946	37.1449	23.0769
AMAC1L2	7.8918	14.0077	28.1385	21.3276	7.3099	12.3457	20.6304	13.2743	8.1591	4.7149	14.9133	14.2857	1.3326	32.2917	10.877	21.0666	3.5971	16.5984	21.6	3.7453	7.0978	6.2069	6.7709	11.213	1.8018	1.0787	9.4062	11.0232	23.3918	27.3585	3.7244	24.9397	20.336	16.6038	49.2685	7.7872	10.7604	8.9204	7.4212	7.7922	17.1429	12.5098	20.8817	0.9973	9.4073	3.0189	4.7096	11.6533	13.4615
AMAC1L3	31.5671	18.01	50.8658	17.0621	16.0819	8.2305	24.4508	22.756	19.0379	7.0723	24.5631	10.3896	15.3246	2.0833	10.877	18.4333	5.7554	9.1291	18.4	0	20.5047	10.3448	24.1817	9.1743	17.1171	16.1812	16.4609	24.8023	18.5185	7.5472	12.1043	10.4586	24.7569	7.5472	24.6342	10.3829	20.0861	27.6531	4.329	25.974	17.1429	7.8186	19.7216	22.9369	15.9925	21.8868	8.0737	5.0983	10.5769
AMACR	182.638	223.123	213.203	166.356	269.006	336.42	306.399	182.68	188.339	209.813	237.736	120.779	155.245	404.167	226.377	230.416	202.158	223.249	250.4	85.6073	302.05	281.379	283.409	243.629	164.865	223.301	276.7	338.964	401.56	225.472	303.538	316.171	368.7	281.509	340.595	156.392	279.053	280.1	263.451	250.216	268.571	199.375	205.336	151.583	183.443	264.151	175.602	172.615	198.077
AMBRA1	1200.68	1281.71	1436.15	1041.86	874.269	585.391	1259.22	1138.43	886.622	1178.13	1307.11	577.922	884.832	625	1229.78	753.132	656.835	648.999	1356.8	1352.06	927.445	973.793	1148.15	953.109	1251.35	1834.95	910.837	1210.72	872.32	1289.62	1154.56	1259.05	1346.6	952.453	1133.17	774.822	992.826	1057.06	925.17	1110.82	1419.05	642.69	1054.52	1038.15	1105.36	1187.92	1492.95	1707.94	807.692
AMD1	2586.61	2632.4	5574.06	2277.79	5593.57	2346.71	4470.68	3270.06	2728.15	3130.69	4001.68	6132.47	6898.76	4194.82	5469.75	5021.76	2348.92	3142.08	3240	3355.51	3893.16	3283.19	4190.2	6131.5	5031.53	1559.87	4546.35	5928.66	9683.24	4560.38	4034.56	4797.51	3830.36	3724.53	4155.69	3759.9	3435.67	3481.16	3139.83	5787.01	4277.14	6219.09	2962.27	4504.61	2401.7	7520	4900.71	1704.5	2677.88
AMDHD1	323.563	16.0088	11.9048	17.0621	5.848	42.1811	12.2254	6.3211	14.2784	3.5362	11.4043	27.2727	5.3303	9.375	6.7981	10.5333	56.8345	26.5575	32.8	24.077	37.0662	26.8966	3.8691	11.213	3.6036	10.7875	3.9193	19.2907	7.7973	4.717	2.7933	20.1126	31.8302	0.7547	22.4921	9.085	12.9125	7.1363	21.0266	1.7316	40.9524	4.6912	5.8005	13.9616	40.4516	1.5094	11.4377	5.8267	17.3077
AMDHD2	125.141	96.0531	114.913	135.431	13.1287	83.3333	91.9427	88.5841	209.798	212.931	133.07	68.8312	156.904	102.083	150.993	102.7	181.691	101.707	84	299.203	135.647	138.952	26.8514	26.5443	158.928	141.316	25.0833	79.9184	38.0117	47.1698	160.903	146.428	129.072	99.7208	70.6895	118.365	67.9268	29.4372	138.429	26.8398	170.914	72.7131	47.5638	125.056	164.149	163.253	133.343	230.153	36.9231
AMFR	1852.31	1127.62	1260.82	1194.35	549.708	1721.19	1165.23	1672.57	1170.15	1413.88	1454.48	1759.74	1448.51	1112.5	1619.31	1946.03	1651.08	1265.63	1698.4	2547.35	1350.16	1286.21	1069.8	1140.67	1303.6	1845.74	1944.74	1105.08	1147.17	1296.23	1839.85	1493.16	1197.17	1152.45	1339.89	1221.93	1106.89	1380.87	1346.32	1310.82	1867.62	1326.04	1533.64	2155.07	1349.01	1116.23	1547.45	1839.77	1326.92
AMH	60.8794	38.021	96.3203	18.1285	20.4678	9.2593	25.979	12.0101	10.8788	104.906	6.1408	53.2468	5.3303	2.0833	188.307	28.9666	41.7266	11.6189	24	9.6308	18.1388	8.9655	13.5417	16.3099	33.3333	8.63	14.8932	14.6976	20.4678	29.2453	37.2439	18.5036	7.9576	6.7925	13.9237	49.9676	31.5638	11.5965	15.4607	9.5238	39.0476	35.1837	22.0418	24.9314	35.7479	52.8302	10.0921	221.413	9.6154
AMICA1	57.4972	82.0453	60.6061	46.9208	119.883	52.4691	56.5425	30.3413	90.4301	693.679	303.529	19.4805	21.9875	1462.5	123.046	427.916	40.2878	280.514	80.8	1529.69	175.079	208.965	42.5598	49.949	145.946	21.575	53.302	175.453	44.8343	55.6604	34.4507	351.569	331.565	1906.42	321.316	2404.28	919.656	150.754	1526.9	229.437	264.762	219.703	1284.22	73.7971	500.47	198.491	573.23	71.3765	5544.23
AMIGO1	155.581	202.112	53.0303	162.09	10.2339	121.399	11.4613	38.5588	165.222	58.9362	269.317	2.5974	59.2997	17.7083	20.3943	15.8	92.8058	154.365	347.2	4.2804	86.7508	50.3448	14.509	22.4261	44.1441	71.1974	90.9269	42.2557	17.5439	11.3208	169.46	41.0298	16.7993	42.2642	36.4158	29.2018	30.8465	49.062	8.0396	79.6537	418.095	14.0735	25.522	220.394	111.007	1.5094	308.145	33.5033	20.1923
AMIGO2	20.2931	277.153	18.3983	17.0621	10.2339	48.3539	15.2818	30.3413	34.6762	27.7	89.4798	18.1818	101.276	9.375	12.2366	22.3833	22.3022	103.74	102.4	27.2873	37.8549	84.1379	55.1343	27.5229	29.7297	18.3387	18.0286	12.8604	33.1384	36.7925	49.3482	65.9694	5.305	26.4151	6.4263	134.977	26.5423	4.4602	1.8553	10.3896	36.1905	63.3307	13.9211	240.339	147.695	28.6792	168.874	30.5899	13.4615
AMIGO3	714.769	1030.57	622.294	507.598	388.889	241.769	401.91	242.099	279.449	1652.57	281.598	181.818	318.486	169.792	822.57	596.449	762.59	606.673	936.8	599.251	275.237	355.862	436.238	205.912	227.027	596.548	231.237	288.441	252.437	367.925	1336.13	303.298	275.862	244.528	335.24	622.972	820.66	319.349	521.336	271.861	1085.71	299.453	261.021	1030.17	577.611	429.434	600.815	407.866	220.192
AMMECR1	195.04	163.09	559.524	458.544	739.766	383.745	550.143	316.688	363.08	682.481	642.149	720.779	252.524	397.917	756.628	335.749	176.978	279.684	306.4	237.56	342.271	346.207	501.045	1836.9	3135.14	277.238	431.119	391.325	541.91	395.283	204.842	438.455	226.348	332.075	353.448	340.688	317.791	199.816	241.806	790.476	409.524	421.423	1452.44	205.435	252.117	313.207	795.255	316.096	256.731
AMMECR1L	873.732	698.386	1058.44	693.149	793.86	792.181	725.119	860.303	829.509	638.868	698.293	966.234	811.54	511.458	852.481	913.765	681.295	946.941	769.6	390.048	755.52	731.034	856.032	677.88	627.928	860.841	772.095	905.742	902.534	816.981	881.75	805.31	749.779	680	760.448	813.108	730.273	708.277	636.982	800	906.667	753.714	609.049	940.414	692.38	531.321	670.114	702.112	596.154
AMN	130.778	258.143	93.0736	94.908	0	54.5267	188.73	149.178	135.985	184.47	123.693	129.87	49.9717	375	0	84.2665	197.842	155.195	224.8	366.506	93.0599	177.241	24.1817	22.4261	69.3694	149.946	18.8125	234.244	15.5945	98.1132	148.976	193.081	123.784	303.396	81.4001	33.0954	126.973	23.193	307.978	46.7532	152.381	138.389	16.2413	237.347	103.481	73.9623	5.3824	400.583	64.4231
AMN1	71.0259	101.056	212.121	194.082	125.731	96.7078	129.131	184.577	97.2293	90.7618	144.747	366.234	49.9717	64.5833	110.129	109.283	64.7482	106.23	100.8	35.313	165.615	97.2414	195.388	174.312	105.405	128.371	338.624	168.104	256.335	107.547	96.8343	165.728	175.066	131.321	166.013	129.786	109.039	117.749	97.7118	146.32	120.952	301.016	67.2854	92.745	79.9624	190.943	203.86	87.3999	119.231
AMOT	31.5671	92.0509	76.8398	37.3234	83.3333	31.893	85.5778	110.62	301.887	70.7234	171.941	50.6494	484.392	41.6667	114.208	35.5499	16.5468	43.1559	209.6	21.4018	136.435	166.207	11.6072	68.2977	38.7387	134.844	446.012	119.418	390.838	41.5094	46.5549	95.7361	308.577	72.4528	139.237	61.6483	83.9311	64.2266	112.554	197.403	87.619	64.8944	44.0835	98.7285	22.5776	760	574.575	89.5849	15.3846
AMOTL1	30.4397	149.082	834.416	84.2442	782.164	29.8354	763.324	938.053	358.321	574.039	352.656	228.571	1533.13	2.0833	1147.52	470.049	52.518	64.7339	460.8	230.605	683.754	770.345	150.894	1250.76	389.189	148.867	409.955	959.021	1002.92	850.943	355.68	759.453	509.284	0.7547	13.9237	739.779	523.673	530.762	296.846	548.918	261.905	880.375	25.522	202.443	69.6143	25.6604	183.003	903.132	11.5385
AMOTL2	23.6753	7.0039	9.7403	22.394	0	29.8354	5.3486	10.1138	0.6799	48.3277	7.018	10.3896	14.6584	3.125	40.1088	1.3167	2.8777	17.4284	2.4	1.0701	19.7161	2.069	13.5417	23.4455	9.9099	22.6537	3.1354	8.2674	3.8986	11.3208	74.4879	1.609	15.9151	3.0189	4.2842	17.5211	8.6083	7.1363	6.1843	6.0606	82.8571	3.9093	25.522	21.9397	1.8815	35.4717	28.9306	12.3816	0
AMPD1	4.5096	3.0017	27.0563	30.9251	1.462	9.2593	8.405	5.0569	1.3599	2.9468	4.3863	0	0	0	4.7587	2.6333	0	15.7685	2.4	0	11.041	1.3793	0.9673	15.2905	8.1081	0	1.5677	11.0232	0	0	39.1061	5.6315	0	3.0189	5.3553	27.255	7.1736	7.1363	3.7106	2.5974	28.5714	64.8944	67.2854	13.9616	0	0.7547	44.4051	6.555	0
AMPD2	2656.14	3530.95	3247.84	2041.06	1441.52	1242.8	2344.99	3161.19	2297.47	3804.92	2492.27	1664.94	2186.09	1701.04	2286.2	3890.74	3148.92	2762.81	3664.8	3920.28	2682.97	2485.52	2153.14	1298.67	1632.43	3751.89	2059.96	2230.37	1259.26	2153.77	3177.84	2573.61	2923.08	2552.45	1965.38	2088.25	2189.38	2087.37	2359.93	1637.23	2712.38	2089.91	1234.34	5004.24	2302.92	2808.3	2531.76	6316.1	1927.88
AMPD3	1935.74	976.539	740.26	2118.9	2026.32	1910.49	1268.39	837.547	428.353	1646.68	1150.96	785.714	309.158	885.417	1486.06	526.666	734.532	1693.87	1025.6	508.293	782.334	366.207	1889.07	1221.2	967.568	517.799	501.666	1654.4	648.148	569.811	1085.66	944.489	1335.99	849.057	998.222	1391.3	1614.06	464.751	857.761	1082.25	1598.1	407.349	1023.2	1775.12	540.922	614.34	2103.19	1075.02	827.885
AMPH	27.0575	76.042	41.1255	38.3898	21.9298	12.3457	74.8806	22.1239	13.5985	20.0383	104.393	16.8831	17.9898	83.3333	10.877	9.2167	53.2374	59.7544	63.2	20.3317	41.0095	31.7241	33.8544	91.7431	100.901	2.1575	51.7343	275.581	234.893	48.1132	27.0019	160.901	129.974	95.8491	117.816	49.3186	90.3874	21.4089	69.2641	19.9134	77.1429	65.6763	45.2436	54.8492	115.71	11.3208	18.1657	14.5666	0
AMT	303.506	204.143	653.853	490.355	232.456	442.058	588.798	651.789	457.365	250.921	534.545	323.429	233.987	92.9062	153.603	255.762	280.892	424.314	295.272	717.769	303.975	263.641	183.017	321.101	541.928	227.875	312.381	591.81	129.63	314.151	392.086	300.845	487.365	516.611	304.308	193.667	256.822	136.946	326.32	201.532	163.609	301.22	147.332	424.114	366.331	168.974	451.694	274.734	314.423
AMY1A	7.8918	3.0017	3.2468	5.3319	4.386	4.1152	0	7.5853	4.0796	1.1787	4.3863	5.1948	3.9977	1.0417	2.7192	6.5833	0.7194	14.1087	4.8	2.6752	3.1546	4.8276	0.9673	7.1356	4.5045	0	4.7031	3.6744	8.7719	2.8302	10.2421	4.0225	4.4209	3.0189	3.2132	5.8404	7.1736	6.2443	1.8553	2.5974	1.9048	4.6912	5.8005	4.9863	1.8815	15.0943	6.0552	0.7283	11.5385
AMY2B	563.844	426.376	429.924	329.907	558.991	899.269	110.8	864.564	321.285	329.253	533.37	106.299	368.638	130.208	352.067	613.513	326.604	1152.96	382.872	550.027	382.011	305.476	370.377	152.65	382.207	43.3873	834.082	537.52	321.598	447.962	348.371	312.55	673.333	405.079	441.949	586.905	489.448	464.849	413.364	370.078	382.705	583.237	135.603	486.801	199.266	1027.1	566.085	203.627	310.279
AMZ1	64.2616	34.0188	142.857	36.257	1.462	14.4033	25.979	32.8698	6.1193	2.9468	39.4764	59.7403	82.6198	3.125	8.1577	22.3833	0.7194	15.7685	20	5.3505	7.8864	6.8966	3.8691	20.3874	17.1171	15.1025	23.5156	22.0465	43.8596	26.4151	25.1397	37.0072	92.8382	16.6038	64.2632	5.8404	2.8694	1.7841	23.5003	54.5455	38.0952	12.5098	33.6427	24.9314	12.2295	30.1887	54.4972	13.8383	16.3462
AMZ2	754.228	708.391	484.849	379.632	507.31	833.333	450.812	499.368	492.266	485.634	678.116	523.377	617.65	416.667	651.258	572.749	584.892	1125.37	683.2	532.37	732.65	360	429.467	580.02	626.126	444.444	531.452	581.476	881.092	507.547	846.369	497.989	445.623	515.472	698.327	580.792	639.168	285.452	400.742	578.355	765.714	801.407	470.998	649.215	381.938	651.321	875.319	774.217	358.654
AMZ2P1	207.441	162.09	188.312	286.857	239.766	356.996	120.726	210.493	267.211	167.968	156.151	233.766	186.561	197.917	250.17	176.433	148.201	343.588	123.2	262.707	179.022	117.931	139.286	87.6656	113.513	75.5124	308.054	261.802	248.538	177.358	239.292	230.089	223.696	203.774	225.992	256.327	218.077	129.345	141.002	193.074	165.714	297.889	129.93	132.635	96.8956	188.679	271.14	193.008	56.7308
ANAPC1	1191.66	1235.68	1573.59	1446.01	2744.15	755.144	2636.87	2048.67	2177.8	1642.55	2274.72	512.987	2262.05	858.333	2237.93	736.015	669.784	1009.19	2008.8	513.644	1899.84	2428.28	2482.01	2485.22	2558.56	975.189	2333.53	2573.92	1366.47	1473.58	1452.51	2028.96	2037.14	2591.7	2473.06	2084.36	1738.16	2260.42	2100.19	2246.75	1854.29	1168.1	1442	1959.61	795.861	2116.23	2091.08	1739.26	678.846
ANAPC10	81.1725	107.059	68.1818	98.1072	108.187	120.37	87.8701	96.0809	88.3903	45.9702	76.321	364.935	77.2895	184.375	60.5031	46.0833	62.5899	146.066	80.8	107.544	97.0032	78.6207	128.647	111.111	131.531	104.639	92.4946	100.128	112.086	77.3585	90.3166	65.9694	56.5871	120	111.39	115.509	85.3659	103.476	98.9487	117.749	81.9048	190.774	100.928	47.8684	66.7921	99.6226	75.3541	39.3299	48.0769
ANAPC11	563.698	557.308	377.706	365.769	175.439	288.066	385.864	340.076	316.845	512.745	248.262	694.805	323.15	437.5	462.95	816.332	519.424	306.241	408.8	734.617	414.827	389.655	87.0541	288.481	245.045	367.853	199.099	257.209	202.729	296.226	480.447	353.982	204.244	333.585	177.795	547.696	472.74	286.344	510.204	205.195	431.429	580.923	219.257	500.623	466.604	259.623	228.081	472.688	313.462
ANAPC13	1020.55	1281.73	716.829	627.587	953.567	1656.85	845.066	956.612	864.586	755.892	557.915	1291.26	765.44	1507.97	696.818	688.036	932.899	1256.62	887.112	563.836	1050.34	671.103	935.503	1128.92	914.937	465.728	966.161	902.123	1361.1	1216.38	1124.8	869.067	754.66	972.634	713.964	1258.43	854.275	918.405	749.27	1082.19	744.952	1384.89	957.053	835.462	621.035	817.713	825.303	417.291	761.885
ANAPC16	895.152	856.473	964.286	863.77	1195.91	1326.13	969.628	1061.31	878.463	759.688	1223.77	2635.06	673.618	1633.33	991.842	1753.8	638.13	1215.01	737.6	1006.96	1253.94	762.069	1327.09	1356.78	1234.23	842.503	1277.68	1098.65	1691.03	1186.79	730.913	1152.86	954.023	1253.58	1365.59	1197.92	1116.21	831.378	907.854	1290.04	742.857	1721.66	1145.01	760.908	649.106	1334.34	1408.85	1212.67	1342.31
ANAPC2	1432.92	1472.81	1173.16	1661.42	536.55	914.609	1114.8	1323.01	956.655	1866.51	1214.99	358.442	782.223	580.208	1146.84	1019.1	1549.64	1103.8	1368.8	2001.61	902.997	1076.55	675.153	680.938	1055.86	648.328	801.097	1072.93	609.162	1008.49	1163.87	1044.25	1050.4	975.849	940.385	1100.58	1253.23	700.249	1220.16	677.056	1279.05	970.289	699.536	1348.29	1404.52	868.679	918.379	2183.54	560.577
ANAPC4	1005.64	857.474	1069.26	1448.15	988.304	1371.4	930.659	1112.52	969.573	592.898	969.364	558.442	832.195	602.083	670.292	699.149	928.777	1459.83	774.4	667.202	887.224	866.897	526.194	618.756	766.667	225.458	1019.79	1230.01	936.647	1126.42	928.305	857.603	961.096	1209.06	1142.81	1033.1	827.834	788.561	1016.08	832.035	800.952	1133.7	590.487	797.806	953.904	876.981	1018.63	420.248	397.115
ANAPC5	4496.05	5162.85	3817.1	4276.19	3602.34	4057.61	4075.64	3986.09	3789.9	4014.14	3642.35	1007.79	3352.77	2961.46	3819.17	3889.43	3833.09	4556.27	4783.2	4298.56	3702.68	4143.45	2389.15	3106.01	3306.31	1987.06	3266.31	4242.11	2846.98	4017.92	4113.59	3871.28	4150.31	4024.15	3740.12	4210.9	4346.48	2889.31	4205.32	3173.16	3938.1	3396.4	2366.59	4814.76	3695.2	2766.04	3555.77	3532.41	1865.38
ANAPC7	1567.08	1880.04	1412.34	1591.04	1412.28	1779.84	1479.27	1700.38	1913.99	1052.6	1564.14	1194.81	1456.51	1584.38	1197.14	1042.8	1627.34	2058.21	1307.2	876.404	1731.86	1601.38	1629.85	1589.19	1756.76	871.629	1289.44	1679.21	1423.98	1795.28	1581.01	1539.02	1662.25	1670.94	1590.51	1369.89	1307.03	1149.84	1300.56	1503.9	1343.81	1980.45	1129.93	1353.28	1345.25	916.226	1503.05	1204.66	900.962
ANG	11.195	9.005	7.5758	31.3196	0	19.5473	5.7689	9.4817	0	4.1255	6.2022	20.7792	1.9989	0	3.399	5.2667	30.036	19.9181	22.36	6.9556	7.2634	1.3793	4.7783	4.0775	1.8018	3.603	12.5652	4.0786	5.848	4.717	30.419	5.6315	2.6525	0	8.5684	31.4017	6.8436	8.0283	2.4737	0	29.4476	29.1634	5.4292	10.5909	8.4666	3.7736	18.2599	21.1216	36.5385
ANGEL1	554.679	619.342	566.017	572.647	542.398	453.704	1145.37	827.434	987.931	857.522	1288.68	919.481	1088.05	1146.88	932.019	575.382	454.676	570.156	1063.2	477.796	835.962	1071.72	831.85	919.47	1468.47	1769.15	666.275	1148.25	1054.58	888.679	532.588	1144.81	1526.97	1058.11	1045.35	778.066	836.442	677.948	1119.36	1152.38	647.619	867.865	729.698	572.426	316.087	877.736	828.223	1606.7	530.769
ANGEL2	799.324	738.408	1080.09	1201.81	1576.02	1013.37	1020.06	994.943	748.598	587.005	1040.42	1129.87	834.194	770.833	764.106	484.533	687.05	1198.41	920.8	359.015	839.905	714.483	1210.05	908.257	1124.32	613.808	1320.01	1265.83	1038.99	939.623	814.711	1095.74	1132.63	960	1523.04	983.128	825.682	814.43	952.381	1150.65	933.333	940.579	964.037	782.847	712.135	969.811	1180.1	625.637	766.346
ANGPT1	34.9493	211.117	2129.87	35.1906	3542.4	66.8724	1519.77	230.721	380.758	333.579	4185.37	1809.09	6376.39	3737.5	1610.47	843.982	120.863	117.019	59.2	415.195	55.9937	279.31	4903.08	120.285	2325.23	398.058	4480.5	2114.62	3303.12	127.359	207.635	1421.56	2964.63	2988.68	202.429	1184.3	483.501	3053.44	4659.25	9240.69	328.571	1449.57	1296.98	228.372	18.8147	5852.08	2885.66	2823.02	2061.54
ANGPT2	104.848	124.069	172.078	294.322	1081.87	111.111	176.504	47.4083	74.7918	127.892	204.4	161.039	73.9581	76.0417	112.848	55.2999	41.0072	90.4615	163.2	4.2804	73.3438	68.9655	200.224	161.06	239.64	120.82	112.091	512.58	576.998	176.415	69.8324	386.967	514.589	99.6226	330.956	140.818	56.6714	119.533	87.1985	402.597	69.5238	67.24	252.9	58.8382	92.1919	160	113.031	120.175	94.2308
ANGPTL1	186.02	41.0227	267.316	228.206	304.094	30.8642	70.2961	51.201	26.5171	5.3043	95.6205	159.74	25.319	8.3333	15.6356	10.5333	14.3885	71.3733	92	3.2103	29.1798	29.6552	24.1817	218.145	133.333	7.5512	65.0598	182.802	131.579	103.774	86.5922	69.992	52.1662	70.1887	156.374	40.8825	23.6729	89.2037	25.974	110.823	46.6667	104.769	143.851	114.685	79.0216	13.5849	24.8938	69.9199	39.4231
ANGPTL2	20.2931	9.005	30.303	41.5889	30.7018	28.8066	7.6409	5.0569	2.7197	15.9128	13.1588	5.1948	6.6629	4.1667	58.4636	2.6333	0.7194	5.8095	0.8	0.535	18.1388	2.069	0	27.5229	8.1081	5.3937	0.7839	22.9651	1.9493	3.7736	52.1415	1.609	4.4209	4.5283	6.4263	14.9254	6.4562	3.5681	4.9474	4.329	85.7143	3.1274	29.0023	16.9534	8.4666	0.7547	34.313	3.6417	0
ANGPTL3	4.5096	4.0022	20.5628	33.0579	4.386	4.1152	9.1691	6.9532	2.0398	2.9468	5.2635	74.026	9.9943	0	6.1183	3.95	0	1.6598	8	0	2.3659	6.2069	12.5745	4.0775	17.1171	32.3625	12.5416	21.1279	3.8986	6.6038	9.311	3.218	9.7259	6.0377	21.4211	0.6489	2.1521	9.8124	12.3686	12.1212	4.7619	7.0367	11.6009	1.9945	5.6444	15.0943	6.0552	11.6533	0
ANGPTL4	74.4081	11.0061	37.8788	22.394	7.3099	7.2016	11.4613	23.3881	17.6781	18.2702	14.036	23.3766	9.328	4.1667	38.0693	40.8166	5.036	13.2788	25.6	5.3505	22.082	11.7241	14.509	30.581	11.7117	11.8662	14.1093	14.6976	21.4425	11.3208	43.7616	12.8721	8.8417	4.5283	18.2079	12.9786	12.1951	12.4885	13.6054	8.658	62.8571	8.6005	24.3619	23.9342	14.111	19.6226	52.4788	9.4683	0
ANGPTL6	120.609	93.1515	13.5498	77.3234	79.386	89.2284	219.469	39.646	319.803	219.366	169.976	8.4935	99.2837	175.5	177.233	12.9955	135.223	129.958	104.688	216.479	114.385	180.834	72.6902	142.498	81.6577	237.023	78.3853	101.956	3.46	2.3774	180.456	104.143	281.362	147.358	94.574	200.337	85.8465	17.9656	84.329	181.87	127.733	5.9343	19.478	104.473	39.031	302.928	206.753	643.489	31.3462
ANGPTL7	55.2424	18.01	81.1688	51.1864	121.345	9.2593	17.574	19.5954	24.4773	4.1255	42.1081	5.1948	19.9887	10.4167	25.8328	9.2167	1.4388	13.2788	26.4	3.7453	21.2934	19.3103	43.527	41.7941	50.4505	32.3625	35.2734	39.4999	41.9103	28.3019	26.0708	32.9847	30.9461	16.6038	50.3395	15.5743	17.2166	25.8691	16.6976	50.2165	24.7619	15.6372	39.4432	38.893	50.7996	35.4717	18.1657	36.4166	12.5
ANK1	143.179	187.103	495.671	886.164	81.8713	243.827	1583.95	492.415	39.4357	7263.3	1708.01	246.753	6.6629	300	4694.77	172.483	1499.28	719.542	943.2	56.1798	77.2871	113.793	172.174	8203.87	10606.3	29.1262	209.289	122.174	4.8733	20.7547	259.776	2794.85	119.363	118.491	183.15	922.777	592.539	31.2213	19.1713	1169.7	2590.48	162.627	3567.29	370.98	238.946	23.3962	3037.04	389.658	46.1538
ANK2	10.1466	2.0011	3.2468	15.9957	17.5439	17.4897	1.5282	1.8963	0	3.5362	4.3863	2.5974	0	0	21.0741	0	0	6.6394	1.6	0.535	6.3091	0	0	14.2712	4.5045	0	3.9193	13.779	0	0	40.9683	1.609	0.8842	0.7547	1.0711	3.2446	3.5868	33.8974	1.2369	0.8658	26.6667	3.1274	33.6427	14.9589	0.9407	0	23.5482	21.1216	0
ANK3	22.5479	32.0177	49.7835	34.1242	59.9415	11.3169	423.305	221.871	36.036	8.2511	300.02	36.3636	1.9989	46.875	11.5568	194.866	10.7914	111.21	49.6	16.0514	76.4984	64.8276	65.7742	128.44	679.279	21.575	13.3255	1392.6	640.351	666.038	27.933	754.626	296.198	338.113	758.306	18.8189	9.3257	7.1363	95.8565	23.3766	33.3333	602.815	150.812	45.8738	83.7253	0.7547	223.371	41.5149	76.9231
ANKAR	216.46	120.066	212.121	249.534	299.708	89.5062	129.895	165.613	141.424	48.917	241.244	89.6104	99.9434	77.0833	109.449	65.8332	60.4317	168.474	160.8	49.2242	96.2145	129.655	193.453	268.094	266.667	97.0874	398.197	294.871	163.743	97.1698	110.801	234.916	290.893	188.679	261.337	135.626	107.604	105.26	86.5801	196.537	139.048	123.534	161.253	150.586	137.347	153.962	161.473	73.5615	104.808
ANKDD1A	226.607	197.109	221.862	608.904	314.327	312.757	170.392	242.099	239.334	99.0128	182.469	81.8182	198.554	165.625	228.416	146.15	121.583	209.97	158.4	327.448	245.268	158.621	500.077	350.663	229.73	155.34	319.812	294.871	307.017	263.207	154.562	290.426	302.387	175.849	334.169	214.796	236.729	236.39	188.621	295.238	214.286	189.992	419.954	133.632	306.679	216.604	245.574	156.591	424.038
ANKFY1	4287.49	4008.21	2515.15	5844.84	2453.22	4147.12	2375.55	2640.96	3130.38	2283.19	2676.5	575.325	2211.41	932.292	2187.63	1192.9	6782.73	5973.78	10092	1075.44	3732.65	2928.97	2343.69	2063.2	2434.23	1583.6	1747.99	2359.89	2096.49	2393.4	9461.83	2236.52	2035.37	2322.26	2187.09	2142.12	1992.11	2082.91	2504.02	1825.97	8084.76	2319	2537.12	5823.98	4446.85	1888.3	1886.54	1835.4	2088.46
ANKH	1381.06	1320.73	676.407	1735	880.117	962.963	563.897	529.709	586.775	759.098	1034.28	119.481	1397.87	147.917	1353.5	237	942.446	1164.38	1049.6	74.3713	526.814	526.897	660.644	1110.09	1026.13	242.718	790.124	572.289	628.655	521.698	1119.18	565.567	492.485	388.679	546.237	697.599	603.3	507.569	249.227	439.827	1653.33	404.222	705.336	1282.47	1903.1	790.189	1572.35	805.535	493.269
ANKHD1	6410.48	6697.02	6857.06	10422.9	8745.83	8699.6	7077.84	5241.61	5071.13	3477.61	6425.26	2607.62	5906.79	9091.33	5406.26	8728.34	4386.13	7025.14	5231.21	3388.43	5514.49	5139.63	7491.99	8368.09	5943.63	2181.66	5172.68	7647.01	7797.41	7775.03	7093.54	7142.24	5641.99	5943.06	7403.39	5610.73	6748.74	8160.91	5267.88	6793.52	7765.1	5222.52	6942.76	6150.68	6536.2	4386.63	3794.06	1504.54	5598.05
ANKHD1-EIF4EBP3	1553.46	1895.88	2002.85	1021.76	950.965	1681.48	1376.92	2138.65	1969.95	1892.82	2019.49	268.104	792.311	2888.26	1882.01	1670.35	1045.21	1461.56	3233.14	581.268	2450.8	3007.72	1361.72	915.882	1840.59	500.885	2054.09	1174.53	1716.9	1493.98	1267.4	1260.39	1668.7	1514.63	1579.02	1568	1054.65	1528.42	530.55	891.628	1249.75	1443.26	1414.22	1367.03	2041.55	958.891	716.463	411.202	114.087
ANKIB1	1130.78	779.431	1589.83	1266.86	2162.28	1242.8	1466.28	1413.4	1812.68	1186.98	1491.33	858.442	1561.78	844.792	1487.42	714.949	966.907	1315.43	1054.4	454.254	1304.42	1478.62	2729.63	1514.78	1482.88	669.903	1940.82	1695.74	1756.34	1344.34	1229.98	1452.94	1510.17	1589.43	1598.01	1494.48	1317.07	818.89	1076.07	1622.51	1544.76	1193.9	1161.25	1197.71	1394.17	840.755	1402.8	454.479	1226.92
ANKLE1	283.157	271.56	631.883	393.303	86.2573	216.049	441.643	733.881	1122.38	1683.11	490.919	410.195	405.697	639.583	1088.43	552.657	161.597	285.111	234.44	266.699	817.145	1055.02	52.2325	422.018	734.234	660.097	755.172	863.514	350.594	399.057	179.451	641.673	449.16	720.86	431.442	702.933	706.133	517.158	1141.03	311.688	412.343	826.075	585.847	199.99	133.264	247.109	689.706	2030.55	254.808
ANKLE2	3534.39	3216.78	2809.52	4471.34	3704.68	2713.99	2166.95	2800.89	4042.84	3522.03	2192.25	1100	3089.58	2063.54	3237.93	2553.01	3400.72	3874.91	3673.6	2717.5	3547.32	3591.72	3891.32	2392.46	2057.66	2777.78	2462.08	2162.39	2140.35	2266.04	4327.75	2047.47	2122.9	2220.38	2705.48	2565.87	2899.57	2670.76	2722.94	2969.7	3333.33	2515.25	1747.1	3983.05	3380.06	3374.34	2342.71	3209.03	2145.19
ANKMY1	631.342	658.364	1143.94	998.134	988.304	511.317	799.236	1352.79	543.26	1088.55	1195.7	398.701	916.148	429.167	912.073	789.999	408.633	491.314	661.312	737.293	542.587	672.414	769.945	666.667	722.523	291.262	797.962	1025.16	692.982	1000	445.68	1020.11	956.676	833.207	886.832	830.63	1147.53	830.192	922.078	664.069	469.524	921.814	790.023	491.648	496.707	776.362	642.529	1539.69	434.615
ANKMY2	643.743	611.338	714.286	599.307	682.749	673.868	586.819	750.316	739.079	459.113	691.275	241.558	661.625	570.833	669.612	580.649	417.986	731.161	614.4	557.517	572.555	597.241	684.826	533.13	825.225	302.05	1044.88	620.057	706.628	883.019	615.456	678.198	734.748	825.66	775.443	737.184	767.575	464.751	528.757	834.632	674.286	686.474	577.726	593.368	365.005	400.755	786.509	132.556	525
ANKRA2	378.805	372.206	309.524	476.673	369.883	446.502	302.579	430.468	313.445	288.787	371.955	397.403	275.844	292.708	343.984	229.1	335.971	687.175	394.4	178.705	371.451	263.448	390.776	269.113	305.405	214.671	464.041	430.825	534.113	316.038	431.099	331.456	322.723	335.094	402.716	385.464	322.812	353.247	313.544	406.926	431.429	449.57	258.701	291.199	264.346	420.377	254.993	143.481	199.038
ANKRD10	2146.63	1931.51	2814.1	3311.72	2977.3	2601.14	2030.07	2909.01	2569.82	2351.35	2208.9	2883.86	1974.93	1435.42	2414.64	2571.64	1335.89	3202.91	1590.98	4541.09	2497.48	1781.71	2062.7	1519.2	1452.94	928.457	2759.03	2614.66	3019.96	3526.24	1904.58	1877.19	2480.69	2146.63	2190.53	3517.96	2286.61	1801.24	2190.7	1780.19	1641.32	3826.63	1167.08	1823.65	1722.75	2168.2	1603.28	2512.91	1496.97
ANKRD11	8462.82	7724.02	8981.14	13476.3	5388.95	6838.2	6142.21	6087.29	5141.04	5442.63	7331.36	3049.56	4850.61	5191.8	5206.04	7725.53	5254.22	6049.72	5936.66	4691.05	6108.47	4822.75	5379.36	6811.87	6255.95	3934.57	6952.34	7132.96	6076.29	6083.18	6527.15	6200.9	5665.93	4858.96	6042.84	5569.23	5881.01	6680.07	6091.45	5073.56	7043.7	5406.05	7326.96	7543.12	8324.83	4861.47	4637.98	3871.55	5960.85
ANKRD12	3317.93	1965.09	2845.24	4492.67	5520.47	6275.72	3380.32	2356.51	3090.26	1029.03	3927.46	1519.48	2032.18	4907.29	2003.4	2437.15	1979.86	3746.27	2707.2	2044.41	2773.66	2848.97	3991.91	5382.26	8639.64	1432.58	2993.53	4010.62	4271.93	2934.91	2608.94	4511.67	4157.38	3969.81	4984.68	2718.36	2517.22	3369.22	2753.25	4479.65	3389.52	2320.56	5254.06	3178.26	4000	3336.6	3966.86	523.671	3222.12
ANKRD13A	1657.27	1729.96	2463.2	1841.64	1994.15	1620.37	2270.87	2333.12	2264.83	2194.19	2022.07	1285.71	2478.6	1328.12	2770.22	2934.84	2103.6	1674.78	1896.8	1664.53	2179.02	2028.97	2125.09	2035.68	1518.02	2028.05	2564.77	2115.54	2253.41	1977.36	1930.17	2112.63	2304.16	2120	2023.22	2175.21	2520.8	2246.15	2510.2	2432.9	1954.29	2515.25	2416.47	1980.55	2279.4	1969.81	2952.27	2677.35	2150.96
ANKRD13B	94.7012	234.129	309.524	178.086	30.7018	44.2387	335.435	537.295	452.83	482.098	326.338	283.117	642.303	156.25	284.84	351.549	257.554	111.21	469.6	574.104	384.858	322.759	27.0835	127.421	134.234	192.017	174.799	281.092	242.69	518.868	207.635	227.675	179.487	132.83	250.627	133.679	283.357	87.4196	228.819	86.5801	150.476	365.911	66.1253	195.463	113.829	209.057	24.221	550.619	23.0769
ANKRD13C	458.85	367.203	742.424	586.51	619.883	488.683	465.329	594.185	524.902	302.932	582.496	1096.1	600.993	371.875	440.517	447.666	385.611	546.089	432.8	637.239	473.186	500	689.662	518.858	732.432	434.736	801.881	592.499	564.327	559.434	477.654	589.702	572.944	523.774	615.856	501.622	377.331	572.688	398.887	716.883	606.667	624.707	611.369	555.472	509.878	621.132	734.03	462.491	546.154
ANKRD13D	5096.96	3517.94	2688.31	8928.82	1486.84	7638.89	1642.79	1828.07	2847.53	3012.23	1907.15	4129.87	2405.97	1183.33	1473.15	3823.59	7814.39	4069.94	3409.6	8543.61	2309.15	1692.41	893.755	779.817	1037.84	1815.53	1323.14	2150.45	1763.16	1666.98	2781.19	1325.02	1773.65	1558.49	1308.83	2320.57	2066.71	2146.24	2396.41	1219.05	4126.67	2399.53	3180.97	4969.33	6881.47	1975.09	2922.66	5979.61	2775
ANKRD16	237.881	338.187	310.454	154.625	141.813	174.897	262.067	377.37	229.815	186.757	391.86	337.662	184.562	321.875	238.613	262.016	112.95	221.589	259.2	98.9834	208.202	148.214	174.108	236.493	279.189	168.285	268.078	347.232	301.17	253.774	224.395	267.9	303.271	252.076	620.14	126.963	207.274	179.299	204.7	216.45	314.286	411.259	117.169	156.569	84.666	164.528	209.915	468.318	127.885
ANKRD17	4064.26	4564.52	4676.41	5210.34	8985.38	3984.57	6399.24	5053.1	6270.95	4141.45	6452.19	3240.26	5400.94	4703.12	5927.94	3000.68	2877.7	4103.13	4947.2	1161.05	5542.59	6121.38	6293.04	6957.19	6765.77	2864.08	5790.32	6399.9	4836.26	4433.96	5224.39	5704.75	6305.04	5898.11	6449.89	5296.56	5345.77	7203.2	4549.78	5737.66	5847.62	3296.33	4977.96	5170.78	3745.06	5953.96	5533.82	3806.99	3871.15
ANKRD19	41.7136	34.0188	20.5628	66.1157	29.2398	39.0947	31.3276	54.9937	23.7974	22.3958	46.4944	55.8442	20.655	48.9583	41.4684	42.1333	30.2158	111.21	52.8	85.6073	74.1325	37.931	27.0835	16.3099	41.4414	12.945	24.2994	52.3603	82.846	60.3774	24.2086	30.5712	50.3979	25.6604	51.4106	51.9143	61.693	45.4939	35.2505	19.0476	32.381	59.4214	40.6032	33.9068	33.8664	47.5472	28.9306	57.5382	28.8462
ANKRD20A3	9.0192	1.0006	31.3853	44.7881	470.76	17.4897	54.2502	81.5424	2.7197	15.9128	15.7905	24.6753	0	0	68.6608	13.1666	2.1583	9.1291	8	9.0958	3.9432	2.7586	51.2652	4.0775	40.5405	0	17.2448	0	75.0487	14.1509	10.2421	21.7216	11.4943	23.3962	7.4974	9.7339	6.4562	8.9204	9.2764	20.7792	7.619	16.4191	32.4826	5.9835	8.4666	0.7547	37.6771	4.37	42.3077
ANKRD20A4	0	0	12.987	39.4561	152.047	7.2016	9.1691	37.9267	0	1.1787	7.018	7.7922	0	0	15.6356	0	0	0.8299	0.8	1.0701	0	0	27.0835	0	0	0	3.1354	0	33.1384	0	0.9311	0	9.7259	0	1.0711	0.6489	1.4347	8.0283	4.9474	0	0.9524	14.8554	5.8005	0.9973	0	1.5094	6.0552	0	4.8077
ANKRD20B	2.2548	2.0011	34.632	40.5225	185.673	26.749	26.7431	40.4551	2.0398	5.3043	12.2815	22.0779	0	0	38.0693	2.6333	0	5.8095	5.6	5.8855	2.3659	2.069	35.7889	12.2324	18.9189	0	9.4062	0	47.7583	7.5472	6.5177	8.0451	6.1892	0.7547	5.3553	5.1914	5.0215	19.6248	12.987	9.5238	10.4762	15.6372	37.123	1.9945	0.9407	6.7925	12.7833	0.7283	29.8077
ANKRD22	119.504	63.0348	10.8225	50.12	5.848	195.473	24.4508	34.7661	33.3163	12.3766	0	53.2468	9.328	23.9583	33.3107	186.966	38.8489	78.8426	20	13.3761	78.0757	35.8621	4.8363	1.0194	8.1081	3.2362	1.5677	43.0916	4.8733	155.66	143.389	32.1802	9.7259	12.8302	14.9948	23.3615	27.977	33.8974	33.3952	14.7186	44.7619	211.884	337.587	48.8656	42.333	9.8113	59.2068	2.9133	198.077
ANKRD23	233.371	210.116	580.087	285.791	165.205	105.967	261.318	504.425	120.347	228.083	314.056	88.3117	189.226	87.5	195.105	347.599	176.978	138.597	239.2	334.938	182.177	104.138	156.697	192.661	187.387	111.111	289.242	437.255	232.944	239.623	192.737	344.328	384.615	221.887	257.053	194.03	215.925	225.685	273.964	179.221	238.095	314.308	147.332	191.473	162.747	137.358	180.312	348.871	101.923
ANKRD24	6.7644	9.005	51.9481	11.7302	14.6199	9.2593	22.9226	69.5322	6.1193	13.5553	8.7725	22.0779	5.3303	4.1667	19.7145	44.7666	17.9856	17.4284	1.6	50.2943	7.0978	9.6552	24.1817	15.2905	20.7207	4.315	7.0547	45.9301	30.2144	59.434	6.5177	11.2631	17.6835	13.5849	8.5684	11.0318	46.6284	15.1646	7.4212	3.4632	9.5238	83.6591	5.8005	8.9753	5.6444	44.5283	28.9306	107.065	19.2308
ANKRD26	378.805	743.411	774.892	373.234	900.585	314.815	790.831	897.598	597.654	187.417	577.232	319.481	660.959	512.5	562.882	264.649	194.245	634.06	782.4	79.1867	415.615	510.345	754.469	1205.91	808.108	152.104	587.106	980.149	896.686	747.17	593.11	690.265	674.624	645.283	1128.89	564.568	474.175	727.902	579.468	910.822	645.714	540.266	292.343	789.828	371.59	413.585	469.618	91.7698	390.385
ANKRD27	4095.83	5455.01	3529.22	3532.92	5185.67	4439.3	4268.96	3731.35	1672.62	4163.25	2368.58	1296.1	1346.57	1704.17	5009.52	2098.76	3107.19	5106.51	4450.4	1135.37	1581.23	1662.76	2962.74	3732.93	2538.74	790.723	3732.71	3268.39	2619.88	4333.02	5996.28	2864.84	1961.98	2136.6	3273.14	3818.95	4753.95	4926.72	2387.14	2329	5959.05	2890.54	1544.08	5799.05	3298.21	1165.28	1929.6	2139.84	1182.69
ANKRD28	7564.83	5310.93	7117.97	6162.62	2938.6	6792.18	4057.31	6577.12	8019.72	2515.99	3681.83	5281.82	10449.4	3566.67	2603.67	7788.07	15233.1	7903.35	10161.6	3559.66	7881.7	9878.62	4058.66	6189.6	4626.13	3531.82	4238.29	8415.32	11378.2	9624.53	10621	6325.82	7700.27	4289.81	10305.7	2160.93	5567.43	7695.6	7586.89	7169.7	10579	6450.35	2583.53	7455.5	14707.4	12430.2	4980.77	5924.25	3916.35
ANKRD32	199.549	197.109	325.758	347.641	352.339	222.222	391.977	421.618	246.813	140.268	241.244	371.429	218.543	202.083	324.269	115.867	127.338	219.929	270.4	143.927	212.934	265.517	407.22	367.992	309.91	101.402	301.783	428.069	316.764	253.774	171.322	359.614	347.48	371.321	392.006	309.539	290.531	404.985	299.938	383.55	228.571	261.142	296.984	184.493	256.82	375.094	289.979	99.0532	165.385
ANKRD34A	28.1849	35.0193	30.303	22.394	19.0058	6.1728	17.574	29.7092	19.0379	22.3958	45.6171	22.0779	36.6459	14.5833	12.9164	14.4833	11.5108	40.6662	46.4	14.4462	26.8139	23.4483	17.4108	12.2324	28.8288	33.4412	19.5963	16.5348	22.4172	17.9245	26.0708	28.1577	29.1777	13.5849	14.9948	17.5211	17.2166	15.1646	22.8819	9.5238	28.5714	41.4386	9.2807	19.9452	20.6961	21.8868	53.8244	50.2549	26.9231
ANKRD34B	1.1274	0	1.0823	0	0	0	1.5282	0	3.3996	0	0	1.2987	0	0	0	2.6333	0	0.8299	0.8	0	0.7886	2.7586	0	0	0	2.1575	0	0	6.8226	0.9434	0	0.8045	0	0.7547	0	0	0	2.6761	0.6184	0	2.8571	3.1274	0	0	0	1.5094	0	0	0
ANKRD35	138.67	34.0188	5.4113	85.3106	0	176.955	70.2961	19.5954	0	11.1979	9.6498	2.5974	3.3314	0	2.0394	6.5833	108.633	107.06	144	65.2755	0	2.069	0	8.1549	13.5135	0	0	25.7209	3.8986	2.8302	162.942	12.8721	2.6525	6.7925	2.1421	14.2764	20.0861	4.4602	23.5003	2.5974	160	1.5637	107.889	420.843	132.643	0	63.9165	29.1333	45.1923
ANKRD36	1937.99	1225.68	2834.42	5855.51	5644.74	2042.18	2248.71	2290.14	1980.62	944.747	2856.33	1918.18	1832.3	2434.38	1518.69	1947.35	1082.01	2042.44	2306.4	1156.77	1450.32	1664.83	2318.54	1924.57	3649.55	1848.98	3013.91	4103.4	1570.18	2184.91	1452.51	2345.13	3812.56	2787.17	3821.52	1512.01	1291.97	2288.07	1826.22	2385.28	2121.9	2947.62	2406.03	2123.16	2217.31	2574.34	1914.8	1973.78	811.538
ANKRD36B	205.186	286.158	784.632	1922.69	2068.71	301.44	683.095	661.188	749.957	269.338	740.401	406.493	1095.38	388.542	276.003	520.082	201.439	731.991	737.6	246.121	423.502	972.414	684.826	266.055	948.649	411.003	639.624	1703.09	402.534	383.962	456.238	570.394	685.234	815.849	971.446	607.398	520.086	897.389	410.637	996.537	356.19	551.994	609.049	760.908	603.951	1049.06	676.169	572.469	155.769
ANKRD36BP1	405.863	286.158	804.113	503.332	957.602	229.424	610.506	637.8	676.526	525.122	613.2	1324.68	764.234	177.083	557.444	146.15	376.259	395.873	460.8	41.1985	485.804	694.483	659.677	909.276	495.495	885.653	805.017	838.684	673.489	576.415	446.927	699.919	704.686	596.981	706.895	816.353	544.476	732.362	562.771	644.156	530.476	408.913	620.65	600.349	666.039	502.642	635.801	507.647	477.885
ANKRD37	12.1308	10.0055	27.3701	7.614	4.4444	5.5556	25.8262	22.8824	0	1.5088	16.8608	111	3.7779	4.7396	8.3209	10.7703	5.482	15.893	8.368	13.5955	8.3833	4.9103	10.756	23.4149	18.6216	6.0194	17.2761	49.0074	39.5127	15.8868	8.9479	34.4811	19.8585	4.8906	2.6776	3.011	3.2712	0.9277	5.0959	12.658	9.1429	35.5199	7.4014	13.6325	7.0649	22.0151	12.6218	18.0918	29.2115
ANKRD39	122.886	121.067	256.493	103.439	89.1813	94.6502	129.131	203.54	53.7141	156.181	138.606	161.039	111.27	135.417	133.923	276.5	113.669	80.5024	115.2	250.401	87.5394	72.4138	50.2979	117.227	90.991	93.8511	85.4399	181.883	76.9981	107.547	104.283	155.269	129.089	140.377	83.5422	138.222	114.06	107.044	134.199	72.7273	128.571	234.558	98.6079	105.709	73.3772	73.2075	108.994	252.003	65.3846
ANKRD40	923.337	982.543	1148.27	731.538	972.222	933.128	1180.52	1164.35	1155.19	992.486	1180.78	1889.61	1454.51	1038.54	1218.9	1096.78	1002.88	795.065	1019.2	673.087	1261.04	1384.83	1165.56	1093.78	1262.16	2005.39	1393.69	1275.94	1247.56	1296.23	1199.26	1039.42	1182.14	1227.17	1254.2	1144.71	1208.03	1353.22	1348.18	1358.44	1232.38	1538.7	1547.56	1200.7	1111.95	1159.25	1132.33	1699.2	1525.96
ANKRD42	270.575	291.161	320.346	348.707	226.608	404.321	233.047	321.745	254.972	193.311	239.49	441.558	144.585	209.375	169.273	260.7	380.575	617.462	411.2	278.224	208.99	245.517	172.174	247.706	313.514	249.191	273.565	246.185	399.61	493.396	466.48	247.788	249.337	347.925	336.311	236.859	192.252	280.992	220.161	285.714	460.952	344.019	233.179	253.303	397.93	279.245	319.582	206.118	229.808
ANKRD44	998.873	811.448	1298.7	1387.36	3280.7	783.951	513.467	745.259	688.084	841.609	1459.75	344.156	895.493	451.042	885.112	704.415	984.173	1238.24	1113.6	275.548	432.965	832.414	1298.07	603.466	628.829	417.476	1000.98	923.196	699.805	433.962	1044.69	770.716	707.339	802.264	894.33	1410.77	928.264	1064.2	654.298	837.229	1863.81	643.471	1733.18	1525.8	2436.5	984.151	1652.41	759.65	1707.69
ANKRD46	175.874	329.182	211.039	267.385	381.579	386.831	260.554	290.771	395.716	144.394	254.658	410.104	106.606	225	247.811	46.0833	123.022	385.914	510.784	48.1541	316.246	209.655	354.697	248.726	198.198	101.402	506.126	285.685	453.216	329.245	276.536	314.755	323.607	298.868	674.764	268.138	277.618	220.333	361.163	242.424	299.048	235.34	147.332	203.44	154.28	208.302	191.258	148.58	161.538
ANKRD49	412.627	491.271	566.017	620.635	866.959	698.56	498.185	752.845	683.325	386.032	687.766	597.403	561.682	480.208	499.66	725.482	506.475	769.338	528.8	517.389	637.224	511.724	679.989	420.999	536.937	206.041	882.618	724.778	956.14	684.906	357.542	595.334	742.706	704.906	801.148	673.589	601.148	438.882	586.889	594.805	491.429	822.518	415.313	501.62	690.499	581.887	1177.41	272.396	529.808
ANKRD5	10.1466	2.0011	7.5758	9.5974	30.7018	5.144	83.2856	15.1707	10.8788	1.1787	154.397	1.2987	3.9977	85.4167	3.399	3.95	12.9496	9.1291	43.2	2.6752	26.8139	12.4138	20.3126	27.5229	189.189	4.315	7.0547	107.477	31.1891	4.717	10.2421	123.089	108.753	134.34	138.166	16.8722	27.977	24.977	40.8163	68.3983	23.8095	14.8554	38.2831	8.9753	17.8739	118.491	158.109	16.7516	19.2308
ANKRD50	913.191	821.454	1264.07	2175.42	6181.29	1312.76	1105.64	1453.22	1469.32	1687.93	1203.59	823.377	809.541	645.833	1233.17	599.082	1082.73	1615.86	1455.2	496.522	1534.7	968.966	1086.24	1406.73	992.793	454.153	1498.73	2000.72	1955.17	1146.23	1807.26	1337.89	1336.87	875.472	2639.08	1548.35	2283.36	1921.45	473.098	523.809	1934.29	770.915	1531.32	897.532	1149.58	1113.21	1334.84	415.878	732.692
ANKRD52	2172.49	2145.19	2661.26	2427.09	1546.78	1396.09	2347.28	2920.35	2244.43	3332.84	3292.33	2338.96	2991.64	1212.5	3079.54	1543.13	2784.17	1821.68	2541.6	1970.57	1988.96	2251.03	2063.18	2179.41	2519.82	2653.72	2194	2402.15	2144.25	2084.91	2350.09	2627.51	3149.43	2058.87	1912.9	2358.21	2283.36	1987.46	2735.31	2077.06	2912.38	1830.34	1902.55	2639.74	3034.81	2660.38	1965.94	4594.32	1749.04
ANKRD53	10.1466	4.0022	12.987	8.5311	4.386	0	3.8204	9.4817	4.0796	1.1787	5.2635	0	1.9989	3.125	4.7587	6.5833	12.2302	4.9795	8	35.848	10.2524	0.6897	2.9018	7.1356	5.4054	2.1575	0	4.593	6.8226	2.8302	22.3464	3.218	6.1892	0.7547	3.2132	3.2446	5.0215	1.7841	4.329	4.329	8.5714	6.2549	5.8005	0.9973	9.4073	3.7736	6.0552	24.7633	0
ANKRD54	498.309	462.255	577.922	478.806	182.749	382.716	343.075	437.421	297.807	402.534	391.255	371.429	317.82	337.5	369.137	514.816	429.496	409.981	480.8	509.363	359.622	341.379	192.486	231.397	372.072	318.231	228.885	352.743	322.612	490.566	450.652	389.38	440.318	341.887	317.032	313.433	333.572	316.673	337.044	255.411	404.762	505.864	302.784	477.686	481.656	226.415	509.313	676.62	237.5
ANKRD55	2.2548	15.0083	16.2338	8.5311	1.462	1.0288	5.3486	1.2642	10.1989	2.3574	40.3536	0	0.6663	2.0833	4.0789	7.9	3.5971	7.4693	7.2	1.6051	41.0095	7.5862	5.8036	4.0775	14.4144	4.315	2.3516	4.593	0	3.7736	1.8622	15.2856	3.5367	15.0943	1.0711	9.085	7.891	2.6761	40.1979	6.0606	6.6667	6.2549	20.8817	3.989	6.5851	3.7736	47.0963	0.7283	0
ANKRD57	1.1274	2.0011	3.2468	3.1991	0	0	6.1127	0.6321	0	1.1787	6.1408	5.1948	0	0	4.7587	2.6333	5.7554	7.4693	2.4	2.1402	4.7319	0.6897	0.9673	7.1356	45.045	0	1.5677	1.8372	0	6.6038	32.5885	4.0225	4.4209	0	0	0.6489	1.4347	0.892	0	2.5974	7.619	3.9093	12.761	3.989	7.5259	0	10.7649	0.7283	33.6538
ANKRD58	85.6821	106.059	59.5238	106.638	19.0058	63.786	75.6447	49.3047	102.669	136.732	35.9674	77.9221	51.9706	41.6667	23.1135	39.4999	76.259	101.251	86.4	32.1027	189.274	90.3448	40.6252	69.317	10.8108	248.112	3.9193	62.465	21.4425	21.6981	112.663	45.8568	15.0309	27.9245	21.4211	89.5522	141.32	33.0054	110.08	19.0476	71.4286	46.1298	77.7262	90.7504	64.9106	27.1698	25.5666	154.406	63.4615
ANKRD6	130.327	85.7174	190.498	173.671	53.4064	100.761	88.8863	102.958	146.925	46.3474	144.089	23.7273	207.716	10.7083	34.1264	168.401	88.1223	127.7	72.232	196.934	133.904	174.821	103.411	104.903	51.7568	125.728	236.849	200.972	110.897	40.0755	91.0149	91.2068	123.015	58.6566	63.4385	71.5574	58.0918	143.404	98.0148	52.1732	115.267	110.156	97.4478	68.3919	168.721	336.423	219.469	184.683	113.25
ANKRD9	29.3123	31.0171	37.8788	29.8587	16.0819	14.4033	74.1165	63.8432	48.9546	686.017	84.2163	33.7662	131.259	80.2083	174.711	22.3833	238.13	43.9859	44	1336.01	9.4637	39.3103	1.9345	97.8593	218.018	9.7087	12.5416	70.7324	19.4932	30.1887	41.8994	142.397	81.3439	60.3774	7.4974	51.9143	48.0631	4.4602	77.3036	21.645	131.429	35.9656	102.088	68.8108	66.7921	29.434	136.579	152.95	2.8846
ANKS1A	1502.82	2884.59	2414.5	1655.03	694.444	1023.66	1261.51	1294.56	1560.43	1109.77	1063.23	594.805	1324.58	720.833	805.574	1098.1	1295.68	1424.15	3685.6	735.688	1272.87	1197.93	678.055	920.489	751.351	1213.59	685.087	1570.81	2471.73	1408.49	2716.01	1465.81	1205.13	924.528	1128.89	1016.87	1057.39	1117.72	1027.83	1137.66	5661.9	1074.28	1110.21	2302.67	1096.9	1186.42	647.238	1153.68	925.962
ANKS3	623.45	591.327	756.494	688.883	233.918	458.848	404.967	500.632	353.561	394.283	493.893	187.013	303.828	246.875	320.87	595.132	403.597	516.212	474.4	446.228	357.255	313.103	204.094	179.409	306.306	261.057	261.807	510.743	354.776	583.962	393.855	415.125	462.423	341.887	446.629	358.858	342.898	283.668	340.755	372.294	578.095	537.92	257.541	459.736	416.745	340.377	284.596	496.723	171.154
ANKS6	286.358	168.093	666.667	99.1736	16.0819	87.4486	272.779	998.736	53.0342	35.3617	264.93	274.026	322.484	87.5	229.776	653.066	33.0935	224.909	184	226.859	174.29	35.1724	434.303	182.467	173.874	6.4725	199.882	519.01	301.17	562.264	173.184	177.796	160.035	225.66	379.153	158.339	168.58	165.919	324.675	86.5801	237.143	731.822	111.369	249.314	78.0809	417.358	392.245	827.385	43.2692
ANKZF1	753.1	973.538	1085.5	1267.93	612.573	1078.19	643.362	1293.3	789.393	935.907	1091.3	393.507	542.359	567.708	619.986	741.282	1190.65	1442.4	821.6	872.124	750	733.103	631.626	466.87	969.369	484.358	852.048	900.231	861.598	986.793	981.378	802.896	996.463	969.057	821.498	723.556	738.881	315.781	746.444	553.247	955.238	1206.41	556.845	739.965	764.817	852.83	1392.71	879.825	461.538
ANLN	457.723	483.267	959.957	1797.92	438.596	201.646	1048.33	810.367	686.044	648.888	348.269	388.312	221.874	236.458	1065.94	348.916	496.403	312.881	819.2	203.852	573.344	570.345	420.761	943.935	748.649	413.161	253.184	910.335	310.916	552.83	486.965	623.492	184.792	753.207	905.04	899.416	928.264	755.555	680.89	677.922	637.143	1398.75	1607.89	542.508	666.98	91.3208	729.993	104.151	42.3077
ANO10	843.292	481.266	246.753	780.592	263.158	682.099	287.297	297.724	226.415	85.4575	348.269	118.182	449.079	331.25	176.75	421.333	531.655	385.084	597.6	467.63	243.691	315.862	174.108	409.786	295.495	226.537	236.724	382.139	357.7	296.226	662.011	465.004	485.411	264.906	334.169	171.966	197.274	688.652	131.107	374.026	475.238	311.181	441.995	490.651	523.048	852.83	518.06	307.356	196.154
ANO5	18.0383	2.0011	35.7143	73.5804	0	0	0	295.828	0.6799	0	0	163.636	0	0	2.7192	7.9	94.2446	39.8363	73.6	1.0701	44.164	1.3793	0	7.1356	0.9009	0	126.984	164.43	110.136	149.057	121.974	2.4135	71.618	1.5094	0	0	1.4347	3.5681	0	0	34.2857	7.8186	2.3202	201.446	103.481	0	17.4929	1.4567	0
ANO6	572.717	846.468	1990.26	724.074	1684.21	584.362	1854.44	1974.08	1809.96	1296.01	2005.4	1362.34	2051.5	963.542	1570.36	1770.91	968.345	728.672	976.8	630.284	1503.94	1828.97	1479.92	1816.51	2236.04	1162.89	2531.06	1965.81	2227.1	2182.08	1043.76	1820.6	2047.75	1999.25	1962.17	1580.79	1498.57	2082.91	1921.46	2499.57	1323.81	2115.72	2995.36	1301.42	1533.4	1133.58	1459.99	659.141	2464.42
ANO7	1077.79	1879.04	64.9351	2000.53	5.848	875.514	1314.23	35.3982	8.839	5.8936	1372.9	15.5844	25.9853	591.667	4.7587	25.0166	1412.23	1384.31	2894.4	1504.55	12.6183	5.5172	18.3781	94.8012	697.297	18.3387	65.0598	728.452	22.4172	34.9057	793.296	256.637	1162.69	1969.81	489.471	5.8404	5.7389	64.2266	254.793	195.671	927.619	53.9484	127.61	3009.72	224.835	14.3396	1026.7	517.116	40.3846
ANO8	243.518	573.317	299.784	219.675	13.1579	103.909	143.649	620.101	433.792	302.343	210.541	302.597	576.34	7.2917	158.396	250.166	802.158	300.432	472	1327.45	250.789	404.138	82.2178	45.8716	57.6577	481.122	246.914	153.407	235.867	415.094	522.346	216.412	336.87	153.962	130.669	166.126	152.798	287.236	249.845	15.5844	339.048	218.139	360.789	586.387	1320.79	384.906	246.919	974.508	286.538
ANO9	32.6945	86.0475	71.4286	26.6596	4.386	22.6337	89.3983	200.379	48.2747	76.0277	337.742	6.4935	11.3269	46.875	12.9164	114.55	85.6115	107.89	44	275.548	101.735	103.448	38.6907	14.2712	70.2703	32.3625	24.2994	16.5348	14.6199	57.5472	13.0354	42.6388	284.704	57.3585	11.7816	53.8611	20.0861	11.5965	14.8423	10.3896	89.5238	75.0586	18.5615	66.8163	130.762	727.547	927.798	806.992	39.4231
ANP32A	3078.92	3446.9	2887.45	3363.37	3751.46	4306.58	3733.33	2866.62	3405.75	3206.13	2531.75	3415.58	3688.58	5717.71	3145.48	2616.21	3123.74	3140.42	2843.2	3944.36	4333.6	3153.79	2941.46	4983.69	4040.54	2280.47	4422.5	3197.66	4959.06	3914.15	2898.51	3251.01	2961.98	3695.85	3511.99	3755.35	3360.83	2972.27	2635.75	3890.04	2695.24	4160.28	3879.35	3174.27	2136.41	3135.09	2887.68	3107.79	2836.54
ANP32B	5289.74	4189.31	2475.11	2748.07	3830.41	7937.24	4363.71	3262.96	1741.97	4459.7	2995.82	5728.57	5047.14	9323.96	5001.36	5249.54	3033.81	5628.53	3381.6	6793.47	3910.09	3106.9	5014.32	6203.87	4782.88	7167.21	4661.57	3389.64	2447.37	2370.75	3743.02	3543.85	2469.5	3950.94	3920.06	4650.23	3553.08	4242.53	3126.78	5327.27	3558.1	4991.4	4454.76	4055.85	2031.04	5403.77	3672.84	3897.31	2886.54
ANP32E	1978.58	1542.85	1449.13	2625.43	1194.44	4188.27	2065.33	1545.51	1981.3	1317.81	1529.05	3667.53	1828.3	2259.38	1892.59	2009.23	1505.76	2342.87	1487.2	829.856	2107.26	1788.97	1712.06	3328.24	2409.01	1306.36	1377.23	1892.32	1500.97	1481.13	1768.16	1909.09	984.085	1754.72	1791.87	2307.59	1953.37	2420.99	1690.17	1757.58	1729.52	2645.04	3410.67	1735.23	1771.4	1159.25	2381.73	1005.1	1168.27
ANPEP	10002.3	4510.49	3898.27	4228.21	1590.64	10002.1	3896.08	1375.47	1064.08	3672.31	2893.18	422.078	9493.95	1978.12	1670.29	603.032	17895	3166.98	3485.6	3131.62	1122.24	3921.38	1518.61	1990.83	1736.94	5728.16	863.022	3584.39	377.193	451.887	7256.98	5654.87	4623.34	1019.62	483.045	989.617	1055.24	4179.19	1054.42	3567.1	3443.81	390.149	653.132	4746.95	13594.5	4455.09	2973.8	4675.89	1683.65
ANTXR1	20.2931	7.0039	47.619	63.9829	2.924	17.4897	14.5177	39.1909	10.8788	30.0575	12.2815	15.5844	0.6663	0	84.2964	1.3167	0	10.789	21.6	0	22.082	6.2069	0	101.937	18.9189	8.63	14.1093	30.3139	0	18.8679	102.421	4.0225	2.6525	3.0189	21.4211	21.4147	19.3687	13.3806	8.658	6.0606	71.4286	25.8014	24.3619	22.9369	0.9407	16.6038	26.2394	13.8383	0
ANTXR2	1682.07	1349.75	2504.33	1580.38	2290.94	2841.56	1476.98	2637.17	2538.84	1773.98	2170.32	3946.75	2992.3	1421.88	1428.96	2122.46	2635.97	2047.42	1556.8	1575.71	3130.91	3280	2052.54	2444.44	943.243	2364.62	2102.29	2648.33	4552.63	2403.77	3143.39	1599.36	2188.33	1678.49	2365.96	1628.16	2250.36	1860.79	2110.08	3585.28	3209.52	2362.78	3191.42	1203.69	3942.62	2754.72	1494.97	1967.23	4290.38
ANUBL1	266.065	391.216	126.623	323.114	299.708	292.181	245.272	280.025	242.053	225.726	302.652	148.052	266.516	130.208	169.952	72.4165	223.741	449.818	262.4	221.509	296.53	271.724	164.435	203.874	269.369	290.183	301.783	312.325	457.115	58.4906	415.27	415.929	389.92	304.906	185.292	325.762	250.359	245.31	68.6456	335.065	392.381	138.389	189.095	312.142	459.078	119.245	250.283	82.3015	134.615
ANXA1	14649.4	9104.03	6804.11	2366.3	2919.59	13532.9	7361.22	6480.4	2587.12	4505.67	7712.81	5276.62	8346.6	13431.2	1351.46	19241.7	17921.6	15756.9	7564.8	15998.9	13998.4	7448.28	1216.82	9062.18	5250.45	5655.88	8957.87	12569.2	15319.7	23147.2	14531.7	7810.94	11097.3	16704.9	13693.4	5439.33	5700.86	9612.59	11437.2	13601.7	8822.86	21257.2	8750.58	7811.52	33512.7	9733.58	3130.56	3825.2	17653.8
ANXA11	2888.39	2742.52	2199.13	3820.85	1789.47	3854.94	2270.11	2187.74	1718.85	3695.3	2451.92	3268.83	2677.82	3265.62	2450.03	4123.79	4356.12	2266.52	2485.6	5291.6	1980.28	2300	1414.15	1965.34	1564.86	4536.14	2217.52	1941.01	1956.14	1983.96	2530.73	2502.82	2560.57	2009.06	1565.88	2260.87	2398.13	2932.12	2384.66	2439.83	2197.14	2080.53	2698.38	2485.17	3143.93	2323.02	2021.78	6571.74	2783.65
ANXA2	3627.96	4664.58	97.4026	1707.28	222.222	2158.44	64.9475	163.085	1669.9	1464.56	547.406	87.013	2093.48	289.583	98.5724	920.348	12052.5	3673.23	1952.8	7468.7	1748.42	2912.41	25.149	409.786	266.667	1045.31	35.2734	496.045	692.008	1427.36	4931.1	984.714	1000	716.981	188.506	659.961	825.682	701.141	1292.52	1143.72	2728.57	885.848	4170.53	2664.67	14377.2	1235.47	978.931	857.247	6325.96
ANXA2P1	72.1533	40.0221	2.1645	23.4604	10.2339	13.3745	1.5282	9.4817	33.3163	31.2362	10.527	1.2987	36.6459	5.2083	1.3596	15.8	261.87	55.6048	19.2	146.067	22.8707	45.5172	0	2.0387	4.5045	23.7325	7.8385	14.6976	12.6706	18.8679	54.0037	17.6991	4.4209	15.8491	5.3553	10.3829	8.6083	8.0283	27.8293	28.5714	42.8571	21.1102	37.123	8.9753	159.925	31.6981	16.1473	18.9366	31.7308
ANXA2P2	1347.24	1814	40.0433	576.913	86.2573	674.897	24.4508	56.2579	545.3	393.694	184.223	14.2857	740.247	127.083	58.4636	362.083	3491.37	1087.2	731.2	1677.37	653.785	1020	19.3454	219.164	100.901	441.208	25.0833	191.069	294.347	555.66	1768.16	353.982	435.897	250.566	81.4001	210.902	348.637	304.185	453.927	425.108	1001.9	290.07	1466.36	1186.74	5320.79	466.415	385.517	222.87	2633.65
ANXA3	22.5479	2.0011	0	227.139	2.924	279.835	77.937	2.5284	15.6383	7.6617	7.018	2.5974	47.3065	14.5833	12.2366	244.9	307.194	29.8772	13.6	48.1541	85.1735	28.9655	0	19.368	17.1171	5.3937	0	123.093	0	0.9434	138.734	29.7667	128.205	94.3396	16.0658	42.1804	58.1062	165.027	27.2109	33.7662	32.381	98.5145	74.2459	36.8985	90.3104	61.1321	54.4972	29.1333	0
ANXA4	273.957	253.14	491.342	306.052	546.784	260.288	710.602	455.12	509.944	519.228	495.648	290.909	731.585	755.208	407.206	745.232	371.942	154.365	320	505.618	493.691	644.138	635.495	534.149	462.162	501.618	434.254	767.952	910.331	528.302	234.637	946.903	1417.33	704.906	455.198	601.557	655.667	485.268	1134.2	804.329	208.571	652.072	706.496	230.367	525.87	1057.36	628.4	471.231	1266.35
ANXA5	85.6821	1099.61	56.2771	139.696	38.0117	425.926	75.6447	28.445	65.9527	80.7426	236.858	18.1818	10.6606	167.708	93.1339	393.683	1702.16	347.737	382.4	2218.3	179.811	96.5517	59.0033	115.189	119.82	548.004	65.0598	32.1511	97.4659	28.3019	92.1788	163.315	556.145	198.491	49.2685	177.807	1162.84	209.629	299.938	57.1429	276.19	351.837	1990.72	507.604	2558.8	866.415	822.84	276.038	3940.38
ANXA6	1696.73	2252.24	813.853	2507.06	247.076	1345.68	1387.58	1226.3	3321.43	1548.25	1768.54	241.558	4445.48	2086.46	480.625	2250.18	4213.67	1619.18	2618.4	3480.47	4414.04	4153.1	2113.48	1048.93	1061.26	4595.47	379.385	1591.94	685.185	292.453	1996.28	1704.75	3017.68	1301.13	1913.97	1143.41	1258.25	2000.84	3372.91	3334.2	2213.33	1362	2445.48	2411.37	4935.09	1922.26	2102.52	3017.48	2383.65
ANXA7	2576.1	1879.04	1564.94	1747.8	2349.42	1445.47	1901.05	1479.77	1395.21	1874.17	2088.74	1007.79	2234.07	1626.04	1891.91	1730.1	1424.46	1714.62	1952.8	1948.1	1871.45	1893.79	1533.12	2521.92	2109.01	1245.95	2037.23	1813.32	1537.04	1532.08	2248.6	2060.34	1986.74	2170.57	2281.34	2051.91	2497.85	2121.26	2422.39	2159.31	1945.71	1901.49	1537.12	2264.77	1657.57	1814.34	1731.8	994.902	1702.88
ANXA8	2856.73	1165.64	2.1645	41.5889	1.462	1312.76	0.7641	6.9532	12.9186	2.9468	0	6.4935	13.9921	0	1.3596	60.5666	10592.7	2600.42	105.6	11.236	46.53	23.4483	0	0	0	56.0949	0	0.9186	0.9747	22.6415	1843.14	0	0.8842	0	2.1421	4.5425	3.5868	41.0337	9.8949	7.7922	339.048	92.2596	4.6404	684.867	4987.8	0.7547	0	16.7516	20.1923
ANXA8L2	540.023	55.0304	0	2.1328	0	208.848	0	1.8963	1.3599	1.7681	0	0	5.3303	2.0833	0	18.4333	1838.85	192.542	12	1.6051	9.4637	6.8966	0	0	0.9009	12.945	0	0	2.924	4.717	225.326	0	0	0	2.1421	0	0.7174	8.9204	1.2369	4.329	122.857	24.2377	0	144.602	2400.75	0.7547	0	3.6417	0.9615
ANXA9	29.3123	78.0431	119.048	11.7302	20.4678	31.893	46.6094	107.459	92.4698	31.2362	59.6532	106.493	39.3111	29.1667	26.5126	55.2999	74.8201	69.7134	40.8	36.9181	85.9621	53.1034	37.7234	37.7166	57.6577	99.2449	85.4399	78.9998	76.0234	102.83	43.7616	64.3604	96.3749	50.566	59.979	38.2868	43.0416	43.7098	47.0006	42.4242	64.7619	71.9312	62.645	33.9068	76.1994	64.1509	54.4972	72.1049	45.1923
AOAH	3850.06	1651.91	3341.99	1244.47	959.064	1731.48	235.339	2771.81	131.226	600.56	1033.4	219.481	22.6538	627.083	622.706	2549.06	1446.04	2649.11	841.6	1927.77	305.994	185.517	314.362	1866.46	462.162	36.6775	279.051	879.103	1999.03	2068.87	3053.07	572.003	209.549	362.264	133.882	1583.39	700.861	156.106	558.442	517.749	1655.24	2075.84	4750.58	3274	1510.82	156.226	948.655	56.8099	4025
AOC2	38.3315	14.0077	84.4156	33.0579	20.4678	19.5473	18.3381	54.9937	21.0777	13.5553	21.9313	27.2727	27.9841	2.0833	22.4337	46.0833	14.3885	16.5984	17.6	28.3574	28.3912	17.2414	27.0835	24.4648	16.2162	20.4962	41.5442	19.2907	32.1637	54.717	17.6909	15.2856	16.7993	18.8679	16.0658	22.7125	22.2382	20.5168	14.2239	21.645	20.9524	54.7303	41.7633	13.9616	20.6961	49.0566	21.5298	18.9366	16.3462
AOC3	30.4397	8.0044	96.3203	54.3855	7.3099	28.8066	8.405	38.5588	16.3182	18.2702	10.527	48.0519	14.6584	0	49.6261	61.8832	7.9137	27.3874	8.8	16.0514	16.5615	5.5172	27.0835	34.6585	9.9099	20.4962	9.4062	18.3721	25.3411	45.283	23.2775	5.6315	6.1892	4.5283	11.7816	12.3297	15.0646	15.1646	5.5659	5.1948	54.2857	33.62	33.6427	11.9671	6.5851	23.3962	19.5113	10.1966	3.8462
AOX1	16.9109	0	8.658	6.3983	2.924	6.1728	4.5845	16.4349	2.0398	1.1787	0	12.987	1.3326	0	2.0394	3.95	1.4388	0	3.2	2.6752	36.2776	89.6552	0.9673	19.368	1.8018	0	6.2708	23.8837	10.7212	5.6604	5.5866	12.8721	1.7683	9.8113	19.279	1.2979	7.1736	13.3806	3.7106	1.7316	2.8571	6.2549	1.1601	0.9973	0	0.7547	2.6912	0.7283	0
AOX2P	0	34.0188	102.814	109.837	77.4854	0	187.966	3.1606	896.821	165.021	153.519	0	245.194	9.375	37.3895	0	0	180.923	0.8	0.535	46.53	10.3448	2.9018	0	5.4054	2.1575	108.172	10.1046	1.9493	0	0	0.8045	0	0	2.1421	232.317	1.4347	0	145.949	1.7316	0	2.3456	0	0.9973	0	56.6038	4.0368	42.2433	11.5385
AP1AR	342.728	381.211	445.887	283.658	640.351	354.938	444.699	356.511	506.544	318.255	430.731	428.571	362.461	471.875	515.296	164.583	246.043	440.689	329.6	69.0209	541.01	615.172	457.518	465.851	424.324	265.372	631.001	464.813	479.532	293.396	415.27	363.636	400.531	406.793	460.553	502.92	452.654	455.831	435.993	572.294	448.571	358.874	380.51	316.131	241.769	406.038	390.9	188.638	379.808
AP1B1	3188.28	4003.21	2080.09	2215.94	1437.13	1648.15	5049.09	3000.63	7785.14	6803.01	3258.12	1027.27	5126.43	2040.62	4734.87	2747.88	3443.17	2504.7	4552.8	4249.87	16551.3	7697.24	2080.59	2715.6	3163.96	8174.76	1940.04	1896.91	1495.13	2242.45	6442.27	3277.55	2728.56	2356.23	2640.15	2994.81	4078.91	4152.43	3459.49	2345.45	3580.95	1935.89	2800.46	4065.82	2989.65	8113.96	4335.55	6728.33	2346.15
AP1G1	2587.37	2176.2	2740.26	3772.86	3381.58	2199.59	2889.78	2267.38	2774.77	1792.84	2681.76	2072.73	2153.45	1455.21	2135.28	2100.08	2579.86	3048.3	2686.4	5604.07	2548.9	2786.9	3194.89	2969.42	2981.08	1973.03	2993.53	2899.11	2497.08	2650.94	2607.08	3127.11	2921.31	2952.45	3281.71	2754.7	2432.57	2750.15	2470.62	2469.26	3018.1	2003.13	2954.76	3123.41	3386.64	2898.11	2652.87	1830.3	2563.46
AP1G2	4038.15	4800.85	3462.58	4905.25	3668.38	2721.82	3615.95	6171.91	4588.01	5923.65	4100.71	2042.91	3007.41	3079.1	4066.57	4909.59	3544.13	3479.58	3195.61	8958.75	3313.9	3726.94	2637.4	1337.89	2983.8	2458.37	4131.96	4537.49	2428.3	5030.77	3023.53	3772.35	5878.32	5454.51	3705.12	3975.09	5117.96	3470.3	5491.29	2783.81	2522.37	5413.86	2071.37	3207.3	3824.78	5153.95	4167.08	9792.81	3094.13
AP1M1	1821.87	1742.96	1491.34	1758.46	755.848	876.543	1549.57	1306.57	1293.22	2369.24	1443.96	1712.99	1483.16	1189.58	1987.08	1803.83	2133.81	974.328	1948.8	1899.95	1788.64	1790.34	872.475	1128.44	1089.19	2236.25	921.027	1092.22	956.14	1258.49	1904.1	1621.88	1698.5	1289.81	918.964	1532.12	1926.83	1676.14	1594.93	1054.55	1721.9	1502.74	1667.05	2599.85	2486.36	1341.89	1129.64	2780.04	1370.19
AP1S1	218.715	234.129	181.818	190.882	5.848	379.63	201.719	332.49	80.2312	141.447	114.92	754.545	212.546	347.917	72.0598	258.066	241.727	166.814	228	285.714	189.274	235.172	275.671	188.583	236.036	367.853	253.968	150.651	224.172	230.189	211.359	246.179	164.456	174.34	215.282	155.094	129.842	90.0957	306.122	192.208	140	205.629	147.332	202.443	220.132	115.472	137.925	254.916	171.154
AP1S2	139.797	198.109	517.316	163.156	1385.96	426.955	325.501	553.097	420.194	546.928	411.432	1457.14	626.312	638.542	759.347	788.682	610.791	352.717	60	533.975	633.281	418.621	819.276	564.73	324.324	528.587	947.678	541.057	1174.46	725.472	423.65	480.29	540.23	492.83	653.343	883.193	846.485	545.034	469.388	724.675	476.19	671.619	2054.52	175.517	366.886	687.547	569.866	222.87	1886.54
AP1S3	81.1725	64.0354	109.307	230.339	55.5556	112.14	196.371	84.0708	129.866	32.4149	180.714	335.065	31.9819	335.417	24.4731	114.55	20.8633	52.2851	90.4	140.717	127.76	151.724	55.1343	222.222	193.694	131.607	32.9218	225.058	413.255	178.302	54.9348	127.916	99.9116	241.509	295.611	136.924	101.148	219.441	295.609	180.087	39.0476	240.813	1241.3	75.7916	44.2145	127.547	233.463	99.7815	339.423
AP2A1	1617.52	1991.74	1624.58	1852.94	1047.51	1146.53	1740.68	1632.84	1918.44	5322.6	1790.66	1266.97	1906.27	1622.92	3545.76	1737.72	3021.13	1374.3	1864.2	3025.25	1937.6	2729.86	1164.26	1724.72	1687.62	3486.96	1219.56	1348.13	1194.12	1272.2	2124.58	1863.76	1690.88	1573.85	1160.33	1719.29	2276.84	1684.14	2263.18	1250.03	2177.87	1259.84	2118.52	2004.34	2256	1766.27	1520.19	3598.38	2356.14
AP2A2	1092.45	1639.91	799.784	907.491	733.918	1082.3	1160.65	1258.53	1158.59	2269.63	1081.65	506.493	2551.89	832.292	1441.2	1066.5	1738.85	1307.96	1572.8	1909.04	1455.05	1637.24	1161.69	623.853	991.892	1302.05	855.183	688.952	909.357	1337.74	1774.67	971.842	811.671	1446.04	1079.62	1063.6	1368.72	947.343	747.062	1387.88	1745.71	947.615	1316.71	1474.94	2089.37	1029.43	1716.33	2211.22	962.5
AP2B1	4895.15	4912.71	4242.42	4545.99	5350.88	4336.42	6890.54	4632.11	5361.89	7450.71	6657.47	2516.88	8115.4	5380.21	7171.99	4202.79	6400.72	4274.1	5631.2	2725.52	6165.62	6755.17	5440.88	8531.09	10724.3	3844.66	5952.58	5335.24	5485.38	4809.43	7000	7153.66	7856.76	6613.58	5594.11	4976.64	5114.06	5634.1	6129.25	7233.77	6752.38	3480.06	6114.85	6420.34	5141.11	8933.58	4692.81	2182.08	4865.38
AP2M1	5342.73	5739.17	3477.27	3018.93	3270.47	2506.17	5416.62	3689.63	3759.99	7720.64	4419.6	3684.42	4307.56	4527.08	5447.31	6389.77	6264.75	2977.76	4235.2	10091.5	4290.22	4639.31	2671.59	3991.85	4415.32	6079.83	3147.17	3469.56	3846.98	3829.25	5276.54	4729.69	4687	4541.13	2754.75	4734.59	5078.91	3875.9	4225.11	3838.1	4718.1	3716.97	4095.13	4824.73	4555.03	5646.79	4357.08	8316.1	3530.77
AP2S1	688.839	761.421	376.623	709.144	207.602	715.021	482.904	381.163	346.082	832.769	333.356	1445.45	345.138	727.083	529.572	789.999	1055.4	552.728	735.2	1986.09	533.123	417.241	175.075	488.277	479.279	798.274	279.835	273.744	177.388	276.415	533.52	367.659	245.8	376.604	247.413	683.971	482.783	428.178	576.376	322.944	397.143	540.266	552.204	510.596	556.914	465.66	380.135	1156.59	483.654
AP3B1	1120.63	1358.75	1290.04	1213.54	2576.02	812.757	1388.35	1136.54	1471.36	936.496	1243.94	884.416	1318.59	1147.92	1158.4	868.999	899.281	1162.72	1386.4	622.793	1505.52	1481.38	1299.04	1884.81	1262.16	858.684	1539.49	1512.94	1182.26	1083.96	1414.34	1444.09	1450.04	1626.42	1510.19	1655.42	1395.98	1991.92	1532.47	1597.4	1303.81	1112.59	1911.83	1435.05	1394.17	1654.34	865.227	357.611	1603.85
AP3B2	0	3.0017	1.0823	3.1991	1.462	0	1.5282	3.1606	0	1.1787	1.7545	0	0	0	0	3.95	0	2.4898	0.8	5.8855	2.3659	0	0	13.2518	0	0	0	0	1.9493	3.7736	1.8622	0.8045	0	0	0	1.9468	0.7174	0.892	1.2369	0	0	6.2549	0	0.9973	0	2.2642	1.3456	0	0
AP3D1	3164.6	3491.93	2761.9	2929.35	1843.57	2474.28	3255.01	2969.03	2666.67	4509.8	3369.53	1406.49	2774.43	2180.21	3748.47	2668.88	3408.63	2493.09	3164.8	3200.64	2799.68	3181.38	2832.16	2680.94	3100.9	3050.7	2044.29	2629.04	1989.28	2453.77	3461.82	3186.65	2824.05	2584.15	2111.05	2956.52	3134.15	2520	3138.53	2152.38	3942.86	2630.18	2946.64	3352.78	3713.08	2459.62	2240.44	4570.28	1989.42
AP3M1	1365.28	1728.96	2053.03	1492.94	2573.1	1051.44	2115	2002.53	2037.74	1408.58	1929.08	1035.06	1499.15	1640.62	1784.5	909.815	1382.73	1445.72	1748.8	1506.15	2025.24	1915.17	2078.66	2116.21	2338.74	1116.5	1974.52	2120.13	2238.79	1927.36	1430.17	2259.05	2515.47	2386.42	2412.01	1998.05	2059.54	2080.23	1990.72	2218.18	1560	1587.18	2348.03	1549.74	1882.41	2261.89	2020.43	1052.44	1767.31
AP3M2	210.823	357.197	406.926	287.923	394.737	228.395	329.322	597.345	613.293	376.602	496.525	138.961	317.154	297.917	485.384	167.216	309.353	335.288	489.6	210.808	667.981	588.276	276.639	285.423	448.649	211.435	795.61	446.441	385.965	452.83	257.914	358.809	278.515	258.868	418.782	479.559	540.889	264.043	481.756	298.701	337.143	362.783	145.012	259.287	393.227	741.132	580.631	310.269	102.885
AP3S1	1180.38	961.531	468.615	882.965	723.684	1666.67	506.59	523.388	497.705	437.307	386.868	1997.4	371.123	745.833	587.356	846.615	847.482	1135.33	1009.6	899.411	773.659	579.31	511.685	689.093	518.919	927.724	739.957	624.65	636.452	614.151	1011.17	601.77	579.134	631.698	477.69	657.365	675.753	884.009	625.232	731.602	777.143	779.515	827.146	1032.16	687.676	559.245	351.204	390.386	818.269
AP3S2	712.232	766.423	747.836	988.43	716.374	1006.17	981.853	812.895	779.194	741.412	893.92	459.74	662.291	942.708	701.564	718.899	755.892	730.331	811.152	1089.69	553.628	620.69	1019.5	840.979	1009.01	900.755	780.717	789.998	719.298	863.207	783.985	1101.37	908.727	893.585	915.751	718.021	730.99	751.095	728.51	876.191	645.324	620.798	964.037	848.377	745.061	809.811	866.431	746.905	965.971
AP4B1	1310.5	788.766	936.255	1369.1	1082.24	2285.96	671.305	918.394	744.484	746.12	905.298	222.675	644.135	606.385	673.29	1149.87	818.13	1506.73	880.192	857.689	741.506	741.966	502.254	508.247	592.784	314.671	607.407	1033.15	1030.06	924.849	816.536	820.177	939.77	998.853	772.305	1251.21	749.361	810.148	898.578	747.498	751	1803.38	711.462	748.442	768.946	867.147	1360.03	718.048	646.942
AP4E1	352.875	401.222	601.732	543.855	741.228	391.975	546.323	620.101	658.168	391.926	670.221	459.74	596.995	280.208	545.207	251.483	430.935	594.224	604	155.698	503.943	742.759	789.29	674.822	712.613	419.633	710.17	706.405	620.858	616.981	565.177	587.289	614.5	600.755	694.043	502.92	447.633	570.011	482.375	893.506	670.476	579.359	597.448	575.418	789.276	577.359	652.621	229.425	451.923
AP4M1	271.973	320.257	222.435	172.957	152.412	194.969	273.704	334.45	250.382	281.308	170.231	310.234	206.683	122.917	234.942	184.504	324.986	239.225	257.864	309.155	247.839	209.269	180.163	229.327	158.91	384.811	183.665	178.484	257.612	220.66	244.721	289.775	361.096	191.049	186.888	209.046	159.397	58.9726	272.152	183.065	297.2	225.379	197.877	149.658	235.814	70.6113	164.259	150.91	98.0769
AP4S1	258.174	350.193	172.078	181.285	178.363	153.292	209.36	187.105	144.824	106.085	278.089	303.896	113.935	280.208	142.76	93.4832	271.223	385.084	229.6	74.3713	169.558	122.069	195.388	202.854	177.477	173.679	357.437	233.325	306.043	182.076	251.397	233.306	404.951	335.094	268.834	200.519	168.58	200.708	140.383	288.312	303.81	170.446	193.736	233.358	263.406	241.509	283.251	169.701	201.923
APAF1	1024.8	1979.08	2022.73	1303.12	1216.37	2065.81	1842.98	2300.85	1994.22	1001.92	1703.62	2494.34	1750.34	1165.62	928.62	996.715	2094.24	1883.74	1812	760.3	1731.07	1806.9	935.348	1571.87	1223.42	1286.95	1941.6	2557.37	2187.13	1959.43	2355.68	2123.89	2949.6	2228.66	2373.35	1897.44	1557.39	2628.83	2694.49	2834.63	3138.09	1601.24	4273.78	2088.26	2703.67	1572.08	1841.47	1231.61	4469.23
APBA1	25.9301	14.0077	15.1515	17.0621	940.058	16.4609	3.0564	4.4248	2.0398	1166.94	9.6498	3.8961	0.6663	0	1659.42	119.817	71.223	83.8221	63.2	2.6752	24.4479	196.552	369.496	3.0581	3.6036	573.894	8.6224	2.7558	15.5945	6.6038	219.739	5.6315	3.5367	1.5094	42.8421	767.034	1345.05	737.714	2.4737	0.8658	624.762	1.5637	3.4803	151.583	4.7037	404.528	175.602	26.9483	2.8846
APBA2	50.7328	101.056	45.4545	58.651	68.7135	31.893	33.6199	85.335	72.752	465.007	524.597	6.4935	2.6652	48.9583	1770.22	129.033	62.5899	113.699	73.6	65.8106	118.296	114.483	1191.67	102.956	104.504	152.104	28.2187	11.0232	226.121	1119.81	21.4153	74.819	615.385	33.2075	11.7816	431.538	76.7575	6.2443	7.4212	65.8009	120	100.86	98.6079	110.696	125.118	9.8113	377.443	75.7465	23.0769
APBA3	192.785	302.167	330.087	195.148	80.4094	118.313	210.888	381.163	388.917	586.415	337.742	611.688	189.226	176.042	274.643	290.983	471.223	237.358	204	438.202	302.05	295.172	221.504	150.867	230.631	353.83	204.585	191.069	238.791	206.604	219.739	279.163	250.221	249.811	147.805	221.285	292.683	173.947	233.148	140.26	238.095	247.068	146.172	189.479	291.627	261.887	271.14	663.511	152.885
APBB1	33.8219	79.0437	73.5931	28.7923	13.1579	27.7778	29.7994	38.5588	40.1156	90.1724	289.493	23.3766	3.3314	30.2083	19.0347	17.1166	39.5683	138.597	63.2	90.9577	140.379	55.8621	30.9526	45.8716	77.4775	26.9687	30.5703	9.186	97.4659	37.7358	18.622	65.1649	21.2202	6.7925	7.4974	36.34	10.7604	7.1363	5.5659	3.4632	80.9524	50.821	10.4408	81.7751	73.3772	7.5472	259.03	53.1682	12.5
APBB1IP	1877.11	2245.24	4030.3	3455.08	3583.33	1732.51	3413.94	3089.76	3546.49	2966.85	3304.61	4188.31	3054.94	3201.04	2673.01	2686	1620.14	1458.17	2344.8	2247.19	3820.98	3528.28	3027.55	4059.12	1976.58	6937.43	4353.52	2917.48	2833.33	1918.87	1273.74	3012.07	2884.17	3315.47	3586.96	2892.28	2707.32	3502.14	2877.55	3159.31	1778.1	3086.79	4294.66	1576.66	1512.7	1728.3	2759.17	4235.25	4398.08
APBB2	142.052	11.0061	20.5628	92.7753	2.924	57.6132	4.5845	9.4817	1.3599	14.1447	5.2635	10.3896	0.6663	2.0833	38.7492	0	11.5108	68.8835	224.8	5.3505	14.9842	0.6897	2.9018	38.736	4.5045	0	9.4062	15.6162	22.4172	8.4906	254.19	5.6315	13.2626	13.5849	7.4974	12.9786	7.1736	27.6531	8.0396	2.5974	93.3333	10.9461	32.4826	110.696	5.6444	8.3019	55.17	63.3649	0
APBB3	774.521	1115.62	402.597	1147.43	548.246	1133.74	680.038	888.748	864.865	1158.1	928.133	696.104	545.024	322.917	577.838	466.099	1439.57	1154.42	822.4	2601.39	909.306	893.103	404.318	144.75	654.054	339.806	493.827	857.056	468.811	837.736	822.16	608.206	910.698	713.207	711.18	759.247	881.636	353.247	755.102	365.368	733.333	777.952	327.146	782.847	796.802	518.491	490.475	1165.33	480.769
APC	1224.35	924.511	1583.33	1607.04	2972.22	1013.37	1311.17	1224.4	1415.6	798.586	1269.38	490.909	1186.66	547.917	1167.23	961.165	848.201	1302.98	1599.2	288.389	1339.91	1507.59	1507.97	1862.39	2337.84	914.779	1543.41	1885.89	2723.2	1487.74	1253.26	1650.84	1656.94	1313.96	1580.88	1199.87	1146.34	1983	1013.61	1608.66	1574.29	1294.76	2309.74	1375.22	1772.34	2187.92	1142.42	425.346	1469.23
APC2	98.0834	288.61	370.963	276.694	139.254	89.7531	137.398	110.019	154.091	115.892	290.608	31.4156	59.926	60.4167	115.921	289.93	87.4532	91.225	128.872	41.6319	229.172	129.172	154.84	121.132	1292.01	66.9256	141.869	115.487	166.823	141.821	139.06	526.71	115.5	98.0906	147.184	113.777	180.136	104.752	132.437	75.9134	236.219	141.861	308.248	175.767	327.131	149.358	149.417	298.42	203.01
APCDD1	65.389	74.0409	10.8225	6.3983	23.3918	46.2963	0	0.6321	0	134.375	1.7545	55.8442	7.3292	2.0833	50.3059	7.9	184.892	73.8631	1.6	1.0701	0	1.3793	11.6072	0	0	1.0787	1.5677	2.7558	7.7973	0	21.4153	0	0	2.2642	1.0711	234.912	156.385	12.4885	19.1713	0.8658	176.19	1.5637	4.6404	44.8766	29.1627	0	2.6912	1.4567	9.6154
APEH	1400.23	1741.96	1083.33	1503.6	1026.32	1112.14	1823.88	1604.93	1646.1	2547.81	1784.33	579.221	1318.59	1597.92	2091.09	1724.83	1669.78	1000.89	1448	1395.4	1875.39	1788.97	897.624	1832.82	2299.1	2452	1106.02	1259.4	1131.58	1427.36	1296.09	1725.66	1292.66	1448.3	1162.09	1309.54	1406.74	1130.21	1739.02	1384.42	1465.71	1270.52	1696.06	1111.94	1178.74	1395.47	1258.82	2343.77	916.346
APEX1	5263.81	5916.27	3707.79	5086.64	4479.53	4524.69	6622.35	5713.02	5220.47	7154.27	5138.95	3298.7	5821.37	9359.38	4726.72	6541.19	4386.33	5136.39	4100.8	6553.77	7749.21	5822.76	4811.19	7564.73	5200.9	6072.28	4064.28	4379.9	10246.6	5347.17	5551.21	4965.41	4461.54	5321.51	4727.63	7342.63	4822.09	4827.7	5574.52	4821.65	5326.67	6781.08	2880.51	4124.66	1729.07	6226.42	4268.27	7214.13	1909.62
APEX2	323.563	505.279	450.216	420.155	298.246	400.206	687.679	618.837	527.622	856.343	498.279	590.909	393.111	607.292	731.475	388.416	717.986	361.846	460.8	432.317	529.968	600.69	386.907	511.723	809.91	789.644	423.28	539.22	422.027	476.415	389.199	658.89	518.126	451.321	425.208	556.781	682.927	548.603	666.048	345.454	427.619	598.124	530.162	364.996	485.419	479.245	503.258	1361.25	398.077
APH1A	2268.32	1936.07	1715.37	1450.28	1402.05	1948.56	2169.25	1872.95	1698.45	2142.33	2026.45	9101.3	2046.17	2591.67	2257.65	2682.05	1989.93	1776.03	2060	3082.93	2207.41	2215.17	1837.81	1905.2	1690.09	4040.99	1958.06	1398.11	1949.32	1831.13	2528.86	1997.59	2063.66	1823.4	1606.58	2125.24	1954.81	2027.6	2198.52	1780.09	2080.95	1974.2	2069.61	2233.86	1793.04	1712.45	2263.32	3261.47	1513.46
APH1B	798.196	791.437	617.965	839.243	793.86	910.494	753.391	668.142	741.798	575.217	613.2	616.883	500.383	656.25	698.844	239.633	925.899	1172.68	994.4	362.226	895.899	708.276	911.166	708.461	599.099	664.509	968.842	863.486	883.041	580.189	937.616	714.401	920.424	854.34	998.222	761.194	955.524	693.113	604.205	788.745	1013.33	491.009	1164.73	828.721	855.127	527.547	554.391	262.2	546.154
API5	1435.17	1701.94	2067.1	1582.51	2767.54	1877.57	2636.1	2056.26	2322.62	1768.68	2405.43	1441.56	1813.64	2406.25	2597.55	1080.98	1554.68	1981.85	1817.6	902.087	2418.77	2283.45	2650.31	3084.61	2765.77	988.134	2980.99	2337.84	2640.35	2118.87	1914.34	2695.9	2384.62	2484.53	2643.36	2427	2623.39	2196.19	2596.78	2600.87	2122.86	1979.67	2299.3	1833.96	1583.25	2418.87	4807.86	1150.04	2143.27
APIP	292.751	262.815	245.671	109.837	337.719	312.757	301.509	351.846	248.982	285.452	230.34	928.364	239.611	481.25	427.641	348.6	174.094	472.209	297.592	259.984	379.085	246.207	426.565	383.282	432.73	282.255	324.515	270.988	411.306	339.255	286.099	228.48	206.481	341.592	376.668	423.589	384.512	350.784	428.639	378.069	223.476	502.291	335.267	241.336	163.688	251.321	526.302	189.366	400.962
APITD1	121.06	159.428	165.963	82.2394	79.3421	103.261	143.778	184.026	91.2528	82.3516	94.2608	125.312	85.6115	191.771	195.833	173.563	109.576	116.969	149.2	59.1118	110.181	102.2	167.386	97.7574	113.531	82.4595	166.874	171.76	152.008	133.33	106.769	153.813	104.173	136.106	166.785	141.097	126.499	99.4086	166.667	139.281	124.648	186.083	109.397	84.4677	78.0715	123.955	144.034	90.2039	10.5769
APLF	164.6	166.092	106.061	113.037	470.76	121.399	125.31	158.66	127.826	103.138	173.696	212.987	131.259	160.417	157.036	100.067	141.727	137.767	100	81.862	201.104	145.517	176.043	163.099	221.622	111.111	211.64	229.485	184.21	158.491	134.078	167.715	244.916	132.83	231.562	151.454	142.755	115.073	137.91	273.593	104.295	141.517	157.773	126.652	150.517	138.377	101.856	32.7749	117.308
APLN	10.1466	17.0094	3.2468	13.863	1.462	17.4897	2.2923	1.8963	6.7993	11.7872	2.6318	9.0909	229.87	0	48.2665	2.6333	5.7554	8.2992	2.4	4.2804	1.5773	2.069	24.1817	6.1162	0.9009	9.7087	7.8385	7.3488	5.848	4.717	11.1732	5.6315	3.5367	1.5094	3.2132	4.5425	1.4347	2.6761	6.8027	2.5974	4.7619	3.1274	5.8005	11.9671	2.8222	0.7547	4.0368	9.4683	0
APLNR	47.3506	3.0017	8.658	75.7131	0	241.769	9.1691	5.0569	0	30.0575	5.2635	41.5584	0	0	52.3453	0	0	19.0882	0	0	0.7886	0	0	16.3099	9.9099	12.945	0.7839	45.9301	33.1384	0.9434	120.112	1.609	3.5367	0	4.2842	3.2446	7.891	3.5681	10.5133	1.7316	73.3333	3.9093	54.5244	33.9068	0	0	12.7833	5.8267	0.9615
APLP2	21693.3	5543.06	16310.6	17662.5	5282.16	24014.4	6455.01	10598	17164.7	14114	6448.68	5970.13	20300.5	7715.62	9124.41	21656.5	10261.2	6440.19	15568.8	11161	18233.4	17191.7	7651.09	14528	7096.4	5432.58	5862.43	12839.3	8005.85	9960.38	17842.6	13354	8871.79	10609.1	15459.6	13316.7	17289.8	31598.6	13966.6	8970.56	12355.2	16122	21156.6	8445.77	11080.9	3766.79	10629	3066.28	17819.2
APOA1BP	594.138	408.226	570.346	513.996	488.304	768.519	628.08	636.536	368.519	762.634	579.864	1032.47	434.421	1287.5	673.691	1435.16	650.36	515.382	413.6	1426.43	544.164	462.759	407.22	566.769	576.577	901.834	456.202	624.65	602.339	595.283	480.447	674.98	476.569	563.019	410.214	687.865	568.149	415.689	784.787	503.896	427.619	853.01	545.244	369.983	363.123	378.868	646.566	1126.73	391.346
APOB	2.2548	2.0011	2.1645	1.0664	64.3275	0	4.5845	3.7927	0	18.8596	1.7545	0	0	0	16.9952	0	0	3.3197	0	0	22.082	0	0	31.6004	2.7027	1.0787	10.1901	5.5116	0	0	27.0019	0	0.8842	0	1.0711	6.4893	3.5868	3.5681	1.2369	0	29.5238	0.7819	5.8005	2.9918	0	0	49.7876	0	0
APOB48R	1217.59	1099.61	690.476	926.686	1935.67	1962.96	313.276	492.415	918.579	2802.42	584.25	536.364	1407.87	1059.38	1203.26	1479.93	3094.24	812.494	116.8	3864.63	428.233	620.69	1260.35	469.929	346.847	1280.47	1438.37	1388.93	1195.91	600	806.332	399.839	1032.71	612.83	232.419	2245.94	1928.98	1893.79	812.616	1419.05	1551.43	584.832	2813.23	1348.29	3699.91	1655.85	1340.23	1733.43	2894.23
APOBEC2	42.841	27.0149	55.1948	103.439	92.1053	45.2675	22.1585	40.4551	46.2349	18.2702	52.6352	12.987	27.9841	62.5	44.8674	75.0499	28.777	42.326	23.2	15.5163	48.1073	23.4483	91.8904	34.6585	37.8378	30.205	47.815	38.5813	79.922	38.6792	33.5196	32.9847	29.1777	24.1509	59.979	30.4997	31.5638	23.193	18.5529	38.961	35.2381	34.4019	47.5638	26.926	35.7479	18.8679	43.7323	20.3933	4.8077
APOBEC3A	101.466	54.0299	16.2338	14.3215	7.3099	605.967	8.5883	12.4463	5.0382	18.2702	13.1588	5.7922	6.6629	74.4271	14.2284	163.266	162.014	310.142	57.984	515.249	25.142	20.1931	3.8691	15.2905	30.6306	5.3937	0	64.6788	40.9357	8.4906	133.147	23.3307	1.7683	58.1132	3.2453	31.1486	58.1062	41.9257	26.2894	9.5238	110.476	85.4105	539.037	119.97	110.066	43.9019	88.8102	16.0233	196.154
APOBEC3B	114.994	168.093	245.671	174.428	43.8596	19.5473	281.001	219.539	241.775	294.681	71.9347	100.701	44.6414	105.781	492.91	310.733	78.9928	57.5136	10.016	117.71	154.669	182.565	119.941	352.701	540.54	343.042	94.8462	252.239	131.579	111.321	124.767	201.931	17.6835	207.547	126.352	198.572	243.185	191.788	158.621	141.125	151.429	501.767	387.877	38.5939	115.71	24.7774	170.892	78.6599	50.9615
APOBEC3C	829.763	1071.59	783.55	740.069	875.731	931.07	1082.71	795.828	1168.79	1904.23	1164.11	980.519	1198.65	1498.96	1707.68	1221.86	1327.34	592.564	940.8	1341.36	1388.01	1195.17	718.68	1518.86	2098.2	2869.47	1010.39	712.836	677.388	622.641	793.296	1363.64	1012.38	987.17	862.198	1223.23	1302.73	925.042	1199.75	1056.28	834.286	1019.55	1563.81	727.001	747.883	882.264	2786.76	1474.87	1167.31
APOBEC3D	122.886	225.124	379.87	206.878	207.602	108.025	395.033	527.813	512.664	340.062	442.135	725.974	300.496	391.667	437.797	391.049	123.022	312.051	174.4	170.679	371.451	340.69	500.077	222.222	317.117	814.455	402.116	272.825	355.75	357.547	207.635	479.485	328.028	412.075	274.19	342.635	253.946	372.871	254.174	339.394	223.81	501.955	189.095	144.602	200.376	529.057	966.148	565.914	230.769
APOBEC3F	280.721	476.263	660.173	368.968	736.842	259.259	669.341	766.751	774.435	556.947	664.08	916.883	682.946	584.375	837.525	568.799	293.525	434.879	495.2	130.016	695.584	601.379	1318.39	426.096	428.829	1937.43	741.525	457.464	713.45	597.17	413.408	580.853	671.087	464.151	759.377	561.324	567.432	717.198	444.651	658.009	414.286	577.795	335.267	400.897	351.834	1034.72	1416.93	854.334	636.538
APOBEC3G	233.371	582.322	413.42	282.591	695.906	185.185	542.502	507.585	776.475	720.2	749.174	236.364	647.633	527.083	1049.63	539.832	420.863	391.723	488	242.911	747.634	695.172	1024.34	457.696	415.315	687.163	636.488	406.941	629.63	473.585	404.097	664.521	549.072	456.604	544.095	706.684	640.603	454.047	489.796	472.727	543.809	596.56	479.118	312.142	340.546	800	2189.31	456.664	528.846
APOBEC3H	3.3822	18.01	18.3983	0	20.4678	0	74.1165	17.6991	15.6383	36.5404	29.8266	46.7532	17.9898	52.0833	91.7743	11.85	9.3525	4.1496	5.6	33.7079	22.082	23.4483	48.3634	16.3099	16.2162	19.4175	6.2708	9.186	8.7719	14.1509	0.9311	53.9019	24.7569	14.3396	31.0606	16.2232	9.3257	0.892	70.5009	8.658	10.4762	33.62	46.4037	3.989	2.8222	56.6038	56.5156	5.8267	16.3462
APOC1	12.4014	0	7.5758	8.5311	1.462	30.8642	25.2149	12.6422	2.0398	87.2256	61.4077	175.325	0	9.375	128.484	1.3167	0	33.1969	0.8	0.535	1.5773	0.6897	0	94.8012	845.946	1.0787	11.7578	2.7558	0	0	11.1732	37.8117	0	1.5094	1.0711	32.4465	10.043	0	0.6184	91.7749	20	2.3456	238.979	6.9808	0	1.5094	3.364	2.9133	0
APOC2	2267.19	400.221	2.1645	890.429	112.573	1066.87	8.405	6.3211	20.3978	249.3	145.624	7.7922	1.3326	293.75	129.844	3.95	952.518	252.296	85.6	1811.13	11.8297	0	0.9673	7.1356	36.9369	49.6224	1.5677	345.395	106.238	259.434	729.05	178.6	44.2087	16.6038	57.8369	201.817	33.7159	0.892	38.961	412.121	194.286	7.8186	669.374	186.487	47.0367	0	0	0	49.0385
APOD	1.1274	1.0006	8.658	1.0664	0	2.0576	6.1127	1.8963	0	2.9468	0.8773	5.1948	0	0	16.3154	0	0.7194	0	0	0	22.082	0	0.9673	12.2324	6.3063	3.2362	12.5416	4.593	1.9493	3.7736	17.6909	0.8045	0	6.7925	0	11.0318	5.0215	0	3.7106	0	3.8095	3.1274	5.8005	0.9973	0.9407	27.9245	16.8201	0	0
APOE	402.48	21.0116	107.143	153.559	5.848	237.654	119.962	68.268	14.9584	316.487	34.2129	159.74	9.9943	4.1667	574.439	123.766	3.5971	52.2851	12.8	85.6073	50.4732	4.1379	7.7381	53.0071	106.306	18.3387	210.856	71.651	9.7466	9.434	421.788	72.4055	7.9576	3.0189	12.8526	66.1908	52.3673	23.193	21.0266	45.8874	296.19	27.3651	177.494	149.589	5.6444	16.6038	88.8102	69.9199	0
APOL1	280.721	185.102	331.169	320.981	454.678	727.366	648.711	225.032	313.445	367.173	394.764	231.169	418.43	555.208	411.285	366.033	233.813	284.663	194.4	233.815	250.789	259.31	510.717	448.522	363.964	665.588	354.301	307.732	258.285	238.679	289.572	744.167	469.496	846.038	320.245	431.538	468.436	332.73	400.742	413.853	424.762	359.656	412.993	364.996	222.013	443.774	668.768	496.723	360.577
APOL2	270.575	364.201	319.264	234.604	530.702	692.387	488.252	529.077	529.662	490.939	460.558	244.156	660.959	697.917	526.852	315.999	313.669	541.939	328	490.637	395.11	415.862	481.699	349.643	348.649	597.627	495.395	416.127	367.446	384.906	322.16	418.343	403.183	559.245	277.403	548.345	517.217	354.139	429.808	317.749	409.524	502.736	296.984	322.114	419.567	489.057	779.781	463.948	498.077
APOL3	51.8602	113.062	68.1818	68.2485	337.719	102.881	529.513	112.516	531.702	373.656	487.752	33.7662	644.968	655.208	522.094	101.383	87.7698	248.977	96	475.655	383.281	318.621	413.023	170.234	239.64	466.019	197.531	147.895	69.2008	133.962	59.5903	371.681	294.43	544.151	197.074	451.655	483.501	198.032	486.704	319.481	208.571	168.882	365.429	102.718	173.095	717.736	658.003	472.688	550
APOL4	11.274	371.205	49.7835	28.7923	14.6199	46.2963	336.199	324.905	4.0796	50.0958	42.9854	25.974	0.6663	212.5	144.12	17.1166	4.3165	82.1623	279.2	1.0701	14.9842	7.5862	8.7054	647.299	253.153	16.1812	20.3802	351.825	1107.21	1318.87	41.8994	1790.02	1454.47	947.924	1149.24	86.3076	34.4333	0.892	207.792	48.4848	149.524	6.2549	204.176	195.463	339.605	9.0566	331.02	5.0983	34.6154
APOL6	649.38	1318.73	1323.59	1441.75	2346.49	1307.61	2651.38	1345.76	2982.15	1303.08	2638.78	1031.17	1822.97	2358.33	1756.63	1715.61	1253.96	1726.24	1624.8	1353.67	2627.76	1983.45	4460.07	1573.9	1666.67	2791.8	2302.18	2361.73	2601.36	2105.66	1425.51	2908.29	2391.69	2531.32	2157.1	2007.14	1991.39	1959.8	1516.39	1744.59	1110.48	1790.46	1951.28	2487.16	2219.19	2196.98	4027.41	1503.28	2728.85
APOLD1	304.228	258.683	254.881	811.517	419.591	116.255	925.479	189.292	86.1669	122.475	404.791	111.688	125.362	337.5	316.111	95.2738	89.9281	246.487	286.424	9.8555	42.5868	63.4483	337.576	337.411	369.73	221.143	87.7915	274.662	255.361	474.623	304.544	551.303	282.935	510.287	1313.22	125.075	329.562	112.013	263.581	549.896	204.762	479.312	377.552	215.408	197.178	142.174	117.068	164.086	300
APOM	19.1657	26.0444	28.1385	8.5311	2.924	4.1152	16.0458	27.8445	16.3454	32.4149	21.0541	33.7662	15.9909	31.25	29.2658	44.7666	19.4245	28.2173	12.8	47.619	17.3502	9.6552	4.846	15.2905	24.3243	24.8112	5.487	15.6254	1.9493	16.0377	29.7952	12.8721	1.7683	25.6604	16.0658	18.8189	26.5423	5.3522	21.0266	19.0476	8.5714	21.8921	15.0812	6.9808	15.0517	9.8113	15.4745	17.48	0
APOO	85.6821	87.0481	88.7446	61.8502	54.0936	51.4403	86.3419	75.2212	76.8315	70.1341	77.1982	153.247	61.9649	98.9583	134.602	132.983	71.223	75.5229	78.4	41.1985	83.5962	41.3793	41.5925	69.317	128.829	67.9612	40.7603	97.3719	129.63	129.245	58.6592	113.435	59.2396	97.3585	63.1922	116.807	58.8235	78.4992	103.278	58.0087	46.6667	129.007	80.0464	65.819	52.6811	54.3396	60.5524	62.6366	19.2308
APOOL	182.638	257.142	287.879	272.994	369.883	177.983	361.414	281.922	272.65	283.483	240.367	653.247	257.188	233.333	225.017	130.35	371.223	249.806	284.8	87.2124	208.202	306.207	405.285	560.652	450.45	309.601	387.223	343.557	459.064	338.679	225.326	307.321	224.58	347.17	324.529	242.051	256.098	385.36	197.897	359.307	289.524	265.051	378.19	268.262	225.776	314.717	211.261	252.003	285.577
APP	2777.9	1261.7	111.472	3608.64	266.082	1313.79	2185.29	74.5891	1304.1	5463.98	2769.49	59.7403	6167.17	32.2917	552.685	88.2165	2000.72	385.084	5124	15.5163	6450.32	4918.62	4462.97	1115.19	785.586	8.63	5885.95	88.1859	10.7212	68.8679	8221.6	743.363	1042.44	210.566	1856.14	3991.56	3617.65	7005.16	21.0266	5.1948	4400	234.558	288.863	3892.3	1216.37	8470.94	4074.51	6701.38	82.6923
APPBP2	737.317	801.443	1084.42	990.669	1425.44	834.362	1408.21	1084.07	1171.51	710.181	1151.83	1551.95	810.207	789.583	940.857	367.349	712.23	1145.29	1183.2	325.843	1120.66	1036.55	1428.65	1022.43	994.595	677.454	1329.41	1164.79	1343.08	1043.4	1040.04	1160.1	1415.56	1108.68	1591.59	960.415	1156.38	1246.18	897.341	1356.71	1244.76	835.027	976.798	859.636	783.631	1204.53	1018.63	598.689	732.692
APPL1	2477.91	1545.85	3168.83	2892.03	3755.85	2525.72	3354.35	2415.3	3454.02	1987.92	3201.09	2538.96	3399.41	2594.79	2507.82	2107.98	1394.24	2290.58	2108	1332.8	2839.91	3389.66	2975.32	3977.57	1672.97	2069.04	3348.62	3485.18	3424.95	2253.77	2475.79	2893.81	3068.97	3526.79	3937.19	2996.76	3768.29	4563.66	3155.84	4458.01	2214.29	2577.8	2395.59	2251.81	1744.12	2975.09	2561.37	1739.26	1881.73
APPL2	588.501	629.348	793.29	552.386	802.632	638.889	539.446	792.668	573.177	575.217	638.64	729.87	868.175	364.583	635.622	678.082	625.899	951.92	672.8	542.536	455.836	373.103	617.117	491.335	950.451	316.073	1355.28	646.696	590.643	675.472	768.156	576.83	581.786	535.094	654.414	671.642	558.823	404.985	672.851	834.632	709.524	800.625	766.821	801.795	487.3	736.604	701.063	470.502	429.808
APRT	1404.74	1477.82	719.697	1074.91	523.392	910.494	809.933	764.222	873.704	1439.22	750.928	1862.34	768.898	1653.12	836.846	1475.98	1513.67	930.343	1065.6	2160.51	1162.46	916.552	454.616	1040.77	839.64	1553.4	491.476	710.08	583.821	615.094	827.747	915.527	635.721	899.623	501.253	962.362	785.509	512.029	1097.71	580.087	709.524	858.483	733.179	935.428	607.714	740.377	585.34	794.61	609.615
APTX	270.575	308.17	281.385	322.048	305.556	374.486	470.678	403.287	424.953	257.551	392.132	149.351	229.87	307.292	294.358	200.133	232.374	377.615	334.4	460.139	365.931	336.552	360.791	406.728	439.64	203.883	327.65	293.953	393.762	372.642	296.089	382.945	361.627	468.679	389.863	327.709	388.092	277.423	379.097	362.771	239.048	380.766	314.385	251.309	234.243	357.736	312.854	221.413	133.654
AQP1	93.5738	47.026	57.3593	424.42	23.3918	289.095	314.04	180.152	19.0379	1515.84	92.1115	36.3636	1.9989	104.167	1624.07	48.7166	28.0576	169.304	174.4	108.079	15.7729	30.3448	13.5417	402.65	450.45	1129.45	54.0858	83.5928	27.0663	35.8491	80.0745	123.894	113.174	150.943	145.663	98.7541	147.059	11.5965	30.303	73.5931	246.667	35.9656	361.949	55.8464	268.109	51.3208	736.721	74.2899	16.3462
AQP11	68.7711	48.0265	66.0173	83.1778	58.4795	24.6914	45.0812	55.6258	42.1554	26.5213	62.2849	57.1429	23.3201	4.1667	43.5078	15.8	25.1799	33.1969	64	13.9112	43.3754	31.7241	12.5745	59.1233	36.036	32.3625	73.6821	84.5114	70.1754	50	48.4171	53.0973	54.8187	35.4717	62.1211	45.425	42.3242	37.4655	43.9085	71.8615	57.1429	51.6028	24.3619	52.8546	52.6811	34.717	23.5482	61.1799	31.7308
AQP3	409.245	1269.7	163.42	238.87	19.0058	324.074	1315	298.356	69.3524	84.2788	898.307	419.481	24.6527	579.167	50.9857	86.8998	1400.72	668.087	1255.2	107.009	126.972	136.552	106.399	610.601	1042.34	91.6936	50.9504	173.616	82.846	305.66	470.205	703.138	728.559	519.245	111.39	67.4886	35.1506	213.197	150.897	48.4848	571.429	299.453	349.188	943.406	1523.99	41.5094	499.221	351.784	55.7692
AQP6	1.1274	0	8.658	6.3983	0	0	5.3486	1.2642	35.3561	3.5362	2.6318	3.8961	3.3314	0	2.0394	3.95	0	1.6598	4.8	0	38.6435	28.9655	0	2.0387	0	73.3549	0	4.593	8.7719	1.8868	3.7244	14.4811	8.8417	27.1698	16.0658	1.2979	2.1521	0.892	1.8553	4.329	8.5714	0	17.4014	0.9973	1.8815	3.0189	1.3456	0	0
AQP7P1	1.1274	0	2.1645	0	54.0936	0	13.7536	0	0	0	0	0	0	10.4167	0	7.9	0	0	0	0.535	5.5205	4.1379	37.7234	10.1937	2.7027	39.9137	11.7578	52.3603	1.9493	0	0	0.8045	61.8921	2.2642	18.2079	10.3829	0	0	42.6716	7.7922	0	0	0	0.9973	0	74.717	0	17.48	0
AQP9	9.0192	1.0006	2.1645	9.5974	10.2339	17.4897	0.7641	0.6321	51.6743	9.4298	11.4043	0	51.3043	179.167	19.0347	263.333	6.4748	11.6189	9.6	528.09	77.2871	88.9655	1.9345	8.1549	14.4144	14.0237	0	23.8837	33.1384	2.8302	4.6555	32.9847	7.0734	21.8868	0	18.8189	129.842	112.397	20.4082	19.0476	19.0476	215.794	424.594	2.9918	99.7178	55.8491	33.6402	8.74	2056.73
AQR	1016.91	1029.57	1346.32	1399.09	2491.23	736.625	1772.68	1262.33	1608.02	1079.12	1550.11	532.467	1279.28	709.375	1388.85	558.266	1001.44	1078.9	1241.6	727.127	1417.98	1691.72	1538.92	1969.42	1971.17	631.068	1446.99	1666.35	1471.73	1119.81	1225.33	1632.34	1512.82	1668.68	1637.64	1465.28	1459.83	1536.09	1376.62	1283.12	1617.14	962.471	1727.38	1303.42	1349.95	1473.21	1523.23	858.704	1092.31
AR	226.607	339.187	17.316	45.8544	0	64.8148	114.613	122.63	12.9186	1.1787	20.1768	16.8831	558.35	0	0.6798	2.6333	254.676	193.372	290.4	1.0701	4.7319	6.2069	2.9018	231.397	5.4054	7.5512	565.158	0.9186	6.8226	144.34	417.132	0	0.8842	0.7547	25.7053	5.1914	0	65.1187	0.6184	1.7316	21.9048	3.9093	2.3202	428.821	259.642	1.5094	1.3456	56.0816	13.4615
ARAF	1746.34	1817	1648.27	1662.49	827.485	1155.35	1419.68	1554.99	1359.85	2817.74	1381.67	2524.68	1489.82	1335.42	1616.59	1973.68	2620.14	1450.7	1611.2	5269.13	1522.08	1795.86	1277.76	984.71	1063.96	2425.03	1080.15	1200.61	858.674	1332.08	1782.12	1505.23	1288.24	1365.28	894.33	1601.56	1535.15	1555.71	1436.61	1137.66	1450.48	1551.99	1317.87	1866.87	1738.48	1313.21	1178.75	2849.24	1289.42
ARAP1	1290.72	1727.77	2646.75	2679.78	2093.71	2051.41	2645.21	2655.85	3422.53	4196.29	3062.53	926.792	2881.48	2114	3024.2	3358.19	2169.94	1633.07	1854.57	7074.04	2794.79	2703.08	2120.05	1543.32	1999.41	3736.79	2073.21	2542.85	2341.13	2137.58	2201.79	2811.21	3282.33	2984.15	1934.07	3208.25	3508.02	3042.45	2690.98	2249.56	2365.43	2419.03	5426.67	1587.34	3747.47	3395.12	4740.27	7945.02	6260.58
ARAP2	564.825	420.232	136.364	695.281	2545.32	347.737	803.82	149.178	1543.43	500.368	1412.38	529.87	1538.46	337.5	685.248	78.9999	544.604	504.593	712	367.576	1163.25	1535.17	2154.11	574.923	988.288	839.266	833.235	696.301	33.1384	69.8113	969.274	526.951	392.573	1171.32	965.019	937.054	835.725	1185.52	1124.3	1207.79	1180	397.185	454.756	1452.01	571.966	2917.74	2000.25	852.149	719.231
ARAP3	317.926	151.083	5.4113	1541.99	5.848	1518.52	4.5845	3.1606	384.158	35.3617	30.7038	2.5974	893.494	35.4167	35.3501	188.283	1138.13	719.542	374.4	387.908	215.3	94.4828	0.9673	20.3874	18.018	84.1424	45.4635	18.3721	4.8733	18.8679	726.257	14.4811	8.8417	11.3208	1.0711	60.9994	137.016	115.965	58.7508	15.5844	319.048	30.4926	441.995	608.327	920.038	186.415	67.9533	1410.78	566.346
ARC	5.637	7.0039	3.2468	4.2655	0	1.0288	16.0458	7.5853	235.934	1.1787	14.036	14.2857	93.2805	15.625	0	30.2833	0	1.6598	101.6	38.5233	51.2618	62.7586	0	0	1.8018	395.901	4.7031	9.186	2.924	14.1509	2.7933	8.0451	18.5676	12.8302	11.7816	0.6489	0	5.3522	9.8949	12.987	4.7619	9.3823	3.4803	41.8848	4.7037	70.9434	8.0737	117.261	19.2308
ARCN1	2051.86	2930.62	2063.85	2026.13	2551.17	2260.29	2913.47	1565.11	2595.95	2208.34	2580	1449.35	2210.75	2568.75	2373.22	1281.11	2428.78	2707.21	3419.2	918.673	3217.67	3091.72	1942.27	2689.09	3070.27	2081.98	2896.34	2658.44	2969.79	2487.74	3419.93	2741.75	2673.74	2625.66	2561.96	2745.62	2802.01	2907.15	2917.75	2909.96	3340.95	2106.33	3517.4	3584.14	2265.29	2812.83	4628.9	1947.56	3291.35
AREG	9.0192	0	7.5758	4.2655	331.871	0	177.268	0.6321	4.0796	254.604	7.8953	28.5714	0	297.917	242.692	151.416	1.4388	1.6598	0	390.583	108.833	80.6897	2.9018	11.213	439.64	75.5124	138.742	401.429	76.0234	44.3396	9.311	18.5036	4.4209	571.321	3.2132	56.4568	20.0861	941.991	489.178	1.7316	3.8095	544.175	3.4803	2.9918	1.8815	11066.4	94.1927	695.557	127.885
ARF1	7178.13	8380.63	5006.49	5046.12	3355.26	5123.46	5437.25	3812.9	5020.57	8284.07	4135.37	4933.77	6111.87	4597.92	5851.8	9979	9302.16	5554.67	7111.2	19769.9	6492.11	5534.48	3416.39	4246.69	4164.86	9610.57	4447.58	3716.67	3679.34	4607.55	8731.84	4603.38	4345.71	4170.57	2906.84	5523.69	5035.15	5981.11	6279.53	3717.75	7086.67	4577.01	5525.52	9448.02	8150.52	5139.62	5693.95	9954.84	4565.38
ARF3	5190.53	4293.37	5082.25	4575.85	5906.43	3770.58	6056.16	5389.38	2767.98	6423.46	4236.25	18992.2	4538.1	4810.42	5029.91	3328.53	4112.23	2488.11	3297.6	3464.95	4017.35	4618.62	5056.88	5031.6	3725.23	9990.29	3917.7	4631.59	4165.69	6559.43	4654.56	4934.84	5851.46	3984.91	4673.01	4719.66	6207.32	6917.75	6421.77	5728.14	3349.52	3017.2	5092.81	4315.13	4738.48	6230.94	4734.53	9780.04	6187.5
ARF4	2621.2	2601.44	1608.23	1740.34	1777.78	2650.21	1382.23	1395.07	1575.39	1305.44	1141.31	4257.14	1249.96	2156.25	1658.06	2584.61	2209.35	3098.93	2394.4	1303.91	2214.51	1601.38	2113.48	2271.15	3056.76	2236.25	1476.78	1616.74	2496.1	2073.58	3183.43	1796.46	1335.99	1523.02	1572.31	2077.22	1522.96	1687.73	1322.82	1830.3	2396.19	1972.63	2921.11	2715.53	1949.2	1314.72	1585.13	833.212	1846.15
ARF5	1555.12	1301.68	954.978	1288.77	632.924	1620.24	822.563	995.986	751.27	1661.36	877.033	3974.62	979.218	1453.73	907.967	1800.59	2254.96	993.558	598.984	2987.52	923.352	962.586	558.887	857.288	660.153	1268.52	892.659	773.73	769.669	939.528	1144.23	970.861	891.158	922.128	644.432	1116.5	1063.05	377.242	1265.52	700.043	1191.26	1081.67	860.418	1307.2	1772.07	460.377	938.381	971.529	1625.43
ARF6	2025.93	1467.81	1548.7	2014.4	1839.18	3112.14	1797.9	1372.95	1253.1	1687.93	1500.1	7432.47	1633.74	2502.08	1783.14	3028.33	2084.89	2434.16	1501.6	3197.97	1700.32	1666.21	1497.33	2074.41	1938.74	2814.46	1309.03	1699.41	2235.87	1419.81	2224.39	2152.86	1777.19	1997.74	1927.9	1876.7	1583.93	1647.59	2334.57	1898.7	1874.29	1958.56	2676.33	2203.94	2494.83	1969.06	1707.58	2345.96	3286.54
ARFGAP1	1196.17	1664.92	1239.18	1936.55	545.322	1504.12	1109.46	1498.1	1444.84	1830.56	1212.36	749.351	875.504	948.958	835.486	1109.95	1920.14	1968.58	1416	4672.55	1764.98	1215.86	773.814	589.195	1159.46	1617.04	771.311	1299.82	904.483	1609.43	1949.72	1257.44	1132.63	963.019	755.093	1118.75	1012.2	751.095	1001.86	812.987	1502.86	1195.47	751.74	1681.38	1581.37	945.66	795.928	2100.51	724.038
ARFGAP2	2626.83	2248.24	2050.87	2413.22	1997.08	2046.3	1841.45	2012.64	2156.04	2969.8	1965.92	957.143	1752.34	2248.96	2710.4	2957.23	2139.57	2176.89	1808.8	5936.33	2622.24	2231.72	1920.99	1848.11	1951.35	2836.03	1813.84	1573.57	1621.83	1896.23	2145.25	1697.51	1557.03	1805.28	1560.53	2103.18	2168.58	1482.57	2038.96	1700.43	1757.14	1695.86	1907.19	2555.97	1963.31	1839.25	2930.74	3297.16	1592.31
ARFGAP3	1310.03	918.508	581.169	1214.61	754.386	986.625	674.69	810.999	865.545	846.913	724.611	327.273	798.214	564.583	990.483	506.916	812.95	1215.84	1359.2	644.73	1181.39	726.897	1132.67	936.799	708.108	554.477	475.015	767.952	1039.96	811.321	1315.64	675.784	666.667	811.321	896.472	872.161	1190.82	697.573	627.706	831.169	1268.57	734.949	844.548	1399.15	988.711	1030.94	2093.1	475.601	825
ARFGEF1	8847.88	3699.04	4039.16	7925.18	7602.66	5884.77	3495.37	3276.04	3519.4	2139.38	3381.81	2281.82	3464.18	1454.51	2932.83	1766.96	3417.9	5575.64	9534.9	1182.79	3415.62	3422.34	3810.64	3420.47	3098.59	1826.32	5394.83	4270.16	2860.85	3784.91	6663.69	3397.93	3362.71	3125.65	6017.06	3237.51	3366.32	5276.36	3333.27	4022.16	5805.76	2512.48	4199.23	6242.23	5860.38	3193.2	2912.57	2635.4	2497.12
ARFGEF2	2616.69	1382.76	2730.52	3525.46	2831.87	1661.52	2870.68	2245.26	3176.61	1768.09	2765.98	864.935	2238.07	985.417	2104.69	1103.36	1470.5	2116.3	2303.2	3270.73	3316.25	3042.07	2888.26	2790.01	2464.86	1086.3	2670.59	3218.78	1829.43	2312.26	2294.23	2362.03	2454.47	2372.08	2574.81	2229.72	2115.49	2866.11	2355.6	2239.83	2408.57	1802.97	1882.83	2356.52	2209.78	2633.96	2179.89	1458.12	1264.42
ARFIP1	222.097	308.17	424.242	135.431	593.567	297.325	273.543	440.582	460.309	270.517	243.876	510.39	368.458	364.583	557.444	129.033	277.698	326.159	192	74.9064	389.59	427.586	467.19	308.868	528.829	209.277	290.026	358.255	696.881	367.925	507.449	440.869	451.813	293.585	340.595	423.751	434.003	346.11	262.832	513.42	505.714	433.933	703.016	360.01	359.36	418.113	440.014	187.91	581.731
ARFIP2	886.133	958.53	843.074	775.26	485.38	752.058	790.831	834.387	626.891	779.726	887.78	577.922	618.983	734.375	668.253	1132.33	1047.48	904.615	928	1687.53	709.779	723.448	554.244	567.788	794.595	414.24	571.429	724.778	620.858	1010.38	869.646	823.009	748.895	889.057	651.201	707.982	699.426	597.665	756.957	612.987	718.095	1005.47	539.443	854.65	818.438	668.679	1130.31	1040.06	329.808
ARFRP1	420.519	493.272	391.775	485.204	229.532	386.831	440.115	416.561	423.593	717.843	446.522	651.948	333.145	454.167	541.808	442.399	341.007	468.906	384.8	557.517	419.558	442.759	253.424	276.249	310.811	477.886	257.104	274.662	195.906	278.302	314.711	329.043	343.059	313.207	249.555	545.75	478.479	224.793	500.309	268.398	435.238	376.075	360.789	330.092	368.768	327.547	450.106	801.894	299.038
ARG1	31.5671	14.0077	20.5628	30.9251	30.7018	31.893	9.9331	10.7459	11.5587	106.085	15.7905	27.2727	9.9943	21.875	180.15	276.5	30.9353	29.0473	28	39.0583	32.3344	18.6207	23.2144	45.8716	62.1622	14.0237	10.9739	46.8487	9.7466	11.3208	21.4153	11.2631	1.7683	17.3585	18.2079	27.255	27.977	28.5452	24.7372	27.7056	90.4762	100.078	180.975	25.9287	21.6369	24.9057	51.806	13.8383	11.5385
ARG2	137.576	82.9959	135.833	132.338	197.617	77.2942	151.962	152.124	163.896	98.5944	171.722	63.7403	191.498	101.708	180.578	95.0237	126.604	122.098	155.048	73.4938	203.762	147.365	159.087	249.868	172.91	250.539	191.566	148.207	199.766	104.896	143.79	164.272	149.045	169.328	186.631	147.352	144.161	146.499	168.522	181.212	164.705	83.878	146.264	140.075	175.221	503.041	155.196	148.849	223.298
ARGFXP2	77.7903	87.0481	106.061	111.97	59.9415	57.6132	46.6094	68.268	53.0342	27.7	57.8987	68.8312	29.983	50	38.0693	94.7998	42.446	62.2442	68	43.3387	41.0095	44.8276	110.269	108.053	51.3514	87.3786	79.1691	84.5114	130.604	77.3585	40.9683	60.3379	64.5447	64.1509	77.1159	60.3504	48.7805	78.4992	47.0006	73.5931	50.4762	52.3847	104.408	106.707	73.3772	68.6792	25.5666	54.6249	44.2308
ARGLU1	6264.94	4253.35	9623.38	8247.4	9970.76	6404.32	6245.65	10250.3	7397.59	5811.7	7568.94	8337.66	8024.12	3215.62	4896.67	4268.63	5833.09	10325.1	5514.4	3966.29	4769.72	5229.66	6280.47	3745.16	6540.54	3689.32	6875.96	10392.2	5756.34	9184.91	4912.48	5251.01	8729.44	9181.89	10481.3	7998.7	5320.66	4019.52	7134.82	7781.82	4695.24	10618.5	2798.14	6183.99	6197.55	4415.09	6627.13	7144.21	3687.5
ARHGAP1	3599.77	4492.48	3126.62	3028.53	1897.66	2761.32	2497.04	2410.87	2488.53	4830.41	2429.99	3864.94	4200.29	2417.71	3275.32	2405.55	7261.87	2628.36	3728.8	3263.78	2325.71	3243.45	1880.37	1797.15	1620.72	4526.43	1990.2	2527.08	1699.81	2311.32	4470.2	3008.85	2867.37	2437.74	2062.85	3059.05	3509.33	2941.94	4845.39	2274.46	4527.62	2020.33	3737.82	4472.7	5210.72	2396.98	3795.29	4275.31	3256.73
ARHGAP10	561.443	513.284	247.835	436.15	972.222	344.65	60.3629	7.5853	8.839	342.419	29.8266	92.2078	234.534	50	474.507	576.699	274.101	249.806	846.4	164.259	29.9685	206.207	314.362	6.1162	6.3063	106.796	198.315	126.767	184.21	4.717	610.801	113.435	161.804	184.151	5.3553	222.583	237.446	513.813	276.438	25.1082	786.667	273.651	29.0023	836.699	504.233	85.283	193.095	339.403	37.5
ARHGAP11A	489.29	701.388	778.139	1120.77	618.421	309.671	1959.89	1060.68	969.573	700.162	1325.53	559.74	473.732	1430.21	1055.06	659.649	592.086	570.986	834.4	347.245	880.915	993.103	783.487	1345.57	2549.55	690.399	690.574	1546.01	2055.56	1610.38	492.551	1740.95	1329.8	2433.96	1982.52	926.022	915.351	1237.26	793.445	1910.82	700.952	2043	2243.62	714.036	607.714	523.019	875.992	459.578	440.385
ARHGAP11B	287.001	256.142	347.933	536.454	235.702	171.451	524.944	326.125	324.542	190.953	359.375	135.065	158.83	140.062	336.309	146.15	160.576	199.903	360.12	63.6169	227.918	280.69	194.421	273.068	435.595	196.332	152.169	414.648	330.409	257.547	162.104	444.336	385.5	577.359	581.304	239.773	283.357	343.015	277.675	688.892	262.733	510.5	490.777	260.793	340.113	156.981	333.476	183.642	89.4231
ARHGAP12	926.719	478.264	559.524	1328.71	328.947	671.811	394.269	505.057	456.23	201.562	375.464	766.234	600.993	96.875	98.5724	252.8	261.87	788.426	716	350.99	180.599	456.552	550.375	389.399	376.577	25.89	976.68	672.417	456.14	916.981	603.352	478.681	667.551	627.17	206.713	339.39	370.875	636.022	56.2771	477.922	783.809	318.999	622.97	748.94	428.975	616.604	442.033	214.13	432.692
ARHGAP15	2043.97	1118.62	853.896	2160.49	3226.61	943.416	1438.01	838.179	1388.41	907.617	1591.34	914.286	1625.08	1687.5	900.748	1033.58	678.417	1327.88	1236.8	912.253	1733.44	1073.79	1628.88	1472.99	2045.05	695.793	1522.24	1456.9	1639.38	984.906	1000.93	1384.55	1248.45	1563.02	1770.45	1482.15	1033.72	1102.56	1095.86	1793.07	874.286	1448.79	1822.51	1046.12	809.031	1987.92	1245.36	987.618	616.346
ARHGAP17	1332.58	2303.27	2811.69	1482.27	2058.48	1291.15	1923.21	2431.73	2491.93	3074.11	2251.03	2553.25	2215.41	1581.25	2299.12	2126.41	1650.36	1489.71	2224	3298.02	2338.33	2595.86	1973.23	1719.67	1503.6	3072.28	1745.64	2528.91	2049.71	1714.15	1686.22	2158.49	2179.49	1972.83	1650.49	3445.81	2949.07	2145.35	2278.29	3306.49	2208.57	1788.9	2439.68	1895.79	1933.21	1880	2068.2	3831.76	2461.54
ARHGAP18	165.727	216.119	286.796	115.169	476.608	240.741	443.935	136.536	232.534	189.775	389.5	158.442	284.505	352.083	312.033	135.616	309.353	272.214	300	90.9577	261.83	307.586	519.423	445.464	732.432	170.442	670.194	338.964	221.248	238.679	302.607	449.718	506.631	968.302	355.59	355.613	284.075	430.854	517.625	576.623	387.619	274.433	727.378	323.111	416.745	398.491	266.431	63.3649	289.423
ARHGAP19	514.092	693.383	979.437	1179.42	644.737	269.547	1070.49	647.914	753.357	895.83	721.979	374.026	616.317	392.708	908.226	510.866	573.381	502.103	807.2	430.712	1016.56	977.931	618.084	957.187	1046.85	416.397	765.04	597.092	624.756	781.132	640.596	646.018	401.415	829.434	951.096	941.596	857.963	789.453	739.641	982.684	679.048	1076.92	1548.72	787.833	857.009	575.094	813.421	348.871	778.846
ARHGAP20	3.3822	0	7.5758	12.7966	1.462	0	3.0564	0.6321	4.0796	1.7681	7.018	10.3896	3.9977	0	2.7192	5.2667	0	5.8095	0.8	3.2103	11.041	2.7586	55.1343	0	7.2072	0	7.0547	7.3488	26.3158	1.8868	9.311	3.218	4.4209	2.2642	3.2132	1.9468	3.5868	0.892	1.2369	3.4632	9.5238	5.473	0	1.9945	3.7629	34.717	14.8017	5.8267	0
ARHGAP21	1237.88	1153.64	936.147	1101.57	33.6257	1454.73	120.726	1118.84	36.716	28.2894	793.914	436.364	2369.32	92.7083	61.8627	610.932	2010.79	968.519	1374.4	976.993	46.53	73.1034	250.522	174.312	495.495	4.315	766.608	1339.32	1876.22	1216.04	1349.16	1158.49	1290.89	433.207	52.4816	45.425	19.3687	74.0391	31.5399	767.965	1536.19	1254.1	551.044	1834.95	2293.51	1156.23	1056.3	842.68	108.654
ARHGAP22	20.2931	185.102	870.13	27.7259	2.924	87.4486	877.937	1012.01	67.3126	29.4681	524.597	523.377	301.829	1265.62	6.1183	788.682	16.5468	166.814	236	566.078	23.6593	68.9655	17.4108	215.087	245.045	152.104	529.101	742.231	985.38	612.264	83.7989	864.843	1777.19	827.924	658.698	31.7975	11.4778	61.5505	456.401	662.338	18.0952	845.973	140.371	108.701	42.333	414.34	273.832	551.347	155.769
ARHGAP23	1419.39	1229.68	788.961	1200.75	223.684	415.638	1444.13	1180.78	916.539	2107.56	812.336	1283.12	1068.73	417.708	1386.13	620.149	1269.78	956.07	1025.6	788.657	1022.08	756.552	834.752	1365.95	1017.12	1368.93	1023.71	800.103	485.38	1092.45	1428.31	688.657	673.74	750.189	1066.77	705.386	939.024	880.44	682.127	587.879	1228.57	616.888	470.998	1227.62	1061.15	938.113	452.798	1217.77	199.038
ARHGAP24	7.8918	20.0111	33.5498	52.2527	19.0058	16.4609	52.7221	5.0569	21.0777	12.3766	102.639	11.6883	5.9966	14.5833	13.5962	48.7166	5.7554	38.1764	18.4	50.2943	7.0978	47.5862	19.3454	28.5423	20.7207	3.2362	13.3255	39.4999	7.7973	2.8302	26.0708	28.1577	2.6525	13.5849	11.7816	69.4354	45.1937	17.8407	29.0662	18.1818	57.1429	28.147	157.773	95.7367	33.8664	15.0943	78.0454	31.3183	228.846
ARHGAP25	1331.45	2366.31	1962.12	1304.19	2463.45	1791.15	1962.18	1459.54	3150.77	1313.1	2135.23	948.052	2833.73	2070.83	1796.74	1149.45	2403.6	2652.43	2510.4	2386.84	2358.83	2315.17	2092.2	1634.05	1245.95	1944.98	2241.03	2577.6	2008.77	1091.51	2524.21	2749.8	2619.81	2329.06	2292.05	1705.39	1903.87	1624.4	1713.05	1983.55	3331.43	1343.24	1612.53	2010.47	1349.01	3006.79	3664.77	3045.16	1530.77
ARHGAP26	586.246	815.451	1129.87	1311.65	1109.65	795.268	556.256	1044.88	526.942	758.509	857.953	725.974	954.792	495.833	634.262	880.848	847.482	731.991	778.4	1817.01	939.274	1201.38	1296.14	783.894	553.153	550.162	699.98	767.033	594.542	862.264	892.924	756.235	482.759	563.019	1491.98	1025.31	933.285	1867.03	918.367	822.511	1012.38	956.998	2320.19	691.1	2833.49	736.604	684.915	413.693	3575.96
ARHGAP27	951.522	1422.99	1574.98	1194.21	820.175	786.636	1504.96	1451.52	1453.1	2545.8	1797.62	1475.21	1817.06	922.667	1575.8	1502.34	1986.93	892.531	819.536	3884.23	1058.04	1043.31	1012.79	380.224	838.216	1659.63	1702.49	1097.57	660.322	993.019	808.697	1451.91	1804.62	2480.3	1360.25	2210.31	2156.66	1392.96	2527.31	1516.72	1054.83	1238.91	1847.81	1470.66	2069.61	1904.45	1751.83	4306.28	3316.35
ARHGAP29	4.5096	1.0006	2.1645	42.6553	7.3099	94.6502	3.0564	0.6321	2.0398	4.7149	5.2635	2.5974	0	0	36.0299	3.95	0	27.3874	1.6	0	2.3659	0	0.9673	31.6004	0.9009	1.0787	0.7839	12.8604	0	0	17.6909	6.436	0.8842	0.7547	4.2842	1.9468	2.1521	0.892	3.7106	0.8658	14.2857	10.1642	37.123	17.9506	6.5851	0.7547	4.7096	0	50.9615
ARHGAP30	2091.32	2781.54	2989.18	2151.96	3369.88	3448.56	1725.31	3711.76	3070.54	4934.73	3858.16	1910.39	4440.82	4014.58	3374.58	4872.97	4094.24	2445.78	2231.2	4018.19	3700.32	3372.41	3950.32	1935.78	1700	5423.95	4095.63	2684.16	3894.74	3000	2459.03	2531.78	2974.36	2061.89	2854.36	4164.83	4670.73	3775.99	3197.28	3644.16	2380.95	3011.73	5715.78	2046.37	4222.95	3647.55	4542.78	6238.16	6942.31
ARHGAP31	257.046	130.072	62.7706	263.396	504.386	83.3333	57.3066	31.6056	84.9907	266.981	134.22	0	45.9739	37.5	180.15	52.6666	745.324	340.268	259.2	90.4227	127.76	87.5862	464.288	71.3558	63.964	75.5124	41.5442	58.7906	86.7446	33.0189	767.225	46.6613	42.4403	40.7547	34.2737	367.943	167.862	58.8744	91.5275	54.5455	291.429	65.6763	248.26	795.812	773.283	104.151	546.318	787.327	1028.85
ARHGAP32	296.505	112.062	843.074	370.035	7.3099	237.654	1086.53	524.652	622.132	27.1107	1106.22	315.584	3.9977	65.625	14.9558	830.815	146.043	220.759	1130.4	524.88	131.703	146.207	5775.56	1270.13	448.649	87.3786	216.343	1069.25	615.984	920.755	171.322	910.7	598.585	1123.77	1417	63.5951	295.552	404.985	737.168	9.5238	445.714	551.212	272.622	422.837	64.9106	2181.89	2087.71	1000	534.615
ARHGAP33	1227.73	1135.63	2338.74	1426.82	194.444	747.942	912.321	1766.12	1106.92	2207.75	979.891	1437.66	1070.73	272.917	1269.2	1602.38	2439.57	952.75	1796.8	3974.85	812.303	1204.14	307.591	181.447	742.342	499.461	541.642	1031.59	413.255	1092.45	1084.73	776.347	1484.53	1170.57	888.975	939.001	1684.36	723.442	1035.25	629.437	1324.76	1409.7	925.754	1744.2	1460.96	1007.55	575.921	2334.3	376.923
ARHGAP39	6.7644	10.0055	8.658	2.1328	8.7719	4.1152	3.8204	3.7927	30.5966	3.5362	10.527	2.5974	1.9989	2.0833	9.5173	0	14.3885	3.3197	4	3.2103	19.7161	23.4483	4.8363	16.3099	10.8108	25.89	2.3516	0.9186	0.9747	0.9434	6.5177	5.6315	0	0.7547	1.0711	6.4893	3.5868	9.8124	14.2239	2.5974	13.3333	5.473	8.1206	6.9808	2.8222	3.0189	32.2946	14.5666	15.3846
ARHGAP4	554.679	585.323	6844.16	772.061	2675.44	902.263	4055.01	6388.12	7261.6	10254.9	6071.47	4588.31	5762.73	4689.58	5201.22	7641.92	637.41	797.555	382.4	23198.5	5201.1	6280	2264.37	2260.96	3089.19	5007.55	5173.43	5712.79	2898.64	5496.23	258.845	4185.84	5923.08	5523.02	3215.3	6290.07	6306.31	3790.26	7540.51	2548.05	747.619	5395.62	3306.26	479.681	1060.21	5685.28	3426.6	10874.7	3398.08
ARHGAP42	9.0192	11.0061	4.329	14.9294	17.5439	6.1728	4.5845	14.3363	2.0398	16.5021	16.6678	2.5974	0	0	14.9558	0	13.6691	4.9795	8.8	0	0	2.7586	14.509	43.8328	72.0721	3.2362	4.7031	6.4302	4.8733	27.7075	10.2421	3.218	0	1.5094	2.1421	7.7872	16.4993	5.3522	2.4737	3.4632	41.9048	6.2549	26.6821	6.9808	6.5851	0.7547	51.806	2.185	0
ARHGAP5	1198.42	759.42	1632.03	1392.7	2875.73	648.148	1875.07	2367.89	78.1914	955.945	1338.69	3484.42	723.59	19.7917	2087.02	589.866	517.986	1493.86	1643.2	325.843	168.77	328.276	2791.53	1335.37	2012.61	110.032	3270.23	531.871	569.201	1191.51	1665.74	1294.45	1128.21	58.8679	2825.44	1697.6	2164.99	1918.77	542.981	58.8745	1980.95	946.833	182.135	1397.16	736.595	2867.17	946.636	1148.58	197.115
ARHGAP6	2.2548	13.0072	4.329	7.4647	5.848	14.4033	32.0917	0.6321	1.3599	7.0723	110.534	3.8961	0	23.9583	4.0789	0	53.2374	5.8095	1.6	15.5163	10.2524	4.1379	1.9345	17.3293	16.2162	2.1575	45.4635	8.2674	9.7466	2.8302	10.2421	3.218	60.1238	2.2642	21.4211	1.2979	0	3.5681	13.6054	135.931	14.2857	7.0367	242.459	2.9918	69.6143	21.1321	43.7323	0.7283	25
ARHGAP8	1.1274	6.0033	11.9048	5.3319	2.3684	0	3.0564	2.5284	0.6799	1.7681	7.018	7.7922	0	0	13.535	0	14.3885	6.6394	7.2	17.603	1.1041	0.6897	30.8849	9.1743	19.8919	2.1575	29.0025	0.9186	0	0	0.9311	1.609	0	0.7547	3.2132	3.2446	3.5868	0	9.8949	1.2208	0.9524	3.1274	10.4408	1.9945	2.8222	8.1057	18.8385	46.2345	6.7308
ARHGAP9	781.285	804.444	1448.05	1973.87	2703.22	1222.22	1613.75	1583.44	2268.91	3698.25	2079.97	1402.6	2104.81	2363.54	2717.88	1948.66	1115.83	844.031	561.6	4153.02	1690.85	1837.24	2070.92	1080.53	894.595	3088.46	2275.52	1915.29	1681.29	1200.94	824.022	1464.2	1968.17	2121.51	1294.9	2817.65	3578.91	1610.13	1755.72	1852.81	778.095	1787.33	1969.84	673.149	1298.21	2530.57	3290.02	6729.06	2600
ARHGDIA	7174.75	6216.43	5088.74	5651.83	1846.49	4733.54	3766.95	3259.8	3656.64	8961.25	3459.01	9412.99	5638.14	5368.75	4772.94	11605.1	13954	3714.73	4760.8	30470.3	4541.8	5357.24	1647.26	2388.38	2925.23	6259.98	2459.73	3363.92	2575.05	4068.87	5932.03	3832.66	2948.72	3285.28	1826.15	4154.45	4378.77	4305.86	6262.83	2922.94	5460	4881.94	4438.52	6888.06	8977.42	3593.96	2507.54	12515.7	5375.96
ARHGDIB	23582.9	16414.1	8825.76	15730.2	18081.9	21921.8	9156.06	6445.01	15114.7	15517.3	9923.48	7137.66	22459.3	14119.8	15231.8	19946.1	21984.2	11224.7	11520.8	22929.9	21418.8	14411.7	12694.4	9580.02	6447.75	19596.5	12832.5	8728.56	10507.8	7255.66	17268.2	8982.3	8394.34	9654.34	8265.32	13815.1	16447.6	16569.6	12222.6	12196.5	13401.9	9698.2	18317.9	21008.2	19327.4	16573.6	17878.4	15772	16233.7
ARHGEF1	4317.93	4314.38	7347.4	5282.86	4019.01	4576.13	3803.63	6234.51	5243.58	10826	8503.21	3437.66	3729.22	3384.38	5029.23	7040.2	6244.6	4271.61	2970.4	18038	4658.52	4202.07	3559.55	2567.79	3364.86	2699.03	4386.44	5553.87	3349.9	4803.77	3380.82	4758.65	5771.88	4650.57	3774.39	5478.91	6385.22	3790.26	5317.87	3773.16	3170.48	5606.72	4743.62	3712.79	7788.33	6226.42	6475.75	12989.8	5647.12
ARHGEF10	171.364	62.0343	73.5931	101.306	21.9298	139.918	48.1375	19.5954	11.5587	109.032	10.527	9.0909	369.124	21.875	150.918	26.3333	67.6259	102.08	75.2	6.9556	123.817	57.931	924.708	39.7554	18.018	61.4887	285.322	58.7906	93.5673	13.2075	139.665	19.3081	8.8417	43.0189	56.7658	36.34	30.8465	25.8691	58.7508	3.4632	80.9524	36.7475	53.3643	48.8656	174.976	33.2075	90.1559	19.665	21.1538
ARHGEF10L	3.3822	6.0033	3.2468	6.3983	2.924	1.0288	2.2923	0	2.0398	58.9362	3.509	0	7.3292	0	14.276	3.95	0	0.8299	3.2	476.726	4.7319	6.8966	1.9345	3.0581	2.7027	3.2362	0.7839	1.8372	6.8226	6.6038	11.1732	3.218	1.7683	15.0943	8.5684	73.329	164.993	16.0567	181.818	0.8658	40.9524	6.2549	582.367	3.989	41.3923	23.3962	87.4646	2.185	737.5
ARHGEF11	609.921	1063.59	1208.87	833.911	122.807	479.424	378.988	860.303	18.358	40.0766	173.696	16.8831	1054.07	18.75	59.8232	895.332	639.568	662.278	144	1181.92	72.5552	38.6207	10.6399	762.487	89.1892	19.4175	714.09	1069.25	888.889	853.774	1203.91	368.463	1198.94	21.1321	11.7816	611.94	788.379	2183.71	56.8955	11.2554	1205.71	942.142	734.339	1161.81	552.211	133.585	208.57	765.477	715.385
ARHGEF12	67.6437	74.0409	71.4286	220.741	20.4678	103.909	459.217	42.9836	2226.08	446.736	760.578	38.961	312.49	116.667	410.605	47.3999	658.993	251.466	183.2	246.656	2186.12	1202.76	144.123	2019.37	2971.17	335.491	1522.24	80.837	81.8713	42.4528	124.767	312.952	731.211	160	66.4053	103.18	69.5839	41.9257	107.607	238.961	543.809	111.024	1012.76	183.495	161.806	1458.87	1519.19	239.621	93.2692
ARHGEF15	6.7644	9.005	7.5758	12.7966	1.462	38.0658	2.2923	5.689	0.6799	6.483	3.509	0	1.9989	0	20.3943	5.2667	2.1583	24.0677	1.6	0.535	2.3659	0	0	9.1743	0	1.0787	1.5677	21.1279	6.8226	4.717	20.4842	4.0225	7.9576	0.7547	0	1.9468	2.1521	0	2.4737	0.8658	7.619	2.3456	10.4408	6.9808	0	0	3.364	0	0
ARHGEF16	18.0383	18.01	44.3723	61.8502	0	10.2881	19.1022	36.6625	1.3599	0.5894	3.509	5.1948	1.9989	0	5.4385	15.8	13.6691	9.1291	11.2	5.8855	3.9432	2.7586	3.8691	7.1356	0.9009	8.63	5.487	2.7558	3.8986	14.1509	17.6909	4.0225	4.4209	2.2642	6.4263	3.2446	3.5868	6.2443	3.0921	1.7316	46.6667	11.7279	1.1601	41.8848	7.5259	30.9434	14.1289	42.9716	0
ARHGEF17	2023.68	2498.38	1558.44	2485.74	127.193	895.062	878.701	1769.28	2761.86	839.251	744.788	1045.45	2093.48	313.542	435.758	647.799	2046.04	1757.77	1941.6	135.902	1280.76	1871.03	454.616	993.884	384.685	2714.13	1166.37	1126.21	561.404	1146.23	1938.55	1123.09	1423.52	989.434	997.151	486.697	466.284	1167.68	1011.75	381.818	1910.48	516.028	153.132	2625.78	1544.68	6778.11	4591.89	4667.15	30.7692
ARHGEF18	2921.08	3826.11	3683.98	3675.82	3043.86	1649.18	3893.03	3630.85	3077.34	6226.02	3661.65	1392.21	2644.5	2166.67	3838.89	3523.39	2283.45	2858.25	3792	4548.42	4127.76	3321.38	2992.73	2521.92	2366.67	4571.74	3895.75	2237.72	1773.88	3252.83	3228.12	2273.53	1706.45	2345.66	2654.07	2937.7	4880.92	3093.58	3140.38	1900.43	3659.05	2896.01	2821.35	3754.67	2888.99	2750.94	2490.72	4706.48	2482.69
ARHGEF19	187.148	287.159	160.173	150.36	64.3275	181.07	204.775	266.751	152.303	186.828	134.22	149.351	173.235	108.333	133.243	163.266	255.396	328.649	232	182.986	210.568	195.862	26.1162	170.234	93.6937	83.0636	105.036	162.593	173.489	194.34	215.084	185.841	209.549	129.811	107.105	167.424	175.036	102.584	222.016	72.7273	216.19	176.701	92.8074	209.424	216.369	172.076	121.778	331.391	18.2692
ARHGEF2	6948.14	5107.82	5984.85	8533.19	4659.36	7327.16	4964.28	4885.59	6631.99	8210.99	4774.01	4883.12	4741.31	4403.12	6428.96	4080.34	5466.91	3380.27	3863.2	10934.7	6135.65	6498.62	4821.83	4867.48	3590.99	11476.8	4351.95	4961.37	5260.23	4236.79	4878.96	5078.04	5036.25	3495.09	4499.5	5098.64	6469.87	6497.6	3983.3	4402.6	5623.81	4762.31	4741.3	4167.54	4976.48	5412.83	6267.85	8664.97	4338.46
ARHGEF3	285.231	842.466	1097.4	179.152	603.801	207.819	1100.29	1347.66	699.643	401.356	1866.79	410.39	1499.82	658.333	513.256	660.966	514.389	569.327	593.6	1037.45	754.732	715.172	1110.42	793.068	772.973	775.62	1447.78	726.615	1640.35	1224.53	333.333	1357.2	1312.11	661.132	1372.02	397.145	320.66	446.91	565.863	1290.91	931.429	1206.41	1191.42	590.376	678.269	858.868	2194.69	560.087	2009.62
ARHGEF33	11.274	10.0055	34.632	15.9957	27.7778	6.1728	18.3381	30.3413	4.0796	4.1255	16.6678	15.5844	5.9966	0	4.0789	10.5333	3.5971	26.5575	15.2	0.535	9.4637	3.4483	9.6727	18.3486	1.8018	5.3937	7.0547	33.0697	35.0877	16.9811	13.0354	12.0676	16.7993	12.8302	55.6948	8.4361	11.4778	12.4885	9.2764	20.7792	20	14.8554	25.522	11.9671	8.4666	17.3585	2.6912	10.925	1.9231
ARHGEF35	40.5862	13.0072	8.658	19.1949	4.386	50.4115	144.413	20.2276	3.3996	7.6617	124.57	7.7922	41.3099	88.5417	15.6356	1.3167	28.0576	13.2788	5.6	21.4018	5.5205	9.6552	4.8363	36.6972	108.108	6.4725	7.0547	153.407	28.2651	16.9811	17.6909	67.5784	138.815	164.528	209.927	10.3829	9.3257	32.1133	19.7897	62.3377	26.6667	29.7107	56.8445	21.9397	26.3405	67.1698	100.921	117.99	9.6154
ARHGEF37	11.274	11.0061	4.329	25.5932	5.848	22.6337	27.5072	4.4248	1.3599	134.964	38.5991	6.4935	1.3326	0	119.647	0	12.9496	26.5575	34.4	0	5.5205	5.5172	6.7709	90.7238	376.577	1.0787	4.7031	5.5116	4.8733	1.8868	7.4488	69.992	1.7683	6.0377	9.6395	29.8507	16.4993	0	3.7106	33.7662	92.381	0.7819	119.49	18.9479	8.4666	3.0189	70.6445	0.7283	0
ARHGEF4	5.637	16.0088	11.9048	22.394	5.848	3.0864	2.2923	5.689	10.8788	7.0723	19.2996	14.2857	1.3326	0	4.0789	7.9	5.7554	10.789	28.8	1.0701	7.8864	4.8276	4.8363	7.1356	5.4054	9.7087	4.7031	11.0232	13.6452	1.8868	5.5866	9.6541	6.1892	0	9.6395	4.5425	2.8694	2.6761	3.7106	13.8528	25.7143	7.0367	11.6009	10.9698	5.6444	4.5283	6.728	2.9133	0
ARHGEF5	36.0767	12.0066	7.5758	10.6638	14.6199	25.7202	117.669	27.1808	5.4394	1.7681	148.256	3.8961	31.9819	48.9583	6.7981	3.95	12.9496	27.3874	12	47.619	0.7886	11.0345	1.9345	10.1937	67.5676	5.3937	7.8385	179.127	3.8986	7.5472	19.5531	62.7514	168.877	176.604	164.942	7.7872	3.5868	11.5965	11.7502	31.1688	16.1905	24.2377	60.3248	18.9479	13.1703	55.8491	59.2068	87.3999	7.6923
ARHGEF6	5296.51	6363.52	4843.07	3624.63	18181.3	5103.91	4997.13	5265.49	12350.2	8457.93	5251.23	2210.39	10574	3621.88	9484.7	3711.68	6428.06	7290.86	4778.4	1981.27	11379.3	10936.6	11091.7	5646.28	3131.53	6853.29	15020.2	5915.8	5332.36	3633.96	8119.18	5395.82	7336.87	5169.06	5734.42	9018.82	9489.96	8918.58	4870.13	5836.36	6686.67	4279.12	5060.32	7550.24	6117.59	4692.08	4922.24	4146.39	5202.88
ARHGEF7	1706.88	2357.3	2149.35	2282.06	4396.2	1320.99	1263.8	1821.11	1166.07	2762.34	1459.75	1044.16	1165.34	1014.58	2264.45	1648.46	2232.37	2339.55	2196	3258.96	1097	1133.79	2046.74	1217.13	1586.49	683.927	1513.62	1634.19	1573.1	2028.3	2608.94	1624.3	2176.83	2150.94	1955.74	1810.51	2425.39	1490.59	1501.55	1615.58	2615.24	1605.94	1167.05	2549.99	2615.24	1806.79	1896.64	2457.39	1296.15
ARHGEF9	364.149	365.202	610.39	443.615	770.468	342.593	499.714	643.489	575.217	525.122	541.265	327.273	461.072	288.542	573.759	348.916	320.863	424.92	555.2	284.109	402.997	471.034	509.75	445.464	421.622	464.941	509.504	733.963	410.331	473.585	334.264	579.244	637.489	567.547	554.806	545.101	656.385	415.689	502.164	528.139	361.905	518.374	301.624	374.969	212.606	233.208	650.602	549.891	225.962
ARID1A	9342.73	8988.97	11589.8	9776.59	8741.23	7668.72	9454.06	8481.04	9991.5	10682.2	8850.6	9400	9459.31	6706.25	12780.4	10479.3	6322.3	6647.68	7559.2	6681.65	9104.89	9615.17	8894.03	7449.54	7528.83	12642.9	7160.49	8698.25	8686.16	8949.06	10895.7	8991.95	7987.62	6535.85	7201.77	9552.24	10297	10950.6	5996.91	8020.78	10714.3	7053.17	8930.39	8594.37	8812.79	7179.62	8095.86	9952.66	8543.27
ARID1B	5447.58	4273.36	9650.43	5369.23	5839.18	5135.8	11465.9	8568.27	6311.75	5142.18	8983.94	5836.36	6264.45	4459.38	6426.92	6130.39	2769.78	4810.23	4810.4	2612.63	4776.03	5414.48	6329.8	11199.8	7038.74	4921.25	5415.64	7049.36	6779.73	6690.57	8862.2	6924.38	7373.12	5065.66	11314.6	4448.41	5601.87	8417.26	3171.3	6989.61	9072.38	5561.38	4436.19	5370.23	2952.96	6028.68	3319.62	11202.5	3333.65
ARID2	2454.34	1790.99	3771.64	4152.49	6277.78	1663.58	3336.01	2835.65	2479.01	1419.77	3801.14	4320.78	2934.34	1968.75	2218.22	1412.78	1143.17	1878.11	2068.8	2115.57	2110.41	2295.17	3162	2820.59	4893.69	2203.88	2910.44	3797.5	2832.36	3093.4	2417.13	2949.32	3223.7	3112.45	4577.68	2083.71	1812.05	3123.91	1965.37	3748.05	2586.67	2107.9	4249.42	2577.91	3061.15	2824.15	2197.38	2872.54	1972.12
ARID3A	257.046	485.268	913.42	862.703	235.38	644.033	442.407	716.814	1189.19	931.192	444.767	1358.44	617.65	426.042	561.523	529.299	815.108	349.397	386.4	540.931	483.438	915.172	435.27	640.163	598.198	929.881	523.614	530.952	478.558	573.585	466.48	453.741	344.828	383.396	306.321	773.524	837.159	776.072	418.058	328.139	465.714	624.707	1096.29	491.648	918.156	496.604	300.071	778.587	655.769
ARID3B	301.015	673.372	349.567	299.653	216.374	242.798	606.686	359.671	374.639	614.115	434.24	240.26	255.189	404.167	419.443	389.733	567.626	362.676	540.8	2206.53	391.167	402.069	409.154	181.447	383.784	578.209	174.015	392.243	557.505	597.17	411.546	785.197	563.218	784.906	717.606	428.293	445.481	160.567	1606.68	348.052	588.571	253.323	530.162	590.376	937.912	492.83	316.218	505.462	442.308
ARID4A	1724.92	1585.88	1836.58	2325.78	2732.46	3272.63	1658.07	1566.37	1913.31	864.594	1575.55	1161.04	1580.44	3066.67	1798.1	1693.23	997.842	2275.65	1539.2	2315.68	1844.64	1706.9	2233.42	2328.24	1568.47	964.401	2671.37	1986.94	2629.63	1908.49	1898.51	1592.92	1755.97	1710.19	2464.49	1717.72	1725.25	1958.91	1599.26	2285.71	2181.9	1339.33	1838.75	1551.73	1541.86	1774.34	1934.99	571.012	1732.69
ARID4B	2333.53	1730.49	2362.85	3150.09	3898.32	4007.07	2299.79	1910.87	2902.6	1117.05	2799.31	1902.6	2002.73	3405.21	2735.53	2097.45	1132.23	2480.64	1972.34	2350.45	2885.94	2605.02	4228.89	3622.4	2343.09	1396.99	3404.27	2525.24	3932.75	2381.56	2166.74	2255	2825.75	2224.29	3523.77	2362.1	2881.92	2628.99	1888.44	3181.82	2558.6	1805.09	2500	1894.29	2059.53	2210.57	3269.03	835.98	2025
ARID5A	1254.79	1105.61	1441.56	678.219	390.351	588.477	540.974	1373.58	387.557	1228.23	739.524	2528.57	493.054	569.792	1377.97	2900.61	2414.39	1062.3	812	4768.33	359.622	381.379	1238.1	722.732	370.27	403.452	504.801	1086.71	885.965	1105.66	1394.79	1034.59	930.15	335.094	319.174	689.812	791.248	606.585	367.965	655.411	1453.33	1268.96	410.673	1239.59	1122.3	529.057	481.055	868.9	536.538
ARID5B	117.249	205.113	734.848	158.891	491.228	44.2387	635.721	749.052	1306.14	463.238	868.48	463.636	1716.36	406.25	569.001	782.099	229.496	316.2	123.2	298.555	2046.53	1353.1	525.226	440.367	690.09	1572.82	1260.43	574.127	2170.57	859.434	229.05	834.272	596.817	193.962	1275.62	338.092	532.999	113.289	337.044	505.628	223.81	1019.55	310.905	229.369	898.401	2614.34	984.314	378.004	892.308
ARIH1	2209.7	1772.98	2169.91	2899.49	3500	1786.01	2396.94	2137.17	2503.48	1908.35	2434.38	2709.09	2299.36	1396.88	2146.84	1448.33	1821.58	2037.46	1996.8	4073.3	2697.95	2449.66	2654.18	2422.02	2890.99	2060.41	3084.46	2461.86	2299.22	2629.25	2353.82	2181.82	2296.2	2114.72	3080.35	2109.67	2087.52	2597.61	1961.66	2457.14	2385.71	1875.68	2204.18	2248.82	2335.84	2135.09	2095.11	1463.22	1781.73
ARIH2	1943.83	1786.45	2453.83	2980.18	2100.88	2504.12	2161.41	2685.5	2641.42	2081.42	2690.97	1517.26	2057.55	1769.79	2258.16	2511.91	1554.85	1901.94	1586.9	1934.87	1959.68	2385.15	1865.75	2136.6	3117.63	1423.95	2227.59	2695.39	2075.05	2773.58	1692.1	2385.95	2502.75	2261.58	2092.75	2272.06	1919.6	1645.57	2210.93	2354.52	1709.01	2683.83	1767.76	1532.04	1743.58	1798.72	2203.34	1978.15	1201.67
ARL1	630.214	717.396	677.489	660.091	649.123	795.268	790.831	684.577	845.827	394.873	742.156	683.117	475.064	759.375	569.681	512.182	504.317	977.648	1082.4	283.039	845.426	835.172	722.549	791.03	834.234	432.578	861.454	653.126	948.343	766.038	880.819	783.588	803.713	756.226	917.893	745.62	651.363	732.362	617.192	921.212	984.762	746.677	669.374	799.801	444.967	660.377	727.975	410.779	491.346
ARL10	122.886	157.087	16.2338	123.7	49.7076	28.8066	73.3524	32.8698	455.55	40.666	217.559	7.7922	475.064	13.5417	113.528	9.2167	81.295	78.8426	290.4	6.4205	174.29	245.517	10.6399	40.7747	35.1351	129.45	224.966	215.872	120.858	25.4717	304.469	150.442	219.275	165.283	12.8526	50.6165	45.911	5.3522	116.883	88.3117	237.143	26.5833	35.9629	249.314	107.244	543.396	319.582	364.166	32.6923
ARL11	425.028	612.338	373.377	809.384	605.263	707.819	694.556	723.135	617.372	350.67	517.579	194.805	263.851	402.083	503.059	193.55	266.906	492.144	806.4	168.539	933.754	517.931	807.668	502.548	337.838	768.069	608.27	711.917	589.669	400	325.885	599.356	660.477	551.698	603.003	508.112	568.149	644.051	494.743	645.887	338.095	430.805	881.67	316.131	459.078	280	289.979	396.941	758.654
ARL13A	9.0192	3.0017	11.9048	13.863	11.6959	0	11.4613	9.4817	10.8788	3.5362	14.9133	9.0909	8.6618	13.5417	5.4385	5.2667	10.0719	9.1291	8	1.0701	6.3091	6.2069	8.7054	12.2324	12.6126	19.4175	19.5963	8.2674	12.6706	3.7736	7.4488	17.6991	10.6101	6.0377	16.0658	3.8936	5.0215	7.1363	6.8027	10.3896	11.4286	2.3456	3.4803	2.9918	5.6444	9.0566	5.3824	5.0983	0.9615
ARL13B	92.4464	133.073	187.229	205.812	201.754	212.963	154.346	223.135	163.182	72.4915	185.978	225.974	143.918	191.667	185.588	118.5	134.532	131.958	157.6	29.9625	191.64	167.586	137.352	265.036	276.577	93.8511	182.638	231.488	427.875	235.849	134.078	222.043	212.202	177.358	248.484	170.668	163.558	210.521	166.976	240.693	168.571	201.72	192.575	100.723	177.799	166.792	151.381	101.966	287.5
ARL15	121.759	144.08	117.965	102.373	160.819	198.56	201.719	144.754	147.544	79.5639	153.519	254.546	69.2941	126.042	108.769	46.0833	128.777	191.712	143.2	48.1541	164.038	126.207	193.453	214.067	427.027	49.6224	313.541	158	234.893	179.245	109.87	308.125	180.371	73.2075	188.506	144.711	139.885	198.924	85.3432	164.502	167.619	131.353	286.543	87.7587	144.873	137.358	222.026	34.2316	179.808
ARL16	496.054	558.308	194.805	689.949	172.515	590.535	217.001	505.057	713.241	297.628	445.644	184.416	314.488	253.125	373.216	438.449	565.468	706.264	354.4	665.062	274.448	548.276	292.115	218.145	142.342	237.325	406.036	482.266	284.6	211.321	233.706	388.576	271.441	413.585	381.295	634.653	438.307	243.526	395.795	135.931	412.381	780.297	199.536	408.876	488.241	326.793	407.72	409.323	128.846
ARL17A	1382.44	434.85	753.03	789.059	702.778	656.955	691.736	917.042	646.772	315.645	139.834	343.571	329.613	583.052	666.927	281.371	785.309	1156.71	495.296	264.382	372.673	786.752	1197.53	605.658	811.658	381.553	1009.45	500.684	1697.19	705.726	810.289	318.061	1000.51	639.109	502.688	626.911	652.324	453.592	787.378	544.424	602.276	962.658	909.316	577.841	973.913	585.313	613.645	538.645	586.721
ARL17B	27.8692	8.8149	12.132	35.8091	247.032	10.9671	12.3782	10.3919	184.226	8.5222	8.4216	24.4416	4.3109	19.3229	13.5758	2.8967	29.705	19.7687	4.576	2.9053	104.748	19.1034	212.151	229.215	14.7748	18.6624	153.329	16.0572	5.8772	94.566	16.2384	4.5776	14.4828	13.5472	8.0865	107.547	21.6428	14.1566	19.2888	14.8918	98.7143	89.093	12.3086	8.7459	261.157	184.023	112.486	104.45	95.9808
ARL2	1130.78	753.416	248.918	996.001	543.86	934.732	356.829	270.544	662.812	1782.23	331.601	628.571	758.237	564.583	929.98	392.366	1514.39	469.736	621.6	1060.46	768.139	780.69	458.485	594.292	392.793	1207.98	639.028	382.139	256.335	217.924	750.466	452.936	359.858	400.755	278.474	856.58	868.171	600.341	1081.63	444.156	444.762	440.188	547.564	621.291	517.404	656.604	833.605	1959.21	394.231
ARL2BP	783.54	837.463	891.775	456.412	733.918	671.811	923.018	1059.42	716.641	740.239	1009.72	1097.4	984.775	1297.92	1099.25	1370.65	786.331	803.365	835.2	870.519	1102.52	838.621	703.204	1009.17	1234.23	1314.99	881.05	938.812	1503.9	1189.62	878.957	1209.98	1282.94	1112.45	862.198	906.554	861.549	831.378	1047	1144.59	915.238	1075.06	1177.49	765.894	768.58	883.019	1044.87	850.692	1252.88
ARL3	571.59	216.119	391.775	699.547	195.906	190.329	248.329	197.219	112.868	193.9	201.768	300	135.923	209.375	206.662	414.749	263.309	178.433	257.6	118.245	169.558	116.552	124.778	214.067	214.414	158.576	199.882	277.418	398.635	290.566	363.128	219.63	286.472	205.283	305.25	209.604	217.36	344.326	327.149	380.952	358.095	276.779	203.016	352.032	374.412	322.264	205.206	335.761	409.615
ARL4A	1162.35	665.368	200.216	396.694	685.673	742.798	279.656	165.613	388.237	464.417	428.976	144.156	401.772	636.458	494.222	725.482	723.741	1327.05	750.4	890.316	619.085	503.448	35.7889	741.081	923.423	214.671	712.522	519.01	1004.87	293.396	867.784	510.056	484.527	827.17	517.319	836.47	360.115	187.328	624.614	642.424	840	976.544	548.724	843.68	815.616	293.585	808.712	49.5266	952.885
ARL4C	208.568	1000.55	274.892	242.069	95.0292	147.119	220.821	261.694	231.175	326.507	1677.31	305.195	215.878	656.25	254.249	244.9	474.82	1117.08	496.8	432.317	409.306	557.931	474.928	381.244	788.288	265.372	261.023	105.639	511.696	322.642	246.741	533.387	132.626	394.717	718.677	427.644	90.3874	65.1187	572.665	244.156	750.476	376.075	169.374	413.862	1846.66	476.981	1847.52	516.388	418.269
ARL4D	14.6561	19.0105	17.316	5.3319	2.924	14.4033	0.7641	15.1707	1.3599	1.7681	15.7905	22.0779	7.3292	5.2083	2.0394	28.9666	7.1942	22.4079	6.4	7.4906	3.9432	6.2069	1.9345	3.0581	8.1081	6.4725	2.3516	14.6976	12.6706	20.7547	8.3799	8.0451	10.6101	9.8113	3.2132	3.8936	2.1521	2.6761	8.658	7.7922	13.3333	16.4191	3.4803	3.989	16.9332	11.3208	6.0552	8.74	24.0385
ARL5A	786.922	708.391	952.381	637.697	1690.06	1089.51	1373.83	931.732	1043.01	625.313	1170.26	2333.77	968.784	1538.54	1173.35	1275.85	534.532	1247.37	937.6	575.709	1097.79	1115.86	1127.83	1807.34	1511.71	836.03	1614.74	1240.11	1363.55	1161.32	932.03	1085.28	963.749	1144.15	1436.28	1035.04	1139.89	1239.04	902.288	1597.4	1131.43	1105.55	1359.63	980.304	693.321	1086.04	1167.99	662.782	1405.77
ARL5B	649.38	340.188	1123.38	967.209	950.292	224.28	757.211	554.994	718.001	389.568	528.106	1784.42	1120.7	152.083	607.07	217.25	454.676	760.209	849.6	475.12	469.243	642.759	716.745	642.202	649.549	569.579	837.155	730.289	631.579	638.679	1202.98	459.373	498.674	614.34	743.311	571.058	398.135	996.405	570.81	694.372	1710.48	397.185	293.503	2418.35	663.217	2093.58	674.823	385.288	236.538
ARL5C	5.637	12.0066	1.0823	3.1991	0	19.5473	8.405	3.7927	36.716	7.6617	2.6318	2.5974	16.6572	4.1667	2.7192	0	10.7914	4.9795	2.4	3.2103	14.9842	48.2759	11.6072	3.0581	3.6036	36.6775	51.7343	21.1279	6.8226	0	0	4.827	27.4094	8.3019	0	7.7872	12.1951	9.8124	4.9474	1.7316	3.8095	0	16.2413	2.9918	8.4666	5.283	2.0184	0.7283	0
ARL6	33.8219	9.005	34.632	28.7923	48.2456	30.8642	51.1939	58.1542	17.6781	11.7872	55.2669	67.5325	25.319	21.875	30.5914	9.2167	24.4604	47.3056	35.2	1.0701	17.3502	24.1379	0.9673	49.949	63.0631	4.315	21.9479	63.3836	47.7583	42.4528	35.3818	44.2478	59.2396	51.3208	35.3448	26.6061	26.5423	20.5168	36.4873	41.5584	38.0952	36.7475	26.6821	33.9068	41.3923	30.1887	35.6587	7.2833	0.9615
ARL6IP1	5560.32	4714.6	4046.54	4396.69	2157.89	4939.3	5237.82	3065.11	3493.46	2707.53	3544.1	4910.39	1887.6	4837.5	3523.45	3736.69	3525.18	4265.8	4764	3374.53	4027.6	3125.52	2600.02	4496.43	4319.82	1296.66	4282.97	2707.12	4000.97	4303.77	5244.88	3992.76	2897.44	3852.08	5779.41	3883.19	3705.88	4455.72	2293.75	3819.91	4972.38	5741.99	5954.76	5669.41	3614.3	2726.79	3880.74	1375.09	3026.92
ARL6IP4	1957.16	2242.24	1369.05	1850.17	896.199	2188.27	1223.3	1823.64	1353.05	2954.47	1179.9	3444.16	1719.03	2243.75	1646.5	2500.35	2470.5	1673.12	1843.2	5041.2	1316.25	1377.24	993.384	1288.48	948.649	2368.93	911.621	1261.24	1341.13	1358.49	1566.11	1440.06	1442.97	1148.68	802.219	1828.03	1966.28	1288.1	1830.55	1117.75	1597.14	1700.55	997.68	1828.97	1452.49	1585.66	1039.48	2470.5	1105.77
ARL6IP5	3287.49	2294.27	1739.18	1788.32	4605.26	5616.26	2883.67	1771.18	2621.79	2846.62	3346.72	2724.68	1862.28	6636.46	3162.47	2460.85	2736.69	4292.36	2135.2	3173.89	3832.02	2969.66	4818.93	3323.14	2837.84	2172.6	6629.04	2798.06	3368.42	1761.32	3542.83	3649.24	3860.3	5197.74	4316.35	3509.41	4592.54	4855.36	3894.25	5927.27	4242.86	2205.63	4559.16	2760.41	2845.72	3607.55	4190.9	2152.95	6825
ARL6IP6	551.297	528.292	863.636	442.549	600.877	762.346	632.665	673.198	841.067	713.128	466.698	2970.13	700.27	579.167	814.412	916.398	833.813	775.147	669.6	294.275	782.334	764.138	691.596	654.434	693.694	1325.78	790.907	523.604	857.7	780.189	790.503	576.83	554.377	535.094	559.09	696.95	697.991	606.585	816.327	634.632	625.714	882.721	822.506	646.223	662.277	476.981	519.405	785.142	783.654
ARL8A	2661.78	561.31	1055.19	2443.08	599.415	1595.68	369.818	702.908	881.183	1650.21	510.561	3840.26	885.498	777.083	844.324	1448.33	1121.58	380.104	357.6	4960.41	1026.03	968.966	813.472	361.876	315.315	1949.3	882.618	486.859	729.045	701.887	651.769	527.755	501.326	555.472	419.853	1070.73	883.07	859.923	692.641	606.926	639.048	741.986	888.631	689.105	1056.44	680	780.454	951.93	1465.38
ARL8B	1976.32	1606.89	2063.85	3376.17	1628.65	3358.02	2728.56	2221.87	3075.98	1344.92	2080.84	2885.71	2010.86	2689.58	1588.72	1278.48	2397.12	2571.93	1808	4942.75	3756.31	3098.62	2044.8	3249.75	2676.58	1715.21	2222.22	2397.55	2846	2312.26	2789.57	2156.07	1986.74	2668.68	3297.77	2223.23	1913.2	2971.37	2198.52	2954.11	2240.95	2017.2	4030.16	2324.61	2507.06	2339.62	2322.52	1884.92	2700
ARL9	1.1274	0	1.0823	5.3319	0	0	4.5845	0	1.3599	5.8936	0.8773	0	32.6482	0	0	3.95	0	3.3197	0	0.535	4.7319	11.0345	0	11.213	0	1.0787	2.3516	1.8372	2.924	1.8868	0.9311	5.6315	1.7683	2.2642	0	2.5957	0	0.892	1.2369	1.7316	0.9524	0.7819	1.1601	0.9973	0	1.5094	2.0184	1.4567	0
ARMC1	529.876	641.354	590.909	595.041	754.386	602.881	829.035	714.918	897.501	490.349	743.033	703.896	600.327	553.125	955.812	359.449	540.288	802.535	1135.2	164.259	958.202	775.172	891.821	939.857	900.901	526.429	1427.4	785.405	976.608	639.623	818.436	747.385	767.462	680.755	1273.48	806.619	850.789	825.134	933.21	825.108	909.524	777.952	685.615	652.206	531.515	793.207	662.04	600.146	525
ARMC10	536.178	799.111	421.353	410.611	683.304	601.409	705.077	564.507	603.821	470.547	626.937	975.455	549.309	858.844	621.849	660.86	366.309	487.729	564.216	185.367	788.076	719.338	543.711	751.366	750.973	714.606	557.601	400.088	712.193	610.641	508.128	848.874	613.192	664.845	649.755	628.715	657.956	372.773	756.617	722.32	492.733	571.399	578.086	563.361	416.566	272.257	535.775	260.197	593.596
ARMC2	78.9177	62.0343	107.143	73.5804	100.877	46.2963	119.198	65.1075	72.752	78.9745	145.624	79.2208	103.275	48.9583	77.4983	52.6666	81.295	74.693	69.6	60.4601	44.164	99.3103	71.5778	90.7238	70.2703	101.402	155.203	126.767	124.756	67.9245	59.5903	103.781	122.016	174.34	136.024	101.233	92.5395	87.4196	143.476	148.918	89.5238	91.4777	56.8445	68.8108	122.295	212.076	90.1559	58.2666	66.3462
ARMC5	4638.11	2609.44	4740.26	1839.51	456.14	1796.3	1583.19	1277.5	1150.43	2381.02	1022.88	4223.38	947.463	881.25	1621.35	3931.56	2221.58	2229.17	2167.2	723.917	1299.68	1231.72	676.12	934.76	623.423	884.574	892.024	1400.87	887.914	1663.21	4344.51	930.008	726.79	701.132	721.89	1239.45	1803.44	1253.31	1055.04	1152.38	3187.62	1032.84	732.019	4068.81	2464.72	874.717	479.037	2039.33	739.423
ARMC6	568.749	922.039	751.45	612.103	393.275	282.922	959.297	1005.04	957.545	1443.6	785.448	540.26	707.959	958.312	926.445	1042.8	811.065	472.002	760.368	694.912	999.787	1047.95	405.759	715.372	716.396	1117.58	446.592	711.752	591.618	718.349	599.944	755.631	609.973	633.894	484.18	764.283	778.006	758.99	959.685	664.788	593.733	864.504	599.652	596.36	615.033	850.981	608.761	2165.02	368.269
ARMC7	376.55	501.277	426.407	249.534	239.766	272.634	375.167	382.427	257.012	363.047	357.042	636.364	236.533	413.542	336.506	394.999	479.856	363.506	318.4	397.004	248.423	228.276	308.558	243.629	222.523	412.082	294.729	338.964	367.446	319.811	386.406	497.989	503.095	310.189	266.692	272.55	347.202	300.616	335.807	295.238	447.619	249.414	383.991	309.15	556.914	315.472	300.071	495.994	454.808
ARMC8	1081.17	901.498	1352.81	1480.14	3489.77	1123.46	1490.74	1261.69	1234.06	1535.88	1353.6	727.273	1133.36	840.625	2015.64	1109.95	731.655	1301.32	948.8	1223.11	1377.76	1195.17	1658.86	1646.28	2457.66	419.633	1307.47	1406.38	1500	1424.53	1211.36	1515.69	1328.91	1080	1257.42	1730.69	1319.94	1193.55	958.565	1476.19	1232.38	1560.59	1502.32	1009.22	993.415	1147.17	1406.84	667.152	664.423
ARMC9	122.886	74.0409	177.489	39.4561	39.4737	11.3169	134.48	217.446	4.7595	21.8064	127.202	12.987	66.6289	62.5	89.7349	67.1499	22.3022	48.9654	138.4	24.077	27.6025	31.0345	44.4943	125.382	71.1712	11.8662	8.6224	228.732	224.172	153.774	107.076	143.202	160.035	100.377	98.5369	55.8079	27.977	43.7098	54.4218	103.896	112.381	78.9679	27.8422	58.8382	48.9182	61.8868	14.8017	23.3066	15.3846
ARMCX1	213.078	420.232	145.022	191.949	5.848	489.712	223.878	278.129	148.904	2.3574	221.945	131.169	149.249	108.333	5.4385	78.9999	214.388	390.063	764.8	72.7662	122.24	77.2414	140.254	185.525	94.5946	62.5674	100.333	170.86	282.651	131.132	464.618	203.54	217.507	118.491	267.763	117.456	215.208	425.502	109.462	222.511	476.19	70.3675	149.652	324.109	164.628	498.868	137.925	259.286	73.0769
ARMCX2	18.0383	22.0122	23.8095	18.1285	40.9357	7.2016	18.3381	12.6422	21.0777	10.0192	22.8086	2.5974	34.647	0	18.3549	5.2667	17.9856	21.578	17.6	11.236	22.8707	11.7241	6.7709	31.6004	6.3063	6.4725	7.8385	11.9418	52.6316	7.5472	23.2775	15.2856	12.3784	7.5472	3.2132	15.5743	44.4763	11.5965	1.8553	3.4632	85.7143	13.2916	11.6009	31.9122	18.8147	76.9811	79.391	56.0816	14.4231
ARMCX3	847.802	810.448	834.416	1279.66	985.38	1154.32	662.464	630.847	751.997	436.128	622.849	705.195	968.118	768.75	582.597	726.799	800	1411.7	1350.4	555.377	574.921	608.276	709.007	566.769	834.234	133.765	888.889	912.172	1080.9	703.774	1591.25	773.13	1010.61	971.321	724.032	875.406	847.92	1055.28	677.798	1037.23	1528.57	556.685	815.545	2225.88	933.208	980.377	820.149	352.513	553.846
ARMCX5	205.186	315.174	290.043	286.857	429.825	269.547	269.723	237.042	350.841	250.479	321.075	236.364	296.499	223.958	290.279	167.216	205.036	269.725	329.6	195.827	295.741	315.172	423.663	256.881	396.396	180.151	460.905	308.651	258.285	248.113	279.33	326.629	386.384	339.623	375.94	324.465	358.68	394.28	228.2	305.628	327.619	240.813	248.26	222.388	162.747	505.66	359.951	243.263	182.692
ARMCX6	128.523	197.109	106.061	135.431	182.749	123.457	113.085	113.78	138.025	150.877	131.588	83.1169	126.595	128.125	117.607	73.7332	253.957	141.087	182.4	186.731	124.606	115.862	109.301	117.227	170.27	67.9612	134.823	127.686	136.452	106.604	198.324	154.465	148.541	134.34	127.455	162.232	170.014	156.999	130.489	135.065	178.095	88.3503	109.049	238.345	132.643	171.321	143.98	198.106	87.5
ARNT	2338.22	1652.91	2079	2035.72	1375.73	2795.27	1571.73	2477.24	1717.49	1765.73	1758.89	1312.99	1828.96	1056.25	1704.28	1470.71	1758.27	2249.09	1812	808.989	1880.13	1674.48	2138.63	2360.86	1877.48	1874.87	1930.63	2211.08	2474.66	2213.21	2712.29	2164.12	2349.25	1441.51	1918.26	1774.82	1631.28	1842.06	1509.59	2142.86	2320.95	1756.06	2788.86	1895.79	1982.13	1961.51	2161.72	1556.45	1668.27
ARNT2	0	0	3.2468	0	0	1.0288	1.5282	0.6321	0	2.3574	0.8773	0	0.6663	0	2.7192	0	0	0.8299	0	0	0.7886	0	0	0	1.8018	0	0.7839	5.5116	7.7973	1.8868	1.8622	1.609	0	0	1.0711	1.2979	0	3.5681	0.6184	0	3.8095	0.7819	0	1.9945	0	3.7736	4.0368	3.6417	0
ARNTL	55.2424	111.061	45.4545	189.816	233.918	58.642	67.2397	84.7029	158.423	116.694	209.663	44.1558	120.598	16.6667	178.79	110.6	92.0863	140.257	32.8	401.284	192.429	146.897	114.138	129.46	129.73	35.5987	103.469	90.9417	66.2768	142.453	53.0726	148.029	129.089	21.8868	22.4921	250.487	294.118	79.3913	7.4212	38.0952	168.571	86.7866	309.745	75.7916	113.829	123.019	273.832	59.7232	348.077
ARNTL2	5.637	24.0133	58.4416	3.1991	74.5614	0	218.529	112.516	166.582	19.4489	115.797	45.4545	92.6142	30.2083	66.6213	231.733	4.3165	3.3197	16.8	37.9882	55.9937	241.379	45.4616	247.706	39.6396	75.5124	36.0572	174.535	112.086	83.9623	1.8622	142.397	239.611	204.528	163.871	16.2232	1.4347	34.7894	137.291	73.5931	9.5238	118.843	18.5615	23.9342	76.1994	36.2264	85.4462	95.4115	37.5
ARPC1A	714.588	748.784	637.446	536.87	611.418	630.658	954.537	739.267	737.93	780.032	675.485	290.312	646.14	752.083	987.485	857.451	634.532	624.931	680.8	1199.81	749.495	780.903	469.125	711.519	773.486	739.115	593.196	713.754	669.591	875.236	683.79	938.858	858.532	1058.11	593.364	959.766	862.862	330.678	951.763	520.346	697.333	895.676	791.868	578.798	689.52	410.332	855.808	468.237	859.615
ARPC1B	2833.33	2615.07	2015.15	3147.48	1843.26	2731.48	2448.71	1794.24	2869.07	5054.65	2755.45	1305.79	2965.81	5147.92	2679.41	4888.47	5282.73	1797.61	1153.6	7439.57	3718.96	4308.06	1404.47	2012.23	1373.36	5290.01	2093.85	2134.83	1455.17	1531.37	1875.8	3175.38	3259.95	3259.62	1426.64	4626.22	3936.28	1647.86	4803.96	2215.58	2229.33	2467.89	4884.47	1847.53	4515.56	1530.05	2712.75	2433.44	6697.12
ARPC2	7058.62	5561.07	4734.85	5756.33	9393.27	9560.7	5278.32	4006.95	5769.85	7674.08	4971.39	5438.96	6381.72	10331.2	7966.69	9821	7869.78	5247.6	4199.2	15311.9	7218.45	7312.42	5477.64	5103.98	3901.8	6213.59	5312.95	4869.51	5492.2	4751.89	5049.35	5318.58	5274.09	5449.81	5014.67	7914.34	7620.52	7958.75	7293.75	6222.51	4790.48	6319	7738.98	5473.95	6701.79	6436.98	7001.21	6843.41	9150.96
ARPC3	4596.39	3999.21	2523.81	2617.97	3883.04	5506.17	2758.36	2132.11	2770.7	2828.94	2410.69	11811.7	2903.02	5360.42	3038.07	6439.81	3811.51	3586.09	2784.8	4565.54	3840.69	2929.66	3297.42	3847.09	3428.83	6031.28	3917.7	2462.77	3743.66	2545.28	3517.69	2707.96	2247.57	3384.15	2657.28	4316.03	3361.55	3396.88	3505.88	3854.55	2869.52	4044.57	5888.63	2996.76	3517.4	2778.87	2708.04	2725.42	6246.15
ARPC4	2064.74	1778.91	1186.47	2239.64	2024.63	2942.64	1491.53	1137.42	1402.77	2865.97	1413.46	4240.57	1418.22	2413.69	1808.45	2314.05	2705.12	1730.95	1413.13	4498.57	1833.28	2035.86	1241.93	1469.43	1609.01	3034.94	1317.54	1066.29	1389.76	1264.23	1513.78	1526.07	1338.31	1399.81	1277.79	2119.48	2013.24	1824.28	1940.68	1437.13	1468.4	1335.64	2713.21	1610.82	2314.1	1542.64	1558.24	2946.93	2363.8
ARPC5	2758.74	1967.09	1524.89	2178.62	3298.25	4572.02	1812.42	1496.84	2423.25	2437.01	1508	1958.44	1485.82	1757.29	3456.15	2248.86	2792.09	2849.12	2149.6	827.715	3643.53	2131.72	2525.54	2237.51	1498.2	1732.47	3027.24	1437.61	2869.4	1589.62	2678.77	2074.01	2059.24	2021.13	1315.25	4369.89	4782.64	3776.88	2131.11	1752.38	2481.9	2067.24	3958.24	2736.47	3125.12	2778.11	3711.86	2155.13	4304.81
ARPC5L	328.072	476.263	506.493	336.977	204.678	275.72	369.054	341.972	319.565	330.043	405.291	279.221	686.278	595.833	355.54	982.232	376.978	490.484	489.6	956.126	451.893	366.897	255.359	388.379	367.568	419.633	356.653	402.348	319.688	415.094	510.242	325.825	309.461	404.528	325.6	510.707	307.03	320.241	575.758	434.632	461.905	659.89	303.944	648.217	424.271	636.981	597.451	414.421	329.808
ARPM1	32.6945	20.0111	7.5758	18.1285	5.848	29.8354	17.574	11.378	14.9584	14.1447	18.4223	10.3896	11.3269	12.5	12.2366	1.3167	16.5468	35.6866	16	5.8855	20.5047	20	1.9345	37.7166	23.4234	19.4175	38.4088	10.1046	7.7973	0.9434	16.7598	18.5036	24.7569	16.6038	2.1421	12.9786	8.6083	20.5168	11.1317	12.987	24.7619	0.7819	10.4408	17.9506	15.0517	15.0943	11.4377	16.7516	14.4231
ARPP19	3479.14	2806.55	4391.77	3327.11	4307.02	2862.14	3720.34	3858.41	3653.92	1841.17	4080.98	6423.38	4062.36	3676.04	4285.52	4110.63	3166.19	3109.72	3080.8	3876.94	4297.32	4057.93	4740.58	4442.41	4960.36	3372.17	5302.76	4350.5	5311.89	4674.53	3627.56	4369.27	4251.99	4416.6	5565.19	3138.87	3280.49	3916.04	4251.08	5145.45	4010.48	3785.77	3694.9	4046.87	3389.46	3775.09	3840.37	3020.39	3618.27
ARPP21	11.274	234.129	0	17.0621	742.69	149.177	0	14.5386	650.009	848.681	1.7545	89.6104	68.6278	0	348.062	3.95	123.022	619.122	0	0	1279.97	218.621	328.871	10.1937	0	166.127	1264.35	0	10.7212	13.2075	474.86	0	0	0.7547	0	471.123	331.42	19.6248	0	4.329	549.524	0.7819	2.3202	117.676	91.2512	1.5094	4.0368	1.4567	0
ARRB1	1429.54	1492.82	1612.55	1411.89	1586.26	1225.31	1494.56	1500	2141.08	2113.45	1298.33	1064.94	2272.71	1745.83	1854.52	1770.91	1306.47	1040.72	1168	604.601	1873.03	2344.14	1476.05	1228.34	581.982	3627.83	1809.92	1898.75	2150.1	1793.4	1490.69	1955.75	2157.38	1803.02	1632.29	1648.93	1553.8	1790.32	1987.63	1633.77	1822.86	1188.43	1490.72	1302.42	1301.98	1836.23	2992.64	2515.66	1973.08
ARRB2	1810.6	1350.75	1379.87	1636.9	2100.88	2567.9	1181.28	1742.1	1888.15	3658.17	1393.08	6624.68	2940.33	2151.04	1649.9	2043.46	3604.32	1110.44	1256	8667.74	1635.65	1933.79	1545.69	1100.92	1121.62	3817.69	3184.01	1185.92	909.357	1055.66	1038.17	1340.31	962.865	1562.26	996.08	2706.03	3263.99	3223.82	1868.89	1255.41	1410.48	1663.02	2801.62	1908.75	3777.99	1334.34	2139.52	6997.81	4311.54
ARRDC1	2228.86	2333.29	2127.71	2275.66	606.725	2120.37	1405.92	1805.31	2053.37	2371.59	1613.27	2228.57	1057.4	1438.54	870.836	2072.43	3366.91	2265.69	1740	5814.34	2029.97	1964.83	478.798	911.315	1505.41	1477.89	1381.93	1652.57	937.622	1343.4	1877.1	1507.64	1801.06	1614.34	1236	1375.73	1661.41	1180.16	1907.85	903.896	1790.48	1734.17	1599.77	2138.12	2396.99	1110.19	956.729	4191.55	1483.65
ARRDC2	542.277	497.275	691.558	448.947	364.035	515.432	479.847	1098.61	1214.35	1367.91	1157.1	1248.05	1205.32	948.958	946.975	1144.18	768.345	594.224	576.8	2529.7	1090.69	1152.41	652.906	363.914	1582.88	1871.63	1041.74	571.371	712.476	904.717	581.006	835.076	938.108	830.943	535.527	897.469	801.291	627.994	893.012	727.273	978.095	818.608	821.346	575.418	891.816	1692.08	1429.04	1539.69	1273.08
ARRDC3	179.256	654.361	207.792	265.529	752.924	1715.02	824.451	962.705	847.187	519.817	1605.37	454.546	1359.23	531.25	218.899	127.716	405.036	775.147	379.2	2280.9	583.596	933.103	615.182	1299.69	1552.25	420.712	1708.8	654.045	941.52	495.283	142.458	1068.38	770.115	793.207	1907.55	501.622	451.937	131.129	296.228	609.524	247.619	1259.58	379.35	155.572	551.27	500.377	939.236	119.447	342.308
ARRDC4	294.25	664.367	81.1688	82.1114	87.7193	543.21	1828.46	571.429	380.078	337.704	1479.05	677.922	675.617	1240.62	600.272	130.35	608.633	672.237	686.4	589.62	1140.38	873.103	301.788	1564.73	2338.74	402.373	257.104	1046.29	489.279	1907.55	434.823	1386.97	1425.29	1862.64	1189.94	445.814	392.396	960.724	918.986	870.996	314.286	555.121	1093.97	747.943	1226.72	452.075	1719.69	322.651	884.615
ARRDC5	405.863	155.086	169.913	389.229	194.444	394.033	121.49	120.733	78.8713	146.751	453.54	128.571	153.246	237.5	128.484	73.7332	62.5899	141.087	60	153.023	164.827	108.276	328.871	188.583	217.117	132.686	122.281	254.453	147.173	111.321	91.2477	222.848	318.302	230.189	257.053	253.082	197.991	57.0904	163.884	174.892	126.667	104.769	358.469	71.8025	198.495	126.038	248.265	191.551	383.654
ARSA	1196.17	525.29	489.178	1205.01	238.304	808.642	479.847	750.316	792.113	567.556	576.355	309.091	245.194	456.25	208.022	355.499	2253.24	766.848	656.8	3171.75	706.625	975.862	287.279	170.234	545.946	912.621	138.742	672.417	341.131	164.151	913.408	513.274	941.645	523.774	405.929	399.74	616.212	52.6302	834.261	170.563	741.905	582.486	836.427	440.788	1741.3	381.132	1303.22	970.867	674.038
ARSB	877.114	817.452	874.459	889.363	621.345	661.523	1039.16	705.436	822.71	636.511	703.557	806.494	355.132	745.833	571.04	564.849	1354.68	575.966	892	486.891	737.382	1102.76	385.94	1267.07	898.198	1190.94	468.744	829.498	532.164	874.528	791.434	979.887	820.513	798.491	886.832	859.182	713.056	1227.44	907.854	564.502	575.238	852.228	1143.85	876.589	1857.01	390.943	228.081	334.304	804.808
ARSD	4597.52	2402.33	2615.8	1411.89	248.538	5825.1	1840.69	3097.98	1108.96	1666.13	1417.64	614.286	1619.08	4251.04	1252.21	3942.09	2520.86	2001.77	1456	733.547	3074.92	1549.66	82.2178	1753.31	1237.84	3941.75	2052.13	5087.22	4185.19	3443.4	2855.68	3317.78	4137.05	2704.15	2571.6	1402.99	1681.49	2209.58	2309.83	2380.09	2834.29	1104.77	2030.16	2720.52	1198.49	1238.49	126.487	951.202	2676.92
ARSE	130.778	0	0	15.9957	0	74.0741	0	0	0.6799	0	9.6498	0	0	0	3.399	6.5833	0	0	0	11.236	5.5205	0	0	23.4455	3.6036	3.2362	3.9193	23.8837	5.848	0.9434	13.0354	13.6766	40.672	0	6.4263	0	0	30.3293	4.329	6.0606	0	5.473	1.1601	29.9177	3.7629	19.6226	0	0	0
ARSG	69.8985	67.037	18.3983	33.0579	23.3918	57.6132	18.3381	17.6991	10.8788	22.9851	122.815	10.3896	5.3303	3.125	42.828	30.2833	28.777	87.1418	47.2	5.3505	27.6025	28.2759	67.7087	26.5036	59.4595	3.2362	18.0286	22.9651	4.8733	24.5283	49.3482	24.9397	10.6101	15.0943	57.8369	35.6911	21.5208	10.7044	12.987	11.2554	58.0952	46.9116	37.123	42.8821	51.7404	12.0755	150.036	26.22	29.8077
ARSK	78.9177	164.091	134.199	124.767	194.444	88.4774	167.335	201.011	138.705	103.138	228.963	212.987	99.9434	112.5	150.918	78.9999	91.3669	163.495	183.2	16.0514	141.956	124.138	236.981	127.421	144.144	81.9849	203.802	165.349	184.21	183.962	192.737	226.87	226.348	186.415	201.358	149.903	104.735	194.464	110.08	241.558	180.952	133.698	113.689	156.569	106.303	200.755	106.976	39.3299	77.8846
ART4	0	7.0039	9.7403	11.7302	5.848	6.1728	9.1691	8.2174	2.7197	106.085	9.6498	0	0	0	103.331	1.3167	4.3165	24.0677	18.4	0.535	0	2.069	9.6727	66.2589	63.0631	0	3.9193	1.8372	0	0.9434	3.7244	4.827	0	4.5283	2.1421	19.4679	5.7389	0.892	0.6184	0	35.2381	2.3456	22.0418	10.9698	2.8222	0	82.755	2.185	0
ARTN	41.7136	385.213	71.4286	36.257	17.5439	25.7202	29.0353	10.1138	190.379	192.132	25.4403	6.4935	61.9649	14.5833	14.9558	68.4665	464.029	39.8363	30.4	138.577	22.082	397.931	6.7709	4.0775	15.3153	91.6936	8.6224	23.8837	81.8713	62.2642	24.2086	20.9171	129.974	476.981	41.7711	76.5737	56.6714	96.34	53.1849	83.1169	50.4762	31.2744	157.773	46.8711	395.108	27.1698	3.364	76.4749	336.538
ARV1	294.25	314.174	215.368	164.223	305.556	248.971	342.311	302.781	291.008	317.077	386.868	418.182	215.878	364.583	391.57	167.216	197.842	303.752	339.2	51.3644	287.855	271.724	182.814	658.512	1082.88	203.883	308.054	304.058	276.803	305.66	269.087	426.388	305.924	377.358	320.245	368.592	362.984	208.737	286.333	367.965	296.19	407.349	366.589	289.205	201.317	248.302	669.441	211.216	186.538
ARVCF	143.179	374.207	244.589	194.082	13.1579	86.4198	182.617	434.892	221.656	254.604	207.909	63.6364	389.113	116.667	142.76	208.033	114.388	346.907	552	124.131	171.136	186.897	135.417	90.7238	172.072	186.624	213.992	139.628	218.324	242.453	545.624	236.524	387.268	252.83	243.129	48.0208	60.2582	51.7381	102.041	84.8485	588.571	118.843	44.0835	373.972	101.599	489.057	669.441	462.491	9.6154
AS3MT	13.9008	59.773	46.5368	8.5311	27.7778	12.3457	2.2923	68.9001	14.9584	3.6894	15.7905	19.4805	10.7606	17.7083	10.2379	87.2948	4.7266	23.2378	31.2	6.1316	10.2524	6.3862	28.0508	9.1743	3.9099	10.7875	46.2473	13.779	88.694	62.2642	10.2421	16.8946	1.7683	6.7925	17.1369	20.1168	27.7331	20.5971	2.8262	2.5974	15.1333	85.7545	11.6009	6.9808	22.9821	9.3887	23.5482	13.7728	6.7308
ASAH1	3529.88	1711.95	2021.64	3254.6	2492.69	6424.9	1657.31	2070.8	1773.92	2330.34	2472.1	1498.7	2501.25	1996.88	2337.87	2025.03	2197.12	2996.85	2504	3635.63	2660.09	2440.69	2103.81	2298.67	1978.38	1236.25	4849.7	1772.9	1895.71	1693.4	3864.06	1823.01	1496.02	1455.85	2619.8	2720.96	2789.1	5007	2235.62	2272.73	3340.95	1928.07	3889.79	2729.49	2064.91	1803.02	2006.3	1644.57	4091.35
ASAM	4.5096	10.0055	15.1515	22.394	17.5439	8.2305	5.3486	18.3312	6.1193	6.483	19.2996	3.8961	5.9966	0	9.5173	2.6333	5.7554	3.3197	12	0.535	10.2524	6.8966	29.018	23.4455	5.4054	12.945	25.8671	21.1279	8.7719	5.6604	7.4488	18.5036	14.1468	5.283	22.4921	10.3829	15.0646	14.2726	9.8949	16.4502	18.0952	11.7279	13.9211	3.989	8.4666	6.7925	31.6218	10.925	7.6923
ASAP1	1613.3	384.212	1062.77	2840.84	644.737	1432.1	1004.78	479.772	1501.95	1374.98	1236.93	762.338	804.211	710.417	1382.73	1506.26	987.77	1164.38	1222.4	1024.61	1423.5	2049.66	944.053	2238.53	3670.27	993.528	1407.02	1357.69	559.454	558.491	1993.48	843.926	557.029	934.34	1618.36	1262.82	1117.65	2421.88	1306.12	921.212	1327.62	1013.29	3625.29	1862.88	574.788	968.302	1522.56	1075.75	1880.77
ASAP1IT1	5.637	5.0028	38.961	47.9872	20.4678	10.2881	10.6972	1.8963	6.7993	1.7681	10.527	7.7922	3.3314	6.25	9.5173	19.75	2.1583	10.789	10.4	1.0701	7.0978	5.5172	19.3454	12.2324	75.6757	6.4725	4.7031	15.6162	3.8986	5.6604	18.622	10.4586	2.6525	5.283	29.9895	9.7339	6.4562	15.1646	4.9474	10.3896	10.4762	13.2916	134.571	3.989	3.7629	7.5472	7.4009	26.9483	70.1923
ASAP2	188.275	181.1	106.061	45.8544	39.4737	94.6502	372.111	241.466	96.5494	5.8936	541.265	12.987	731.585	345.833	198.504	32.9166	64.7482	78.0127	520.8	113.43	32.3344	117.931	6.7709	370.031	58.5586	208.198	43.8957	422.557	334.308	96.2264	195.531	61.1424	932.803	291.321	38.5579	30.4997	22.2382	18.7328	232.529	1331.6	534.286	25.0195	271.462	429.818	306.679	593.207	112.358	1241.81	169.231
ASAP3	3.3822	1.0006	6.4935	4.2655	1.462	3.0864	3.0564	2.5284	0	4.1255	7.018	0	3.9977	0	6.1183	6.5833	2.1583	8.2992	7.2	5.8855	0.7886	2.7586	0	7.1356	2.7027	3.2362	3.9193	0	6.8226	6.6038	8.3799	2.4135	0.8842	0.7547	0	1.9468	1.4347	0.892	0.6184	0	6.6667	3.9093	5.8005	1.9945	6.5851	12.0755	6.728	2.185	0
ASB1	660.812	406.375	1025.31	688.542	663.874	785.885	714.063	1454.43	632.779	893.084	826.389	611.558	520.372	395.125	931.917	414.723	433.525	752.623	427.528	273.943	510.457	601.021	845.585	859.358	790.126	400.432	816.453	1569.02	1024.79	1060.71	434.721	979.743	940.69	655.955	559.818	729.715	835.495	429.899	777.378	573.195	508.6	1123.14	683.84	418.32	621.486	495.615	1012.75	650.051	651.673
ASB12	32.6945	4.0022	10.7684	26.6596	14.6199	27.7778	9.1691	0.6321	9.519	0.5894	4.3863	1.2987	2.6652	17.7083	8.1577	0	8.6331	24.8977	0	14.9813	7.0978	8.2759	0.1064	9.1743	8.1081	0	0.0157	4.593	0	2.8302	12.1043	6.436	6.1892	5.283	6.4263	9.085	12.1951	7.8678	9.8949	7.7922	2.8571	2.3456	5.8005	10.9698	1.8815	9.0566	6.0552	9.7014	0.9615
ASB13	340.474	319.176	189.394	250.6	40.9357	356.996	615.091	380.531	217.576	305.879	704.434	120.779	371.123	788.542	281.441	235.683	310.791	326.989	418.4	196.362	345.426	376.552	158.632	356.779	472.973	549.083	310.406	532.789	179.337	216.981	392.924	450.523	627.763	630.943	784.011	387.411	291.248	299.724	349.413	441.558	280	379.202	327.146	339.068	142.992	390.943	615.616	889.293	250
ASB14	212.052	80.0442	170.996	234.604	302.632	161.523	97.0392	73.957	81.591	61.883	121.938	149.351	129.926	181.25	53.0252	75.0499	91.3669	115.359	104.8	87.7475	67.0347	90.3448	88.9886	199.796	124.324	138.08	119.146	191.069	140.351	115.094	83.7989	98.9541	100.796	151.698	204.571	112.265	86.0832	130.237	115.028	162.771	66.6667	130.571	143.851	85.7641	147.695	97.3585	66.6077	131.828	60.5769
ASB16	71.2514	90.7501	91.9048	89.8747	59.9415	91.7181	55.4422	113.97	73.7107	67.3759	63.2938	113.169	48.3459	26.125	76.261	42.1333	68.9856	49.1895	66.576	33.0016	71.5931	72.3586	80.6508	37.7166	69.3243	50.7012	86.5844	66.4885	46.7836	86.2075	57.7374	52.2043	80.6366	60.9736	51.6141	76.1389	64.3185	54.5927	55.8009	48.4848	58.7048	73.2447	64.2923	48.0379	95.6538	57.2226	48.5765	111.908	32.0962
ASB2	5.637	6.0033	7.5758	31.9915	4.386	11.3169	92.4546	14.5386	25.1572	38.8979	79.83	1.2987	20.655	23.9583	27.1924	9.2167	2.1583	10.789	10.4	31.5677	21.2934	17.931	19.3454	24.4648	26.1261	32.3625	1.5677	13.779	1.9493	6.6038	0.9311	40.2253	42.4403	76.2264	51.4106	61.6483	59.5409	8.0283	29.6846	29.4372	17.1429	20.3284	62.645	11.9671	2.8222	0.7547	43.7323	61.1799	66.3462
ASB3	518.602	555.307	731.667	609.971	932.749	814.815	634.193	692.794	550.739	380.139	593.935	716.883	554.352	787.5	487.423	697.832	294.964	852.33	475.2	600.321	545.741	507.586	700.302	448.522	618.919	340.885	521.262	681.603	671.54	840.566	515.829	477.072	661.362	688.302	700.469	685.918	631.277	646.727	518.862	683.117	558.095	717.748	607.889	405.884	464.723	632.453	642.529	366.351	430.788
ASB6	988.658	940.54	910.087	1315.38	435.819	786.893	775.496	788.407	773.945	1163.49	755.069	997.714	519.232	705.271	857.09	1382.75	898.77	809.597	1025.83	620.08	741.183	647.097	601.621	512.966	525.892	891.672	549.598	607.545	548.372	845.424	957.011	696.227	675.004	469.019	699.827	659.63	777.819	555.712	895.665	581.896	891.829	745.27	680.325	777.043	936.679	682.891	641.99	1183.26	553.221
ASB7	400.226	357.197	437.229	529.992	577.485	466.049	634.957	508.85	652.048	410.196	571.969	566.234	345.804	355.208	545.887	201.45	380.575	571.816	506.4	672.552	702.681	593.103	738.992	547.401	525.225	427.185	705.467	572.289	675.439	473.585	510.242	545.455	601.238	551.698	775.443	532.122	507.174	603.909	403.834	606.926	540.952	454.261	641.531	362.005	493.885	560.755	569.193	442.826	463.462
ASB8	711.387	815.451	462.121	550.253	714.912	1150.21	726.648	661.821	463.029	612.937	756.192	349.351	479.728	1329.17	658.056	624.099	594.964	792.576	826.4	1072.77	626.972	537.931	1000.15	846.075	828.829	617.044	893.592	654.964	910.331	675.472	640.596	832.663	725.906	677.736	845.061	701.492	784.075	774.288	539.27	779.221	776.191	591.869	878.19	674.146	607.714	619.623	726.629	498.908	709.615
ASB9	22.5479	25.0138	3.2468	10.6638	11.6959	36.0082	81.7574	3.1606	2.0398	8.2511	50.0034	0	33.3145	19.7917	10.877	38.1833	10.0719	4.1496	144.8	44.9438	72.5552	1.3793	9.6727	76.4526	27.027	20.4962	2.3516	72.5696	46.7836	2.8302	74.4879	52.2928	17.6835	8.3019	29.9895	12.9786	139.885	98.124	3.7106	53.6797	20	2.3456	11.6009	25.9287	4.7037	84.5283	28.2578	1.4567	0
ASCC1	466.742	408.226	423.16	430.818	565.789	415.638	456.925	391.277	478.667	407.839	444.767	483.117	325.149	714.583	502.379	384.466	358.993	394.213	376.8	506.153	644.322	424.138	462.354	432.212	574.775	394.822	450.715	488.697	848.928	539.623	369.646	576.83	471.264	695.849	735.814	537.313	576.758	431.746	481.138	548.052	340.952	607.506	370.07	386.936	262.465	570.566	454.143	415.149	311.538
ASCC2	1213.08	1567.87	1194.81	1267.93	910.819	1168.72	1346.32	1287.61	1246.3	2098.13	1282.54	536.364	1208.65	873.958	1683.89	1934.18	1985.61	1183.47	1346.4	2689.14	1246.06	1263.45	858.934	1151.89	1306.31	1036.68	942.975	1190.51	916.179	1143.4	1473	1175.38	974.359	1070.19	905.04	1277.09	1412.48	1137.35	1394.56	988.745	1455.24	1203.28	1163.57	1560.71	1361.24	963.774	2429.5	2227.97	871.154
ASCC3	866.967	1015.56	1436.15	1312.72	4103.8	540.124	2145.56	1397.6	1636.58	1002.5	1830.83	989.61	1820.3	810.417	1800.14	394.999	694.964	796.725	1328	566.613	1453.47	2037.93	2206.34	2520.9	2774.77	687.163	1236.92	1577.24	924.951	1219.81	1189.94	1860.82	1534.92	2045.28	1845.43	1263.47	1243.9	1941.07	1792.21	1690.91	1444.76	1369.04	1518.56	1646.47	1179.68	2269.43	1625.5	860.16	879.808
ASCL2	158.963	233.129	176.407	136.497	83.3333	379.63	51.1939	143.489	4.7595	597.024	78.9527	879.221	43.9751	301.042	19.0347	68.4665	243.885	80.5024	56.8	68.4858	53.6278	20.6897	0.9673	192.661	28.8288	330.097	126.984	228.732	77.9727	83.0189	101.49	109.413	135.279	29.434	14.9948	151.849	95.4089	33.8974	207.174	19.0476	100.952	260.36	97.4478	103.715	168.391	13.5849	262.394	581.937	61.5385
ASF1A	488.162	535.296	477.273	342.309	954.678	591.564	614.327	554.994	652.728	389.568	638.64	758.442	555.019	477.083	714.48	156.683	212.23	839.051	602.4	108.079	791.01	476.552	912.133	1099.9	854.054	468.177	815.991	593.417	768.031	498.113	624.767	729.686	668.435	536.604	831.138	648.28	797.704	620.858	410.019	873.593	775.238	473.808	537.123	346.048	270.931	713.207	831.587	337.218	642.308
ASF1B	225.479	406.224	587.662	378.566	131.579	125.514	641.834	814.159	370.559	638.279	221.068	1348.05	412.433	573.958	1343.98	302.833	328.777	127.808	383.2	157.303	285.489	393.103	296.951	533.13	489.189	961.165	224.966	590.662	198.83	414.151	245.81	559.936	228.117	428.679	390.935	518.495	722.382	499.541	918.986	322.078	263.81	703.675	515.081	324.109	357.479	232.453	451.452	1599.42	196.154
ASFMR1	9.0192	5.0028	7.5758	14.9294	7.3099	3.0864	4.5845	3.1606	6.8061	0.5894	10.5446	12.987	13.3258	0	6.1319	0	2.8777	3.3197	8	0.535	4.7319	8.9655	11.6072	8.1549	9.009	4.315	3.1432	12.8604	7.7973	4.717	3.7244	14.4811	10.6101	8.3019	7.4974	1.9468	2.8694	6.2443	4.9474	8.658	7.619	3.1274	10.4408	9.9726	4.7037	6.7925	7.4009	4.37	27.8846
ASGR1	7.8918	14.0077	4.329	9.5974	0	2.0576	3.8204	6.3211	3.3996	2.9468	12.2815	1.2987	9.328	13.5417	1.3596	15.8	14.3885	13.2788	26.4	80.7919	18.1388	13.1034	0.9673	8.1549	18.9189	26.9687	3.1354	8.2674	0	3.7736	32.5885	2.4135	7.9576	9.0566	7.4974	11.0318	7.1736	3.5681	18.5529	4.329	28.5714	9.3823	35.9629	26.926	15.0517	54.3396	39.0227	44.4283	62.5
ASGR2	2.2548	19.0105	3.2468	0	4.386	17.4897	0	11.378	0	45.3809	0	1.2987	1.9989	12.5	6.7981	23.7	81.295	29.8772	1.6	1282.5	0	4.8276	4.8363	3.0581	1.8018	3.2362	0	0.9186	5.848	16.9811	39.1061	0.8045	0	5.283	0	62.2972	48.0631	17.8407	16.0792	9.5238	67.619	27.3651	49.884	52.8546	223.895	3.7736	94.1927	23.3066	222.115
ASH1L	9050.11	4583.99	6904.85	12499.3	11235.1	3219.97	5154.22	5480.08	5624.32	2756.91	6886.93	2799.29	5376.4	2129.46	4484.94	2609.08	3488.99	4804.19	6353.22	1511.46	4390.08	5046.43	7340.74	8388.17	7230.77	4441.88	5987.58	7601.76	6025.44	4786.24	5444.93	6453.21	6319.45	5064.17	7535.47	4480.42	4640.01	6867.34	4359.78	6639.31	6502.37	3359.84	8837.01	8163.2	7923.46	6474.33	7600.69	4435	5197.91
ASH2L	1464.49	1528.84	1116.88	1154.89	1260.23	1221.19	1542.69	1288.87	1244.94	1690.29	1243.07	842.857	1225.31	1919.79	1737.59	892.698	1079.86	1358.58	1784.8	442.483	1525.24	1433.79	1603.73	1995.92	1807.21	1234.09	2603.96	1419.24	1306.04	1293.4	1399.44	1547.87	1544.65	1562.26	2008.23	1682.02	1629.84	1541.44	2054.42	1700.43	1286.67	1218.92	1706.5	1287.46	952.023	1603.02	1422.31	1863.8	1159.62
ASL	527.621	398.22	585.498	362.57	27.7778	318.93	168.863	443.11	418.154	271.106	246.508	146.753	349.135	321.875	308.634	593.816	649.64	334.459	185.6	1062.6	324.921	491.034	23.2144	234.455	257.658	574.973	90.1431	376.627	488.304	363.207	382.682	426.388	537.577	342.642	94.2527	260.221	256.815	123.993	388.992	261.472	374.286	306.489	598.608	306.158	679.21	102.641	137.252	187.181	429.808
ASMTL	650.507	942.711	448.052	438.283	421.053	439.3	388.157	517.067	254.292	1024.9	564.073	219.481	556.351	468.75	688.647	658.332	701.439	521.191	579.2	1002.14	569.401	377.931	301.788	378.185	414.414	862.999	308.838	412.453	441.521	393.396	719.739	283.186	589.337	412.075	366.3	561.324	587.898	585.72	875.43	429.437	676.819	404.222	344.548	580.404	569.144	1001.51	370.716	898.762	181.731
ASNA1	1086.81	1109.61	687.229	633.431	673.977	475.309	695.32	601.138	766.276	1676.73	659.694	1250.65	868.841	806.25	1111.49	1152.08	1338.85	534.47	687.2	1035.85	929.811	886.897	672.251	856.269	856.757	1330.1	602.783	559.429	563.353	637.736	924.581	814.964	526.083	699.623	462.695	913.692	969.871	718.982	775.51	633.766	866.667	706.802	716.937	772.875	812.794	586.415	605.524	1294.97	551.923
ASNS	3349.49	595.329	403.68	2047.45	538.012	2948.56	354.537	710.493	654.088	257.551	647.412	266.234	115.934	251.042	397.689	259.383	944.604	2502.21	1684	825.575	412.461	493.103	206.995	322.12	606.306	211.435	688.223	1255.73	398.635	832.076	1881.75	675.784	776.304	753.962	1075.34	606.749	411.047	202.492	387.755	470.996	1297.14	430.805	329.466	1561.71	357.479	169.811	448.088	494.538	92.3077
ASNSD1	773.394	719.398	637.446	531.058	766.082	771.605	738.873	733.881	748.598	447.326	752.683	475.325	641.636	721.875	813.052	646.482	484.892	956.07	676.8	292.135	958.202	696.552	702.236	965.341	975.676	247.033	823.045	801.94	964.912	637.736	801.676	836.685	755.968	763.019	765.803	776.768	730.99	696.681	638.219	970.563	800.952	677.091	513.921	795.812	492.004	655.849	743.449	318.281	585.577
ASPH	1705.72	1412.7	1806.76	1427.61	2413.76	2118.31	1668.93	1489.04	1379.57	1273.78	1652.95	1722.56	1595.9	1460.16	858.6	981.481	1752.94	1952.77	3658.4	543.606	1286.82	955.807	1020.47	1738.23	1297.48	411.003	5529.63	1889.72	1656.92	2213.64	2600.13	957.916	1396.82	1718.14	3581.51	1588.07	1470.06	2395.14	2039.61	3193.1	2746.74	2006.18	1680.55	2996.3	1845.8	1200.6	830.759	2203.34	1378.85
ASPHD2	93.5738	67.037	76.8398	89.5761	39.4737	92.5926	74.8806	42.9836	106.748	38.3085	64.9167	146.753	107.272	63.5417	49.6261	44.7666	82.0144	61.4142	87.2	168.539	69.4006	53.7931	62.8724	88.685	28.8288	70.1187	59.5728	68.8952	116.959	60.3774	87.5233	53.9019	73.3864	46.0377	200.287	77.2226	60.2582	90.0957	63.6982	30.303	77.1429	71.9312	87.007	59.8355	174.036	172.83	98.9023	544.064	150
ASPM	579.481	517.286	1275.97	2506	1423.98	133.745	3052.53	977.244	1333.33	933.549	806.195	514.286	417.763	400	1458.19	218.566	481.295	406.662	1080.8	67.4157	695.584	1108.97	850.228	2857.29	2945.05	625.674	622.379	1366.88	307.992	660.377	524.209	1367.66	196.286	2006.79	3118.91	1423.75	1190.1	1693.98	641.929	1436.36	848.571	2347.93	2544.08	939.417	863.594	360	2297.63	338.674	231.731
ASPN	83.4273	37.0205	124.459	78.9123	219.298	31.893	83.2856	72.0607	19.7178	9.4298	89.4798	109.091	45.3077	26.0417	114.888	14.4833	7.1942	19.9181	58.4	0	41.0095	59.3103	147.025	215.087	107.207	108.954	67.4113	200.255	94.5419	49.0566	28.8641	111.826	83.1123	58.8679	95.3238	49.3186	42.3242	120.425	63.0798	101.299	42.8571	56.294	209.977	53.8519	60.207	49.8113	45.0779	69.1916	39.4231
ASPRV1	88.9515	78.7635	110.53	132.029	87.383	39.0947	60.8672	53.976	104.613	105.107	59.0654	42.2597	43.3821	17.7083	95.2821	57.2222	29.3741	70.0205	28.68	28.5019	95.7808	31.069	112.029	75.5861	44.3964	81.3053	59.8707	51.2397	61.0234	51.3396	64.2179	59.0105	61.1141	34.7547	47.8547	82.6022	67.6255	112.441	20.4947	61.29	69.819	49.5622	32.4826	62.4383	33.6218	112.619	67.6976	138.951	71.1538
ASPSCR1	254.791	372.206	334.416	411.624	119.883	268.519	277.364	318.584	381.438	515.102	346.515	464.935	250.525	368.75	216.859	574.066	430.935	239.018	217.6	913.858	416.404	354.483	184.748	230.377	343.243	405.61	296.296	236.081	223.197	286.793	236.499	256.637	194.518	277.736	149.947	303.05	322.812	261.367	222.016	195.671	258.095	490.227	351.508	238.345	268.109	320	193.095	829.57	234.615
ASRGL1	603.157	27.0149	203.463	299.653	691.52	912.551	444.699	180.152	88.3903	466.775	85.0935	81.8182	78.6221	342.708	210.741	545.099	165.468	350.227	268	494.917	104.89	124.138	1.9345	410.805	48.6486	162.891	232.02	461.139	175.439	237.736	41.8994	437.651	446.507	370.566	147.805	411.421	391.679	512.921	484.23	135.065	556.191	384.675	723.898	409.873	332.079	111.698	721.247	24.035	223.077
ASS1	233.371	782.432	4.329	99.1736	0	423.868	0	3.1606	2.0398	2.3574	0	1.2987	1.3326	0	1.3596	6.5833	568.345	1161.89	1295.2	1.6051	18.1388	1.3793	7.7381	6.1162	0	106.796	0	2.7558	0	48.1132	591.248	25.7442	0.8842	4.5283	0	2.5957	1.4347	0.892	37.1058	0	198.095	70.3675	5.8005	1394.17	214.487	3.0189	7.4009	14.5666	0
ASTE1	173.179	246.726	238.42	209.587	262.88	204.979	249.169	319.235	225.647	149.15	240.613	102.546	141.64	102.99	177.498	134.102	152.043	276.862	252.712	95.7999	217.035	190.241	296.293	196.473	240.189	142.104	195.054	277.032	328.129	318.34	227.682	288.455	257.825	243.268	333.001	286.775	248.486	237.309	187.644	253.472	193.609	345.176	252.9	120.11	231.721	210.559	352.684	153.234	176.154
ASTN1	95.8286	50.0276	1.0823	28.7923	0	95.679	0	3.1606	0	0	0	0	0	0	1.3596	0	100.719	229.059	72	0	0	0	0	7.1356	0.9009	0	0	0.9186	0.9747	0.9434	34.4507	0	0	0	0	0	0	0	0	0	49.5238	0.7819	0	82.7724	20.6961	0	0	0	0
ASTN2	4.5096	3.0017	3.2468	2.1328	1.462	9.2593	9.1691	0	10.1989	1.7681	19.2996	0	1.9989	14.5833	8.1577	5.2667	0.7194	4.1496	8	4.2804	8.6751	7.5862	2.9018	23.4455	15.3153	1.0787	0.7839	19.2907	18.5185	4.717	6.5177	53.9019	18.5676	16.6038	6.4263	3.2446	2.8694	0	6.1843	0.8658	9.5238	5.473	19.7216	1.9945	1.8815	9.0566	11.4377	7.2833	0
ASXL1	4307.78	3871.14	3915.58	6846.17	2777.78	3434.16	3258.07	3371.68	3612.44	3261.53	3523.05	1437.66	3372.76	2033.33	3415.36	4584.63	3636.69	3925.53	3656.8	5290.53	3404.57	3231.72	3064.3	3006.12	3209.01	2565.26	3543.8	3403.42	2489.28	3821.7	3564.25	3123.09	3085.76	2847.55	3259.22	2865.02	2850.07	2705.55	2471.24	2940.26	3960	3865.52	2401.39	3733.73	3448.73	3201.51	2980.53	3855.79	1650.96
ASXL2	1278.47	757.418	1925.32	1875.77	2957.6	614.197	2001.91	1522.76	1835.12	1374.98	2003.64	1290.91	2021.52	446.875	1670.29	621.466	1306.47	1068.94	1636.8	112.895	1348.58	2502.76	1822.33	2094.8	2590.09	1552.32	1026.06	1973.16	1263.16	1252.83	1615.46	1996.78	1731.21	1553.96	1941.82	1548.99	1504.3	2220.28	1471.24	1619.91	1940.95	1013.29	2830.63	1507.85	1845.72	2612.83	2054.75	1286.23	1532.69
ATAD1	674.183	740.409	827.922	941.616	1621.35	619.342	1039.16	865.992	1089.92	704.877	1216.75	940.26	765.566	732.292	1168.59	362.083	469.065	885.527	974.4	494.382	1085.17	1074.48	1620.17	1347.6	1855.86	752.967	1151.48	894.719	822.612	742.453	770.019	1052.29	880.637	1169.06	1299.19	1052.56	836.442	1151.62	941.868	1488.31	818.095	802.189	878.19	876.589	606.773	897.359	1239.31	643.117	697.115
ATAD2	1059.75	1131.63	2439.39	2410.02	1849.42	853.909	2435.15	2155.5	1769.17	1377.34	1643.09	1216.88	1335.24	1712.5	3155	1469.4	1174.82	1079.73	2151.2	1268.59	1304.42	1706.21	1717.87	2251.78	2695.5	932.039	2023.91	3047	1496.1	2041.51	1151.77	2044.25	1237.84	2507.17	4165.33	2116.16	2203.01	3075.74	3160.79	2065.8	1417.14	2751.37	2400.23	1550.74	1489.18	1215.85	1745.93	1693.37	678.846
ATAD2B	901.917	764.422	1882.03	1525.99	3204.68	765.432	1171.35	1401.39	1223.87	740.828	1348.34	2070.13	1141.35	639.583	1096.53	391.049	637.41	1180.15	1128.8	535.581	895.899	1113.1	2349.49	1542.3	1192.79	943.905	1700.18	1870.27	1490.25	1046.23	1162.01	1382.14	1461.54	1200.75	1692.26	1306.29	1100.43	1296.13	1111.32	1467.53	1246.67	846.755	1722.74	980.304	1357.48	1307.17	1445.18	803.35	933.654
ATAD3A	683.202	621.343	744.589	544.921	274.854	323.045	602.101	623.894	647.289	984.235	602.673	412.987	512.376	675	860.639	829.499	855.396	355.207	497.6	1037.99	600.158	860	226.341	552.497	827.928	731.392	219.479	580.557	274.854	567.924	492.551	653.258	419.982	484.528	324.529	626.217	619.082	355.031	799.629	343.723	527.619	634.871	403.712	523.56	570.085	431.698	698.371	2140.57	123.077
ATAD3B	727.17	731.404	648.268	943.748	463.45	474.28	546.323	669.406	868.264	1036.1	722.856	293.507	585.668	420.833	683.209	813.699	851.079	582.605	550.4	1554.31	736.593	833.103	295.984	226.3	652.252	466.019	311.19	566.778	378.168	634.906	470.205	539.823	507.515	470.189	292.398	682.025	682.927	394.28	957.947	245.887	264.762	823.299	315.545	315.133	743.18	689.057	1021.32	2045.88	195.192
ATAD3C	12.4014	11.0061	2.1645	46.9208	1.462	3.0864	6.1127	5.0569	22.4375	11.1979	7.8953	3.8961	13.9921	15.625	5.4385	10.5333	3.5971	9.9591	6.4	34.778	20.5047	15.8621	3.8691	3.0581	4.5045	133.765	2.3516	8.2674	0	2.8302	9.311	12.8721	31.8302	7.5472	1.0711	6.4893	5.0215	4.4602	24.7372	5.1948	2.8571	7.8186	25.522	4.9863	10.3481	15.8491	38.3499	33.5033	0
ATAD5	726.043	760.42	1319.26	1299.92	2124.27	517.49	1411.27	1250.95	1091.28	555.179	884.271	658.442	988.773	368.75	1673.01	655.699	511.511	794.235	947.2	233.815	802.839	1024.83	1270.02	1835.88	1786.49	823.085	1360.77	1649.81	900.585	1020.75	568.901	1181.82	875.332	1164.53	1335.6	1254.38	1327.12	1613.69	1410.64	1233.77	859.048	1318.22	1223.9	830.716	773.283	692.83	886.757	477.786	459.615
ATE1	314.543	201.111	353.896	454.279	529.24	206.79	364.47	402.655	473.908	400.766	435.995	293.507	479.062	201.042	397.689	185.65	318.705	293.792	360	135.902	361.987	508.276	411.089	380.224	473.874	274.002	470.312	410.615	379.142	293.396	429.236	418.343	332.449	480	441.274	376.379	406.743	507.569	327.767	460.606	416.19	316.654	274.942	402.892	338.664	613.585	428.577	313.911	245.192
ATF1	411.499	390.216	432.9	396.694	619.883	510.288	520.344	417.193	582.016	397.819	464.067	1045.45	435.087	452.083	501.02	294.933	339.568	595.054	435.2	96.3082	624.606	524.138	766.076	757.39	820.721	420.712	653.733	514.418	674.464	286.793	516.76	499.598	396.994	534.34	563.374	561.324	571.736	624.426	473.717	786.147	534.286	537.92	755.22	339.068	293.509	686.038	723.265	388.929	837.5
ATF2	969.56	556.307	880.952	1161.29	1247.08	336.42	1201.91	872.313	994.051	559.894	1007.96	624.675	1004.76	346.875	824.609	322.583	617.986	707.923	1131.2	646.335	810.726	1108.97	1029.17	826.707	825.225	638.619	911.621	1106.92	706.628	629.245	957.169	1008.05	1106.98	1095.85	1116.04	826.087	863.702	1312.19	750.773	1032.03	1073.33	605.942	943.155	1082.02	994.356	1248.3	1035.45	698.471	457.692
ATF3	779.03	185.102	219.697	119.435	35.0877	114.198	204.775	60.6827	38.0758	230.44	142.115	331.169	5796.72	580.208	240.653	1770.91	138.849	229.888	67.2	1179.24	95.4259	145.517	63.8397	170.234	368.469	63.6462	439.741	204.848	115.01	1060.38	609.87	254.224	252.874	267.925	111.39	117.456	10.043	363.951	512.059	449.351	154.286	1339.33	32.4826	469.708	349.953	2323.77	113.031	133.285	125
ATF4	10409.2	8373.63	8797.62	8704.88	4429.82	10401.2	4644.13	4509.48	4463.71	6882.57	4230.99	25967.5	6690.21	6161.46	5983.68	19307.6	9169.06	11117.6	7652	13432.9	6939.27	5179.31	4817.96	3438.33	4805.41	9558.79	5182.83	5557.55	4582.85	6866.98	11560.5	3222.04	3542.88	4829.43	4688	6909.8	4452.65	5232.69	7296.23	6126.41	9401.9	7974.98	4193.74	14347.5	7761.99	6356.98	7347.7	7598.69	5168.27
ATF5	325.817	285.158	390.693	218.608	127.193	276.749	285.769	216.182	176.781	311.183	214.05	949.351	167.905	381.25	246.091	423.966	238.13	556.048	196	416.265	280.757	234.483	359.824	504.587	348.649	323.625	93.2785	288.441	222.222	250.943	461.825	260.66	202.476	203.019	234.561	350.422	226.686	230.145	230.056	206.926	327.619	292.416	325.986	315.133	231.421	225.66	125.814	412.964	470.192
ATF6	2033.82	1540.85	1713.2	1623.03	3397.66	1792.18	2321.3	1816.69	2015.3	1776.93	1994.87	914.286	2624.51	1856.25	2155.68	1124.43	1826.62	1720.43	1675.2	1455.86	1939.27	2108.97	2729.63	2570.85	2236.04	1019.42	2397.02	1979.59	2087.72	1604.72	2049.35	1838.29	1980.55	2070.19	2361.67	1804.67	2177.19	2657.38	1820.66	2291.77	1804.76	1703.67	2689.1	1821.99	1947.32	2864.91	2241.79	1469.05	1975
ATF6B	3952.8	3756.57	3376.45	3652.74	2646.2	3230.45	3393.31	3562.84	3148.05	5543.54	3392.34	6779.53	3084.92	3591.67	4031.95	4235.95	4159.64	2352	3440.8	4682.18	3321.77	3782.07	2827.96	2067.28	2881.98	4666.67	2613.36	3013.02	2241.72	3104.52	3804.73	3328.42	3583.42	3339.62	2594.09	3792.71	4033.87	3265.01	4110.7	2657.14	3586.67	3422.99	3249.42	3359.76	3679.21	2861.74	3004.26	4864.78	2686.54
ATF7	2627.93	2579.49	3017.76	3814.34	3436.84	1398.36	3310.62	2924.87	4399.68	3290.29	2777.14	3443.45	4233.67	1609.56	3299.38	1423.31	2966.17	2085.02	2892.54	1104.18	3244.42	3584.5	3446.03	2685.82	2579.44	7247.89	3351.59	3403.53	3395.11	2844.77	3077.65	2990.36	4214.02	2862.26	3348.49	2911.81	3197.86	3547.86	3038.5	3631.39	2858.08	1689.41	3063.84	2723.44	3662.39	4350.72	2279.66	4377.51	3648.07
ATF7IP	1910.94	2247.24	2357.14	3147.96	8687.13	1521.6	3488.06	1603.03	3323.47	2245.47	3841.49	1437.66	4384.18	1663.54	3356.22	751.815	1766.91	1728.73	3409.6	1127.34	3159.31	3066.21	2899.87	3651.38	3787.39	2966.56	1867.92	3617.46	3147.17	1806.6	2383.61	3788.42	3305.92	2697.36	3568.75	3033.1	3276.9	3480.73	2473.72	3235.5	3164.76	1461.3	3476.8	2861.13	2292.57	7807.55	4063.74	2179.17	1532.69
ATF7IP2	418.264	628.347	275.974	956.545	945.906	589.506	638.013	213.022	817.27	398.409	596.532	240.26	532.365	432.292	428.28	172.483	339.568	540.279	551.2	195.292	628.549	637.241	419.794	591.233	1551.35	537.217	609.053	1079.36	986.355	275.472	371.508	967.82	834.66	654.34	700.469	500.325	245.337	226.577	393.321	732.467	299.048	44.5661	494.2	401.895	410.16	1292.83	699.044	658.412	228.846
ATG10	140.924	132.073	143.939	142.895	255.848	197.531	180.325	185.841	101.989	90.1724	114.92	222.078	114.602	187.5	257.648	127.716	118.705	151.876	90.4	78.6517	97.7918	124.828	117.039	141.692	138.739	154.261	139.526	229.651	161.793	155.66	185.289	155.269	156.499	141.132	162.8	149.254	125.538	119.533	129.252	238.961	98.0952	124.316	163.573	146.597	124.177	122.264	58.534	29.8616	114.423
ATG12	540.023	555.307	672.078	691.016	956.14	766.461	592.932	654.867	633.69	446.147	667.589	1085.71	490.389	566.667	592.114	738.649	571.223	1025.78	570.4	482.611	664.038	657.241	761.24	643.221	637.838	407.767	790.907	687.115	745.614	646.226	648.045	652.454	574.713	704.151	690.83	763.79	606.169	610.153	554.113	922.944	680	602.815	647.332	623.286	590.781	473.207	381.48	184.268	749.038
ATG16L1	465.614	571.316	654.762	720.874	596.491	518.519	462.273	572.693	602.414	556.358	564.073	303.896	481.727	272.917	505.778	451.616	515.827	797.555	598.4	823.435	520.505	547.586	505.881	280.326	436.937	286.947	468.744	513.499	412.281	616.038	484.171	489.944	440.318	466.415	501.253	637.249	655.667	462.075	474.954	360.173	553.333	659.89	395.592	488.656	748.824	676.981	752.196	541.151	275
ATG16L2	9986.71	8012.83	9666.27	16233.9	4646.97	12178.7	5041.66	7650.58	6642.69	5951.73	6101.41	3416.99	5357.07	2555.35	3450.78	6098.16	9102.86	8550.6	5717.43	7077.89	4804.42	4203.39	3743.16	2647.54	2963.51	4055.9	6371.25	7973.16	4615.47	6471.76	5070.91	4931.14	8163.79	7927.13	4664.63	6175.46	5255.39	5083.77	6600.4	4247.7	4319.33	7676.33	4647.59	6171.2	11082.6	3659.27	8401.61	11096.8	7350.42
ATG2A	1236.75	1025.57	1216.45	1443.88	494.152	776.749	1185.86	1503.16	996.09	2088.11	1567.65	762.338	876.17	622.917	1331.75	1544.45	1125.9	751.909	1145.6	2308.19	893.533	1004.14	692.564	759.429	1176.58	1023.73	841.858	1210.72	730.019	997.17	1075.42	1375.7	1336.87	1067.17	884.69	884.491	1173.6	851.895	1012.37	880.519	1362.86	832.682	919.954	1036.15	970.837	1124.53	1446.53	2251.27	603.846
ATG2B	2237.88	1661.92	2715.37	3450.81	3948.83	2056.58	2825.6	2594.82	1980.62	1982.61	3298.47	1497.4	2210.08	877.083	2205.3	892.698	2162.59	2895.6	2641.6	769.93	1820.19	1794.48	2310.8	2626.91	3196.4	728.155	2469.14	3141.62	2277.78	2436.79	2226.26	2238.13	2519.89	2356.23	3468.07	2061.65	2132.71	2207.79	2090.29	3002.6	3011.43	1971.85	1955.92	2592.87	2493.89	2347.17	2527.73	1624.91	1336.54
ATG3	799.324	945.522	819.264	607.838	1017.54	958.848	694.556	678.888	943.736	1021.95	734.26	992.208	977.446	1601.04	1108.77	1340.36	767.626	944.451	780.8	2245.05	1097	849.655	707.073	1358.82	1395.5	667.745	721.928	868.998	1181.29	787.736	849.162	853.58	635.721	1135.85	758.306	1342.63	1082.5	945.559	1152.75	1127.27	879.048	1233.78	2493.04	823.735	648.166	852.076	976.913	648.216	2507.69
ATG4A	223.224	257.142	161.255	226.073	270.468	344.65	197.899	191.53	192.419	251.658	236.858	89.6104	146.584	172.917	397.689	140.883	217.266	350.227	208.8	218.834	235.016	208.965	193.453	312.946	577.477	70.1187	218.695	207.604	257.31	187.736	270.019	227.675	232.538	287.547	198.145	281.635	213.773	219.441	162.028	204.329	284.762	287.725	349.188	238.345	249.294	249.811	335.057	104.88	212.5
ATG4B	1792.56	2293.27	1336.58	2097.57	783.626	1295.27	973.448	2165.61	1783.44	2193.61	1425.54	688.312	1055.4	726.042	1358.26	1674.8	2200.72	1683.08	1661.6	2471.91	1380.13	1153.79	1111.39	652.395	1029.73	918.015	949.245	1211.64	965.887	1366.98	1439.48	1152.05	1243.15	1344.15	871.838	1369.89	1197.27	947.343	1264.69	730.736	1323.81	1519.16	754.06	1507.85	1708.37	1283.02	1151.17	2842.68	747.115
ATG4C	240.135	317.175	265.151	260.197	475.146	222.222	347.66	354.614	352.201	263.445	244.754	492.208	333.145	273.958	392.93	239.633	156.834	357.696	291.2	40.1284	388.801	318.621	549.408	478.084	367.568	210.356	569.077	317.837	349.902	314.151	373.371	383.749	315.65	370.566	414.498	527.58	588.953	448.695	335.189	468.398	287.619	455.825	320.186	233.358	190.028	431.698	538.244	167.516	392.308
ATG4D	437.362	375.738	406.093	391.8	235.746	283.807	264.833	446.504	165.48	1239.72	318.373	1244.04	196.655	320.76	645.466	637.647	667.453	298.515	287.928	2128.36	174.59	198.09	349.261	282.977	285.739	303.808	293.333	210.461	213.275	322.566	348.138	254.811	311.141	253.668	277.167	390.746	416.815	197.488	435.405	244.069	411.895	367.013	266.137	365.036	373.236	252.785	315.687	571.398	172.115
ATG5	695.603	526.291	755.411	592.909	754.386	735.597	547.851	670.038	582.016	350.67	600.918	693.506	481.061	632.292	662.135	679.399	465.468	774.317	476	457.464	775.237	547.586	772.847	563.711	677.477	259.978	634.921	525.441	882.066	664.151	713.222	651.649	556.145	631.698	574.085	637.898	624.821	615.505	432.9	623.377	579.048	737.295	529.002	528.547	628.41	568.302	605.524	252.003	498.077
ATG7	1768.39	760.13	958.149	2105.87	627.222	1286.52	662.457	660.645	1145.35	532.412	882.7	103.558	533.691	828.271	506.778	673.842	1114.48	949.439	1041.7	854.232	1200.35	972.538	371.15	787.013	778.703	870.949	413.341	1262.83	728.207	876.066	1003.61	920.032	868.081	805.592	701.829	717.372	625.38	1581.82	1012.49	945.905	1072.75	1034.47	2076.72	1050.97	1276.72	720.468	577.542	1302.85	1927.6
ATG9A	1274.68	1481.93	860.022	1516.05	329.693	1028.64	521.215	1217.04	904.103	1887.9	1272.87	476.584	724.256	551.042	1105.32	319.949	1820.55	1298.34	1423.5	1073.37	1150.14	914.428	514.074	722.681	1488.57	1181.88	504.801	482.964	652.836	864.859	2263.28	858.866	865.579	685.034	443.181	596.853	766.829	496.427	565.152	731.792	1975.44	607.529	939.455	1457.07	1328.98	1433.13	1338.2	1476.48	852.904
ATG9B	10.1466	16.0088	64.6861	3.5297	0	0	11.3849	42.3515	16.291	17.6809	38.5026	99.1818	24.7993	25	2.3046	30.2833	10	20.4327	14.4	30.9524	103.423	20	8.6087	12.2324	17.1171	62.74	30.3978	13.7056	13.6452	37.5	5.0279	14.2397	7.6835	13.5849	29.0148	11.5574	8.5868	4.4602	2.4737	10.6667	11.7714	54.6286	6.8445	4.9863	12.6246	64.3849	57.8343	115.098	0
ATHL1	1174.75	1249.69	1183.98	1655.03	51.1696	1474.28	472.206	1378.63	1659.02	894.652	1786.09	1149.35	843.522	272.917	239.293	900.598	1838.13	3486.5	904.8	2753.88	2074.92	1761.38	553.277	91.7431	1058.56	291.262	779.149	362.848	279.727	1188.68	808.194	107.804	502.21	504.906	328.813	618.43	1172.88	545.927	557.823	285.714	1145.71	1886.63	450.116	1225.63	2788.33	873.207	5597.06	3979.61	405.769
ATIC	1412.63	1179.65	1072.51	1101.57	1694.44	819.959	2111.17	1673.2	1593.06	1495.8	2016.8	422.078	1331.25	2654.17	2108.09	1942.08	797.122	685.516	1100	1298.02	1729.5	1871.72	1418.98	2612.64	2899.1	1030.2	1349.01	1886.81	1705.65	1486.79	1110.8	2046.66	1445.62	2014.34	1834.71	1670.99	1588.95	1562.85	1602.35	1985.28	1330.48	1876.47	1495.36	1174.77	609.596	2083.77	1733.15	1169.7	869.231
ATL1	201.804	17.0094	331.169	156.758	228.07	11.3169	130.659	238.306	158.423	107.264	57.8987	118.182	148.583	61.4583	148.878	190.916	5.036	57.2646	78.4	11.771	126.183	188.965	183.781	69.317	29.7297	157.497	344.895	158	340.156	217.924	98.6965	162.51	184.792	59.6226	114.603	123.945	73.8881	102.584	74.8299	45.0216	348.571	172.009	33.6427	76.7888	7.5259	76.9811	103.612	31.3183	42.3077
ATL2	1109.36	812.449	1233.77	1599.57	1305.56	1309.67	1049.86	1120.1	1182.39	876.381	877.253	2125.97	790.219	583.333	1001.36	1013.83	902.878	1407.55	1059.2	1529.69	1033.12	924.138	955.66	1118.25	998.198	700.108	1119.34	1290.64	888.889	951.887	1213.22	838.294	728.559	1069.43	1207.08	1173.26	1020.09	1039.22	1044.53	1074.46	1024.76	1344.8	776.102	937.422	845.72	1168.3	1075.14	705.025	635.577
ATL3	835.4	447.247	617.965	1185.82	811.404	560.7	599.045	453.224	945.096	612.937	671.098	515.584	842.189	338.542	761.387	351.549	712.95	508.742	836	521.134	861.987	1089.66	479.765	1050.97	557.658	984.898	678.033	725.696	580.897	418.868	854.749	588.898	513.705	627.924	670.48	860.48	709.469	1019.6	727.891	616.45	826.667	594.996	1103.25	825.729	851.364	758.491	867.918	568.099	581.731
ATM	3123.97	2462.33	2863.64	4175.92	4814.33	2556.58	3549.95	2642.21	4825.42	2123.47	7252.23	1303.9	3771.18	1242.71	1957.17	1084.93	2160.43	5217.65	3952	753.879	4443.22	4333.78	2469.43	4820.59	6123.42	1608.41	2027.83	5552.9	5429.82	3471.7	3192.74	4826.23	3221.88	2839.23	4565.9	3164.18	2812.76	2752.83	2229.42	3234.55	4003.81	3772.48	6126.45	4144.6	3076.2	3504.11	9348.62	1892.21	3739.42
ATMIN	1114.99	1094.6	929.654	774.193	1368.42	1131.69	1271.44	1081.54	1048.44	1077.35	1369.39	670.13	1248.63	903.125	1189.67	895.332	1072.66	1188.45	905.6	1040.13	1160.09	948.276	1564.07	1552.5	1473.87	566.343	1397.61	1264	1537.04	1089.62	1387.34	1279.16	1121.13	1160.75	1208.15	1140.82	966.284	967.86	766.852	1164.5	1280.95	1035.18	988.399	1248.57	939.793	1352.45	1162.61	727.604	975.962
ATN1	2897.41	4079.25	4541.13	1281.79	51.1696	1350.82	2783.57	4175.73	2826.45	292.913	2598.42	6838.96	3750.54	1770.83	341.944	3620.83	4186.33	1986.83	3012.8	7639.91	1276.03	2505.52	630.659	1505.61	1651.35	3378.64	1866.35	2112.79	1883.04	3529.25	4626.63	2553.5	3307.69	2535.85	1900.05	188.838	170.014	1423.69	2322.82	1006.06	3500.95	2504.3	1561.48	3678.88	4597.37	3033.96	1341.57	8474.87	1741.35
ATOH8	10.1466	7.0039	8.658	25.5932	2.924	8.2305	7.6409	0.6321	3.3996	17.0915	2.6318	3.8961	1.3326	0	14.9558	7.9	7.1942	1.6598	1.6	3.7453	0.7886	0.6897	0	3.0581	1.8018	3.2362	0	0	4.8733	6.6038	3.7244	0.8045	0.8842	1.5094	1.0711	12.3297	11.4778	9.8124	3.0921	3.4632	5.7143	13.2916	9.2807	7.9781	15.0517	10.566	3.364	0.7283	0
ATOX1	370.913	333.184	246.753	359.371	211.988	519.547	244.508	194.69	155.703	291.734	160.537	672.727	186.561	564.583	167.913	433.183	454.676	261.425	255.2	979.133	187.697	218.621	170.239	258.92	263.964	302.05	198.315	233.325	295.322	265.094	212.291	255.833	170.645	280.755	151.019	282.933	229.555	111.505	262.832	195.671	178.095	372.948	248.26	248.317	310.442	193.962	77.3726	158.776	177.885
ATP10A	18.0383	52.0287	22.7273	21.3276	1119.88	3.0864	15.2818	19.5954	889.342	1033.15	249.14	6.4935	1238.63	2.0833	658.736	18.4333	32.3741	47.3056	41.6	35.313	70.1893	164.828	1034.98	14.2712	68.4685	853.29	43.1119	7.3488	17.5439	29.2453	22.3464	60.3379	4.4209	21.8868	101.75	482.803	657.102	78.4992	486.085	73.5931	107.619	46.1298	8.1206	114.685	1320.79	1156.23	962.784	1763.29	348.077
ATP10B	11.274	3.0017	7.5758	1.0664	33.6257	17.4897	2.2923	5.689	33.9963	3.5362	2.6318	6.4935	4.664	4.1667	16.9952	2.6333	2.8777	6.6394	8	1.0701	14.1956	15.8621	26.1162	7.1356	7.2072	9.7087	3.1354	12.8604	11.6959	0.9434	22.3464	3.218	14.1468	2.2642	9.6395	5.8404	5.7389	2.6761	3.0921	13.8528	17.1429	0.7819	18.5615	4.9863	1.8815	3.7736	2.0184	5.0983	0
ATP10D	1013.53	667.369	952.381	709.144	2940.06	745.885	973.448	891.909	1429.88	1360.84	1018.49	388.312	1129.36	158.333	929.3	502.966	698.561	1261.48	966.4	141.252	835.173	1060	591.968	766.565	593.694	343.042	1187.54	1020.57	840.156	586.793	1481.38	634.755	740.053	767.547	792.58	1462.04	1861.55	2772.45	917.749	1304.76	963.809	764.66	639.211	1049.11	1419.57	1363.77	1118.87	269.483	805.769
ATP11A	5253.66	6462.57	4395.02	6179.69	2720.76	2952.67	1745.18	2788.24	5186.47	3953.44	4589.79	1653.25	3068.93	1106.25	2743.03	2094.81	5433.09	4423.48	6754.4	1417.87	5037.07	4324.14	1739.15	1483.18	2309.91	3448.76	4472.66	2663.95	2286.55	3263.21	6704.84	1965.41	2917.77	3223.4	2660.5	4177.16	3588.95	5439.64	4474.34	3107.36	8482.86	2487.1	4610.21	7100.47	7820.32	1116.23	2784.07	2246.9	5481.73
ATP11B	2553.55	775.428	2836.58	3059.45	3365.5	1685.19	3336.01	1652.34	1329.25	2458.82	2790.54	2372.73	1154.68	1110.42	2792.66	1789.35	2018.7	2117.13	1977.6	2847.51	2561.51	3002.76	3372.86	2921.51	3534.23	1135.92	4177.15	3644.1	3112.09	1646.23	2200.19	2906.68	2371.35	2694.34	1188.87	2781.96	2901.72	4699.25	2373.53	695.238	1739.05	2692.73	2689.1	2187.98	2465.66	2258.11	2802.91	1228.7	2444.23
ATP11C	227.734	266.147	586.58	387.097	1444.44	257.202	1018.53	795.196	1032.81	395.462	839.531	449.351	1084.72	347.917	494.901	256.75	288.489	399.192	406.4	256.287	635.647	837.241	678.055	939.857	1016.22	426.106	930.433	927.789	901.559	702.83	327.747	938.858	822.281	798.491	836.493	527.58	443.329	465.643	477.427	1249.35	488.571	677.873	564.965	363.002	407.338	584.151	732.684	802.622	347.115
ATP13A1	2151.07	2523.39	2098.48	2458.01	1096.49	1472.22	2683.48	2888.75	2500.09	4404.89	3031.79	1502.6	1625.75	1702.08	2327.67	2129.05	2982.01	1601.75	2578.4	4141.79	2017.35	2824.83	1729.47	1228.34	1693.69	2844.66	1596.71	2357.13	1390.84	2154.72	2152.7	2176.19	2650.75	2189.43	1696.55	2457.5	2782.64	1774.26	3199.13	1413.85	2228.57	2481.63	1680.97	2243.83	2459.08	1806.04	1464.7	5327.02	1049.04
ATP13A2	1121.76	946.523	814.935	1442.82	592.105	696.502	1859.79	688.369	287.608	1767.5	1550.98	549.351	1039.41	1004.17	2048.27	628.049	696.403	405.832	945.6	1462.81	497.634	344.828	1401.57	466.87	861.261	654.8	348.814	1118.86	684.211	804.717	532.588	894.61	1189.21	1052.08	762.59	820.895	1401.72	371.979	1024.74	1060.61	700	745.895	830.626	929.444	976.482	1274.72	1721.71	4590.68	644.231
ATP13A3	2994.36	2392.32	3097.4	2528.39	1858.19	2325.1	2283.09	3730.09	1871.15	1583.03	3025.64	3823.38	2899.02	1182.29	2791.98	2186.98	2082.73	2910.54	2002.4	1807.92	1559.94	2291.72	2573.9	4244.65	4667.57	1298.81	1786.4	3794.75	2412.28	2654.72	2608.01	2613.84	2268.79	2408.3	2188.16	2402.99	1926.83	2372.82	2781.69	3201.73	2088.57	2767.79	2658.93	3059.59	2662.28	2295.09	2329.92	1776.4	1733.65
ATP13A4	6.7644	8.0044	31.3853	25.5932	59.9415	0	0.7641	25.2845	23.1175	16.5021	31.5811	2.5974	25.9853	8.3333	38.0693	3.95	10.7914	24.8977	4	0.535	22.082	20	33.8544	6.1162	15.3153	2.1575	0.7839	4.593	6.8226	20.7547	11.1732	4.0225	1.7683	10.566	35.3448	22.0636	27.977	11.5965	4.9474	3.4632	11.4286	2.3456	13.9211	4.9863	19.7554	6.0377	30.949	2.185	0
ATP1A1	4852.3	4748.61	4115.74	4009.6	3752.89	3911.52	6463.41	5084.66	5986.73	5242.95	5868.8	1840.26	3868.47	3885.4	5212.76	6896.67	4676.93	3708.92	5240.78	8033.03	6559.14	7121.37	3474.43	5507.65	4308.11	4278.32	4663.12	4484.61	2912.28	5873.57	5507.38	4888.16	3968.15	4090.54	3549.47	5075.92	4931.84	7023.87	4701.24	4167.95	4999	5698.2	4296.97	6305.65	5536.21	3763.77	6862.6	8512.01	5398.08
ATP1A3	19.1657	54.0299	103.896	5.3319	5.848	3.0864	37.4403	614.412	7.4792	43.0234	123.693	84.4156	233.201	86.4583	41.4684	227.783	30.2158	19.9181	40.8	56.1798	18.9274	33.7931	290.18	18.3486	33.3333	170.442	16.4609	49.6045	33.1384	238.679	8.3799	130.33	79.5756	98.8679	106.034	26.6061	12.9125	15.1646	37.1058	6.9264	36.1905	272.869	16.2413	66.8163	13.1703	165.283	93.5199	50.9832	9.6154
ATP1B1	613.596	1776.16	689.567	169.182	265.775	1022.67	529.33	705.638	48.1387	306.392	308.038	1195.99	731.939	550.865	349.504	555.066	549.921	1796.24	701.16	431.916	40.5363	179.676	897.963	818.675	172.108	484.822	1551.61	668.954	1261.5	1077.81	1993.52	1061.83	983.625	538.272	772.165	425.036	346.083	840.798	520.192	365.723	1814.21	560.422	70.1392	1223.04	869.596	941.223	592.257	258.274	458.654
ATP1B2	10.1466	11.0061	31.3853	95.9744	1.462	33.9506	73.3524	34.7661	6.7993	690.143	21.9313	29.8701	1.3326	7.2917	375.935	10.5333	20.8633	93.7812	61.6	0.535	7.0978	4.8276	10.6399	355.759	47.7477	5.3937	21.9479	3.6744	2.924	1.8868	6.5177	8.0451	0.8842	6.0377	6.4263	41.5315	29.4118	3.5681	4.9474	3.4632	145.714	10.9461	15.0812	8.9753	2.8222	1.5094	121.105	29.1333	0
ATP1B3	1288.61	1582.87	1363.64	2131.7	923.977	1337.45	1486.15	1191.53	1859.6	1192.87	1372.9	1068.83	2135.46	2530.21	1534.33	2129.05	1782.01	1039.89	1786.4	1414.13	2163.25	1898.62	1090.11	1697.25	1363.06	1689.32	1472.08	1565.3	1276.8	1699.06	1241.15	1615.45	1166.22	1594.72	1424.5	1849.45	1294.84	1797.45	2250.46	1625.11	1379.05	2278.34	1767.98	1708.3	1707.43	1344.91	1399.43	1377.28	2156.73
ATP1B4	0	0	0	0	0	0	0	0	0	0	0.8773	0	0	0	0	0	0	0	0	0.535	0	0	0	0	0	0	0	0	0	0	0	0	0	0	0	0	0	0	0	0	0	0	0	0	0	0	0	1757.47	0
ATP2A1	98.0834	68.0976	47.619	122.634	36.5497	13.3745	48.9016	68.9001	75.4717	88.4043	42.9854	10.3896	77.2895	67.7083	77.4983	88.2165	45.3237	33.1969	36	100.589	48.1546	48.9655	60.9379	28.5423	31.5315	88.4574	30.5703	40.4185	38.9864	62.2642	51.2104	53.9019	35.3669	30.9434	27.8474	35.0422	71.736	61.5505	33.3952	38.961	37.1429	57.8577	15.0812	42.8821	36.6886	55.0943	37.6771	88.8565	7.6923
ATP2A2	6013.53	5774.19	6186.15	6282.06	4266.08	3353.91	4533.33	4572.06	5858.24	4868.13	4184.49	2823.38	6622.25	2247.92	4607.07	4768.96	7115.83	4787.82	6508	9917.07	5424.29	6464.83	4411.71	3762.49	4095.5	4132.69	3465.41	5157.04	3871.34	5016.98	6198.32	4224.46	4852.34	4714.72	3603.02	4915.64	4368.01	5180.95	5654.3	4657.14	6419.05	4669.27	4542.92	6776.36	10391.3	6128.3	4034.81	4302.26	3621.15
ATP2A3	11920	9717.37	11996.8	13851.2	8903.51	12714	13473.2	14407.7	9008.33	33179.4	16630.1	7540.26	13571.6	11916.7	22102	14729.5	12620.1	6371.31	6876	14232.7	11015.8	11472.4	11973.8	7035.68	4352.25	18011.9	11354.9	11963	8689.08	7898.11	6727.19	13160.1	16433.2	8200	9514.17	11680.1	16234.6	9051.5	11103.3	9182.68	10897.1	9172.79	7738.98	7315.88	12096.9	8482.26	6016.89	19592.1	5611.54
ATP2B1	1156.71	1531.85	1238.1	1339.38	1377.19	1907.41	987.966	2707.33	1341.49	569.913	1426.41	2180.52	2423.96	1595.83	636.982	1526.01	4302.16	2288.92	1434.4	1659.18	866.719	2077.24	1317.42	1406.73	1089.19	1466.02	771.311	2289.16	3688.11	2923.58	1949.72	1854.38	2877.1	1809.06	4610.89	1033.74	753.228	1638.67	1759.43	2315.15	2485.71	1993.75	1693.74	1485.91	5667.92	2451.32	1704.21	663.511	2446.15
ATP2B2	22.5479	21.0116	6.4935	14.9294	19.0058	13.3745	3.8204	5.689	3.3996	4.7149	6.1408	9.0909	2.6652	3.125	4.0789	1.3167	67.6259	10.789	7.2	2.6752	4.7319	3.4483	12.5745	1.0194	7.2072	20.4962	14.1093	4.593	2.924	6.6038	3.7244	5.6315	6.1892	6.0377	6.4263	3.2446	7.891	8.0283	1.8553	15.5844	15.2381	3.9093	5.8005	6.9808	452.493	13.5849	3.364	7.2833	0
ATP2B4	8661.78	5884.25	5543.29	12463.9	10795.3	5344.65	6927.22	6623.26	977.732	7524.38	8819.9	3167.53	5367.62	3806.25	7374.58	3594.49	5821.58	5748.87	5212	1173.35	2406.15	2094.48	9906.76	9035.68	9347.75	2590.08	11795.4	5909.37	4819.69	5033.02	6493.48	5488.33	6944.3	5863.4	5072.51	6221.28	6650.65	12689.2	4063.08	8357.58	9635.24	4065.68	6127.61	7281.97	10359.4	5261.13	9298.16	6587.76	6786.54
ATP2C1	2858.39	2936.03	2514.83	2547.01	5729.81	3106.75	4267.35	3527.79	3858.66	1917.15	3882.47	2446.81	3726.17	3382.43	3230.39	2209.56	2804.07	3534.97	3237.69	1417.31	3819.24	3709.76	5279.04	5066.52	4780.53	1583.89	4901.56	4336.19	4001.31	3675.06	3521.85	3600.52	4411.49	3205.79	4766.29	3253.78	2631	3865.17	2423.98	5361.25	3489.25	3061.39	2660.09	2628.33	3287.56	3777.37	2842.47	2153.39	1701.73
ATP2C2	9.0192	2.0011	20.5628	3.1991	1.462	4.1152	1.5282	0.6321	4.7595	0.5894	8.7725	0	3.9977	4.1667	2.7192	13.1666	0	4.9795	8.8	10.1659	17.3502	9.6552	5.8036	7.1356	5.4054	18.3387	8.6224	8.2674	10.7212	0	2.7933	8.0451	9.7259	3.7736	4.2842	5.8404	7.1736	0.892	1.8553	4.329	22.8571	3.1274	9.2807	0	10.3481	12.8302	10.7649	5.0983	10.5769
ATP5A1	8989.85	8476.68	4479.44	5876.83	6861.11	6412.55	9110.98	6169.41	6460.65	7083.54	8024.23	1532.47	7091.98	9758.33	10399	9053.38	3823.02	7996.3	7424.8	7741.57	8380.91	6924.83	4440.73	10329.3	9034.23	2663.43	6059.18	5506.1	6488.3	6011.32	8295.16	7688.66	6067.2	8510.19	6678.02	9633.35	8243.9	6695.63	9124.92	7577.49	7277.14	6816.26	6513.92	7701.82	3601.13	6809.06	5520.36	3799.71	3973.08
ATP5B	9870.35	10537.8	7121.21	6444.15	8678.36	5922.84	10799.6	7172.57	9669.22	12087.8	9135.71	4231.17	9413.33	11736.5	12550	12017.2	8060.43	7481.75	7810.4	14225.3	10911.7	11893.1	6373.33	10403.7	10187.4	7281.55	6775.62	6960.25	8897.66	8712.26	10268.2	9308.93	8669.32	11470.2	7986.85	11436.1	9781.92	9001.54	12594.9	9422.51	8842.86	9306.49	8008.12	9506.86	6214.49	8138.87	6960.84	8682.45	7149.04
ATP5C1	2545.66	3508.94	1719.7	1485.47	2372.81	2066.87	2464.18	1776.23	2104.37	2183.59	2172.08	1733.77	2096.15	3953.12	2382.73	3578.69	1913.67	2415.07	2584.8	2530.23	3027.6	2347.59	2013.85	2667.69	2456.76	1309.6	1971.39	2025.52	2418.13	2056.6	2399.44	2419.15	2343.06	3472.45	2371.31	2744.32	2446.92	2265.77	3370.44	2891.77	2080	2722.44	2175.17	2519.07	1870.18	2864.15	1904.04	1474.87	1808.65
ATP5D	401.353	699.386	564.935	584.378	197.368	582.304	710.602	673.198	380.078	1739.8	655.308	1567.53	485.725	2167.71	706.322	1320.61	1159.71	577.626	482.4	3632.96	500.789	602.759	367.562	557.594	859.46	622.438	370.762	405.104	326.511	369.811	631.285	722.446	435.013	615.094	323.458	733.939	574.606	487.944	949.907	436.364	560	745.113	417.633	423.834	384.76	607.547	405.029	1728.33	570.192
ATP5E	1772.27	1547.86	1139.61	1602.77	1301.17	2915.64	1161.41	1124.53	1027.37	1189.92	1157.97	7149.35	953.46	2828.12	1124.41	2861.11	1866.91	1725.41	854.4	3407.7	1589.91	1142.07	1109.46	1446.48	2103.6	2477.89	800.313	1185	1300.19	906.604	1458.1	1250.2	821.397	1291.32	1071.05	1601.56	1164.28	1071.34	1550.4	1267.53	1261.9	1787.33	1490.72	1418.1	1173.1	1332.83	1264.2	1164.6	2364.42
ATP5EP2	30.4397	35.0193	9.7403	22.394	19.0058	56.5844	18.3381	11.378	15.6383	4.7149	7.018	77.9221	5.3303	32.2917	10.877	50.0332	10.7914	25.7276	7.2	5.3505	21.2934	8.2759	2.9018	22.4261	27.027	15.1025	5.487	11.9418	11.6959	16.0377	9.311	14.4811	15.9151	18.1132	12.8526	16.2232	14.3472	15.1646	11.7502	11.2554	14.2857	23.4558	13.9211	21.9397	8.4666	12.8302	22.2026	5.0983	6.7308
ATP5F1	2488.16	2565.42	1444.81	1575.05	1988.3	2332.3	2016.43	1812.26	1943.23	1326.06	2046.63	1781.82	1727.69	3790.62	2299.12	2625.43	1243.17	2561.97	2048	1761.9	2710.57	2281.38	1771.07	2539.25	2727.93	1113.27	1544.19	1710.44	2404.48	1894.34	2302.61	2295.25	1771.88	2689.81	2118.54	2667.75	2177.19	2152.48	2549.17	2360.17	2094.29	2590.3	2278.42	2003.49	1561.62	2087.55	2624.61	919.884	2217.31
ATP5G1	483.653	512.283	350.649	325.247	315.789	653.292	425.597	312.263	298.487	531.605	363.183	2498.7	273.178	1089.58	332.427	646.482	550.36	297.942	516.8	477.796	385.647	362.069	293.082	691.131	748.649	711.974	235.156	397.755	264.133	395.283	265.363	411.907	222.812	458.868	393.077	544.452	364.419	298.832	568.336	317.749	282.857	588.741	555.684	408.876	306.679	262.642	249.611	997.815	91.3462
ATP5G2	4919.95	4851.68	3074.68	3520.13	1963.45	3359.05	4008.41	3782.55	2643.55	4424.93	3345.84	17589.6	2759.1	8582.29	2871.52	6637.31	3233.81	3856.65	3540.8	7990.37	3710.57	2657.93	3112.67	5237.51	3986.49	7707.66	2938.66	2630.88	3191.03	2861.32	4191.81	3063.56	2082.23	2562.26	3110.34	3800.13	3104.73	3466.45	3139.15	3011.26	3050.48	5198.59	3406.03	3431.56	1609.6	3699.62	1574.36	4479.97	2259.62
ATP5G3	1818.49	1881.04	1387.45	1489.74	1597.95	970.165	1638.97	1362.83	1375.49	1132.16	1522.91	4324.68	968.784	2731.25	1769.54	1373.28	1119.42	1432.45	1672	1543.07	1820.19	1490.34	1063.03	1601.43	1690.99	2110.03	1356.07	1421.08	1194.93	1491.51	1419.93	1576.03	1272.33	2312.45	1241.35	2121.35	1596.84	1759.1	2673.47	1443.29	1371.43	1889.76	1408.35	1343.31	1109.13	1443.77	1115.51	1264.38	1206.73
ATP5H	786.922	1046.58	433.983	581.178	570.175	1198.56	560.841	419.722	424.273	529.837	444.767	1474.03	521.038	1278.12	481.305	1185	859.712	677.216	599.2	865.168	588.328	507.586	414.958	720.693	721.622	664.509	378.601	518.092	567.251	532.076	690.875	671.762	374.005	628.679	526.958	744.322	556.671	480.808	727.273	550.649	500.952	968.726	646.172	646.223	717.78	520.755	427.904	420.248	502.885
ATP5I	407.554	271.51	253.81	453.874	78.9474	547.325	243.836	235.86	193.174	347.718	205.163	1472.49	228.197	554.167	188.559	456.264	379.273	361.846	253.192	1391.56	306.704	259.069	52.5033	228.838	453.234	456.559	163.527	271.906	149.405	209.821	281.676	213.242	117.339	234.4	260.673	320.733	212.984	220.627	390.216	273.593	216.619	381.658	286.601	243.959	228.1	192.559	118.568	308.281	156.731
ATP5J	1375.98	1296.5	692.219	890.013	793.889	2100.82	747.691	767.016	664.749	806.424	597.435	5259.82	612.286	1956.23	773.923	1521.91	1496.3	1577.61	1034.13	1025.29	936.238	690.448	715.952	1090.93	979.477	1453.47	743.861	715.095	822.505	668.934	1023.58	707.072	542.679	853.487	640.19	1291.63	699.62	628.485	1091.45	811.593	786.419	1293.88	945	968.507	707.573	852.355	648.961	1122	811.442
ATP5J2	596.392	600.332	334.416	478.806	355.263	1457.82	737.345	473.451	310.726	1420.95	318.443	2835.06	354.466	1977.08	679.13	1102.05	2147.48	485.504	421.6	2521.67	354.101	571.034	309.526	576.962	727.027	820.928	297.08	373.871	204.678	319.811	712.29	445.696	285.588	617.359	278.474	785.204	522.238	134.698	593.074	440.693	386.667	920.25	593.967	306.158	774.224	206.038	448.088	875.455	898.077
ATP5L	2845.55	2095.16	1487.01	1696.61	2192.98	3339.51	1655.01	1670.04	1170.15	2531.31	1300.97	12472.7	1370.56	3309.38	1738.95	3012.53	2120.14	2386.86	1541.6	3161.58	1925.08	1337.24	2634.84	2227.32	2300	3845.74	1880.46	1252.06	1392.79	1310.38	2364.99	1305.71	905.394	1224.15	1534.82	2023.36	1858.68	1775.15	1465.06	1822.51	1694.29	1882.72	1857.31	1695.34	1123.24	1535.09	2058.11	1869.63	1893.27
ATP5L2	20.2931	10.0055	24.8918	6.3983	5.848	5.144	1.5282	1.8963	1.3599	3.5362	7.8953	6.4935	8.6618	11.4583	5.4385	18.4333	1.4388	8.2992	12	3.2103	9.4637	6.8966	5.8036	8.1549	13.5135	8.63	7.8385	6.4302	15.5945	11.3208	10.2421	5.6315	8.8417	8.3019	4.2842	3.8936	2.1521	10.7044	3.0921	12.1212	10.4762	8.6005	8.1206	6.9808	7.5259	4.5283	6.728	4.37	0
ATP5O	2133.03	2112.17	1221.86	1200.75	1469.3	1763.37	1666.48	1308.47	1323.13	1235.3	1520.28	3187.01	1368.56	2763.54	1881.03	3034.91	1071.28	1657.35	1425.6	2604.6	2039.43	1462.76	1058.19	2110.09	1739.64	1661.27	1410.15	1373.31	1637.43	1385.85	1750.47	1547.06	1248.45	1752.45	1509.11	1947.44	1596.13	1516.46	1826.22	1583.55	1485.71	1940.58	1580.05	1375.22	892.756	1366.79	935.199	951.202	1126.74
ATP5S	162.345	147.081	181.818	141.829	198.83	128.601	171.156	207.965	211.457	112.568	213.172	254.546	156.578	243.75	167.233	179.066	133.813	195.032	128	141.252	182.177	233.793	177.977	224.261	206.306	263.215	210.856	245.267	154.971	168.868	129.423	197.104	233.422	253.585	207.784	187.541	140.603	173.055	209.648	189.61	145.714	198.593	140.371	133.632	147.695	169.057	153.399	107.065	126.923
ATP5SL	1213.08	1120.62	1169.91	977.873	438.596	915.638	1196.56	1219.34	950.535	1396.79	1028.14	1297.4	874.838	1031.25	982.325	1701.13	1011.51	700.454	970.4	1025.15	1048.9	993.793	884.083	809.378	833.333	1455.23	706.251	733.045	904.483	1010.38	1068.9	917.136	804.598	880	838.635	831.278	1055.95	1107.91	1223.25	894.372	1015.24	1064.89	747.1	869.609	742.239	944.906	697.699	1483.61	582.692
ATP6AP1	5976.32	3676.03	2215.37	4634.5	1808.48	6568.93	2626.17	2723.14	1832.4	4898.78	2678.25	4102.6	2395.31	3683.33	2261.05	4541.18	5869.06	3167.81	3122.4	10998.9	2201.1	2632.41	2285.65	2092.76	1897.3	3982.74	2747.4	2243.23	1842.11	2767.92	4716.01	2403.86	2465.96	2531.32	2016.79	3233.61	3117.65	4172.06	3622.76	2212.12	4296.19	2790.46	2711.14	3447.52	4799.62	2180.38	2010.34	5319.01	3314.42
ATP6AP1L	21.4205	36.0199	44.3723	101.306	19.0058	11.3169	38.2044	65.7396	61.8732	14.7341	15.7905	20.7792	18.6561	30.2083	44.1876	17.1166	16.5468	59.7544	29.6	7.4906	18.1388	48.2759	101.563	24.4648	21.6216	17.26	109.739	91.8603	18.5185	21.6981	45.6238	41.8343	26.5252	64.1509	33.2027	40.8825	20.8034	52.6302	22.2635	38.0952	14.2857	30.4926	6.9606	31.9122	8.4666	20.3774	12.7833	10.1966	2.8846
ATP6AP2	3273.96	1677.93	1311.69	2155.16	1409.36	3901.23	1629.8	1378.63	1459.12	1349.05	1645.73	1989.61	1337.91	2071.88	1600.95	2006.6	2077.7	1966.92	2496.8	1720.17	2238.17	1794.48	1473.15	1912.33	1590.09	1200.65	1513.62	1474.36	1833.33	1455.66	2335.2	2119.87	1671.09	1686.79	1835.79	1940.3	1890.96	2426.34	2108.23	2055.41	2300	1829.55	2648.49	2407.38	1873	1648.3	2204.11	1351.78	2657.69
ATP6V0A1	854.566	976.539	1264.07	826.446	239.766	1866.26	1104.11	876.106	45.555	1207.6	1385.18	281.818	233.201	813.542	532.971	377.883	1615.11	1179.32	708.8	3714.82	309.937	164.138	34.8216	983.69	2711.71	434.736	1035.47	622.813	304.094	903.774	1256.98	1075.62	2473.03	1903.4	779.727	724.854	592.539	773.396	1038.96	1519.48	1459.05	241.595	1684.45	919.471	1730.01	604.528	721.247	811.362	1900
ATP6V0A2	1517.47	1491.82	3850.65	1433.22	3827.49	1468.11	1881.18	3075.22	1678.74	1848.83	1655.38	2233.77	3143.55	1337.5	2802.18	2196.2	1212.23	2027.5	1487.2	574.104	2007.89	1652.41	3789.75	2167.18	1734.23	1193.1	2847.74	2554.63	4700.78	2283.96	1905.96	2416.73	2833.78	1460.38	1762.95	2650.23	2666.43	1908.07	1488.56	3086.58	1685.71	2465.99	1780.74	1674.4	1464.72	1814.34	1843.49	1310.27	1351.92
ATP6V0B	2746.34	2417.34	2417.75	3175.69	1160.82	2459.88	1291.31	1381.8	1711.37	2102.25	1048.32	7545.45	1341.24	2160.42	1356.9	3860.46	3182.73	2184.35	1525.6	6172.82	1769.72	1834.48	976.94	862.385	928.829	1715.21	828.532	1492.73	1284.6	2159.43	1901.3	1238.94	1167.99	1529.81	927.533	2184.3	1409.61	1109.69	1768.71	1020.78	1501.9	2383.11	1694.9	2126.15	3392.29	672.453	1122.91	1492.35	2359.62
ATP6V0C	3591.48	2753.76	2290.78	3153.1	919.591	2277.78	2261.92	1801.29	1546.25	5342.79	1724.64	7449.35	2381.04	3529.17	2618.28	5447.73	6345.45	1950.21	2089.53	20883.7	2074.38	2130.32	1474.12	1483.29	2027.27	3274	1342.43	1638.79	1115.01	1702.83	3339.25	2186.98	1432.36	1629.4	1257.42	2419.86	2098.62	2376.84	2504.58	1393.07	2614.66	2254.13	2800.94	3086.08	3425.44	1774.05	1823.3	6143.3	3830.77
[truncated: 14,484 more rows]
[truncated: 124 more columns]
